# Supplementary material for: Obox4 promotes zygotic genome activation upon loss of Dux
Source: eLife journal article supplement (doi:10.7554/elife.95856), 2024-06-10
Supplement: figures [file elife-95856-figures-v2.pdf]

---

## Figures and figure supplements

*Obox4* promotes zygotic genome activation upon loss of *Dux*

**Youjia Guo, Tomohiro Kitano and Kimiko Inoue et al.**

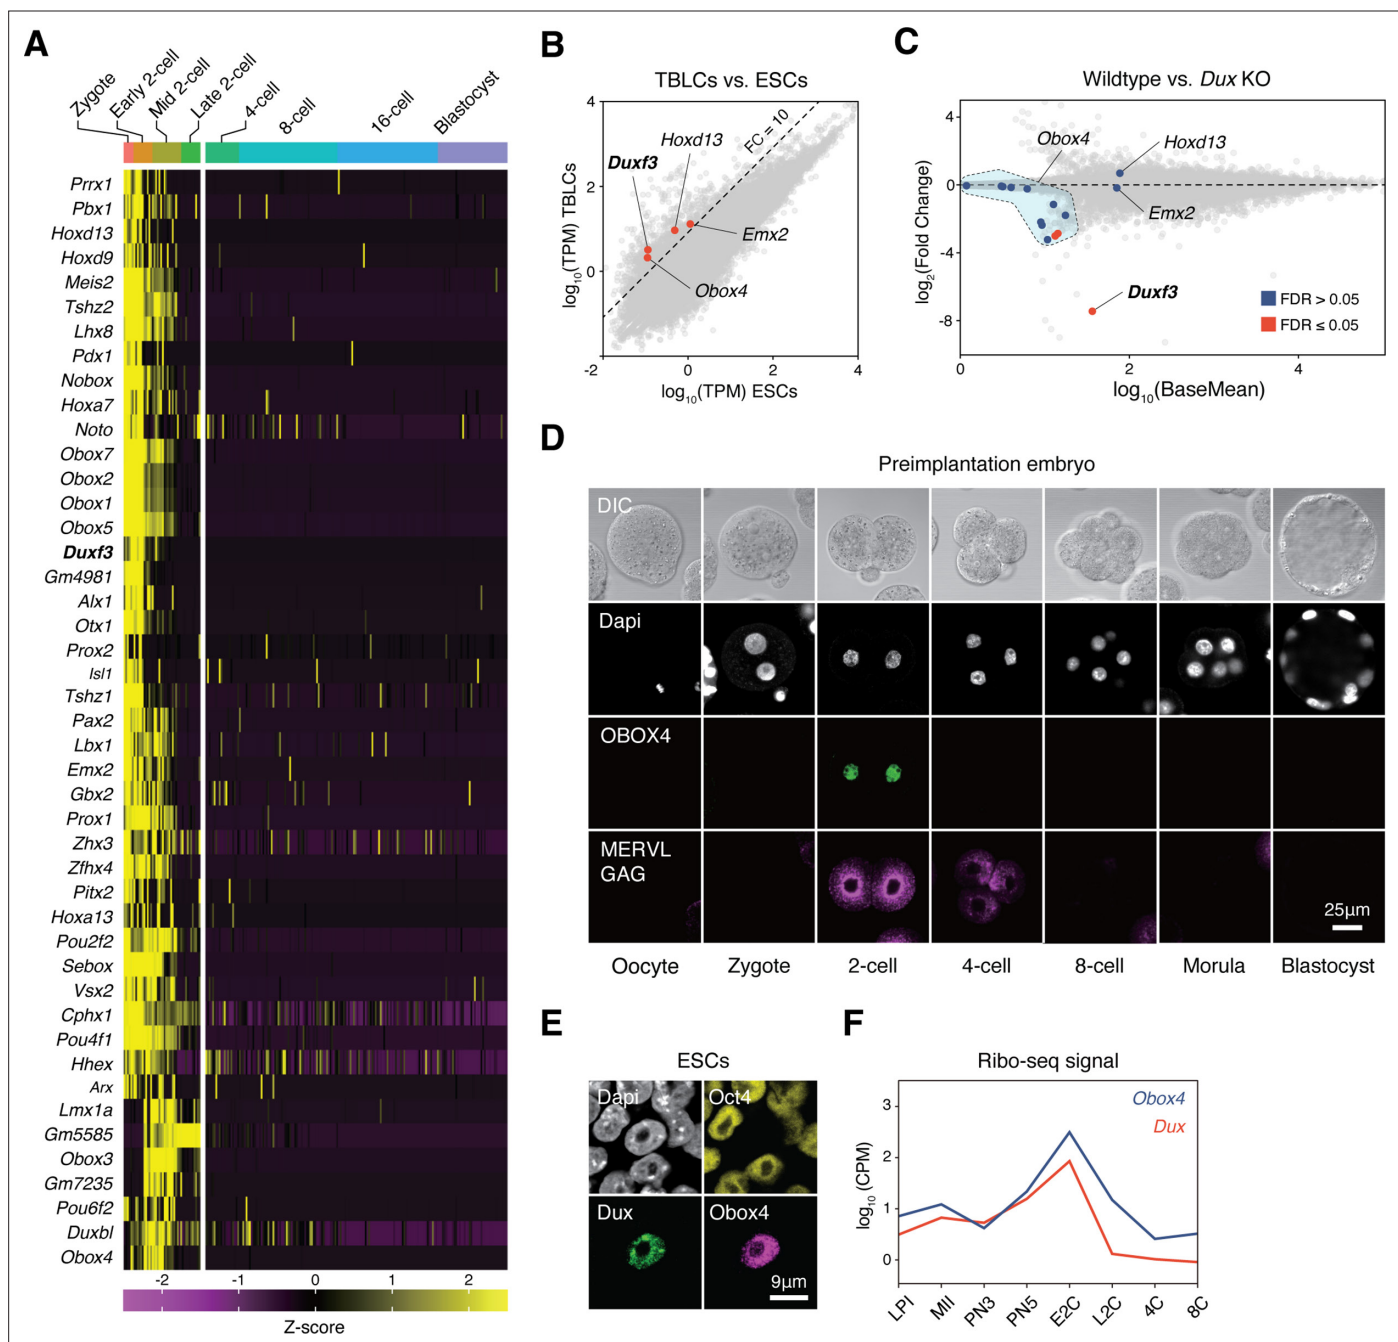

**Figure 1.** OBOX4 is expressed during zygotic genome activation (ZGA). (A) Mouse homeobox genes that are specifically expressed during ZGA. The genes were identified by means of statistically determined *k*-means clustering based on their expression in preimplantation embryos. *Dux* is shown in a bold italic font. (B) Scatterplot showing per-gene normalized read counts in mouse totipotent blastomere-like cells (TBLCs) versus mouse embryonic stem cells (mESCs). Genes with more than tenfold normalized read counts (FC = 10) have been highlighted. *Dux* is shown in a bold italic font. (C) MA plot displaying gene expression in *Dux* knockout 2C-embryos versus WT 2C-embryos. Loss of *Dux* partially downregulates the multicopy homeobox gene *Obox4*. (D) Immunofluorescence staining of OBOX4 and MERVL GAG at different preimplantation embryo stages. (E) Immunofluorescence staining of DUX, OBOX4, and OCT4 in 2C-like mESCs. (F) Translation profile of DUX and OBOX4 during preimplantation characterized by Ribo-seq signal.

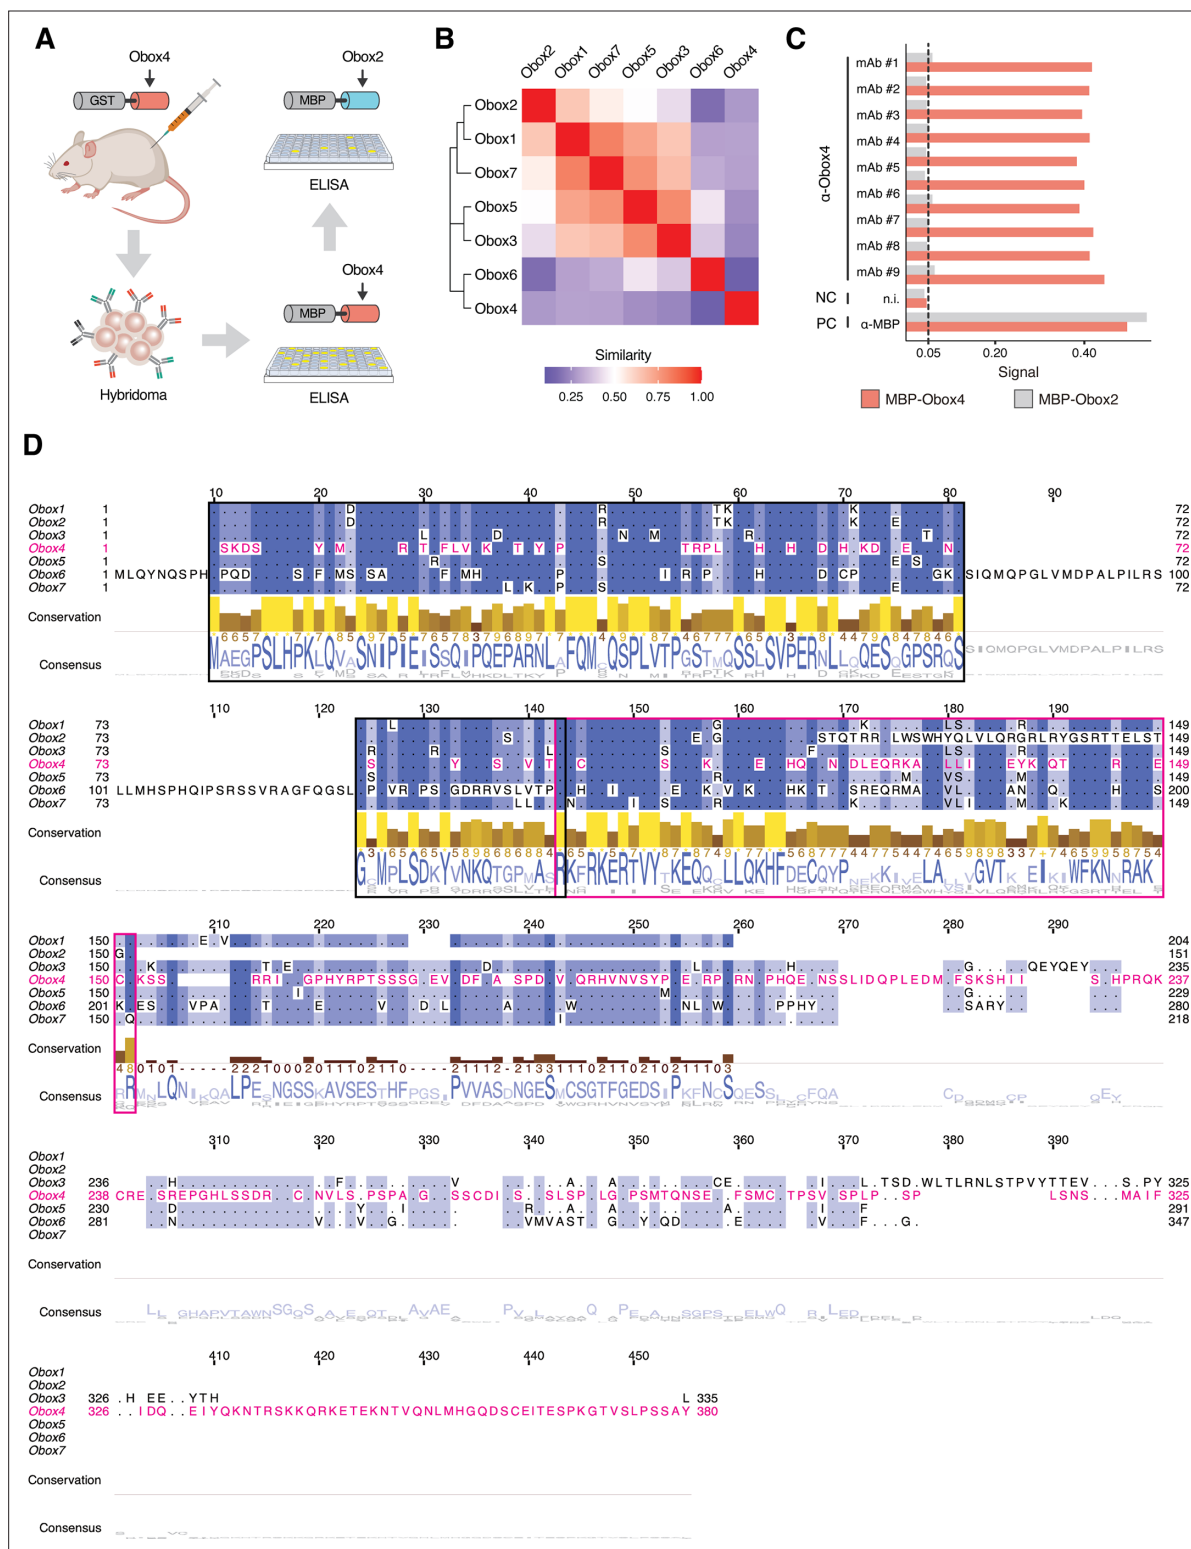

**Figure 1—figure supplement 1.** Production of anti-OBOX4 monoclonal antibodies. **(A)** Schematic of the production of monoclonal antibodies. Mice were immunized with the GST-OBOX4 fusion protein. After fusing B-cells with myelomas, the antibodies produced by hybridomas were examined against MBP-OBOX4 fusion protein, followed by MBP-OBOX2 fusion protein, for identification of OBOX4-specific antibodies. **(B)** Analysis of protein sequence similarity among the OBOX family members. The Smith–Waterman local alignment method was used to align the amino acid sequences, and the divergence among different sequences was represented in the form of a block substitution matrix. **(C)** ELISA signal of anti-OBOX4 monoclonal antibodies against the MBP-OBOX4 and MBP-OBOX2 fusion proteins. Anti-OBOX4 monoclonal antibodies were not reactive to MBP-OBOX2. **(D)**

Figure 1—figure supplement 1 continued on next page

*Figure 1—figure supplement 1 continued*

Multiple-sequence alignment of protein sequence among the OBOX family members. The homeodomains are highlighted by a magenta box. The peptide sequences used for antibody production are highlighted by a black box.



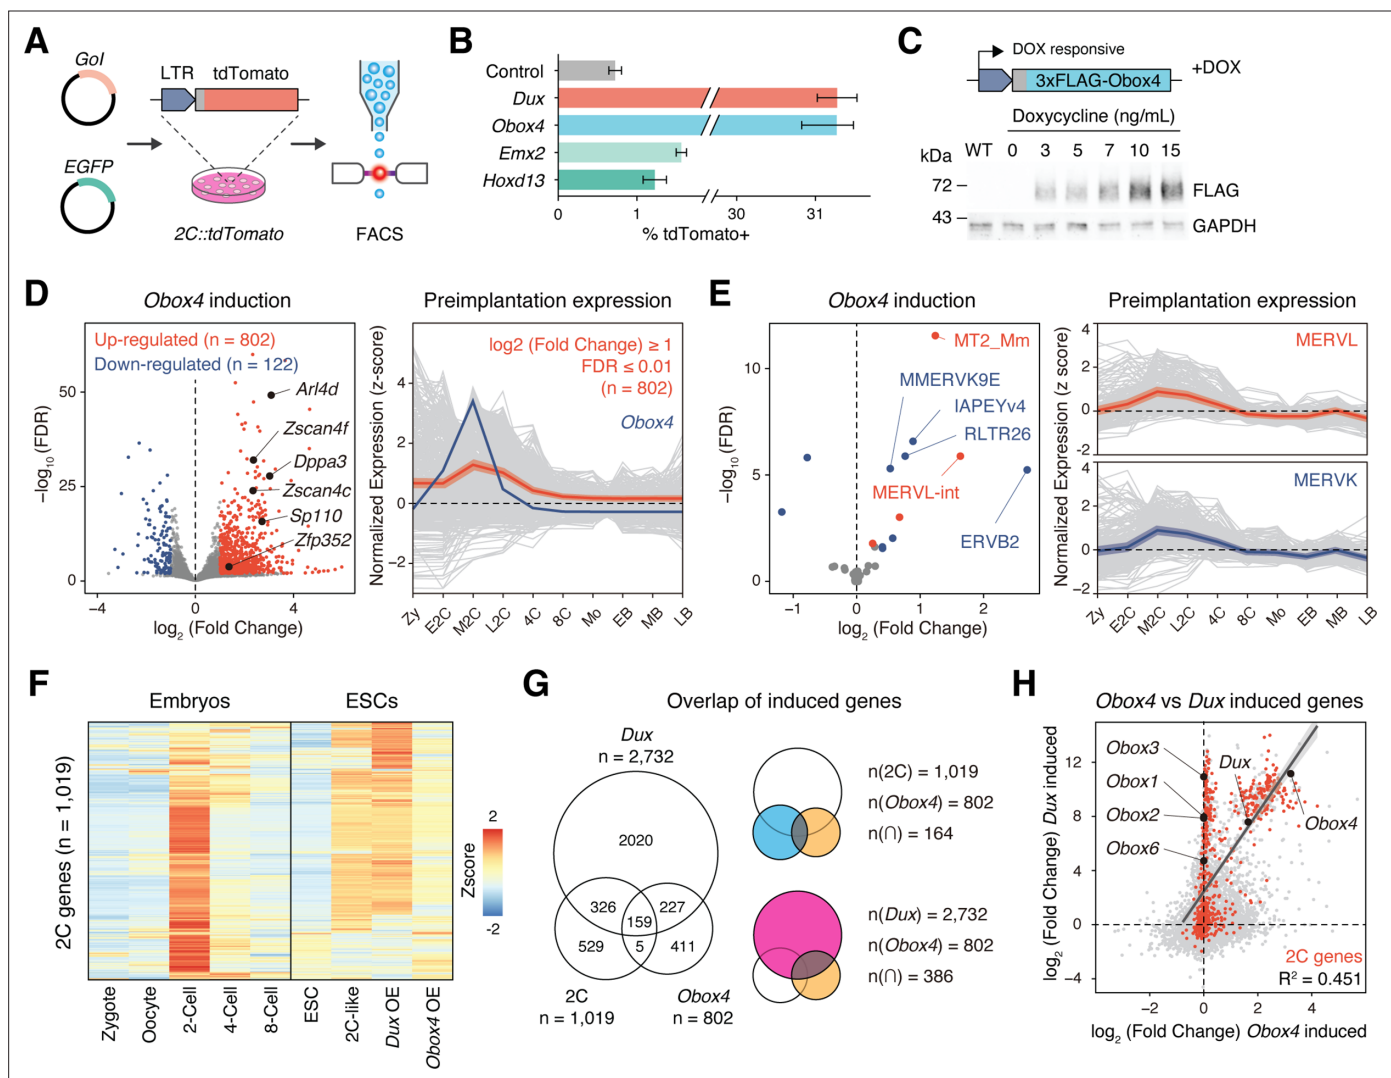

**Figure 2.** *Obox4* and *Dux* induce 2C-gene expression in mouse embryonic stem cells (mESCs). **(A)** Diagram of the 2C::tdTomato reporter assay. mESCs bearing the tdTomato expression cassette under the control of the MERVL long terminal repeat (LTR) promoter showed red fluorescence upon entering the 2C-like state. The expression of the transcription factor increased the 2C-like population, as detected using FACS. An EGFP expression plasmid was co-transfected with a gene of interest to normalize the transfection efficiency. **(B)** Boxplot showing normalized 2C-like cell percentage in 2C::tdTomato reporter mESCs overexpressing candidate pioneer factors. *Dux* and *Obox4* potentially induced a 2C-like state.  $n = 3$  biological replicates. Error bars indicate standard deviations. **(C)** Upper panel: schematic of *Obox4*-inducible cell line construction. Lower panel: western blot showing OBOX4 level upon induction by different concentrations of doxycycline. Expression of OBOX4 was carried out in a dose-dependent manner. **(D)** Left panel: volcano plot of differentially expressed genes (DEGs) in mESCs with *Obox4* induction for 48 hr. Representative 2C-genes are labeled with gene symbols. Right panel: expression profile of genes upregulated by *Obox4* during embryogenesis.  $n = 3$  biological replicates. **(E)** Left panel: volcano plot of differentially expressed transposable elements in mESCs with *Obox4* induction for 48 hr. MERVL and MERVK elements were highlighted. Right panel: expression profile of MERVL and MERVK elements during preimplantation embryogenesis.  $n = 3$  biological replicates. **(F)** Heatmaps of the expression of 2C-genes in preimplantation embryos, naturally occurred 2C-like mESCs, and induced 2C-like mESCs. **(G)** Venn diagram showing overlap of 2C-genes with genes induced by ectopic expression of *Dux* and *Obox4* in mESCs. **(H)** Scatterplot showing per-gene expression changes in *Dux*-induced versus *Obox4*-induced mESCs. 2C-genes are highlighted in red.

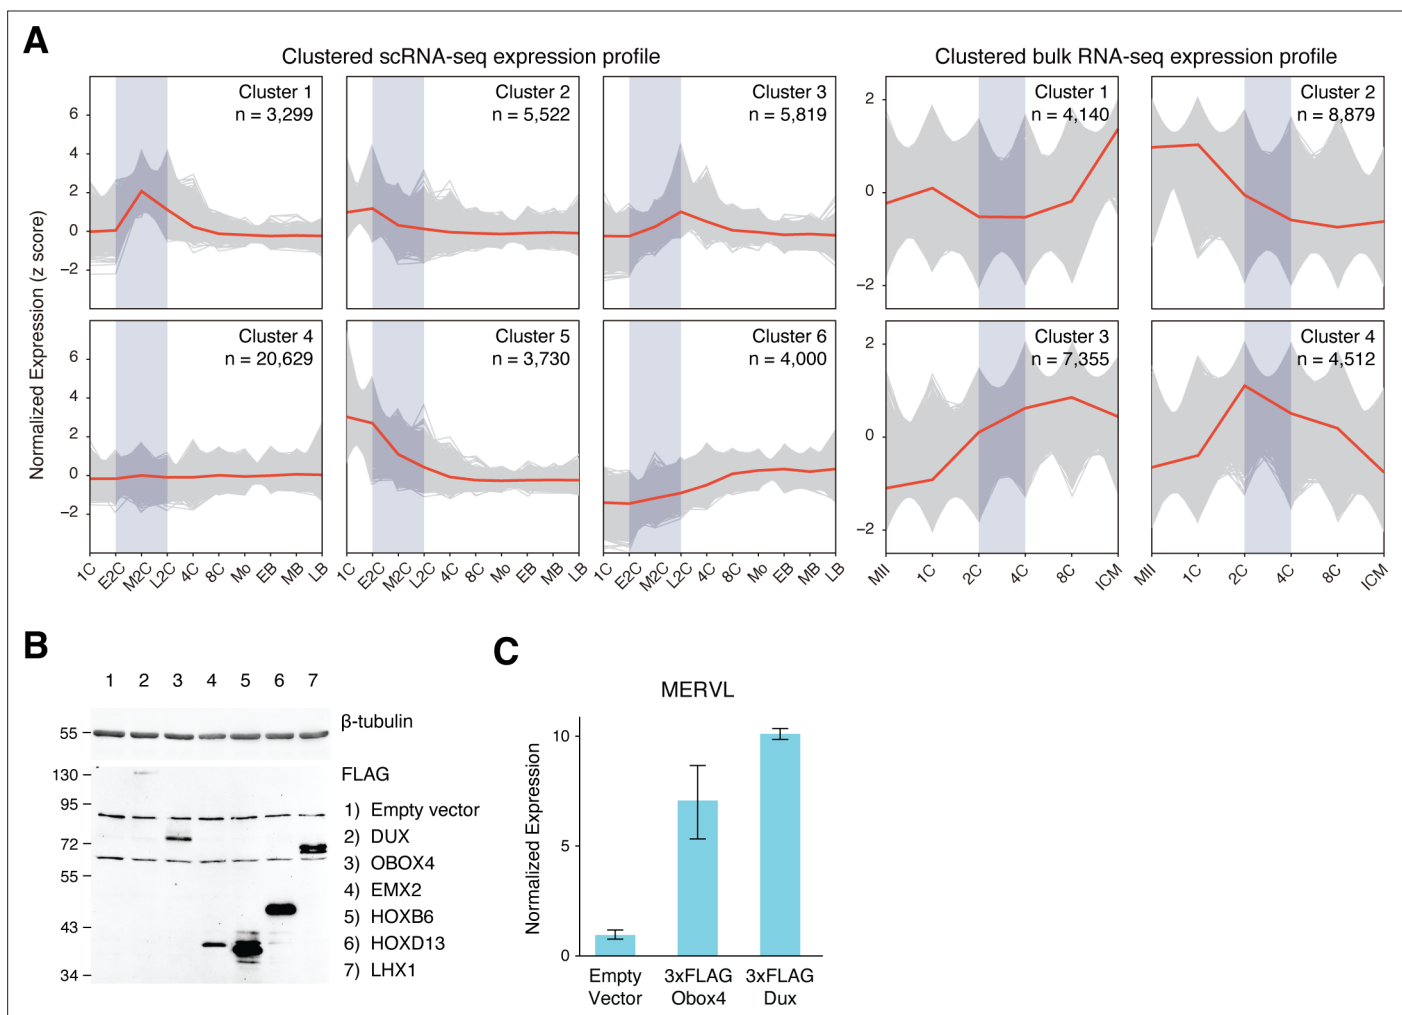

**Figure 2—figure supplement 1.** *k*-means clustering of reimplantation gene expression and MERVL induction by ectopic *Obox4* and *Dux* expression. **(A)** Expression profiles of *k*-means clustered gene sets during preimplantation development based on z-scored expression of scRNA-seq and bulk RNA-seq. Genes appeared in both scRNA-seq cluster 1 and bulk RNA-seq cluster 4 were designated as 2C-genes. **(B)** Western blot showing protein products of the candidate genes ectopically expressed in mouse embryonic stem cells (mESCs) at 18 hr post transfection. **(C)** Bar plot showing MERVL transcript level in mESCs at 18 hr post *Dux* or *Obox4* transfection, detected by reverse transcription quantitative real-time PCR (RT-qPCR). n = 3 biological replicates. Error bars indicate standard deviations.

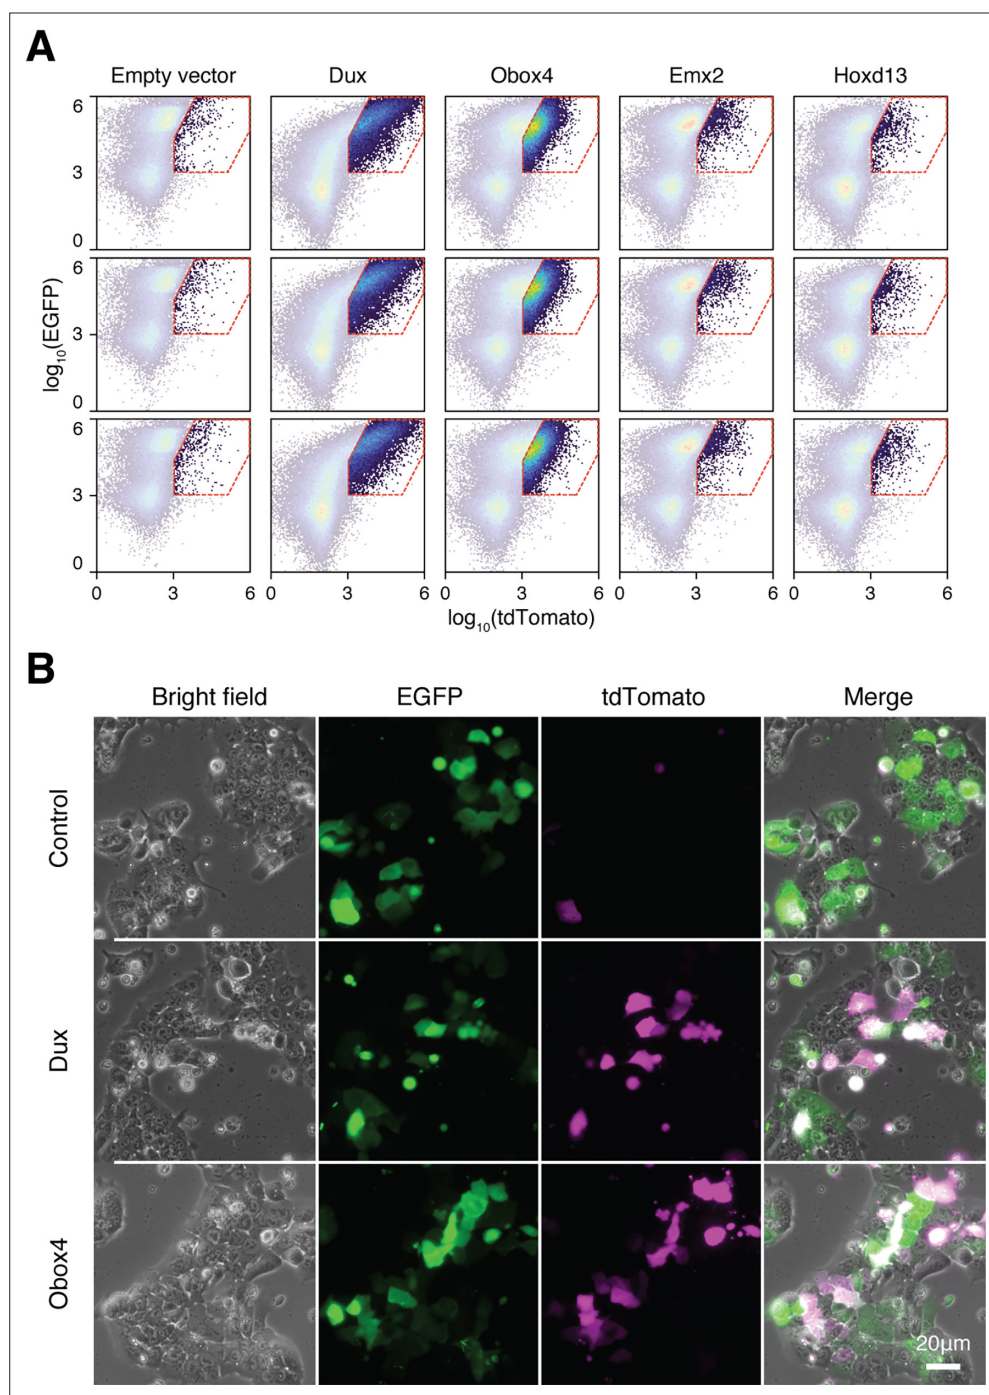

**Figure 2—figure supplement 2.** Ectopic expression of Obox4 and Dux activates MERVL reporter. **(A)** FACS analysis of 2C::tdTomato cells co-transfected with candidate gene expression plasmids and EGFP. **(B)** Fluorescence microscopy of 2C::tdTomato mESCs transfected with empty plasmid, plasmid encoding DUX, or plasmid encoding OBOX4. Plasmids encoding EGFP were co-transfected to normalize the transfection efficiency in FACS analysis.

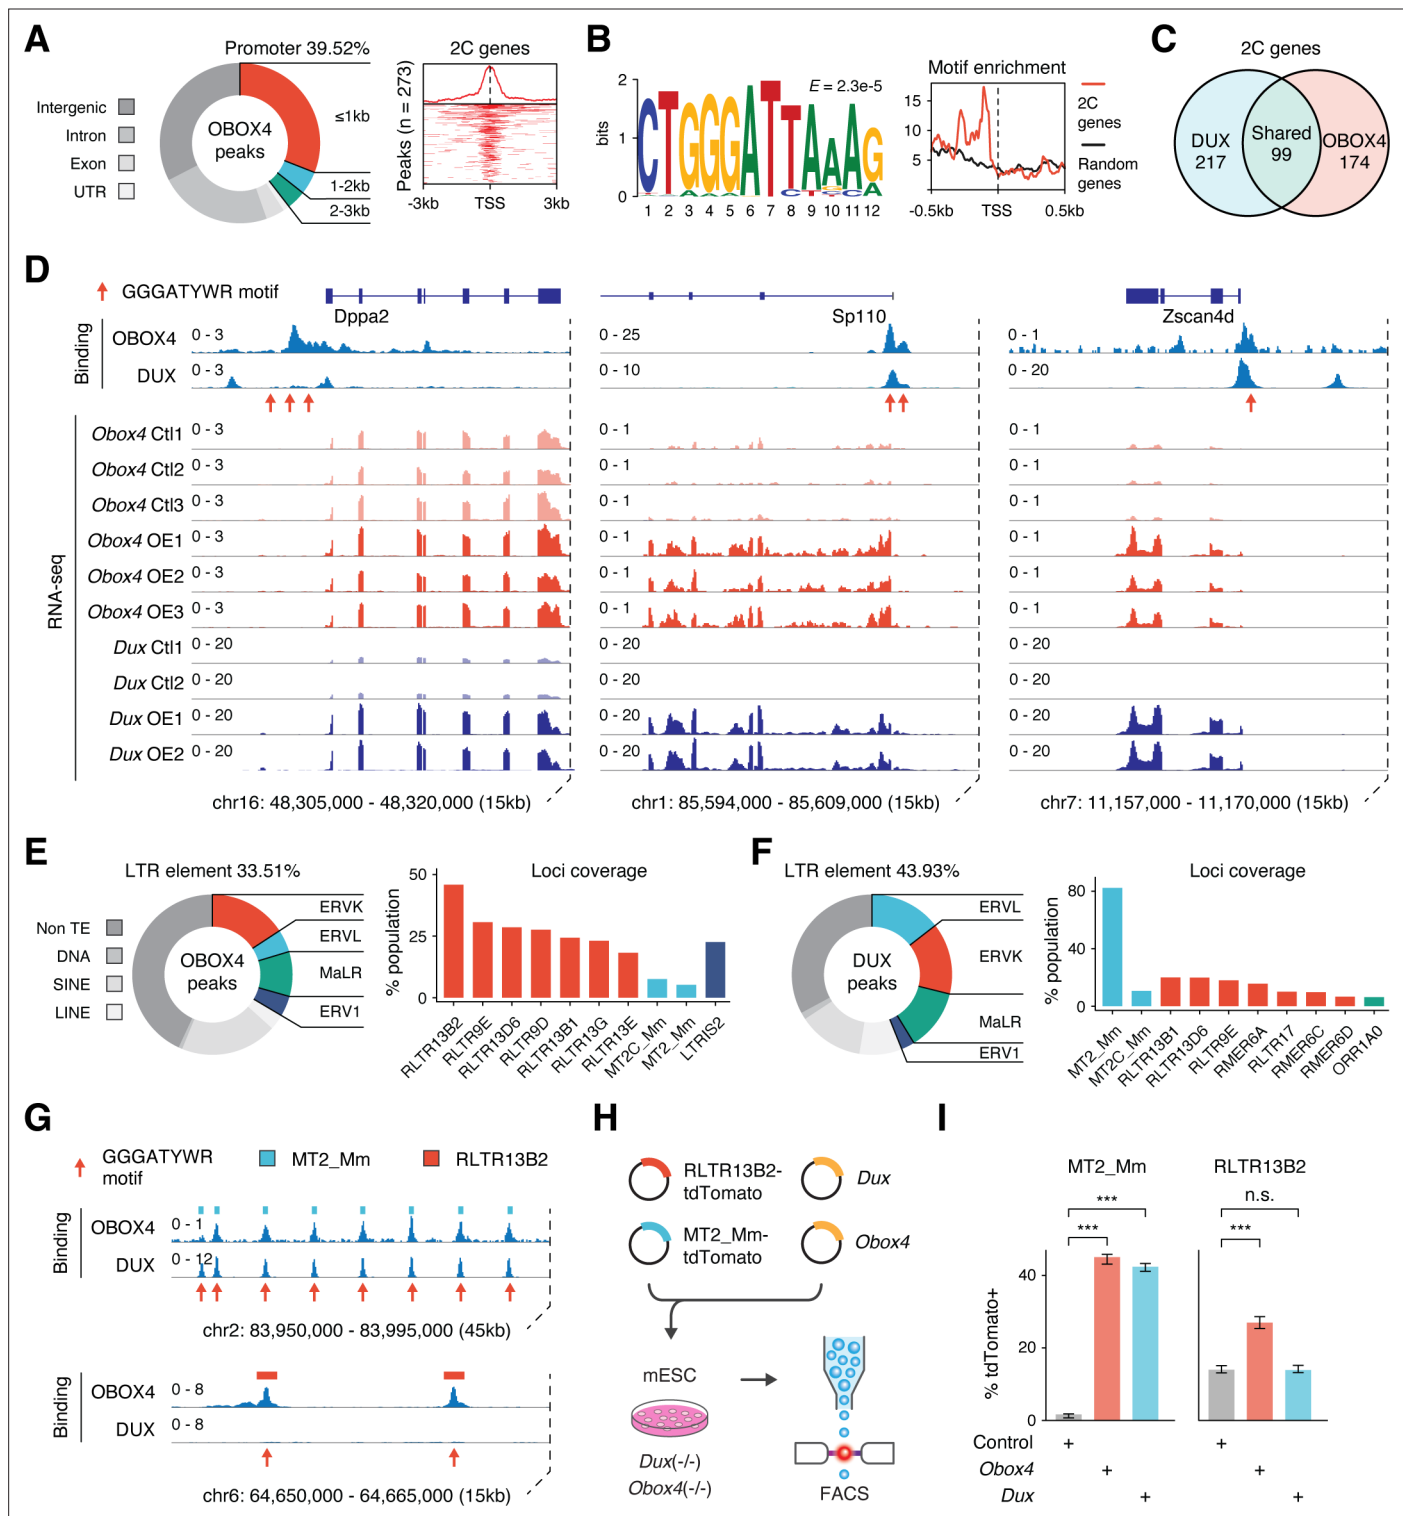

**Figure 3.** OBOX4 binds and activates 2C-specific long terminal repeat (LTR) elements. **(A)** Left panel: pie chart displaying proportions of annotated genomic regions of the OBOX4 binding sites. Right panel: heatmap showing the OBOX4 binding site distribution near 2C-gene promoters. **(B)** Left panel: the predicted OBOX4 binding motif using the top 500 cleavage under targets and release using nuclease (CUT&RUN) peaks. Right panel: histogram showing the distribution of the predicted OBOX4 binding motif near 2C and random gene promoters. **(C)** Venn diagram showing the distinct and overlapping 2C-genes targeted by DUX and OBOX4. **(D)** Representative genomic track showing DUX and OBOX4 binding sites at the *Dppa2*, *Sp110*, and *Zscan4d* loci and their expression levels in *Obox4* and *Dux*-induced mouse embryonic stem cells (mESCs). Read counts were CPM normalized. The OBOX4 binding sites overlapped with those of DUX. *Dppa2*, *Sp110*, and *Zscan4d* expression was upregulated upon *Obox4* and *Dux*. *Figure 3 continued on next page*

## Figure 3 continued

induction. **(E)** Left panel: pie chart displaying proportions of annotated transposable elements (TEs) of the OBOX4 binding sites. Right panel: bar plot showing the top 10 OBOX4 covered LTR elements. **(F)** Left panel: pie chart displaying proportions of annotated TEs of the DUX binding sites. Right panel: bar plot showing the top 10 DUX covered LTR elements. **(G)** Representative genomic track showing DUX and OBOX4 binding sites at MT2\_Mm and RLTR13B2. Read counts were CPM normalized. The OBOX4 binding sites overlapped with those of DUX at MT2\_Mm loci, while RLTR13B2 was uniquely bound by OBOX4. **(H)** Schematic design of the LTR::tdTomato reporter assay. Plasmids bearing a tdTomato ORF downstream of MT2\_Mm or RLTR13B2 were co-transfected with *Dux* or *Obox4* expression plasmids. Activation of LTR elements resulted in an increased red fluorescence-positive mESC population, which was measured using FACS. EGFP expression plasmid was co-transfected into the culture, following which the green fluorescence-positive population was measured, to normalize the transfection efficiency. **(I)** Bar plots showing the percentage of red fluorescence-positive mESCs upon expression of *Dux* or *Obox4*. Both *Dux* and *Obox4* activated MT2\_Mm, whereas only *Obox4* activated RLTR13B2.

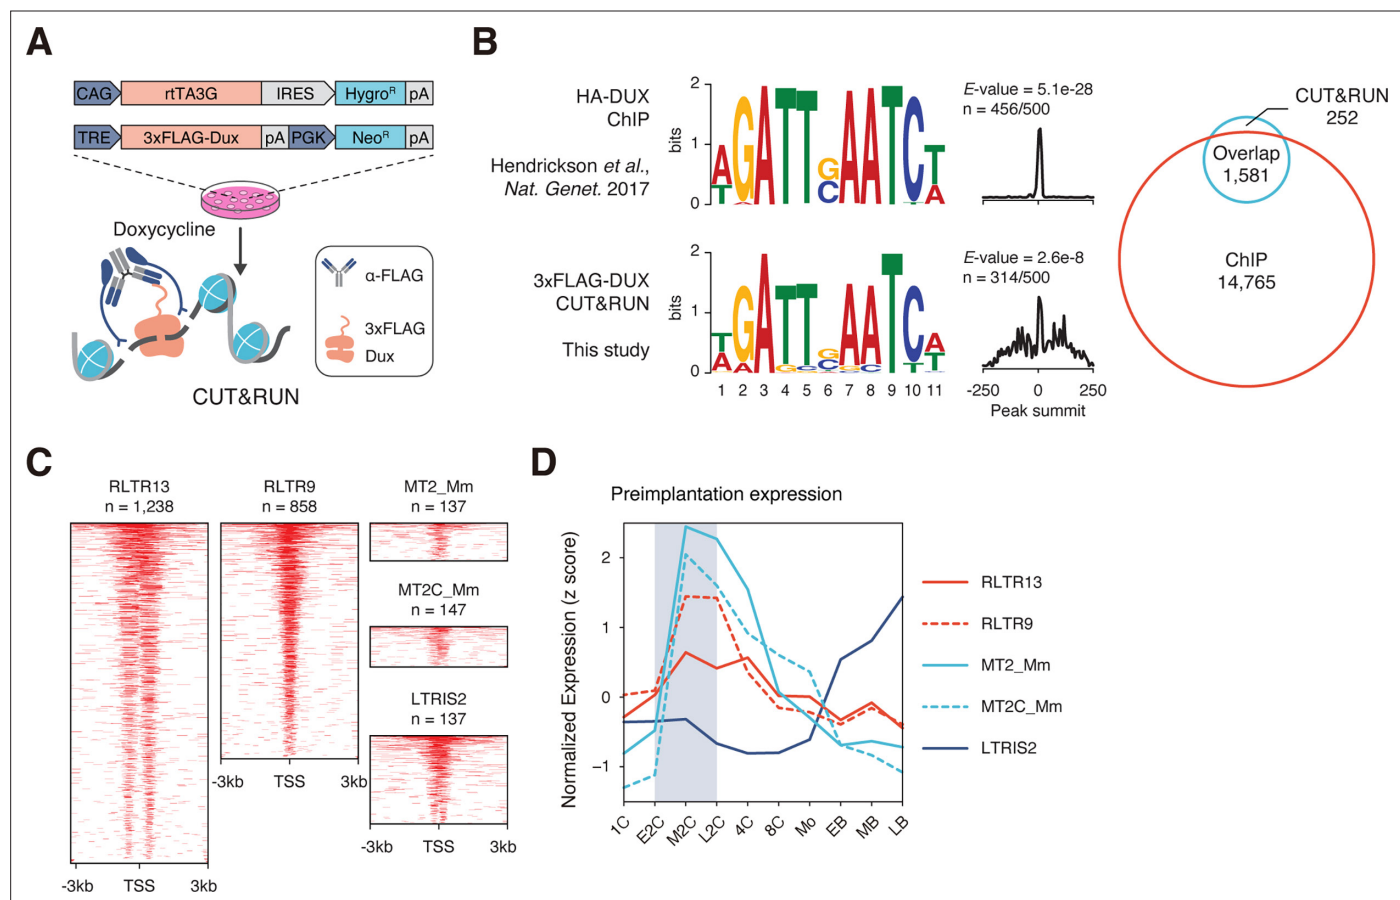

**Figure 3—figure supplement 1.** CUT&RUN captures DNA binding profiles of DUX and OBOX4. **(A)** Schematic diagram of the cleavage under targets and release using nuclease (CUT&RUN) workflow using mouse embryonic stem cells (mESCs) with induced expression of FLAG-tagged DUX. mESCs bearing a doxycycline-inducible 3xFLAG-DUX expression cassette were induced with doxycycline for 24 hr. DUX-associated DNA was pulled down in the CUT&RUN assay using a high-affinity anti-FLAG antibody. **(B)** Left panel: comparison of DUX binding motif predicted with published ChIP data and CUT&RUN result from this study. Right panel: overlap of DUX binding peaks discovered with the two data sets. **(C)** Heatmaps showing the OBOX4 binding site distribution near top covered long terminal repeat (LTR) elements. **(D)** Expression profile of top 5 OBOX4 covered LTR elements during embryogenesis.



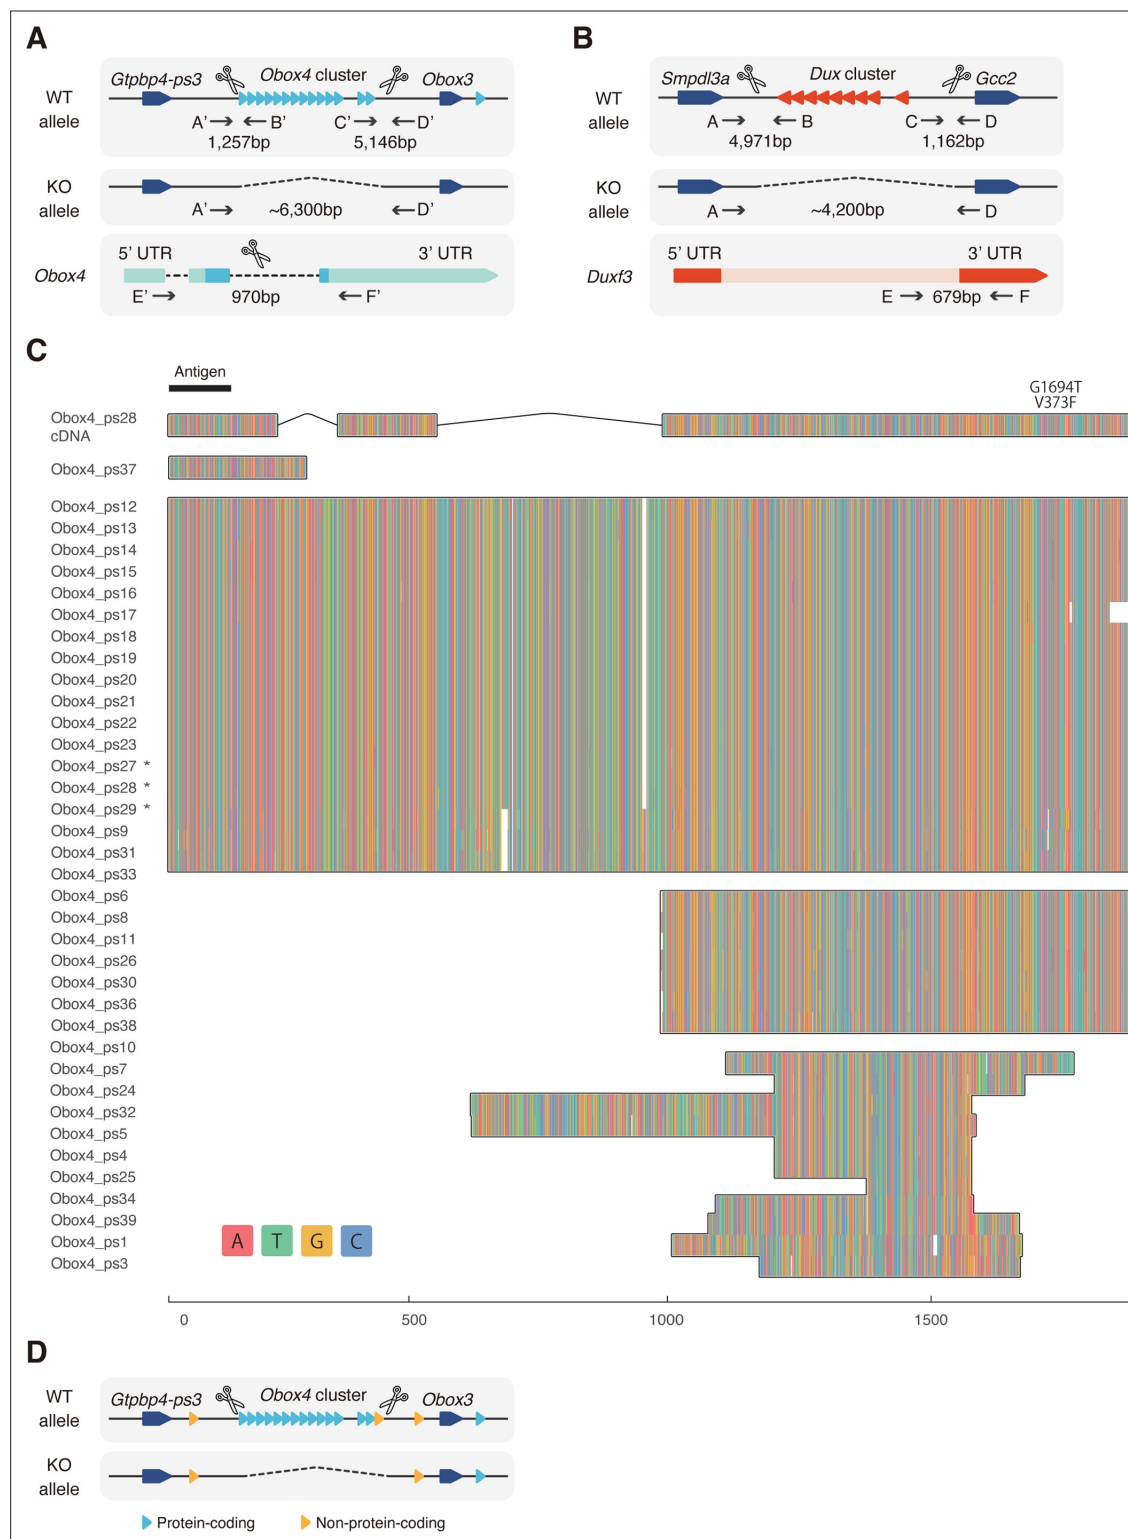

**Figure 3—figure supplement 2.** Knockout strategy of *Obox4* and *Dux* clusters. **(A)** Schematic diagram of producing *Obox4* knockout mice using CRISPR-Cas9 (not drawn to scale). sgRNAs flanking the *Obox4* cluster as well as the internal sequence of individual *Obox4* were introduced into mouse zygotes with SpCas9, to knockout *Obox4*. Primers flanking Cas9 cutting sites (A'–D') were designed to validate removal of target allele. Primers inside of *Obox4* (E'–F') were designed to quantify *Obox4* copy number by qPCR. **(B)** Schematic diagram of producing *Dux* knockout mice using CRISPR-Cas9 (not drawn to scale). Previously reported sgRNAs flanking the *Dux* cluster were introduced into mouse zygotes with SpCas9, to knockout *Dux*. Primers flanking Cas9 cutting sites (A–D) were used to validate removal of target allele. Primers inside of *Dux* (E–F) were designed to detect translocation of Figure 3—figure supplement 2 continued on next page

Figure 3—figure supplement 2 continued

*Dux* cluster. (C) Multiple sequence alignment of DNA sequence among the *Obox4* copies. Full-length *Obox4* with internal stop codons are marked by asterisks. (D) Schematic diagram of *Obox4* cluster removal strategy and copy number quantification. Primers E' and F' targets all 15 protein-coding as well as 3 non-protein-coding *Obox4* loci, among which 14 protein-coding and 1 non-protein-coding copies were subjected to knockout.



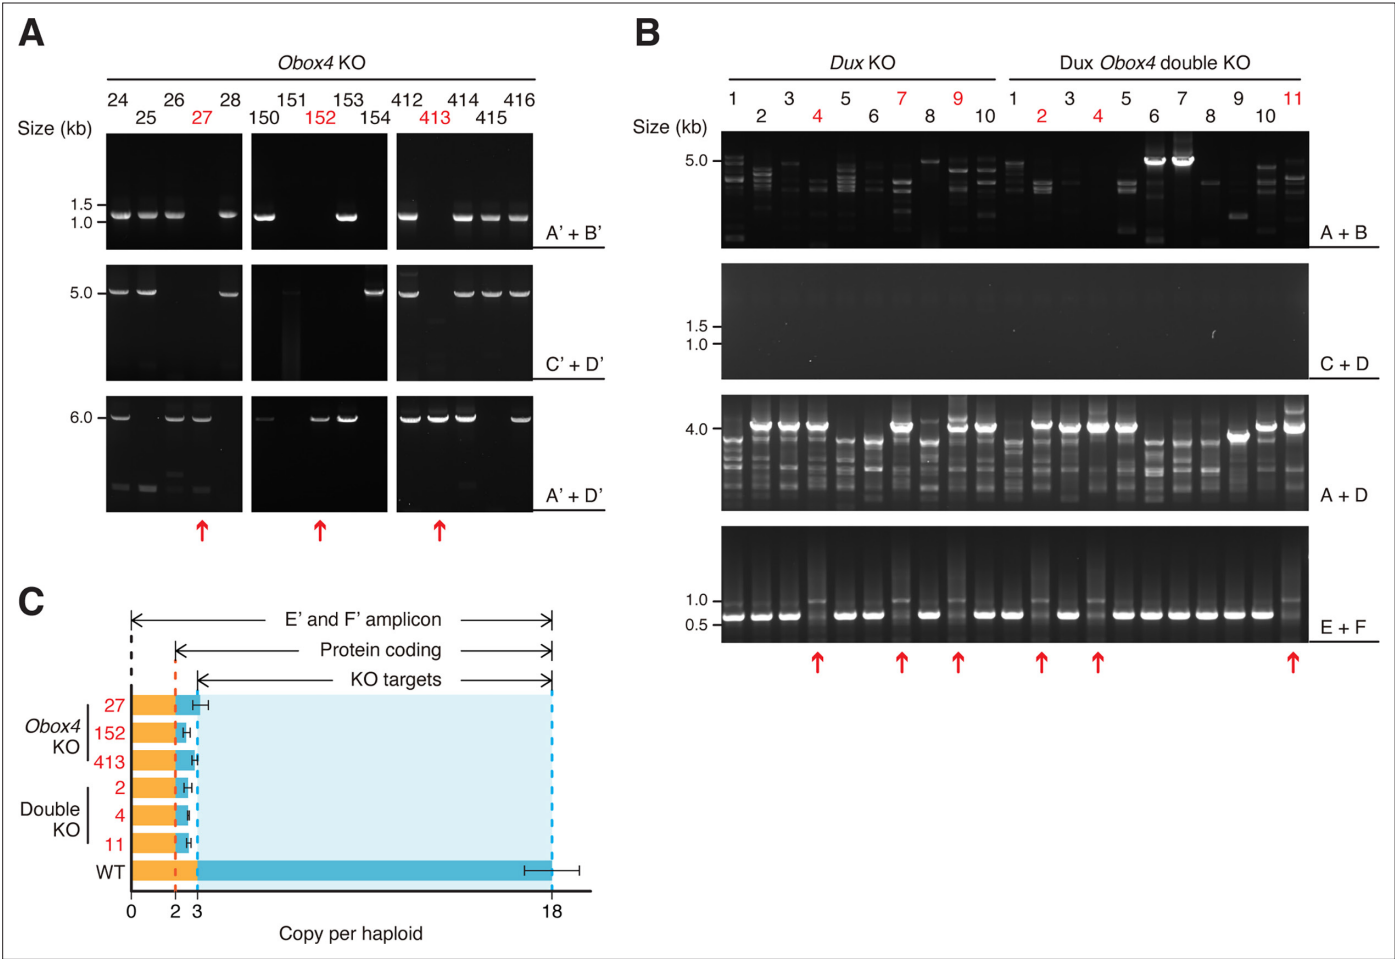

**Figure 3—figure supplement 3.** Validation of *Obox4* and *Dux* knockout mouse embryonic stem cell lines. **(A)** Agarose gel image of PCR-based genotyping of the *Obox4* knockout allele in founder mouse embryonic stem cell (mESC) lines. The red arrows indicate cell lines bearing biallelic deletions of the *Obox4* cluster. **(B)** Agarose gel image of PCR-based genotyping of the *Dux* knockout allele in founder mESC lines. The red arrows indicate cell lines without the genomic *Dux* sequences. **(C)** Bar plot showing copy number of *Obox4* in the founder mESC lines analyzed in **(A, B)**, as detected by qPCR using purified genomic DNA.

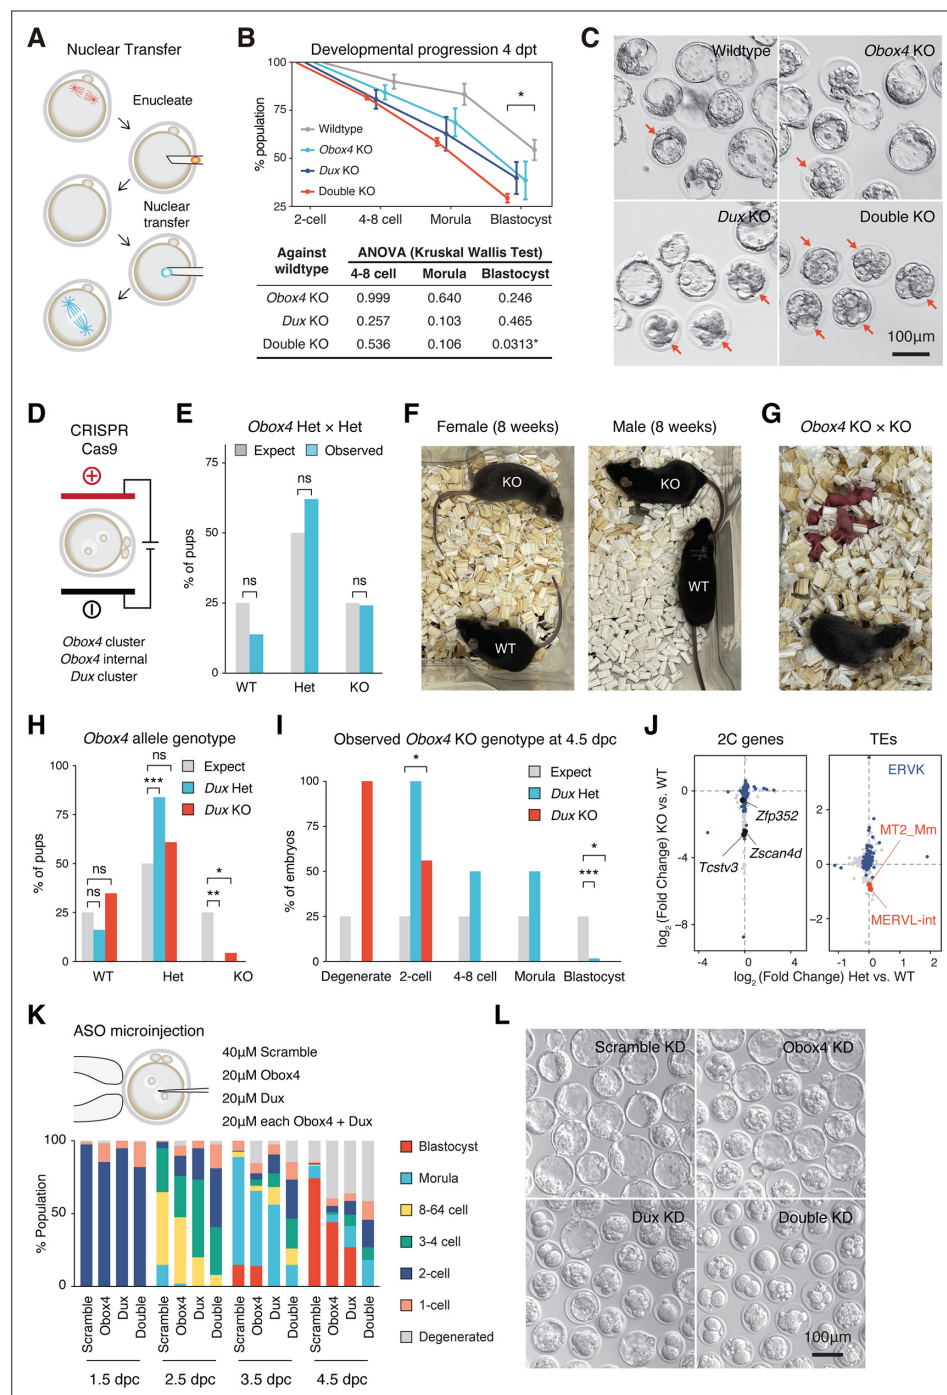

**Figure 4.** Concomitant loss of OBOX4 and DUX severely hinders zygotic genome activation (ZGA). **(A)** Schematic representation of the somatic cell nuclear transfer (SCNT) experiment. The nuclei of knockout mouse embryonic stem cells (mESCs) were transferred into enucleated oocytes to generate zygotes with knockout genotype. **(B)** Upper panel: percent SCNT embryos developed to different stages at 4 days post nuclear transfer (dpt). Lower panel: p-value of non-parametric ANOVA among different genotypes and stages compared to wildtype SCNT embryos. Three independent experiments were conducted, with 150–200 embryos per condition. **(C)** Representative picture of SCNT embryos at 4 dpt. Morphologically abnormal blastocysts are highlighted. Blastocysts generated by double knockout mESCs were severely defective. **(D)** Schematic representation of CRISPR-Cas9-mediated *Dux* and *Obox4* knockout mouse production. In vitro fertilized mouse zygotes were electroporated with pre-assembled CRISPR-Cas9 complex targeting *Dux* and *Obox4* loci. **(E)** Bar plot showing genotype percentage of the pups delivered by *Obox4*<sup>Het</sup> intercrosses. Four litters delivered 29 pups, litter size 7.25

Figure 4 continued on next page

Figure 4 continued

$\pm 1.26$ . ns p-value=0.9146, chi-square goodness-of-fit test. (F) Representative photos of *Obox4*<sup>KO</sup> and WT adult mice analyzed in (E). (G) Photo of *Obox4*<sup>KO</sup> intercross litter with live pups. (H) Bar plot showing genotype of *Obox4* allele in the pups delivered by crossing of *Dux*<sup>KO</sup>/*Obox4*<sup>Het</sup>  $\times$  *Dux*<sup>KO</sup>/*Obox4*<sup>Het</sup> or *Dux*<sup>KO</sup>/*Obox4*<sup>Het</sup>  $\times$  *Dux*<sup>Het</sup>/*Obox4*<sup>Het</sup>. Nine litters delivered 54 pups, *Dux* heterozygous and knockout allele were present in 31 and 23 pups, respectively. \*\*p-value=0.001306; \*p-value=0.02218; chi-square goodness-of-fit test. (I) Bar plot showing observed percentages of different preimplantation stage embryos bearing *Obox4* KO allele with *Dux* heterozygous or knockout allele at 4.5 days post coitum (dpc). Among the total 94 embryos assessed, 2 degenerated, 10 two-cell arrest, 2 4–8-cell arrest, 4 morula arrest embryos were observed at 4.5 dpc, whereas 76 developed to blastocyst. \*\*\*p-value=3.564  $\times 10^{-5}$ ; for two-cell; \* p-value=0.04348; for blastocyst \*p-value=0.02549; chi-square goodness-of-fit test. (J) Scatterplot showing expression log<sub>2</sub> fold changes of genes (left panel) and transposable elements (TEs) (right panel) in *Dux*<sup>KO</sup>/*Obox4*<sup>KO</sup> and *Dux*<sup>KO</sup>/*Obox4*<sup>Het</sup> versus *Dux*<sup>KO</sup>/*Obox4*<sup>WT</sup> 2C embryos. 2C-genes and ERVK elements targeted by OBOX4 are highlighted in blue. MT2\_Mm and MERVL-int are labeled. In total, 79 and 5 2C-genes were downregulated in *Dux*<sup>KO</sup>/*Obox4*<sup>KO</sup> and *Dux*<sup>KO</sup>/*Obox4*<sup>Het</sup> 2C embryos, respectively. (K) Upper panel: schematic representation of *Dux* and *Obox4* knockdown experiments in preimplantation embryos. Male pronuclei of zygotes were microinjected with antisense oligonucleotide (ASO) targeting *Dux* or *Obox4* transcripts. Lower panel: the percentages of embryonic stages observed at 1.5 dpc, 2.5 dpc, 3.5 dpc, and 4.5 dpc. (L) Representative picture of KD embryos at 4.5 dpc. No blastocyst was observed among double ASO knockdown embryos.

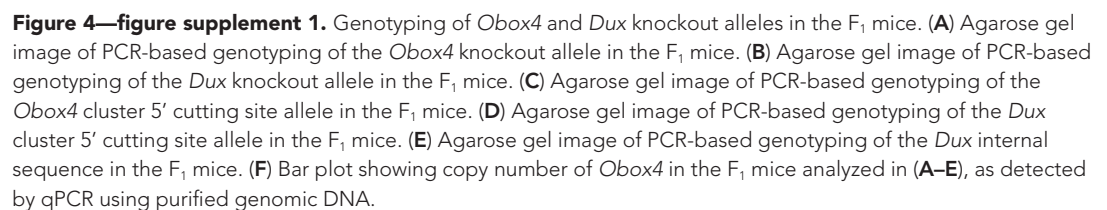

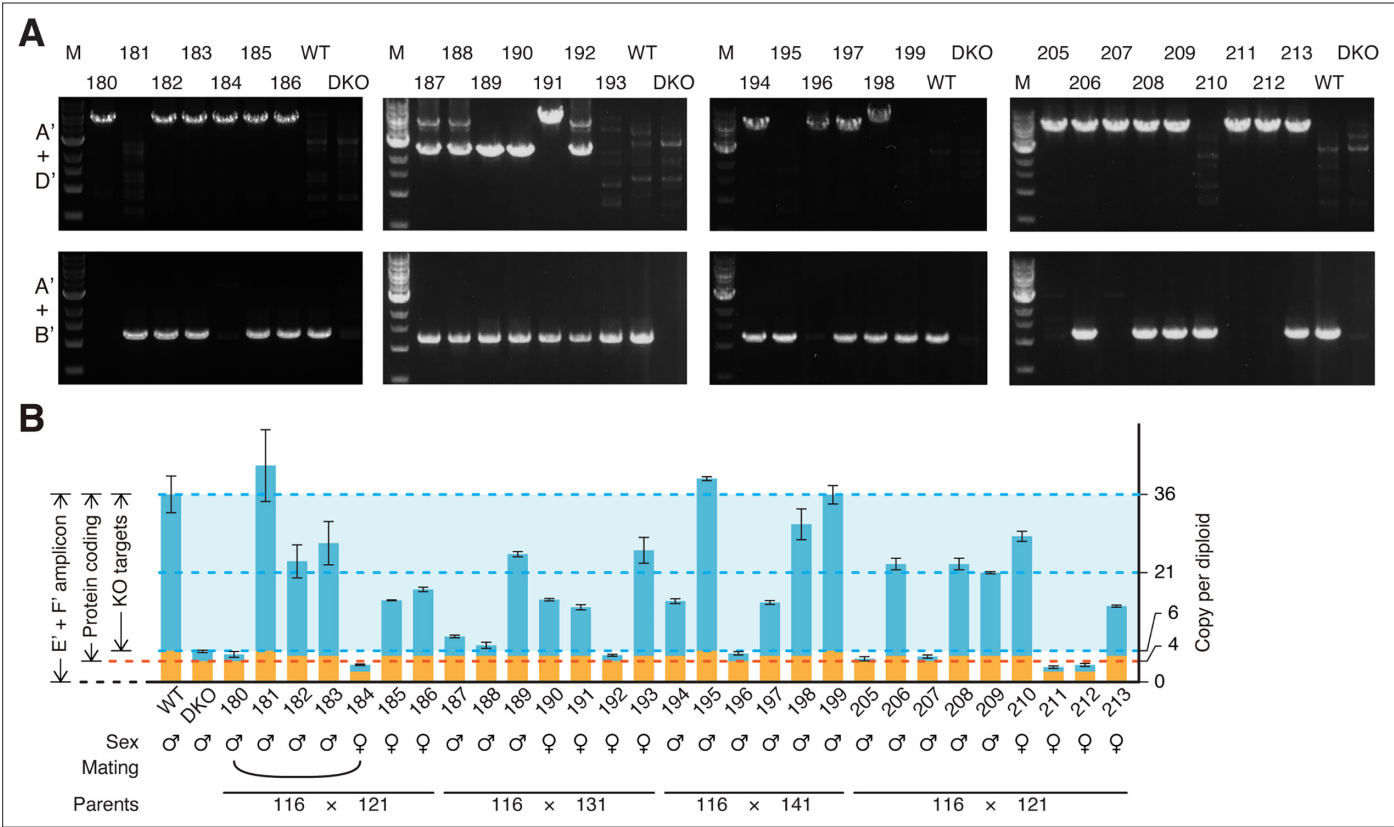

**Figure 4—figure supplement 2.** Genotyping of *Obox4* knockout allele in the  $F_2$  mice. **(A)** Agarose gel image of PCR-based genotyping of the *Obox4* knockout and *Obox4* cluster 5' cutting site wild-type allele in the  $F_2$  mice produced by intercrossing *Obox4*<sup>Het</sup>  $F_1$  mice. **(B)** Bar plot showing copy number of *Obox4* in the  $F_2$  mice analyzed in **(A)**, as detected by qPCR using purified genomic DNA.

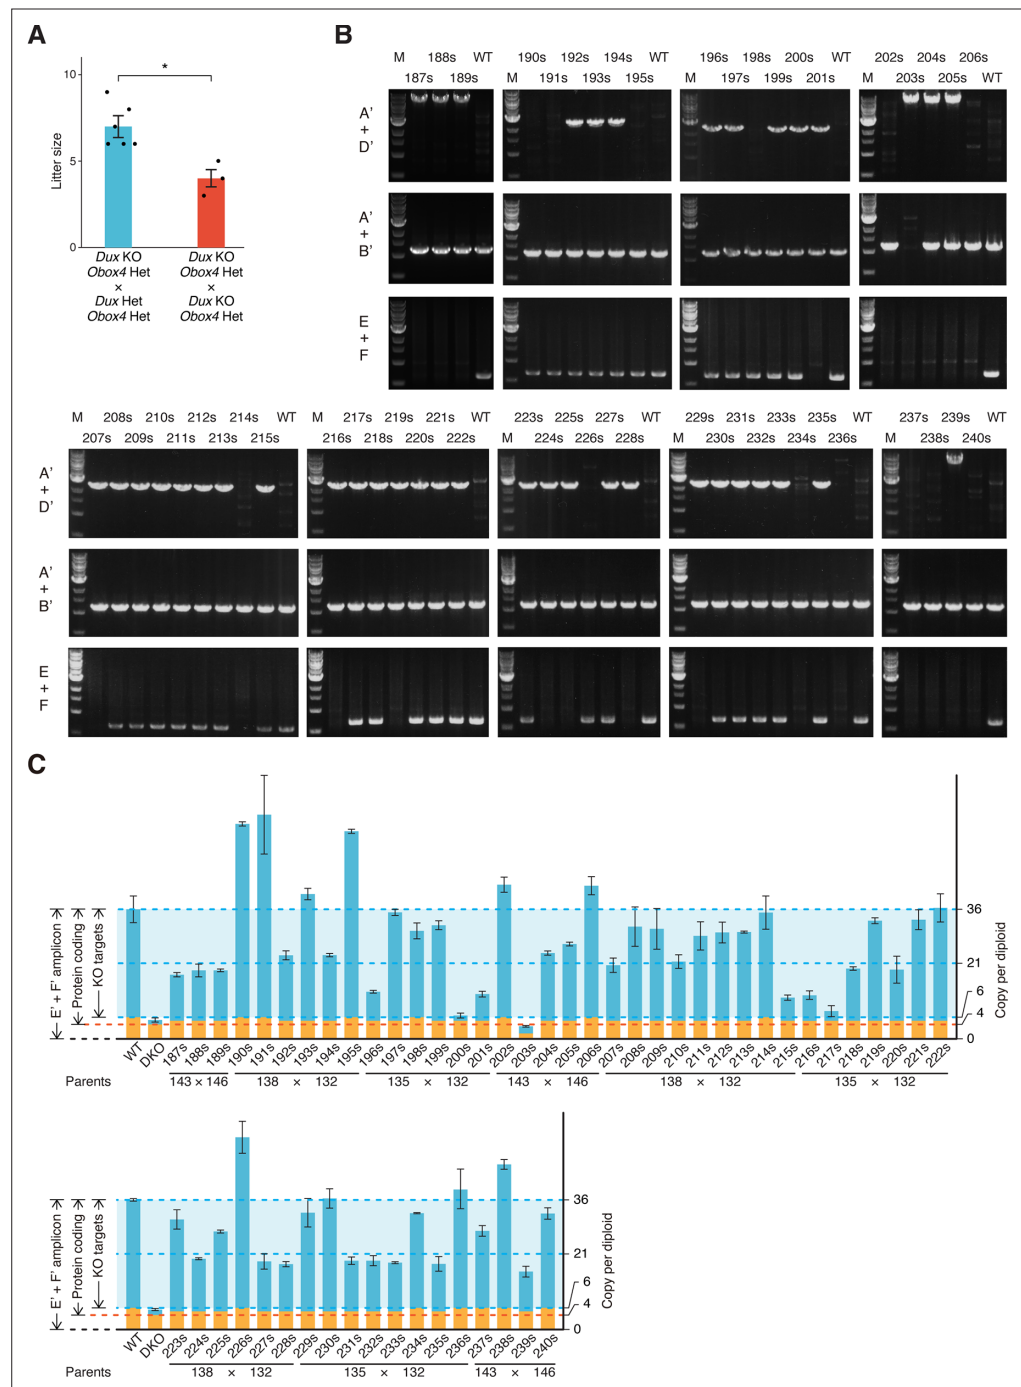

**Figure 4—figure supplement 3.** Genotyping of *Obox4* and *Dux* knockout alleles in the  $F_2$  mice. **(A)** Bar and dot plot showing litter sizes of intercross used to produce *Dux*/*Obox4* double knockout mice. Each dot represents individual litter size. Six and three litters were analyzed for  $Dux^{KO}/Obox4^{Htet} \times Dux^{Htet}/Obox4^{Htet}$  and  $Dux^{KO}/Obox4^{Htet} \times Dux^{KO}/Obox4^{Htet}$  mating, respectively. Crossing of  $Dux^{KO}/Obox4^{Htet} \times Dux^{KO}/Obox4^{Htet}$  delivered reduced litter size than those of  $Dux^{KO}/Obox4^{Htet} \times Dux^{Htet}/Obox4^{Htet}$ . \*p-value=0.01104, two-tailed Student's t-test. Error bars indicate standard deviations. **(B)** Agarose gel image of PCR-based genotyping of the *Obox4* knockout, *Obox4* cluster 5' cutting site allele, and *Dux* internal sequence in the  $F_2$  mice produced by intercrossing  $Dux^{KO}/Obox4^{Htet}$  and/or  $Dux^{Htet}/Obox4^{Htet}$   $F_1$  mice. **(C)** Bar plot showing copy number of *Obox4* in the  $F_2$  mice analyzed in **(A)**, as detected by qPCR using purified genomic DNA.



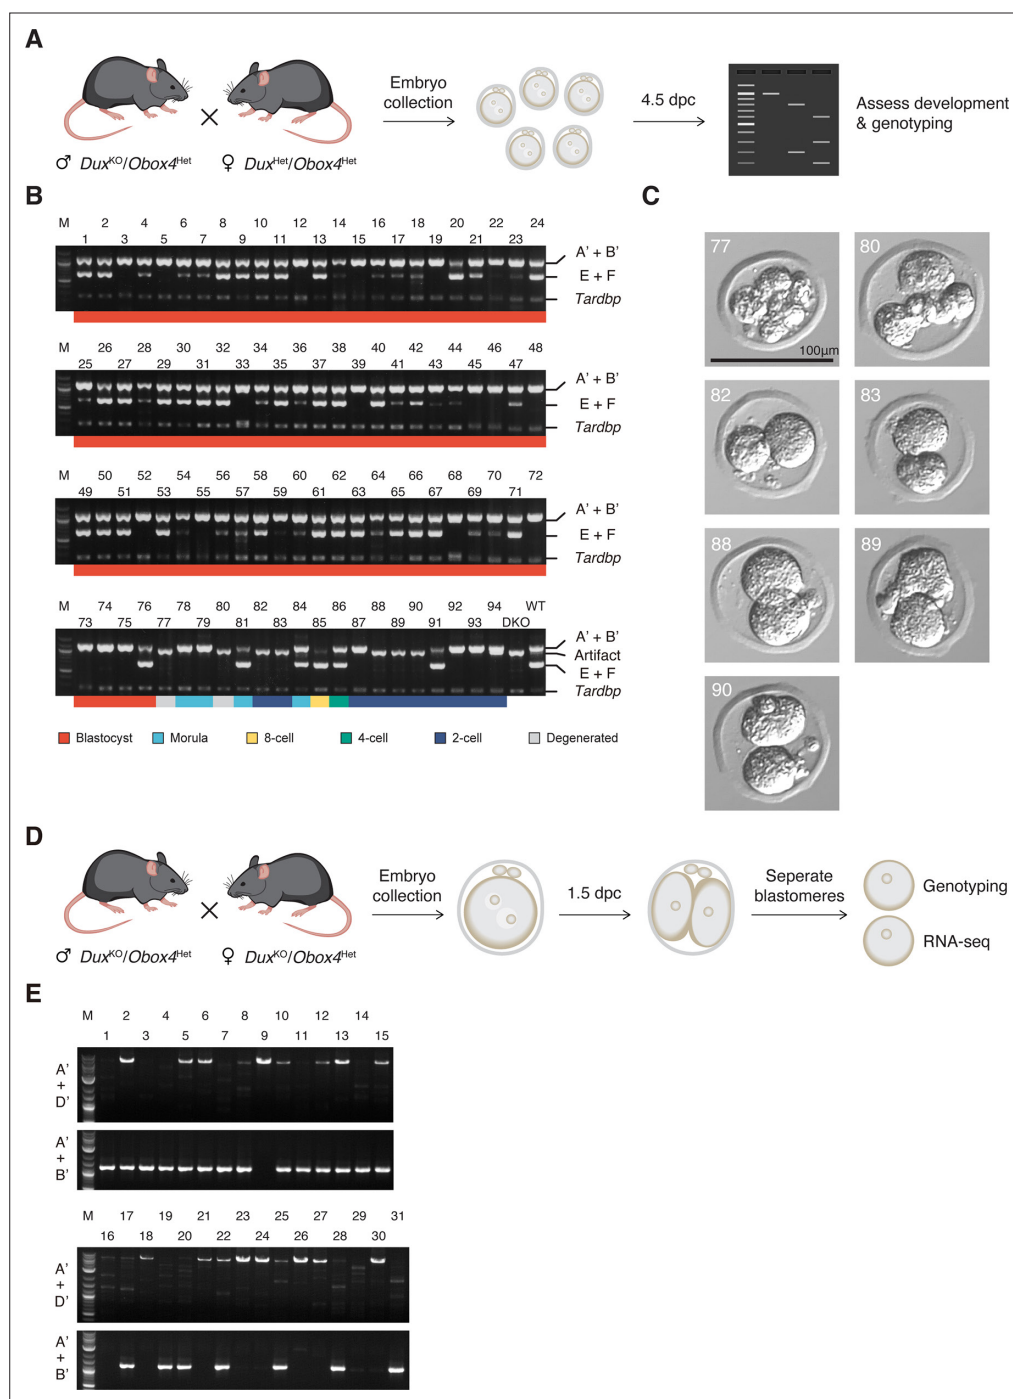

**Figure 4—figure supplement 4.** Genotyping of *Obox4* and *Dux* knockout alleles in the embryos. **(A)** Schematic diagram of knockout embryo production for development monitoring. *Dux<sup>Het</sup>/Obox4<sup>Het</sup>* female mice were mated with *Dux<sup>KO</sup>/Obox4<sup>Het</sup>* male mice. Embryos were collected at 0.5 days post coitum (dpc) and cultured in vitro until 4.5 dpc, followed by developmental assessment and genotyping. **(B)** Agarose gel image of multiplex PCR-based genotyping of *Obox4* cluster 5' cutting site allele, *Dux* internal sequence, and *Tardbp* internal sequence in the embryos produced by intercrossing *Dux<sup>KO</sup>/Obox4<sup>Het</sup>* and *Dux<sup>Het</sup>/Obox4<sup>Het</sup>* F<sub>1</sub> mice. Note that multiplexing three sets of PCR primers produced artifact band in *Dux<sup>KO</sup>/Obox4<sup>KO</sup>* embryos. **(C)** Representative pictures of *Dux<sup>KO</sup>/Obox4<sup>KO</sup>* embryos. **(D)** Schematic diagram of knockout embryo production for RNA-seq. Embryos were collected at 0.5 dpc from *Dux<sup>KO</sup>/Obox4<sup>Het</sup>* mating pairs and cultured in vitro until two-cell stage at 1.5 dpc, blastomeres of each embryo were separated and subject to genotyping and RNA-seq respectively. **(E)** Agarose gel image of genotyping of *Obox4* cluster 5' cutting site allele in the embryos produced by intercrossing *Dux<sup>KO</sup>/Obox4<sup>Het</sup>* mice.

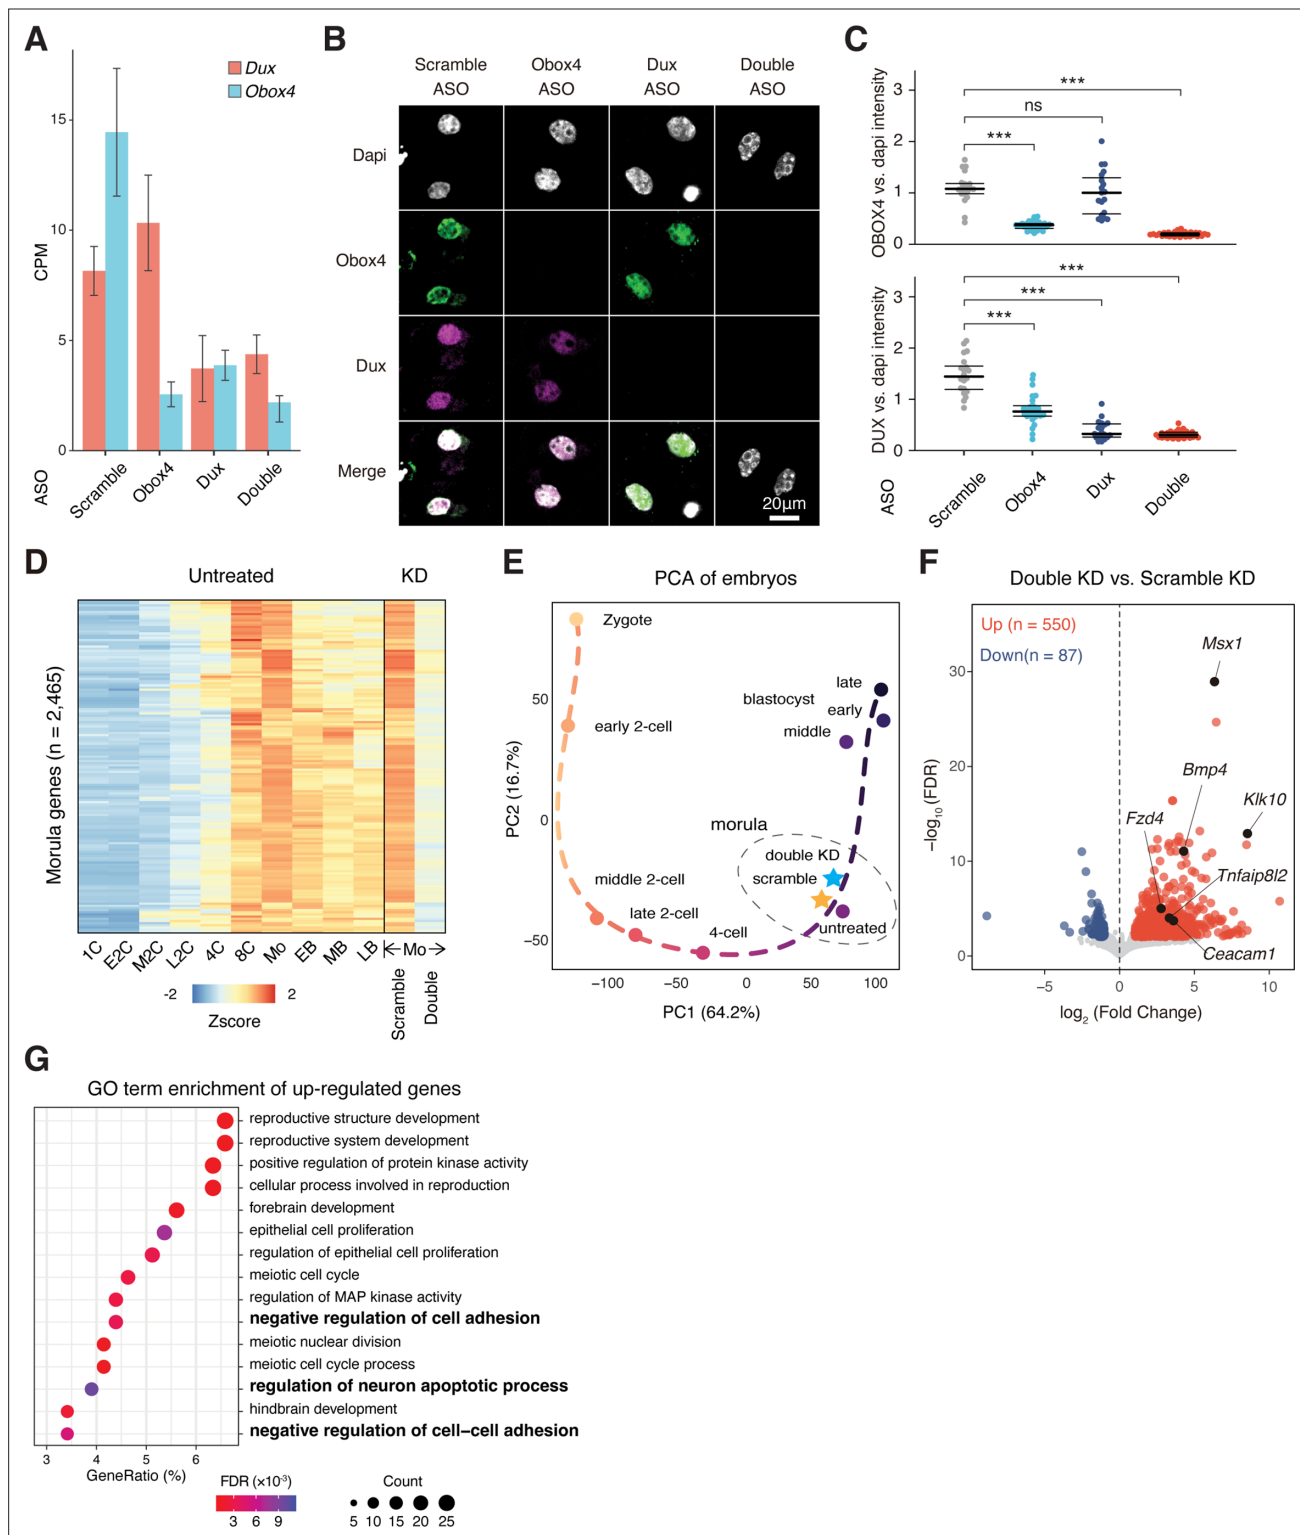

**Figure 4—figure supplement 5.** *Obox4/Dux* double knockdown embryos showed developmental defects. **(A)** Transcript levels of *Dux* and *Obox4* in antisense oligonucleotide (ASO)-injected embryos, as measured using RNA-seq. CPM, counts per million. **(B)** Representative images of immunofluorescence co-staining of OBOX4 and DUX in 2C embryos subjected to ASO-mediated knockdown. **(C)** Dot plots showing the per-nucleus intensity of OBOX4 and DUX normalized to DAPI. **(D)** Heatmaps of the expression of morula-genes in preimplantation embryos and knockdown morulae. Genes appeared in both scRNA-seq cluster 6 and bulk RNA-seq cluster 3 in **Supplementary file 1a** were designated as morula-genes. **(E)** Transcriptome-based PCA of knockdown morulae and preimplantation embryos. **(F)** Volcano plot of differentially expressed genes (DEGs) in double knockdown embryos. **(G)** GO term enrichment of up-regulated genes. *Figure 4—figure supplement 5 continued on next page*



Figure 4—figure supplement 5 continued

knockdown morulae compared with scramble knockdown. Selected apoptosis-associated genes are highlighted. **(G)** The enrichment of Gene Ontology (GO) terms of upregulated genes in double knockdown morulae.

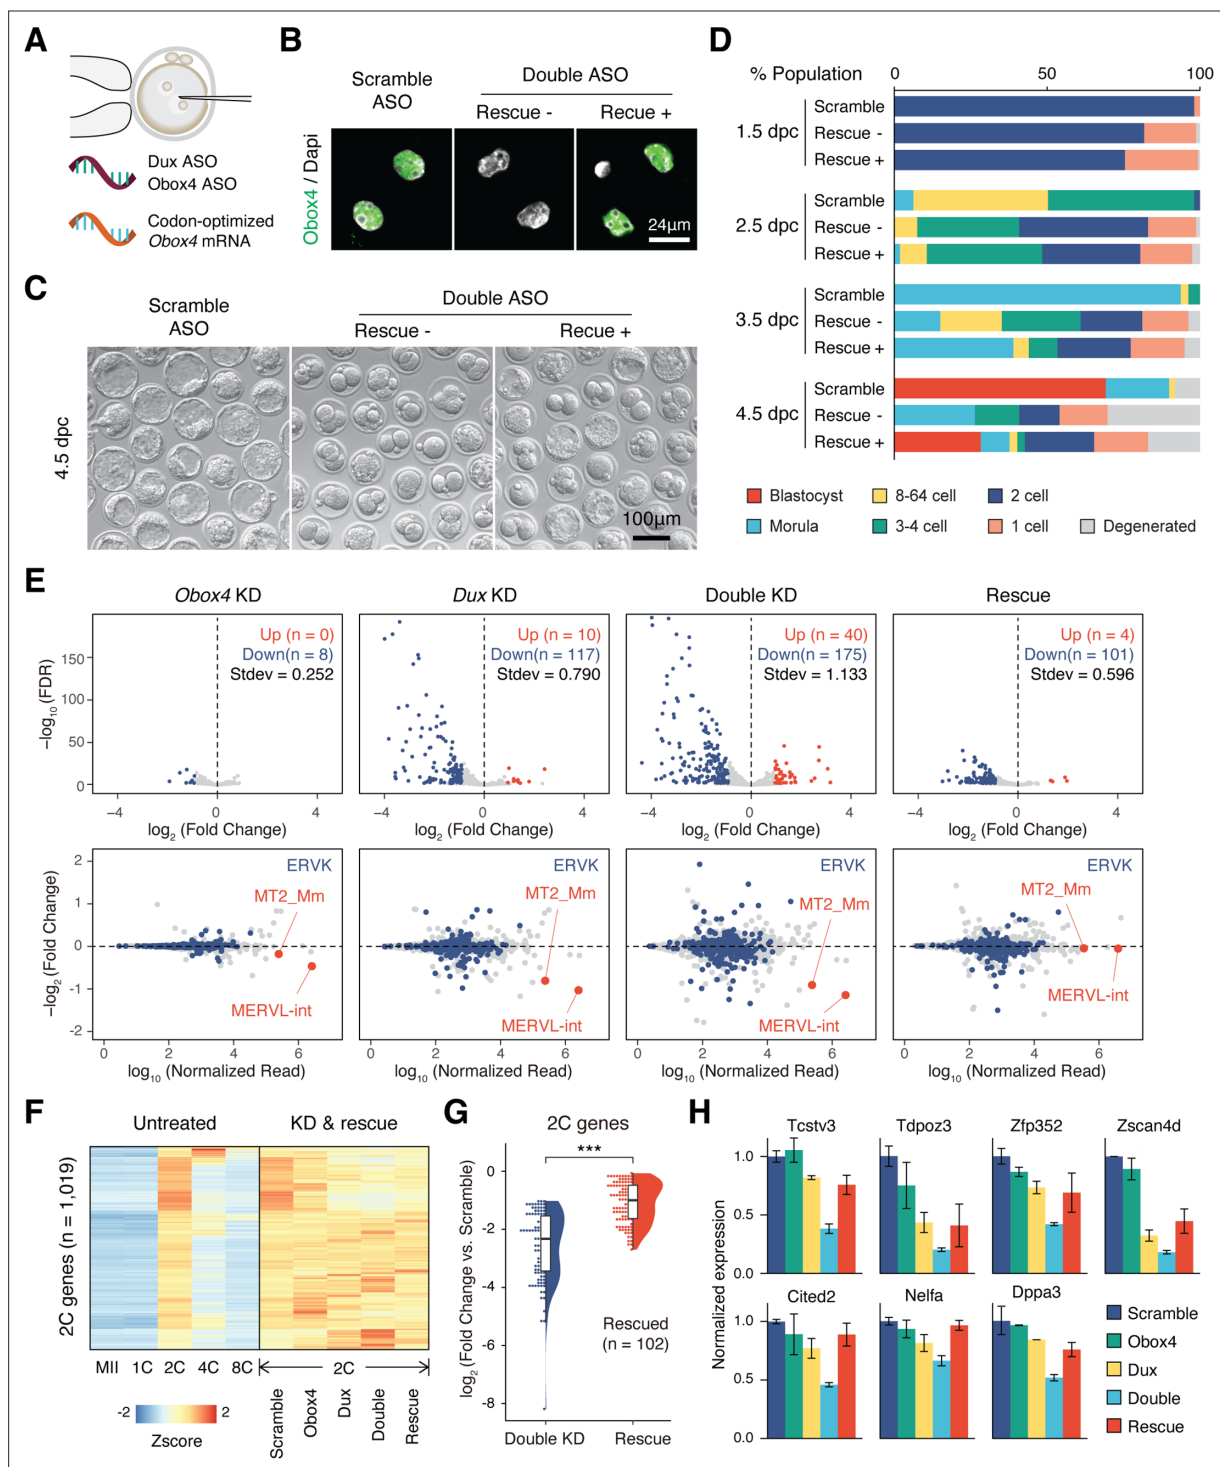

**Figure 5.** OBOX4 promotes zygotic genome activation (ZGA) in the absence of DUX. **(A)** Schematic of the double knockdown rescue experiment. Male pronuclei of zygotes were injected with antisense oligonucleotide (ASO) targeting *Obox4* and *Dux* transcripts as well as in vitro-transcribed codon-optimized *Obox4* mRNA. **(B)** Immunofluorescence staining of OBOX4 in early two-cell embryos microinjected with scrambled ASO, double ASO (*Obox4* and *Dux*), or double ASO with codon-optimized *Obox4* mRNA. **(C)** Representative picture of knockdown and rescue embryos at 4.5 days post coitum (dpc). Codon-optimized *Obox4* mRNA injection rescued blastocyst formation in ASO knockdown embryos. **(D)** The percentages of embryonic stages observed at 1.5 dpc, 2.5 dpc, 3.5 dpc, and 4.5 dpc. The plot represents the sum of three independent experiments, with 80–100 embryos per condition. **(E)** Upper panel: volcano plot showing the results of differentially expressed gene (DEG) analysis of 2C-genes in knockdown and rescue embryos compared to that in scramble ASO-injected embryos. Standard deviations of  $\log_2$ (fold-change) were used to represent the degree of transcriptome dysregulation. Stdev, standard deviation. Lower panel: MA plot of differential expression of transposable elements (TEs) in knockdown and rescue embryos.

Figure 5 continued on next page

*Figure 5 continued*

embryos compared to that in scramble ASO-injected embryos. MERVK elements and MERVL are highlighted. n = 3 biological replicates. **(F)** Heatmaps of the expression of 2C-genes in preimplantation embryos, knockdown 2C-embryos, and rescue 2C-embryos. **(G)** Rain plot displaying the expression change distribution of rescued 2C-genes in double knockdown and rescue 2C-embryos. **(H)** Bar plots showing the expression of representative 2C-genes in knockdown and rescue embryos; n = 3 biological replicates.

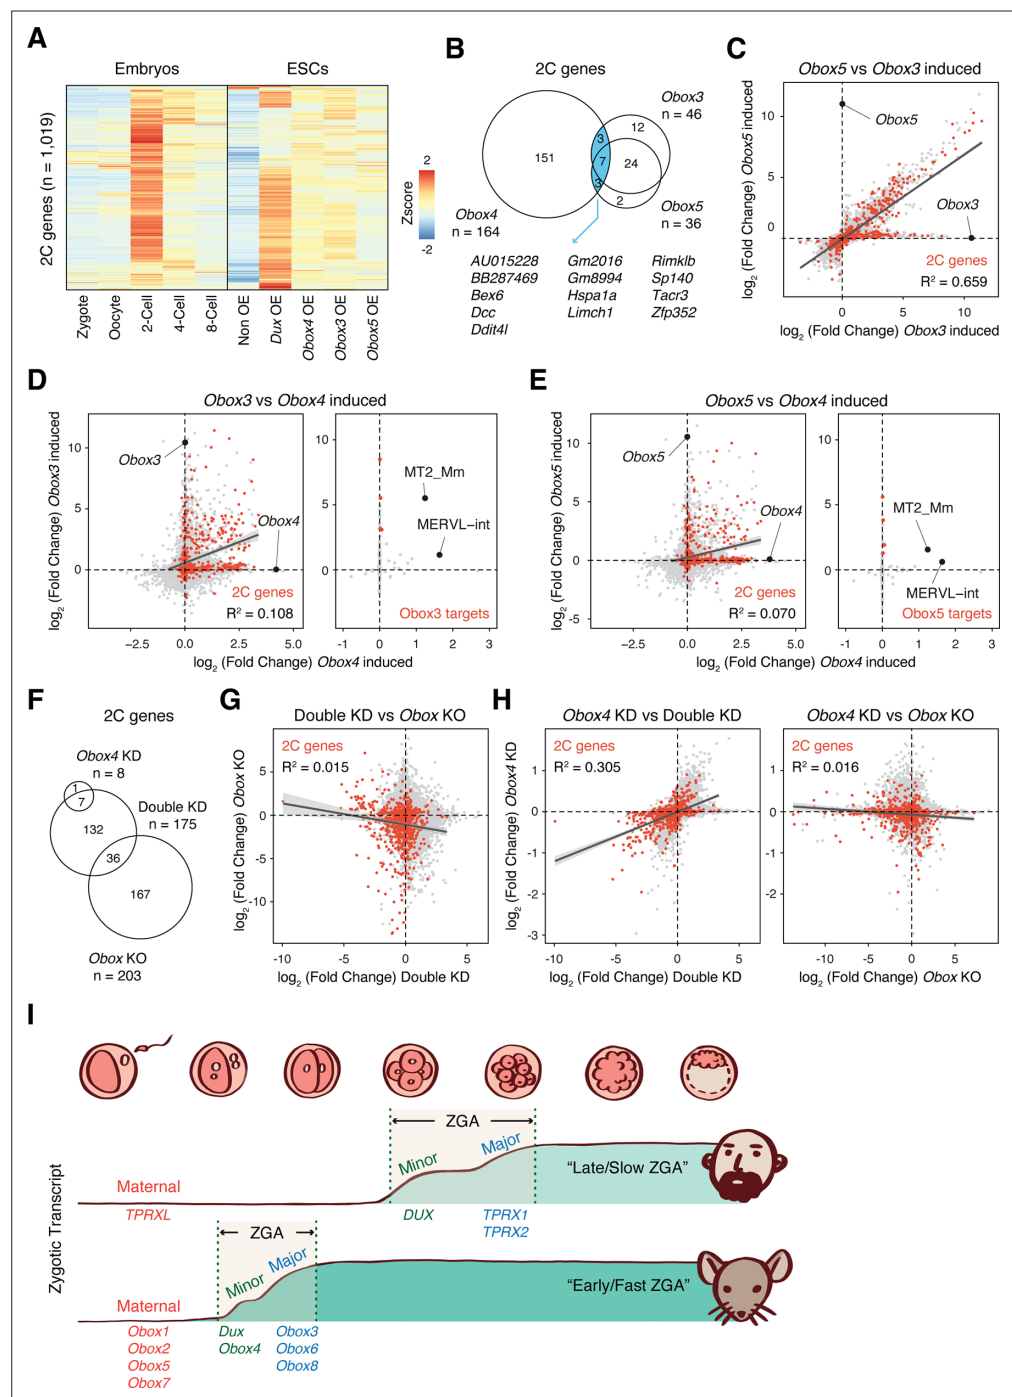

**Figure 6.** OBOX4-mediated DUX redundancy is distinct among the OBOX family. **(A)** Heatmaps of the expression of 2C-genes in preimplantation embryos, non-induced mouse embryonic stem cells (mESCs), and *Dux/Obox4/Obox3/Obox5*-induced mESCs. **(B)** Venn diagram showing overlap of 2C-genes induced by ectopic expression of *Obox3*, *Obox4*, and *Obox5* in mESCs. **(C)** Scatterplot showing per-gene expression changes in *Obox3* versus *Obox5*-induced mESCs. 2C-genes are highlighted in red. **(D)** Scatterplot showing per-gene (left panel) and per-transposable element (right panel) expression changes in *Obox3* and induced versus *Obox4*-induced mESCs. 2C-genes and *Obox3*-induced transposable elements (TEs) are highlighted in red. **(E)** Scatterplot showing per-gene (left panel) and per-transposable element (right panel) expression changes in *Obox5* and induced versus *Obox4*-induced mESCs. 2C-genes and *Obox3*-induced TEs are highlighted in red. **(F)** Venn diagram showing overlap of 2C-genes downregulated upon *Obox4* knockdown, *Dux/Obox4* double knockdown, and *Obox* maternal-zygotic knockout. **(G)** Scatterplot showing per-gene expression changes in *Obox* maternal-

Figure 6 continued on next page

*Figure 6 continued*

zygotic knockout versus *Dux/Obox4* double knockdown 2C embryos. 2C-genes are highlighted in red. **(H)** Scatterplot showing per-gene expression changes in *Obox4* knockdown versus *Dux/Obox4* double knockdown (left panel) and *Obox* maternal-zygotic knockout (right panel) 2C embryos. 2C-genes are highlighted in red. **(I)** Schematic model of different zygotic genome activation (ZGA) strategy employed by human and mouse. *Obox* family members with redundant functions are expressed in high dose at peri-ZGA stages to ensure rapid ZGA. *Obox4* evolved as a divergent *Obox* family member that provides functional redundancy to *Dux*.
