# Supplementary material for: Obox4 promotes zygotic genome activation upon loss of Dux
Source: eLife. 2024 Jun 24;13:e95856. doi: 10.7554/eLife.95856 (PMC11196112; doi:10.7554/eLife.95856)
Supplement: Supplementary file 1. [file elife-95856-supp1.xlsx]

## Sheet: Wu et al GSE66390
# Supplementary Table 1
# Preimplantation expression Z-score and k-means clustering Wu et al GSE66390
	RNA.1cell	RNA.early2cell	RNA.mid2cell	RNA.late2cell	RNA.4cell	RNA.8cell	RNA.16cell	RNA.earlyblast	RNA.midblast	RNA.lateblast	Cluster
ENSMUSG00000102693	-0.189067	0.410374	2.43065	0.966158	-0.189067	-0.189067	-0.189067	-0.189067	-0.188131	-0.189067	1
ENSMUSG00000064842	-0.101908	-0.101908	1.58174	0.249935	-0.101908	-0.101908	-0.101908	-0.101908	-0.101908	-0.101908	1
ENSMUSG00000051951	-0.123287	1.44032	0.749817	-0.0784513	-0.0965485	-0.107323	-0.11677	-0.0799452	-0.104359	-0.10453	2
ENSMUSG00000103377	-0.0883795	-0.0883795	-0.0883795	0.941649	-0.0883795	-0.0883795	-0.0566801	-0.0883795	-0.0883795	0.153686	3
ENSMUSG00000104017	-0.0999333	-0.0999333	-0.040685	1.06252	-0.0999333	-0.0797067	-0.0646796	-0.0254998	-0.0559705	-0.0999333	3
ENSMUSG00000103201	-0.0854008	-0.0854008	-0.0854008	1.68388	-0.0854008	-0.0854008	-0.0854008	-0.0854008	-0.0854008	-0.0854008	3
ENSMUSG00000103147	-0.294593	-0.128118	0.525685	0.308805	0.458921	0.193037	-0.214189	-0.0967551	-0.0244925	-0.284553	3
ENSMUSG00000103161	-0.179128	-0.179128	-0.154329	0.735842	0.0619796	-0.103814	0.0119783	-0.179128	0.191202	-0.179128	3
ENSMUSG00000102331	-0.169375	-0.169375	-0.0131781	0.947497	-0.162624	-0.0450162	-0.121264	-0.00696976	-0.103343	0.14526	3
ENSMUSG00000102343	-0.583339	-0.444793	-0.492504	-0.686824	-0.695752	-0.50365	-0.443702	0.339015	0.793412	0.799122	4
ENSMUSG00000025900	-0.249477	-0.126257	-0.0741011	-0.26661	0.69448	-0.0205139	-0.122251	0.02698	-0.104592	0.311741	4
ENSMUSG00000102948	-0.609781	-0.491112	-0.403166	-0.541637	-0.658128	0.880234	0.0786004	-0.483826	0.0847197	-0.202674	4
ENSMUSG00000025902	-0.159858	-0.173568	-0.193502	-0.153329	-0.194395	-0.194949	-0.194841	0.167848	0.104931	0.613394	4
ENSMUSG00000104238	-0.131368	-0.131368	-0.131368	1.22112	0.424518	0.0760278	-0.0752988	-0.131368	-0.131368	-0.131368	3
ENSMUSG00000102269	-0.548615	-0.541074	-0.540089	-0.524633	-0.493229	0.438121	-0.280511	-0.300947	0.647385	-0.17397	4
ENSMUSG00000096126	2.95998	-0.116769	-0.116769	0.426959	-0.116769	-0.116769	-0.116769	-0.116769	0.0741133	-0.116769	2
ENSMUSG00000104328	-0.110401	1.1534	-0.110401	-0.0544131	-0.110401	-0.110401	-0.110401	-0.110401	-0.00511053	0.310866	2
ENSMUSG00000102735	-0.30347	-0.336444	-0.203768	-0.330877	-0.308594	-0.141571	0.0985695	0.0912451	0.0441859	0.183054	4
ENSMUSG00000098104	-0.595847	-0.597698	-0.364571	-0.31986	-0.309566	1.06514	-0.0542232	-0.210145	-0.163352	-0.386664	4
ENSMUSG00000102175	0.345463	0.590595	2.23971	0.514834	0.57237	-0.224963	-0.155665	-0.542344	-0.00576906	-0.404901	1
ENSMUSG00000103265	-0.0710464	-0.0790746	-0.0218914	-0.0707655	-0.0767926	0.167223	-0.072722	-0.0685519	-0.0513897	-0.0635339	4
ENSMUSG00000103922	-1.46681	-1.48546	-1.0958	-1.09777	-0.886536	0.608192	0.424768	0.487416	-0.185294	-0.0191997	6
ENSMUSG00000033845	-2.07063	-2.05531	-1.98742	-1.34575	-0.250016	0.377512	0.960208	-0.00669878	0.119975	-0.217504	6
ENSMUSG00000102275	-0.303313	-0.282006	-0.267762	-0.0537724	-0.282891	-0.0918751	0.300208	0.0364234	-0.108663	0.0633281	4
ENSMUSG00000025903	-1.45196	-1.07945	-0.96237	-1.21679	-0.697165	0.350688	0.815823	-0.00896268	-0.132119	-0.0414278	6
ENSMUSG00000033813	0.667991	0.787132	0.879671	1.14441	1.10404	0.43052	-0.0863367	-0.616081	-0.555661	-0.443952	3
ENSMUSG00000062588	-1.15744	-0.884277	0.624213	1.40314	1.41948	0.34993	-0.109928	-0.115207	-0.265168	-0.900843	3
ENSMUSG00000103280	-0.147017	-0.147017	0.00312964	2.51463	0.000258695	-0.0731127	-0.147017	-0.147017	-0.119165	-0.147017	3
ENSMUSG00000002459	-0.0957089	0.0630274	-0.0181436	0.374716	-0.0913992	-0.0937327	-0.0921958	-0.0514323	0.0956102	-0.0971953	4
ENSMUSG00000091305	-0.379353	-0.379353	-0.187988	-0.21206	-0.264679	-0.0300852	-0.113705	0.273119	0.133264	0.137259	4
ENSMUSG00000102653	0.00259143	0.861591	0.771599	0.390766	-0.10842	-0.106256	-0.101604	-0.108131	-0.106775	-0.10842	2
ENSMUSG00000085623	-0.261901	-0.24136	-0.225402	-0.228868	-0.257905	0.691947	0.170833	-0.254387	-0.239671	-0.252206	4
ENSMUSG00000091665	-0.227307	-0.227307	1.33498	-0.0747086	-0.227307	-0.00627192	-0.117476	0.112508	-0.0826472	-0.110745	4
ENSMUSG00000033793	-0.897787	-1.01819	-1.25943	-1.16767	-0.57017	-0.58447	-0.271993	0.820097	0.806097	0.634117	6
ENSMUSG00000104352	0.129615	3.52923	0.13613	-0.122382	-0.149881	-0.138612	-0.147568	-0.145112	-0.138785	-0.142404	2
ENSMUSG00000104046	-0.392422	-0.362134	2.57785	2.52545	1.3477	-0.271962	-0.319764	-0.394864	-0.371653	-0.396345	1
ENSMUSG00000102907	-0.0706495	-0.0706495	-0.055921	1.08276	-0.0706495	-0.0706495	-0.0706495	-0.0706495	-0.0637959	-0.0706495	3
ENSMUSG00000025905	-0.135283	0.990074	1.58009	-0.0675956	-0.135283	-0.120643	-0.13105	-0.132572	-0.128061	-0.133003	1
ENSMUSG00000103936	-0.330332	-0.330332	2.38126	-0.244083	-0.330332	-0.000473358	-0.117775	-0.196837	-0.220637	0.281255	1
ENSMUSG00000093015	-0.137377	0.0853144	0.213106	3.6722	0.0690788	-0.198397	-0.198397	-0.198397	-0.198397	-0.198397	3
ENSMUSG00000103519	-0.406378	-0.406378	-0.406378	0.807018	0.360157	-0.0962957	-0.0958658	0.0248383	-0.0917532	0.403726	3
ENSMUSG00000033774	-0.0707565	-0.0707565	-0.0707565	0.994239	-0.0707565	-0.0551535	-0.0707565	-0.0707565	-0.0566051	-0.0707565	3
ENSMUSG00000025907	-0.159445	0.144266	1.09052	1.56081	1.64837	0.700732	0.457298	-1.00034	-0.926666	-0.952502	3
ENSMUSG00000090031	-0.434554	-0.42663	1.16025	1.04541	1.59845	0.190196	-0.301506	-0.393782	-0.323605	-0.181571	3
ENSMUSG00000087247	-0.108214	1.15531	0.666814	-0.0604932	0.335861	-0.108214	-0.108214	-0.108214	-0.108214	-0.108214	2
ENSMUSG00000103355	-0.712779	0.0654959	-0.284684	0.56845	0.643181	0.301373	0.330404	-0.427101	-0.534829	0.172546	3
ENSMUSG00000102706	-0.289235	-0.271817	0.0500568	-0.0876597	-0.050758	0.583637	0.177646	-0.281403	-0.273989	-0.256468	4
ENSMUSG00000103845	3.04188	3.10444	0.974915	0.357662	0.23678	0.0598546	-0.115944	-0.382227	-0.45204	-0.644839	5
ENSMUSG00000033740	-0.104674	0.135321	-0.129139	-0.023533	-0.125943	-0.117174	-0.128754	-0.129139	0.254178	0.0685383	4
ENSMUSG00000103329	-0.115147	-0.115147	-0.115147	-0.115147	-0.115147	0.0165356	-0.115147	-0.115147	0.257742	-0.115147	4
ENSMUSG00000104385	-0.563309	-0.590323	0.181199	-0.321458	-0.433703	-0.37222	-0.354579	0.018381	0.748679	0.32873	4
ENSMUSG00000102135	-1.92813	-2.02539	-1.39458	-0.989218	-0.17537	0.0920675	0.882944	0.26515	-0.178968	0.219582	6
ENSMUSG00000102534	0.129784	-0.0329163	-0.127222	-0.145525	-0.153011	-0.048211	-0.153011	-0.10721	0.0522749	0.503994	4
ENSMUSG00000102213	-0.13686	-0.13686	-0.13686	-0.13413	-0.13686	0.0830756	0.310095	-0.133187	-0.132735	-0.13686	4
ENSMUSG00000103629	-0.187746	-0.159249	1.03593	-0.187168	-0.120796	0.394464	-0.0365445	-0.180848	-0.267801	-0.0845962	4
ENSMUSG00000051285	-0.63543	-0.752163	-0.395816	-0.333961	-1.05806	-0.22816	-0.0762776	0.228769	0.608977	0.219179	4
ENSMUSG00000098201	-1.51094	-1.78826	-1.18892	-1.2136	-0.795619	0.17797	0.900206	0.286257	-0.185296	0.214105	6
ENSMUSG00000103509	-0.171079	-0.182516	-0.144692	-0.0602786	-0.162022	0.16851	-0.00839746	0.0917537	-0.0597551	-0.0609399	4
ENSMUSG00000048538	-0.903052	-0.925295	-0.930647	-0.912217	-0.844939	-0.526827	-0.314657	0.568539	1.11897	0.14214	6
ENSMUSG00000103709	-0.181692	-0.181692	1.13981	-0.0482378	-0.181692	-0.181692	-0.0409961	-0.181692	0.0397723	0.235103	4
ENSMUSG00000097797	-0.245965	-0.239533	-0.201386	-0.0388455	0.188003	-0.116656	-0.0143362	0.101147	0.0864641	-0.100428	4
ENSMUSG00000103498	1.23479	-0.0952311	-0.0952311	0.344583	-0.0952311	0.134206	-0.0952311	-0.0952311	-0.0952311	-0.0952311	2
ENSMUSG00000103067	-0.085561	-0.085561	-0.0633229	-0.0779685	-0.0840665	0.180282	-0.0791143	-0.0646376	-0.0523789	-0.0426331	4
ENSMUSG00000102320	-0.0835537	-0.204252	0.558652	-0.154725	-0.0512265	0.0658992	0.215627	-0.18262	-0.144697	-0.213415	4
ENSMUSG00000104226	0.323886	0.162891	0.697753	-0.0166474	0.250361	0.0717742	-0.0582189	-0.124491	-0.174793	-0.0441946	4
ENSMUSG00000103903	-0.759568	-0.741309	0.692275	0.173735	-0.623756	0.0324036	0.00752915	-0.0950987	0.197264	-0.056965	4
ENSMUSG00000025909	0.309582	0.0938214	0.209915	-0.0932966	-0.10083	-0.0855637	-0.103328	-0.104433	0.132832	-0.0867739	4
ENSMUSG00000102647	0.953131	-0.157053	0.536454	0.230306	-0.157053	0.110242	0.0379647	-0.157053	-0.127126	-0.157053	4
ENSMUSG00000086235	-0.268549	-0.153338	0.523227	1.17588	0.614817	-0.166884	0.141259	-0.0238308	-0.239436	-0.440155	3
ENSMUSG00000102253	-0.119953	-0.119953	0.563944	0.244942	-0.119953	0.110046	0.0274415	-0.119953	-0.119953	-0.119953	4
ENSMUSG00000093970	-0.0510304	0.113135	0.895164	0.929517	-0.123032	-0.123032	-0.123032	-0.123032	-0.0758122	-0.123032	3
ENSMUSG00000103884	-0.0822291	-0.0822291	-0.0822291	0.00431481	-0.0822291	-0.0822291	0.0130508	0.214307	-0.0822291	-0.0822291	4
ENSMUSG00000084353	0.630744	0.521544	0.816754	0.0481745	1.00296	0.64393	0.947539	-0.83647	-0.935357	-1.19648	2
ENSMUSG00000103933	-2.05906	-2.00538	-1.6445	-1.73002	-1.28406	-0.152963	0.168601	0.715896	0.539625	1.02708	6
ENSMUSG00000076135	-1.36612	-1.33773	-1.14462	-0.683331	-0.90661	-0.560388	-0.340636	0.727544	0.618038	1.401	6
ENSMUSG00000086195	-1.2962	-1.31469	-0.912761	-0.708186	0.0917366	0.660867	1.25556	-0.271355	-0.603617	-0.757728	6
ENSMUSG00000104504	-1.00661	-1.05278	-0.600995	-0.657826	-0.146578	0.666707	1.19331	-0.399877	-0.57715	-0.688525	6
ENSMUSG00000066693	-1.32114	-1.22123	-1.09303	-0.974517	-0.565988	0.880305	1.09622	-0.320069	-0.446266	-0.548758	6
ENSMUSG00000102316	-0.157569	-0.157569	0.905151	0.936087	-0.157569	0.0671835	-0.0318364	-0.157569	-0.157569	-0.157569	3
ENSMUSG00000103819	-0.118795	-0.118795	-0.118795	-0.118795	-0.118795	-0.118795	-0.0228085	-0.118795	0.0721258	0.481734	4
ENSMUSG00000102871	-0.0736258	-0.0736258	-0.0736258	-0.0603831	-0.0736258	-0.0736258	0.184481	-0.0736258	-0.0736258	-0.0736258	4
ENSMUSG00000101571	-1.33736	-1.09158	-0.543794	-1.09576	-0.43037	1.01047	0.259559	-0.0167819	-0.0609618	-0.66861	6
ENSMUSG00000104428	-0.149415	-0.149415	-0.149415	0.0654324	-0.149415	-0.0452088	0.140997	0.0640892	0.0258435	-0.149415	4
ENSMUSG00000102272	-0.636397	-0.628027	-0.636397	-0.531044	-0.227678	-0.101203	-0.0857841	0.259795	0.630485	-0.408423	4
ENSMUSG00000103411	0.0153941	-0.0666696	-0.0666696	-0.00209366	-0.0666696	0.162118	-0.0666696	-0.0666696	-0.0666696	-0.0666696	4
ENSMUSG00000061024	0.103305	0.0161681	0.80914	1.50744	0.412921	0.83281	-0.0855319	-0.560177	-0.618662	-0.484979	3
ENSMUSG00000025911	-0.00992038	0.404002	0.100183	0.0200462	-0.272633	-0.0563184	-0.156101	-0.17522	0.224429	0.148652	4
ENSMUSG00000079671	0.300906	-0.0947252	-0.037085	0.00308248	0.237318	0.0753437	-0.115782	-0.136982	0.0579742	-0.136982	4
ENSMUSG00000081441	-0.410428	-0.674968	-0.614747	-0.0621707	0.0493588	-0.291905	-0.444931	0.380909	0.540322	0.327146	4
ENSMUSG00000067879	1.28718	-0.107377	1.14391	-0.0722746	0.0184828	-0.107377	-0.107377	-0.107377	-0.105757	-0.107377	2
ENSMUSG00000099827	0.040447	-0.122763	-0.122763	-0.00425328	-0.122763	-0.0260172	0.0173433	0.333995	-0.122763	-0.122763	4
ENSMUSG00000025912	1.68699	2.21665	2.89764	1.51204	0.102966	-0.318039	-0.369595	-0.331198	-0.38789	-0.480101	5
ENSMUSG00000045210	1.35909	1.28136	-0.209872	1.33178	1.38087	-0.206228	-0.210185	-0.267141	-0.156264	-0.369608	2
ENSMUSG00000097893	-0.236398	-0.294199	-0.175131	-0.29923	0.00896484	-0.02053	-0.107363	0.306261	0.168319	-0.199781	4
ENSMUSG00000025915	-0.484381	-0.298302	0.612454	0.163651	0.273173	0.786042	0.927166	-0.864635	-0.801928	-0.73045	3
ENSMUSG00000046334	0.754107	0.706974	-0.922144	-1.23415	-0.742598	-0.646241	-0.174614	0.416	0.356713	1.21862	4
ENSMUSG00000088916	-0.0907658	-0.0907658	-0.0907658	-0.0832278	0.513347	-0.0811911	-0.0864662	0.206021	-0.0907658	-0.0907658	4
ENSMUSG00000046101	-0.217327	-0.217327	-0.215286	-0.139731	-0.0570009	0.00685602	-0.135868	0.109358	0.0571561	0.297123	4
ENSMUSG00000098234	-1.47216	-1.43301	-1.3641	-0.492038	0.287823	-0.141495	0.373703	0.0508116	0.290954	0.208551	6
ENSMUSG00000093178	-0.534776	-0.470831	-0.507532	0.295171	0.463365	-0.145791	-0.10814	-0.222364	0.577223	-0.360553	4
ENSMUSG00000099032	-0.371491	-0.371491	-0.269974	-0.295206	-0.213552	0.470655	0.374145	-0.15754	-0.308437	-0.169716	4
ENSMUSG00000104025	-0.154554	-0.154554	-0.0586393	-0.143228	-0.154554	0.0884671	0.346817	-0.154554	-0.154554	-0.154554	4
ENSMUSG00000025916	0.216384	1.35775	-0.0831308	-0.0688244	-0.13017	-0.11937	-0.0846299	0.167776	-0.12528	-0.0519235	2
ENSMUSG00000087199	-0.140154	-0.140154	-0.140154	-0.140154	-0.140154	0.247331	0.224841	-0.140154	-0.140154	-0.140154	4
ENSMUSG00000095780	-0.0868301	-0.0868301	-0.0868301	-0.079048	1.15326	-0.0868301	-0.0779428	-0.0868301	-0.0868301	-0.0868301	4
ENSMUSG00000025917	-1.89289	-1.86303	-2.06784	-1.895	-0.497594	0.123773	0.0913977	0.667069	0.469043	0.652111	6
ENSMUSG00000056763	-0.589318	-0.715927	-0.773885	-0.595109	-0.567501	-0.123957	-0.0532639	0.138322	0.584771	0.153703	6
ENSMUSG00000102356	-0.132633	-0.0619011	0.454039	-0.132633	-0.132633	0.031875	0.216542	-0.132633	-0.132633	-0.132633	4
ENSMUSG00000067851	1.29619	1.63101	2.35282	1.81568	-0.199338	-0.775348	-0.740528	0.0359141	0.0160768	0.301493	1
ENSMUSG00000088153	-0.121929	-0.121929	0.388016	-0.121929	-0.121929	0.10968	-0.121929	-0.0156991	0.0690508	-0.121929	4
ENSMUSG00000102556	-0.0818363	-0.0818363	-0.0818363	-0.0805432	-0.0818363	-0.0742725	-0.0818363	0.32496	-0.0648335	-0.0732348	4
ENSMUSG00000042501	0.486106	0.137881	1.67099	-0.095365	-0.130457	-0.124303	-0.104286	-0.118017	-0.097457	-0.0936776	1
ENSMUSG00000103810	-0.173068	-0.173068	0.557407	0.865884	-0.058733	-0.173068	-0.0307613	-0.173068	0.127215	-0.173068	3
ENSMUSG00000083422	-0.746091	-0.755213	-0.421662	-0.539824	-0.652371	0.933957	0.712503	-0.571812	-0.458553	-0.181538	4
ENSMUSG00000081417	-0.131839	-0.131839	-0.00691593	-0.0503362	-0.131839	-0.0551792	0.239546	-0.108351	-0.0818247	-0.0883496	4
ENSMUSG00000100212	-0.0957757	-0.0957757	-0.0957757	-0.0507232	0.692009	0.0872962	-0.0957757	-0.0894277	-0.0824062	-0.0957757	4
ENSMUSG00000100648	-0.844055	-0.788948	1.55761	0.0297122	-0.300663	0.118373	-0.0942427	-0.382199	0.213514	-0.162878	1
ENSMUSG00000048960	0.093208	0.470838	3.10976	1.90011	0.884005	-0.482783	-0.428296	-0.292982	-0.274149	-0.236886	1
ENSMUSG00000077318	-0.104773	-0.104773	0.142136	-0.0677586	-0.104773	0.055284	-0.104773	-0.104773	0.111201	-0.104773	4
ENSMUSG00000101827	-0.329685	-0.357525	2.02933	-0.305741	-0.394556	-0.353834	-0.399196	0.124735	0.265117	0.216611	1
ENSMUSG00000103494	-0.0981664	-0.0981664	0.743347	-0.0981664	0.0687294	-0.0981664	0.0025153	-0.0981664	-0.0459075	-0.0981664	4
ENSMUSG00000057715	2.93998	3.52457	0.916649	0.415298	-0.317865	-0.277345	-0.253124	-0.301556	-0.152547	-0.310914	5
ENSMUSG00000103825	-0.21426	1.04977	-0.106039	-0.156535	-0.217803	-0.0136288	0.00614093	-0.00902097	-0.103298	-0.00590047	4
ENSMUSG00000099845	-0.169041	-0.169041	-0.169041	0.154363	-0.169041	0.0252402	-0.119024	0.110022	-0.0575921	0.376341	4
ENSMUSG00000103561	-0.298242	-0.00946119	-0.0286289	0.0164075	-0.0545806	-0.215715	0.040747	-0.194388	0.344939	-0.0835928	4
ENSMUSG00000101610	-1.36886	-1.27505	-1.29324	-1.34111	-1.22468	-0.602125	0.136824	1.11572	0.456057	0.804092	6
ENSMUSG00000093864	-0.167653	-0.167653	-0.167653	0.0257537	-0.167653	-0.127389	-0.0295344	0.11711	0.0505321	0.272298	4
ENSMUSG00000097628	0.367053	0.134556	-0.0420557	-0.383639	-0.722427	-0.665357	-0.752828	0.307664	0.744895	1.20364	4
ENSMUSG00000098163	-0.105738	-0.428321	-0.169264	-0.32598	-0.428321	-0.393726	-0.420672	0.434663	0.404847	0.719129	4
ENSMUSG00000097171	-0.211934	1.51472	-0.211934	0.107507	-0.0116545	-0.192207	-0.132015	-0.128675	0.17571	-0.159334	2
ENSMUSG00000101314	-0.0702606	1.38512	-0.0422674	-0.0702606	-0.0702606	-0.0702606	-0.0702606	-0.0702606	-0.0702606	-0.0702606	2
ENSMUSG00000016918	0.00526502	-0.0216908	0.0305655	0.622151	-0.114258	-0.17105	-0.169828	0.233275	0.00328692	0.12816	4
ENSMUSG00000025938	1.42081	4.09073	1.07223	0.467861	-0.261246	-0.264026	-0.309427	-0.216928	-0.195953	-0.31031	5
ENSMUSG00000069620	-2.01927	-2.03731	-1.64945	-1.60518	-0.943205	0.243718	0.387138	0.346857	0.0558206	1.1914	6
ENSMUSG00000099498	-0.235717	-0.18888	-0.253911	0.324996	-0.162229	0.281487	-0.119617	-0.165642	0.0766467	-0.0130396	4
ENSMUSG00000042414	-0.485334	-0.461422	-0.0946333	0.853435	0.182315	-0.0148375	-0.116876	-0.124646	0.102679	0.040591	3
ENSMUSG00000005886	1.611	2.07305	2.54198	1.48745	0.561376	-0.403159	-0.55926	-0.175195	-0.327769	-0.30148	5
ENSMUSG00000103506	-0.16091	-0.17413	1.12841	0.621053	0.559162	-0.130149	-0.152024	-0.120065	-0.123676	-0.14394	3
ENSMUSG00000103495	-0.0893076	-0.0893076	0.420036	-0.0893076	-0.0893076	-0.0735248	-0.0889247	-0.0585987	0.101057	-0.0893076	4
ENSMUSG00000099183	-0.0950508	-0.0950508	-0.0950508	-0.0950508	-0.0950508	-0.0950508	-0.0950508	0.0646217	0.172229	-0.0950508	4
ENSMUSG00000102639	-0.0669553	-0.0669553	-0.0669553	-0.0393672	-0.0669553	-0.0669553	-0.0669553	0.229132	-0.0523347	-0.0669553	4
ENSMUSG00000104170	-0.0890374	-0.097196	0.745454	-0.0892566	-0.0787645	-0.0856964	-0.0941885	0.165053	-0.0866966	-0.0851448	4
ENSMUSG00000103085	-0.103042	-0.102775	-0.0979032	-0.0925479	-0.0965837	-0.00865955	-0.0792731	-0.10134	0.165883	-0.0764002	4
ENSMUSG00000102664	-0.226101	-0.232661	-0.0690731	-0.20608	-0.226027	-0.15333	-0.183958	0.357774	0.152403	0.188437	4
ENSMUSG00000101171	-0.789204	-0.881484	-0.330466	-0.565374	-0.660762	0.93777	0.00713604	-0.157704	-0.059634	-0.167395	4
ENSMUSG00000025935	0.850269	0.572023	-0.128944	-0.996616	-1.12562	0.324292	-0.0022312	0.259374	-0.400238	0.730478	2
ENSMUSG00000025937	-1.48734	-1.51686	-1.65352	-1.17117	-0.381296	0.079313	0.292226	0.506687	0.502309	-0.290601	6
ENSMUSG00000102982	-0.133712	-0.0757653	-0.205811	-0.218367	-0.219098	-0.228196	0.346355	-0.232629	0.291829	-0.248873	4
ENSMUSG00000067813	-0.289359	-0.290524	-0.290524	-0.282832	-0.172845	0.351827	0.579456	-0.290379	-0.29041	-0.290524	4
ENSMUSG00000097711	-0.517706	-0.55187	0.106023	-0.501054	-0.67385	-0.645985	-0.704708	0.298227	0.924349	1.00777	4
ENSMUSG00000102166	1.84406	2.47972	-0.113034	-0.113034	-0.113034	-0.113034	-0.113034	-0.113034	-0.113034	-0.111902	2
ENSMUSG00000104209	-0.131852	-0.131852	-0.131852	-0.0804971	-0.131852	0.193791	-0.131852	-0.131852	0.0561404	0.224525	4
ENSMUSG00000025932	3.35117	2.8109	1.5324	0.359694	-0.403993	-0.336152	-0.389158	-0.238413	-0.0956836	-0.199824	5
ENSMUSG00000095853	-0.181316	-0.181316	-0.181316	4.40599	-0.181316	-0.181316	-0.181316	-0.181316	-0.181316	-0.181316	3
ENSMUSG00000102588	-0.105424	1.20852	0.76603	-0.0997939	-0.105424	-0.084525	-0.105424	-0.105424	-0.105424	-0.105424	2
ENSMUSG00000054493	-0.179606	-0.134402	-0.20579	-0.20579	-0.20579	-0.20579	-0.124767	0.244387	0.110704	0.429946	4
ENSMUSG00000025930	-0.574243	-0.570042	-0.574243	-0.573361	-0.574003	-0.202115	0.432425	0.161051	0.14714	0.0631483	4
ENSMUSG00000103492	-0.124436	-0.0898137	0.909437	-0.00968124	-0.0124876	-0.0465896	-0.0644618	-0.0746377	-0.086315	-0.10423	4
ENSMUSG00000081201	-1.57042	-1.67564	-1.21547	-0.824109	0.11838	0.847905	1.22212	-0.467982	-0.577655	-0.459599	6
ENSMUSG00000082193	-2.33725	-2.34507	-2.26983	-1.73915	-0.707615	0.3987	0.84055	0.397783	-0.00957102	0.419083	6
ENSMUSG00000032769	2.76366	2.64599	0.163966	0.0720849	0.131601	-0.0255507	-0.229572	-0.191492	-0.22887	-0.229572	5
ENSMUSG00000073737	-0.537502	-0.512369	-0.300865	-0.296012	-0.616293	-0.640442	-0.658356	0.60291	0.518376	1.4405	4
ENSMUSG00000092083	6.24568	1.1254	0.00831755	-0.00688228	-0.149895	-0.162326	-0.16847	-0.164352	-0.141978	-0.160853	5
ENSMUSG00000104149	-0.0736996	-0.0736996	-0.0736996	0.14753	-0.0522177	-0.0736996	-0.0736996	0.222586	-0.0684282	-0.0736996	4
ENSMUSG00000101652	-1.3326	-1.37027	-1.26475	-0.918941	-0.616799	-0.427542	-0.252436	0.76914	0.457949	1.26274	6
ENSMUSG00000100814	-0.256425	-0.474717	1.05107	-0.0199602	-0.409602	-0.114591	-0.248342	0.125941	-0.0426764	0.565982	4
ENSMUSG00000025925	-0.065917	-1.30109	-0.19582	0.902911	-0.613299	0.685571	0.256917	-0.398954	-0.190072	-0.283061	3
ENSMUSG00000104379	-0.161133	-0.153439	0.221239	0.528545	-0.161133	-0.161133	0.17739	0.0218805	-0.094834	-0.138086	4
ENSMUSG00000032719	-0.158025	-0.0830073	-0.153083	0.0982655	0.0451846	-0.0464604	0.0272645	0.0202156	0.10008	-0.158025	4
ENSMUSG00000100652	-0.773075	-0.881097	-0.672857	-0.455223	-0.415641	0.160521	0.0167547	-0.107331	0.17138	0.6355	6
ENSMUSG00000067795	-0.134072	-0.282582	-0.596002	-0.124698	0.931408	0.469705	0.180365	-0.0378404	-0.215414	-0.784397	4
ENSMUSG00000043716	-2.84291	-2.87585	-2.24403	-1.25855	-0.404462	0.0969386	0.569432	0.611624	0.274836	0.47735	6
ENSMUSG00000025921	-0.0221434	-0.177366	0.427639	0.152563	0.72263	1.21588	0.349992	-0.572693	-0.793146	-1.03153	3
ENSMUSG00000104165	-0.152295	-0.152295	0.202932	0.919821	0.57814	-0.0940281	0.0591971	-0.152295	-0.152295	-0.152295	3
ENSMUSG00000025920	2.74812	2.29066	1.87671	0.27939	-0.417425	-0.27374	-0.32552	-0.258391	-0.0444097	-0.388694	5
ENSMUSG00000089982	1.68134	-0.124339	-0.124339	-0.124339	-0.124339	-0.124339	-0.124339	0.076623	0.00816276	0.297508	2
ENSMUSG00000025939	2.77115	1.98148	1.42998	0.611798	-0.0899734	-0.463696	-0.374642	0.00574363	0.00154121	-0.420699	5
ENSMUSG00000102457	-0.0885371	0.099885	2.58305	1.14329	-0.0073264	-0.054157	-0.256549	-0.229169	-0.251872	-0.267523	1
ENSMUSG00000079658	-2.42218	-2.41	-0.865464	-0.142142	-0.0517223	0.754648	1.2071	-0.208258	-0.554407	-0.649794	6
ENSMUSG00000097744	-0.0853164	-0.203966	-0.0332806	0.132395	0.317213	0.153428	0.148495	-0.19126	-0.197379	-0.135418	4
ENSMUSG00000100959	-0.0683704	-0.113064	-0.0147593	0.823896	0.550263	0.00690569	-0.0975748	-0.125739	-0.121887	-0.105789	3
ENSMUSG00000025940	-1.30873	-1.33375	-0.815198	-0.2559	1.02643	0.447925	-0.203537	-0.0452139	0.294769	-0.405876	6
ENSMUSG00000025779	-0.121236	0.278824	-0.583762	-0.499019	-0.141994	0.442334	0.442964	-0.244879	-0.115886	-0.621061	4
ENSMUSG00000100093	-1.00134	-1.03187	0.355299	-0.473896	-0.557427	0.015626	0.244617	0.196634	0.0973977	-0.176099	4
ENSMUSG00000091020	-1.11985	-1.17463	0.519689	0.862991	0.575248	0.432092	0.0341653	-0.221969	-0.15663	-0.579797	3
ENSMUSG00000101640	-0.379236	-0.374179	2.44838	2.46089	0.51413	-0.215761	-0.239501	-0.290056	-0.361164	-0.258533	1
ENSMUSG00000104133	0.0147864	-0.0922932	0.674866	0.98867	-0.0922932	-0.0922932	-0.0922932	-0.0922932	-0.0922932	-0.0922932	3
ENSMUSG00000042686	0.547721	0.942215	-0.105196	-0.304895	0.372043	-0.0870195	-0.0605473	0.210616	-0.0405626	-0.365867	2
ENSMUSG00000025777	2.283	2.47624	2.64707	2.1989	0.506185	-0.401446	-0.431968	-0.457031	-0.458052	-0.446021	5
ENSMUSG00000099899	2.68469	2.0954	3.34382	0.203965	-0.31717	-0.317851	-0.318455	-0.318559	-0.3179	-0.318297	5
ENSMUSG00000100398	-0.759695	-0.787574	-0.692306	-0.567857	-0.0593646	1.04193	0.577905	-0.435699	-0.448851	-0.499197	4
ENSMUSG00000101589	1.09983	1.82609	1.95011	0.542821	0.598258	0.235038	-0.244632	-0.430692	-0.393225	-0.784948	2
ENSMUSG00000102048	-1.64931	-1.66417	-0.961347	-0.886698	-0.538787	-0.230169	-0.158764	0.608911	0.430103	0.93433	6
ENSMUSG00000067780	-0.172758	-0.148384	0.796778	2.45932	0.0543917	-0.161972	-0.170526	-0.167295	-0.17162	-0.168814	3
ENSMUSG00000100053	-0.0684704	-0.0757054	0.145837	1.33164	-0.091439	-0.088384	-0.0872277	-0.090924	-0.0867062	-0.091439	3
ENSMUSG00000085125	0.0771373	0.292067	0.13166	1.19434	-0.075909	-0.0880356	-0.0990422	-0.108102	-0.108237	-0.107266	3
ENSMUSG00000025776	-0.0755885	-0.11505	-0.11505	1.18282	-0.11505	0.128373	-0.10323	-0.11505	-0.107916	-0.0811885	3
ENSMUSG00000099895	-0.0765063	-0.0765063	-0.0342165	0.932536	-0.0765063	-0.0567002	-0.0765063	-0.066643	-0.0594268	-0.0414018	3
ENSMUSG00000100554	-0.498341	-0.264422	0.978048	-0.186205	0.117709	0.862485	0.410697	-0.607477	-0.537196	-0.698847	4
ENSMUSG00000099473	1.87346	4.83534	0.99539	-0.0366957	-0.225593	-0.279061	-0.272331	-0.236681	-0.266078	-0.272979	5
ENSMUSG00000099591	4.79822	3.4405	0.657859	0.132272	0.450675	-0.147612	-0.117974	-0.515565	-0.392587	-0.479727	5
ENSMUSG00000109887	4.37754	3.38223	0.132416	-0.0460648	-0.27039	-0.248682	-0.25454	-0.184368	-0.119534	-0.234919	5
ENSMUSG00000101717	-0.101617	-0.101617	1.07	-0.101617	-0.101617	-0.101617	0.0940301	-0.101617	-0.101617	-0.101617	4
ENSMUSG00000025774	-0.0984065	-0.0984065	-0.0984065	0.255289	-0.0984065	0.131103	0.0626236	-0.0984065	-0.0984065	-0.0984065	4
ENSMUSG00000101685	-0.658692	-0.673149	-0.407821	-0.607672	-0.531019	0.890743	0.361455	-0.336354	-0.176626	-0.418476	4
ENSMUSG00000101306	-0.127289	-0.127289	-0.127289	0.122367	-0.127289	0.316709	-0.127289	-0.127289	-0.127289	0.250861	4
ENSMUSG00000101644	-0.201441	-0.201441	-0.201441	-0.0565885	-0.201441	0.0522622	-0.105165	0.0914809	0.190771	-0.0850765	4
ENSMUSG00000099433	-0.291894	-0.291894	-0.244837	-0.172837	-0.125943	-0.0547903	0.139135	-0.0785486	-0.0804344	0.513336	4
ENSMUSG00000089787	-0.0886145	-0.0886145	-0.0886145	1.92566	-0.0886145	-0.0886145	-0.0886145	-0.0886145	-0.0886145	-0.0886145	3
ENSMUSG00000042596	2.41892	-0.1081	-0.1081	0.165992	0.0755247	-0.1081	-0.1081	-0.1081	0.0826186	-0.1081	2
ENSMUSG00000100720	-0.435691	-0.874372	0.0396471	0.531078	0.185354	-0.324024	-0.187621	-0.00966919	0.532004	-0.16138	4
ENSMUSG00000025927	2.76859	2.55074	1.56789	1.0776	-0.280326	-0.266231	-0.280417	-0.285546	-0.282562	-0.280297	5
ENSMUSG00000101117	-0.564656	-0.599147	-0.130061	-0.251323	-0.22561	-0.0459268	0.0515884	0.209912	-0.191531	0.697492	4
ENSMUSG00000100204	-0.853572	-0.841776	-0.074344	-0.150551	0.427583	-0.474576	-0.533951	0.235699	0.657825	0.469182	4
ENSMUSG00000102597	-0.11472	-0.11472	-0.11472	0.068177	0.60776	-0.11472	0.0736694	0.0989467	-0.11472	-0.11472	4
ENSMUSG00000043760	2.01804	2.98951	1.52973	-0.231677	-0.184509	-0.0910571	-0.0900391	-0.334855	-0.330659	-0.334444	5
ENSMUSG00000104095	0.155749	-0.196851	-0.196851	0.0298032	-0.0983787	-0.0508305	0.127254	-0.0632852	0.134778	-0.196851	4
ENSMUSG00000090142	-1.673	-1.99605	-1.49981	-0.858684	-0.402482	0.330092	0.737991	0.000171968	-0.165282	0.508759	6
ENSMUSG00000099906	-0.109753	1.15397	-0.109753	-0.099781	-0.109753	-0.0595768	-0.089151	-0.109753	0.0014414	0.065355	2
ENSMUSG00000041872	1.86128	0.98417	0.359497	-0.0595825	1.21254	-0.109325	-0.261003	-0.263165	-0.053918	-0.264434	2
ENSMUSG00000041859	-0.642638	-0.944577	-1.57889	-0.596945	0.674053	0.068269	0.195739	-0.0136833	0.44143	-0.421446	6
ENSMUSG00000099714	-0.650731	-0.600935	-0.18008	-0.434657	-0.527486	0.310071	0.0782961	-0.381039	0.33621	-0.0466253	4
ENSMUSG00000102121	0.699046	-0.0711386	1.56355	-0.0981628	-0.100579	-0.100579	-0.100579	-0.100579	-0.100579	-0.100579	1
ENSMUSG00000025931	1.59431	0.120305	-0.0211168	0.0466839	-0.170592	0.0082082	-0.17114	0.0165603	0.0114413	0.0775663	2
ENSMUSG00000100929	-0.109314	-0.109314	-0.109314	-0.0604144	-0.109314	-0.109314	-0.109314	-0.109314	0.392292	-0.109314	4
ENSMUSG00000041809	1.3259	2.84343	0.470044	-0.123088	-0.191391	0.0218675	-0.191391	-0.191391	-0.191391	-0.188449	2
ENSMUSG00000041779	0.883534	0.0854016	0.456958	0.609815	-0.54901	0.443305	0.206374	-0.00558654	-0.513723	-0.438323	2
ENSMUSG00000100819	-0.113611	-0.113611	-0.113611	-0.101107	-0.113611	-0.0906666	0.111019	0.101985	-0.00841387	-0.0975505	4
ENSMUSG00000025933	1.81811	2.15513	0.615529	-0.260745	-0.370757	-0.280215	-0.37037	0.396254	-0.188308	0.135578	2
ENSMUSG00000102633	-0.414407	-0.365873	0.185588	1.12883	-0.12427	-0.23779	-0.16446	-0.0927636	0.112107	0.303679	3
ENSMUSG00000025934	-0.246752	-0.242245	-0.241869	-0.246293	-0.246752	-0.223078	-0.186442	0.322786	0.367823	-0.0152811	4
ENSMUSG00000099343	-0.156017	-0.156017	-0.156017	-0.156017	-0.156017	-0.156017	-0.155153	0.00804932	0.328399	0.184685	4
ENSMUSG00000096375	0.988634	3.60967	0.880301	-0.219158	-0.227852	-0.206874	-0.227852	-0.189315	-0.184097	-0.0810857	5
ENSMUSG00000025936	-0.237252	-0.237252	-0.0634715	-0.227943	0.190228	0.0178543	-0.213145	0.322254	0.100529	-0.132836	4
ENSMUSG00000093963	-0.0899841	-0.0899841	-0.0899841	-0.0873693	-0.0550086	-0.0899841	-0.0156852	0.0092828	0.101151	-0.0899841	4
ENSMUSG00000067750	1.71777	1.24947	1.5734	0.770776	1.4991	0.251194	0.173276	-0.901842	-0.732763	-0.610839	2
ENSMUSG00000086194	-0.277765	-0.273121	1.21284	1.0086	1.2699	0.0809498	-0.176556	-0.188916	-0.383911	-0.295261	3
ENSMUSG00000094436	-0.305461	-0.218229	2.75895	1.91921	0.283339	-0.193494	-0.239761	-0.315331	-0.277824	-0.306286	1
ENSMUSG00000041722	1.64663	1.39353	1.61978	0.975611	1.37074	0.144741	-0.0471646	-0.7579	-0.663031	-0.384155	2
ENSMUSG00000085507	0.505137	1.47465	1.44341	1.58413	1.5674	0.111773	0.00584951	-0.713597	-0.648784	-0.64526	1
ENSMUSG00000094926	-0.292522	-0.207804	2.35921	1.57932	0.8205	-0.192389	-0.246782	-0.298749	-0.279997	-0.289862	1
ENSMUSG00000085079	3.55635	3.71059	1.7871	1.06667	0.437358	-0.316457	-0.39041	-0.464734	-0.432112	-0.416562	5
ENSMUSG00000085679	1.57955	0.394249	1.07476	0.515854	0.551871	-0.174909	-0.174909	-0.174909	-0.174909	-0.174909	2
ENSMUSG00000028033	0.000409213	-0.0964205	0.974988	0.0271562	-0.0964205	-0.0482823	-0.0846501	-0.0925617	-0.0685179	-0.0964205	4
ENSMUSG00000104138	-0.0833236	1.17709	-0.0833236	-0.0542235	-0.0833236	-0.0257147	-0.0277554	-0.0833236	-0.0833236	-0.0833236	2
ENSMUSG00000082935	-1.84635	-2.04048	-1.94571	-1.33521	-0.365641	0.585298	0.665222	0.403933	-0.217163	0.178771	6
ENSMUSG00000103748	-0.0797648	-0.0797648	-0.0797648	-0.0788759	-0.0797648	0.0190213	-0.0795055	-0.0788222	-0.0739279	0.345269	4
ENSMUSG00000099692	-0.323452	-0.330666	-0.270453	-0.317411	-0.261414	1.11561	-0.0554554	-0.274585	-0.287231	-0.322353	4
ENSMUSG00000100418	-0.3332	-0.3332	-0.3332	-0.3332	-0.107792	0.173778	0.0283453	-0.0465784	0.0803013	0.0459201	4
ENSMUSG00000041670	1.60844	3.26727	1.67002	0.00536176	0.0720166	-0.269859	-0.269537	-0.227916	-0.265992	-0.269861	5
ENSMUSG00000101468	-0.314893	-0.314893	2.34781	-0.189988	-0.241511	-0.0565656	-0.0461446	-0.175017	-0.0742183	-0.184738	1
ENSMUSG00000101227	-0.0659844	0.0230005	-0.0659844	-0.057066	-0.0659844	-0.0659844	0.135335	-0.0659844	-0.0659844	-0.0659844	4
ENSMUSG00000073730	-0.086992	0.273271	0.12831	-0.119136	-0.122261	-0.114579	0.0588826	-0.121692	0.10543	-0.116066	4
ENSMUSG00000102766	0.434357	0.183901	-0.168629	-0.072799	-0.168629	0.520468	-0.12476	-0.113645	-0.138701	-0.168629	4
ENSMUSG00000065405	-0.0794107	0.161096	-0.0794107	-0.0333485	-0.0794107	-0.0794107	-0.0386761	-0.0794107	0.110767	-0.0794107	4
ENSMUSG00000097970	-0.106073	-0.106073	0.408551	-0.076002	-0.106073	-0.094124	0.190391	-0.0986954	-0.0989836	-0.106073	4
ENSMUSG00000100775	-0.0974244	-0.0974244	-0.0974244	-0.089012	-0.0974244	-0.0593345	0.104524	0.142263	-0.0974244	-0.0974244	4
ENSMUSG00000026158	0.655305	0.0318521	0.631874	0.143054	0.0335688	0.060931	-0.00366169	0.0844717	-0.111119	-0.493317	4
ENSMUSG00000097920	-0.313017	0.634519	-0.0498196	-0.477916	-0.609527	-0.636387	-0.707971	0.292051	0.678395	1.15005	4
ENSMUSG00000099503	-0.070465	-0.070465	0.00821003	-0.070465	0.648854	-0.070465	-0.070465	-0.070465	-0.070465	-0.0282016	4
ENSMUSG00000026156	-0.145908	-0.0884207	-0.111635	-0.114486	-0.146233	-0.0414671	-0.152921	-0.0244889	0.315765	-0.144427	4
ENSMUSG00000026155	0.678256	-0.0488583	-0.335329	-0.44849	-0.680422	0.236336	0.599002	0.0970037	-0.312265	-0.47435	4
ENSMUSG00000026154	1.1087	0.700094	-0.680457	-0.961718	-0.909316	-0.514916	-0.386361	0.974465	0.305009	0.548108	2
ENSMUSG00000102495	-0.092461	-0.092461	-0.092461	-0.092461	-0.092461	-0.092461	-0.066324	0.171468	0.0979628	-0.092461	4
ENSMUSG00000026153	1.18759	1.85322	2.19667	1.38676	0.140939	-0.348895	-0.271393	-0.0387648	-0.403056	-0.423995	1
ENSMUSG00000102398	0.0911176	1.5431	-0.0745271	-0.106832	-0.11658	0.115816	-0.11658	-0.113073	-0.114165	-0.11658	2
ENSMUSG00000026147	-0.00975368	0.0468354	-0.0517195	0.9384	-0.0676643	-0.0778676	-0.0750124	-0.0778676	-0.0413122	-0.0778676	3
ENSMUSG00000026141	2.21967	1.27022	1.92789	0.696332	-0.274365	-0.175985	-0.130425	-0.280867	-0.279314	-0.278318	5
ENSMUSG00000099997	0.627829	-0.795693	0.792027	1.15145	1.79104	0.683732	-0.24075	-0.66337	-0.307758	-0.892501	3
ENSMUSG00000100131	-1.61284	-1.26702	0.704904	0.903454	0.891732	0.800477	0.101912	-1.07863	-0.188268	-0.293966	3
ENSMUSG00000067736	-1.44267	-1.44427	0.353109	0.785934	0.461934	0.973059	0.170558	-0.953725	-0.356314	-0.05292	3
ENSMUSG00000101939	-1.75645	-1.8442	-0.475531	0.30592	-0.111273	0.886765	0.610926	-0.784856	-0.143687	-0.386628	6
ENSMUSG00000101111	-1.69051	-1.70812	0.371055	0.764582	0.627644	-0.353364	-0.684481	0.290927	0.581007	0.35953	3
ENSMUSG00000100862	-1.91159	-1.82336	0.753771	1.01594	0.682307	0.0617824	-0.393078	0.0399825	0.240557	-0.154051	3
ENSMUSG00000102070	-1.80328	-2.04432	-0.0795288	0.433218	0.330315	-0.445126	-0.498718	0.525269	0.615343	0.400605	6
ENSMUSG00000101249	-0.96025	-1.23128	0.507947	0.897422	0.590058	-0.679307	-0.993016	0.861586	0.698895	0.148575	3
ENSMUSG00000073725	-0.373111	-0.242106	-0.651938	-0.676049	0.608175	0.525577	0.479708	-0.0101178	-0.460494	-0.535917	4
ENSMUSG00000100483	-0.158406	-0.112124	-0.0971383	0.295064	0.0739059	-0.158406	-0.115986	-0.158406	0.228181	0.0173535	4
ENSMUSG00000100450	-0.796902	-0.889928	0.466875	0.352879	0.597617	0.114467	0.185745	-0.246479	-0.176963	-0.156474	3
ENSMUSG00000033569	1.86607	3.09123	0.995496	0.0549117	0.234847	-0.265313	-0.265782	-0.264851	-0.147299	-0.258433	5
ENSMUSG00000080849	-1.50494	-1.5631	-1.39354	-1.23961	-0.676986	-0.278517	0.0697341	0.71672	0.350639	0.955695	6
ENSMUSG00000104257	-0.148534	-0.346652	0.950885	0.13315	1.03786	0.151368	-0.167916	-0.0423388	-0.262986	-0.322097	3
ENSMUSG00000096866	-0.107403	-0.107403	-0.107403	0.903337	-0.107403	-0.107403	-0.107403	0.0888679	-0.107403	0.304472	3
ENSMUSG00000103209	-0.0859955	-0.0859955	-0.0859955	0.491112	-0.0859955	0.143232	-0.0859955	-0.0859955	-0.0637051	-0.0859955	4
ENSMUSG00000104027	0.168975	-0.112752	-0.112752	0.960148	-0.112752	0.0665476	-0.0786784	-0.0864678	-0.0933383	-0.0629891	3
ENSMUSG00000102407	-0.132714	-0.132714	0.273137	0.462878	0.591051	-0.105324	-0.11159	-0.0746828	-0.0915491	-0.0398702	3
ENSMUSG00000104100	0.499728	-0.0121362	-0.173328	1.29269	-0.0738854	-0.0349008	-0.173328	-0.0560153	0.0430726	-0.173328	3
ENSMUSG00000084740	-0.0778958	-0.0778958	-0.0778958	0.015546	-0.0778958	-0.0778958	-0.0140877	-0.0778958	0.112253	-0.0778958	4
ENSMUSG00000101301	-0.455909	-0.487395	0.0985742	-0.014953	-0.464215	0.377323	0.14922	-0.00697266	-0.177075	-0.13553	4
ENSMUSG00000102250	-0.121469	-0.121469	0.00150271	0.890678	-0.121469	-0.0643647	-0.0186804	-0.121469	0.0695026	-0.103174	3
ENSMUSG00000102317	-0.082794	-0.0843904	0.798502	-0.033117	-0.0612757	-0.0760696	-0.0622369	-0.0671633	-0.0534701	-0.0680239	4
ENSMUSG00000103563	-0.0834707	-0.0834707	-0.0834707	0.935401	0.18915	-0.0834707	-0.0834707	-0.0834707	-0.0487449	-0.0834707	3
ENSMUSG00000102465	-0.155392	-0.155392	0.298009	0.565642	-0.155392	0.202033	-0.155392	-0.155392	0.0509536	-0.155392	4
ENSMUSG00000102659	-0.22503	-0.22503	0.100944	0.103272	0.112982	-0.1343	-0.159688	0.0136784	0.321718	-0.197831	4
ENSMUSG00000103924	-0.0725046	-0.0725046	-0.0725046	0.982595	-0.0725046	-0.0725046	-0.0725046	-0.0725046	-0.0725046	0.0147663	3
ENSMUSG00000104132	-0.0889695	-0.0889695	-0.0889695	1.09384	-0.0889695	-0.0889695	-0.0889695	-0.0889695	0.0277315	-0.0889695	3
ENSMUSG00000102747	-0.11633	0.813162	-0.11633	0.876877	-0.11633	-0.11633	-0.11633	-0.0503855	-0.11633	0.292891	3
ENSMUSG00000102386	-0.283053	-0.283053	-0.12512	0.810256	-0.18443	-0.103612	-0.185221	0.0688767	0.244001	-0.0989627	3
ENSMUSG00000103004	-0.0835508	-0.0835508	0.756745	0.583806	-0.0835508	-0.0835508	-0.0835508	-0.0835508	-0.0835508	-0.0835508	3
ENSMUSG00000099458	-0.237719	-0.122885	-0.335619	-0.290283	-0.39424	0.134622	0.00145024	0.0006377	0.192346	-0.0761804	4
ENSMUSG00000073722	4.52079	3.90775	0.276563	0.196798	-0.0908174	-0.248579	-0.263713	-0.263987	-0.262883	-0.263707	5
ENSMUSG00000095256	1.99493	1.91403	0.686153	-0.0937645	-0.160561	-0.160561	-0.160561	-0.150733	-0.118995	-0.150746	2
ENSMUSG00000100310	-0.01326	-0.327988	0.33281	-0.193884	-0.327988	0.0481783	-0.138303	-0.0659751	0.00368602	0.502374	4
ENSMUSG00000101514	-0.215245	-0.240685	0.195368	-0.330082	-0.283301	0.115833	0.258592	-0.101331	-0.0819243	-0.107989	4
ENSMUSG00000101372	-0.621294	-0.174688	0.739639	-0.731947	-0.202733	0.491929	0.586907	-0.532653	-0.215999	-0.677806	4
ENSMUSG00000103241	-0.13208	-0.0268369	-0.13208	0.161805	-0.13208	-0.0575966	-0.105753	-0.13208	0.0645953	0.371555	4
ENSMUSG00000086240	-1.31882	-1.54239	-1.72511	-1.50393	-0.657416	0.423946	0.939723	0.132515	-0.286787	0.317215	6
ENSMUSG00000048411	0.186706	0.288873	0.737151	-0.0845309	-0.104926	0.115698	-0.104926	-0.104926	-0.104926	-0.104926	4
ENSMUSG00000081557	-0.0658614	-0.435146	0.601095	0.592171	2.08508	0.345987	0.0835855	-0.464796	-0.448136	-0.767911	3
ENSMUSG00000058590	-0.441732	-0.418199	0.702003	-0.306377	-0.041005	-0.0652407	-0.218519	0.0295622	-0.000551551	0.54779	4
ENSMUSG00000101235	-0.366517	-0.366517	1.20682	-0.174681	-0.178524	-0.0318583	-0.23737	-0.170266	0.0226571	0.500874	4
ENSMUSG00000099492	-2.01723	-2.05585	-2.00218	-1.78691	-1.50212	0.0954115	0.257861	0.580901	0.689275	0.586137	6
ENSMUSG00000118548	-0.09711	-0.09711	-0.09711	0.221862	-0.09711	0.0822011	-0.09711	-0.09711	0.0934015	-0.09711	4
ENSMUSG00000101726	-0.403195	-0.585333	1.69933	-0.200716	-0.384818	-0.154479	-0.394826	-0.124642	0.335796	0.261547	1
ENSMUSG00000096829	-0.121747	-0.121747	-0.121747	0.905248	-0.121747	0.0617089	-0.121747	-0.121747	0.0692297	-0.121747	3
ENSMUSG00000098883	-0.0835521	-0.0835521	-0.0835521	-0.0835521	-0.0835521	-0.0835521	0.118119	-0.0835521	0.0423764	-0.0835521	4
ENSMUSG00000053185	2.27396	2.221	1.86677	0.0756771	-0.223928	-0.2283	-0.22883	-0.22883	-0.22883	-0.22883	5
ENSMUSG00000100261	-0.544548	-0.430422	-0.566105	-0.534291	-0.226289	-0.283701	-0.0177226	0.204199	0.448819	0.148523	4
ENSMUSG00000101180	-0.193541	-0.193541	-0.193541	-0.0272763	-0.193541	0.0191711	-0.193541	-0.193541	0.129419	0.674251	4
ENSMUSG00000048874	2.31083	1.58046	0.825152	0.987493	0.756483	0.0520148	0.136529	-0.653332	-0.422482	-0.698534	5
ENSMUSG00000103783	-0.21151	-0.21151	-0.178169	-0.0404948	-0.21151	0.0283674	0.232562	-0.21151	0.122971	-0.17334	4
ENSMUSG00000104315	-0.453677	-0.462978	-0.398963	0.0835278	-0.331658	-0.1202	-0.00983893	0.151129	0.383421	-0.231874	4
ENSMUSG00000026064	-0.206634	-0.056973	-0.149437	-0.1893	0.208934	0.119151	-0.0933091	-0.181001	0.196014	-0.206634	4
ENSMUSG00000117310	-0.284694	-0.284694	-0.283476	-0.274181	-0.28177	1.01706	0.0051543	-0.284694	-0.282856	-0.284694	4
ENSMUSG00000117091	-0.292905	0.239545	3.92187	1.13339	-0.0895522	-0.264717	-0.286346	-0.276023	-0.292603	-0.292905	1
ENSMUSG00000086726	-0.326508	-0.125586	2.3635	0.566921	-0.112967	-0.0814877	0.0197338	-0.118522	-0.296801	-0.324163	1
ENSMUSG00000086727	-0.260257	0.431021	4.0257	0.465033	-0.203378	-0.248782	-0.253441	-0.249126	-0.265207	-0.265579	1
ENSMUSG00000100237	2.52078	1.68476	-0.12692	-0.152618	-0.152618	0.0781231	-0.152618	-0.152618	-0.152618	-0.152618	2
ENSMUSG00000100910	0.369924	-0.0827394	0.089774	0.735872	0.878357	-0.127395	-0.123503	-0.127395	-0.126739	-0.127395	3
ENSMUSG00000099796	-0.166553	-0.183822	0.0455828	-0.0743569	0.583704	0.0562518	0.0213477	-0.137329	-0.130368	-0.127962	4
ENSMUSG00000050217	-0.0860853	-0.111681	-0.109155	0.188091	1.50861	-0.111681	-0.111681	-0.111681	-0.111681	-0.111681	3
ENSMUSG00000026063	2.43395	0.338909	-0.0880608	-0.0880608	-0.0880608	-0.0880608	-0.0880608	-0.0880608	-0.0218913	-0.0880608	2
ENSMUSG00000100205	-0.357583	-0.280655	2.91474	2.61556	1.09247	-0.345352	-0.357096	-0.357668	-0.357668	-0.357668	1
ENSMUSG00000100592	-0.332489	-0.27733	3.38356	2.6956	0.365768	-0.334623	-0.337573	-0.338081	-0.338098	-0.338118	1
ENSMUSG00000094215	-0.298851	0.269104	3.86621	1.16394	0.0378537	-0.285392	-0.285056	-0.28489	-0.29898	-0.299127	1
ENSMUSG00000101093	-0.553474	-0.553474	1.37446	-0.381257	-0.511982	0.144849	-0.108701	-0.12895	-0.0931661	0.396344	4
ENSMUSG00000070960	1.55452	2.17814	1.10347	0.788444	-0.397983	-0.419864	-0.465443	0.0781919	0.0130936	-0.0334938	2
ENSMUSG00000082159	-0.405432	-0.405432	-0.170509	-0.350367	-0.339479	0.795549	-0.0446794	-0.289068	-0.111793	-0.0770489	4
ENSMUSG00000026058	0.203484	0.32735	0.0788123	-0.501311	-0.591248	0.303445	0.520358	-0.284653	-0.188109	-0.450391	4
ENSMUSG00000103482	-0.0876414	-0.0876414	-0.0876414	0.641193	-0.0876414	-0.0876414	0.114111	-0.0876414	-0.0876414	-0.0876414	4
ENSMUSG00000104498	0.747827	2.14526	2.6462	2.67478	0.0114958	-0.377783	-0.387016	-0.388298	-0.383781	-0.387531	1
ENSMUSG00000102865	-0.123591	-0.0159041	0.352588	-0.126728	0.5917	-0.125161	-0.132015	0.118521	-0.0617059	-0.0404294	4
ENSMUSG00000102321	0.15922	0.0244437	0.894174	-0.11529	-0.11529	0.0264647	-0.0860771	-0.11529	-0.0682126	-0.11529	4
ENSMUSG00000091318	-0.156649	-0.0295473	0.837785	0.283846	0.568632	-0.222855	-0.0534914	-0.147992	-0.0214265	-0.067123	3
ENSMUSG00000104433	-0.112416	-0.112416	-0.112416	1.63863	0.516085	-0.112416	-0.112416	-0.112416	-0.112416	-0.112416	3
ENSMUSG00000102926	-0.0638227	-0.0638227	-0.0638227	-0.0638227	-0.0638227	-0.0617279	-0.0638227	-0.0594443	-0.0638227	0.355503	4
ENSMUSG00000102917	0.970723	2.93435	2.73077	1.87918	0.269634	-0.379046	-0.400854	-0.416699	-0.415756	-0.407091	5
ENSMUSG00000100481	-0.217446	-0.0519381	0.332222	-0.351153	-0.687693	0.0452823	0.11362	0.0613249	0.024024	-0.0247448	4
ENSMUSG00000100590	0.0471977	0.857807	0.49446	-0.319027	0.126524	0.0883824	0.162033	-0.380971	-0.124107	-0.167734	2
ENSMUSG00000104230	-0.0883233	-0.0883233	1.51276	-0.0883233	-0.0883233	-0.0875019	-0.0883233	-0.0883233	-0.0883233	-0.0883233	1
ENSMUSG00000065223	-0.0897148	-0.0897148	-0.0897148	0.79772	0.630979	-0.0897148	-0.0897148	-0.0897148	-0.0897148	-0.0897148	3
ENSMUSG00000100318	-0.0674029	-0.0674029	-0.0126113	-0.0674029	-0.0674029	-0.0674029	-0.0674029	-0.0674029	0.128027	-0.0585687	4
ENSMUSG00000101612	-0.208491	-0.450705	-0.159637	-0.535812	0.0734762	0.720356	0.0142436	-0.379121	0.0143253	-0.399677	4
ENSMUSG00000065260	-0.0960101	-0.0960101	-0.0960101	0.094297	-0.0960101	-0.0960101	-0.0960101	-0.0960101	0.284971	-0.0960101	4
ENSMUSG00000026134	0.180111	-0.716671	-0.86487	-0.460259	0.467395	-0.21006	-0.124697	0.181477	0.360737	0.15161	4
ENSMUSG00000101682	-1.45549	-1.45583	-0.989463	-1.11593	-0.830241	0.484747	0.813271	0.0158448	-0.128138	-0.150623	6
ENSMUSG00000102714	-0.131547	-0.131547	-0.130051	0.429876	-0.0728988	-0.083426	0.0800442	-0.116868	0.0677607	-0.0719732	4
ENSMUSG00000102093	-0.150823	-0.143273	0.497822	-0.160518	-0.172792	-0.146439	0.001669	0.159603	-0.0502175	0.0934056	4
ENSMUSG00000103746	-0.191481	-0.15852	0.290243	2.15462	0.401237	-0.187797	0.0144182	-0.191481	-0.188006	-0.191481	3
ENSMUSG00000004768	-0.102103	0.461918	-0.201043	0.385497	0.0117441	0.208699	0.139816	-0.424839	-0.0791278	-0.10121	4
ENSMUSG00000042215	-0.228579	-0.292244	-0.247905	-0.33571	-0.353785	-0.00861972	-0.195243	0.28087	0.106788	0.394555	4
ENSMUSG00000042197	1.26697	1.52365	1.89002	1.01726	1.22369	-0.262731	-0.392438	-0.226635	-0.328034	-0.457007	1
ENSMUSG00000081402	-0.688298	-0.524269	2.60636	2.17633	1.59042	-0.179419	-0.39971	-0.507698	-0.173498	-0.584208	1
ENSMUSG00000042182	0.6469	0.19349	0.124585	0.26013	-0.0914063	-0.159012	0.0292355	0.0268255	0.0273249	-0.16558	4
ENSMUSG00000104416	-0.108303	-0.108303	-0.108303	0.902528	-0.108303	-0.0857942	-0.108303	-0.0487773	-0.0652367	0.312877	3
ENSMUSG00000026131	0.981323	0.759947	1.79854	1.66474	0.49225	-0.569361	-0.574616	0.378031	-0.00462086	-0.581322	1
ENSMUSG00000103596	-0.115226	-0.115226	-0.115226	0.0535968	1.06463	-0.0670569	-0.109036	0.00501104	-0.106081	-0.112866	4
ENSMUSG00000099382	-0.123402	-0.123402	-0.123402	-0.123402	-0.123402	-0.123402	-0.123402	0.415923	0.119685	-0.123402	4
ENSMUSG00000103364	-0.253581	-0.24621	-0.261997	0.140897	-0.232908	-0.154133	-0.0897249	0.581754	-0.145934	0.135817	4
ENSMUSG00000096992	-0.224291	-0.0712405	0.827539	1.9648	0.652099	-0.256378	-0.198761	-0.126275	-0.21252	-0.0193825	3
ENSMUSG00000103001	-0.0638009	-0.0638009	-0.0638009	-0.060291	-0.0638009	-0.0638009	-0.0638009	0.234221	-0.0613214	-0.0638009	4
ENSMUSG00000104397	-0.103318	-0.103318	0.738625	1.35454	-0.103318	-0.103318	-0.103318	-0.103318	-0.103318	-0.103318	3
ENSMUSG00000102839	-0.506176	-0.506176	-0.0921618	0.884743	-0.0676755	0.330257	0.360877	-0.296355	-0.279787	-0.349596	3
ENSMUSG00000101206	-0.721534	0.237599	-0.687363	-0.662877	-0.388396	1.23103	0.353687	-0.440743	-0.444154	-0.501011	4
ENSMUSG00000101462	0.0616516	-0.113571	0.486387	0.0139139	-0.236854	-0.157003	-0.250116	-0.148507	0.366405	0.126912	4
ENSMUSG00000102336	-0.144095	1.68455	-0.115752	0.939294	-0.1357	-0.0503839	-0.111064	-0.126555	-0.103292	-0.126165	2
ENSMUSG00000042111	1.58655	1.21043	0.575951	0.96951	0.410014	0.11399	-0.204479	-0.149491	-0.214947	-0.695543	2
ENSMUSG00000101711	0.170737	0.202733	-0.366135	-0.0232821	0.0084469	0.386718	0.348924	-0.280394	-0.25125	-0.392033	4
ENSMUSG00000026127	-0.841958	-0.410572	-0.515371	-0.398388	0.60844	0.408128	0.307475	-0.0230766	-0.394423	-0.139155	4
ENSMUSG00000026126	-0.206963	-0.212171	-0.226869	-0.310519	-0.368639	-0.08405	0.0794461	-0.0783184	0.257179	0.0125502	4
ENSMUSG00000100280	0.0580085	-0.334377	-0.104343	0.466035	-0.124831	-0.11326	-0.160589	0.272396	0.186552	-0.223061	4
ENSMUSG00000101223	-0.0677882	-0.0677882	-0.0677882	-0.051074	-0.0677882	0.163146	-0.053889	-0.0677882	-0.0677882	-0.0556245	4
ENSMUSG00000026125	-0.0858968	-0.0858968	-0.0741392	0.922693	-0.0858968	0.0862212	-0.0858968	-0.0858968	-0.0858968	-0.0858968	3
ENSMUSG00000026124	-0.317189	-0.135648	-0.318525	-0.320349	-0.320903	-0.309045	-0.267465	0.319686	0.471083	0.208621	4
ENSMUSG00000101803	-0.232519	1.04655	0.473824	-0.0758237	-0.192908	0.102434	-0.0399459	-0.177148	-0.112504	-0.164191	2
ENSMUSG00000037529	-0.112028	-0.112028	0.230135	-0.112028	-0.0988997	-0.112028	-0.111892	-0.112028	0.173315	0.101204	4
ENSMUSG00000045174	2.36776	0.575075	-0.141877	0.448807	-0.141877	-0.00404226	-0.141877	-0.141877	0.0118808	-0.141877	2
ENSMUSG00000104098	3.06067	4.69737	0.602438	0.0614728	-0.188132	-0.261842	-0.270235	-0.270517	-0.269788	-0.270943	5
ENSMUSG00000037509	-0.157999	0.129535	0.00452471	1.19593	0.102111	0.0241269	-0.389355	0.0818406	0.148387	-0.25368	3
ENSMUSG00000102612	-0.0887519	-0.0887519	-0.0887519	-0.0748998	0.128179	-0.0887519	-0.0887519	0.207976	-0.0159176	-0.0779379	4
ENSMUSG00000104002	-0.131789	-0.131789	0.0989844	0.458262	-0.0836115	0.0984786	-0.0785298	-0.131789	-0.0200547	-0.0305046	4
ENSMUSG00000037503	1.13371	1.55887	0.187901	-0.016175	0.411749	-0.319424	-0.196559	-0.266761	0.278624	-0.278245	2
ENSMUSG00000104358	-0.154812	-0.154812	-0.154812	0.0778694	-0.154812	-0.11773	-0.0570768	-0.154812	0.183446	0.359542	4
ENSMUSG00000026123	0.141281	0.270721	0.213711	-0.293204	-0.423363	-0.414464	-0.437967	0.46281	0.437458	0.199067	4
ENSMUSG00000103716	0.515645	-0.0667077	0.87955	-0.0524607	0.0188622	-0.0424642	-0.0825647	-0.104024	-0.100719	-0.102212	4
ENSMUSG00000103548	-0.457606	-0.477858	-0.789098	-0.73548	-0.694423	-0.165619	-0.0198407	0.266532	0.37319	0.484886	4
ENSMUSG00000103760	-0.47478	-0.608116	-0.797964	-0.768064	-0.687837	-0.103147	0.245024	0.17334	0.2781	0.221018	6
ENSMUSG00000103997	-0.18189	-0.26354	0.382706	-0.0684698	-0.20468	0.000903713	0.09583	-0.189815	-0.0256052	0.0532908	4
ENSMUSG00000104417	-0.096871	1.43951	0.744535	-0.096871	-0.096871	-0.096871	-0.096871	-0.096871	-0.096871	-0.096871	2
ENSMUSG00000101714	1.94403	-0.0930282	-0.0930282	1.0079	-0.0930282	-0.0930282	-0.0930282	-0.0930282	-0.0930282	-0.0930282	2
ENSMUSG00000102531	-0.112769	2.09341	-0.112769	0.898508	-0.112769	-0.112769	-0.112769	-0.112769	-0.112769	-0.112769	2
ENSMUSG00000103096	-0.232414	-0.232414	0.996547	-0.106945	-0.232414	0.475581	-0.102803	-0.232414	-0.176618	-0.140374	4
ENSMUSG00000102279	-0.146967	-0.144818	-0.146967	-0.146967	-0.146967	-0.146967	0.363935	0.00495198	-0.0983289	-0.0764735	4
ENSMUSG00000103708	-0.185208	-0.186271	-0.186271	-0.176668	0.301393	-0.0453064	-0.0381656	0.249986	0.0281672	-0.169884	4
ENSMUSG00000104201	-0.151586	-0.151586	-0.151586	-0.151586	-0.151586	-0.151586	-0.145166	0.39167	0.0635576	0.188287	4
ENSMUSG00000102434	-0.0814667	-0.0814667	-0.0814667	-0.0714244	-0.0814667	-0.0814667	0.120288	-0.0797405	0.0218529	-0.0814667	4
ENSMUSG00000045216	0.299824	0.937197	0.435674	0.17236	-0.470296	-0.24663	-0.353279	-0.209525	0.439075	0.137671	2
ENSMUSG00000102202	0.0511554	-0.13109	-0.130293	0.137867	0.594166	-0.121299	-0.0577417	-0.125327	0.0519693	-0.0515779	4
ENSMUSG00000037470	-1.28958	-1.33279	-1.26878	-0.684674	0.231931	0.7072	0.366603	-0.0876425	0.0767268	-0.661998	6
ENSMUSG00000047180	-0.198889	-0.150766	0.137693	-0.176873	-0.0441243	0.267844	0.253933	-0.19957	-0.192945	-0.197269	4
ENSMUSG00000037447	-0.338957	-0.341525	2.5164	2.93352	0.068996	-0.258318	-0.319107	-0.384865	-0.179056	-0.27138	1
ENSMUSG00000102762	-0.0903643	-0.0903643	-0.0903643	0.0175673	0.0958054	-0.00774701	-0.0903643	-0.0903643	0.100962	-0.0809863	4
ENSMUSG00000010453	-0.384877	-0.0399902	0.187105	1.27274	1.87321	0.167669	-0.334609	-0.608664	0.209748	-0.850301	3
ENSMUSG00000098680	-0.0874386	0.0762813	-0.0874386	-0.0874386	-0.0874386	-0.0874386	0.0362503	-0.0874386	0.10289	-0.0874386	4
ENSMUSG00000037432	2.26625	2.72567	0.022853	1.06525	-0.182348	-0.0376091	-0.16939	-0.26594	-0.28843	-0.199631	5
ENSMUSG00000001143	0.334434	0.888534	0.0642151	-0.292281	-0.248108	-0.3714	-0.226624	0.0537192	0.320362	0.251955	2
ENSMUSG00000037408	-0.458347	-0.0838377	-0.673747	-0.639745	-0.0572779	0.51078	0.472378	-0.356842	-0.0207851	-0.627939	4
ENSMUSG00000104316	-0.296246	-0.288082	2.18532	0.571004	-0.116091	-0.072808	0.0709269	-0.296246	-0.220017	-0.226186	1
ENSMUSG00000001138	-0.52518	-0.685383	0.712801	1.16831	1.51053	-0.0125137	-0.221549	-0.219189	-0.244619	-0.0731327	3
ENSMUSG00000067653	-0.252159	-0.252159	-0.248475	-0.0601328	-0.109472	-0.0381746	-0.027959	0.256239	0.150496	-0.25045	4
ENSMUSG00000079610	-0.428327	-0.428419	-0.156444	0.474754	-0.252903	0.00822841	0.140327	0.336519	-0.194286	-0.112991	4
ENSMUSG00000026121	0.86986	0.243233	0.626878	0.0967915	-0.0289636	-0.128665	0.0115271	-0.207711	-0.0110219	-0.145936	2
ENSMUSG00000087589	2.2361	1.11716	-0.127957	0.129361	-0.135655	-0.108382	-0.106591	-0.136941	-0.00348379	-0.151817	2
ENSMUSG00000046337	0.421099	0.512911	0.291549	0.425674	0.911156	-0.158167	-0.406094	-0.145577	0.0722011	0.086991	3
ENSMUSG00000089906	-1.09403	-1.47638	-0.110642	0.124741	0.0327481	-0.721218	0.480555	0.72753	-0.106224	0.183694	6
ENSMUSG00000061518	-1.27594	-1.35638	-1.26759	-1.09485	-0.985517	-0.511211	-0.231127	0.745793	0.609274	1.34636	6
ENSMUSG00000037351	-0.863249	-0.642029	-1.03258	-0.942054	-0.0703041	0.0272499	-0.119176	-0.0965537	0.493524	0.552955	6
ENSMUSG00000102416	0.144234	0.215229	-0.0842773	-0.0626938	-0.0842773	-0.078	-0.0459332	-0.0842773	0.105992	-0.0842773	4
ENSMUSG00000104237	-0.269983	-0.102722	0.610604	0.184123	-0.113622	-0.145344	0.0477332	0.0239683	-0.0112569	-0.125801	4
ENSMUSG00000026117	0.0473472	-0.0339593	-0.170106	-0.130936	0.787422	-0.130695	-0.125457	0.169373	0.0125365	-0.0829451	4
ENSMUSG00000026116	-0.019804	-0.0435192	-0.51202	-0.48191	-0.824779	-0.755504	-0.351657	0.400757	0.873432	0.576876	4
ENSMUSG00000103016	-0.096289	-0.096289	-0.096289	-0.096289	-0.096289	-0.096289	-0.096289	0.0404	0.186568	-0.096289	4
ENSMUSG00000102930	-0.368136	-0.368611	-0.361024	-0.363964	-0.257094	-0.278664	-0.304272	0.126818	0.533122	0.454176	4
ENSMUSG00000103159	-0.157456	-0.161136	-0.0472444	-0.152799	-0.154134	0.0971813	-0.157942	-0.0256756	0.268396	-0.152878	4
ENSMUSG00000080054	-1.92504	-1.92969	-1.76531	-1.42894	-0.918401	-0.0581568	0.288298	0.715198	0.431374	0.518036	6
ENSMUSG00000095944	-0.0750024	-0.0750024	0.034731	-0.0279671	-0.0750024	-0.0613823	-0.0750024	-0.0750024	0.129275	-0.0750024	4
ENSMUSG00000050122	-0.223847	-0.340995	-0.153618	0.0239097	-0.0450746	-0.129461	0.00860963	-0.369398	0.291713	0.342636	4
ENSMUSG00000103603	-0.0863474	1.75244	-0.0557827	-0.0863474	-0.0863474	-0.0811859	-0.075171	-0.0863474	-0.0863474	-0.0504371	2
ENSMUSG00000026114	-0.163705	-0.160919	-0.15594	-0.138086	-0.16133	-0.161366	-0.157247	0.446802	0.187171	-0.162621	4
ENSMUSG00000026113	1.00276	2.24075	1.02485	-0.0119294	-0.239085	-0.309464	-0.418174	0.0953121	0.0539344	-0.0976167	2
ENSMUSG00000086064	-0.0744957	-0.0744957	-0.0744957	-0.0741823	-0.0744957	-0.059669	-0.0744957	-0.0744957	0.115589	0.0288944	4
ENSMUSG00000102879	-0.0642695	-0.0642695	-0.0642695	-0.0605	-0.0579537	-0.0642695	-0.0631691	-0.0642695	0.128886	-0.0642695	4
ENSMUSG00000026112	-1.00548	-0.92423	-1.21855	-1.06278	-0.48773	-0.105115	-0.162545	0.585186	0.454128	0.51173	6
ENSMUSG00000026111	3.75953	1.94285	1.71833	0.848326	0.357225	-0.00613509	-0.2909	-0.554142	-0.463627	-0.269055	5
ENSMUSG00000026110	0.647846	1.12931	1.05384	1.27152	0.545733	-0.111919	-0.0481355	-0.208622	-0.454959	-0.253759	2
ENSMUSG00000103948	-0.144612	-0.157971	0.0451022	-0.113242	0.0818016	-0.0655908	-0.0342918	-0.146833	0.193558	-0.1228	4
ENSMUSG00000087233	-0.111137	-0.2513	-0.2513	0.0482421	-0.2513	0.171901	0.293676	-0.108646	-0.176879	-0.028022	4
ENSMUSG00000026090	-0.417171	-0.411733	-0.319986	-0.34397	-0.339378	-0.459983	-0.167803	-0.0894116	0.730548	0.414322	4
ENSMUSG00000089767	-0.206378	0.600447	-0.206378	-0.206378	-0.206378	-0.0762811	0.121498	-0.184672	-0.0450696	0.391691	4
ENSMUSG00000104365	-0.114806	-0.114806	-0.114806	-0.114806	1.07619	-0.0615516	0.0585601	-0.114806	-0.114806	-0.114806	4
ENSMUSG00000102650	-0.111255	-0.111255	-0.111255	-0.043969	0.688147	0.0376916	0.0325004	-0.111255	-0.111255	-0.111255	4
ENSMUSG00000060771	1.33829	1.74481	0.698738	0.149096	-0.160567	-0.183785	-0.313588	-0.00815005	0.0237691	-0.173177	2
ENSMUSG00000097268	-0.159583	-0.157146	-0.0913466	-0.154577	-0.159047	0.209731	0.172753	-0.00499791	-0.159123	-0.158656	4
ENSMUSG00000037216	1.60561	2.42641	-0.0146148	-0.462683	0.0289704	-0.0390952	-0.0257561	-0.325645	-0.0070318	-0.291019	2
ENSMUSG00000026088	0.938266	1.13588	-0.872723	-0.844755	-0.578191	-0.344034	0.193944	0.300953	-0.11016	0.634215	2
ENSMUSG00000026087	-1.54109	-1.62829	-1.67536	-1.47891	-0.782209	-0.0604891	-0.0715232	0.837535	0.416929	0.862471	6
ENSMUSG00000061584	-0.111001	-0.111001	-0.111001	-0.0114722	-0.111001	-0.111001	0.0491748	-0.111001	0.222075	-0.111001	4
ENSMUSG00000087374	0.389467	-0.041094	1.20821	-0.102547	-0.130665	-0.109042	-0.136639	0.0307787	-0.0787527	-0.115358	4
ENSMUSG00000058407	1.06781	0.120767	-1.37822	-0.791534	-0.34097	-0.211407	-0.0264368	0.561708	0.198016	0.209207	4
ENSMUSG00000026083	0.915662	-0.410299	0.342971	1.17966	1.69715	0.310296	0.358463	-0.655458	-0.577188	-0.781346	3
ENSMUSG00000026082	0.112458	1.17692	0.736213	0.723802	0.918245	-0.189406	-0.35274	-0.185783	-0.112677	-0.0222435	2
ENSMUSG00000102716	-0.304065	-0.304065	2.53291	1.65428	0.651406	-0.218491	-0.252728	-0.299076	-0.250833	-0.293547	1
ENSMUSG00000037138	1.4435	1.03012	1.82395	0.414227	-0.205335	-0.0778064	-0.141916	-0.317861	-0.158667	-0.309751	2
ENSMUSG00000085391	2.81029	2.13792	-0.145518	-0.113261	-0.145518	-0.0286249	-0.145518	-0.145518	-0.131003	-0.145518	5
ENSMUSG00000085280	-0.0743149	0.0745646	-0.0337667	-0.0743149	0.66654	-0.0522693	-0.0743149	-0.0743149	-0.0743149	-0.0743149	4
ENSMUSG00000087131	-0.0889588	-0.0511757	-0.0601187	0.000403432	-0.0889588	0.14063	-0.0042281	-0.0889588	-0.0785008	-0.0533955	4
ENSMUSG00000102984	-0.0740151	-0.0740151	-0.0740151	-0.0740151	-0.0740151	0.211125	-0.0699963	-0.0740151	-0.0740151	-0.0642401	4
ENSMUSG00000102541	0.112109	1.26759	-0.0685925	-0.0685925	-0.0685925	-0.0685925	-0.0660455	-0.0685925	-0.0685925	-0.0685925	2
ENSMUSG00000103531	-0.0700091	-0.0700091	0.769158	0.114238	-0.0700091	-0.0700091	-0.0700091	-0.0700091	-0.0700091	-0.0700091	4
ENSMUSG00000048814	2.57676	0.950563	1.97611	0.834745	0.342252	-0.247092	-0.27343	-0.274571	-0.269795	-0.274405	5
ENSMUSG00000026080	-0.12739	0.139775	0.613858	0.578958	-0.246912	-0.292886	-0.241485	0.302329	-0.12109	0.331002	4
ENSMUSG00000102447	-1.17984	-1.26916	-0.661284	-0.8741	-0.733055	-0.0391224	-0.154061	0.0320223	0.549616	0.87574	6
ENSMUSG00000067604	-0.0968695	-0.0968695	-0.0968695	1.95234	-0.0968695	-0.0968695	-0.0968695	-0.0968695	-0.0968695	-0.0968695	3
ENSMUSG00000026078	-0.939593	-1.06596	-1.32585	-1.23483	-0.846996	-0.395797	-0.2056	0.471481	0.676086	1.17644	6
ENSMUSG00000103046	-0.142289	-0.142289	-0.131784	-0.139723	-0.128633	-0.116553	-0.131181	0.168559	0.167404	0.0848518	4
ENSMUSG00000104188	0.338747	-0.0895588	-0.0895588	-0.0548323	-0.0895588	-0.0895588	0.230078	-0.0895588	-0.0895588	-0.0895588	4
ENSMUSG00000103182	0.0326149	-0.199107	1.40223	0.749202	-0.0205185	0.195259	0.239363	-0.340377	-0.406115	-0.417988	1
ENSMUSG00000026077	4.01368	2.91643	0.753717	-0.0325287	-0.271909	-0.0869964	-0.148679	-0.288049	-0.289991	-0.328074	5
ENSMUSG00000092553	-0.606094	-0.602625	0.442791	-0.351482	-0.199367	0.942492	0.452414	-0.438225	-0.52056	-0.556797	4
ENSMUSG00000092563	-0.752782	-0.8782	-0.310793	-0.545585	-0.729811	0.581028	0.677459	-0.402163	-0.308562	0.00119254	4
ENSMUSG00000073702	-2.34498	-2.42023	-1.84562	-1.1462	-0.761078	0.124935	0.54414	0.504839	0.0446402	0.86549	6
ENSMUSG00000003134	4.32636	3.3228	1.13704	0.424258	-0.162002	-0.340339	-0.371259	-0.315885	-0.12757	-0.352822	5
ENSMUSG00000003135	2.7864	1.53219	0.125494	0.0262091	0.208746	-0.0049228	0.331461	-0.392016	-0.299371	-0.635617	5
ENSMUSG00000085894	-0.344462	-0.342214	-0.162385	-0.204292	-0.280222	0.246111	0.0222682	-0.204684	0.218846	-0.189653	4
ENSMUSG00000077704	-0.284924	-0.284924	-0.284924	-0.105198	0.646647	0.43275	-0.0975744	-0.151874	-0.0627034	-0.284924	4
ENSMUSG00000048234	-1.18637	-1.17743	-1.10716	-0.729433	-0.33499	0.332418	0.567847	0.162693	0.0710484	-0.536703	6
ENSMUSG00000064936	-0.322726	-0.224904	-0.291065	-0.157029	-0.103462	0.0198225	0.292003	-0.19927	-0.0132604	0.0036066	4
ENSMUSG00000102471	-1.55412	-1.58114	-1.03118	-0.998242	-0.892249	0.558119	0.7969	-0.135386	-0.0795978	-0.0777845	6
ENSMUSG00000050967	-0.134783	-0.0469677	-0.130078	-0.0800852	-0.134783	0.189946	-0.133649	0.239053	-0.0460348	-0.134783	4
ENSMUSG00000097083	-0.398831	-0.35161	-0.284559	0.150168	0.0608055	0.327562	0.137245	0.0284205	-0.205262	-0.316805	4
ENSMUSG00000057173	-0.107404	-0.107404	-0.107404	-0.0130884	0.086516	0.12231	-0.0914296	-0.107404	-0.0924157	0.27744	4
ENSMUSG00000101634	-0.0214238	-0.0685309	0.770513	-0.053169	-0.0685309	-0.0685309	-0.046008	-0.0685309	-0.0685309	-0.0685309	4
ENSMUSG00000026074	0.252452	-0.12847	0.0236063	-0.322886	-0.40068	-0.44642	-0.0238236	0.292648	0.2537	0.250439	4
ENSMUSG00000102985	-0.0648805	-0.0648805	-0.0648805	-0.0196405	-0.0648805	-0.0635553	-0.0648805	-0.0648805	0.125023	-0.0648805	4
ENSMUSG00000026073	2.58615	0.165976	-0.13143	-0.0201959	-0.13143	0.240674	-0.13143	-0.13143	-0.13143	-0.13143	2
ENSMUSG00000097899	0.730097	1.28771	-0.0753958	-0.0504682	-0.0813819	-0.0755925	-0.0813819	-0.0813819	-0.0795224	-0.0813819	2
ENSMUSG00000102975	-0.0876094	1.40713	-0.0876094	-0.0876094	-0.0876094	0.0225676	-0.0876094	-0.0876094	-0.0876094	-0.0876094	2
ENSMUSG00000026072	2.97759	2.72331	0.231495	0.332534	0.0157554	-0.0953953	-0.304019	-0.304805	-0.0561061	-0.303558	5
ENSMUSG00000103560	1.19846	2.30317	2.8063	2.47174	-0.0151892	-0.378607	-0.398989	-0.405567	-0.401586	-0.404915	1
ENSMUSG00000070942	5.09332	3.16844	1.17469	0.449235	-0.243832	-0.291167	-0.30002	-0.295769	-0.298916	-0.299367	5
ENSMUSG00000103230	-0.635308	-0.635308	0.929886	-0.166971	-0.316648	0.121279	0.0669668	-0.0720353	-0.309138	0.529864	4
ENSMUSG00000026069	0.249169	-0.0469241	-0.0418741	-0.0415521	-0.118451	-0.0926325	-0.032059	-0.139322	-0.0737556	0.479357	4
ENSMUSG00000026070	5.08541	2.66866	0.933994	0.452775	-0.271076	-0.268149	-0.236257	-0.271027	-0.270083	-0.270452	5
ENSMUSG00000026068	0.390379	1.16049	1.55816	0.203991	-0.187313	0.0226084	-0.183916	-0.187313	-0.186713	-0.187313	2
ENSMUSG00000026065	0.248678	2.10051	0.237017	-0.0812115	-0.0649565	-0.131453	-0.120489	-0.0937107	-0.0991516	-0.131453	2
ENSMUSG00000102676	5.5522	1.40907	0.203739	0.455837	-0.161804	-0.187355	-0.185957	-0.186428	-0.185472	-0.187884	5
ENSMUSG00000026062	2.62088	0.0112481	-0.0806611	0.0157355	-0.0806611	-0.0630713	-0.0679021	-0.0806611	-0.0667298	-0.0806611	2
ENSMUSG00000103270	1.44528	2.93212	-0.0293892	0.765744	-0.149155	-0.162073	-0.169711	-0.169711	-0.169711	-0.169711	2
ENSMUSG00000041945	0.165562	0.0665433	-0.0791073	-0.11173	-0.114714	-0.111704	-0.0397211	-0.114714	0.249034	-0.114714	4
ENSMUSG00000079588	2.26815	1.14788	-0.116705	-0.0740384	0.370366	-0.116705	-0.10994	-0.108289	-0.116705	-0.116705	2
ENSMUSG00000094136	-0.248824	-0.248824	0.0527012	-0.151522	-0.248824	-0.177003	-0.194093	0.185281	0.0567392	0.647428	4
ENSMUSG00000100832	-0.116632	0.0107237	0.491365	0.146341	-0.116632	-0.116632	-0.00229422	-0.116632	0.0742478	-0.116632	4
ENSMUSG00000100178	-0.129453	-0.301446	1.98228	0.0121481	-0.252249	-0.204951	-0.15547	-0.0278933	-0.0607366	0.0820441	1
ENSMUSG00000101877	0.00920888	-0.15972	1.09898	1.18077	-0.0578703	-0.146839	-0.102584	-0.110122	-0.125166	-0.150003	1
ENSMUSG00000053640	-0.0863617	-0.0863617	-0.0863617	0.0797448	-0.0863617	0.0324786	-0.0863617	-0.0863617	0.103947	-0.0863617	4
ENSMUSG00000101919	-0.0869247	1.99861	-0.0869247	-0.0869247	-0.0869247	-0.0869247	-0.0869247	-0.059894	-0.0869247	-0.0869247	2
ENSMUSG00000101299	2.41757	-0.109902	-0.109902	0.798736	-0.109902	-0.109902	-0.00442536	-0.109902	-0.109902	-0.109902	2
ENSMUSG00000060424	-0.0195904	0.435872	0.725049	0.434211	-0.118129	-0.116857	-0.0386033	-0.118129	-0.112307	-0.116526	4
ENSMUSG00000045515	-0.099673	-0.0283454	0.0535995	-0.099838	-0.139318	0.205554	0.0939425	-0.09625	-0.151015	-0.0977423	4
ENSMUSG00000093436	-0.0864161	-0.0864161	-0.0864161	0.376608	-0.0864161	-0.0864161	-0.0864161	-0.0864161	0.103894	0.00263651	4
ENSMUSG00000097063	-0.0777271	1.18199	-0.0777271	0.323041	-0.0777271	-0.0777271	-0.0777271	-0.0777271	-0.0777271	-0.0777271	2
ENSMUSG00000099784	2.4291	1.16729	-0.0945309	-0.0577871	-0.0945309	-0.0945309	-0.0945309	-0.0880829	-0.0774477	-0.0945309	2
ENSMUSG00000060679	-0.278745	0.184102	-1.0338	-1.15264	-0.267954	0.0348911	-0.181959	0.32225	0.37621	0.16636	4
ENSMUSG00000041907	0.264655	0.175563	0.298442	1.12599	-0.155162	-0.024864	0.0485561	-0.154067	-0.153478	-0.152274	3
ENSMUSG00000070939	2.27318	2.03472	1.27494	0.486336	0.502448	-0.0436254	0.0133024	-0.47014	-0.479928	-0.41217	5
ENSMUSG00000010290	0.679901	0.845647	-0.64423	-0.438984	-0.206895	0.0646556	0.154525	-0.0454317	0.000835977	-0.147433	2
ENSMUSG00000008136	-0.422736	-0.365263	-0.443194	-0.409645	-0.457457	-0.452776	-0.327544	0.830605	-0.136101	1.48768	4
ENSMUSG00000094497	-1.43324	-1.51274	-1.38429	-0.710638	-0.522989	-0.211116	0.124509	0.533864	0.283294	0.782178	6
ENSMUSG00000099576	-0.424781	-0.41584	-0.283572	0.713553	0.180078	0.457697	0.420214	-0.385487	-0.361053	-0.422289	3
ENSMUSG00000099694	-0.370912	-0.603099	1.20334	0.00998365	-0.478164	0.261686	-0.11521	-0.132223	-0.0525505	-0.000418737	4
ENSMUSG00000101923	-0.503585	-0.0919396	-0.744516	-0.750164	-0.504305	0.462102	0.414609	-0.106192	-0.17822	-0.0733662	4
ENSMUSG00000066877	-0.766752	-0.784939	-0.801164	-0.804563	-0.431386	-0.0658408	0.141474	-0.114684	0.207011	0.908186	6
ENSMUSG00000103422	-0.153263	-0.153263	-0.153263	-0.151417	-0.153263	0.0768212	-0.105066	-0.0138768	0.125796	0.125665	4
ENSMUSG00000103945	-0.450628	-0.470898	-0.486763	-0.474687	-0.46713	-0.0617051	-0.0875539	0.170428	0.452794	-0.0001	4
ENSMUSG00000100764	-0.187643	1.08581	0.0616563	-0.187643	-0.187643	-0.01971	0.127356	0.0768658	-0.187643	-0.187643	2
ENSMUSG00000100635	-0.0784858	-0.0784858	-0.0784858	-0.0460122	-0.0784858	0.245274	-0.0784858	-0.0784858	-0.0784858	-0.0784858	4
ENSMUSG00000100480	1.27974	0.982669	1.10361	-0.126993	-0.135441	-0.128874	-0.135441	-0.135441	-0.0951105	-0.135441	2
ENSMUSG00000057363	2.24978	2.98158	2.03149	1.25622	0.23637	-0.460217	-0.353155	-0.339378	-0.300901	-0.321126	5
ENSMUSG00000090243	-0.131112	-0.0119283	-0.330644	-0.404599	-0.449704	-0.322736	-0.283996	0.510367	0.235876	0.484918	4
ENSMUSG00000100701	-0.504943	0.167952	-1.24161	-1.17915	-1.16057	-0.368932	-0.143118	0.092424	0.764253	0.973167	6
ENSMUSG00000101395	-0.156941	0.473075	0.649256	-0.162853	-0.230665	0.180614	-0.0846649	-0.230665	0.0254094	-0.137832	4
ENSMUSG00000095757	-0.142566	-0.142566	1.19028	0.606033	0.0335278	-0.142566	-0.142566	-0.142566	0.0484466	-0.142566	1
ENSMUSG00000041763	-0.558771	-0.428994	-0.665836	-0.786533	0.788034	-0.148025	0.222242	-0.0854501	0.35273	-0.412436	4
ENSMUSG00000047343	-0.234379	-0.232099	1.21107	0.125646	-0.223584	-0.0923287	-0.0732421	0.0559297	0.0252424	-0.224156	4
ENSMUSG00000090106	-0.500912	-0.461019	2.99883	0.763749	-0.136773	0.19454	0.19922	-0.488568	-0.489346	-0.499618	1
ENSMUSG00000091844	-0.16056	-0.15696	0.192464	0.638555	0.0987359	0.0703614	-0.16056	-0.159935	-0.0810073	0.255161	3
ENSMUSG00000026049	-0.137418	0.520446	1.20298	1.20952	1.17808	-0.214051	-0.292305	-0.200762	-0.321003	0.0514412	1
ENSMUSG00000026047	0.519694	0.17048	-0.0452315	-0.156764	-0.240857	-0.146549	-0.24116	0.26995	0.30044	-0.18982	4
ENSMUSG00000041684	1.39122	1.90288	1.02247	0.0333295	-0.324851	-0.297118	-0.324153	-0.112512	0.222004	-0.312618	2
ENSMUSG00000026048	1.66086	0.781979	-0.182022	-0.257717	-0.235711	-0.16924	-0.0853829	0.0444731	0.0735095	0.0612386	2
ENSMUSG00000046828	2.42435	-0.100868	-0.100868	-0.0947919	-0.100868	-0.0431972	-0.0913095	-0.0567457	0.00649677	-0.100868	2
ENSMUSG00000089703	-0.389724	-0.290816	-0.073575	-0.310296	-0.421844	0.833704	0.244435	-0.445236	-0.210135	-0.368854	4
ENSMUSG00000100966	-0.122278	-0.122278	-0.122278	-0.122278	-0.122278	0.0822172	0.0801674	0.00621093	-0.0703004	-0.0439765	4
ENSMUSG00000100769	0.103631	-0.0473428	-0.245555	-0.533068	-0.610643	-0.560855	-0.440176	0.460311	0.373108	1.16882	4
ENSMUSG00000101567	-0.707967	-0.851416	-0.895871	-0.924326	-0.901796	-0.777591	-0.6962	1.03322	0.953271	1.06805	6
ENSMUSG00000056870	-0.348822	-0.343615	-0.338832	-0.345206	-0.366788	-0.363611	-0.362362	-0.290724	0.590343	1.22961	4
ENSMUSG00000102319	-0.133373	-0.138749	-0.138749	-0.132385	-0.137012	-0.119377	-0.138629	0.146538	0.0192594	0.506336	4
ENSMUSG00000089877	-0.747235	-0.677467	-0.58115	-0.700218	-0.56755	-0.151693	-0.128464	0.0710433	0.643874	0.179045	6
ENSMUSG00000103071	1.04631	2.13862	2.77071	2.58843	0.0657439	-0.380816	-0.402382	-0.403387	-0.398204	-0.40218	1
ENSMUSG00000100434	-0.254462	-0.254462	1.45249	0.1237	0.0665101	-0.109021	-0.0978646	-0.180683	-0.0493528	0.0793575	1
ENSMUSG00000100013	2.41558	3.32059	1.05955	-0.0992254	-0.364447	-0.0280239	-0.0274071	-0.393213	-0.458503	-0.107241	5
ENSMUSG00000101251	-0.476973	-0.476973	0.300893	-0.38221	-0.449718	1.24306	0.0428401	-0.400598	-0.396452	-0.415549	4
ENSMUSG00000101937	-1.09739	-1.10759	-1.05753	-1.1273	-0.988247	-0.414065	-0.419014	0.442443	1.21178	0.4563	6
ENSMUSG00000026043	-0.165682	-0.165682	-0.0266712	0.47804	-0.139224	-0.148695	0.374113	-0.140431	-0.091973	-0.149875	4
ENSMUSG00000026042	0.0367469	-0.0791669	-0.0797859	0.0380794	-0.0884096	-0.0886781	-0.0815042	-0.0895345	0.102106	0.100658	4
ENSMUSG00000104476	-0.229676	0.474693	-0.228227	-0.232175	-0.245292	0.140452	0.4293	-0.242896	-0.229404	-0.096365	4
ENSMUSG00000100218	-0.423681	-0.423681	-0.202638	-0.306371	-0.277541	0.550913	0.315807	-0.240598	-0.249747	-0.172854	4
ENSMUSG00000100361	-0.871016	-0.896297	-0.524895	-0.7262	-0.386307	1.03391	0.404452	-0.282451	-0.259955	-0.529592	6
ENSMUSG00000100894	-0.296881	-0.348343	-0.15251	-0.220083	-0.186169	0.0836118	0.109391	-0.191585	0.0320258	0.20616	4
ENSMUSG00000065255	0.456563	-0.121397	-0.129335	0.151364	0.606634	0.210872	-0.129335	-0.129335	-0.125843	-0.129335	4
ENSMUSG00000100843	-0.154869	-0.163425	-0.017536	-0.143755	-0.0678732	0.373162	0.0186538	-0.155543	-0.116135	-0.151407	4
ENSMUSG00000025995	-1.28178	-1.46731	-1.211	0.194446	1.43333	0.734248	0.663847	-0.490668	-0.480918	-0.580889	6
ENSMUSG00000099850	-0.261791	-0.261791	-0.261791	0.0531373	-0.150007	-0.0132727	-0.190128	0.168301	0.267721	-0.082057	4
ENSMUSG00000084817	-1.45525	-1.50712	-1.37758	-1.26839	-1.11887	-0.400398	-0.018632	0.512037	0.45776	1.65149	6
ENSMUSG00000098549	-1.62774	-1.31435	-0.841031	-1.11375	-0.393153	0.911627	0.281733	0.13942	-0.00334117	-0.625066	6
ENSMUSG00000099381	0.500341	0.207058	3.50393	-0.0742751	-0.201787	-0.203038	-0.205589	-0.206524	-0.206524	-0.206524	1
ENSMUSG00000025993	-0.133565	-0.0884061	0.379501	0.255811	-0.133565	-0.0778251	-0.13173	-0.133565	-0.129577	0.575997	4
ENSMUSG00000099946	-0.704285	-0.614064	1.26714	0.686975	0.24974	0.945301	0.132769	-0.66374	-0.475989	-0.761634	3
ENSMUSG00000070896	-1.97867	-1.97722	-1.44488	-1.43526	-1.09179	-0.00963084	0.538466	0.628895	-0.0160744	0.986613	6
ENSMUSG00000090682	1.78786	2.76008	-0.152498	-0.179742	-0.259446	0.0287974	-0.284872	-0.0874285	-0.191061	0.170951	2
ENSMUSG00000044457	-0.102813	1.16004	0.786273	-0.0794228	-0.102813	-0.0899756	-0.102813	-0.102813	-0.102813	-0.0885286	2
ENSMUSG00000099432	-0.309616	-0.362194	1.76618	2.15754	-0.0829605	-0.217953	-0.139429	-0.142789	-0.230171	-0.160698	1
ENSMUSG00000041144	2.81917	3.35017	1.95454	0.660096	0.343296	-0.403676	-0.387485	-0.366641	-0.275671	-0.363639	5
ENSMUSG00000096047	-0.215754	-0.215754	-0.215754	0.226263	0.103191	0.178949	0.121133	-0.161063	-0.0340633	-0.215754	4
ENSMUSG00000101262	-1.8985	-1.9587	-1.61398	-1.4961	-0.839346	0.730303	1.05981	-0.36818	-0.379786	0.702761	6
ENSMUSG00000101337	2.97593	3.71711	1.75335	0.67626	0.246241	-0.366973	-0.338736	-0.333038	-0.369487	-0.370877	5
ENSMUSG00000025986	3.47056	2.74958	1.58509	1.01043	0.415323	-0.132568	-0.499067	-0.346889	-0.364983	-0.370587	5
ENSMUSG00000100213	0.391221	-0.174029	0.713696	1.06105	-0.191846	0.018412	-0.190722	0.136171	-0.190826	-0.102157	3
ENSMUSG00000103129	-0.162498	-0.162498	-0.162498	0.0851728	-0.0155833	-0.162498	-0.0108437	0.130399	0.196696	-0.162498	4
ENSMUSG00000100160	-0.518149	-0.480414	-0.518149	-0.395244	0.361486	0.00575658	-0.170788	0.0915012	0.201301	0.230476	4
ENSMUSG00000101921	-0.529499	-0.33188	1.16463	1.33449	1.77426	-0.0955527	-0.165749	-0.333256	-0.225746	-0.483335	3
ENSMUSG00000101447	-0.313913	-0.333721	3.39779	2.08392	0.216745	-0.26047	-0.23721	-0.335663	-0.353512	-0.302159	1
ENSMUSG00000081185	-0.420003	-0.508667	-0.417621	-0.290004	-0.453807	1.06713	0.635984	-0.472822	-0.449674	-0.784581	4
ENSMUSG00000103246	-0.0628695	1.19499	-0.0628695	-0.0628695	-0.0628695	-0.0628695	-0.0628695	-0.0628695	-0.0628695	-0.0628695	2
ENSMUSG00000100033	-1.96164	-2.0138	-1.67764	-1.53487	-0.89919	0.656249	0.998907	-0.303718	-0.280699	0.76705	6
ENSMUSG00000094968	-0.30624	-0.30624	1.98375	3.0758	0.515131	-0.231257	-0.283838	-0.30624	-0.301336	-0.30624	1
ENSMUSG00000101996	0.38777	0.233398	0.841133	-0.0356889	-0.330543	0.0843017	-0.0945672	-0.0867744	-0.0191261	-0.147678	4
ENSMUSG00000096973	-0.506084	-0.673792	-0.180157	-0.587292	-0.616389	-0.63607	-0.658391	0.316306	0.962139	0.968239	4
ENSMUSG00000064943	-0.222963	-0.128824	-0.29434	-0.0888175	0.203123	-0.184749	-0.202461	0.427144	0.00934433	0.256854	4
ENSMUSG00000100866	-0.146001	-0.146001	-0.146001	-0.146001	0.190898	-0.146001	-0.0765173	0.149259	-0.0439407	0.408141	4
ENSMUSG00000101721	-0.24045	-0.24045	0.825704	-0.153833	-0.0273116	-0.102601	0.0234304	-0.079757	-0.00980833	0.061339	4
ENSMUSG00000099376	-0.158175	-0.158175	0.688339	-0.0535492	-0.158175	-0.1062	0.140312	-0.158175	-0.0475453	0.0528189	4
ENSMUSG00000097883	2.23552	1.66807	0.0570549	-0.299031	-0.630529	-0.674431	-0.670773	0.110446	0.583526	0.724086	2
ENSMUSG00000099698	-0.138224	-0.138224	0.706628	-0.0251241	-0.138224	-0.00063753	-0.138224	-0.0454923	-0.0341534	0.150245	4
ENSMUSG00000099454	-0.437687	-0.437687	-0.34929	-0.403958	-0.435981	0.155809	1.03143	-0.351221	-0.348579	-0.350982	4
ENSMUSG00000051616	-0.00951565	-0.22281	0.377736	-0.0152632	-0.22281	-0.00651123	0.0927105	-0.0202869	-0.0942117	-0.0251146	4
ENSMUSG00000099627	-0.545521	-0.5618	0.0364818	-0.497766	-0.562183	0.755712	0.245504	-0.400017	-0.159192	-0.183411	4
ENSMUSG00000099577	-0.142298	-0.142298	-0.142298	-0.142298	-0.142298	-0.0273663	-0.142298	0.0506751	-0.00332312	0.566772	4
ENSMUSG00000101760	-0.300085	-0.17341	3.18649	1.97534	0.383327	-0.295525	-0.294039	-0.293821	-0.300085	-0.298778	1
ENSMUSG00000099608	-0.216926	-0.216926	-0.0157645	0.16166	0.543519	-0.0555017	-0.216926	-0.061998	0.0380393	0.289444	4
ENSMUSG00000099864	-0.232951	-0.153752	3.8046	0.0672566	0.194615	-0.225941	-0.222177	-0.232951	-0.232625	-0.232951	1
ENSMUSG00000099941	-0.302275	-0.302275	-0.0212929	-0.0848351	-0.302275	0.148708	0.0378768	0.206068	-0.00587342	-0.257041	4
ENSMUSG00000100816	-0.354559	-0.285328	2.32988	0.42281	0.0473661	0.227486	0.286416	-0.484627	-0.458797	-0.528567	1
ENSMUSG00000026109	0.549513	0.56941	1.32803	0.182021	-0.133167	-0.131372	-0.133167	-0.133167	-0.111246	-0.131081	2
ENSMUSG00000100671	0.406081	0.0489183	0.329754	-0.169874	-0.191777	0.0397637	0.424501	-0.258951	-0.207527	-0.198354	4
ENSMUSG00000092906	2.23966	1.19745	2.41981	1.56137	-0.288938	-0.317175	-0.32866	-0.284921	-0.26358	-0.212445	5
ENSMUSG00000101242	2.77316	3.13731	-0.165932	-0.165932	-0.165932	-0.0796061	-0.165932	-0.165932	-0.165932	-0.165932	5
ENSMUSG00000099924	4.22247	1.56064	1.20595	-0.200023	-0.12554	-0.132685	-0.214664	-0.212464	-0.21403	-0.206243	5
ENSMUSG00000099625	-0.125321	-0.13313	-0.120856	-0.105986	-0.106344	0.389325	-0.0437711	-0.110347	-0.0998416	-0.0981834	4
ENSMUSG00000101799	-0.102279	-0.102279	-0.102279	-0.0166033	-0.102279	0.127318	-0.102279	-0.102279	0.00247037	0.132555	4
ENSMUSG00000045954	-0.114833	1.14952	-0.0959021	1.55432	-0.114833	-0.112117	-0.104723	-0.114833	-0.102876	-0.114833	3
ENSMUSG00000099741	0.171089	-0.162013	-0.10046	-0.21867	-0.17696	1.05676	-0.174269	-0.306007	-0.224676	-0.374596	4
ENSMUSG00000101702	-0.118376	-0.0745716	0.360076	2.04976	-0.118376	-0.118376	-0.118376	-0.118376	-0.118376	-0.118376	3
ENSMUSG00000026107	-0.903482	-0.651241	0.58674	1.06038	1.01279	0.452355	0.156561	-0.687167	-0.164001	-0.77816	3
ENSMUSG00000099413	1.38661	3.81967	0.982866	-0.224459	-0.226026	-0.14379	-0.223491	-0.22463	-0.225018	-0.226026	5
ENSMUSG00000103424	-0.14922	-0.14922	1.50335	0.0252675	-0.14922	-0.0261327	-0.131088	-0.14922	0.000877586	-0.134473	1
ENSMUSG00000101741	-0.137099	-0.106816	-0.0994209	1.4613	-0.137099	-0.11714	-0.0650882	-0.137099	0.0642802	-0.137099	3
ENSMUSG00000018417	-1.51032	-1.52302	-0.993186	-0.00422004	0.723366	0.737197	0.401296	0.0998885	-0.188881	-1.07618	6
ENSMUSG00000101724	-0.160181	-0.160181	-0.160181	-0.138785	0.120796	-0.138697	0.320453	0.00807551	-0.151615	-0.0890905	4
ENSMUSG00000100313	-0.137727	-0.138346	0.15387	0.279402	-0.138686	-0.12725	0.142111	-0.0294511	-0.0500494	-0.124951	4
ENSMUSG00000100696	-1.47013	-1.53433	-1.18671	-0.826665	-0.935919	0.430454	0.843135	-0.0217869	-0.268377	0.318049	6
ENSMUSG00000072324	-2.26094	-2.29749	-1.60439	-1.61517	-0.710256	0.546457	0.601873	0.313822	-0.0647938	0.474917	6
ENSMUSG00000062939	-0.0205134	0.0627478	0.772566	-0.0402752	-0.110602	0.120016	-0.109182	-0.110602	-0.109778	-0.110602	4
ENSMUSG00000101628	-0.0815424	-0.0815424	-0.0815424	0.0989703	-0.0815424	0.22398	-0.0815424	-0.0815424	-0.0815424	-0.0815424	4
ENSMUSG00000078291	-2.18018	-2.17265	-1.40214	-1.32655	-1.11642	-0.102521	0.40347	0.774781	0.165078	0.877864	6
ENSMUSG00000109599	-0.0845477	-0.0845477	-0.0845477	0.1304	-0.0845477	0.144647	-0.0845477	-0.0845477	-0.0126199	-0.0845477	4
ENSMUSG00000026104	-0.156659	-0.0535909	-0.161003	-0.129599	-0.153337	0.0428155	-0.120665	0.196471	0.0663689	-0.0740702	4
ENSMUSG00000026103	-1.17778	-1.20559	0.764545	0.745324	0.213763	-0.184028	0.508391	-0.226419	-0.403047	0.269695	3
ENSMUSG00000099648	0.0790781	0.660559	2.23549	-0.151485	-0.0736061	-0.151485	-0.151485	-0.151485	-0.151485	-0.104342	1
ENSMUSG00000065192	-0.0888884	-0.0888884	-0.0888884	-0.0888884	-0.0888884	-0.0888884	-0.0888884	-0.0888884	0.101468	0.331482	4
ENSMUSG00000002881	1.00586	0.817921	1.53432	0.39893	-0.356295	-0.329949	-0.42242	-0.192837	0.0532142	0.474792	2
ENSMUSG00000097833	-0.0407673	-0.0473678	-0.0244697	-0.184328	-0.581842	-0.609184	-0.706192	0.255383	0.701722	1.12767	4
ENSMUSG00000101501	-2.10777	-2.10919	-1.64751	-1.49451	-0.908586	0.122748	0.561901	0.616968	0.151595	0.426359	6
ENSMUSG00000099878	-0.111008	-0.0364558	-0.111008	-0.0102659	-0.111008	0.0272045	0.0188016	-0.111008	0.0797658	-0.111008	4
ENSMUSG00000100007	-0.915656	-1.20432	-0.237576	0.24825	0.509718	-0.498881	-0.268308	0.271218	0.579877	0.0808662	4
ENSMUSG00000043015	0.380891	0.201887	-0.00140573	-0.145242	-0.174795	0.0657917	0.0480846	0.168174	-0.132143	-0.154707	4
ENSMUSG00000103630	-0.179056	-0.120921	0.306615	0.262623	-0.146162	0.0842061	-0.155553	0.152355	-0.044012	-0.126115	4
ENSMUSG00000041439	4.3202	3.43272	1.40471	0.549792	-0.0570913	-0.303379	-0.339993	-0.242834	-0.358961	-0.361176	5
ENSMUSG00000100302	-0.0950345	1.16684	-0.0950345	0.309169	0.0931087	-0.0950345	-0.0479994	-0.0950345	-0.0950345	-0.0950345	2
ENSMUSG00000026102	-0.0733646	-0.0720823	-0.234316	0.82964	0.0440394	-0.153105	-0.152261	-0.0367296	0.250013	-0.120136	3
ENSMUSG00000041426	-1.08443	-1.00136	-1.10235	-0.873091	-0.184203	-0.214384	-0.101698	0.517654	0.751318	-0.250653	6
ENSMUSG00000089802	-0.0926821	-0.0926821	-0.0847914	-0.0889401	-0.0869437	-0.065969	-0.0735035	-0.0854448	0.203976	-0.0905674	4
ENSMUSG00000043629	1.76542	0.862341	0.730006	-0.190398	-0.479956	-0.0661568	-0.379054	0.0938907	0.175479	-0.196925	2
ENSMUSG00000026100	2.43946	0.0780429	-0.0238622	-0.0188805	-0.0455202	-0.0758445	-0.0777075	-0.0647952	-0.0691363	-0.080723	2
ENSMUSG00000060715	-0.14137	-0.14137	-0.14137	-0.0514944	-0.14137	-0.14137	-0.135578	-0.0696998	0.318212	0.13117	4
ENSMUSG00000026098	0.716207	0.781927	-0.389418	-0.601738	-0.460342	-0.36895	-0.2357	0.824374	0.126613	0.0539395	2
ENSMUSG00000100763	-0.0873696	-0.0873696	-0.0873696	-0.0873696	-0.0873696	-0.0873696	-0.0873696	0.209318	0.0623374	-0.0873696	4
ENSMUSG00000026097	-0.473104	-0.654798	-0.732154	-0.714637	-0.701175	0.106565	-0.0997756	0.237309	0.166828	0.677876	6
ENSMUSG00000026096	0.14891	0.352696	-0.496524	-0.864558	-0.298625	-0.150066	-0.0409006	0.563124	0.178538	-0.191391	4
ENSMUSG00000099913	0.334869	0.0525599	-0.0151367	-0.100394	0.304995	-0.0990872	0.100272	-0.101763	-0.101763	-0.0577898	4
ENSMUSG00000101838	3.00062	4.79838	0.157178	-0.234526	-0.188491	-0.237575	-0.237575	-0.237197	-0.236579	-0.181506	5
ENSMUSG00000026095	-0.547334	-0.771574	-0.704378	-0.676721	-0.360506	-0.343085	0.154772	0.559629	0.110819	0.461879	6
ENSMUSG00000100267	-0.0941637	-0.0941637	-0.0483084	-0.0737142	-0.0818002	0.185875	-0.0730808	-0.0511182	-0.0647602	-0.0636516	4
ENSMUSG00000100069	3.49614	3.46621	1.33294	0.31831	0.0523401	-0.157151	-0.368636	-0.365753	-0.292416	-0.34772	5
ENSMUSG00000096141	2.73704	3.18245	2.27131	0.487327	0.158661	-0.390415	-0.310854	-0.270728	-0.367159	-0.390536	5
ENSMUSG00000092657	-0.225925	-0.225925	0.319741	1.48882	-0.135926	-0.154036	-0.00686946	-0.122111	-0.0253227	-0.0623366	3
ENSMUSG00000026094	-0.805719	-0.746628	1.20625	-0.332538	-0.484703	0.31894	0.253069	-0.0799751	-0.169962	-0.421981	4
ENSMUSG00000102405	-0.154905	-0.154905	1.04936	0.218871	-0.154905	0.019211	-0.135791	-0.113322	0.0521022	-0.154905	4
ENSMUSG00000042807	-0.119611	-0.0703203	0.224606	0.31427	0.620808	-0.0145998	0.0304267	-0.126564	-0.132082	-0.230318	3
ENSMUSG00000102868	-0.0661012	-0.0722058	-0.0584113	-0.0411112	-0.0710527	0.168919	-0.0697892	-0.0437263	-0.071577	-0.0638961	4
ENSMUSG00000094013	-0.101284	-0.101284	-0.101284	0.360032	-0.101284	-0.101284	-0.101284	0.195812	-0.101284	0.181196	4
ENSMUSG00000025983	0.154433	0.0158722	-0.00879505	-0.103389	-0.337101	-0.0795498	-0.126151	0.422103	0.107158	-0.212876	4
ENSMUSG00000041303	-0.282059	-0.246789	-0.0731574	0.582228	0.533216	-0.104803	-0.299672	0.191172	0.0792943	-0.0172654	3
ENSMUSG00000109809	2.89195	2.32137	0.820854	0.221635	-0.189204	-0.19318	-0.19318	-0.19318	-0.192324	-0.19318	5
ENSMUSG00000073678	0.611649	0.343226	-0.0530737	0.0174071	0.0666507	-0.212534	-0.224729	0.597103	-0.137141	0.0788407	4
ENSMUSG00000104136	-0.0980776	-0.109456	0.191354	0.834545	-0.152298	-0.124698	-0.14695	0.234707	-0.0660961	-0.0914991	3
ENSMUSG00000101130	0.16264	0.269416	0.0228101	-0.492566	-0.320655	0.496169	0.141632	-0.108031	-0.17416	-0.403095	4
ENSMUSG00000052331	2.61613	2.95617	2.44622	1.76331	-0.120628	-0.359459	-0.345132	-0.381006	-0.435971	-0.428305	5
ENSMUSG00000101674	-0.10638	0.369493	-0.10638	-0.0881648	-0.10638	0.123311	-0.10638	-0.10638	0.0743143	-0.10638	4
ENSMUSG00000102503	-0.12505	-0.12505	-0.0305227	1.0257	-0.12505	0.0120864	-0.12232	-0.12505	0.0866095	-0.12505	3
ENSMUSG00000102642	-0.172023	0.76864	0.0183573	-0.14191	-0.16326	-0.148044	0.043707	0.27846	-0.0563593	-0.172023	4
ENSMUSG00000025982	-0.0873122	0.102357	0.301589	1.61478	1.3791	0.166482	-0.101611	-0.733769	0.0408975	-0.791996	3
ENSMUSG00000103030	-0.0906604	-0.0906604	-0.088503	-0.0906604	-0.0906604	-0.0601381	0.0580777	-0.0906604	0.101528	-0.0906604	4
ENSMUSG00000025981	2.07137	2.8344	1.25783	0.0326723	-0.11127	-0.0051642	0.0719713	-0.425187	-0.530582	-0.234071	5
ENSMUSG00000101122	-0.165857	-0.217945	-0.0753991	0.171685	-0.151261	0.0925535	0.0314507	-0.161373	-0.0700448	0.30278	4
ENSMUSG00000025980	-1.33759	-1.36594	-1.49775	-1.37114	-0.93645	-0.518514	-0.432497	0.684002	1.23583	0.698198	6
ENSMUSG00000073676	-0.798453	-1.10692	-1.36065	-1.57939	-1.25581	-0.72198	-0.245183	0.873721	0.873429	1.24084	6
ENSMUSG00000100736	-0.423478	-0.480776	-0.222639	-0.242497	-0.512619	0.0604359	-0.316126	-0.180793	0.494893	0.453258	4
ENSMUSG00000089670	0.51051	0.442742	0.885395	0.40266	-0.328891	-0.300283	-0.358452	-0.0891718	0.379307	-0.0653011	2
ENSMUSG00000025979	1.306	0.762942	-0.475076	-0.657378	-0.225142	-0.0823684	0.614873	0.188093	-0.341356	-0.471818	2
ENSMUSG00000061863	-1.44383	-1.51134	-1.50138	-1.36111	-0.980753	-0.421665	-0.081739	0.788944	0.441079	1.48596	6
ENSMUSG00000025978	-0.37719	-0.342785	-0.408524	-0.24569	-0.00727442	0.672732	0.363184	-0.325609	-0.286421	-0.40818	4
ENSMUSG00000097649	-0.0548697	-0.0701882	-0.0701882	-0.0304941	-0.0701882	0.190513	-0.0701882	-0.0701882	-0.0701882	-0.0681058	4
ENSMUSG00000046994	-0.636082	-0.378127	0.270649	1.22397	1.7039	0.116225	-0.29286	-0.312442	-0.0974106	-0.352414	3
ENSMUSG00000025977	0.745448	0.673373	-0.142549	0.0937472	0.836398	-0.149034	0.0510303	-0.133349	-0.149307	-0.156891	2
ENSMUSG00000100215	-2.26379	-2.28913	-1.76169	-1.16598	-0.275089	0.414824	0.792211	0.40151	-0.2356	0.208005	6
ENSMUSG00000101945	-0.816391	-0.942633	-1.31844	-1.72314	-0.686768	-0.483974	0.322768	0.456434	0.223054	1.30375	6
ENSMUSG00000101085	0.935843	1.3118	0.210794	-0.349926	-0.389038	-0.372212	-0.382521	0.0480279	-0.149857	1.41631	2
ENSMUSG00000038349	-0.144248	-0.0524686	-0.0855604	1.26677	-0.144248	0.118726	-0.0512332	-0.144248	-0.0888583	-0.144248	3
ENSMUSG00000102145	0.12999	0.0821683	-0.212017	-0.617565	-0.728197	-0.616439	-0.616547	0.297431	0.268458	2.13946	4
ENSMUSG00000099950	0.385124	0.15864	2.5085	1.16814	0.148912	-0.216246	-0.23124	-0.232475	-0.232916	-0.232916	1
ENSMUSG00000100944	-0.506713	-0.506713	-0.184858	0.0842368	-0.140159	0.471038	0.296349	-0.161171	-0.337486	-0.11491	4
ENSMUSG00000101332	-0.126842	-0.126842	-0.126842	-0.0816601	-0.126842	-0.126842	-0.126842	-0.0297713	0.209642	0.265342	4
ENSMUSG00000045336	3.05775	-0.0742895	-0.0742895	-0.0742895	-0.0742895	-0.0742895	-0.0711728	-0.060612	-0.0742895	-0.0742895	2
ENSMUSG00000038331	-0.335851	0.0756845	-0.0515091	-0.454486	-0.866715	-0.191275	-0.0880519	-0.240932	0.212583	1.15743	4
ENSMUSG00000087022	0.117914	-0.0413618	-0.13098	-0.276457	-0.295684	-0.0512907	0.0451048	0.409842	-0.141871	0.0800522	4
ENSMUSG00000104310	-0.0893423	-0.0893423	-0.0893423	-0.0500512	-0.0893423	-0.0893423	0.112445	0.18145	-0.0893423	-0.0893423	4
ENSMUSG00000094128	-0.275315	-0.244637	2.64515	2.23471	0.0325571	-0.200376	-0.247168	-0.270766	-0.273544	-0.275315	1
ENSMUSG00000101429	-0.0974285	0.708911	-0.0227731	1.08924	-0.0974285	-0.0974285	-0.0974285	-0.0974285	-0.0767043	-0.0974285	3
ENSMUSG00000101129	-0.617077	-0.590558	-0.21075	-0.451037	-0.550238	0.316968	-0.358612	0.102536	0.128816	0.650249	4
ENSMUSG00000097519	-0.0980369	-0.230328	-0.195617	-0.286285	-0.171037	-0.215951	-0.0720043	0.395545	0.205606	-0.058501	4
ENSMUSG00000038323	3.13623	1.95165	0.919285	-0.0146062	0.254669	-0.240116	-0.261636	-0.167403	-0.136567	-0.251341	5
ENSMUSG00000048495	-0.564023	-0.712728	-0.751043	-0.610364	-0.36593	-0.124675	0.184605	0.537883	0.073712	0.0940752	6
ENSMUSG00000025971	-1.33678	-1.37224	-1.22506	-0.808088	-0.237007	0.111005	0.36361	0.377037	0.158567	-0.0776378	6
ENSMUSG00000088353	-0.0734921	-0.0734921	-0.0734921	-0.0734921	-0.0734921	-0.0226404	-0.0734921	-0.0734921	0.128015	-0.0734921	4
ENSMUSG00000101826	-0.632788	-0.632788	-0.190309	-0.4441	-0.107723	0.524424	0.311436	-0.306535	-0.17165	-0.137522	4
ENSMUSG00000102685	-0.34436	-0.368822	-0.0186644	0.349561	0.643841	-0.0718366	0.502921	-0.176784	-0.321803	-0.286519	3
ENSMUSG00000038305	-0.126966	-0.175182	-0.061755	0.242962	-0.0956822	0.205621	-0.130275	-0.188261	0.146293	-0.189214	4
ENSMUSG00000091283	-0.114263	-0.114263	-0.114263	-0.099404	-0.114263	0.375978	-0.00159752	-0.114263	-0.114263	-0.114263	4
ENSMUSG00000054770	-0.475183	-0.495556	0.482015	1.88234	0.899215	0.0839816	-0.271279	-0.337401	0.00555772	-0.428566	3
ENSMUSG00000026039	0.663624	0.15664	1.63539	1.92312	0.716492	-0.199918	-0.539363	-0.0692392	-0.199679	-0.170532	1
ENSMUSG00000063558	-0.147651	-0.144496	0.0228311	1.36527	-0.145678	0.00896249	-0.0530207	0.021883	-0.143092	-0.141661	3
ENSMUSG00000064294	1.0142	0.363681	-0.0717949	-0.085193	-0.0910117	0.136089	-0.0932269	-0.0938706	-0.0907786	-0.0912255	2
ENSMUSG00000038242	0.244164	0.615727	0.167505	0.0338882	0.272455	-0.101514	0.0629083	-0.105197	-0.0335721	-0.24993	2
ENSMUSG00000089822	1.08792	-0.204635	1.05777	-0.0902118	-0.175456	-0.124192	0.0433645	-0.0831632	-0.0676146	-0.204635	2
ENSMUSG00000079554	-0.171372	-0.120654	-0.0828045	-0.153043	-0.0933459	-0.0490763	-0.149661	0.0317621	0.193066	0.0156621	4
ENSMUSG00000103839	-0.154395	-0.211717	-0.113671	0.254943	-0.075972	-0.194245	-0.134623	-0.170183	0.469032	-0.0675819	4
ENSMUSG00000051223	-3.30769	-3.18374	-0.302471	-0.136513	0.324198	0.218887	0.352703	0.225443	0.262843	-0.404384	6
ENSMUSG00000026034	0.422404	-0.691188	-0.11961	0.294293	0.419409	-0.0737456	-0.120849	0.277323	-0.0837457	0.0315572	4
ENSMUSG00000026035	-0.941927	-0.791991	-0.977015	-0.799067	-0.416369	-0.138621	-0.170294	0.631414	0.330233	0.470468	6
ENSMUSG00000026036	-0.82848	-0.98967	-1.01956	-0.753231	0.239349	0.0814748	0.0222357	-0.0790088	0.471771	0.0263819	6
ENSMUSG00000026037	0.163901	0.774458	0.347445	0.580049	0.979764	0.0844074	-0.0355337	-0.699686	0.0223125	-0.411178	3
ENSMUSG00000094245	-0.109285	-0.109285	-0.109285	0.209047	-0.109285	0.120471	-0.109285	-0.00179243	0.0243546	-0.109285	4
ENSMUSG00000085054	-0.0968455	-0.0982922	-0.0754776	0.0336397	0.623413	-0.0402734	-0.0862916	-0.0269092	-0.0558143	-0.104972	4
ENSMUSG00000038174	0.756523	1.14282	2.00093	1.47482	0.856741	0.102763	-0.247788	-0.408379	-0.462756	-0.693483	1
ENSMUSG00000026032	-1.14879	-1.18037	-1.16243	-1.21736	-1.24856	-0.388499	0.0395413	0.889233	0.275253	1.16397	6
ENSMUSG00000100202	-0.384089	-0.384089	-0.31408	-0.29273	-0.330848	0.563085	0.395803	-0.284141	-0.268334	-0.197757	4
ENSMUSG00000059647	-0.847543	-0.841725	-0.637691	-0.154964	-0.360034	0.357855	0.333341	-0.067363	-0.167625	0.13034	4
ENSMUSG00000047528	-0.113255	0.0910688	1.1052	0.828268	-0.0935658	-0.113255	-0.113255	-0.113255	-0.10735	-0.113255	1
ENSMUSG00000102059	5.87894	3.13049	-0.00390063	-0.212207	-0.234078	-0.140015	-0.219961	-0.234078	-0.233557	-0.234078	5
ENSMUSG00000026031	0.904176	1.1145	0.784878	0.945154	0.7473	-0.27316	-0.41325	-0.359142	0.19346	-0.301083	2
ENSMUSG00000100236	-0.777809	-0.80115	-0.515883	-0.394846	-0.604922	-0.241582	-0.27093	0.0658552	0.606892	0.745839	6
ENSMUSG00000026029	5.09995	3.86356	0.100691	-0.213808	-0.246354	-0.1603	-0.247511	-0.248084	-0.247264	-0.248375	5
ENSMUSG00000102719	-0.116578	0.706326	0.0385569	0.996724	-0.0531382	0.0663775	-0.167641	-0.129762	-0.125803	-0.0968163	3
ENSMUSG00000099719	-0.113686	-0.113686	1.18046	0.872801	-0.113686	-0.113686	-0.113686	-0.113686	-0.0989859	-0.0805924	1
ENSMUSG00000026028	-0.491987	-0.362441	1.32899	2.19906	1.09572	-0.391707	-0.161786	-0.139937	-0.334235	-0.025599	1
ENSMUSG00000026027	2.02133	2.12565	2.89569	1.79786	-0.288709	-0.473786	-0.476539	-0.234581	-0.280103	-0.261694	5
ENSMUSG00000072295	-0.0547825	-0.032448	-0.0776734	-0.0781541	-0.00731767	-0.0254203	-0.0808538	-0.0808538	0.123239	-0.0808538	4
ENSMUSG00000099752	-0.146213	-0.146213	0.699305	-0.146213	-0.146213	0.144119	0.116128	-0.146213	-0.146213	-0.146213	4
ENSMUSG00000038079	0.448709	0.5392	-0.265458	-0.302109	0.14692	-0.0342914	-0.159166	-0.233132	0.296115	-0.0108026	4
ENSMUSG00000097573	-0.145027	-0.145027	0.115422	0.569203	-0.145027	0.298572	-0.124383	-0.12681	-0.100607	-0.127863	4
ENSMUSG00000079550	-0.277494	-0.161336	-0.147853	0.467986	-0.00147543	0.0485745	0.386652	-0.289882	-0.073277	-0.342272	4
ENSMUSG00000101586	-0.120042	-0.120042	-0.115163	0.521133	-0.120042	0.134389	0.0823584	-0.120042	-0.120042	-0.120042	4
ENSMUSG00000099563	-0.0953472	-0.0953472	-0.0953472	-0.0569295	-0.0409719	-0.00615142	0.122553	-0.077572	-0.0538345	-0.0953472	4
ENSMUSG00000026024	-0.737207	-0.51118	0.544771	2.00603	1.13138	0.45772	0.202439	-0.54095	-0.51088	-0.841308	3
ENSMUSG00000026023	1.6476	3.18295	1.36292	-0.08983	-0.221194	-0.2019	-0.220958	-0.227289	-0.212995	-0.227751	5
ENSMUSG00000099922	3.2743	4.23313	0.593745	0.343172	-0.302411	-0.233377	-0.29973	-0.30162	-0.20737	-0.282684	5
ENSMUSG00000104502	1.34228	1.30086	0.687944	0.991353	-0.159122	-0.157634	-0.159122	-0.159122	-0.156504	-0.159122	2
ENSMUSG00000041075	0.473771	0.101798	2.76756	2.91081	0.418101	-0.344348	-0.356223	-0.308467	-0.357356	-0.353812	1
ENSMUSG00000097819	-0.18894	0.0286273	2.03856	0.971149	-0.18894	-0.154165	-0.188195	-0.0685061	-0.18894	-0.18894	1
ENSMUSG00000047361	0.0904242	-0.0367839	0.042595	0.268445	-0.385704	-0.0414049	-0.347967	-0.109153	0.404974	0.150191	4
ENSMUSG00000099811	0.603841	-0.0822723	0.134117	0.925955	-0.0822723	-0.0822723	-0.0822723	-0.0822723	-0.0822723	-0.0822723	3
ENSMUSG00000026021	-1.58227	-0.742691	-1.20194	-0.793893	0.666148	0.460444	0.970745	-0.284953	-0.407378	-0.508773	6
ENSMUSG00000089276	-0.0684094	-0.0684094	-0.0684094	-0.0574388	-0.0356543	-0.0684094	-0.0684094	-0.0431837	-0.0684094	0.351108	4
ENSMUSG00000103821	-0.224522	-0.229885	0.0204653	-0.0125629	0.175473	-0.181637	0.262564	0.0478518	-0.0312014	-0.206203	4
ENSMUSG00000026020	-2.10033	-2.83367	-0.813034	-0.0899435	0.567313	0.433037	0.265662	-0.254941	0.31795	-0.280665	6
ENSMUSG00000077345	-0.175874	-0.175874	0.0382423	-0.171794	-0.118401	0.0766196	0.136002	-0.175874	-0.0311175	0.0491654	4
ENSMUSG00000089512	-0.298889	-0.235736	0.363527	0.289007	0.066318	0.149727	-0.0514735	-0.295121	0.0707081	-0.117799	4
ENSMUSG00000089093	-0.275959	-0.275959	-0.275959	1.46369	1.64389	-0.0487367	-0.0429654	-0.275959	-0.202452	-0.275959	3
ENSMUSG00000067336	1.70941	1.5686	1.66046	0.931156	-0.391351	-0.496546	-0.492732	0.5617	-0.251258	-0.10171	2
ENSMUSG00000104052	-0.143606	-0.142561	-0.137996	-0.130435	-0.142917	0.0681221	0.065941	-0.143075	0.121894	-0.143606	4
ENSMUSG00000103131	-0.0902622	-0.0902622	-0.0456377	0.827646	-0.0902622	-0.0902622	-0.0902622	-0.0902622	-0.0902622	0.330165	3
ENSMUSG00000041040	2.7915	2.7781	1.94608	1.08846	-0.0321613	-0.487829	-0.230638	0.17629	-0.505857	-0.556885	5
ENSMUSG00000103696	-0.306572	-0.140154	0.0696554	0.210047	0.701036	0.0507591	-0.0888867	-0.172068	0.0647854	-0.240655	3
ENSMUSG00000100901	-0.137164	-0.137164	0.0831328	0.303952	-0.105275	0.353438	-0.118763	-0.0844662	-0.120324	-0.117457	4
ENSMUSG00000026018	3.93892	3.01505	1.0863	0.297213	0.382633	-0.24126	-0.273538	-0.406024	-0.28936	-0.325312	5
ENSMUSG00000026019	-1.27675	-1.53296	-1.33132	-1.02257	0.240488	0.272756	0.385175	0.235721	-0.0533886	0.15669	6
ENSMUSG00000026017	-0.366983	-0.121507	-0.271144	-0.193007	-0.273704	-0.276007	-0.210231	0.38229	0.476924	-0.173472	4
ENSMUSG00000082609	-2.31401	-2.3061	-1.91202	-1.34994	-0.890934	-0.131583	0.488713	0.692191	0.195185	1.00401	6
ENSMUSG00000073664	0.311403	0.215465	1.0184	0.615327	-0.232164	-0.126126	-0.282567	-0.207318	0.312908	-0.331269	1
ENSMUSG00000049439	-0.606285	-0.570477	-0.269504	-0.400005	-0.354267	-0.160322	0.161539	0.525348	0.0713115	-0.145055	4
ENSMUSG00000103822	-0.132853	-0.132853	0.136638	-0.0440477	-0.132853	-0.0248242	-0.0174283	-0.11562	0.153767	-0.11894	4
ENSMUSG00000026782	-0.260412	-0.240344	0.451817	-0.0193715	-0.497374	-0.00208693	-0.135632	0.620941	-0.0851485	-0.209423	4
ENSMUSG00000026014	2.53523	2.46551	1.59428	0.652339	-0.0667683	-0.635421	-0.648762	-0.230817	0.100388	0.347449	5
ENSMUSG00000081562	-1.04619	-1.22716	-1.23495	-1.18668	-1.10797	-0.618316	-0.24547	1.17514	0.39232	1.45547	6
ENSMUSG00000084400	-0.10165	-0.10165	-0.10165	-0.10165	-0.10165	-0.10165	0.100383	-0.10165	0.0517597	0.000779316	4
ENSMUSG00000082160	0.246846	0.299053	0.117025	0.438011	-0.17175	0.00034055	-0.17175	0.0334238	0.064699	-0.17175	4
ENSMUSG00000103215	-0.128696	-0.125864	-0.133187	-0.136967	-0.137587	-0.133307	-0.0487945	-0.107958	0.369721	-0.129408	4
ENSMUSG00000084151	-0.105498	-0.105498	-0.105498	-0.104021	-0.102288	-0.105114	-0.0879187	0.192365	0.154299	-0.105216	4
ENSMUSG00000101188	-1.65022	-1.65464	-1.63895	-1.64913	-1.13314	0.731904	0.384039	0.103228	0.328831	-0.0201154	6
ENSMUSG00000026012	-0.218982	-0.218982	-0.214945	-0.208833	-0.218982	-0.117504	-0.098164	0.340216	0.233566	-0.146113	4
ENSMUSG00000086795	0.397237	0.0512794	-0.0775517	-0.0732095	-0.0775517	-0.0589286	0.12543	-0.0775517	-0.0775517	-0.0775517	4
ENSMUSG00000085965	0.548542	0.6821	1.4516	-0.155109	-0.155109	-0.155109	-0.155109	-0.155109	0.0364969	-0.155109	2
ENSMUSG00000104069	-0.109508	1.15078	-0.0726207	-0.0727177	-0.0548732	-0.109779	-0.0918452	-0.0950149	0.105891	-0.066842	2
ENSMUSG00000083118	-0.0805455	-0.0805455	-0.0805455	0.927509	-0.0805455	-0.0435813	-0.0805455	-0.0584222	-0.0572886	-0.0379173	3
ENSMUSG00000083355	-0.417218	-0.339124	-0.0579558	-0.480485	-0.578172	0.758309	0.0199319	-0.236378	-0.0515698	-0.233981	4
ENSMUSG00000026011	1.45542	3.6553	0.518845	-0.180116	-0.182128	-0.177358	-0.182128	-0.182128	-0.178598	-0.182128	5
ENSMUSG00000081382	-2.78611	-2.85342	-1.64797	-1.19319	-0.430542	0.361413	0.596569	0.321467	-0.0224425	0.676493	6
ENSMUSG00000080800	-1.05857	-1.21234	1.25046	-0.801761	0.175134	-0.240623	-0.183343	-0.015041	-0.178494	1.4258	4
ENSMUSG00000026009	-0.0649019	-0.0649019	-0.0649019	-0.0398094	-0.0649019	0.163846	-0.0649019	-0.0649019	-0.059931	-0.0649019	4
ENSMUSG00000102561	-0.169512	0.170192	1.28396	0.130025	-0.169512	-0.0952633	-0.169512	-0.169512	0.120296	-0.169512	4
ENSMUSG00000082804	0.234725	-1.0075	-0.804408	-0.489665	-0.549014	0.0129321	0.133114	0.0943483	-0.218602	1.27126	4
ENSMUSG00000082661	-0.13063	-0.0463904	0.277981	0.237878	-0.0573421	-0.116832	-0.0260451	-0.081513	0.0893063	-0.13063	4
ENSMUSG00000080785	0.0423533	0.170639	1.31025	-0.100524	-0.100524	-0.100524	-0.100524	-0.100524	-0.100524	-0.0651043	4
ENSMUSG00000085248	6.95439	0.580913	-0.135516	-0.134444	-0.135516	-0.131821	-0.135516	-0.135516	-0.135116	-0.135516	5
ENSMUSG00000085447	2.46713	0.0979666	0.140564	1.98478	-0.0760467	-0.171751	-0.179415	-0.175052	-0.140303	-0.186841	2
ENSMUSG00000086408	-0.0954758	2.14169	0.0428727	-0.0954758	-0.0954758	-0.0746812	-0.0954758	-0.0954758	-0.0954758	-0.0954758	2
ENSMUSG00000089546	-0.0986169	2.6176	-0.0986169	-0.0986169	-0.0986169	-0.0986169	-0.0986169	-0.0986169	-0.0986169	-0.0986169	2
ENSMUSG00000100965	2.7822	1.51302	1.30381	0.483139	-0.199589	-0.199589	-0.199589	-0.199589	-0.199589	-0.199589	5
ENSMUSG00000100381	-0.12153	-0.12153	-0.12153	-0.12153	-0.12153	-0.0214675	0.197177	-0.12153	-0.12153	0.3002	4
ENSMUSG00000086009	-0.0804862	-0.0804862	-0.0804862	-0.0575251	0.00202456	-0.0450119	0.152376	-0.0789228	-0.0804862	-0.0804862	4
ENSMUSG00000052062	1.92661	1.19795	1.17187	1.39333	0.191941	-0.11583	-0.265854	-0.268955	-0.265807	-0.264648	2
ENSMUSG00000104402	-0.156821	-0.156821	-0.156821	0.280525	-0.156821	0.0896453	0.19728	-0.0372694	-0.12032	-0.156821	4
ENSMUSG00000104081	-0.0221885	0.344673	1.16485	0.0356181	0.289792	0.0576957	-0.114216	-0.197283	-0.163091	-0.197283	4
ENSMUSG00000103002	-0.105659	-0.105659	0.0369471	0.379222	-0.0769852	0.124015	-0.0442652	-0.105659	-0.0796856	-0.105659	4
ENSMUSG00000100344	-0.152567	-0.152567	-0.152567	-0.0244914	-0.152567	0.143952	-0.152567	-0.0714447	-0.152567	0.74384	4
ENSMUSG00000085019	0.688935	1.31038	0.924999	0.119102	0.172535	-0.136514	-0.16221	-0.153471	-0.152158	-0.165	2
ENSMUSG00000102359	-0.0703077	-0.0600666	0.206886	-0.0142528	-0.0943677	0.194293	-0.113506	-0.06606	-0.0448152	-0.135671	4
ENSMUSG00000100750	-0.767965	-0.766344	-0.436037	0.0993618	0.392004	0.453183	0.766639	-0.551759	-0.362454	-0.514532	4
ENSMUSG00000081950	-0.115251	-0.115251	-0.115251	-0.115251	-0.115251	0.0329077	-0.115251	0.182256	0.043573	-0.00733096	4
ENSMUSG00000084333	-0.954632	-0.93591	0.990232	0.302068	-0.536439	0.102616	-0.128981	0.0436754	-0.049699	0.291479	4
ENSMUSG00000025969	0.214102	-0.192318	-0.128263	-0.0346579	-0.200848	-0.0785568	-0.121683	-0.0572636	0.292745	-0.00350296	4
ENSMUSG00000100811	-0.0760831	1.18343	0.0859789	-0.0615372	-0.0760831	-0.075011	-0.0501986	-0.0760831	-0.0760831	-0.0760831	2
ENSMUSG00000103032	-0.0933913	-0.0542244	-0.0933913	0.0876987	-0.0933913	-0.0933913	-0.0933913	0.203473	-0.0804612	0.144945	4
ENSMUSG00000100426	5.15898	2.13754	-0.156517	0.61058	-0.191616	-0.191616	-0.191616	-0.191616	-0.191616	-0.191616	5
ENSMUSG00000040865	1.77112	2.0187	1.44074	0.859751	1.2647	-0.0343687	-0.321575	-0.584685	-0.232673	-0.709343	5
ENSMUSG00000081617	-0.478594	-0.43742	0.110324	-0.339467	-0.335362	0.68068	0.340056	-0.368878	-0.311316	-0.238815	4
ENSMUSG00000081429	-1.65338	-1.5983	-1.12901	-1.12606	-0.515069	0.290795	0.82904	0.20231	-0.237861	0.120863	6
ENSMUSG00000084799	-0.317999	-0.390655	-0.275353	-0.0434908	0.591884	0.0418231	-0.19255	-0.0709825	0.289289	-0.22007	4
ENSMUSG00000101599	-0.445522	-0.478386	-0.486358	-0.321523	0.702675	-0.169912	-0.0141466	-0.172118	0.513031	-0.347163	4
ENSMUSG00000025968	-1.60432	-1.56728	-1.71873	-1.26577	-0.288616	-0.288901	0.176655	0.422492	0.641047	0.492389	6
ENSMUSG00000077884	-0.0754969	-0.0754969	-0.0754969	-0.0754969	-0.0754969	-0.049726	-0.0754969	-0.0754969	-0.0350238	0.344315	4
ENSMUSG00000025967	-1.92098	-2.23034	-2.07223	-1.89322	-0.735628	0.125248	0.552456	0.541567	0.331297	0.438276	6
ENSMUSG00000064612	-0.319414	-0.319414	-0.319414	-0.24237	-0.105953	0.0462668	0.0557513	-0.0146227	0.0696691	0.148099	4
ENSMUSG00000064602	-0.417173	-0.456627	-0.432686	-0.237893	-0.0767126	0.0621512	0.192938	-0.195679	0.12027	0.0776718	4
ENSMUSG00000046856	3.13481	3.9991	0.744958	0.0234965	-0.136453	-0.299852	-0.299538	-0.255624	-0.146129	-0.29957	5
ENSMUSG00000094290	-0.140814	-0.140814	-0.140814	-0.008623	-0.140814	0.262999	-0.037061	-0.140814	0.050522	-0.140814	4
ENSMUSG00000086730	-0.264602	-0.264602	0.0620393	0.366596	-0.264602	-0.178958	-0.195756	0.230574	0.170209	0.136272	4
ENSMUSG00000102536	1.0807	-0.116193	-0.116193	1.28573	-0.116193	-0.116193	-0.116193	-0.116193	-0.116193	0.265129	3
ENSMUSG00000087561	-0.127587	-0.0707792	-0.127587	-0.125898	-0.127587	0.012093	-0.127587	0.170283	-0.0884163	0.344674	4
ENSMUSG00000027520	-0.120141	0.071616	0.618416	1.41404	0.119431	-0.424087	-0.0891461	0.154803	-0.081158	-0.0487733	3
ENSMUSG00000094214	0.0387993	0.237093	-0.0756754	-0.0756754	-0.0756754	-0.0756754	-0.0756754	-0.0756754	0.114432	-0.0595578	4
ENSMUSG00000081643	-1.07438	-1.50539	-1.48805	-0.868897	-0.68439	-0.106366	-0.0465104	0.35798	0.388881	1.11214	6
ENSMUSG00000025964	-0.100633	-0.108997	-0.105038	-0.00290353	-0.130083	-0.126276	-0.11888	0.135301	-0.113877	0.59176	4
ENSMUSG00000069085	-0.144381	-0.144381	0.0322359	0.282121	-0.144381	-0.144381	-0.144381	0.134125	0.0919671	0.195133	4
ENSMUSG00000025963	-0.0904053	-0.0904053	-0.0820328	-0.0904053	-0.0904053	-0.0850455	0.111403	-0.0904053	0.0999797	-0.0904053	4
ENSMUSG00000025962	-0.586205	-0.348202	-0.755898	-0.758761	-0.264722	0.0161639	-0.183166	0.564597	0.110205	0.371035	4
ENSMUSG00000025961	-0.0634296	-0.0634296	-0.0634296	-0.0626971	-0.0634296	-0.0634296	-0.0634296	-0.0604096	0.127041	-0.0634296	4
ENSMUSG00000080817	-0.261278	-0.261278	2.5103	-0.216684	-0.261278	-0.122775	-0.183379	-0.144984	-0.067612	0.0800154	1
ENSMUSG00000082373	0.910971	1.24257	-0.0831509	-0.0716375	-0.0706331	-0.0831509	-0.0831509	-0.0831509	-0.0703009	-0.0763515	2
ENSMUSG00000025959	3.08293	2.90522	2.28724	1.20234	0.0360406	-0.380003	-0.411568	-0.303035	-0.365247	-0.357857	5
ENSMUSG00000086836	2.4215	-0.104666	-0.104666	1.37632	-0.104666	-0.104666	-0.104666	-0.104666	-0.104666	-0.104666	2
ENSMUSG00000086721	-1.90726	-1.92869	-1.52204	-1.22818	-1.19369	-0.157694	0.082717	0.826603	0.293275	1.22796	6
ENSMUSG00000099658	-0.0884997	-0.0884997	0.752209	-0.0685882	-0.0884997	-0.0643899	-0.0343546	-0.0884997	-0.049875	-0.0612403	4
ENSMUSG00000025958	-0.762575	-0.625597	-0.331214	0.0824553	0.219685	-0.41433	-0.255441	0.220106	0.269286	0.724014	4
ENSMUSG00000025956	-0.535413	-0.513169	-0.476923	-0.197433	0.162338	0.00658102	-0.124445	0.183318	-0.00550572	0.485973	4
ENSMUSG00000100437	0.265635	1.4766	-0.0786866	-0.0388359	-0.0786866	-0.0786866	-0.0786866	-0.0786866	-0.0786866	-0.0786866	2
ENSMUSG00000087213	1.13106	1.21379	0.652715	0.887453	-0.623704	-0.499567	-0.123282	0.352457	-0.125229	0.0245321	2
ENSMUSG00000070871	1.08327	-0.0561397	1.01533	1.20397	-0.0595685	-0.329789	-0.208239	-0.0549088	0.0043084	-0.0296864	1
ENSMUSG00000045005	-0.717423	-0.716353	-0.468681	-0.527543	-0.120895	-0.26914	-0.251386	0.0383536	0.81186	0.0529807	4
ENSMUSG00000102140	0.0871067	-0.0906633	-0.100716	-0.0988367	-0.105266	-0.10449	-0.105266	-0.104284	0.250128	-0.0243084	4
ENSMUSG00000051344	0.633426	-0.0142459	-0.46836	0.594416	1.11684	0.257129	0.256298	-0.653843	-0.0408926	-0.754578	3
ENSMUSG00000097264	-0.470354	-0.470354	0.464799	0.249361	-0.0471823	0.226178	0.0390878	0.00441371	-0.208711	-0.115041	4
ENSMUSG00000084416	-2.801	-2.80106	-2.03033	-0.949531	-0.327732	-0.0293619	0.481576	0.56746	0.255806	0.684241	6
ENSMUSG00000077471	-0.0805825	-0.0805825	0.759466	-0.0716961	0.295824	-0.0805825	-0.0805825	-0.0805825	-0.0805825	-0.0805825	4
ENSMUSG00000025955	2.04293	1.05901	1.48953	0.840893	-0.140971	-0.0564787	-0.323354	-0.338661	-0.0501306	-0.338724	2
ENSMUSG00000090042	-0.102999	-0.338077	0.00582113	-0.296282	-0.325292	0.526612	0.171968	0.0261371	-0.324435	-0.280754	4
ENSMUSG00000070870	-0.372341	-0.372341	-0.372341	-0.359761	-0.367731	-0.203829	-0.346969	0.208999	0.568582	0.281587	4
ENSMUSG00000067299	-0.333888	-0.333888	-0.333888	-0.329731	-0.333888	-0.311485	-0.32425	0.0976966	0.547223	0.565766	4
ENSMUSG00000025952	-0.245927	-0.245927	-0.245927	-0.245823	-0.245927	-0.245927	-0.245927	-0.109185	0.198188	1.13508	4
ENSMUSG00000073658	-0.216021	-0.216021	-0.216021	-0.215534	-0.216021	-0.216021	-0.205165	-0.084621	0.0978211	1.04007	4
ENSMUSG00000100774	1.89083	1.53075	0.444816	-0.423494	-0.601227	-0.606609	-0.547164	1.10129	0.0327801	0.0988586	2
ENSMUSG00000044429	-0.0937344	-0.0937344	-0.0937344	-0.0937344	-0.0937344	-0.0937344	-0.0785783	-0.0892304	0.253223	-0.0937344	4
ENSMUSG00000044816	-0.21535	-0.0641297	-0.22518	-0.214661	-0.22466	-0.169185	-0.123693	0.0197189	0.371406	0.0204358	4
ENSMUSG00000025950	-0.856469	-0.670265	-1.17233	-1.19534	-1.25234	-0.0556755	0.0837769	0.717538	0.329271	0.364803	6
ENSMUSG00000025949	1.54724	1.5864	1.94863	0.766336	-0.215531	-0.103081	-0.0590867	-0.174501	-0.425069	-0.456588	2
ENSMUSG00000025946	-0.113487	1.3322	0.758	-0.100625	0.0290959	-0.113487	-0.113487	-0.113487	-0.10499	-0.113487	2
ENSMUSG00000100503	-0.436557	-0.436557	1.13434	-0.381846	-0.371856	0.705939	0.0668187	-0.326567	-0.261517	-0.366143	4
ENSMUSG00000100504	-0.31653	-0.324365	2.80929	-0.199031	-0.233742	-0.198187	-0.28495	-0.225432	0.149929	-0.079236	1
ENSMUSG00000099383	-0.117029	-0.117029	1.48399	-0.0354502	-0.117029	-0.0411042	-0.0271457	-0.117029	-0.117029	-0.117029	1
ENSMUSG00000100340	1.09403	2.02155	0.708663	1.03984	-0.198614	-0.0359158	-0.208137	-0.230389	-0.207579	-0.243675	2
ENSMUSG00000100439	-0.403401	-0.403401	0.830881	-0.324715	-0.275125	-0.172866	-0.0582754	0.0155612	0.0119506	0.471939	4
ENSMUSG00000099819	0.802559	0.260209	0.700632	-0.214054	-0.296764	0.118078	0.228776	-0.218218	-0.132553	-0.399739	2
ENSMUSG00000082774	-0.702092	-0.702892	-0.153424	-0.491943	-0.596025	0.386254	0.94924	-0.421276	-0.344255	-0.347994	4
ENSMUSG00000025945	-0.34967	-0.34967	-0.34967	-0.335566	-0.34967	-0.196577	-0.324889	0.154835	0.56257	0.269014	4
ENSMUSG00000081623	-0.400011	-0.345043	2.12242	0.0630005	0.138056	0.182393	0.0532283	-0.304859	-0.303916	-0.328558	1
ENSMUSG00000083242	-0.0542849	-0.985291	0.862436	0.181368	0.481914	0.661724	0.219184	-0.466682	-0.480557	-0.39786	3
ENSMUSG00000083289	-0.103114	0.756761	-0.103114	0.340586	-0.103114	0.126502	-0.103114	-0.103114	-0.103114	-0.103114	4
ENSMUSG00000015222	1.80158	2.72774	1.48374	0.834918	0.0438901	-0.256862	-0.199458	-0.241177	-0.341354	-0.342923	5
ENSMUSG00000088850	-0.0998686	-0.0998686	-0.0998686	-0.0998686	0.536666	-0.0998686	-0.027268	-0.0998686	0.090695	-0.0998686	4
ENSMUSG00000073656	-0.083446	-0.083446	-0.083446	1.0327	-0.083446	-0.083446	-0.083446	-0.083446	-0.00129133	-0.0674416	3
ENSMUSG00000055567	2.19198	1.88891	0.370529	0.131544	0.0222302	-0.255095	-0.254647	0.0941681	-0.12155	-0.190848	2
ENSMUSG00000103375	-0.100996	-0.100996	-0.100996	1.40124	-0.100996	-0.100996	-0.0704678	-0.100996	-0.015118	-0.100996	3
ENSMUSG00000026005	-0.824201	-0.617017	-0.871809	-0.873499	-0.490848	-0.208813	0.257781	0.442535	0.279068	0.0318085	6
ENSMUSG00000026004	0.848097	0.816131	0.483628	0.217758	0.136668	-0.174657	-0.388	0.0732899	0.217314	-0.280854	2
ENSMUSG00000102559	-0.216493	-0.225607	-0.177233	-0.173009	-0.106957	-0.19098	-0.112576	-0.132809	0.442072	0.130948	4
ENSMUSG00000102374	-0.0837022	-0.0403101	-0.0257566	-0.127225	-0.154989	0.424303	-0.0948404	-0.154989	-0.154989	0.165215	4
ENSMUSG00000102776	-0.113964	-0.110191	-0.019475	-0.107417	-0.113718	-0.112912	-0.0627714	0.0677108	-0.0770036	0.415966	4
ENSMUSG00000082057	-0.0915205	-0.0915205	-0.0915205	-0.0575415	-0.0915205	-0.0839589	-0.0915205	-0.0915205	0.251213	-0.0894542	4
ENSMUSG00000103706	-0.0736478	-0.0736478	-0.0736478	-0.0698465	-0.0736478	-0.0520477	-0.0728977	-0.0580224	0.13956	-0.0736478	4
ENSMUSG00000103756	-0.101789	-0.101789	-0.101789	-0.0356326	-0.101789	-0.0971285	0.102511	-0.101789	0.122416	-0.101789	4
ENSMUSG00000103382	-0.102443	-0.0432734	-0.0984413	0.403077	-0.102443	-0.0985864	-0.0100676	-0.102443	0.0964621	-0.094518	4
ENSMUSG00000103553	-0.192541	-0.196042	-0.154926	0.242165	-0.18907	-0.0833225	0.0905208	0.104797	0.0618454	-0.189514	4
ENSMUSG00000026003	-1.53533	-1.6688	-1.76965	-1.76204	-1.50846	0.509324	0.181604	0.555578	0.440401	0.239372	6
ENSMUSG00000082769	-1.96617	-1.97135	-1.80559	-1.4206	-0.845087	-0.0784259	0.287006	0.699058	0.434857	0.567699	6
ENSMUSG00000089420	-0.161621	0.13451	-0.161621	-0.161621	-0.161621	0.0635417	0.0787319	-0.14645	0.141784	-0.161621	4
ENSMUSG00000077328	-0.179084	-0.179084	-0.179084	-0.175795	-0.179084	0.0997343	0.0109885	-0.00997063	0.0624811	0.0272039	4
ENSMUSG00000061816	-0.146952	0.275548	-0.146952	0.147071	-0.146952	0.069143	-0.074027	0.0124156	0.0445003	-0.146952	4
ENSMUSG00000094191	-2.07599	-2.11171	-1.73613	-1.20053	-0.719732	0.113308	0.489179	0.588272	-0.0232217	0.829072	6
ENSMUSG00000082212	-0.137266	-0.137266	0.339078	0.0520775	-0.137266	0.0547608	-0.137266	-0.137266	0.00356705	0.28512	4
ENSMUSG00000026000	0.579447	0.446276	0.39969	0.0822836	-0.297357	-0.464762	-0.515441	0.107556	0.313437	0.775348	2
ENSMUSG00000025991	3.17005	2.42867	0.971394	0.596141	-0.228278	-0.234215	-0.234215	-0.234215	-0.224524	-0.193854	5
ENSMUSG00000082473	-0.378292	-0.417068	0.565541	0.408143	0.518068	0.724787	0.0135574	-0.562543	-0.188283	-0.697257	3
ENSMUSG00000104395	-0.102998	-0.102998	0.369274	-0.102998	-0.102998	-0.102998	-0.102998	-0.102998	0.228903	-0.102998	4
ENSMUSG00000096031	0.691968	0.701655	1.4096	3.09196	-0.177262	-0.211875	-0.305312	-0.305312	-0.215811	-0.305312	1
ENSMUSG00000062209	3.16295	3.07739	0.759884	-0.101311	-0.21244	-0.21244	-0.207793	-0.211405	-0.195828	-0.21244	5
ENSMUSG00000083795	-0.376054	-0.376054	0.0371074	-0.252529	-0.280043	0.293218	-0.0776982	-0.0648256	-0.18759	0.568454	4
ENSMUSG00000104508	-0.128401	-0.128401	-0.128401	1.11122	-0.128401	-0.128401	-0.128401	0.245735	-0.0463009	-0.128401	3
ENSMUSG00000103642	-0.1143	-0.1143	-0.1143	1.14658	-0.1143	-0.0818069	-0.1143	-0.1143	0.119221	-0.1143	3
ENSMUSG00000103809	-0.375396	-0.239538	-0.253603	-0.326432	-0.375396	-0.234219	-0.300155	0.219555	-0.0768168	1.53753	4
ENSMUSG00000084332	-0.831311	-0.850158	-0.413643	-0.0741616	-0.569973	0.559191	0.256598	-0.134449	-0.142223	-0.0630729	4
ENSMUSG00000099804	-0.100369	-0.100369	-0.100369	-0.100369	-0.100369	0.195196	0.101638	-0.100369	-0.100369	-0.100369	4
ENSMUSG00000100354	-0.142417	-0.142417	0.702785	0.0750797	0.283471	-0.142417	-0.0973922	0.0204864	-0.0133985	-0.101229	4
ENSMUSG00000101156	0.0255083	-0.0947466	-0.0947466	-0.0947466	-0.0947466	0.134679	-0.0947466	-0.0947466	0.0737545	-0.0947466	4
ENSMUSG00000025997	0.574016	1.84492	0.987065	0.867679	-0.295952	-0.0476416	-0.191392	-0.295815	-0.0861931	-0.29758	2
ENSMUSG00000100815	-0.0724037	-0.0724037	-0.0724037	-0.0504624	0.0460583	0.156515	-0.0724037	-0.0724037	-0.0606203	-0.0724037	4
ENSMUSG00000099954	-0.0966718	0.0740397	-0.0866645	-0.0945415	-0.0951072	0.136911	0.0529779	-0.094974	-0.0825555	-0.086373	4
ENSMUSG00000053153	3.61869	2.34221	0.0584688	0.191181	0.110699	-0.0205766	-0.245358	-0.212321	-0.248468	-0.158944	5
ENSMUSG00000080524	-0.118086	0.588211	-0.118086	0.217789	0.562037	-0.118086	-0.118086	-0.118086	0.0728214	-0.118086	4
ENSMUSG00000101730	-0.442702	-0.380234	-0.163764	-0.364507	-0.643012	-0.589024	-0.584457	0.845607	0.32501	1.1912	4
ENSMUSG00000104287	-0.0815355	-0.0815355	-0.0815355	1.18547	-0.0815355	-0.0815355	-0.0815355	-0.0815355	-0.0815355	0.0210866	3
ENSMUSG00000075952	-0.125611	-0.125611	-0.125611	0.453974	-0.125611	0.104517	-0.125611	0.133445	-0.0128192	-0.125611	4
ENSMUSG00000045648	3.47419	2.17264	0.789614	-0.0922435	-0.185696	-0.185696	-0.181053	-0.181295	-0.177114	-0.185696	5
ENSMUSG00000026196	0.95019	0.188236	0.218443	2.08235	1.51676	0.00490783	-0.376411	-0.204894	-0.200235	-0.575111	3
ENSMUSG00000089965	-0.0762549	-0.0762549	-0.0679978	-0.0762549	-0.0762549	-0.0762549	-0.0762549	0.0323904	0.113863	-0.0762549	4
ENSMUSG00000101551	-0.971079	-0.946564	-0.184285	-0.364398	-0.627213	-0.128759	-0.334642	-0.0298539	0.523722	0.906186	6
ENSMUSG00000050296	5.32683	2.36866	-0.167192	-0.155541	-0.174735	-0.17042	-0.170985	-0.173935	-0.156038	-0.172757	5
ENSMUSG00000101617	-0.718445	-0.996584	-1.27926	-1.20635	-1.06075	-0.57107	-0.111032	1.13811	0.542529	0.680856	6
ENSMUSG00000026192	-1.18673	-0.989081	-1.43386	-1.42089	-0.530474	0.18092	0.0491205	0.482935	0.180719	0.628626	6
ENSMUSG00000026193	-0.097392	0.217759	-0.335988	-0.382301	-0.617361	-0.524244	-0.601907	0.274229	0.879743	0.51489	4
ENSMUSG00000073652	-0.0814769	-0.0010884	0.00198909	-0.129389	-0.131909	-0.0417576	-0.131909	-0.0876329	0.311479	-0.131909	4
ENSMUSG00000101834	-2.37618	-2.38049	-1.91457	-1.66452	-0.922751	0.0139148	0.604979	0.796683	0.131664	0.673359	6
ENSMUSG00000100319	-1.41104	-1.30217	-1.36648	-1.40505	-1.26595	-0.613067	0.229243	1.06093	0.446191	0.834426	6
ENSMUSG00000102689	-0.0561831	-0.0872433	-0.0751632	-0.0855109	-0.105048	-0.06749	0.183107	-0.0608936	-0.0571777	-0.105048	4
ENSMUSG00000099707	0.602535	-0.222347	-0.222347	-0.145872	0.402473	-0.0972888	0.0714916	-0.00355423	0.0534902	-0.172796	4
ENSMUSG00000101211	0.493456	1.15004	0.660238	1.79687	0.57636	-0.197644	-0.33061	-0.0586761	-0.202413	-0.299374	3
ENSMUSG00000101848	3.26812	0.153817	0.337325	-0.0997987	-0.0997987	-0.0997987	-0.0997987	-0.0997987	-0.0997987	-0.0997987	2
ENSMUSG00000101764	-0.108967	0.0988088	0.942562	0.901929	-0.108967	-0.108967	-0.108967	-0.108967	-0.108967	-0.108967	3
ENSMUSG00000059483	-1.60655	-1.63746	-1.1814	-1.13935	-0.499836	0.391732	0.442758	0.204161	0.0382362	0.156327	6
ENSMUSG00000101496	-2.27099	-2.3089	-1.62877	-1.32992	-0.677417	0.411896	0.513093	0.331432	-0.0492996	0.727062	6
ENSMUSG00000102123	0.793704	3.04752	1.3126	-0.176486	-0.190424	-0.190424	-0.189242	-0.188855	-0.189497	-0.190424	2
ENSMUSG00000039395	-1.57054	-1.555	-1.21871	-0.998503	-0.75758	-0.233592	-0.219337	1.10869	0.623333	0.185445	6
ENSMUSG00000094655	-0.0930092	-0.210476	0.0426488	-0.199905	-0.00887837	0.0313879	0.105201	-0.192146	0.0440412	0.0510445	4
ENSMUSG00000094050	-0.348108	-0.335499	-0.152	-0.340322	0.104266	0.204199	-0.0605276	0.0233463	-0.0949635	0.255202	4
ENSMUSG00000093956	-0.317366	-0.400704	-0.208588	-0.301048	0.0192372	0.312701	-0.0811911	-0.00473929	-0.102894	0.234772	4
ENSMUSG00000093843	-0.293591	-0.401497	-0.134109	-0.34531	0.168216	0.127096	-0.0814699	0.0170282	-0.0382277	0.292588	4
ENSMUSG00000026189	4.40768	3.56897	0.578138	0.533185	-0.262139	-0.311272	-0.328193	-0.33876	-0.119017	-0.285444	5
ENSMUSG00000026188	3.47738	3.36439	1.22932	1.09224	0.0777319	-0.327648	-0.330946	-0.330946	-0.328919	-0.330769	5
ENSMUSG00000026187	-0.317247	-0.108831	0.322847	0.295009	-0.155835	-0.585576	-0.55748	0.65034	0.47469	0.161097	4
ENSMUSG00000039372	4.15285	2.4942	2.17546	0.277086	-0.199092	-0.301734	-0.306299	-0.307148	-0.306456	-0.307401	5
ENSMUSG00000085812	-1.82354	-1.90623	-1.45424	-1.22192	-0.628454	0.252652	0.594869	0.380696	-0.0403104	0.389378	6
ENSMUSG00000039354	1.04676	1.48373	0.579936	-0.309446	-0.538853	-0.266475	-0.216247	0.422939	0.0166971	-0.212724	2
ENSMUSG00000110712	-0.220545	-0.273438	-0.185448	0.759227	-0.16834	0.344863	0.0552446	-0.2602	-0.0754764	-0.226802	3
ENSMUSG00000039342	2.77995	4.08804	0.513062	0.0547852	0.39216	-0.203081	-0.31692	-0.318509	-0.266371	-0.262099	5
ENSMUSG00000110487	-0.207302	-0.207302	1.01293	-0.207302	-0.207302	-0.169148	-0.0971463	0.384517	-0.00925978	-0.207302	4
ENSMUSG00000110596	-0.123606	-0.129574	1.28558	-0.117208	0.571247	0.00318586	-0.129574	-0.129574	-0.129574	-0.129574	4
ENSMUSG00000046330	-2.62985	-2.70167	-1.94251	-1.01067	-0.712569	0.0373472	0.573427	0.645837	0.15217	0.632809	6
ENSMUSG00000039323	-0.243183	-0.242018	0.0106961	0.740939	-0.204621	0.144554	0.327713	-0.2322	-0.243183	-0.155277	3
ENSMUSG00000026185	2.48	1.68532	0.131769	0.488066	-0.136916	-0.0864937	-0.135543	-0.166077	-0.160459	-0.166077	5
ENSMUSG00000102266	-0.12458	0.803328	-0.121924	0.694857	0.164054	0.107507	-0.114468	-0.12458	-0.12458	-0.117433	3
ENSMUSG00000101112	-0.0977674	0.937548	0.868514	-0.0632605	-0.0977674	-0.0977674	-0.0977674	-0.0977674	-0.0977674	-0.0977674	2
ENSMUSG00000100697	-0.153314	-0.153314	1.93363	-0.0834866	-0.153314	-0.103735	-0.0765971	-0.153314	-0.153314	0.139579	1
ENSMUSG00000099877	-0.0992423	1.16316	0.434845	-0.0774774	-0.0992423	-0.0464843	-0.0620609	-0.0992423	-0.0992423	-0.0992423	2
ENSMUSG00000100044	-0.10542	0.774727	1.34574	-0.10542	-0.10542	-0.10542	-0.10542	-0.10542	-0.10542	-0.10542	2
ENSMUSG00000100444	-0.308688	-0.308688	0.285759	0.198768	-0.0269934	-0.11405	0.22228	-0.0876055	-0.0123004	-0.158331	4
ENSMUSG00000100301	-0.181145	-0.166433	2.35324	1.29966	-0.181145	-0.169978	-0.181145	-0.181145	-0.181145	-0.181145	1
ENSMUSG00000101344	0.05751	-0.161293	3.08428	0.576114	-0.0788612	-0.19956	-0.19956	-0.19956	-0.19956	-0.19956	1
ENSMUSG00000088666	2.34556	-0.0988123	-0.0988123	1.2084	-0.0988123	-0.0988123	-0.0988123	-0.0988123	-0.0988123	-0.0988123	2
ENSMUSG00000055322	-0.566458	-0.561874	-0.594633	-0.582909	-0.595094	-0.509893	-0.385545	0.676439	0.862378	0.0443521	4
ENSMUSG00000061815	-0.135774	-0.0120626	-0.135774	0.237071	-0.135774	-0.00547006	-0.134272	0.502563	-0.135013	-0.131074	4
ENSMUSG00000026180	-0.113728	-0.115815	-0.107905	0.23001	-0.0580496	-0.0626448	-0.0920748	-0.0856941	-0.0872312	0.435366	4
ENSMUSG00000048480	-0.0919992	0.0434591	-0.0864227	-0.0903051	-0.0919992	-0.0919992	-0.0919992	-0.0919992	0.0265815	0.379904	4
ENSMUSG00000087820	-0.111316	-0.111316	-0.111316	-0.103642	0.0799607	-0.107392	-0.111316	0.29959	-0.0827117	0.0962709	4
ENSMUSG00000094768	-0.134801	-0.134801	-0.134801	0.564485	-0.134801	-0.0786986	-0.0442417	0.0103836	0.0961932	-0.134801	4
ENSMUSG00000006304	-0.564427	-0.878967	-0.408115	-0.412111	-0.94667	-0.540634	-0.494296	0.258916	0.622809	1.59383	6
ENSMUSG00000064272	-0.0647236	-0.0647236	-0.0647236	-0.0635352	-0.0647236	-0.0647236	-0.0647236	-0.0573915	0.129121	-0.0647236	4
ENSMUSG00000006299	-1.11646	-1.02787	-1.67749	-1.6874	-0.903874	0.293486	0.26986	0.324614	0.397123	0.16067	6
ENSMUSG00000026179	-0.386192	-0.779356	-0.79771	-0.969855	-0.891732	-0.504077	-0.458611	1.01112	0.607596	0.752678	6
ENSMUSG00000103013	-0.210087	-0.210087	-0.172204	-0.196384	-0.203107	-0.0872926	-0.0823005	-0.00544224	0.304156	0.0589787	4
ENSMUSG00000006301	1.09683	0.179677	-0.0271681	-0.506499	-1.23502	-0.152593	-0.113338	-0.0231449	0.549902	0.0366544	2
ENSMUSG00000103403	-0.24657	-0.249207	-0.230811	0.0232044	0.970608	-0.0521824	-0.0390691	-0.0899415	-0.152754	0.286784	4
ENSMUSG00000073650	-0.114935	-0.119738	-0.119211	0.182795	0.0500903	-0.119835	-0.12154	0.448424	-0.120984	0.0288694	4
ENSMUSG00000026177	-0.262774	-0.219057	0.364479	0.331527	-0.0165102	-0.121001	-0.196441	0.422198	-0.0926995	0.00290264	4
ENSMUSG00000026176	1.00856	1.241	0.70348	0.352249	-0.0745896	-0.518072	-0.518284	-0.0946997	0.392964	0.25916	2
ENSMUSG00000065468	-0.117018	-0.117018	-0.117018	-0.048948	0.0679166	0.342159	-0.117018	-0.117018	-0.0145982	-0.117018	4
ENSMUSG00000026175	2.48987	2.85692	2.80967	1.47136	0.158112	-0.36197	-0.422018	-0.420723	-0.415979	-0.419956	5
ENSMUSG00000033364	0.542957	1.12334	1.42089	1.51935	0.950174	0.185636	0.118088	-0.755218	-0.441439	-0.904329	1
ENSMUSG00000103227	-0.470457	-0.497257	0.336976	0.312322	0.230499	-0.262373	0.322585	-0.0160833	0.00880383	-0.376611	4
ENSMUSG00000026174	-0.335179	0.134899	-0.5287	-0.105904	0.329168	0.222436	-0.274068	-0.4948	0.51298	-0.141329	4
ENSMUSG00000026173	-0.546034	-0.512192	0.961451	2.04627	0.626656	0.26223	0.211289	-0.552965	-0.458757	-0.561636	3
ENSMUSG00000026135	1.19369	1.40989	1.68567	2.06663	0.281925	-0.088759	-0.478049	-0.323112	-0.256614	-0.354209	1
ENSMUSG00000093155	-0.0817803	-0.0817803	-0.0817803	-0.0785755	-0.0817803	-0.0817803	-0.0320677	-0.0817803	0.158783	-0.0817803	4
ENSMUSG00000026172	-0.768665	-0.739789	-0.764041	-0.553133	-0.522659	0.287338	-0.142898	0.0629096	0.373916	0.148148	6
ENSMUSG00000026171	-0.206826	0.539046	-0.497961	-0.0427818	0.649086	0.286075	-0.00203234	-0.233525	0.0606526	-0.580389	4
ENSMUSG00000033276	2.15796	2.32311	1.56179	0.563882	-0.315698	-0.239621	-0.337399	-0.190522	-0.101674	-0.329067	5
ENSMUSG00000033257	2.34953	2.54621	2.05024	1.36684	0.870525	-0.468267	-0.417428	-0.352057	-0.314643	-0.421053	5
ENSMUSG00000026170	2.27455	2.14589	0.672634	-0.153765	-0.175309	-0.0695835	-0.173529	-0.175309	-0.172791	-0.171577	5
ENSMUSG00000006542	-0.219243	0.711272	0.368531	1.19525	-0.219243	-0.163545	-0.188007	-0.0920309	0.0643389	-0.0751359	3
ENSMUSG00000033227	-0.283923	-0.282825	-0.283923	-0.282628	-0.283923	-0.269293	-0.231433	0.125851	0.202702	0.889697	4
ENSMUSG00000099472	-0.0693275	-0.0300612	-0.0693275	-0.0693275	-0.0693275	-0.0657341	-0.0693275	-0.0693275	0.143019	-0.0693275	4
ENSMUSG00000026167	-0.0821767	-0.0584821	0.758005	-0.0676756	-0.0821767	-0.0821767	-0.00173358	-0.080645	-0.0693132	-0.0701681	4
ENSMUSG00000089964	-0.132564	-0.12934	0.45765	0.890746	-0.0325128	-0.132564	0.080482	-0.132564	-0.132564	-0.132564	3
ENSMUSG00000090071	0.289612	-0.104559	0.753749	0.0697906	-0.125842	-0.0964308	0.0989168	-0.114924	-0.114008	-0.125842	4
ENSMUSG00000055197	-0.104729	-0.104729	-0.100796	0.484634	-0.104729	0.253236	-0.104729	-0.102491	-0.0935165	-0.104729	4
ENSMUSG00000006546	-0.279999	0.298844	-0.279999	-0.0669031	-0.0408649	0.0217562	0.263653	-0.257282	-0.0371666	-0.00383846	4
ENSMUSG00000047021	-0.129343	-0.102044	0.211524	1.9162	-0.129343	-0.125675	-0.129343	-0.122139	-0.0152277	-0.129343	3
ENSMUSG00000089653	-0.0863601	-0.0863601	-0.0863601	0.922276	-0.06054	-0.037039	-0.0368734	-0.0863601	-0.0709603	-0.0780464	3
ENSMUSG00000006538	-0.137651	-0.137651	-0.099299	-0.0387847	-0.0731662	-0.053408	0.0156305	-0.137141	0.226161	-0.137651	4
ENSMUSG00000103145	-0.159311	-0.0736075	0.145264	0.0245506	0.235693	-0.159311	-0.145962	-0.159311	0.129426	0.29736	4
ENSMUSG00000026162	1.20824	1.08274	-0.272946	-0.371177	0.338069	0.148756	0.0293503	-0.318365	-0.0624826	-0.213231	2
ENSMUSG00000026205	-0.138907	0.165985	-0.0400246	0.651114	0.430134	0.139501	-0.230406	-0.076495	-0.0689488	-0.0494839	3
ENSMUSG00000033159	2.04542	1.99785	1.39194	1.36125	1.32609	0.127302	-0.146001	-0.650208	-0.490267	-0.968982	5
ENSMUSG00000049339	-0.969213	-0.984024	-0.281371	0.0461524	0.782917	0.639723	0.428233	-0.615011	-0.289801	-0.399438	3
ENSMUSG00000026197	-0.640437	-0.596574	-0.875201	-0.753446	-0.866803	0.324258	0.461693	-0.236377	0.24482	-0.199342	6
ENSMUSG00000026198	0.348887	0.331957	-0.462777	-0.599838	-0.472192	0.384358	0.269533	0.224648	-0.113187	-0.746514	4
ENSMUSG00000099519	2.42195	-0.104069	-0.104069	0.335865	-0.104069	0.110986	-0.104069	-0.104069	-0.104069	-0.104069	2
ENSMUSG00000033124	-0.543179	-0.504374	-0.56907	0.0916718	0.587378	1.1255	0.465714	-0.591485	-0.528046	-0.86726	3
ENSMUSG00000026199	-0.323449	-0.26569	-0.352725	0.376948	0.0230103	-0.258018	0.040954	0.130389	0.407341	-0.548199	4
ENSMUSG00000026200	-0.325665	0.181412	-0.0236966	0.00382556	0.179852	0.199856	-0.242605	-0.200328	0.171817	-0.0574578	4
ENSMUSG00000026201	-1.25285	-1.15699	-1.0594	-0.11597	1.22904	0.4392	0.275059	-0.350565	0.0297728	-0.491799	6
ENSMUSG00000026202	-0.917441	-0.739125	0.329377	0.1444	-0.519546	-0.117756	-0.402286	0.406526	0.757175	-0.71653	4
ENSMUSG00000096094	-0.0874029	-0.0415486	-0.0874029	-0.0874029	-0.0874029	-0.08381	-0.0840892	0.210381	0.0276975	-0.0872181	4
ENSMUSG00000026203	-0.467089	-0.294058	-0.647714	-0.210035	0.678823	0.128705	0.306509	-0.208792	0.0928318	-0.592475	4
ENSMUSG00000026204	-0.246226	-0.248092	-0.248092	-0.0302033	-0.12541	-0.242742	-0.0543683	0.917552	-0.0724338	-0.248092	4
ENSMUSG00000033061	-0.0967475	-0.0967475	0.216917	1.52847	-0.0817196	-0.0967475	-0.0967475	-0.0967475	-0.0967475	-0.0967475	3
ENSMUSG00000026209	-1.80602	-1.79255	-1.21263	-0.614451	0.163035	0.296269	0.210136	0.30743	0.0814285	0.0694643	6
ENSMUSG00000026208	-0.113925	-0.113925	1.57173	-0.0777744	0.0383406	-0.113925	-0.103385	-0.113925	-0.0376632	-0.113925	1
ENSMUSG00000026207	1.0386	0.196981	0.189586	0.243287	-0.0191957	0.304504	0.0215682	-0.204458	-0.229726	-0.229955	2
ENSMUSG00000033021	-0.462473	-0.498724	-0.652967	-0.665136	-0.608409	-0.378871	-0.20806	0.478037	0.366912	0.842421	4
ENSMUSG00000033007	1.74011	0.324165	1.84428	-0.0874757	-0.110797	-0.175224	-0.162287	-0.175224	-0.0623542	-0.175224	2
ENSMUSG00000032997	0.249656	-0.173441	-0.314459	-0.42574	-0.437031	-0.184221	-0.118642	0.400523	0.245433	0.0812622	4
ENSMUSG00000026211	-0.159135	-0.160021	-0.147371	-0.082808	-0.132686	-0.120173	-0.144257	0.229502	0.131179	0.118168	4
ENSMUSG00000051703	-0.146171	-0.197453	-0.19432	-0.192402	-0.197453	-0.0420723	0.294284	-0.173433	-0.171762	0.471733	4
ENSMUSG00000032968	-0.108707	1.70161	-0.108707	0.404644	-0.108707	-0.0532332	-0.108707	-0.108707	-0.0850064	-0.108707	2
ENSMUSG00000026213	-0.799106	-0.770623	-0.577579	-0.0228602	1.63513	-0.0567268	0.0521686	0.0160742	0.0483852	-0.399762	3
ENSMUSG00000006576	0.195875	-0.209846	-0.0985799	0.233177	0.309459	0.0690778	0.0658843	-0.085091	-0.0068317	-0.319352	4
ENSMUSG00000083244	-0.309071	-0.309071	1.13877	-0.223092	-0.295257	-0.010773	-0.0973658	-0.192343	0.0251504	0.289882	4
ENSMUSG00000082528	-0.0447382	-0.365948	0.552825	-0.296131	0.235111	-0.0953369	-0.231701	0.330476	-0.00863304	0.047651	4
ENSMUSG00000082012	-0.894384	-0.899411	-0.00608319	-0.27413	-0.676442	0.0590195	-0.229789	0.0104253	0.305553	0.641713	4
ENSMUSG00000100827	-0.107538	1.43526	-0.0948824	0.937024	-0.107538	-0.107538	-0.107538	-0.107538	-0.107538	-0.107538	2
ENSMUSG00000100553	1.92761	3.56296	1.53542	0.342827	-0.0740893	-0.278123	-0.278006	-0.27831	-0.27831	-0.27831	5
ENSMUSG00000100534	-0.299912	-0.299912	0.332572	-0.257505	-0.299912	0.0894264	0.206234	-0.161159	-0.107647	0.138339	4
ENSMUSG00000102904	-0.17705	-0.17705	-0.17705	0.152798	-0.0936639	0.150918	-0.12225	-0.141234	-0.0905373	0.535531	4
ENSMUSG00000026235	0.61243	0.289118	-0.146244	-0.469599	-0.888694	-0.0140127	-0.251209	0.503768	0.337843	-0.32195	4
ENSMUSG00000099141	-0.106743	-0.106743	0.476594	-0.106743	-0.106743	0.311723	-0.106743	-0.106743	-0.106743	-0.106743	4
ENSMUSG00000101849	-0.156354	-0.106432	-0.0908603	-0.103976	0.0431349	-0.0532706	-0.156354	0.259493	0.118069	-0.156354	4
ENSMUSG00000101506	-0.0668143	-0.0668143	-0.0465849	-0.0585932	-0.0609333	-0.0662129	0.143061	-0.065744	-0.0649241	-0.0668143	4
ENSMUSG00000102052	2.12005	3.01546	0.22133	0.721473	-0.196461	-0.196461	-0.196461	-0.196461	-0.194898	-0.196461	5
ENSMUSG00000004872	0.507209	-0.0435936	0.227549	0.403703	0.512187	-0.126251	-0.0110918	0.0897596	-0.163657	-0.161947	3
ENSMUSG00000032908	-0.129915	-0.0520805	-0.102663	-0.0168392	-0.135906	-0.114367	-0.00190325	-0.131175	0.240649	-0.0871856	4
ENSMUSG00000099561	-0.0861083	0.556251	-0.0861083	0.0794563	-0.0861083	-0.0861083	-0.0861083	-0.0861083	0.104196	-0.0861083	4
ENSMUSG00000102945	-0.085161	1.17548	-0.085161	0.0371242	-0.085161	-0.085161	0.0117366	-0.085161	-0.085161	-0.085161	2
ENSMUSG00000026245	0.599445	0.685683	-1.15371	-1.83799	-0.817285	-0.0656018	0.0351154	0.655283	0.331742	-0.122835	4
ENSMUSG00000101798	-0.15476	-0.100606	-0.15476	-0.15476	-0.15476	0.0807402	0.0616756	0.0965127	-0.0222974	-0.0725314	4
ENSMUSG00000104018	-0.164473	-0.164473	-0.164473	-0.163095	-0.162358	0.0734339	-0.0974866	0.000734298	0.17981	-0.0451431	4
ENSMUSG00000090486	0.149743	0.0142125	0.0331143	-0.0897984	0.907681	-0.0714777	0.082201	-0.148462	-0.113622	-0.15206	4
ENSMUSG00000012187	-0.262162	0.0298418	1.805	1.99717	0.432948	-0.109674	-0.260958	-0.262162	-0.260456	-0.262162	1
ENSMUSG00000099364	2.79329	2.19433	1.44939	-0.213891	-0.213891	-0.207015	-0.20328	-0.213521	-0.17865	-0.207763	5
ENSMUSG00000100562	0.672235	-0.01419	0.911785	-0.0846699	-0.0846699	-0.0798473	-0.0846699	-0.0846699	-0.0829532	-0.0846699	4
ENSMUSG00000032883	0.987463	0.771402	0.579574	1.97938	0.667821	-0.15724	-0.424427	-0.0826806	-0.0709838	-0.479418	3
ENSMUSG00000079470	-0.447687	-0.288932	2.38294	2.5185	1.11031	-0.279041	-0.269447	-0.33387	-0.321625	-0.461441	1
ENSMUSG00000099377	-0.773229	-0.665761	-0.427028	-0.299782	-0.027512	0.103805	-0.256014	0.289979	0.393871	-0.232283	4
ENSMUSG00000099706	2.4419	-0.0774719	-0.0774719	-0.020207	-0.0774719	-0.0774719	-0.0774719	-0.0774719	-0.0113008	-0.0774719	2
ENSMUSG00000047330	-0.103734	-0.103734	-0.103734	0.29781	-0.0724187	-0.0808643	-0.103734	0.0852035	0.0869026	-0.103734	4
ENSMUSG00000072978	-1.38708	-1.40287	-1.37838	-1.21696	-0.317113	-0.00527186	-0.0637995	0.122514	0.453597	1.04736	6
ENSMUSG00000050711	-0.0693202	-0.0553409	-0.0351797	0.958499	-0.0492008	-0.0693202	-0.0693202	-0.0693202	-0.0575028	-0.0693202	3
ENSMUSG00000099562	-0.982145	-0.978182	-0.573929	-0.580957	-0.852543	-0.0923531	-0.213203	0.175053	0.288705	1.24404	6
ENSMUSG00000054702	-0.497603	-0.302171	-0.338932	-0.419861	0.176655	0.44986	-0.225105	0.29189	-0.292954	0.302671	4
ENSMUSG00000102235	-0.0985643	-0.0961531	-0.0889421	-0.0733599	-0.0748965	0.121549	-0.0943096	0.200621	-0.0937313	-0.0939025	4
ENSMUSG00000073643	-1.4432	-1.41613	-1.49269	-1.34943	-0.869402	0.22186	0.0294088	0.315513	0.745437	-0.0328268	6
ENSMUSG00000104497	-0.146645	-0.146645	-0.146645	-0.146645	-0.146645	0.267304	0.225422	-0.146645	-0.146645	-0.146645	4
ENSMUSG00000026248	-0.773213	-1.0021	-1.79229	-1.2465	-0.0687877	0.398991	0.430388	0.1374	0.128125	-0.18717	6
ENSMUSG00000026249	2.03268	1.27572	-0.267453	-0.49779	-0.578666	-0.295335	-0.601846	0.292908	0.0569019	1.16935	2
ENSMUSG00000067106	-1.58779	-1.41002	-1.50992	-1.54942	-1.35999	-0.536182	0.230496	1.03437	0.509386	0.841057	6
ENSMUSG00000100397	-0.639246	-0.219655	-0.393464	0.0209938	0.767701	0.437727	0.0359763	-0.192018	-0.103307	-0.45737	4
ENSMUSG00000099753	-0.22128	-0.22128	-0.22128	-0.0516607	-0.22128	0.0872069	-0.172112	-0.0929641	0.299521	0.0408302	4
ENSMUSG00000096297	-0.108124	-0.108124	-0.108124	0.0892316	-0.0716173	0.247553	-0.0881006	-0.0989608	-0.0452959	-0.108124	4
ENSMUSG00000102518	-0.223367	-0.223367	0.492055	1.1485	0.242055	-0.204985	-0.0634203	-0.223367	-0.0359024	0.149567	3
ENSMUSG00000099552	0.0606056	1.31888	0.184103	0.271162	-0.446428	-0.194738	-0.17938	0.482188	0.103717	-0.57576	2
ENSMUSG00000043230	-0.142427	0.0961577	-0.16202	-0.163554	-0.245613	-0.0786148	-0.12175	-0.179325	0.53504	-0.245613	4
ENSMUSG00000101257	-0.12573	0.236149	0.0256798	-0.227058	-0.219016	-0.154724	0.164064	-0.218407	0.360511	-0.393093	4
ENSMUSG00000103404	-0.288525	-0.366151	0.892524	1.12716	-0.112702	-0.298131	-0.188045	0.0170568	-0.0251803	0.289747	3
ENSMUSG00000004364	-1.23646	-1.37172	1.34564	2.35035	1.25421	-0.3595	-0.106437	-0.173999	-0.230664	-0.0837294	3
ENSMUSG00000103076	-0.222162	-0.214505	0.136394	0.54797	-0.221845	-0.202208	0.177677	0.0233918	-0.0528167	0.0254734	4
ENSMUSG00000103525	-0.199336	-0.199336	-0.19827	-0.191392	-0.199336	-0.102169	0.0113838	0.41519	0.0262844	-0.0878084	4
ENSMUSG00000101722	-0.282838	-0.215688	2.67236	2.97281	0.0617698	-0.28117	-0.29524	-0.294567	-0.293771	-0.29524	1
ENSMUSG00000101483	-0.0819761	-0.0649902	0.25731	-0.0805999	-0.0819761	-0.060324	0.119663	-0.0814859	-0.081806	-0.0804951	4
ENSMUSG00000038608	1.44299	2.07411	1.09673	0.10061	-0.42175	-0.186017	-0.239257	-0.139731	-0.0466022	-0.135785	2
ENSMUSG00000103192	-0.065316	-0.065316	-0.0575701	-0.055461	-0.065316	0.163441	-0.0566964	-0.065316	-0.065316	-0.065316	4
ENSMUSG00000104488	-0.126661	-0.123704	-0.126661	-0.124679	-0.126661	-0.0627627	-0.126661	0.596381	-0.118141	-0.101846	4
ENSMUSG00000102721	-0.161683	-0.161683	-0.160649	-0.159809	-0.161683	-0.0261195	-0.161411	0.355848	0.163067	-0.157996	4
ENSMUSG00000099949	-0.123987	-0.526151	0.0286864	0.541214	0.0518056	-0.135326	-0.0141154	-0.0561995	0.0900711	-0.0157222	4
ENSMUSG00000099918	-0.258364	-0.258364	0.720784	-0.0246826	-0.00349589	0.281598	0.0929202	-0.183977	-0.186088	-0.258364	4
ENSMUSG00000054976	2.23597	3.23026	0.247858	0.196235	-0.208639	-0.147632	-0.21217	-0.210898	-0.206245	-0.0878633	5
ENSMUSG00000104029	-0.0847118	-0.0847118	-0.0847118	0.100967	-0.0847118	-0.0847118	-0.0847118	-0.0847118	0.187958	-0.0847118	4
ENSMUSG00000101986	0.016061	0.205251	1.32155	-0.148792	-0.294735	0.749325	-0.107265	-0.42489	-0.29483	-0.39523	4
ENSMUSG00000087008	-0.459525	-0.375732	0.58457	-0.373249	-0.569522	-0.284969	-0.516149	0.187954	0.112437	1.48047	4
ENSMUSG00000100561	-2.0396	-2.03699	-1.6891	-1.64524	-0.913822	0.0693064	0.344326	0.508389	0.445181	0.534327	6
ENSMUSG00000103571	-0.107525	1.15592	-0.107525	-0.107525	-0.107525	0.0673169	-0.107525	-0.107525	-0.107525	0.230452	2
ENSMUSG00000055980	3.23795	1.20347	1.46844	-0.0490635	-0.147054	-0.145308	-0.194834	-0.19407	-0.191427	-0.19884	5
ENSMUSG00000026142	0.630132	1.23792	-0.125785	-0.159858	-0.390353	-0.266656	-0.157337	0.17349	0.0882053	0.215636	2
ENSMUSG00000104493	-0.0922935	-0.0922935	-0.0922935	0.0819453	-0.0922935	0.0184977	0.117352	-0.0922935	-0.088633	-0.0562149	4
ENSMUSG00000100786	-0.308183	0.0500229	2.99258	1.45047	0.187894	-0.302575	-0.281915	-0.264912	-0.174078	-0.27381	1
ENSMUSG00000096779	-0.326734	-0.326734	1.91198	2.35168	0.616897	-0.290512	-0.133958	-0.247995	-0.297844	-0.311596	1
ENSMUSG00000067158	-0.0905231	0.156192	-0.0810396	0.158118	-0.0866915	-0.0600916	-0.0895544	-0.0627556	-0.0852994	0.332622	4
ENSMUSG00000079465	2.62403	4.03995	1.44123	0.377	-0.295144	-0.288474	-0.294165	-0.294433	-0.288274	-0.294088	5
ENSMUSG00000065055	-0.0888241	-0.0888241	0.751911	0.0473029	-0.0888241	-0.0102375	-0.0428956	-0.0888241	-0.0888241	-0.0888241	4
ENSMUSG00000097564	0.96277	2.38202	2.10819	-0.159833	-0.195036	-0.19429	-0.225992	-0.224575	-0.21774	-0.202191	2
ENSMUSG00000026150	2.78215	2.81616	1.84404	0.706977	-0.527054	-0.347892	-0.499276	0.0517936	-0.214926	-0.232342	5
ENSMUSG00000101450	-0.0703955	-0.0703955	-0.0703955	-0.0330881	-0.0703955	-0.0671188	-0.069293	-0.0594606	0.138335	-0.0703955	4
ENSMUSG00000026149	-0.205064	-0.192486	2.42705	0.981545	-0.0338218	-0.203138	-0.197315	-0.204237	-0.102585	-0.205064	1
ENSMUSG00000114299	-0.0924286	-0.0924286	0.598208	-0.0693978	-0.0924286	-0.0924286	-0.0924286	-0.0873772	-0.0924286	0.328089	4
ENSMUSG00000100170	-0.141599	-0.141599	0.114731	1.94411	0.188545	-0.141599	-0.141599	-0.131093	-0.13211	0.0181394	3
ENSMUSG00000100744	-0.281225	-0.416235	1.48981	1.12102	-0.0482115	-0.252287	-0.311709	-0.0836089	0.0323221	0.150764	1
ENSMUSG00000026159	-0.0411494	0.70975	0.59109	0.452551	-0.0561679	-0.721544	-0.156864	0.554398	-0.0251586	0.238725	4
ENSMUSG00000113880	-0.0901256	1.56067	-0.0597142	-0.0566305	-0.0901256	-0.0901256	-0.0901256	-0.0868075	-0.0252085	-0.0901256	2
ENSMUSG00000113973	-0.133403	0.261577	-0.133403	0.773223	-0.133403	0.0237303	-0.133403	0.0164355	0.0461541	-0.133403	3
ENSMUSG00000113846	-0.10995	-0.10995	0.92368	-0.10995	-0.10995	-0.10995	-0.10995	0.208255	-0.057611	-0.10995	4
ENSMUSG00000113084	-0.107688	-0.107688	0.962657	-0.107688	-0.107688	-0.107688	-0.107688	0.0973366	-0.0452436	-0.107688	4
ENSMUSG00000114011	-0.0922835	-0.0922835	0.74874	-0.0922835	-0.0922835	-0.0922835	-0.0922835	0.178232	-0.0922835	-0.0922835	4
ENSMUSG00000113097	-0.141231	-0.141231	0.371931	0.351484	-0.141231	-0.141231	-0.141231	0.392458	-0.036802	-0.141231	4
ENSMUSG00000101784	1.94829	3.49636	1.64498	0.441397	-0.158346	-0.13788	-0.351693	-0.207763	-0.360388	-0.328544	5
ENSMUSG00000038496	-0.535794	-0.532925	1.46728	2.35022	1.7099	0.0499187	-0.154107	-0.504944	-0.547835	-0.288723	1
ENSMUSG00000100432	-0.551281	-0.579972	-0.375946	-0.438876	-0.399148	0.311656	0.476428	-0.270091	-0.248798	0.224558	4
ENSMUSG00000100190	-0.0640401	-0.0640401	-0.0640401	0.942364	-0.0640401	-0.0640401	-0.0640401	-0.0599235	-0.0610889	-0.0640401	3
ENSMUSG00000113267	-0.0833403	-0.0833403	-0.0636421	0.936549	0.124887	-0.0833403	-0.0820983	-0.0168514	-0.0833403	-0.0833403	3
ENSMUSG00000104423	-0.133764	-0.133764	0.268786	0.0115501	-0.133764	0.0386127	-0.133764	0.166428	0.0505279	-0.133764	4
ENSMUSG00000101315	-0.105033	-0.105033	0.737053	-0.105033	-0.105033	-0.105033	-0.105033	0.120555	-0.00102174	-0.105033	4
ENSMUSG00000026166	-0.0890153	-0.0890153	-0.0890153	1.92879	-0.0890153	-0.0890153	-0.0890153	-0.0890153	-0.0890153	-0.0890153	3
ENSMUSG00000101173	-1.61857	-1.57883	-1.52601	-1.09863	0.0496589	0.472258	0.449447	0.0638675	-0.0429205	0.189988	6
ENSMUSG00000053161	2.83156	3.46038	2.47367	0.315421	-0.288438	-0.330864	-0.331133	-0.331319	-0.329778	-0.331319	5
ENSMUSG00000101896	-0.661243	-0.609232	0.346898	-0.449484	-0.573664	1.06964	0.333828	-0.460494	-0.389185	-0.482908	4
ENSMUSG00000026163	0.801639	0.0265538	0.748925	0.72301	-0.103333	-0.114769	-0.109537	-0.114769	-0.0914593	-0.0996296	2
ENSMUSG00000079140	0.260436	0.0420893	-0.53472	-0.478645	-0.0997325	-0.333012	-0.162864	0.189125	0.196751	0.71494	4
ENSMUSG00000100580	1.84987	1.77283	2.04739	0.0457507	-0.200783	-0.214415	-0.211427	-0.218762	-0.210207	-0.217204	5
ENSMUSG00000094946	-0.417858	-0.412005	2.6544	3.10524	0.76407	-0.202396	-0.284191	-0.406802	-0.411739	-0.411095	1
ENSMUSG00000045658	3.24922	3.9319	-0.0382743	-0.2283	-0.266035	-0.142253	-0.265014	-0.138607	-0.150588	-0.240901	5
ENSMUSG00000102750	-0.115895	0.133439	-0.115895	-0.0297069	0.606669	-0.115895	-0.0700987	-0.115895	0.10126	-0.0900523	4
ENSMUSG00000101934	-0.474812	-0.507818	-0.0280257	-0.394017	-0.347613	0.711059	0.547709	-0.410641	-0.360295	-0.437906	4
ENSMUSG00000036766	-0.232756	0.0806475	0.829723	2.5311	0.338083	-0.0270822	-0.240384	-0.23949	-0.239085	-0.237083	3
ENSMUSG00000104396	-0.193544	-0.166565	1.26706	0.442241	1.46183	-0.174247	-0.192363	-0.192808	-0.179821	-0.192297	3
ENSMUSG00000102481	0.306446	0.155756	-0.0939246	-0.040621	-0.139059	-0.09914	-0.113274	-0.0539378	-0.0645618	0.461035	4
ENSMUSG00000026219	1.59656	2.27533	1.9751	1.06284	0.188953	-1.01738	-0.492683	-0.0723356	0.277222	-0.183262	5
ENSMUSG00000103505	-0.283941	-0.284042	0.0312828	-0.218001	-0.211433	-0.207005	-0.15357	0.581254	0.0962684	0.00394344	4
ENSMUSG00000104503	-0.233943	-0.222742	0.0103713	-0.0700331	-0.236263	-0.135759	0.00334279	-0.00184709	0.207307	0.0617932	4
ENSMUSG00000073633	-0.206513	-0.034017	1.01721	2.00372	1.08619	-0.175014	-0.279217	-0.481438	-0.0296234	-0.281323	3
ENSMUSG00000026220	-0.162174	-0.171841	-0.168576	0.0285677	-0.0570691	0.250644	-0.171744	0.38116	-0.171099	-0.0738607	4
ENSMUSG00000118590	-0.133398	0.332393	-0.0913584	0.671485	1.31964	0.249758	0.195436	-0.391776	-0.426699	-0.460196	3
ENSMUSG00000099693	-0.579618	-0.83226	0.967157	1.36602	1.91036	0.765516	0.408846	-0.872548	-0.852102	-0.930482	3
ENSMUSG00000052477	-1.03694	-1.05934	1.42706	1.07213	2.23447	0.576804	0.307008	-0.835492	-0.713639	-0.875261	3
ENSMUSG00000064281	-2.68745	-2.709	-1.85231	-1.37377	-0.58783	0.191438	0.573172	0.548926	0.137663	0.565638	6
ENSMUSG00000118640	-0.0238598	0.123141	-0.191776	0.442689	0.797093	0.360121	0.192414	-0.387489	-0.312722	-0.412154	3
ENSMUSG00000061852	-0.185184	-0.159008	0.548403	0.694505	0.622863	-0.0236243	-0.257033	-0.257686	0.0862866	-0.184431	3
ENSMUSG00000089976	-0.454334	-0.474215	2.27528	2.45277	1.41517	-0.0741868	-0.231264	-0.477691	-0.45028	-0.462443	1
ENSMUSG00000101279	-0.465899	-0.237555	1.86838	1.99951	1.47382	0.0548508	-0.135174	-0.55022	-0.406189	-0.612677	1
ENSMUSG00000089844	-0.622485	-0.527758	1.78257	2.24084	2.49333	0.0105392	-0.221981	-0.542021	-0.537869	-0.600952	1
ENSMUSG00000073631	1.40062	-0.312583	1.13286	1.92445	1.78459	0.475587	-0.0194408	-0.681037	-0.739829	-0.771356	3
ENSMUSG00000072109	0.524052	-0.49062	1.76914	1.47623	1.15922	0.711656	0.2522	-0.813574	-0.847388	-0.905921	1
ENSMUSG00000090128	-0.44345	-0.786266	1.24688	1.05782	1.68113	0.880898	0.275406	-0.841355	-0.829062	-0.874836	3
ENSMUSG00000090186	-0.137388	0.270331	-0.122406	0.436263	0.956394	0.299176	0.22332	-0.371456	-0.368118	-0.420263	3
ENSMUSG00000089716	-0.268826	0.201464	2.38086	2.30639	1.75143	0.0709775	-0.125627	-0.693416	-0.612152	-0.729669	1
ENSMUSG00000118618	-0.127516	-0.125257	0.557706	0.375392	0.0884872	0.105325	-0.112654	-0.130049	-0.124711	-0.124387	4
ENSMUSG00000079457	0.10039	0.242079	-0.0355891	0.664077	1.37456	0.211081	0.154623	-0.407016	-0.386089	-0.438047	3
ENSMUSG00000090252	-0.407693	-0.394052	1.27366	0.690749	2.69541	-0.0864546	-0.256047	-0.365315	-0.312387	-0.398349	3
ENSMUSG00000079455	-0.812316	-0.91493	1.23908	1.35267	1.02803	0.977134	0.606762	-0.874872	-0.945042	-1.0716	3
ENSMUSG00000091199	-0.208283	-0.189547	0.783926	1.25683	1.23218	-0.101097	-0.278107	-0.34363	-0.00186583	-0.280858	3
ENSMUSG00000089652	-0.302419	-0.313252	1.34173	1.23819	0.782716	-0.158125	-0.19679	-0.100745	-0.149486	-0.315825	1
ENSMUSG00000089937	-0.391261	-0.355727	2.17067	2.2237	1.38501	0.00347614	-0.28223	-0.416449	-0.434432	-0.505066	1
ENSMUSG00000118591	-0.0610116	0.482493	-0.0975308	0.719022	1.03152	0.299287	0.113677	-0.393694	-0.354862	-0.447342	3
ENSMUSG00000101751	-0.460247	-0.185661	1.98095	1.99564	1.63858	-0.00470536	-0.198258	-0.557565	-0.347111	-0.661147	1
ENSMUSG00000089714	-0.144577	-0.148915	0.392583	0.369109	0.0163146	-0.100104	-0.114493	-0.0649816	0.0724321	-0.149946	4
ENSMUSG00000118607	-0.0501306	0.108963	1.01765	1.26033	2.65979	0.118481	-0.117388	-0.543315	-0.557944	-0.584307	3
ENSMUSG00000118632	-0.0662213	-0.153476	0.236187	0.954654	0.580103	0.0210647	-0.191705	-0.190574	-0.013306	-0.176157	3
ENSMUSG00000094127	-0.180866	-0.180866	0.358583	0.240913	0.568235	-0.0369782	-0.180866	0.0444647	-0.180866	0.243336	4
ENSMUSG00000070034	-0.461969	-0.779338	0.931764	1.23779	1.23552	1.03615	0.667626	-0.957935	-0.982498	-1.12932	3
ENSMUSG00000090103	-0.23199	-0.0271805	0.168576	0.23263	1.58138	0.105212	-0.0146062	-0.269314	-0.263628	-0.254717	3
ENSMUSG00000070031	-0.61376	-0.70322	1.68118	1.64275	2.27083	0.247653	0.0919696	-0.698161	-0.590741	-0.865038	1
ENSMUSG00000073628	0.521333	-0.388572	1.4908	2.4868	1.637	0.372244	-0.0600881	-0.676145	-0.695952	-0.756346	1
ENSMUSG00000090246	-0.147616	-0.149031	0.232977	0.516732	0.0203652	-0.100809	-0.098239	0.193957	-0.0946075	-0.149031	4
ENSMUSG00000026222	0.3006	0.0272409	0.293102	0.0717502	0.274644	0.0409031	-0.203026	-0.118495	-0.0321631	0.120493	4
ENSMUSG00000052760	-0.347785	-0.330206	0.398153	0.54539	1.41636	0.0790616	-0.15937	-0.0551328	-0.229825	-0.311793	3
ENSMUSG00000094834	-0.0804666	-0.129996	-0.190052	-0.151603	-0.10546	0.109299	-0.190052	0.0900878	0.209346	-0.190052	4
ENSMUSG00000100217	-0.264486	-0.195736	0.75801	0.397554	1.37066	-0.0609705	0.0471219	-0.264486	-0.26359	-0.264486	3
ENSMUSG00000092932	-0.155564	-0.12963	-0.0798845	0.293868	0.913671	-0.0661934	-0.0149783	-0.112108	-0.129558	-0.103106	3
ENSMUSG00000036707	-0.33029	-0.315007	1.31457	1.67197	1.16933	0.318686	0.479776	-0.780149	-0.672192	-0.870152	3
ENSMUSG00000026223	0.396755	0.25127	-0.297389	0.0117459	0.108343	0.290928	0.177446	-0.165719	-0.30252	-0.0694963	4
ENSMUSG00000026224	-0.174545	-0.174545	0.408442	0.315762	-0.174545	-0.136844	-0.159715	0.00766877	0.271971	-0.174545	4
ENSMUSG00000099767	-0.0643172	-0.0643172	-0.0643172	-0.0622435	-0.0643172	-0.0643172	-0.063899	0.239236	-0.0635598	-0.063165	4
ENSMUSG00000049608	0.157791	-0.0597404	-0.122136	-0.116767	-0.122136	-0.120238	-0.121704	0.110838	0.239426	-0.076055	4
ENSMUSG00000100108	0.868631	0.203679	0.152849	-0.12057	-0.100015	-0.111811	-0.138941	-0.126217	0.00396566	0.30568	2
ENSMUSG00000099342	-0.515118	-0.440356	-0.389432	1.43139	0.0564283	-0.094985	-0.142819	0.0627208	0.21584	-0.295797	3
ENSMUSG00000026226	-0.0886192	-0.0886192	-0.0886192	-0.0886192	-0.0886192	-0.0886192	-0.0886192	-0.0886192	0.101204	0.33174	4
ENSMUSG00000026227	-0.089364	-0.0979314	0.17034	0.913368	-0.100534	-0.100534	-0.10039	-0.100534	-0.100238	0.312493	3
ENSMUSG00000026229	0.545551	0.0132532	-1.44566	-1.29941	-0.684953	-0.00382287	-0.285764	0.70033	0.555263	-0.0475278	4
ENSMUSG00000077274	-0.211122	-0.163761	-0.132334	0.20622	-0.100649	-0.100311	0.17003	0.0373004	-0.076675	-0.0608213	4
ENSMUSG00000026228	-0.22658	-0.22658	-0.224206	0.107239	-0.225277	-0.129252	0.190736	0.331211	-0.0518956	-0.202895	4
ENSMUSG00000103272	-0.222644	-0.225699	-0.192597	-0.105506	0.0744209	-0.137705	-0.00717426	0.43954	0.0272961	-0.206368	4
ENSMUSG00000094638	-0.0783679	-0.0783679	0.761496	-0.0436173	-0.0783679	-0.0783679	-0.0783679	0.042101	-0.0783679	-0.0783679	4
ENSMUSG00000062590	0.524801	0.131391	0.0722429	0.304962	-0.107268	-0.215983	-0.293557	-0.0845298	0.37464	0.0680857	4
ENSMUSG00000087538	0.681701	0.132421	-0.0757526	-0.0890047	-0.0890047	0.179886	-0.0890047	-0.0890047	-0.0873336	-0.0890047	4
ENSMUSG00000079445	0.671424	0.483207	-0.271672	-0.529284	-0.436566	-0.540198	-0.638237	0.593482	0.343801	1.05809	4
ENSMUSG00000091806	-0.731116	-0.731116	-0.33168	-0.31729	-0.579416	0.232602	0.152308	-0.0677062	0.112658	0.10498	4
ENSMUSG00000026234	-1.48906	-2.50261	-2.11466	-1.24047	-0.257117	0.202	0.37979	0.495462	0.463928	-0.0814174	6
ENSMUSG00000104627	-0.0119057	-0.193043	-0.193043	-0.114674	0.297618	0.324927	-0.016988	-0.09727	-0.125856	-0.140526	4
ENSMUSG00000064823	-0.145557	-0.137815	-0.145557	-0.13255	-0.0716848	-0.0992444	-0.0333876	0.0317574	0.101467	0.0617744	4
ENSMUSG00000073627	-0.0898982	-0.171446	-0.115999	0.0391345	-0.062014	0.407683	-0.0146353	0.0795577	-0.186854	-0.266999	4
ENSMUSG00000110510	-0.0907327	-0.0907327	-0.0907327	-0.0656825	-0.0907327	0.138602	0.0246626	-0.024574	-0.0907327	-0.0907327	4
ENSMUSG00000026237	0.409345	0.465251	-0.0603667	-0.0847628	-0.0927037	0.151274	-0.0897294	-0.0927037	-0.0885283	-0.0927037	4
ENSMUSG00000036574	0.661219	2.01294	-0.094641	-0.0910638	-0.094641	-0.094641	-0.094641	-0.094641	-0.094641	-0.094641	2
ENSMUSG00000101328	-0.198317	-0.198317	0.386523	0.678349	-0.102173	-0.0926981	0.181927	-0.171849	-0.0826761	-0.153509	3
ENSMUSG00000026238	-2.93792	-2.98449	-1.72854	-1.23275	-0.315766	0.199865	0.512907	0.501503	0.449827	-0.0922088	6
ENSMUSG00000026239	3.98674	2.96896	0.222204	-0.0485035	0.0171847	-0.37733	-0.26536	-0.137204	-0.0771315	-0.145717	5
ENSMUSG00000102927	-0.10453	1.15854	-0.10453	-0.0925715	-0.099351	-0.0600991	-0.101023	-0.102411	0.0861214	-0.0306056	2
ENSMUSG00000026240	-0.584965	-0.272232	-0.0861883	-0.31516	-0.41766	0.286051	0.269551	-0.0622441	-0.0461392	-0.289637	4
ENSMUSG00000103609	-0.132941	-0.132941	-0.0449077	-0.113255	-0.105514	0.310991	-0.120165	-0.0711988	0.00258366	-0.0897403	4
ENSMUSG00000026241	-0.222476	-0.11603	-0.24728	-0.186307	-0.144258	0.596291	0.222657	-0.263007	-0.270014	-0.227021	4
ENSMUSG00000053333	0.570727	0.60946	0.066597	-0.328054	-0.465358	-0.386559	-0.375842	0.473861	0.248829	0.347469	2
ENSMUSG00000100225	-0.0764182	-0.0764182	-0.0764182	-0.0764182	-0.0764182	-0.0442138	-0.0710731	-0.074083	0.135752	-0.0554824	4
ENSMUSG00000100768	-0.127987	-0.128357	-0.11315	-0.108115	-0.122906	-0.125387	-0.0313934	-0.0532548	0.264573	-0.0115432	4
ENSMUSG00000104121	-0.117171	-0.1236	-0.102264	0.0518443	-0.0496608	-0.085698	-0.101315	-0.092884	0.22804	-0.0539324	4
ENSMUSG00000102383	-0.131476	-0.128958	-0.117639	-0.0994817	-0.128703	-0.106115	-0.128814	-0.0315325	0.211085	0.252587	4
ENSMUSG00000104400	-0.100732	-0.100732	-0.100732	-0.0984669	-0.100732	-0.100732	-0.100732	-0.100732	0.333433	-0.100732	4
ENSMUSG00000102293	-0.222607	-0.222607	0.668532	0.142951	-0.222607	-0.156784	0.0141628	0.264086	-0.0486622	-0.161398	4
ENSMUSG00000102649	-0.151936	-0.151936	-0.149119	-0.145864	-0.148574	-0.109426	-0.14168	0.0331685	0.292429	0.100984	4
ENSMUSG00000084106	-3.0794	-3.09422	-1.89309	-1.06663	-0.416612	0.355314	0.710562	0.377778	0.010025	0.489567	6
ENSMUSG00000102571	-0.128744	-0.127169	-0.0709708	-0.039966	-0.124308	0.110864	-0.0970691	-0.00327656	0.0775633	-0.114949	4
ENSMUSG00000099401	-0.138053	-0.138053	-0.0235141	0.743515	0.165406	-0.0967433	-0.138053	-0.138053	0.14625	-0.138053	3
ENSMUSG00000102956	-0.103865	-0.104961	-0.112764	-0.0865205	-0.10626	-0.0638666	-0.0645098	-0.0891691	0.235372	-0.107864	4
ENSMUSG00000103984	-0.116749	-0.116749	-0.116749	-0.0480538	-0.116749	-0.108687	-0.109795	-0.116749	0.315106	-0.0609814	4
ENSMUSG00000101940	-0.427415	-0.435231	-0.310371	-0.29943	-0.109245	1.18924	0.160954	-0.406039	-0.42788	-0.43549	4
ENSMUSG00000101625	-0.0743424	-0.0743424	-0.0736941	-0.0740096	-0.0707235	-0.0607039	0.172675	-0.0727931	-0.0740721	-0.0735374	4
ENSMUSG00000026246	-1.34238	-1.32701	-0.0468125	0.440463	0.49521	1.06992	1.01917	-0.510773	-0.892985	-1.17211	3
ENSMUSG00000079440	-0.460154	-0.460154	-0.159	-0.360986	-0.419014	1.06194	0.400553	-0.436545	-0.452091	-0.460154	4
ENSMUSG00000100940	-0.108117	-0.078926	-0.108117	-0.0522896	-0.108117	-0.0854482	0.228345	-0.108117	-0.0311268	-0.108117	4
ENSMUSG00000036500	-0.678496	-0.0438678	0.198713	-0.0125093	-0.0432174	0.942778	0.567822	-0.567056	-0.620736	-0.678496	4
ENSMUSG00000026247	0.194014	1.73385	0.00174781	-0.0702475	-0.0832715	-0.0912531	-0.094077	-0.0856233	-0.0756494	-0.094077	2
ENSMUSG00000036480	-0.0835339	-0.0835339	-0.0835339	0.944008	-0.0835339	-0.0266356	-0.0835339	-0.0835339	-0.0617963	-0.0158573	3
ENSMUSG00000026251	-0.062467	-0.0672958	-0.0599104	-0.0582909	-0.0672958	0.163585	-0.0614908	-0.0672958	-0.057065	-0.0672958	4
ENSMUSG00000026253	3.28293	3.58835	-0.151996	-0.159105	-0.171552	-0.178876	-0.178876	-0.174508	-0.169458	-0.178876	5
ENSMUSG00000026254	-1.92241	-1.96444	-1.83525	-0.540523	0.45292	-0.178254	-0.0499053	0.447932	0.423592	0.71462	6
ENSMUSG00000026255	-0.364686	-0.0974493	-0.298345	-0.313571	0.11017	0.747053	0.412559	-0.264692	-0.468935	-0.509723	4
ENSMUSG00000048000	1.14183	1.43109	-0.113167	0.446104	0.795901	-0.196054	0.00584636	-0.341933	0.0488898	-0.537212	2
ENSMUSG00000095281	-0.146139	-0.146139	-0.0567223	0.890552	-0.0958432	-0.0552679	0.0605272	-0.141312	-0.138517	0.1678	3
ENSMUSG00000079436	-0.179493	-0.179493	-0.179493	-0.0396056	0.652335	-0.147995	-0.140596	0.194115	0.0590971	-0.0258035	4
ENSMUSG00000089613	-0.194751	-0.194751	0.0780869	0.0266521	-0.194751	-0.0586007	-0.0359884	0.209949	0.0564785	-0.120914	4
ENSMUSG00000026258	-0.0956478	-0.0637192	-0.0956478	-0.0690699	-0.0956478	0.251942	-0.0290729	-0.0956478	-0.0956478	-0.0956478	4
ENSMUSG00000026259	1.68776	2.06622	1.80586	0.940059	1.39853	-0.347033	-0.27679	-0.401667	-0.404698	-0.40485	5
ENSMUSG00000079434	-0.0764987	0.314687	0.042507	0.11128	-0.0950144	0.139533	-0.0950144	-0.0950144	-0.0727553	-0.0950144	4
ENSMUSG00000091123	0.315917	1.44944	-0.614821	0.167059	-1.16665	-0.40503	-0.128101	0.233832	0.409911	0.155501	2
ENSMUSG00000090994	-0.3781	-0.538706	0.533607	-0.17685	-0.419153	-0.110313	-0.317841	-0.0014815	0.369921	0.343573	4
ENSMUSG00000026288	0.761718	0.800633	0.0693211	-0.613485	-0.978286	-0.38621	-0.306894	0.415442	0.737971	-0.473021	2
ENSMUSG00000026289	-0.34444	-0.557142	-0.245951	0.631344	1.61503	0.475176	0.0347341	-0.497527	-0.3382	-0.330895	3
ENSMUSG00000087968	-0.400466	-0.379758	-0.289642	1.00554	0.863903	0.208854	-0.0319048	-0.392218	-0.0576222	-0.218305	3
ENSMUSG00000089281	-0.106223	-0.243919	0.394343	1.77442	0.695185	-0.0731383	-0.176462	-0.243919	-0.0687578	-0.243919	3
ENSMUSG00000056055	-0.0859781	-0.191683	-0.0958287	0.1343	-0.0688397	-0.0521136	-0.0995181	0.121938	0.106738	-0.0913073	4
ENSMUSG00000070738	1.93994	1.84797	0.715974	0.382201	1.40898	-0.247533	-0.4308	-0.308941	-0.0074382	-0.473055	2
ENSMUSG00000101942	-0.0842709	-0.0842709	-0.0842709	0.031555	-0.0842709	-0.0842709	0.219844	-0.0842709	-0.0842709	-0.0842709	4
ENSMUSG00000103996	-0.198531	-0.197878	-0.194334	-0.131607	-0.182574	0.0642526	0.0633422	-0.193384	0.216963	-0.115428	4
ENSMUSG00000103591	-0.333409	-0.333409	-0.329934	0.101847	-0.253044	0.0406486	-0.0903534	0.114109	0.156794	0.0426499	4
ENSMUSG00000005501	-0.462161	-0.389758	-0.329155	-0.281298	-0.299659	-0.315319	-0.20474	0.184561	0.702018	-0.143595	4
ENSMUSG00000095942	-0.147727	-0.147727	-0.147727	1.3312	-0.147727	0.0829033	-0.147727	0.00665585	-0.0500419	-0.147727	3
ENSMUSG00000084021	-0.57807	-0.721975	0.052113	-0.61848	-0.132796	0.895995	0.718907	-0.771214	-0.396713	-0.525642	4
ENSMUSG00000118514	-0.0778846	-0.0778846	-0.0778846	0.3624	-0.0778846	-0.0778846	-0.0778846	0.218524	-0.0778846	-0.0778846	4
ENSMUSG00000090175	-0.118008	1.14674	-0.118008	0.27809	-0.118008	0.0236999	-0.118008	0.113389	-0.118008	-0.118008	2
ENSMUSG00000089675	-0.107973	-0.107973	0.703075	0.426423	-0.107973	0.121754	-0.107973	-0.107973	-0.107973	-0.107973	4
ENSMUSG00000090124	-0.0647814	-0.0647814	-0.0599164	-0.0551659	-0.0647814	0.168156	-0.0635345	-0.0647814	-0.0632432	-0.0647814	4
ENSMUSG00000090145	-0.0221671	1.19566	0.00653706	0.0908919	0.59486	-0.0872615	-0.0348421	-0.128612	-0.128612	-0.128612	2
ENSMUSG00000054545	-0.102123	0.15145	-0.102123	-0.102123	-0.102123	0.320653	-0.102123	-0.102123	-0.0679427	-0.102123	4
ENSMUSG00000082677	-0.0882572	-0.0882572	-0.0882572	0.288536	-0.0882572	-0.0882572	-0.0882572	0.0138139	0.102087	-0.0882572	4
ENSMUSG00000089943	-0.0924304	-0.0924304	-0.0924304	0.0118934	-0.0924304	0.131393	-0.0924304	-0.0924304	0.0979928	-0.0924304	4
ENSMUSG00000081488	-0.0645816	-0.0645816	-0.0645816	-0.0629225	-0.0645816	-0.0574914	0.137839	-0.0645816	-0.0636442	-0.0645816	4
ENSMUSG00000090171	-0.0741632	-0.0741632	-0.0741632	0.00197863	-0.0741632	-0.0741632	0.12732	-0.0741632	-0.0314502	-0.0741632	4
ENSMUSG00000081984	-0.26299	-0.303838	-0.223209	-0.218785	0.663543	0.445895	-0.222744	-0.0338027	-0.0342938	-0.268996	4
ENSMUSG00000089960	-0.0885339	-0.0885339	0.752177	-0.0761254	-0.0885339	-0.0885339	0.0999231	-0.0885339	-0.0885339	-0.0885339	4
ENSMUSG00000079429	0.278019	1.09964	-0.0199091	0.0119905	0.896585	-0.230194	-0.242257	-0.282497	0.309061	-0.286511	2
ENSMUSG00000044783	1.15429	0.968632	-0.488173	1.35156	0.969453	0.0171565	-0.596438	-0.315647	0.316954	-0.441484	2
ENSMUSG00000036251	-0.139551	0.570983	-0.0204465	-0.0346277	-0.139551	-0.11272	-0.0104744	0.242407	-0.107872	-0.12678	4
ENSMUSG00000099553	1.28972	0.885608	-0.055087	-0.110774	-0.110774	-0.110774	-0.110774	-0.110774	0.0799951	-0.110774	2
ENSMUSG00000100908	0.00317957	0.168758	-0.0108215	-0.0940394	-0.0947924	-0.0947924	-0.0947924	-0.0947924	0.201201	-0.0947924	4
ENSMUSG00000062310	0.228104	0.865597	-0.0457453	0.136865	-0.131565	0.141957	-0.126356	-0.129701	-0.0892845	-0.108487	2
ENSMUSG00000100798	1.10215	0.0990862	1.71406	0.189059	-0.174555	0.0754632	-0.233199	-0.225522	-0.107954	-0.240081	1
ENSMUSG00000104057	-0.152958	-0.152958	-0.0182176	-0.0905709	-0.152958	-0.152958	-0.0724794	-0.152958	0.424426	-0.116631	4
ENSMUSG00000049866	-0.191919	-0.176506	-0.145702	0.0333153	0.230271	-0.155258	-0.189405	-0.139047	0.117965	0.631177	4
ENSMUSG00000101736	-0.555094	-0.549913	0.81519	0.274879	-0.511971	0.369853	-0.105568	-0.155534	-0.174429	0.199748	4
ENSMUSG00000097398	-0.291198	-0.0912814	-0.158332	-0.26338	-0.209386	-0.0789046	0.356295	0.0792415	-0.161544	0.0368706	4
ENSMUSG00000101333	0.142666	-0.16226	-0.16226	-0.031964	0.104339	0.0958266	0.0280341	-0.107521	0.0208896	-0.0764166	4
ENSMUSG00000099378	-0.147881	-0.147881	0.133957	-0.0379226	-0.147881	0.0966518	0.00962175	0.136474	-0.0605301	-0.147881	4
ENSMUSG00000099544	-0.415215	-0.112132	0.678697	-0.384426	-0.244384	0.687446	0.209088	-0.362729	-0.310646	-0.426076	4
ENSMUSG00000036206	1.39628	1.23169	0.774029	-0.122721	-0.408933	-0.194055	-0.366218	-0.261796	0.33779	0.00303393	2
ENSMUSG00000102700	-0.556926	-0.50158	-0.47933	-0.486376	-0.349351	-0.262749	-0.319702	0.01288	1.01566	-0.207277	4
ENSMUSG00000102083	-0.632462	-0.647009	-0.0736077	-0.183975	-0.425075	0.220008	-0.178851	-0.0229714	0.092466	0.371872	4
ENSMUSG00000101288	4.17941	3.63217	0.424342	-0.221846	-0.22214	-0.22214	-0.22214	-0.22214	-0.22214	-0.22214	5
ENSMUSG00000055013	1.88449	1.72821	2.04928	1.4099	-0.0823382	-0.408232	-0.470278	-0.298378	-0.05015	-0.192598	5
ENSMUSG00000104114	-0.171202	-0.170428	-0.170221	-0.159389	-0.0634811	-0.0881004	0.221352	0.065656	-0.0265265	-0.128393	4
ENSMUSG00000088371	4.12366	-0.112294	0.730397	-0.112294	-0.112294	-0.112294	-0.112294	-0.112294	-0.112294	-0.112294	5
ENSMUSG00000101662	2.48633	0.466439	2.94782	-0.0201681	-0.228927	-0.227877	-0.222304	-0.228927	-0.211782	-0.228927	1
ENSMUSG00000102009	-0.115794	-0.112996	-0.115794	-0.105403	-0.100224	-0.0870003	-0.115794	0.34829	0.0352575	-0.100694	4
ENSMUSG00000103252	-0.171234	-0.143996	0.351677	0.374872	0.43948	-0.138348	0.048513	-0.16988	-0.0523575	-0.166447	3
ENSMUSG00000034486	2.63392	2.20346	2.11331	0.110627	-0.329489	-0.0319343	-0.206448	-0.365007	-0.316426	-0.379505	5
ENSMUSG00000092627	-0.0935639	0.500308	0.753249	-0.232621	0.0944597	0.0563909	0.232541	-0.234931	-0.228564	-0.236255	4
ENSMUSG00000067081	-0.0466997	-0.138752	-0.081547	0.0213374	-0.0881744	-0.0335655	0.107682	-0.138752	-0.0884738	0.253342	4
ENSMUSG00000026301	2.77313	2.75016	2.87849	0.356698	-0.103852	-0.35994	-0.259893	-0.342701	-0.361768	-0.420465	5
ENSMUSG00000044337	0.343521	0.262349	0.0850426	-0.288597	-0.348253	0.403232	0.0946541	-0.113532	-0.140315	-0.329584	4
ENSMUSG00000104087	-0.0647909	-0.0207549	-0.0647909	-0.0590662	-0.0647909	-0.0647909	0.138081	-0.0647909	-0.0647909	-0.0647909	4
ENSMUSG00000101028	-0.0686438	1.18994	-0.0686438	-0.0621176	-0.0686438	-0.0516625	-0.0597675	-0.0686438	-0.0646749	-0.0686438	2
ENSMUSG00000101997	0.29451	1.63551	1.03967	-0.125731	-0.125731	-0.125731	-0.125731	-0.125731	-0.123934	-0.125731	2
ENSMUSG00000103292	0.0286656	-0.104696	0.425181	-0.104696	-0.0996196	-0.103598	-0.104696	-0.104696	0.13062	-0.0243606	4
ENSMUSG00000034432	2.41177	2.31714	-0.847908	-0.489961	-0.423943	-0.565306	-0.162945	-0.0205685	0.211093	0.639902	2
ENSMUSG00000056128	2.43027	1.27139	-0.0929774	-0.0929774	-0.0929774	-0.0929774	-0.0929774	-0.0929774	-0.0929774	-0.0929774	2
ENSMUSG00000048126	3.12982	3.56259	2.05671	0.621488	-0.227439	-0.336299	-0.331422	-0.344666	-0.342934	-0.311205	5
ENSMUSG00000103061	-0.194764	-0.194764	-0.194764	-0.0745032	-0.194764	0.605517	-0.0265848	-0.194764	-0.134328	-0.194764	4
ENSMUSG00000026303	0.60839	0.0204018	0.451851	0.56478	-0.149089	0.0379963	-0.145136	-0.15089	-0.138724	0.270336	4
ENSMUSG00000026304	-0.470837	-0.483237	-0.543204	-0.560175	-0.579707	-0.4984	-0.244618	0.339538	0.724068	0.426081	4
ENSMUSG00000100791	4.81843	3.30205	1.06706	-0.0185166	-0.266573	-0.266573	-0.266573	-0.266573	-0.265257	-0.266573	5
ENSMUSG00000026305	1.14568	1.23345	0.3532	-0.385441	-0.790979	-0.673814	-0.78026	0.215428	0.547719	1.18944	2
ENSMUSG00000070732	1.10109	1.8774	0.818598	0.214817	-0.646568	-0.449436	-0.456218	-0.132078	0.499857	-0.0732787	2
ENSMUSG00000100018	-1.18016	-1.18016	-1.15562	-0.982511	-0.140543	0.385615	0.133038	-0.0267347	0.197961	0.275842	6
ENSMUSG00000034353	0.102042	0.000643455	-0.236618	-0.244608	-0.250625	0.580458	0.158761	-0.250625	-0.250366	-0.250625	4
ENSMUSG00000034343	-0.937633	-0.752397	-1.08848	-1.06943	-0.769629	-0.247513	0.369412	0.331837	0.00233495	1.05477	6
ENSMUSG00000083064	0.605775	1.29753	-0.161076	0.128361	0.468331	-0.25981	-0.296495	-0.120944	0.247473	-0.0607617	2
ENSMUSG00000026307	-0.526707	-0.474744	0.511893	-0.134249	-0.427819	-0.437322	-0.45904	0.138014	0.386825	1.00392	4
ENSMUSG00000090322	-0.202988	-0.202988	1.98764	0.870681	0.109191	-0.202988	-0.0151112	-0.202988	-0.202988	-0.179348	1
ENSMUSG00000049515	-0.0776995	-0.0776995	-0.0776995	0.965419	-0.0406849	-0.0661524	-0.0776995	-0.0669969	-0.0378554	-0.0776995	3
ENSMUSG00000026308	-0.123556	-0.153177	-0.135053	-0.151835	-0.153177	-0.152574	-0.0330845	0.381122	0.11488	-0.153177	4
ENSMUSG00000047443	0.150817	0.205712	-0.149789	-0.26243	-0.196231	-0.0577113	0.107863	-0.0909339	-0.0653913	0.353019	4
ENSMUSG00000026309	-0.586874	-0.628757	-0.658285	-0.688724	0.126997	-0.21269	-0.11437	0.326114	0.468006	-0.0178781	4
ENSMUSG00000100253	-0.0971885	2.21732	-0.0971885	0.197588	-0.0971885	-0.0971885	-0.0971885	-0.0971885	-0.0971885	-0.0971885	2
ENSMUSG00000067071	2.95298	1.02586	0.285299	0.221583	-0.0794866	-0.116883	-0.182549	0.0113973	-0.0978241	-0.228249	5
ENSMUSG00000055866	0.893515	1.11154	0.242652	-0.222526	0.189681	0.464511	-0.178235	-0.247702	-0.246697	-0.244753	2
ENSMUSG00000101911	-0.258523	-0.192516	-0.19132	-0.253169	-0.34515	0.179999	-0.0323184	-0.105549	-0.174597	0.782172	4
ENSMUSG00000100151	1.18941	0.273671	-0.0947154	0.0168941	-0.0947154	-0.0947154	-0.0947154	-0.0947154	-0.0947154	0.325898	2
ENSMUSG00000101958	3.38615	1.59227	0.756569	-0.0713123	-0.204719	-0.0695721	-0.089243	-0.269693	-0.20877	-0.187372	5
ENSMUSG00000034292	0.532204	0.0490345	-0.47796	0.0735028	0.296286	-0.0621128	-0.011873	0.126172	-0.0320684	-0.0388427	4
ENSMUSG00000026311	-0.263712	-0.218116	-0.289754	-0.286973	0.220319	-0.0716809	-0.138856	0.30864	-0.042974	0.330946	4
ENSMUSG00000007805	-0.0782193	1.48193	-0.0334334	-0.0782193	-0.0782193	-0.073423	-0.0673489	-0.0683035	-0.0782193	-0.0782193	2
ENSMUSG00000101414	-0.0646819	1.1934	-0.0280638	-0.0626432	-0.0646819	-0.0646819	-0.0646819	-0.0646819	-0.0646819	-0.0646819	2
ENSMUSG00000102745	-0.0634477	-0.0634477	-0.0600088	-0.0619271	-0.0634477	-0.0627269	-0.0634477	-0.0620619	0.126628	-0.0634477	4
ENSMUSG00000026313	0.160497	-0.19479	-0.498953	0.174267	-0.355406	-0.386038	-0.264153	-0.0293106	0.6999	0.176332	4
ENSMUSG00000103101	-0.0906528	-0.0906528	-0.0906528	-0.0876931	-0.0906528	-0.0881355	-0.0885539	0.207534	-0.0695592	0.181062	4
ENSMUSG00000102565	-0.0846615	-0.0846615	-0.0810263	-0.0829032	-0.0846615	-0.0843055	-0.0846615	-0.0846615	0.105615	0.184592	4
ENSMUSG00000026260	0.178759	-0.266074	-1.28136	-1.42009	-0.854968	-0.421869	-0.300122	0.566824	0.627988	0.998888	6
ENSMUSG00000067064	4.29193	2.57579	1.63375	0.186712	-0.252463	-0.26629	-0.274965	-0.276809	-0.26816	-0.275944	5
ENSMUSG00000057464	2.56067	-0.150682	0.818376	0.789022	-0.134853	-0.0972601	-0.139523	-0.150682	-0.100597	-0.150682	2
ENSMUSG00000042849	-0.0703843	-0.0703843	0.768814	-0.0654533	-0.0703843	-0.0593377	-0.0607461	-0.0703843	-0.0534898	-0.0703843	4
ENSMUSG00000046300	0.0225362	0.0161604	-0.0711587	-0.0711587	-0.0711587	-0.0711587	-0.0497411	0.225052	-0.0711587	-0.0711587	4
ENSMUSG00000062497	-0.104602	-0.0692046	-0.104602	-0.104602	-0.104602	-0.0656057	-0.0990184	0.261869	-0.00108178	-0.0434561	4
ENSMUSG00000063583	-0.406113	-0.362818	-0.356557	-0.0803856	0.207007	0.659801	0.207849	-0.335447	-0.267409	-0.298477	4
ENSMUSG00000061616	0.189547	0.577711	1.07337	0.523695	1.20943	-0.244293	-0.248572	-0.234612	-0.122985	-0.114867	3
ENSMUSG00000073616	0.284825	-0.386134	-0.296458	-0.5035	-1.0667	-0.677624	-0.341549	0.829995	0.0844903	1.65296	4
ENSMUSG00000044055	-0.0877846	-0.0877846	-0.0877846	0.00866106	-0.0772776	0.280883	-0.0877846	-0.08674	-0.0848774	-0.083629	4
ENSMUSG00000100546	2.17533	2.63246	0.194976	0.831612	-0.187098	-0.187098	-0.187098	-0.187098	-0.187098	-0.187098	5
ENSMUSG00000034220	0.546394	0.567335	0.271079	0.538129	0.561742	-0.0438618	-0.207129	-0.208971	-0.0322721	-0.0883788	2
ENSMUSG00000101995	-0.0473662	-0.0196766	0.0349219	0.293758	0.148434	-0.104517	0.0687621	-0.0971154	-0.06542	-0.0944543	4
ENSMUSG00000034212	1.19887	0.738845	-0.0932366	-0.0319412	-0.137004	-0.12941	-0.136548	-0.137004	-0.134313	0.569418	2
ENSMUSG00000047067	-0.213334	-0.218128	-0.136871	0.157384	0.984042	0.282283	-0.0730583	-0.211902	-0.215927	-0.0511819	3
ENSMUSG00000097251	0.056965	-0.127666	-0.1345	-0.1345	-0.130377	-0.0204688	-0.1345	0.110409	0.161797	-0.0171435	4
ENSMUSG00000026269	-0.198768	-0.319257	-0.182599	-0.342478	-0.277377	-0.00719426	-0.0923935	-0.0270803	-0.0460097	0.880993	4
ENSMUSG00000100632	-0.117243	-0.117243	-0.057214	-0.105266	0.146191	-0.101863	-0.11084	0.273314	0.0286234	-0.117243	4
ENSMUSG00000026270	1.2893	0.634809	0.109827	0.600272	0.02544	-0.0377614	-0.307553	-0.103384	0.246803	-0.434951	2
ENSMUSG00000026271	4.31553	1.97596	-0.021379	0.213423	-0.191122	-0.182904	-0.194119	-0.189558	-0.132075	-0.0447149	5
ENSMUSG00000045091	-0.138736	-0.0766801	0.592732	0.0973265	-0.138736	0.354469	-0.103692	-0.138736	-0.138736	-0.138736	4
ENSMUSG00000014602	0.349617	0.41041	1.06553	1.46998	-0.0115299	-0.117581	-0.18918	-0.187266	-0.161618	-0.18918	1
ENSMUSG00000101378	-0.0857913	1.17493	-0.0857913	-0.0766403	-0.0857913	-0.0361908	-0.0394106	-0.0857913	-0.0772176	-0.0479683	2
ENSMUSG00000026272	-0.0696982	-0.0696982	-0.0696982	0.112856	-0.0696982	0.159159	-0.0696982	-0.0696982	-0.0696982	-0.0696982	4
ENSMUSG00000034159	-0.0951159	-0.0951159	-0.0951159	0.0716576	0.625964	-0.0951159	-0.0951159	-0.0951159	0.095358	-0.0951159	4
ENSMUSG00000084989	-0.130908	1.34801	-0.130908	-0.130908	-0.130908	0.0927951	-0.0993491	-0.130908	0.0201573	-0.130908	2
ENSMUSG00000047793	0.308555	0.0213814	0.230503	0.212412	0.0104481	0.151917	0.0502964	-0.154795	-0.151841	-0.154288	4
ENSMUSG00000026273	0.472113	0.773924	-1.11388	-0.938681	-0.0754858	0.254863	0.268209	-0.281212	0.0381262	-0.0563972	4
ENSMUSG00000101172	0.76079	3.18877	-0.157996	-0.138386	-0.157996	-0.150372	-0.157996	-0.157996	-0.157996	0.216676	2
ENSMUSG00000100351	-1.33449	-1.69187	-1.38148	-0.671136	-0.319676	-0.00276762	0.238441	0.350831	-0.018712	0.995866	6
ENSMUSG00000026274	-0.455093	-0.3905	-0.334737	-0.3041	0.101806	0.0263779	0.0272293	-0.180138	0.29732	-0.065768	4
ENSMUSG00000026275	-0.237211	-0.373916	-0.794318	-0.00242472	-0.0107128	-0.341575	-0.297481	-0.110108	0.559026	0.736036	4
ENSMUSG00000106302	-0.192815	-0.192815	-0.192815	-0.192815	-0.192815	0.672256	-0.0148762	-0.192815	-0.192815	-0.116895	4
ENSMUSG00000098689	-0.111368	-0.111368	0.240082	0.0955634	-0.111368	0.0686552	-0.111368	-0.111368	0.0794125	-0.111368	4
ENSMUSG00000064389	0.00203068	-0.134583	-0.134583	-0.134583	-0.134583	-0.134583	-0.1062	-0.134583	0.470772	-0.134583	4
ENSMUSG00000034107	0.0344121	-0.0885114	0.109866	-0.113799	-0.105905	-0.0817176	-0.116989	-0.107091	0.298317	-0.116989	4
ENSMUSG00000034088	-0.442784	0.836359	1.15595	-0.312551	-0.743014	0.124925	0.294748	-0.244713	-0.0885473	-0.520182	4
ENSMUSG00000090489	-1.00446	-0.711607	-0.585616	0.503578	-0.799467	0.136675	0.149952	-0.069545	0.0467283	0.308143	4
ENSMUSG00000026276	-0.00828872	0.0113431	0.433813	0.293304	-0.123009	-0.0602512	-0.214268	0.0166776	-0.0239199	0.316287	4
ENSMUSG00000034066	0.962253	1.31146	0.253003	-0.082506	0.178144	0.158106	0.0359064	-0.237076	-0.216887	-0.343421	2
ENSMUSG00000103854	-0.193374	-0.194054	1.18517	0.399575	0.182289	-0.034351	-0.138798	-0.222823	0.0498446	-0.210762	3
ENSMUSG00000026277	1.49588	1.05734	1.27443	0.685164	-0.186002	-0.184543	-0.304352	-0.173474	0.0278365	-0.259278	2
ENSMUSG00000100927	-0.0518826	-0.063566	-0.063566	-0.063566	-0.063566	-0.063566	0.139973	-0.063566	-0.063266	-0.063566	4
ENSMUSG00000026278	-0.960916	-0.960882	-0.961187	-0.811414	-0.760577	0.822968	0.53668	-0.333826	-0.0825987	-0.228733	6
ENSMUSG00000026279	-0.747104	-0.653882	-0.70001	0.27269	1.63942	-0.0719408	0.155446	-0.32292	0.0764124	-0.280697	3
ENSMUSG00000101952	-0.291892	-0.185884	1.30547	1.88139	1.2583	-0.156073	-0.232372	-0.273605	-0.264871	-0.317272	1
ENSMUSG00000026280	-1.58823	-1.40661	-1.80763	-1.05178	-0.721282	0.507556	0.775191	-0.215752	0.508787	-0.867042	6
ENSMUSG00000026281	-1.6309	-1.66046	-2.07345	-1.50706	-0.953032	0.24088	0.593606	0.423621	0.179156	0.371841	6
ENSMUSG00000026283	-0.173552	-0.0905232	-1.16058	-0.968008	0.0202829	0.163157	0.230662	0.296238	0.0763752	-0.337104	4
ENSMUSG00000088961	-0.0732986	-0.0732986	-0.0732986	-0.0732986	-0.0732986	0.161133	-0.0732986	-0.0732986	-0.0242137	-0.0732986	4
ENSMUSG00000073609	-0.515193	-0.421945	-0.233449	0.121647	-0.437386	-0.141206	-0.155876	0.0199026	0.488694	0.0239195	4
ENSMUSG00000094651	-0.350793	-0.26978	2.85225	1.78367	0.908756	-0.340919	-0.346241	-0.293403	-0.256467	-0.22266	1
ENSMUSG00000101660	-0.36919	-0.309411	-0.26184	-0.311825	-0.365495	-0.131842	-0.159902	-0.0897652	0.614146	-0.0155108	4
ENSMUSG00000093805	-0.331639	-0.220863	2.86953	1.68783	0.899654	-0.337881	-0.342883	-0.292068	-0.259119	-0.21416	1
ENSMUSG00000099624	-0.345251	-0.296823	-0.224302	-0.24875	-0.341442	-0.148159	-0.169708	-0.114637	0.615744	-0.000727114	4
ENSMUSG00000073608	-0.360958	-0.257255	1.922	1.17004	0.992877	-0.294472	-0.261368	-0.226609	-0.119284	-0.212952	1
ENSMUSG00000034000	0.155428	-0.227946	-0.100335	0.0590988	0.469509	-0.227946	0.288266	-0.148765	-0.0251214	-0.114688	4
ENSMUSG00000100990	3.92497	1.67233	2.18201	-0.329702	-0.440794	0.0944095	-0.298555	-0.395799	-0.313332	-0.206543	5
ENSMUSG00000100347	4.52754	2.25546	0.331925	0.12202	-0.478164	-0.288485	-0.243625	-0.243302	0.124931	-0.339058	5
ENSMUSG00000100518	-0.158126	-0.158126	0.0750544	0.209562	0.119846	-0.145217	-0.128061	-0.0612244	0.169095	-0.0772637	4
ENSMUSG00000099592	-1.25408	-1.31888	0.185621	-0.14337	-0.306765	0.425974	0.138718	0.333034	-0.173658	-0.363738	4
ENSMUSG00000051185	-0.109292	-0.280945	-0.0745028	0.14803	0.07811	0.118977	-0.096615	0.37013	-0.198535	-0.0608909	4
ENSMUSG00000103973	-0.0687669	0.079405	-0.0762811	-0.0660189	0.672872	-0.0585994	-0.0703759	-0.0762811	-0.0652257	-0.0762811	4
ENSMUSG00000081051	-3.05289	-3.19669	-1.63804	-0.962558	-0.215109	0.209306	0.46393	0.424633	0.125605	0.690754	6
ENSMUSG00000040710	-0.0915061	-0.0901059	-0.0586998	0.0855472	-0.0482519	0.151252	-0.0627484	-0.0852604	-0.0483688	-0.0907383	4
ENSMUSG00000102718	-0.267519	-0.19803	-0.267519	-0.0717946	0.134512	-0.0484799	0.165937	0.0468646	0.0188357	-0.185739	4
ENSMUSG00000095955	-0.200976	0.504325	1.23137	0.235251	0.371083	-0.200976	0.0465411	-0.132626	-0.200976	-0.169246	1
ENSMUSG00000080345	-0.226865	0.00942288	-0.226865	0.114089	-0.226865	0.0832479	-0.226865	0.0151346	0.228672	0.0264919	4
ENSMUSG00000102658	0.128047	-0.12212	-0.0419206	-0.0317328	-0.12212	0.156216	0.0276024	-0.12212	-0.0495927	-0.102876	4
ENSMUSG00000095610	-0.14979	-0.14979	1.06369	0.0957897	0.350066	-0.0298855	-0.14979	-0.14979	-0.0189665	-0.112333	4
ENSMUSG00000100362	-0.266733	-0.319049	1.4856	1.47477	1.0435	0.590516	0.0361836	-0.598278	-0.649769	-0.69072	1
ENSMUSG00000040693	-0.937096	-0.945944	-0.172602	-0.145339	0.257007	0.875514	0.470504	-0.52965	-0.494701	-0.274089	4
ENSMUSG00000097814	-0.354997	-0.355493	0.477377	-0.185915	-0.228545	0.0199737	0.105274	-0.195185	0.115521	-0.0847785	4
ENSMUSG00000045463	-0.0622706	0.0122825	0.736326	-0.0657538	-0.105826	-0.105826	-0.105826	-0.0265107	0.0848499	-0.0874524	4
ENSMUSG00000097480	-0.645381	-0.636949	-0.0418796	-0.593689	-0.621306	-0.62759	-0.626063	0.360044	0.826515	1.07021	4
ENSMUSG00000100454	-1.2432	-0.878628	-1.15287	-1.01686	-0.660753	0.16994	0.0340544	-0.402866	0.950142	-0.0243644	6
ENSMUSG00000044757	-1.64248	-1.13223	-1.29063	-1.16112	-0.296018	0.564295	0.234345	-0.559854	0.670742	-0.257903	6
ENSMUSG00000026331	-0.0918057	-0.0918057	-0.0918057	-0.0918057	-0.0918057	-0.0182596	-0.0918057	-0.0918057	0.198857	-0.0918057	4
ENSMUSG00000100484	3.30189	2.33507	0.549197	-0.146295	-0.169021	-0.169021	-0.169021	-0.169021	-0.169021	-0.169021	5
ENSMUSG00000101348	1.80038	1.1811	1.14672	0.360072	-0.172199	-0.121774	-0.172199	-0.172199	-0.172199	-0.162218	2
ENSMUSG00000044768	3.30422	3.41937	2.12628	0.79484	-0.0417444	-0.251532	-0.347568	-0.377954	-0.416575	-0.419849	5
ENSMUSG00000040648	1.11134	1.44477	1.73751	0.348574	-0.499459	-0.15527	-0.443824	0.0100862	0.00110871	-0.1969	2
ENSMUSG00000026333	-0.777256	-0.791361	-0.739264	-0.443259	-0.0747901	0.317699	0.0792816	0.0153048	0.119516	-0.0419504	4
ENSMUSG00000026335	-0.0983148	-0.0209813	0.148099	0.0929683	-0.178489	0.119729	-0.0989139	-0.0564492	-0.115665	0.151735	4
ENSMUSG00000104140	-0.0744008	-0.0744008	-0.0744008	-0.0627716	-0.0744008	-0.0656909	-0.0744008	-0.0744008	-0.0599824	0.418793	4
ENSMUSG00000089782	-0.377794	-0.526316	-1.39108	-2.0548	-0.581138	-0.733508	0.126123	0.669864	0.428318	1.31627	6
ENSMUSG00000089706	-0.0954154	-0.0490919	-0.0933997	0.00833698	-0.096982	0.137803	-0.0958278	0.203411	-0.0948883	-0.0955619	4
ENSMUSG00000096085	-0.113072	-0.113072	-0.113072	0.00569006	-0.113072	0.11677	-0.0532684	-0.0568504	0.0372417	-0.113072	4
ENSMUSG00000100182	-0.129789	-0.129789	0.164363	1.48462	-0.129789	0.102218	-0.129789	-0.129789	-0.0910264	-0.129789	3
ENSMUSG00000100711	0.110646	0.0259915	0.899005	0.758424	-0.103339	-0.103339	-0.103061	-0.100703	-0.100997	-0.103339	3
ENSMUSG00000097608	-0.473811	-0.635811	-0.0965982	-0.482	-0.675755	-0.647661	-0.722487	0.483808	0.829687	1.10917	4
ENSMUSG00000099634	-0.780035	-0.891146	0.0349984	1.55046	0.882175	0.717064	0.21391	-0.408173	-0.543755	-0.7323	3
ENSMUSG00000089791	-0.275387	-0.179582	1.05719	0.569326	0.405184	-0.000741705	-0.218679	-0.285768	-0.025817	0.0223797	3
ENSMUSG00000096193	-0.107791	-0.107791	-0.107791	0.509639	-0.107791	0.0735863	-0.107791	-0.107791	0.0829219	-0.107791	4
ENSMUSG00000100009	0.0148126	-0.0521081	1.92453	0.0823342	0.724128	-0.157283	-0.216049	-0.210451	-0.0501659	-0.256702	1
ENSMUSG00000099453	-0.162159	-0.162159	0.516886	-0.0148559	-0.0178169	0.14605	-0.110721	-0.162159	-0.029807	-0.104107	4
ENSMUSG00000067028	0.186816	0.428856	1.18889	1.25296	-0.207885	-0.0656355	-0.198253	-0.197374	-0.0672354	-0.207885	1
ENSMUSG00000082431	3.25362	2.1084	1.66384	-0.395637	-0.888478	-0.749224	-0.743115	0.148844	0.266607	0.728253	5
ENSMUSG00000104104	-0.154103	-0.154103	1.21077	0.666126	0.0261993	-0.110103	-0.154103	0.00394797	-0.0880337	-0.12361	1
ENSMUSG00000100662	-0.569266	-0.603986	-0.16525	-0.524529	-0.567548	0.831592	0.567018	-0.432214	-0.371803	-0.344047	4
ENSMUSG00000099835	-0.532795	-0.59705	0.069405	-0.442664	-0.702984	-0.676336	-0.68154	0.259073	0.854542	1.25332	4
ENSMUSG00000100794	-0.407288	-0.593107	-0.135785	-0.542585	-0.61929	-0.577813	-0.612987	0.23243	0.877795	0.989447	4
ENSMUSG00000099427	0.372172	-0.0531037	0.488539	-0.328991	-0.338243	0.239494	0.17114	-0.222888	-0.0433913	-0.338243	4
ENSMUSG00000100977	-0.170797	-0.170797	-0.170797	0.044404	-0.170797	0.316828	-0.0541217	-0.170797	-0.0381298	0.109995	4
ENSMUSG00000100222	-1.53969	-1.49885	-1.68688	-1.69613	-1.24593	0.110641	0.416648	0.916277	0.296629	0.00920776	6
ENSMUSG00000100065	-0.92361	-0.92361	-0.7412	-0.75233	-0.845666	0.228043	0.176544	0.0554317	0.205004	0.322056	6
ENSMUSG00000100349	-0.241664	-0.291954	0.108859	0.463407	-0.0670192	-0.110935	0.0820778	0.0272333	-0.220739	0.410445	4
ENSMUSG00000099375	-0.114432	-0.114432	0.508532	-0.114432	-0.114432	-0.114432	-0.114432	-0.114432	0.265099	-0.114432	4
ENSMUSG00000099770	0.496543	0.844136	0.437611	2.35931	-0.137816	-0.253416	0.0027636	-0.253416	-0.226061	-0.168529	3
ENSMUSG00000101890	-0.0921197	-0.0921197	0.74889	0.08798	-0.0921197	-0.0921197	0.0602196	-0.0921197	-0.0921197	-0.0921197	4
ENSMUSG00000099989	-0.836777	-0.87035	-0.884625	-0.48179	0.0791809	-0.239429	0.156968	0.382875	0.237181	0.0722032	6
ENSMUSG00000099469	-0.0882268	-0.0882268	0.752459	0.634607	-0.0882268	-0.0882268	-0.0882268	-0.0882268	-0.0882268	-0.0882268	3
ENSMUSG00000102325	-0.384566	-0.373053	-0.190177	-0.229567	0.168375	-0.121559	0.0102321	-0.02375	0.338789	-0.232004	4
ENSMUSG00000099464	-0.297821	-0.297821	0.407827	0.0893784	0.195396	0.338961	-0.0538655	0.0542727	-0.223924	-0.297821	4
ENSMUSG00000100935	-0.183402	-0.183402	0.899791	-0.183402	-0.183402	0.293055	-0.0604081	-0.140501	-0.183402	-0.0383061	4
ENSMUSG00000099801	-0.0769106	-0.252612	0.220606	-0.254046	0.0516415	0.327073	-0.213281	0.0664861	-0.00499563	-0.176007	4
ENSMUSG00000050840	2.59167	4.0055	0.336531	0.396273	-0.229575	-0.231876	-0.229538	-0.228746	-0.230199	-0.230849	5
ENSMUSG00000103991	-0.111467	-0.111467	-0.111467	1.67655	-0.111467	-0.111467	-0.111467	-0.111467	0.0369296	-0.111467	3
ENSMUSG00000099702	0.0872291	0.255702	-0.129617	-0.161393	-0.242167	0.103695	0.123198	-0.0613815	-0.13743	0.0705808	4
ENSMUSG00000047496	-0.126519	0.732946	0.233149	1.59288	-0.133892	-0.143215	-0.145744	-0.142578	-0.137398	0.0770628	3
ENSMUSG00000097482	-0.175404	-0.175404	-0.175404	1.37243	-0.0612776	-0.0386964	0.0248907	-0.105692	-0.140001	0.11729	3
ENSMUSG00000101214	-0.0902117	-0.0902117	-0.0902117	-0.0838807	-0.0902117	-0.0902117	-0.0902117	-0.0902117	0.232191	-0.0476823	4
ENSMUSG00000067017	-0.970522	-0.103681	-0.765527	-1.20449	-1.19662	-0.447955	-0.27256	0.480578	0.754771	0.820458	6
ENSMUSG00000056536	0.0143051	0.0956153	-0.00277619	0.00854384	-0.383611	-0.0840891	-0.207026	0.227375	0.273307	-0.152855	4
ENSMUSG00000100672	-0.134277	-0.134277	-0.134277	0.0229251	0.626544	0.0583147	0.0684081	-0.133281	-0.134277	-0.0685856	4
ENSMUSG00000101219	-1.95359	-1.96937	-1.71358	-1.3037	-0.914018	0.00508532	0.611111	0.680499	0.0527135	0.552309	6
ENSMUSG00000101656	-0.652879	-0.639855	0.162512	-0.0917157	-0.536823	-0.250513	-0.124555	-0.070978	0.186858	0.998876	4
ENSMUSG00000026319	0.189122	0.167564	0.57863	-0.320387	-0.366041	-0.1351	-0.0602928	-0.0708828	0.0988601	0.225723	4
ENSMUSG00000104044	-0.232576	-0.229818	0.302421	-0.219423	0.0599837	-0.105905	-0.00978242	0.100734	0.0671529	-0.0558696	4
ENSMUSG00000101330	-0.583661	-0.846295	-0.0544815	-0.247064	-0.633938	0.927138	1.00349	-0.699392	-0.654009	-0.475924	4
ENSMUSG00000026321	-0.163589	-0.124793	-0.193932	0.322882	-0.178156	-0.148959	-0.072137	-0.0643776	-0.00884395	0.669327	4
ENSMUSG00000102690	3.70608	1.09591	0.0423417	0.0862571	-0.201542	-0.15897	0.00867942	-0.173507	-0.141866	-0.163728	5
ENSMUSG00000099843	0.510943	-0.0596563	0.331372	-0.224466	-0.234944	-0.180916	-0.0588217	0.0613476	0.0579342	0.238997	4
ENSMUSG00000038866	2.28841	2.12035	0.841031	0.566472	0.419933	-0.420937	-0.322927	-0.337942	0.113686	-0.317513	5
ENSMUSG00000102501	-0.0935241	0.147443	-0.0748935	-0.0621728	-0.0935241	-0.0548591	-0.0872136	-0.0719765	0.146943	-0.0912952	4
ENSMUSG00000097612	3.31541	1.16741	-0.147514	-0.347939	-0.347881	-0.324605	-0.341769	-0.0643504	0.321406	0.168478	5
ENSMUSG00000044340	0.154302	-0.106731	-0.15806	-0.134548	0.060823	-0.156758	-0.0787859	0.160835	-0.0182134	0.283478	4
ENSMUSG00000103291	-0.115043	-0.115043	0.218645	0.0266914	-0.115043	0.00576437	-0.115043	0.260267	-0.0935443	-0.115043	4
ENSMUSG00000099604	-0.91173	-0.934523	-0.785601	-0.306343	0.160557	0.348931	0.426834	0.0859454	-0.314934	-0.0649737	6
ENSMUSG00000057329	1.9938	1.41629	0.797097	1.23147	-0.231542	-0.050515	-0.216659	-0.22869	-0.221621	-0.223616	2
ENSMUSG00000054006	-0.0673181	0.0376648	-0.0631407	0.942663	-0.0673181	-0.0622666	-0.0673181	-0.0673181	-0.0673181	-0.0673181	3
ENSMUSG00000098344	-0.114103	-0.241147	1.58764	1.12498	0.0674581	-0.132454	-0.130755	-0.206265	-0.077596	-0.223705	1
ENSMUSG00000103348	-0.0661136	-0.0661136	-0.0661136	0.0167122	-0.0661136	0.162662	-0.0661136	-0.0661136	-0.0661136	-0.0661136	4
ENSMUSG00000009905	0.0427516	-0.086061	-0.591702	-0.506251	-0.446902	-0.282383	-0.157539	0.0146181	0.352206	0.836454	4
ENSMUSG00000009907	0.201299	0.35873	-0.744245	-0.759052	0.142367	0.160606	0.112572	-0.026419	-0.0495897	0.0701895	4
ENSMUSG00000067006	-0.0771141	0.127989	0.948349	-0.113617	-0.116038	-0.116038	-0.116038	-0.0509652	-0.11463	0.305463	4
ENSMUSG00000083613	1.82093	2.39763	0.60108	0.535542	-0.327939	-0.297556	-0.238244	-0.235196	-0.0579154	0.0678692	5
ENSMUSG00000059956	4.21335	2.53929	-0.0539142	-0.153756	-0.160456	-0.159534	-0.160456	-0.160456	-0.158266	-0.160456	5
ENSMUSG00000048775	0.037931	0.546161	0.881084	-0.164211	-0.0969328	0.00997488	-0.00646023	-0.222351	0.0100334	-0.222351	4
ENSMUSG00000084228	1.44387	2.00018	1.80242	0.455618	-0.170331	-0.22233	-0.22233	-0.22233	-0.22233	-0.22233	2
ENSMUSG00000044594	2.18529	2.63439	2.19879	0.229873	-0.266081	-0.267325	-0.266948	-0.267325	-0.267186	-0.267325	5
ENSMUSG00000058017	1.19587	2.27302	2.46971	0.164171	-0.247698	-0.247698	-0.247698	-0.247698	-0.247698	-0.247698	5
ENSMUSG00000083884	-0.505704	-0.505704	1.86518	-0.344533	-0.423499	0.00831184	-0.221323	-0.0323945	-0.0213449	0.249736	1
ENSMUSG00000073602	1.42581	2.4025	2.31834	0.232018	-0.25324	-0.25324	-0.25324	-0.241592	-0.25324	-0.25324	5
ENSMUSG00000080729	0.0998924	1.92742	2.39582	0.0247188	-0.204639	-0.204639	-0.204639	-0.204639	-0.204639	-0.204639	1
ENSMUSG00000081114	-0.486709	-0.486709	2.01287	-0.14795	-0.41077	-0.0711629	-0.0552732	-0.111188	-0.0400872	0.0298411	1
ENSMUSG00000073601	2.03301	1.41011	2.74577	0.125461	-0.162874	-0.252375	-0.252375	-0.252375	-0.24482	-0.252375	5
ENSMUSG00000084189	2.37341	1.89057	1.27455	0.451108	-0.202849	-0.202849	-0.202849	-0.202849	-0.202849	-0.202849	5
ENSMUSG00000026327	0.895621	2.15513	0.678766	0.724958	-0.167923	-0.159364	-0.167923	-0.167923	-0.164523	-0.167923	2
ENSMUSG00000062345	-0.0989609	-0.0989609	0.138887	1.92083	-0.0989609	-0.0989609	-0.0989609	-0.0989609	-0.0989609	-0.0989609	3
ENSMUSG00000092572	-0.0991823	0.740183	0.77464	-0.0217371	-0.0991823	-0.0386159	-0.0991823	-0.0991823	-0.0926158	-0.0991823	4
ENSMUSG00000026315	2.48893	4.68666	0.160368	-0.135722	-0.224868	-0.206238	-0.216709	-0.224749	-0.224113	-0.226612	5
ENSMUSG00000086161	0.161736	0.344298	-0.00150215	-0.063849	0.0679009	-0.089668	-0.0953735	0.19323	-0.100603	-0.0684072	4
ENSMUSG00000096241	-0.168255	-0.0517534	-0.168255	0.875899	-0.0170468	0.0387718	-0.136005	-0.168255	0.0836895	-0.10962	3
ENSMUSG00000100457	-0.108676	0.228325	0.918292	0.0344345	0.597204	-0.0486216	-0.161425	-0.173201	-0.092269	-0.145058	4
ENSMUSG00000099484	-0.0726486	-0.0726486	-0.0431666	-0.0588784	-0.0726486	0.171978	-0.0605703	-0.0673212	-0.062857	-0.0726486	4
ENSMUSG00000100041	-0.569945	1.70783	0.025389	-0.326491	-0.532927	0.592178	0.132732	-0.491294	-0.141835	-0.393032	2
ENSMUSG00000104478	-0.103619	-0.103619	0.738349	-0.103619	-0.103619	-0.103619	-0.103619	-0.103619	0.158022	-0.103619	4
ENSMUSG00000101097	-0.215272	-0.030628	1.93889	-0.132508	-0.082543	0.000439332	-0.153907	-0.215272	-0.0149587	-0.16216	1
ENSMUSG00000100831	-0.56786	-0.561243	-0.513616	-0.562448	-0.56786	-0.541091	-0.528928	0.31627	0.610947	1.40084	4
ENSMUSG00000100884	-0.106375	-0.106375	-0.106375	-0.106375	-0.106375	-0.106375	0.0339156	0.128593	-0.106375	0.314724	4
ENSMUSG00000100025	-1.7372	-1.77395	-1.52062	-1.46381	-0.909819	0.705852	1.04649	-0.384521	-0.368719	0.666556	6
ENSMUSG00000026312	-0.158847	0.142128	1.06846	1.13846	-0.193755	-0.156836	-0.0825142	-0.0224254	-0.098666	-0.207375	1
ENSMUSG00000099926	-0.405868	-0.230819	0.204715	-0.151551	-0.197398	0.957601	0.0116143	-0.372523	-0.279249	-0.414861	4
ENSMUSG00000047216	-0.0941049	-0.0941049	-0.0941049	0.0383473	0.00438099	0.0608874	-0.0941049	-0.0941049	-0.0941049	0.326483	4
ENSMUSG00000100555	-0.056783	-0.674092	0.223956	0.389491	0.763853	0.559228	0.537394	-0.507024	-0.681633	-0.40695	3
ENSMUSG00000038702	0.0428369	-0.0487876	1.58677	0.609409	0.299892	-0.143421	-0.282979	-0.282815	0.000567135	0.0387601	1
ENSMUSG00000101875	-2.37292	-2.36977	-1.84714	-1.5	-0.773779	0.465982	0.77	0.361439	-0.0661837	0.361006	6
ENSMUSG00000099732	-0.892488	-0.835847	0.925384	-0.342358	0.0794	0.501273	0.242793	-0.551594	-0.0473238	-0.477884	4
ENSMUSG00000101220	-0.504818	-0.571019	0.652925	-0.478795	-0.517504	0.909832	0.52015	-0.45753	-0.48242	-0.588771	4
ENSMUSG00000100020	-0.559921	-0.532785	-0.499017	-0.324907	-0.422166	0.909945	0.324949	-0.257171	-0.290842	-0.436543	4
ENSMUSG00000101054	0.418799	-0.0392453	-0.0360577	0.914985	0.458374	-0.0804883	-0.103496	-0.101103	-0.110503	-0.0977756	3
ENSMUSG00000088691	-0.110698	-0.110698	1.42365	0.705965	-0.110698	-0.110698	-0.110698	-0.110698	-0.0989027	-0.110698	1
ENSMUSG00000099884	-0.138227	-0.138227	2.14533	-0.0573202	-0.138227	-0.138227	-0.00303476	-0.138227	-0.138227	-0.138227	1
ENSMUSG00000102105	-0.152601	-0.152601	-0.152601	0.465751	-0.152601	0.306423	0.0919479	-0.152601	-0.152601	-0.152601	4
ENSMUSG00000097648	-0.15412	-0.155831	-0.134464	-0.14582	-0.155831	-0.0355519	-0.132034	-0.153621	0.113617	0.603499	4
ENSMUSG00000101687	-0.382116	-0.382116	-0.382116	-0.371301	-0.382116	-0.2051	-0.306824	0.39497	0.241848	0.681337	4
ENSMUSG00000100515	2.44561	-0.0725169	0.0262698	-0.0363274	-0.0725169	-0.0670812	-0.0700616	-0.0725169	-0.0725169	-0.0483322	2
ENSMUSG00000070695	1.44739	3.0005	2.21872	0.48048	-0.0625972	-0.291954	-0.294695	-0.296757	-0.293394	-0.296928	5
ENSMUSG00000102033	-0.259654	-0.259654	-0.119929	0.289375	-0.259654	-0.00868957	0.060968	-0.15494	0.266604	-0.259654	4
ENSMUSG00000094429	1.88057	4.00892	2.00698	0.239163	-0.299811	-0.300596	-0.301533	-0.302843	-0.301945	-0.302877	5
ENSMUSG00000101154	0.153023	0.360783	1.09114	0.121035	0.0892142	0.0142903	-0.0315133	-0.199278	-0.0902031	-0.272842	4
ENSMUSG00000107979	1.47762	4.43527	-0.0147132	-0.163754	-0.178492	-0.179682	-0.181315	-0.181315	-0.181315	-0.18056	5
ENSMUSG00000101373	2.49519	3.965	1.22724	-0.0329299	-0.256325	-0.261733	-0.261947	-0.252694	-0.246765	-0.259417	5
ENSMUSG00000099615	2.70764	4.1859	1.18513	0.369075	-0.284517	-0.284004	-0.285407	-0.285062	-0.282707	-0.28353	5
ENSMUSG00000100265	3.74315	3.85267	0.989514	-0.131808	-0.255743	-0.257897	-0.257897	-0.257897	-0.256025	-0.257897	5
ENSMUSG00000100527	1.44382	2.71992	2.11511	0.111255	-0.257653	-0.257653	-0.257653	-0.252627	-0.220392	-0.247162	5
ENSMUSG00000099571	-0.6668	-0.660469	2.09652	0.762225	-0.309302	0.382386	-0.0624422	-0.414462	-0.142777	-0.522638	1
ENSMUSG00000101303	2.08622	4.30435	1.33416	-0.0986968	-0.266537	-0.265605	-0.268583	-0.265636	-0.254544	-0.268035	5
ENSMUSG00000100305	0.731782	1.12679	0.736301	0.943554	-0.151359	-0.160722	-0.159476	-0.161323	-0.157839	-0.161323	2
ENSMUSG00000099534	0.325481	0.779897	1.9241	0.787585	0.161826	-0.0140745	0.0559524	-0.361433	-0.361585	-0.479056	1
ENSMUSG00000100886	1.88277	2.40744	2.76245	-0.0922335	-0.254856	-0.292786	-0.281796	-0.275432	-0.23788	-0.27104	5
ENSMUSG00000101415	3.00506	3.84082	1.25893	-0.227945	-0.256859	-0.256859	-0.256859	-0.253027	-0.246852	-0.256154	5
ENSMUSG00000100617	1.47177	4.68878	0.72893	-0.153984	-0.217287	-0.234056	-0.234568	-0.229621	-0.229372	-0.232165	5
ENSMUSG00000100703	3.30385	3.93615	1.38771	-0.00270263	-0.287906	-0.199861	-0.29013	-0.307389	-0.307389	-0.302341	5
ENSMUSG00000100177	2.797	3.48407	0.329716	0.343476	-0.212109	-0.212109	-0.212109	-0.212109	-0.212109	-0.212109	5
ENSMUSG00000101363	0.145111	0.593295	2.19262	0.0103115	0.127452	-0.111734	-0.00675994	-0.207565	-0.294048	-0.249738	1
ENSMUSG00000101590	0.47288	3.14315	0.376453	-0.0871583	-0.166054	-0.140357	-0.166054	-0.105002	-0.166054	-0.154161	2
ENSMUSG00000102030	1.82363	3.98767	1.32948	-0.145238	-0.263977	-0.263536	-0.261717	-0.230631	-0.209667	-0.265265	5
ENSMUSG00000099870	-0.654943	-0.743727	-0.372654	-0.74087	-0.510497	0.318474	0.431754	-0.435851	0.200844	-0.159553	4
ENSMUSG00000026374	-0.777802	-1.90007	-2.36219	-1.4795	0.439229	-0.0979776	0.282236	0.63943	0.426675	0.0478597	6
ENSMUSG00000026377	-1.38739	-1.02242	-0.305931	-0.0231949	0.650127	0.208352	0.511968	-0.0850565	-0.085573	-0.78368	4
ENSMUSG00000099936	-0.329648	-0.340312	0.691927	0.577928	-0.257661	0.0922363	-0.0266066	0.0157283	-0.0986562	-0.186171	3
ENSMUSG00000064302	1.15845	1.24676	0.0958964	-0.193837	-0.378911	-0.655413	-0.473088	0.234085	0.589765	0.19836	2
ENSMUSG00000107722	-0.134373	-0.123977	-0.234988	-0.0294272	0.553739	0.126341	-0.174002	0.249548	-0.148934	-0.101126	4
ENSMUSG00000100770	-0.117096	-0.117096	-0.117096	-0.0853969	-0.117096	0.233274	-0.0631381	0.0119974	-0.0840172	-0.117096	4
ENSMUSG00000026380	-1.42376	-1.3237	-1.71563	-1.4828	-1.71426	-0.217137	0.422883	0.553865	0.825807	0.0629415	6
ENSMUSG00000089601	-0.0814811	6.14e-05	-0.0814811	-0.0814811	-0.0814811	-0.0710503	-0.0814811	0.215033	-0.00325788	-0.0814811	4
ENSMUSG00000101624	-0.159653	-0.161293	-0.06725	-0.105772	-0.152741	-0.10729	-0.115341	-0.128349	0.410467	-0.12011	4
ENSMUSG00000100040	-0.09943	-0.09943	0.742189	0.0462245	-0.09943	-0.00941336	-0.09943	-0.09943	0.000434234	-0.09943	4
ENSMUSG00000048402	0.360026	0.663064	-0.103704	1.03131	0.697185	-0.134116	-0.138621	-0.139984	-0.136624	-0.137027	3
ENSMUSG00000097408	-0.0685003	1.19006	-0.0202397	-0.0655602	-0.0685003	-0.0685003	-0.0603393	-0.0685003	-0.0606684	-0.0685003	2
ENSMUSG00000096939	-0.175591	-0.311577	-0.147648	-0.289451	-0.468763	-0.505798	-0.534157	0.306855	0.639153	0.794949	4
ENSMUSG00000100767	-1.28998	-1.30696	-0.923309	-0.973172	-0.666501	0.634289	0.906319	-0.15867	-0.374349	-0.0929695	6
ENSMUSG00000099860	-0.088836	-0.088836	-0.088836	-0.088836	-0.088836	-0.088836	-0.088836	-0.088836	0.101519	0.331532	4
ENSMUSG00000101179	-0.121383	-0.0328299	0.669057	1.16646	0.884117	-0.163592	-0.168444	-0.167419	-0.168181	-0.167028	3
ENSMUSG00000037035	-0.372662	-0.372511	-0.370849	-0.330326	-0.111823	-0.0852986	-0.0691924	0.639276	0.0108899	-0.0545863	4
ENSMUSG00000004451	-0.84309	-0.839977	-0.794929	-0.726507	-0.814098	-0.225719	-0.232183	0.814172	0.472431	0.296411	6
ENSMUSG00000101437	-0.168651	-0.168651	-0.112564	-0.131718	-0.168651	-0.040717	0.0171497	-0.146535	0.186831	-0.0632514	4
ENSMUSG00000098447	-0.179647	-0.179647	-0.152813	-0.138424	0.887868	0.0571301	-0.0495547	-0.179647	0.0627766	-0.179647	4
ENSMUSG00000098923	-0.71935	-0.694089	-0.777696	-0.0967468	1.16808	0.255071	0.24838	-0.410741	-0.172098	0.0758785	4
ENSMUSG00000101731	-0.142489	-0.142489	0.52409	0.842376	0.582479	-0.0715008	-0.141938	-0.122079	-0.11733	-0.142489	3
ENSMUSG00000026383	1.6707	1.9268	0.235718	-0.485452	-0.814904	0.0932285	0.207411	-0.234969	-0.17062	-0.254307	2
ENSMUSG00000102687	-0.388237	-0.356147	-0.295257	-0.309556	-0.389594	-0.157155	0.267734	-0.160232	0.26189	0.0662899	4
ENSMUSG00000026384	-0.334571	-0.413621	-0.218036	0.0166071	-0.0762183	0.00308952	-0.0765018	0.317437	0.0823086	-0.137558	4
ENSMUSG00000091876	-0.34481	-0.301377	-0.123631	2.67459	-0.0464959	-0.235091	-0.272958	-0.122543	0.196014	-0.155057	3
ENSMUSG00000103146	-0.164557	0.278903	-0.10759	-0.0088796	-0.166144	0.0694629	-0.126273	-0.133425	-0.110158	0.626201	4
ENSMUSG00000090277	-0.384242	-0.384242	1.16052	-0.27156	-0.258602	0.284391	-0.106568	-0.0998002	-0.15388	0.0576966	4
ENSMUSG00000100042	-0.241353	-0.278746	2.74931	0.0237262	-0.251315	-0.120957	-0.154732	-0.181791	-0.104339	-0.0727335	1
ENSMUSG00000101224	-0.193102	1.21515	-0.193102	-0.161289	-0.193102	0.506668	-0.0634861	-0.193102	-0.193102	-0.193102	2
ENSMUSG00000036975	-0.489045	-0.48567	-0.32662	-0.411826	-0.165579	-0.239017	-0.213606	0.0189565	0.226656	1.03071	4
ENSMUSG00000036962	0.281914	0.991058	1.0121	-0.0702947	-0.115869	-0.115869	-0.115869	-0.115869	-0.114232	-0.115869	2
ENSMUSG00000092245	1.05549	1.51866	-0.0895161	-0.0895161	-0.0895161	-0.0895161	-0.0895161	-0.0895161	-0.0895161	-0.0895161	2
ENSMUSG00000026387	-0.126327	-0.0542872	-0.126327	-0.125647	-0.11934	0.18161	0.0124517	-0.126327	0.0710565	-0.120931	4
ENSMUSG00000050777	-0.53494	-0.521871	-0.406518	0.307016	1.67489	0.32105	-0.281925	-0.274334	-0.478399	0.805287	3
ENSMUSG00000026385	-0.107407	-0.670004	0.0256869	-0.758055	-1.06692	-0.726327	-0.467661	1.03188	0.41548	1.09316	4
ENSMUSG00000026388	0.707695	0.440768	-0.660948	-0.563175	-0.522442	-0.421135	-0.363091	0.41326	0.400821	0.662938	4
ENSMUSG00000026389	-0.828918	-0.828918	-0.827763	-0.771774	-0.60863	0.60085	0.213114	0.3649	-0.071797	-0.398989	6
ENSMUSG00000036907	-0.0922985	-0.0922985	-0.0922985	-0.0519616	-0.0922985	-0.0922985	-0.0922985	-0.0922985	0.0981222	0.258791	4
ENSMUSG00000026390	-0.133966	-0.133966	-0.133966	1.45464	-0.133966	0.0640405	-0.133966	-0.133966	0.0414118	-0.133966	3
ENSMUSG00000058665	0.381508	0.332299	0.00267805	-0.109938	-0.165376	-0.177173	-0.116785	0.286538	-0.000588667	0.119765	4
ENSMUSG00000099957	-0.0941231	1.56242	-0.0941231	0.0164582	-0.0941231	-0.0941231	-0.0941231	-0.0941231	-0.00586851	-0.0941231	2
ENSMUSG00000100761	-0.145401	-0.145401	-0.145401	-0.145401	-0.145401	-0.106577	0.0658998	0.0215984	-0.0367978	0.277324	4
ENSMUSG00000102360	1.73889	2.42852	2.01393	0.678399	-0.248311	-0.261564	-0.256586	-0.182213	-0.319214	-0.266951	5
ENSMUSG00000097881	-0.0958043	0.997898	-0.0958043	0.129434	-0.0958043	-0.0958043	-0.0958043	-0.0958043	0.0946825	-0.0958043	2
ENSMUSG00000101700	-0.126302	-0.126302	-0.126302	0.604595	-0.126302	-0.126302	-0.126302	-0.126302	0.32961	-0.126302	4
ENSMUSG00000003721	0.0482813	-0.223496	0.00531178	-0.455434	-0.234252	-0.224213	-0.0896076	0.0997931	0.106922	0.610454	4
ENSMUSG00000104253	-0.0583937	-0.0475592	0.211731	-0.120993	-0.124453	-0.021092	-0.12402	0.173325	-0.105902	0.2974	4
ENSMUSG00000026339	-0.848482	-0.55078	-1.22978	-1.15613	-0.41922	0.0925026	-0.0068188	0.244981	0.642763	-0.255709	6
ENSMUSG00000085857	-0.111196	-0.111196	-0.111196	0.0206212	-0.111196	-0.105857	-0.111196	0.322599	0.0382372	-0.111196	4
ENSMUSG00000083582	-0.530585	-0.530585	-0.224637	-0.426491	-0.483454	0.397749	0.800824	-0.384067	-0.36282	-0.214937	4
ENSMUSG00000050534	-0.294967	-0.318262	-0.225153	-0.137583	-0.166531	0.210051	-0.0157241	0.127052	0.0702989	-0.265275	4
ENSMUSG00000081130	-0.600615	-0.585824	1.97882	-0.331701	-0.516277	0.205378	-0.216379	-0.160134	-0.0782708	0.219305	1
ENSMUSG00000001674	-0.197452	-0.97215	-0.073955	1.00527	1.01816	0.361735	0.53265	-0.401505	-0.694609	-0.288991	3
ENSMUSG00000102006	-0.102475	-0.102475	1.53322	-0.102475	-0.102475	-0.102475	-0.102475	-0.102475	-0.0201308	-0.102475	1
ENSMUSG00000102488	3.37587	0.117223	0.693032	-0.109418	-0.109418	-0.106984	-0.109418	-0.109418	-0.109418	-0.109418	2
ENSMUSG00000100913	-0.799487	-0.74055	0.336892	-0.632224	-0.626361	0.733615	0.346511	-0.296676	-0.270191	-0.20944	4
ENSMUSG00000080410	-0.0826945	-0.0826945	0.75753	-0.0202462	-0.0826945	-0.0826945	-0.0826945	-0.0826945	0.016982	-0.0826945	4
ENSMUSG00000099960	-0.107915	-0.107915	0.432373	-0.0874504	-0.107915	-0.107915	-0.107915	-0.107915	0.268924	-0.107915	4
ENSMUSG00000089274	-0.102289	-0.102289	-0.102289	-0.0394824	0.619303	-0.0691591	-0.102289	-0.102289	0.0519402	-0.072296	4
ENSMUSG00000103263	-0.157304	-0.157304	-0.157304	0.445538	-0.157304	0.223413	-0.157304	-0.00605737	-0.0860439	0.137371	4
ENSMUSG00000100762	-0.244495	-0.244495	0.757988	-0.239933	-0.244495	0.150021	-0.22272	-0.130679	-0.0190975	0.402113	4
ENSMUSG00000100405	-2.10765	-2.11456	-1.37032	-1.17397	-0.856263	0.0138097	0.598761	0.522038	0.0657854	0.572364	6
ENSMUSG00000101495	-0.318475	-0.446928	1.64432	-0.389486	-0.391834	-0.0864006	0.019245	-0.148027	-0.0976915	0.3145	4
ENSMUSG00000036815	1.13523	3.90845	0.71643	0.379604	-0.220932	-0.220014	-0.221833	-0.224216	-0.21346	-0.224987	5
ENSMUSG00000102681	0.282738	-0.0704796	0.768727	-0.0521213	-0.0704796	-0.0704796	-0.0704796	-0.0704796	-0.0631725	-0.0704796	4
ENSMUSG00000104410	1.02992	-0.103286	-0.103286	0.907042	-0.103286	-0.103286	0.0987795	-0.103286	-0.103286	-0.103286	3
ENSMUSG00000102521	-0.0901312	-0.250349	1.75435	-0.0368575	-0.250349	-0.212976	0.0647208	-0.230193	0.0557813	-0.158765	1
ENSMUSG00000104205	-0.134695	0.276693	-0.134695	0.472716	0.486423	-0.134695	-0.134695	-0.134695	0.167513	-0.134695	3
ENSMUSG00000102902	0.0186119	-0.188091	-0.188091	0.906963	-0.188091	0.377533	-0.107112	-0.144021	-0.0866789	-0.188091	3
ENSMUSG00000101985	-0.612593	-0.612593	-0.418796	-0.338695	-0.569386	0.464222	-0.0606151	-0.19355	0.00802321	0.520644	4
ENSMUSG00000102940	-0.124948	-0.124948	0.49739	0.951024	-0.0798719	-0.0752027	-0.0755939	-0.124948	-0.0185187	-0.124948	3
ENSMUSG00000103914	1.93706	1.85148	-0.0893671	-0.111383	-0.111383	-0.109721	-0.107767	-0.111383	-0.111383	-0.111383	2
ENSMUSG00000065340	-0.0822117	-0.0822117	-0.0822117	-0.004891	0.206962	-0.0684846	0.119433	-0.0822117	-0.0822117	-0.0822117	4
ENSMUSG00000101006	-0.456154	-0.182497	1.07298	-0.380563	-0.330519	-0.132783	-0.282569	-0.226585	0.214977	0.630116	4
ENSMUSG00000026341	-0.0859252	0.186766	0.393866	-0.00878035	-0.913463	-0.838478	-0.631513	0.426409	0.583868	1.25105	4
ENSMUSG00000026342	-0.353791	-0.431105	-0.21381	-0.059533	-0.0657132	-0.363934	-0.319675	0.0838921	0.577132	0.312563	4
ENSMUSG00000026343	2.14755	1.48295	2.19396	1.41188	-0.273445	-0.278862	-0.278862	-0.278862	-0.277071	-0.278862	5
ENSMUSG00000026344	1.14435	-0.199813	0.684618	1.02774	-0.157407	-0.16363	-0.0668437	-0.180093	-0.128625	0.081349	3
ENSMUSG00000049690	2.91491	3.80447	0.732868	0.92892	-0.286078	-0.218877	-0.289484	-0.289651	-0.289473	-0.286623	5
ENSMUSG00000104519	-0.104332	-0.104332	-0.104332	0.210608	-0.104332	0.125312	-0.104332	-0.063969	0.0378752	-0.104332	4
ENSMUSG00000103824	-0.105764	-0.105764	-0.105764	-0.105764	-0.105764	-0.105764	-0.105764	0.328103	0.0849112	-0.105764	4
ENSMUSG00000101385	-0.324553	-0.324553	0.65592	-0.260927	0.0166326	0.108098	-0.224642	-0.235918	-0.00292269	0.543831	4
ENSMUSG00000036155	0.872369	0.853831	-0.0737938	-0.0420767	-0.307121	-0.204424	-0.334069	0.0276674	0.332292	0.101324	2
ENSMUSG00000104378	-0.0788062	-0.0781379	-0.0762667	-0.076415	-0.0783894	-0.0689597	-0.0163277	-0.0778744	0.1132	-0.055527	4
ENSMUSG00000099471	-2.26115	-2.29082	-1.99277	-1.40844	-0.901911	0.100298	0.694725	0.473138	0.0617025	0.812049	6
ENSMUSG00000103390	-0.0957196	-0.0957196	-0.0957196	-0.0957196	-0.0957196	-0.0957196	-0.0957196	-0.0957196	0.319994	-0.0957196	4
ENSMUSG00000026347	1.4005	-0.103427	1.16199	-0.0391515	-0.103427	-0.103427	-0.101221	-0.103427	-0.0951798	-0.103427	2
ENSMUSG00000026348	-0.0934522	0.165145	0.760115	-0.0672261	-0.0987302	-0.0988846	-0.0744583	-0.0858202	-0.0428294	-0.0135288	4
ENSMUSG00000102014	-0.205931	-0.217954	-0.217954	0.0701021	-0.217954	-0.193304	-0.153838	-0.0189322	0.306851	0.325496	4
ENSMUSG00000026349	1.53469	2.133	0.850734	0.666647	0.142681	-0.104593	-0.153926	-0.208894	-0.123227	-0.672656	2
ENSMUSG00000051590	5.37035	0.0665213	0.50946	-0.0783448	0.076811	-0.0140525	-0.180634	-0.177198	-0.155842	-0.18686	5
ENSMUSG00000036104	3.33578	3.22406	0.737314	0.374079	-0.223997	-0.105962	-0.300646	-0.388387	-0.134911	-0.355754	5
ENSMUSG00000036086	0.419359	0.389769	-0.367033	0.148692	-0.411477	-0.329906	-0.45097	0.350566	0.420793	0.280237	4
ENSMUSG00000099760	-0.12921	-0.12921	-0.12921	-0.12921	-0.127184	-0.128701	-0.0232875	0.212245	0.0735486	0.0106414	4
ENSMUSG00000104164	-0.328702	-0.328455	-0.318925	-0.119475	-0.0745621	-0.197801	-0.174825	0.426622	0.148141	0.212335	4
ENSMUSG00000058603	-2.27645	-2.46244	-1.56566	-0.9793	-0.410692	-0.0885263	0.435703	0.545661	0.157708	0.763957	6
ENSMUSG00000102782	-0.100475	-0.100475	-0.100475	-0.0328726	-0.0617182	-0.00928456	0.118374	-0.0656052	-0.0565254	-0.0849364	4
ENSMUSG00000103999	-0.146492	-0.146617	-0.125398	0.0114295	0.699987	-0.10347	0.0471901	-0.120592	0.0385197	-0.104392	4
ENSMUSG00000056211	-0.0586298	-0.424331	0.443704	1.75238	1.35877	0.466881	0.10924	-0.374568	-0.514702	-1.00967	3
ENSMUSG00000101535	-0.0949297	-0.0949297	0.207724	-0.0665847	-0.0949297	0.134501	-0.0949297	-0.0732015	-0.041049	-0.0434404	4
ENSMUSG00000104239	-0.12488	-0.12488	0.0460069	0.299853	-0.115687	-0.116235	-0.12488	-0.12488	0.269577	-0.116513	4
ENSMUSG00000102179	-0.181075	-0.19537	-0.048222	-0.045377	0.642452	-0.0730162	-0.148728	-0.0739497	0.203757	-0.141812	4
ENSMUSG00000103497	-0.25635	-0.252928	0.118239	0.913233	0.0911481	-0.151563	-0.144095	0.10728	0.129343	-0.225318	3
ENSMUSG00000026353	2.1554	0.600104	0.543214	2.04905	0.381594	-0.272214	-0.198154	0.108597	-0.263954	-0.566308	2
ENSMUSG00000026354	-0.070338	-0.16001	-0.106348	-0.21422	0.0259027	-0.101275	-0.170039	0.0769011	0.357689	-0.166538	4
ENSMUSG00000026355	-0.928685	-0.664109	-0.205237	0.601966	0.904934	0.715389	0.0445314	-0.760711	0.0337322	-0.701067	3
ENSMUSG00000026356	-1.50591	-1.20543	-1.40606	-1.38671	-0.776415	0.191587	0.182542	0.255624	0.434409	0.333533	6
ENSMUSG00000088196	-0.105333	2.86852	-0.00586072	-0.105333	-0.105333	-0.105333	-0.105333	-0.105333	-0.105333	-0.105333	2
ENSMUSG00000100152	-0.169008	1.65314	-0.169008	-0.0697038	-0.169008	0.1905	-0.0884769	-0.169008	-0.0304438	-0.169008	2
ENSMUSG00000100941	-0.0686476	-0.0686476	-0.0686476	-0.0526929	-0.0686476	-0.0577574	-0.0686476	0.252423	-0.0686476	-0.0686476	4
ENSMUSG00000100078	-2.32359	-2.22387	-1.90905	-1.81076	-1.33672	-0.0870541	0.167	0.694663	0.663848	0.978897	6
ENSMUSG00000045382	5.18297	1.25077	0.296507	-0.132116	0.230568	-0.0586497	-0.129628	-0.24473	-0.244593	-0.244028	5
ENSMUSG00000099403	2.4435	-0.0753372	0.0519073	-0.0753372	-0.0753372	-0.0753372	-0.0395704	-0.0753372	-0.0753372	-0.0753372	2
ENSMUSG00000097283	0.248497	1.2236	0.751467	-0.0895145	-0.10112	-0.0696557	-0.106764	-0.116257	-0.10074	-0.114833	2
ENSMUSG00000042581	0.804251	1.80281	1.06217	1.18982	-0.22177	-0.221801	-0.222422	-0.220955	-0.214457	-0.0156556	2
ENSMUSG00000103742	-0.0637177	-0.0637177	0.785986	-0.0555496	-0.0637177	-0.0637177	-0.0637177	-0.0637177	-0.0637177	-0.0637177	4
ENSMUSG00000104130	-0.1113	-0.1113	-0.1113	0.0795435	0.0553511	-0.1113	-0.0977681	0.102353	0.0970673	-0.0916844	4
ENSMUSG00000089648	0.513112	1.61255	-0.723267	-0.217001	0.271873	-0.11913	-0.237829	0.0435263	0.261507	-0.254851	2
ENSMUSG00000094122	-2.14876	-2.18262	-1.77316	-1.17161	-0.722616	0.0904624	0.489515	0.570046	0.00711443	0.872998	6
ENSMUSG00000102800	-0.0800423	-0.0800423	-0.0800423	0.936361	0.155303	-0.0800423	-0.0683295	-0.0586276	-0.0800423	-0.0800423	3
ENSMUSG00000103803	-0.153419	-0.209808	0.227911	-0.155278	-0.119733	0.0377163	0.119294	-0.0903052	-0.0289178	-0.192803	4
ENSMUSG00000100623	-0.478121	-0.478121	-0.478121	-0.46407	-0.478121	0.627056	0.39231	-0.188918	-0.187697	-0.334395	4
ENSMUSG00000026401	3.12104	2.89168	1.38844	-0.196843	-0.361602	-0.324641	-0.381936	-0.295264	-0.0202682	-0.0314092	5
ENSMUSG00000087691	-0.0716476	-0.0716476	-0.0666683	-0.0701354	-0.0716476	-0.0535137	-0.0603467	-0.070414	0.126984	-0.0595436	4
ENSMUSG00000086825	-0.0960565	-0.0888643	0.796333	0.361882	0.106941	-0.139092	-0.18295	0.0189979	0.0401103	-0.191554	4
ENSMUSG00000026399	3.60854	3.10856	1.12607	0.588191	-0.202049	-0.320812	-0.459206	-0.236376	-0.139515	-0.140067	5
ENSMUSG00000085526	0.561397	0.637858	2.40034	1.52398	0.102577	-0.242369	-0.263078	-0.263078	-0.259466	-0.263078	1
ENSMUSG00000102139	-0.293268	-0.377458	1.85832	0.0540579	-0.221597	0.209836	0.18448	-0.329711	-0.310158	-0.264735	1
ENSMUSG00000103751	0.116958	-0.0473034	0.284798	0.154831	-0.0993053	-0.0910719	-0.086586	-0.0993053	-0.0993053	0.321499	4
ENSMUSG00000042554	1.0529	3.65045	0.155054	-0.0646217	-0.173087	-0.173087	-0.173087	-0.170793	-0.170452	-0.0547141	5
ENSMUSG00000064395	-0.111309	-0.111309	0.425399	-0.0388935	-0.111309	-0.111309	-0.111309	0.308426	-0.0505905	-0.111309	4
ENSMUSG00000026405	-0.0630287	-0.0676402	-0.0511939	-0.0599315	-0.0672492	-0.0456365	-0.0687985	-0.0682957	0.120825	-0.0626093	4
ENSMUSG00000101904	-0.0877118	-0.0198169	-0.00124527	-0.0385111	-0.0877118	-0.0877118	-0.0877118	-0.0877118	0.0048176	0.336835	4
ENSMUSG00000100257	-0.079912	-0.079912	0.345647	-0.077242	-0.079912	-0.079912	-0.079912	-0.079912	-0.079912	0.340084	4
ENSMUSG00000026409	0.474624	0.352022	-0.302521	-0.374107	-0.205096	-0.204315	-0.214384	0.149028	0.292562	0.194346	4
ENSMUSG00000046404	-0.200074	-0.152196	-0.199542	-0.115783	0.125982	0.00322711	-0.149151	0.286045	0.108184	-0.180719	4
ENSMUSG00000104515	-0.339204	0.298033	-0.0820195	-0.116564	-0.339204	0.187114	0.380828	0.138693	-0.339204	-0.339204	4
ENSMUSG00000042510	-0.197179	-0.192333	-0.197179	-0.192646	-0.197179	-0.194372	-0.195504	-0.0978307	-0.0401615	1.38179	4
ENSMUSG00000100106	0.188894	2.32877	0.549922	0.555483	-0.164407	-0.152104	-0.147937	-0.164407	-0.116506	-0.140995	2
ENSMUSG00000026415	0.482284	2.20299	0.0970951	0.502703	-0.129464	-0.120192	-0.129464	-0.129464	-0.115702	-0.129464	2
ENSMUSG00000086706	2.20921	2.11236	-0.114069	-0.107026	-0.114069	-0.114069	-0.114069	-0.114069	-0.114069	-0.114069	2
ENSMUSG00000026417	1.39781	0.670701	0.111877	0.164611	-0.149736	-0.13078	-0.14496	-0.149736	0.18562	-0.149736	2
ENSMUSG00000042474	0.88329	1.18048	-0.0794557	-0.0753535	-0.0794557	-0.0794557	-0.0794557	-0.0794557	-0.0694557	-0.0794557	2
ENSMUSG00000026420	-0.0763502	1.46885	-0.0763502	-0.0603351	-0.0763502	-0.0763502	-0.0700891	-0.0763502	-0.0607318	-0.0763502	2
ENSMUSG00000026416	3.16289	1.78764	-0.118136	-0.118136	-0.118136	-0.113072	-0.118136	-0.118136	-0.118136	-0.118136	5
ENSMUSG00000016524	-0.149056	1.89229	0.652531	0.86585	-0.149056	-0.148344	-0.149056	-0.149056	-0.149056	-0.149056	2
ENSMUSG00000016529	2.0325	1.49216	1.41845	-0.16823	-0.186697	-0.083011	-0.186697	-0.172904	-0.186697	-0.186697	2
ENSMUSG00000016528	-0.277274	-0.265698	1.56673	0.595925	0.0648842	-0.241383	-0.133165	-0.126549	-0.0334419	0.038355	1
ENSMUSG00000102856	-0.145361	-0.145361	-0.0317519	0.0238264	0.546121	-0.142279	0.0253598	-0.145361	0.089566	-0.0237947	4
ENSMUSG00000016526	-0.704446	-0.747468	1.73514	1.43951	1.13829	0.115235	-0.291741	-0.223019	-0.168307	-0.680656	1
ENSMUSG00000026427	-1.43581	-1.04932	-1.11789	-1.18031	-0.789611	0.341602	0.400236	0.209475	0.239995	-0.186416	6
ENSMUSG00000026430	4.30877	3.89355	1.24514	0.17101	0.0564064	-0.28711	-0.31356	-0.34632	-0.331247	-0.340966	5
ENSMUSG00000101729	-0.290408	0.788258	-0.141286	-0.195053	-0.197132	0.677297	-0.0219904	-0.276417	-0.241145	-0.219221	4
ENSMUSG00000042349	-0.0262994	0.11387	-0.0594894	-0.088147	-0.0792569	-0.0253929	-0.0983106	-0.0984386	0.0936565	0.0404706	4
ENSMUSG00000102027	-0.0809707	0.543487	0.75911	-0.0809707	-0.0809707	-0.0809707	-0.0809707	-0.0809707	-0.0809707	-0.0809707	4
ENSMUSG00000102055	3.14777	2.81222	0.442277	-0.196845	0.459236	-0.218236	-0.219415	-0.219415	-0.218072	-0.219415	5
ENSMUSG00000026425	0.70718	0.602155	0.427787	0.123343	-0.454981	-0.562083	-0.619316	0.412054	0.722581	-0.177178	2
ENSMUSG00000102733	-0.0795708	-0.0795708	-0.0795708	-0.0783639	-0.0795708	-0.0779029	0.122347	-0.0795708	-0.0185312	-0.0340609	4
ENSMUSG00000104060	-0.107769	-0.107769	-0.0979609	-0.0970272	-0.107454	-0.0778111	-0.0320166	-0.0726104	0.0981971	0.0950422	4
ENSMUSG00000101778	-0.106889	0.25767	-0.185718	-0.138722	-0.189907	0.0909185	-0.185971	-0.0665843	0.189084	0.0908863	4
ENSMUSG00000099959	-0.0942464	-0.0942464	-0.0942464	-0.0832269	-0.0942464	-0.0779567	-0.082885	0.0108871	0.124935	-0.0287754	4
ENSMUSG00000076287	-0.0805351	-0.0805351	0.759509	-0.0805351	-0.0805351	-0.0805351	-0.0805351	0.077953	-0.0805351	-0.0805351	4
ENSMUSG00000055184	0.519354	-0.284494	1.89188	2.08389	0.456327	-0.201725	-0.264431	-0.375814	-0.136662	-0.317223	1
ENSMUSG00000026432	-0.11062	-0.11062	-0.105812	-0.110285	-0.11062	-0.11062	-0.11031	-0.0348943	0.281547	-0.11062	4
ENSMUSG00000095841	-0.396234	-0.130082	-0.314743	-0.357746	0.144934	0.456702	-0.252559	0.283069	-0.156995	-0.0341527	4
ENSMUSG00000004552	-0.0928263	-0.0928263	0.756203	-0.0548792	-0.0928263	0.1385	-0.0906793	-0.0922998	-0.087906	-0.0928263	4
ENSMUSG00000052688	1.78054	2.37739	0.745911	0.0274313	-0.180964	-0.107041	-0.161504	-0.184824	-0.177859	-0.180729	5
ENSMUSG00000042268	4.35572	3.74318	0.985	-0.0427643	-0.269637	-0.276894	-0.2419	-0.277605	-0.275591	-0.277605	5
ENSMUSG00000042251	0.766612	0.227861	0.108233	-0.058368	-0.0988377	-0.0966562	-0.100489	0.206165	-0.0990366	-0.0957626	2
ENSMUSG00000013275	0.228932	-0.0118511	-0.0801464	0.0943784	-0.291876	-0.262964	-0.301273	0.509115	0.095782	0.313792	4
ENSMUSG00000026433	-0.944791	-0.903177	-0.901108	-0.32748	-0.90632	0.154516	0.588612	0.440823	0.0186305	-0.60098	6
ENSMUSG00000100026	-0.199695	-0.199695	0.471493	0.188502	-0.199695	-0.148157	-0.0371202	0.117235	0.128881	-0.199695	4
ENSMUSG00000026434	-1.59768	-1.62566	-1.29755	-0.687469	-0.7904	-0.54531	-0.1086	0.65323	0.972422	0.357596	6
ENSMUSG00000103569	-0.199826	-0.2	0.119765	0.0110927	-0.172272	-0.112777	0.279357	-0.147184	0.0506764	-0.173939	4
ENSMUSG00000026435	3.95774	3.16923	1.75208	1.34557	0.264368	-0.205855	-0.35375	-0.491261	-0.514148	-0.361201	5
ENSMUSG00000026436	2.58661	2.90552	2.4085	1.14723	0.491282	-0.125327	-0.38665	-0.56562	-0.454099	-0.529067	5
ENSMUSG00000059149	1.81753	1.59117	1.77152	0.121477	-0.315032	-0.202535	-0.349679	-0.332973	-0.0661776	0.131749	2
ENSMUSG00000088779	-0.0913065	-0.0913065	-0.0913065	0.396421	-0.0913065	-0.0913065	-0.0913065	-0.0913065	0.0990955	0.0415565	4
ENSMUSG00000103966	-0.077399	-0.0714505	-0.0516602	-0.028136	0.00728732	-0.0607408	0.12443	-0.077399	-0.0594852	-0.077399	4
ENSMUSG00000026437	-0.623545	-0.623545	-0.621701	-0.539753	-0.303841	-0.204612	0.108421	0.443156	-0.0501065	0.656854	4
ENSMUSG00000079330	2.00246	1.9697	1.01004	0.131856	0.501481	-0.226697	-0.199026	-0.272838	-0.212326	-0.157146	5
ENSMUSG00000118219	-0.090608	-0.090608	0.0311851	0.136344	-0.0362857	0.205156	-0.090608	-0.090608	-0.090608	-0.090608	4
ENSMUSG00000089808	-1.11653	-1.10049	-0.402049	0.218866	-0.191974	-0.421292	-0.142877	0.490513	0.25992	0.575881	6
ENSMUSG00000042115	0.000405082	0.00331796	0.575425	1.0621	-0.16222	-0.16222	-0.0148737	-0.16222	0.0199441	-0.16222	3
ENSMUSG00000009772	-0.15807	0.106784	0.41605	-0.0391389	-0.15807	-0.117092	-0.153359	-0.157055	-0.154987	0.954963	4
ENSMUSG00000100658	-0.127909	0.456046	0.757766	0.628106	-0.0667703	-0.0508705	-0.111976	-0.1214	-0.112107	-0.127909	3
ENSMUSG00000042066	3.25409	2.66167	2.5446	1.41506	-0.0630814	-0.32591	-0.388565	-0.399876	-0.399326	-0.399333	5
ENSMUSG00000090079	-0.123671	1.39031	0.956371	0.177962	-0.123671	-0.0986175	-0.123671	-0.123671	-0.123671	-0.123671	2
ENSMUSG00000042046	3.98015	3.76399	0.958202	0.951682	-0.120537	-0.344156	-0.406761	-0.201642	-0.253547	-0.399396	5
ENSMUSG00000097760	0.0990492	-0.0585916	-0.00538013	-0.0692282	-0.0732484	-0.0593072	-0.0732484	-0.0732484	0.124226	-0.0732484	4
ENSMUSG00000026439	1.6689	2.18861	-0.543282	-0.0730057	0.543087	0.109766	-0.289427	-0.101469	-0.118177	-0.215971	2
ENSMUSG00000048174	1.06645	0.568698	-0.293386	-0.292136	-0.256701	-0.0790551	-0.094859	-0.0037515	0.177451	0.00685241	2
ENSMUSG00000053024	0.59444	1.49079	0.680139	0.330654	0.794109	-0.183841	-0.186892	-0.187501	-0.182555	-0.176235	2
ENSMUSG00000026442	0.0845978	1.15428	0.63153	0.0653997	-0.184719	0.155417	-0.119406	-0.156944	-0.178429	-0.164591	2
ENSMUSG00000026443	1.93654	0.718335	-0.0736853	-0.0646469	-0.140362	0.0907195	0.0275965	-0.140362	-0.136673	-0.139692	2
ENSMUSG00000102709	-0.205546	0.000918251	-0.205546	0.41071	-0.205546	0.150682	-0.10184	0.172424	-0.00799234	-0.205546	4
ENSMUSG00000054387	3.05684	3.09887	1.9007	1.24957	0.0193995	-0.505485	-0.467843	-0.388549	-0.0557332	-0.449833	5
ENSMUSG00000100228	-1.97415	-2.17127	-1.57479	-0.873916	-0.121928	0.0606057	0.716686	0.415764	-0.144636	0.401632	6
ENSMUSG00000026447	1.78751	1.29703	1.47531	1.47678	0.484528	-0.23936	-0.57271	-0.0973363	-0.101345	-0.372211	2
ENSMUSG00000101102	-0.171722	-0.171722	-0.171722	0.300882	-0.171722	0.0888779	0.00238401	-0.171722	0.137098	-0.0808697	4
ENSMUSG00000102425	-0.23001	-0.203293	0.0946349	0.029312	0.175884	0.0413136	-0.180893	-0.094711	0.0598108	0.247179	4
ENSMUSG00000046062	-1.01769	-1.3448	0.841452	1.62398	1.46952	-0.0877598	0.0528873	-0.626165	-0.0795744	-0.223213	3
ENSMUSG00000041757	0.214074	0.000837261	0.321828	-0.38275	0.0282114	0.176483	-0.123061	-0.167317	0.00350095	0.108274	4
ENSMUSG00000101693	1.38968	3.21595	0.637535	0.386742	-0.225454	-0.144683	-0.225454	-0.224344	-0.169254	-0.225454	5
ENSMUSG00000103421	-0.167737	-0.167737	-0.117538	-0.155724	0.0407769	0.057162	0.204699	-0.114469	-0.167737	0.116068	4
ENSMUSG00000115958	-0.105272	-0.105272	-0.105272	-0.105272	-0.105272	0.142589	0.113398	-0.105272	-0.105272	-0.105272	4
ENSMUSG00000070645	-0.190274	-0.190274	-0.190274	0.0783816	-0.190274	-0.190274	-0.189996	0.247602	0.163552	0.30132	4
ENSMUSG00000070644	-0.24779	-0.201611	-0.246273	-0.224769	-0.24823	-0.238437	-0.170904	0.541948	0.221219	0.0069928	4
ENSMUSG00000070643	-0.785646	-0.823584	-0.55701	0.596759	0.493165	0.0326743	0.00879519	-0.125333	-0.145032	0.567253	3
ENSMUSG00000101004	-0.154869	-0.154652	-0.0942849	-0.132549	-0.142293	-0.0831298	0.0845543	-0.0920069	-0.0469476	0.353185	4
ENSMUSG00000090553	-0.899236	-1.94727	-1.29031	-0.766348	-0.497857	0.0219616	0.293353	0.61355	-0.118896	0.795793	6
ENSMUSG00000102976	-0.676428	-0.499602	0.127593	0.0784891	0.353002	-0.340655	-0.318499	0.129729	0.2417	0.547392	4
ENSMUSG00000094410	-0.741004	-0.732454	1.00444	1.02486	0.306013	-0.44486	-0.298659	0.0644008	0.23283	0.0922822	3
ENSMUSG00000051998	-0.0688287	0.108316	-0.0662796	-0.0639813	-0.0688287	0.160746	-0.0681055	-0.0688287	-0.0688287	-0.0688287	4
ENSMUSG00000026463	2.349	2.58603	1.58485	0.772772	-0.218478	-0.330628	-0.373946	-0.0332245	-0.176553	-0.418317	5
ENSMUSG00000102509	0.266805	0.463766	-0.0589545	0.958363	-0.111697	0.0738771	-0.121636	-0.123098	-0.12222	-0.107826	3
ENSMUSG00000103166	-0.0657421	-0.0657421	-0.0657421	-0.0547376	-0.0657421	-0.0657421	0.135573	-0.0657421	-0.0588492	-0.0551132	4
ENSMUSG00000100830	-0.225323	-0.349786	1.54305	-0.0938847	0.0978357	-0.0113521	-0.022851	-0.11889	-0.253462	0.161243	1
ENSMUSG00000010311	-0.0773429	-0.0773429	-0.0773429	0.952315	-0.0773429	-0.0378874	-0.0678503	-0.0773429	-0.0523888	-0.0773429	3
ENSMUSG00000090208	-0.125501	2.39534	0.191081	-0.125501	-0.125501	-0.125501	-0.0752754	-0.125501	-0.0333044	-0.125501	2
ENSMUSG00000041577	3.86064	3.65055	1.07082	0.492951	-0.190973	-0.221349	-0.310363	-0.311107	-0.310395	-0.311107	5
ENSMUSG00000100987	-0.0953577	-0.0953577	-0.0953577	0.0768416	-0.0953577	-0.0953577	-0.0953577	-0.0953577	0.0951207	0.325282	4
ENSMUSG00000041559	0.000501006	-0.0543516	0.100112	0.052686	0.0144745	-0.122457	0.168331	-0.122457	-0.0658448	-0.069418	4
ENSMUSG00000020423	1.32199	0.803177	2.05281	1.14449	-0.120382	-0.380086	-0.462893	-0.171941	-0.0396519	0.0712184	1
ENSMUSG00000102380	-0.143643	-0.143643	0.551474	0.489237	-0.143643	-0.143643	-0.143643	-0.143643	0.153736	0.0991462	4
ENSMUSG00000073559	-2.15678	-2.15092	-1.81363	-1.41423	-0.934008	-0.008527	0.468272	0.688877	0.146112	0.858844	6
ENSMUSG00000026450	-0.321038	-0.446526	1.02091	0.70696	0.685105	-0.317406	-0.123159	0.337707	-0.161591	-0.285397	3
ENSMUSG00000064246	-0.233276	-0.233276	-0.232962	-0.23079	-0.232804	-0.232929	-0.224992	0.649432	0.191531	-0.0277093	4
ENSMUSG00000042451	-0.103626	-0.103626	0.616799	-0.0659149	-0.103626	0.126002	-0.103626	-0.0909696	-0.0668285	-0.0346869	4
ENSMUSG00000042429	-0.176531	-0.0509355	-0.203638	-0.194141	-0.198881	-0.204706	-0.202774	0.313119	0.0268064	0.564027	4
ENSMUSG00000096676	-0.0992344	-0.0992344	-0.0992344	-0.0325902	0.62214	-0.0992344	-0.0992344	0.0763652	-0.0236507	-0.0992344	4
ENSMUSG00000026459	-0.101567	-0.101567	-0.0544571	-0.0978544	-0.101567	0.0287793	0.100465	-0.0854041	-0.0339014	-0.0917429	4
ENSMUSG00000026458	-0.287852	-0.275542	-0.308047	-0.283576	-0.315053	0.158764	0.157683	-0.0719994	0.0906064	-0.137608	4
ENSMUSG00000042305	-0.119537	0.794303	0.21213	-0.207916	-0.896659	-0.2726	-0.288689	0.132263	0.553929	-0.0506564	4
ENSMUSG00000050526	0.17824	2.76004	-0.00599214	-0.107376	-0.107376	-0.107376	-0.107376	-0.107376	-0.107376	-0.107376	2
ENSMUSG00000026456	-0.912298	-0.91857	-0.923876	-0.882744	-0.75418	-0.347823	-0.23955	0.721576	0.938062	-0.229123	6
ENSMUSG00000026457	-0.982136	-1.24916	-0.556839	0.441028	0.161132	0.258711	-0.0458753	-0.0676322	-0.05755	0.424913	4
ENSMUSG00000101061	-0.198692	-0.191069	1.01542	1.03215	-0.121954	-0.0940524	-0.177269	0.111927	-0.131777	-0.199946	3
ENSMUSG00000102722	-0.0867869	-0.0867869	-0.0867869	1.65783	-0.0867869	-0.0761321	-0.0867869	-0.0867869	-0.0867869	-0.0867869	3
ENSMUSG00000026455	0.983911	0.750902	1.01808	1.12914	0.410385	0.334432	-0.00582374	-0.498946	-0.373774	-0.701927	2
ENSMUSG00000042229	1.008	1.57605	-0.322002	-0.189036	-0.356485	0.151321	-0.0498389	-0.23359	-0.178935	0.306842	2
ENSMUSG00000077202	-0.119514	-0.119514	0.448835	-0.119514	-0.119514	-0.0892029	0.129176	-0.119514	0.0251305	-0.119514	4
ENSMUSG00000096712	-1.58215	-1.72257	-1.56103	-1.19562	-0.772242	-0.00289051	0.403603	0.475373	0.224359	0.562603	6
ENSMUSG00000101955	1.05557	0.356217	-0.118005	-0.117639	-0.118005	-0.118005	-0.109417	-0.118005	0.232842	-0.118005	2
ENSMUSG00000046367	-0.166905	-0.0173158	0.765816	0.522782	-0.166905	-0.0851666	-0.166905	-0.0146747	0.100423	-0.166905	4
ENSMUSG00000042207	-1.80265	-1.74605	1.10867	1.57241	1.50688	0.434149	-0.0596979	-0.465196	-0.192363	-0.793799	3
ENSMUSG00000097435	0.717443	1.96712	-0.0734534	0.399846	-0.115065	-0.113693	-0.115065	-0.115065	-0.115065	-0.115065	2
ENSMUSG00000026452	-0.131122	0.027495	-0.267641	-0.182364	-0.28289	0.057355	0.3464	0.0359439	-0.095704	-0.278879	4
ENSMUSG00000073557	0.725005	0.307139	0.087126	-0.0123573	0.0719532	-0.0199673	-0.107811	-0.185648	0.0357891	0.141579	2
ENSMUSG00000103614	-0.0776784	-0.109423	-0.0304173	0.21537	-0.110366	-0.0677476	-0.0954013	0.073876	0.0777557	-0.114016	4
ENSMUSG00000077846	0.410336	0.458028	-0.24169	0.0515916	0.213992	0.166862	-0.190208	-0.0057454	-0.016749	-0.204262	4
ENSMUSG00000103976	-0.208472	-0.212377	-0.182413	0.172571	-0.0414214	-0.0639761	-0.154328	0.445403	-0.109238	0.178202	4
ENSMUSG00000101168	-0.131087	-0.131087	0.394738	1.42517	-0.131087	-0.121035	-0.0720762	-0.131087	-0.043911	-0.131087	3
ENSMUSG00000026429	1.73265	1.35276	-0.404748	-0.444241	0.741266	0.0853762	0.149684	-0.158388	-0.276144	-0.418791	2
ENSMUSG00000042793	4.96264	2.42504	1.18657	0.47989	-0.0545755	-0.193712	-0.288651	-0.312706	-0.309886	-0.313029	5
ENSMUSG00000097993	1.21874	2.903	1.20873	0.945325	-0.0865472	-0.194372	-0.316435	-0.0877124	-0.315717	-0.281502	5
ENSMUSG00000097988	-0.0662851	-0.0662851	-0.0662851	-0.0662851	-0.0662851	-0.0662851	-0.0593786	-0.0507609	0.123645	-0.0662851	4
ENSMUSG00000031506	0.307084	0.033282	0.0321345	0.179852	-0.0868094	0.144535	-0.0914649	-0.0855464	-0.0904138	-0.0918553	4
ENSMUSG00000026426	0.257366	-0.261212	0.107168	-0.0614521	0.340666	-0.378989	-0.132137	0.359249	-0.0512609	0.391839	4
ENSMUSG00000085311	-0.147758	-0.14726	-0.144934	0.0619381	-0.146827	-0.144734	-0.11718	0.119556	0.313113	-0.145337	4
ENSMUSG00000026424	-0.115833	-0.115833	-0.101142	0.264298	-0.115833	0.0646481	-0.115833	-0.115833	-0.111554	0.488842	4
ENSMUSG00000079139	-0.80517	-1.25661	0.472006	0.661118	0.547858	0.851447	0.701614	-0.46987	-0.622176	-1.26105	3
ENSMUSG00000097680	-0.112172	-0.049943	-0.112172	0.0486932	0.0360859	-0.0326293	-0.112172	-0.112172	0.164672	-0.0734693	4
ENSMUSG00000003051	-1.25847	-1.20874	-0.981929	-1.17861	-1.22522	-0.690292	0.0218575	0.33018	0.960712	0.940088	6
ENSMUSG00000041926	-0.65916	-0.460276	-0.454284	-0.894041	0.107287	0.730686	0.188161	-0.327885	-0.287217	0.167542	4
ENSMUSG00000062580	-2.38064	-2.31264	-1.382	-0.298224	0.81729	0.778912	1.03447	-0.289468	-0.607102	-0.326233	6
ENSMUSG00000048096	-0.0984366	-0.141484	-0.199848	0.243046	1.74936	-0.0551705	0.0694371	-0.217952	-0.216047	-0.215883	3
ENSMUSG00000041889	0.324215	0.579354	-0.16504	-0.0358531	-0.162082	-0.161762	-0.161944	0.00733531	0.0400185	0.434228	4
ENSMUSG00000041879	-0.587444	-0.218178	0.0078115	0.398841	-0.924476	-0.614678	-0.36069	0.340054	0.861544	0.0338502	4
ENSMUSG00000100620	-0.0976066	-0.0844257	-0.0774464	-0.0981384	-0.0971676	-0.080092	0.10988	0.179005	-0.0975541	-0.0527769	4
ENSMUSG00000009418	-0.379414	-0.183746	0.499905	2.38254	-0.102553	-0.0770448	-0.179222	-0.216372	0.0225894	-0.287101	3
ENSMUSG00000102474	-0.121732	-0.121732	-0.121732	-0.10841	-0.121732	-0.12137	0.0807023	0.0168002	0.0209884	0.0851806	4
ENSMUSG00000104524	1.41576	-0.156394	-0.156394	1.48249	-0.156394	-0.034314	-0.156394	-0.156394	-0.0363651	-0.0190987	3
ENSMUSG00000054412	-0.0914295	0.112884	-0.0914295	0.0711159	0.143501	-0.0799435	-0.078774	-0.0914295	0.0989748	-0.0914295	4
ENSMUSG00000026421	-0.289999	-0.0654298	-0.65425	-0.611108	-0.740628	-0.320023	-0.101865	0.0654125	0.169298	1.41632	4
ENSMUSG00000041801	-0.37002	-0.37002	-0.37002	-0.326194	-0.215292	0.454906	-0.189735	0.182564	-0.00457237	-0.0557255	4
ENSMUSG00000026418	-0.0716362	-0.0711811	-0.0855996	0.0623069	0.00680195	0.144613	-0.0855996	-0.0855996	-0.0361013	-0.0745377	4
ENSMUSG00000041782	-0.232764	-0.324049	-0.324049	-0.312204	-0.121151	-0.111009	-0.105647	-0.0389345	0.29777	0.318257	4
ENSMUSG00000026414	-0.0707342	-0.0548639	-0.0679065	-0.00820445	-0.0707342	-0.0556332	0.13068	-0.0707342	-0.0604531	-0.0707342	4
ENSMUSG00000101482	3.01636	2.10033	0.590716	-0.551212	-0.334122	-0.562858	-0.235292	0.0117855	0.25097	-0.122443	5
ENSMUSG00000026413	1.5911	-0.0807906	0.828924	-0.0544546	-0.093293	-0.0955474	-0.0914515	-0.0955474	-0.0719894	-0.0955474	2
ENSMUSG00000102414	-0.362319	-0.365783	-0.350994	-0.184628	0.107153	0.398242	0.498538	-0.318476	-0.289002	-0.307109	4
ENSMUSG00000051985	4.61256	1.71453	0.187209	-0.126942	-0.0534087	-0.172734	-0.164735	-0.163337	-0.148961	-0.172734	5
ENSMUSG00000026411	-0.394992	-0.615135	-0.691685	-0.645621	-0.663392	-0.513688	-0.516312	0.94542	0.633663	0.551433	4
ENSMUSG00000026407	-0.06598	-0.0556209	-0.05548	-0.0576969	-0.064281	-0.0643033	-0.06598	0.230078	-0.0597443	-0.0632311	4
ENSMUSG00000102717	2.53066	0.619771	0.0534244	-0.0305885	-0.137567	-0.129562	-0.138022	-0.100076	0.0294427	-0.139772	2
ENSMUSG00000086264	-0.0818403	1.17839	-0.0818403	-0.0197665	-0.0454736	-0.0373305	-0.0818403	-0.0597644	-0.0605611	-0.0818403	2
ENSMUSG00000041642	-0.124352	0.0715815	-0.166667	-0.372205	-0.270049	-0.350954	-0.0547276	0.270593	0.378986	-0.0700244	4
ENSMUSG00000087230	4.05588	2.02718	0.488796	-0.161298	-0.168974	-0.168974	-0.167162	-0.168974	-0.164801	-0.168974	5
ENSMUSG00000041605	-0.275239	-0.273439	-0.253944	-0.239868	-0.256564	-0.268016	-0.275393	-0.0815661	0.160268	1.34032	4
ENSMUSG00000102941	-0.125992	-0.125992	0.170843	0.0360064	-0.125992	-0.125992	-0.125992	-0.125992	0.373914	-0.125992	4
ENSMUSG00000097433	-0.0766405	-0.0766405	-0.0526266	0.0107848	-0.0173472	-0.0401785	-0.0766405	-0.0766405	0.113485	-0.0766405	4
ENSMUSG00000041570	1.69467	2.0934	2.13405	1.32337	0.341141	-0.474108	-0.600797	-0.293647	-0.0576102	-0.133593	5
ENSMUSG00000097403	-0.142909	0.244467	-0.10785	-0.110629	-0.142532	-0.0259746	-0.135728	-0.122818	0.185233	0.0691341	4
ENSMUSG00000026404	1.03449	0.771668	1.11293	0.179632	-0.510787	-0.432067	-0.503419	0.27096	0.224216	0.198918	2
ENSMUSG00000041498	2.21448	2.55979	0.945768	0.330032	-0.19024	-0.283379	-0.49617	-0.0960772	0.105972	-0.266463	5
ENSMUSG00000099337	-0.178112	-0.178112	-0.178112	-0.0972976	0.602512	0.0749049	-0.162169	0.0548297	0.0736607	-0.172629	4
ENSMUSG00000101413	-0.842982	-0.836004	-0.0522298	-0.0964412	0.0537149	0.935166	1.05216	-0.689615	-0.765774	-0.784309	4
ENSMUSG00000104414	0.0588206	0.181099	0.424329	0.739441	-0.127365	-0.122609	-0.127365	-0.127365	0.0637178	-0.127365	3
ENSMUSG00000104509	-0.24889	-0.111366	0.2292	1.54994	0.271299	-0.243236	0.0578756	0.0283601	-0.251066	-0.000443062	3
ENSMUSG00000104366	-0.191005	-0.191005	0.227664	0.405162	-0.0794924	0.182299	-0.120986	-0.112113	0.0030553	-0.191005	4
ENSMUSG00000097229	-0.444689	-0.363506	0.0901413	0.635683	2.3043	0.403423	-0.0817776	-0.467282	-0.406081	-0.46932	3
ENSMUSG00000041483	-0.972004	-0.808799	1.28755	0.802475	0.350674	0.180414	0.365391	-0.345379	-0.401228	-0.467757	3
ENSMUSG00000097113	1.12246	1.39091	0.28819	0.26878	0.489972	-0.33356	-0.272927	0.239245	-0.120265	-0.0858386	2
ENSMUSG00000097448	0.00908092	-0.167873	0.0397557	0.977151	0.674745	-0.181291	-0.220731	0.42963	-0.192826	-0.167098	3
ENSMUSG00000092912	-0.105802	-0.105802	0.116139	-0.0317751	-0.105802	-0.105802	0.0200912	-0.105802	0.129443	-0.105802	4
ENSMUSG00000096432	2.14336	2.87754	1.07244	2.40589	0.0477654	-0.333295	-0.344893	-0.343891	-0.332309	-0.332345	5
ENSMUSG00000104360	-1.42189	-1.45054	-1.37133	-1.12328	-0.344971	0.262826	0.678472	0.456466	-0.273917	0.138337	6
ENSMUSG00000103953	-1.1568	-1.11312	0.329034	1.81045	0.425863	-0.0531072	-0.183286	0.0323206	0.069018	-0.322444	3
ENSMUSG00000104261	-0.180308	-0.180308	0.901023	-0.154358	-0.180308	0.141736	-0.120671	-0.100279	0.00111277	-0.105957	4
ENSMUSG00000026398	-1.0908	-0.99342	0.513959	1.51381	1.97547	0.38015	0.0933111	-0.667778	-0.268564	-0.879394	3
ENSMUSG00000102751	1.32796	-0.127634	-0.127634	0.223119	-0.127634	0.15638	-0.127634	-0.127634	-0.127634	0.29435	2
ENSMUSG00000103070	-0.288283	-0.288283	0.0317716	0.728654	0.0124539	-0.170678	-0.24549	-0.13997	0.408222	-0.0614672	3
ENSMUSG00000103728	-0.116446	-0.116446	0.726591	0.106278	-0.116446	-0.116446	-0.116446	-0.116446	0.194971	-0.116446	4
ENSMUSG00000098243	-0.0876957	0.250698	-0.0451728	0.0832257	-0.0817129	0.144225	-0.0812049	-0.0793862	-0.0817368	-0.0723726	4
ENSMUSG00000104118	-0.106163	-0.106163	0.501085	0.953338	-0.106163	0.0120469	-0.106163	-0.106163	-0.106163	-0.106163	3
ENSMUSG00000098045	-0.104037	1.15897	-0.104037	0.300742	-0.104037	0.1256	-0.104037	-0.104037	-0.104037	-0.104037	2
ENSMUSG00000103038	-0.0711664	-0.0485514	-0.0711664	0.0487361	-0.0711664	0.162728	-0.0664433	-0.0711664	-0.0659331	-0.0711664	4
ENSMUSG00000102277	-0.0781183	-0.0781183	-0.0344556	0.0179696	-0.0781183	0.15093	-0.0606302	-0.0559177	-0.0781183	-0.044538	4
ENSMUSG00000102142	-0.0764554	-0.0764554	-0.0764554	0.282173	-0.0764554	0.152555	-0.0764554	-0.0764554	-0.0764554	-0.0764554	4
ENSMUSG00000104145	-0.151053	-0.149932	-0.000162514	0.00471723	-0.17863	0.149439	-0.0989942	0.0201917	-0.0720998	0.0243091	4
ENSMUSG00000103427	-0.0781277	-0.0781277	-0.0620216	0.235082	-0.0781277	0.150921	-0.0781277	-0.0781277	-0.0644293	-0.0781277	4
ENSMUSG00000098206	-0.097723	-0.097723	-0.0666995	0.424657	-0.097723	0.133961	-0.0398597	-0.097723	-0.097723	-0.0707751	4
ENSMUSG00000104197	-0.0921057	-0.0921057	-0.0921057	0.489813	-0.0921057	0.160629	-0.0921057	-0.0736525	-0.0921057	-0.0758027	4
ENSMUSG00000026395	2.17425	2.64494	1.38183	0.393185	-0.250542	-0.0271115	-0.282016	-0.28664	-0.285631	-0.285609	5
ENSMUSG00000104291	-0.0154733	0.00971537	-0.0363657	-0.0559418	-0.0702607	0.158609	-0.0702607	-0.0702607	-0.0615054	-0.0702607	4
ENSMUSG00000099656	-0.162192	-0.162192	2.58454	-0.125423	0.00333373	-0.0792749	-0.162192	-0.162192	-0.162192	-0.128037	1
ENSMUSG00000026394	2.45285	-0.0628695	-0.0628695	-0.0628695	-0.0628695	-0.0628695	-0.0628695	-0.0628695	-0.0628695	-0.0628695	2
ENSMUSG00000101793	-0.293376	-0.293376	0.25726	-0.111985	-0.293376	0.089186	0.0261047	-0.207542	0.196155	-0.121197	4
ENSMUSG00000026393	1.26402	1.6965	0.12316	-0.212843	-0.53242	-0.375983	-0.219254	0.0919587	0.116038	0.321068	2
ENSMUSG00000102651	-0.105997	-0.0131928	-0.105997	0.272351	-0.105997	-0.016124	0.106267	-0.0775569	-0.0765089	-0.105997	4
ENSMUSG00000102448	-0.0756076	-0.0756076	-0.0740001	-0.0710343	-0.0269289	-0.0493248	-0.0746964	-0.0494096	0.12294	-0.0756076	4
ENSMUSG00000100459	4.10267	-0.0861212	-0.0861212	-0.0861212	-0.0861212	-0.0861212	-0.0861212	-0.0861212	-0.0735892	-0.0861212	5
ENSMUSG00000103152	4.10678	1.5973	0.093102	-0.24139	-0.236085	-0.121993	-0.111608	-0.141315	-0.150422	-0.036605	5
ENSMUSG00000019230	0.321389	0.741606	0.517119	0.381192	-0.141582	-0.136822	0.0709443	-0.139164	-0.125896	-0.146695	2
ENSMUSG00000079283	-0.323688	-0.323688	-0.323688	-0.288144	-0.266433	-0.0507982	-0.219909	-0.118104	0.555347	0.0913634	4
ENSMUSG00000065275	-0.105631	-0.105631	-0.105631	0.460916	-0.105631	0.117765	-0.105631	-0.105631	0.0850412	-0.105631	4
ENSMUSG00000103850	-0.786525	-0.837828	0.941546	-0.652924	-0.681092	0.0976686	-0.0419807	-0.0842812	0.0878834	0.44267	4
ENSMUSG00000102365	-0.0945313	-0.0945313	-0.0945313	-0.0107721	-0.0945313	0.207513	-0.0385971	-0.0821599	-0.0757128	-0.0945313	4
ENSMUSG00000056268	-0.243503	-0.235793	-0.378899	-0.514973	-0.498565	-0.223096	-0.230147	0.186875	0.321443	0.727921	4
ENSMUSG00000104436	-0.258254	-0.12088	-0.252095	-0.235495	-0.105084	-0.00541933	-0.220999	0.547253	0.0796877	-0.112097	4
ENSMUSG00000104900	-0.140124	-0.140124	-0.136596	-0.139455	-0.140124	-0.123106	-0.0543733	0.136408	0.0525607	0.284045	4
ENSMUSG00000085361	-0.156806	-0.157825	-0.0772658	-0.0720136	-0.108518	-0.0324765	0.117073	-0.0864957	0.0150615	-0.0688631	4
ENSMUSG00000102157	-0.125038	-0.125038	-0.125038	-0.116127	-0.125038	-0.0197699	-0.117375	0.184621	0.0863213	-0.0714983	4
ENSMUSG00000105936	-0.0856987	-0.0856987	-0.0856987	-0.0808551	-0.0856987	-0.0252783	0.129505	-0.0660145	-0.0840343	-0.0094444	4
ENSMUSG00000102451	-0.134321	-0.134321	-0.134321	-0.134321	-0.134321	0.082717	-0.0399214	-0.0284611	-0.0729219	0.32023	4
ENSMUSG00000102243	-0.156248	-0.156248	-0.149551	-0.144904	-0.151088	-0.139798	-0.0792245	-0.154074	0.387466	0.0596633	4
ENSMUSG00000063681	4.11089	4.01074	0.212607	-0.22336	-0.229195	-0.225554	-0.21316	-0.228031	-0.2266	-0.220549	5
ENSMUSG00000102661	-0.0683639	-0.0683639	0.770666	-0.0602714	0.0289247	-0.0683639	-0.0683639	-0.0683639	-0.0683639	-0.0683639	4
ENSMUSG00000033964	0.738121	1.16969	1.47994	0.723579	1.17119	-0.192099	-0.175339	-0.33806	-0.367884	-0.228774	1
ENSMUSG00000033952	3.27444	2.08304	0.758137	1.24994	0.206856	-0.318342	-0.437859	-0.256867	0.0928068	-0.605851	5
ENSMUSG00000026368	-0.0685558	-0.0777487	-0.0777487	0.328212	-0.0777487	-0.0777487	0.126298	-0.0777487	-0.0770552	-0.0770464	4
ENSMUSG00000057037	1.10509	0.633952	2.06228	0.48843	-0.0160381	-0.261202	-0.268181	-0.197783	-0.0275026	-0.242288	1
ENSMUSG00000090623	0.780659	1.23421	1.40348	0.853361	0.493731	-0.220897	-0.220897	-0.220897	-0.220897	-0.220897	2
ENSMUSG00000070594	1.7845	1.60596	2.17619	0.915577	0.528658	-0.306351	-0.307072	-0.306182	-0.302717	-0.307072	5
ENSMUSG00000033898	2.22812	1.34308	2.50363	0.618989	0.0636707	-0.277032	-0.276766	-0.276521	-0.277305	-0.277305	5
ENSMUSG00000089991	0.236347	0.180993	2.12044	1.45625	0.52626	-0.24425	-0.236639	-0.244725	-0.245054	-0.245054	1
ENSMUSG00000104496	-1.85993	-1.88989	-0.792144	-0.232419	1.12786	0.247858	0.0467741	0.176735	0.179711	-0.424143	6
ENSMUSG00000085867	0.0172065	-0.0614679	1.84011	-0.0476986	0.53919	-0.139713	-0.140734	-0.138517	-0.140734	-0.140734	1
ENSMUSG00000102905	2.39962	-0.133841	-0.0527306	-0.11533	-0.133841	-0.0732237	-0.0816481	-0.0496873	-0.0635791	0.102179	2
ENSMUSG00000026365	1.6778	1.77883	1.98926	1.07136	0.47043	-0.299968	-0.302131	-0.305402	-0.303659	-0.305409	5
ENSMUSG00000052726	-0.0352126	0.526679	-0.0770471	0.250788	-0.104138	-0.16404	-0.16598	-0.0545347	0.0595776	0.375895	4
ENSMUSG00000102698	-0.12481	-0.12481	0.363041	-0.0041195	-0.101125	-0.0307026	-0.12481	-0.12481	-0.0106776	0.297057	4
ENSMUSG00000102500	-0.473932	-0.473932	-0.0922808	0.522659	0.101151	0.468575	0.425712	-0.425702	-0.334331	-0.398235	3
ENSMUSG00000095238	-0.0821128	-0.0821128	-0.0821128	-0.0821128	-0.0821128	-0.0821128	-0.0821128	0.0953352	0.108116	-0.0821128	4
ENSMUSG00000093879	-0.116218	-0.116218	0.633143	0.20767	-0.116218	-0.116218	-0.0685982	-0.116218	0.0746541	-0.0267865	4
ENSMUSG00000102740	-1.69457	-1.64121	-1.70541	-1.11525	-0.227612	-0.331825	0.123169	0.788192	0.5906	0.210558	6
ENSMUSG00000104147	-0.183406	-0.183406	0.0253818	0.0881361	0.0446981	-0.183406	0.155072	0.132064	-0.00815511	-0.13969	4
ENSMUSG00000099671	-0.266674	0.137961	1.12801	-0.177125	-0.266674	-0.122924	-0.0675378	0.216719	-0.0739807	-0.113764	4
ENSMUSG00000101909	-0.364068	-0.364068	2.0986	-0.342077	-0.261907	0.264229	-0.092918	-0.32209	-0.138099	-0.131837	1
ENSMUSG00000102818	-0.39731	-0.401358	2.23128	0.738244	-0.144017	-0.118982	-0.22451	-0.255	0.0351374	-0.169708	1
ENSMUSG00000101795	-2.58607	-2.61673	-2.11969	-1.79546	-0.9704	0.229387	0.482626	0.584034	0.421019	0.494132	6
ENSMUSG00000026361	-0.595715	-0.601168	-0.738691	-0.698857	-0.0102576	-0.334217	0.0982746	0.47799	0.282725	0.0726829	4
ENSMUSG00000033849	-0.227658	-0.227658	-0.227658	-0.190259	-0.186417	0.0369851	-0.0764638	0.241018	0.171323	-0.212611	4
ENSMUSG00000089640	-0.34566	-0.326277	0.195806	-0.0860156	-0.142212	0.086856	-0.342599	0.122825	0.0498037	0.45779	4
ENSMUSG00000018196	-0.664463	-0.723807	1.90942	2.5783	1.31899	0.0167967	0.0992307	-0.503557	-0.630227	-0.5788	1
ENSMUSG00000018199	0.222632	-0.0179243	-0.0229024	-0.223236	-0.181637	0.171499	0.191306	0.0772418	-0.188583	-0.226651	4
ENSMUSG00000018189	-1.0664	-1.01191	-1.37282	-1.13117	-0.270661	0.30041	0.513025	0.0533654	-0.158246	0.484955	6
ENSMUSG00000100455	-0.126846	-0.22793	-0.251219	0.0366707	-0.154449	0.0886115	0.22319	-0.176656	-0.00629285	-0.0657316	4
ENSMUSG00000026360	4.04968	3.89347	1.4407	0.979678	-0.0255205	-0.324254	-0.363929	-0.378431	-0.370962	-0.378466	5
ENSMUSG00000051079	-0.0917856	-0.0917856	-0.0917856	-0.0893189	-0.0917856	-0.0917856	0.293127	-0.0917856	-0.0898517	-0.0917856	4
ENSMUSG00000100389	-0.309173	0.209343	0.132402	-0.177923	0.102466	0.643648	-0.136069	-0.211104	-0.0352644	-0.589696	4
ENSMUSG00000026358	-0.0663071	-0.0663071	-0.0663071	-0.00797687	-0.0663071	0.163788	-0.0631109	-0.0663071	-0.0649599	-0.0663071	4
ENSMUSG00000100441	-1.97722	-2.02598	-1.75475	-1.38869	-0.87835	0.0219363	0.437116	0.549873	0.144635	0.923965	6
ENSMUSG00000098509	-0.0910122	0.214123	-0.0910122	0.214746	-0.0910122	-0.0910122	-0.0910122	-0.0910122	0.139785	-0.0910122	4
ENSMUSG00000026357	-0.0726415	-0.0726415	-0.018445	0.0689239	-0.0726415	0.160167	-0.0675568	-0.0726415	-0.0726415	-0.0726415	4
ENSMUSG00000101049	-0.322362	-0.191756	-0.237684	-0.379968	-0.220708	1.01257	0.0161529	-0.261681	-0.283921	-0.368769	4
ENSMUSG00000096352	2.61087	1.89962	2.00357	1.09197	-0.277904	-0.277904	-0.277904	-0.270316	-0.277904	-0.277904	5
ENSMUSG00000099617	-0.419015	-0.279609	0.0270772	-0.320405	-0.419015	-0.139095	-0.335466	0.174208	0.311753	0.546073	4
ENSMUSG00000097130	-0.603031	-0.533812	-0.00614468	-0.44852	-0.694423	-0.662127	-0.703082	0.387556	0.859991	1.10395	4
ENSMUSG00000101661	-0.160505	-0.342376	0.530465	-0.154995	-0.154317	0.280813	0.256874	-0.24132	-0.194967	-0.295983	4
ENSMUSG00000103055	0.17973	0.380935	-0.0304048	-0.126382	-0.314164	-0.178543	-0.262789	0.00125379	0.190679	0.546136	4
ENSMUSG00000099964	0.974338	3.29003	2.22157	2.03915	0.00574462	-0.303934	-0.388524	-0.408157	-0.394787	-0.406167	5
ENSMUSG00000090323	0.726047	-0.180093	0.958643	1.50527	0.981036	0.411632	-0.0777756	-0.239101	-0.609321	-0.648083	3
ENSMUSG00000102403	-0.398734	-0.566528	-0.0588514	-0.280203	-0.0449493	-0.00231077	-0.1881	0.403429	0.10709	0.015793	4
ENSMUSG00000035131	0.866185	2.49105	0.18268	0.660113	-0.161515	-0.155199	-0.158105	-0.161515	-0.13631	-0.158551	2
ENSMUSG00000080078	0.816091	1.3117	0.262723	0.111851	-0.0463027	-0.0762322	-0.189929	-0.345222	0.377213	-0.532708	2
ENSMUSG00000087627	-0.538317	-0.538317	0.208494	-0.259269	0.0351874	0.502184	0.253465	-0.476619	-0.0696018	-0.367395	4
ENSMUSG00000085822	-0.116503	-0.195997	0.116366	0.176706	-0.0678174	0.0357298	0.0601273	-0.0464576	-0.00926751	-0.148043	4
ENSMUSG00000102134	-0.136657	-0.136657	-0.136657	0.778792	0.373735	0.00355008	-0.136657	-0.136657	0.0546006	-0.136657	3
ENSMUSG00000104331	-0.317741	-0.129408	0.467231	-0.135602	-0.164028	-0.19921	0.117886	-0.0189864	0.0944415	-0.0473769	4
ENSMUSG00000101973	-0.459115	-0.549285	-0.0264117	-0.123852	-0.375652	0.0391775	-0.171342	-0.212324	0.535803	-0.0537463	4
ENSMUSG00000099629	-0.0914595	-0.0914595	-0.0914595	0.144586	-0.0914595	0.0528144	0.11037	-0.0914595	-0.0914595	-0.0914595	4
ENSMUSG00000101208	-0.167328	-0.167328	0.228899	0.0934803	-0.167328	-0.167328	-0.101988	0.218492	-0.112456	0.485928	4
ENSMUSG00000101735	-0.688386	-0.685296	-0.549774	-0.585406	-0.385537	0.195758	0.919898	-0.176905	-0.312512	-0.247731	4
ENSMUSG00000099842	-1.59949	-1.60226	-0.952947	-1.22685	-0.501727	0.374315	0.879151	0.118118	-0.231894	-0.0920399	6
ENSMUSG00000101074	-0.157345	-0.157345	-0.157345	0.0579414	-0.157345	-0.0814419	-0.0486293	-0.0193628	0.176153	0.114035	4
ENSMUSG00000101564	-0.593742	-0.628	0.775182	-0.0293883	-0.230474	0.640481	0.267726	-0.507201	-0.208902	-0.48473	4
ENSMUSG00000082588	-0.689863	-0.651741	-0.525846	-0.396858	-0.508314	0.415963	0.245228	-0.0486799	0.186109	-0.558497	4
ENSMUSG00000100917	-0.115441	-0.115441	1.31144	-0.115441	-0.115441	-0.115441	0.0020373	-0.115441	-0.0442172	-0.115441	4
ENSMUSG00000101011	-0.0424764	-0.0812554	1.2791	0.0866093	-0.0924949	-0.0946116	-0.0883798	-0.105395	-0.09463	-0.0806272	4
ENSMUSG00000103724	-0.163738	-0.10264	1.20064	1.63779	0.0449504	-0.101473	-0.163738	-0.162239	-0.163738	-0.163738	1
ENSMUSG00000104036	-0.118345	1.15587	0.200434	0.91354	-0.114065	-0.11168	-0.109045	-0.117529	-0.117102	-0.115678	2
ENSMUSG00000056220	-0.0705752	-0.0266908	-0.128789	-0.0685969	0.0679241	0.257583	0.0678577	-0.132695	-0.129424	-0.133134	4
ENSMUSG00000099701	-0.668243	-0.758039	1.31499	-0.119595	-0.486525	0.436357	-0.00607191	-0.204262	-0.0623053	-0.320181	4
ENSMUSG00000104812	-0.124044	2.14701	-0.124044	0.957311	-0.124044	-0.124044	-0.124044	-0.124044	-0.124044	-0.124044	2
ENSMUSG00000097028	-0.162707	0.0213591	-0.162707	-0.112096	-0.162707	0.0675452	0.0638382	-0.151906	0.099282	-0.0245915	4
ENSMUSG00000032487	3.79676	1.13236	0.465398	-0.039624	-0.164999	-0.00226861	-0.168606	-0.173568	-0.175662	-0.175662	5
ENSMUSG00000101199	-0.840528	-0.755116	-0.0430573	-0.314326	-0.404668	0.0770688	0.0227531	0.117169	-0.0685925	0.577137	4
ENSMUSG00000097754	-0.0774597	-0.0774597	-0.0774597	0.0647143	-0.0774597	-0.0774597	0.174077	-0.0774597	-0.0774597	-0.0774597	4
ENSMUSG00000099875	-1.57632	-1.24847	-1.26571	-0.617094	0.512566	0.392994	0.65216	0.0618434	-0.360226	-0.101411	6
ENSMUSG00000100690	-0.0397264	0.149465	-0.211222	-0.189298	0.00943683	-0.166782	0.50025	-0.206956	-0.208807	0.153662	4
ENSMUSG00000006007	-0.0648884	-0.0648884	-0.0648884	0.958646	-0.0403956	-0.0648884	-0.0648884	-0.0648884	-0.0648884	-0.0648884	3
ENSMUSG00000102990	-0.127896	-0.127896	0.0228966	0.991657	-0.00413041	-0.0717429	-0.060486	-0.115915	-0.0404687	-0.0773482	3
ENSMUSG00000006010	-0.000651516	-0.444862	-0.878991	-0.772725	-0.683199	-0.0814234	0.0852784	0.505172	0.347492	-0.203033	4
ENSMUSG00000006005	-1.24119	-0.943481	1.01448	1.9274	1.91301	-0.134187	-0.397629	-0.382917	-0.075839	-0.12054	3
ENSMUSG00000006014	2.34368	2.46821	1.67045	0.223903	-0.0641458	-0.302013	-0.295654	-0.214501	-0.162385	-0.27234	5
ENSMUSG00000101519	-0.641081	-0.636019	2.0412	1.60641	0.328865	-0.368013	-0.0881234	-0.21588	-0.217766	0.082085	1
ENSMUSG00000066842	-0.0862148	0.644029	0.607914	-0.0117887	-0.165374	-0.107118	0.246857	-0.168505	-0.158879	-0.167311	4
ENSMUSG00000093650	-0.343406	-0.325793	2.87617	2.45006	0.646616	-0.263817	-0.304448	-0.337826	-0.329764	-0.345557	1
ENSMUSG00000096851	-0.123883	0.251815	-0.173574	-0.141949	0.10282	0.0867229	-0.0886505	-0.173574	0.141213	-0.0175893	4
ENSMUSG00000100595	-0.288129	-0.261498	-0.273762	-0.205317	-0.155607	0.35153	-0.0851739	0.153508	-0.0847889	-0.0886689	4
ENSMUSG00000097426	-0.516283	-0.498325	0.205276	-0.534507	-0.644035	-0.545991	-0.658929	0.353459	0.661037	1.16114	4
ENSMUSG00000102095	-0.143065	-0.143065	-0.143065	0.12484	0.58144	-0.0895444	-0.0768301	0.132929	0.0121291	-0.143065	4
ENSMUSG00000114212	-0.135724	2.39167	3.21462	0.099102	-0.279983	-0.280158	-0.280348	-0.280348	-0.220108	-0.278967	1
ENSMUSG00000114943	-0.157987	2.24489	3.12557	0.156683	-0.268864	-0.269006	-0.269043	-0.269043	-0.222241	-0.267587	1
[truncated: 41,002 more rows]

## Sheet: Deng et al GSE45719
# Supplementary Table 1
# Preimplantation expression Z-score and k-means clustering Deng et al GSE45719
	MII	Zygote	Two_cell	Four_cell	Eight_cell	ICM	Cluster
ENSMUSG00000051951	1.44676	0.91529	-0.841974	-0.260447	-1.12933	-0.130303	2
ENSMUSG00000102343	1.17618	1.24872	0.0521838	-0.851138	-0.877271	-0.74868	2
ENSMUSG00000025900	0.954619	1.33751	-0.216758	-1.03001	-1.09078	0.0454258	2
ENSMUSG00000025902	-0.307262	-0.395514	-0.458379	-0.408897	-0.467834	2.03789	1
ENSMUSG00000104328	-0.430061	-0.683736	1.54003	-0.702875	-0.711254	0.987892	1
ENSMUSG00000098104	-1.02468	-1.23923	0.706546	1.06944	0.815091	-0.327167	3
ENSMUSG00000103922	-1.34953	-0.830838	0.498437	0.837173	1.19126	-0.346503	3
ENSMUSG00000033845	-1.53568	-0.806711	-0.0355206	0.585252	0.754401	1.03826	3
ENSMUSG00000102275	-0.296191	-0.472326	-0.506463	2.03054	-0.487636	-0.267926	3
ENSMUSG00000025903	-0.670589	1.03905	-1.14396	-0.874072	0.687827	0.961738	1
ENSMUSG00000033813	1.07464	1.16519	-0.256759	-0.169869	-0.294695	-1.51851	2
ENSMUSG00000062588	-0.643133	-0.98471	1.10751	0.66099	0.915412	-1.05606	4
ENSMUSG00000102653	-0.95722	-0.588963	-0.99244	1.10555	0.215125	1.21794	3
ENSMUSG00000091665	-0.231768	-0.50514	2.01551	-0.535805	-0.552878	-0.189921	4
ENSMUSG00000033793	1.06112	0.693407	-1.18883	-0.637757	-0.85013	0.922187	1
ENSMUSG00000025905	1.1084	1.29861	0.0791573	-0.855239	-0.908747	-0.72218	2
ENSMUSG00000025907	-0.641733	-0.451237	0.757023	0.784942	1.0194	-1.46839	4
ENSMUSG00000090031	-0.943306	-0.864277	0.971346	0.836086	0.927612	-0.92746	4
ENSMUSG00000103355	-0.273871	0.196766	0.774043	0.269464	0.88566	-1.85206	4
ENSMUSG00000103845	-0.739974	1.8916	0.0549028	-0.0341994	-0.283743	-0.888588	2
ENSMUSG00000033740	1.28956	0.937918	0.183761	-0.285657	-1.2664	-0.859186	2
ENSMUSG00000102135	-1.42028	-1.06349	0.41588	0.932166	0.855061	0.280664	3
ENSMUSG00000102534	1.74306	0.587973	-0.162667	-0.779908	-0.787573	-0.60088	2
ENSMUSG00000051285	-0.0810746	-0.0725504	0.367283	-1.01668	-0.920839	1.72386	1
ENSMUSG00000098201	-0.627289	0.0444138	-1.04657	0.485067	1.71655	-0.572174	3
ENSMUSG00000103509	-0.309024	-0.396021	-0.457991	-0.409213	-0.46577	2.03802	1
ENSMUSG00000048538	-0.20845	-0.726439	-1.0853	-0.333699	0.747273	1.60661	1
ENSMUSG00000097797	-0.133947	-1.15674	0.128907	-0.889535	0.4206	1.63071	1
ENSMUSG00000103903	-0.491131	1.66544	0.792195	-0.789734	-0.732384	-0.444382	2
ENSMUSG00000025909	1.3883	0.986453	-0.185992	-0.995078	-1.02247	-0.171213	2
ENSMUSG00000084353	-0.728861	-0.329096	0.843434	0.839379	0.860026	-1.48488	4
ENSMUSG00000103933	-0.546639	-0.66183	-0.687662	-0.676218	1.39692	1.17543	1
ENSMUSG00000076135	-0.558939	-0.709705	0.0314604	-0.207709	1.96662	-0.521723	3
ENSMUSG00000066693	-0.969244	-1.0525	0.5349	0.425936	1.51089	-0.44998	3
ENSMUSG00000104428	1.48523	0.284844	-0.0111923	-1.2648	0.456902	-0.950975	2
ENSMUSG00000061024	-1.50343	-1.0316	0.820123	0.613803	0.650383	0.450718	3
ENSMUSG00000025911	0.838797	0.971591	0.618495	-1.4173	-0.979876	-0.0317102	2
ENSMUSG00000079671	0.769522	1.22776	0.420373	-0.400791	-0.494027	-1.52284	2
ENSMUSG00000081441	-1.85358	0.191279	0.781044	0.00714281	0.954524	-0.0804126	3
ENSMUSG00000067879	0.0288802	0.320463	-0.795869	-0.781636	1.81781	-0.589646	3
ENSMUSG00000025912	0.494568	0.85351	0.999093	-0.0224394	-0.758608	-1.56612	2
ENSMUSG00000045210	0.842816	1.34629	0.093382	-0.0880694	-0.934456	-1.25996	2
ENSMUSG00000097893	-1.30968	1.00644	-1.0619	0.518408	-0.0850452	0.931779	1
ENSMUSG00000025915	-1.30255	-1.18599	0.391023	0.803732	1.00812	0.28566	3
ENSMUSG00000046334	-0.406079	-0.539477	1.9585	-0.606872	-0.561925	0.155853	4
ENSMUSG00000046101	-1.59679	0.144021	-0.776029	0.404946	0.919243	0.904608	3
ENSMUSG00000098234	-1.40882	-1.13248	0.413445	0.755384	0.529168	0.843301	3
ENSMUSG00000093178	-1.17812	-1.25964	0.0199967	0.657092	0.733405	1.02727	3
ENSMUSG00000099032	-0.99969	0.613861	0.964633	-1.11951	1.07465	-0.533949	4
ENSMUSG00000025916	0.518049	1.75586	-0.482498	-0.793208	-0.119369	-0.878834	2
ENSMUSG00000025917	-1.54369	-0.43612	-0.511144	0.612281	0.825406	1.05327	3
ENSMUSG00000056763	-1.47774	-0.925046	0.0742739	0.692286	0.556218	1.08001	3
ENSMUSG00000067851	0.594296	0.864133	1.07955	-0.253938	-0.96628	-1.31776	2
ENSMUSG00000102556	-0.524214	-0.653716	-0.694286	1.50756	-0.676917	1.04158	3
ENSMUSG00000042501	0.956777	1.26204	0.352693	-1.00511	-1.03853	-0.527872	2
ENSMUSG00000103448	1.52523	0.0522004	-0.216219	-1.0212	-1.0428	0.702786	2
ENSMUSG00000100212	0.896414	-1.08731	-1.10953	0.210927	1.30143	-0.211929	3
ENSMUSG00000048960	1.2146	1.17115	0.11184	-0.780527	-1.02775	-0.689309	2
ENSMUSG00000057715	0.854349	1.0975	0.13966	-0.923582	-1.45317	0.285248	2
ENSMUSG00000101314	1.20212	1.36619	-0.509043	-0.715767	-0.756817	-0.586687	2
ENSMUSG00000016918	0.756022	0.655682	-0.777528	-0.750263	-1.1303	1.24639	1
ENSMUSG00000025938	0.593888	1.20008	0.571778	-0.734913	-0.104689	-1.52614	2
ENSMUSG00000069620	-1.31228	-0.673306	0.984959	-0.640514	0.599747	1.04139	3
ENSMUSG00000099498	-0.869981	0.436936	1.66715	-0.998132	-0.470629	0.234653	4
ENSMUSG00000042414	-1.40537	-0.805726	-0.140259	0.38065	0.618396	1.35231	3
ENSMUSG00000005886	1.25827	0.692412	0.640674	-0.594822	-1.29825	-0.698282	2
ENSMUSG00000103506	-0.512642	-0.639611	-0.708694	-0.698468	1.45675	1.10267	1
ENSMUSG00000103085	-0.535329	-0.648812	-0.697796	-0.668516	1.04476	1.50569	1
ENSMUSG00000102664	-0.576462	-0.693267	0.0583012	-0.710523	0.00392608	1.91802	1
ENSMUSG00000025935	0.278638	1.44421	-0.0265843	-1.5393	-0.554997	0.398041	2
ENSMUSG00000025937	-1.42636	-0.32345	-0.120607	0.393281	-0.156051	1.63319	1
ENSMUSG00000102982	1.10839	0.982418	-0.474074	-0.151607	0.129208	-1.59433	2
ENSMUSG00000067813	-1.17184	-0.803552	0.280689	1.0491	1.21536	-0.569752	3
ENSMUSG00000102166	1.17219	1.39805	-0.698091	-0.654441	-0.693675	-0.524033	2
ENSMUSG00000025932	0.944201	0.882788	0.26255	-0.74005	-1.62396	0.274466	2
ENSMUSG00000102588	0.5865	1.42248	0.599213	-0.891721	-0.909272	-0.807199	2
ENSMUSG00000025930	-0.596188	-0.488299	-0.733768	-0.689537	0.901949	1.60584	1
ENSMUSG00000081201	-0.848383	-1.46452	0.494569	0.855603	1.07101	-0.108276	3
ENSMUSG00000082193	-1.39759	-1.09921	0.227123	0.701048	0.964758	0.603873	3
ENSMUSG00000032769	1.31968	1.08608	-0.895945	-0.647866	-0.923388	0.0614358	2
ENSMUSG00000073737	-0.59335	-1.13352	0.285775	-0.223023	-0.12893	1.79305	1
ENSMUSG00000092083	1.14753	0.923309	-0.213753	-1.40991	-0.813996	0.366821	2
ENSMUSG00000025925	-1.83471	0.971992	0.0302903	-0.237654	0.363122	0.706964	1
ENSMUSG00000104379	-0.472748	-0.614853	1.90588	-0.692185	0.310463	-0.436557	4
ENSMUSG00000032719	0.745904	0.72731	-0.781914	-1.48003	-0.238771	1.0275	1
ENSMUSG00000100652	-0.87447	-0.961741	1.18473	0.618673	0.889185	-0.856373	4
ENSMUSG00000067795	-1.29107	-1.06818	0.510052	0.896291	1.05724	-0.104325	3
ENSMUSG00000043716	-1.597	-0.810214	0.111356	0.643245	0.799498	0.85311	3
ENSMUSG00000025921	-0.137658	1.34283	0.399228	0.154863	-0.0290477	-1.73022	2
ENSMUSG00000025920	0.752441	1.51705	-0.292783	-0.934154	-1.08278	0.0402257	2
ENSMUSG00000089982	-0.957807	1.10875	0.936062	-1.17446	-0.501199	0.588652	1
ENSMUSG00000025939	-0.311552	1.97614	-0.0084888	-0.723543	-0.606647	-0.325905	2
ENSMUSG00000102457	-0.0838554	0.165865	0.769527	1.06218	-1.79766	-0.116055	4
ENSMUSG00000079658	-1.63398	-0.708195	0.410298	0.836871	0.971978	0.123026	3
ENSMUSG00000097744	0.152385	0.123935	0.885101	1.10974	-0.70697	-1.56419	4
ENSMUSG00000100959	-1.10357	-1.26703	0.352496	1.02417	1.00177	-0.00782906	3
ENSMUSG00000025940	-1.38406	-0.52886	-0.696973	0.699329	1.00377	0.906794	3
ENSMUSG00000025779	-1.59167	-0.830961	0.250163	0.620827	1.0251	0.526547	3
ENSMUSG00000091020	-1.06045	-1.15031	0.853758	0.864898	0.936773	-0.444662	3
ENSMUSG00000042686	0.733724	0.67663	1.00778	-1.27129	0.0242435	-1.17109	2
ENSMUSG00000025777	0.716249	0.935722	0.579534	0.0596335	-0.576649	-1.71449	2
ENSMUSG00000099899	1.04359	1.07487	0.469545	-0.473589	-1.25142	-0.862999	2
ENSMUSG00000100398	0.0870273	0.14262	1.21144	-1.55127	-0.683829	0.794008	1
ENSMUSG00000101589	-0.827932	0.274521	0.578469	0.995395	0.583635	-1.60409	4
ENSMUSG00000067780	-0.736643	0.0447407	0.92338	-0.844577	-0.855662	1.46876	1
ENSMUSG00000025776	1.62	0.600248	-0.00726483	-0.970572	-1.00944	-0.232966	2
ENSMUSG00000099591	1.31051	1.12332	-0.837387	-0.797853	-0.825951	0.0273692	2
ENSMUSG00000067773	1.10349	0.865707	0.602296	-0.306464	-1.20668	-1.05835	2
ENSMUSG00000101685	-1.01033	-1.24527	0.00881573	0.120348	0.786529	1.33991	3
ENSMUSG00000042596	1.47452	0.900048	-0.866935	0.0722759	-0.863565	-0.716346	2
ENSMUSG00000100720	-1.52791	-0.75357	0.474057	0.893995	1.02964	-0.116204	3
ENSMUSG00000025927	1.18957	1.04771	0.346846	-0.982939	-1.0444	-0.556782	2
ENSMUSG00000100204	0.151934	1.0981	0.392425	0.390299	-0.180104	-1.85265	2
ENSMUSG00000043760	1.09734	1.22142	-0.00434679	-1.22839	-0.222628	-0.8634	2
ENSMUSG00000041872	1.27628	1.17157	-0.119965	-0.437938	-1.00146	-0.888494	2
ENSMUSG00000041859	-0.842085	-0.988793	-0.595907	0.688482	0.171577	1.56673	3
ENSMUSG00000102121	1.3282	0.971382	0.257036	-0.706694	-1.01353	-0.8364	2
ENSMUSG00000025931	1.34163	1.21953	-0.771055	-0.744506	-0.429727	-0.615872	2
ENSMUSG00000041809	1.05463	1.44682	-0.776291	-0.736085	-0.778164	-0.210911	2
ENSMUSG00000041779	1.42358	0.998007	-0.0898569	-0.74272	-1.07309	-0.515921	2
ENSMUSG00000100819	0.806319	1.64996	-0.675645	-0.630207	-0.811943	-0.338484	2
ENSMUSG00000025933	1.11556	1.12875	0.291265	-0.870133	-1.18813	-0.477313	2
ENSMUSG00000025934	-0.689471	-0.198137	-0.188333	-0.814618	-0.0545181	1.94508	1
ENSMUSG00000025936	-1.06727	-1.08092	1.59795	0.0933845	0.114364	0.342484	4
ENSMUSG00000093963	-0.731233	-0.835793	1.48146	-0.84156	0.929412	-0.00228339	4
ENSMUSG00000067750	0.120565	1.01822	0.565961	0.165156	0.0275532	-1.89746	2
ENSMUSG00000086194	-0.86071	-0.607351	1.24069	0.410871	0.948769	-1.13226	4
ENSMUSG00000094436	-0.683185	-0.250136	1.39151	0.86052	0.0204938	-1.3392	4
ENSMUSG00000041722	0.314182	0.832486	0.700923	0.193998	-0.127686	-1.9139	2
ENSMUSG00000085507	-0.33094	0.238679	1.75247	0.187583	-1.02386	-0.823936	4
ENSMUSG00000094926	-0.338188	-0.374114	1.79019	0.398311	-0.35556	-1.12064	4
ENSMUSG00000085079	0.99346	0.956144	0.421612	-0.166028	-0.621929	-1.58326	2
ENSMUSG00000085679	-0.741337	1.16655	0.286373	0.451558	0.449743	-1.61289	4
ENSMUSG00000028033	-0.773808	-0.710235	1.50129	0.939871	-0.0902862	-0.866834	4
ENSMUSG00000082935	-1.39924	-1.12882	0.515512	0.725581	0.915101	0.371859	3
ENSMUSG00000041670	1.10571	1.07399	0.437542	-0.557207	-1.02104	-1.03899	2
ENSMUSG00000102766	-0.863242	-0.940816	0.475983	0.880924	1.28826	-0.841112	4
ENSMUSG00000026158	0.199846	0.874269	1.19504	-1.44617	-0.822296	-0.000688763	2
ENSMUSG00000026156	0.917154	0.871372	-0.362051	-1.7382	0.47092	-0.159193	2
ENSMUSG00000026155	-0.137879	1.09256	0.24745	-1.75722	-0.214476	0.769566	1
ENSMUSG00000026154	0.002936	1.16735	-1.35785	-0.72383	-0.197868	1.10925	1
ENSMUSG00000026153	0.980294	0.660739	0.993632	-0.572684	-1.31497	-0.747012	2
ENSMUSG00000026141	1.06169	1.0374	0.46283	-0.727374	-1.34771	-0.48684	2
ENSMUSG00000099997	-1.44897	-0.19299	0.534346	1.10297	0.827294	-0.822644	4
ENSMUSG00000100131	-0.810489	-0.00835429	1.3528	0.653727	0.236911	-1.4246	4
ENSMUSG00000067736	-0.336539	-0.445055	1.27146	0.723512	0.345261	-1.55864	4
ENSMUSG00000101939	-1.04774	-0.261342	1.4078	0.791491	0.198846	-1.08906	4
ENSMUSG00000101111	-1.2393	-0.333769	1.51505	0.762426	-0.0146057	-0.689802	4
ENSMUSG00000100862	-0.851721	0.0263641	1.47664	0.660581	-0.0248475	-1.28702	4
ENSMUSG00000102070	-1.11417	-0.313857	1.47114	0.782989	0.107316	-0.933419	4
ENSMUSG00000101249	-0.81278	-0.001455	1.09645	0.785988	0.453041	-1.52124	4
ENSMUSG00000073725	-0.865847	-0.13602	-0.626121	1.06706	1.40826	-0.847331	3
ENSMUSG00000033569	1.26383	1.0826	0.160163	-1.07536	-0.826154	-0.60508	2
ENSMUSG00000102747	-0.466405	-0.722893	-0.782167	0.647442	1.74654	-0.422518	3
ENSMUSG00000086240	-0.693676	-1.26855	-0.545353	0.408649	0.701304	1.39763	3
ENSMUSG00000081557	0.196011	-0.530599	-0.431583	0.848365	1.33198	-1.41417	4
ENSMUSG00000099492	-1.20818	-0.901526	-0.51974	0.568256	0.959014	1.10218	3
ENSMUSG00000053185	1.27647	1.05963	0.2224	-0.875816	-0.929634	-0.753047	2
ENSMUSG00000100261	-1.24143	-1.25898	0.568863	0.775042	0.952935	0.20357	3
ENSMUSG00000048874	1.0294	0.841793	0.762824	-1.07748	-0.405807	-1.15073	2
ENSMUSG00000103783	-1.01956	-1.09643	0.486187	-0.422877	0.68256	1.37012	3
ENSMUSG00000104315	-1.18191	-1.2913	0.73572	0.681819	0.959254	0.0964194	3
ENSMUSG00000026064	-1.18721	-0.624038	0.385343	0.34833	1.62292	-0.54535	3
ENSMUSG00000117310	0.867372	0.700502	-0.926001	-1.5708	0.482257	0.446667	1
ENSMUSG00000117091	-1.51121	-0.528035	0.838212	1.04265	0.642744	-0.48436	4
ENSMUSG00000086726	-1.17603	-1.29021	0.831768	1.02492	0.414881	0.19467	3
ENSMUSG00000086727	1.11792	1.00289	0.357183	-0.259616	-0.898341	-1.32003	2
ENSMUSG00000100237	0.825807	1.65536	-0.48694	-0.698374	-0.729685	-0.566168	2
ENSMUSG00000100910	-0.484895	0.392821	1.87554	-0.69165	-0.642136	-0.449677	4
ENSMUSG00000100205	-0.793224	-0.511936	1.38409	0.833227	0.279691	-1.19185	4
ENSMUSG00000100592	-0.956713	-0.835231	1.38448	0.802531	0.414103	-0.809173	4
ENSMUSG00000094215	-0.569864	-0.315302	1.47001	0.789946	-0.0370516	-1.33773	4
ENSMUSG00000070960	0.148615	1.05112	0.127924	-0.715257	-1.5627	0.950296	1
ENSMUSG00000026058	1.09996	1.30597	-0.196206	-0.665621	-1.22529	-0.318817	2
ENSMUSG00000100481	-1.6868	-0.427635	0.496261	0.61792	-0.149296	1.14955	3
ENSMUSG00000026134	1.76993	-1.10682	-0.535643	0.0750623	-0.50701	0.304478	2
ENSMUSG00000102714	-0.697328	-0.848217	-0.201987	1.63789	0.784468	-0.674826	3
ENSMUSG00000102093	-0.758032	-0.86478	-0.197757	-0.0730985	-0.012359	1.90603	1
ENSMUSG00000103746	-0.312455	-0.855828	1.68198	0.543562	-1.02184	-0.0354145	4
ENSMUSG00000004768	1.47883	0.884882	-0.0640208	-0.35613	-1.04396	-0.899599	2
ENSMUSG00000042215	-1.19418	-1.30051	0.64786	1.06065	0.272934	0.513244	3
ENSMUSG00000042197	0.745185	1.42709	0.109221	-0.430672	-0.426437	-1.42438	2
ENSMUSG00000081402	-0.99744	-1.18658	1.17688	0.976566	0.374425	-0.343848	4
ENSMUSG00000042182	0.68102	0.829875	0.474178	0.573152	-1.38379	-1.17444	2
ENSMUSG00000026131	0.7267	0.3309	1.40834	-0.510869	-0.655918	-1.29915	2
ENSMUSG00000096992	-1.0611	0.320366	1.64444	-0.00630983	0.127732	-1.02512	4
ENSMUSG00000101206	1.0074	1.36758	0.125557	-0.863431	-0.90077	-0.73634	2
ENSMUSG00000042111	-0.439261	1.6039	0.227921	0.263272	-0.218662	-1.43717	2
ENSMUSG00000101711	-1.11153	-1.23895	0.453695	1.07905	0.921199	-0.103468	3
ENSMUSG00000026127	-1.62946	-0.682505	0.319034	0.902759	0.974072	0.116098	3
ENSMUSG00000026126	-1.41975	-0.812144	1.40569	0.525369	0.267689	0.0331444	4
ENSMUSG00000100280	-1.37391	-0.175062	0.869175	1.41914	-0.509278	-0.230074	4
ENSMUSG00000101223	-0.430255	0.0760957	0.184552	0.243834	1.49795	-1.57217	4
ENSMUSG00000026125	-0.731507	0.581962	-0.876255	-0.847277	1.60224	0.27084	1
ENSMUSG00000026124	0.786852	-0.0254489	-0.796774	-0.759563	-0.796784	1.59172	1
ENSMUSG00000037529	1.7214	-0.827666	0.291616	0.326276	-0.850059	-0.661563	2
ENSMUSG00000104098	1.40762	0.996864	0.00439989	-0.658798	-0.702648	-1.04744	2
ENSMUSG00000037509	-1.05934	-1.35561	0.342131	1.15589	0.169871	0.74707	3
ENSMUSG00000037503	0.222217	-1.58639	0.690851	1.04606	0.443316	-0.816047	4
ENSMUSG00000104358	-1.13445	-0.052541	0.827156	0.948886	-1.2825	0.693452	4
ENSMUSG00000026123	1.16934	0.713901	-0.272577	-0.659947	-1.51489	0.564171	2
ENSMUSG00000103716	0.7683	0.972633	0.977302	-0.991417	-0.995173	-0.731645	2
ENSMUSG00000103708	-0.627563	-0.767545	0.112925	-0.790515	0.251705	1.82099	1
ENSMUSG00000102434	-0.814335	-0.516742	1.56	-0.972089	-0.0840123	0.827181	4
ENSMUSG00000045216	0.716952	-0.589716	-0.364065	-1.2816	1.53715	-0.0187171	1
ENSMUSG00000102202	-0.915674	0.0052315	0.273332	1.79476	-0.266108	-0.891538	4
ENSMUSG00000037470	-0.112056	-1.78667	-0.165086	0.823841	1.0203	0.219676	3
ENSMUSG00000047180	-0.72987	0.404191	1.6548	-0.974267	0.348593	-0.703447	4
ENSMUSG00000037447	-0.211136	-0.358166	1.37442	0.9935	-0.490912	-1.3077	4
ENSMUSG00000102762	-1.26049	-0.858887	1.09477	1.20637	-0.0514847	-0.130286	4
ENSMUSG00000010453	-0.964395	-1.04469	0.41671	1.3411	0.823781	-0.572496	3
ENSMUSG00000037432	0.819637	1.21663	0.205866	-1.38557	0.0811237	-0.937685	2
ENSMUSG00000001143	0.44991	1.29644	0.0109099	-1.00178	-1.33371	0.57823	2
ENSMUSG00000037408	-0.262316	-0.554936	0.0343238	1.2118	1.02282	-1.4517	4
ENSMUSG00000104316	-0.990599	-1.08182	1.21984	0.697733	0.73375	-0.578904	4
ENSMUSG00000001138	-1.40195	-1.03954	0.96403	0.930989	0.338382	0.208086	3
ENSMUSG00000067653	-1.07466	-1.16294	1.07946	0.66529	0.864243	-0.371397	4
ENSMUSG00000079610	-1.22254	-1.33145	0.7912	0.676192	0.3715	0.715104	3
ENSMUSG00000026121	0.514539	0.148388	1.0639	-1.51721	-0.897728	0.688113	2
ENSMUSG00000087589	1.1334	1.20553	0.232592	-0.874861	-0.888949	-0.807711	2
ENSMUSG00000046337	0.114682	-0.371448	0.171704	-0.763781	-0.967656	1.8165	1
ENSMUSG00000089906	-1.26924	0.985786	1.16693	-0.906464	0.353247	-0.330257	4
ENSMUSG00000061518	-1.1577	-0.810456	-0.52335	0.581639	0.422523	1.48734	3
ENSMUSG00000037351	-0.639897	-1.03943	-0.875004	0.381929	0.74055	1.43185	3
ENSMUSG00000102416	0.0513728	1.92704	-0.296728	-0.322237	-0.389937	-0.969509	2
ENSMUSG00000026117	-0.456794	-0.707108	-0.492157	1.05612	1.47337	-0.873437	3
ENSMUSG00000026116	1.14587	0.276348	-0.385909	-1.36699	-0.711689	1.04237	1
ENSMUSG00000102930	-0.752732	-0.561124	-0.158885	-0.446402	-0.0534584	1.9726	1
ENSMUSG00000103159	-0.560672	0.248262	-0.0774229	-0.758722	-0.726256	1.87481	1
ENSMUSG00000080054	-0.490349	-0.623881	-0.289064	-0.156268	2.01393	-0.454366	3
ENSMUSG00000050122	0.13386	0.417445	-0.135371	-1.18105	-0.862818	1.62793	1
ENSMUSG00000026114	-0.886605	-0.998639	0.099823	0.268716	-0.237711	1.75442	1
ENSMUSG00000026113	0.893834	0.996439	0.555734	-0.0387151	-1.19128	-1.21601	2
ENSMUSG00000026112	0.894478	-0.406015	-1.48228	-0.463004	0.198141	1.25868	1
ENSMUSG00000026111	1.36114	0.953616	-0.0114074	-0.433992	-0.545983	-1.32338	2
ENSMUSG00000026110	1.21822	0.931541	0.498742	-0.688081	-0.933474	-1.02694	2
ENSMUSG00000103948	-0.744427	0.054357	0.862975	1.50421	-0.959301	-0.71781	4
ENSMUSG00000026090	-1.02668	-1.50752	0.63315	0.449369	0.817462	0.634224	3
ENSMUSG00000102650	-0.310489	-0.433555	-0.513644	-0.493768	2.03206	-0.280599	3
ENSMUSG00000060771	1.06992	1.2014	0.154663	-1.03842	-0.277241	-1.11032	2
ENSMUSG00000097268	-0.851055	-0.883706	0.259357	1.26643	1.05365	-0.844676	3
ENSMUSG00000037216	0.411266	1.78278	-0.807495	-0.242082	-0.193438	-0.951036	2
ENSMUSG00000026088	1.19808	0.913437	-0.990557	-1.13037	-0.480702	0.49011	2
ENSMUSG00000026087	-1.61477	-0.441702	-0.21108	0.276307	0.778839	1.21241	3
ENSMUSG00000087374	1.33657	1.22067	-0.404267	-0.76225	-0.772887	-0.617839	2
ENSMUSG00000058407	-1.38347	1.67946	0.219502	0.0330029	-0.0929663	-0.455527	4
ENSMUSG00000026083	0.627478	-0.610754	0.323088	0.65932	0.764363	-1.76349	4
ENSMUSG00000026082	1.23812	0.838709	0.205558	-0.213941	-0.516349	-1.55209	2
ENSMUSG00000037138	1.02973	0.612677	0.245472	-0.205394	0.170311	-1.85279	2
ENSMUSG00000085391	0.0914748	1.54384	-0.525671	0.734717	-0.708596	-1.13576	2
ENSMUSG00000048814	1.00513	0.935655	0.631709	-0.371654	-0.821814	-1.37902	2
ENSMUSG00000026080	1.19576	0.812117	0.293685	-1.15447	-1.21917	0.0720719	2
ENSMUSG00000026078	-0.407211	0.855648	-1.39102	-0.566932	0.160461	1.34905	1
ENSMUSG00000026077	1.24097	1.1725	-0.495468	-0.707345	-0.0546071	-1.15605	2
ENSMUSG00000073702	-1.45806	-0.995344	0.0981053	0.688639	0.760448	0.906212	3
ENSMUSG00000003134	1.6492	0.788881	-0.293626	-0.638924	-0.875374	-0.630154	2
ENSMUSG00000003135	1.58224	0.839549	-0.947206	-0.813244	-0.245732	-0.415606	2
ENSMUSG00000085894	-0.834761	-0.943456	0.439502	0.726454	1.42522	-0.812962	3
ENSMUSG00000077704	-1.08702	-1.16709	0.716959	1.02241	0.875614	-0.360877	3
ENSMUSG00000048234	-1.07808	-1.46012	0.744652	0.405052	0.586391	0.802104	3
ENSMUSG00000064936	-0.864063	-0.912459	1.27421	0.972803	0.373108	-0.843596	4
ENSMUSG00000050967	0.0278313	0.901072	-0.486343	-0.933355	-0.970985	1.46178	1
ENSMUSG00000057173	-0.720012	1.36131	-0.916347	0.951756	-0.910156	0.233447	1
ENSMUSG00000026074	-0.418708	0.430658	0.747837	-1.56151	-0.411629	1.21335	1
ENSMUSG00000026073	1.11197	1.31028	-0.0410387	-1.10285	-0.715343	-0.563019	2
ENSMUSG00000097899	1.74509	0.608504	-0.221349	-0.763864	-0.772653	-0.595731	2
ENSMUSG00000026072	1.18403	1.00253	0.0505142	-0.776987	-1.40857	-0.0515259	2
ENSMUSG00000103560	1.68135	0.711007	-0.78408	-0.189348	-0.781007	-0.637918	2
ENSMUSG00000070942	0.885513	1.53216	-0.423953	-0.903396	-0.918039	-0.172289	2
ENSMUSG00000026070	1.35425	1.13217	-0.239951	-0.872875	-0.933124	-0.440464	2
ENSMUSG00000026068	0.802124	1.20462	0.337128	-0.419196	-1.58037	-0.344309	2
ENSMUSG00000026065	1.15317	1.21469	0.126905	-0.933	-0.991315	-0.570455	2
ENSMUSG00000102676	1.69579	0.598335	-0.00389559	-0.810539	-0.825221	-0.654466	2
ENSMUSG00000026062	1.46181	1.0248	-0.78075	-0.750549	-0.780724	-0.174584	2
ENSMUSG00000103679	1.37035	1.10153	-0.0958557	-0.819768	-0.869225	-0.687032	2
ENSMUSG00000041945	1.48352	0.949159	-0.099724	-0.726907	-0.990408	-0.615641	2
ENSMUSG00000079588	0.88942	1.13331	0.589248	-0.509727	-1.28325	-0.819005	2
ENSMUSG00000094136	1.33935	1.2346	-0.703312	-0.691614	-0.672846	-0.506175	2
ENSMUSG00000101299	1.50426	1.04671	-0.67855	-0.663574	-0.675844	-0.532997	2
ENSMUSG00000100180	1.28608	1.28156	-0.461075	-0.741181	-0.751718	-0.613665	2
ENSMUSG00000045515	0.0922115	0.0988012	0.313815	-0.863405	1.60644	-1.24786	4
ENSMUSG00000093436	1.10204	1.44936	-0.460512	-0.720675	-0.77069	-0.59953	2
ENSMUSG00000060679	-1.01956	-0.365032	-0.88974	0.28771	0.293485	1.69313	1
ENSMUSG00000041907	1.01392	0.885799	0.156873	-0.83219	-1.53972	0.315325	2
ENSMUSG00000070939	1.48	0.805368	0.00238627	-0.236679	-0.997912	-1.05316	2
ENSMUSG00000010290	0.828339	1.23097	-0.893941	0.456525	-0.323231	-1.29867	2
ENSMUSG00000008136	0.290209	0.189042	-0.782906	-0.319541	-1.09745	1.72064	1
ENSMUSG00000094497	-1.31991	-1.19643	0.21056	0.698982	0.767563	0.839238	3
ENSMUSG00000099576	-1.14963	-0.99989	-0.368084	0.657806	1.36634	0.493461	3
ENSMUSG00000066877	-0.55119	-0.384746	-1.2711	-0.152206	0.92832	1.43092	1
ENSMUSG00000103945	-0.685409	-0.500869	-1.20163	0.0828359	1.44571	0.859362	3
ENSMUSG00000057363	1.13018	1.29429	-0.056885	-0.846702	-1.0527	-0.468187	2
ENSMUSG00000100701	-0.066112	0.782662	-0.805778	-1.35003	1.38125	0.058001	1
ENSMUSG00000041763	0.29961	0.158715	-1.89479	0.0572614	0.277026	1.10218	1
ENSMUSG00000047343	-0.572363	0.159473	-0.986727	-0.952394	1.1637	1.18831	1
ENSMUSG00000091844	-1.11873	1.06164	0.00974887	-1.22249	1.03526	0.234561	1
ENSMUSG00000026049	0.367618	1.48423	0.650138	-0.551582	-1.10361	-0.846792	2
ENSMUSG00000026047	1.1423	0.676274	-0.151601	-1.15526	-1.19108	0.679367	2
ENSMUSG00000041684	0.811982	0.805216	0.343996	-0.873139	-1.59752	0.50946	2
ENSMUSG00000026048	1.53542	0.914157	-0.909003	-0.470094	-0.840651	-0.229833	2
ENSMUSG00000056870	0.89317	1.05091	0.171941	-1.30815	-1.12181	0.313941	2
ENSMUSG00000101701	0.425644	1.6692	-0.321186	0.167448	-1.06397	-0.877136	2
ENSMUSG00000026042	-0.429009	-0.524595	-0.592683	-0.53909	0.114124	1.97125	1
ENSMUSG00000104476	-0.680199	1.07537	-0.970982	-0.930783	1.22065	0.285948	1
ENSMUSG00000100361	-0.113846	-0.393825	-0.591221	-0.436282	-0.480146	2.01532	1
ENSMUSG00000100843	0.194685	0.378482	-1.09465	-1.07188	1.57201	0.021361	1
ENSMUSG00000025995	-0.557559	-1.29909	0.0427285	1.32851	0.990002	-0.504599	3
ENSMUSG00000084817	-1.11882	-1.34857	0.239821	0.694807	1.09399	0.438773	3
ENSMUSG00000025993	-1.36667	-0.343857	1.5747	-0.52988	0.206493	0.459221	4
ENSMUSG00000099432	-0.465554	-0.601999	1.94219	0.207914	-0.640135	-0.44242	4
ENSMUSG00000041144	1.13413	1.14173	0.230549	-0.463994	-1.18857	-0.853843	2
ENSMUSG00000101262	-0.632662	-0.738649	-0.783808	0.778047	1.65968	-0.282613	3
ENSMUSG00000101337	1.12034	1.07736	0.381835	-0.504187	-0.913984	-1.16136	2
ENSMUSG00000025986	1.52332	0.930217	-0.133383	-0.761864	-0.748996	-0.809297	2
ENSMUSG00000100213	-0.525196	-0.643804	1.82277	-0.67264	0.526423	-0.507557	4
ENSMUSG00000081185	-1.67542	-0.380321	0.614697	0.79566	0.966566	-0.321185	3
ENSMUSG00000100033	-0.790595	-0.891836	-0.401039	0.744778	1.66132	-0.322625	3
ENSMUSG00000026109	0.835613	0.752622	0.845381	-0.0869408	-1.53364	-0.813031	2
ENSMUSG00000026107	-1.41683	-0.946304	0.473378	1.24584	0.560284	0.0836343	3
ENSMUSG00000099413	0.705515	1.45975	0.333712	-0.891111	-1.09833	-0.509532	2
ENSMUSG00000018417	-1.36505	-0.870603	-0.254025	0.512779	1.20884	0.768061	3
ENSMUSG00000101724	-0.95745	-1.06266	0.261348	-0.213503	1.65518	0.317088	3
ENSMUSG00000100313	-0.923179	-0.13274	-0.098193	-1.16075	0.940825	1.37404	1
ENSMUSG00000072324	-1.2932	-0.988648	-0.0740924	0.84452	1.25034	0.261077	3
ENSMUSG00000062939	1.06486	1.08989	0.312854	-0.479229	-1.42653	-0.561845	2
ENSMUSG00000026104	1.04646	0.551102	-0.0736591	-1.5029	-0.828069	0.807072	2
ENSMUSG00000026103	-1.60822	-0.889081	0.751154	0.595622	0.720684	0.429845	3
ENSMUSG00000002881	0.691573	0.827881	0.928651	-0.560103	-1.60655	-0.281448	2
ENSMUSG00000097833	-0.355246	-0.00754237	-0.562494	-0.494633	-0.575462	1.99538	1
ENSMUSG00000100007	-1.31868	-1.07926	0.565702	0.848919	1.02652	-0.0432014	3
ENSMUSG00000043015	1.52234	0.734857	-0.0882844	-0.189442	-1.25397	-0.725501	2
ENSMUSG00000041439	0.826756	0.965204	0.848047	-0.4036	-1.15002	-1.08639	2
ENSMUSG00000026102	0.385762	0.254458	1.08809	-0.575637	-1.71801	0.565336	2
ENSMUSG00000041426	-1.39944	-0.879678	-0.00181099	0.440688	0.48406	1.35618	3
ENSMUSG00000043629	0.855307	0.476595	-0.085911	-1.37444	-0.969356	1.09781	1
ENSMUSG00000060715	-0.693375	0.0940259	0.153891	-0.836603	-0.576541	1.8586	1
ENSMUSG00000026098	1.18225	1.13228	-0.893183	-0.770726	-0.923973	0.273359	2
ENSMUSG00000026097	1.10294	0.115366	-1.73175	-0.453216	0.26127	0.705393	1
ENSMUSG00000026096	0.881395	1.20508	-1.63894	-0.239693	-0.0503262	-0.157513	2
ENSMUSG00000026095	-1.7819	0.384531	0.0342622	0.225079	-0.130124	1.26815	1
ENSMUSG00000096141	1.03353	1.1084	0.410991	-1.28954	-0.823241	-0.440141	2
ENSMUSG00000026094	-1.69081	-0.703194	0.742302	0.242242	0.85257	0.556887	3
ENSMUSG00000042807	0.643209	0.918037	0.169443	0.0912623	0.100632	-1.92258	2
ENSMUSG00000025983	0.524398	0.459118	-0.569635	-1.72205	0.224776	1.0834	1
ENSMUSG00000041303	-0.38232	-1.25709	-0.816799	0.202678	1.01248	1.24105	3
ENSMUSG00000109809	0.638996	1.7665	-0.659992	-0.633875	-0.645009	-0.466621	2
ENSMUSG00000073678	1.21351	0.84289	-0.347874	-1.06595	-1.14385	0.50127	2
ENSMUSG00000052331	0.861561	0.871039	0.456149	0.0342784	-0.471658	-1.75137	2
ENSMUSG00000101674	-0.609722	-0.741641	0.302191	1.89086	-0.251586	-0.590107	4
ENSMUSG00000102642	-0.913165	-0.480038	0.700051	0.560168	-1.18311	1.31609	1
ENSMUSG00000025982	1.16982	-0.0527086	-1.75875	-0.154737	0.710027	0.08635	1
ENSMUSG00000103030	0.160124	-1.80184	0.624415	0.767656	-0.474094	0.723735	3
ENSMUSG00000025981	1.07631	1.3256	-0.137275	-0.500796	-0.521935	-1.2419	2
ENSMUSG00000101122	-1.11318	0.309016	1.8092	-0.345374	-0.163599	-0.496068	4
ENSMUSG00000025980	-0.434062	-0.238362	-0.986556	-0.369603	0.123422	1.90516	1
ENSMUSG00000073676	-0.432674	-0.187921	-0.827649	-0.332181	-0.204589	1.98501	1
ENSMUSG00000089670	-0.731198	-0.949212	1.29429	1.18998	-0.128044	-0.675812	4
ENSMUSG00000025979	1.35946	1.11309	-1.11585	-0.620029	-0.290925	-0.445755	2
ENSMUSG00000025978	0.0640733	-0.0544636	-1.03969	0.830334	1.36529	-1.16554	3
ENSMUSG00000046994	-0.863667	-1.34008	0.592541	1.30642	0.573099	-0.268313	3
ENSMUSG00000025977	1.07095	0.881172	0.421669	-1.47755	-0.0518681	-0.844371	2
ENSMUSG00000100215	-1.30325	-0.763844	0.391972	0.82501	1.29754	-0.447429	3
ENSMUSG00000038349	1.29262	1.25087	-0.535732	-0.371055	-0.804525	-0.832174	2
ENSMUSG00000102145	-0.0987768	1.85829	-0.374594	-0.985008	-0.616166	0.216252	2
ENSMUSG00000099950	1.01198	0.776296	0.878465	-1.0847	-1.0856	-0.496434	2
ENSMUSG00000100944	-1.21848	-1.30221	0.333681	0.672197	0.990879	0.523937	3
ENSMUSG00000045336	-0.320315	2.03452	-0.488263	-0.45912	-0.469842	-0.296977	2
ENSMUSG00000038331	-0.269811	-0.104258	-0.14107	-1.61779	1.11378	1.01915	1
ENSMUSG00000087022	0.375432	1.19061	0.144339	-1.84655	0.0967065	0.0394723	2
ENSMUSG00000097519	-0.298491	-0.0973447	-0.646988	-0.929522	0.0713649	1.90098	1
ENSMUSG00000038323	1.35189	0.863119	0.10283	-0.212715	-0.773448	-1.33168	2
ENSMUSG00000048495	-0.516782	-0.271334	-0.767551	-0.609774	0.259984	1.90546	1
ENSMUSG00000025971	-0.899898	-1.59972	0.431543	0.581217	0.71455	0.772308	3
ENSMUSG00000101826	-0.649492	-0.86868	-0.944271	0.114087	0.890012	1.45834	3
ENSMUSG00000038305	0.231524	1.30569	-0.303088	0.492168	-0.021295	-1.705	2
ENSMUSG00000091283	-0.724452	-0.811101	-0.299283	1.27929	1.26185	-0.706304	3
ENSMUSG00000054770	0.535593	-1.03636	1.16091	0.960189	-0.641829	-0.978504	4
ENSMUSG00000026039	1.44361	0.863246	0.114944	-1.13045	-0.494188	-0.797162	2
ENSMUSG00000063558	-0.705098	0.371556	0.374869	-0.847942	-0.857633	1.66425	1
ENSMUSG00000064294	-0.674209	1.1953	-1.5473	0.430208	-0.126198	0.722193	1
ENSMUSG00000038242	1.16638	1.33095	-0.620722	-0.907549	-0.176612	-0.792453	2
ENSMUSG00000079554	1.23627	-0.908588	-0.554902	-0.723583	-0.350008	1.30081	1
ENSMUSG00000051223	-1.38179	-1.18472	0.501395	0.591779	0.729147	0.744195	3
ENSMUSG00000026034	1.46628	0.829382	-0.667538	-1.23614	-0.432293	0.040303	2
ENSMUSG00000026035	-1.43522	-0.0128018	-0.713978	0.146888	0.572625	1.44248	1
ENSMUSG00000026036	-1.26234	-1.11762	0.00712321	0.44588	0.737648	1.18931	3
ENSMUSG00000026037	-1.24829	1.40356	0.817076	-0.0308577	-0.895026	-0.0464657	4
ENSMUSG00000085054	-0.797226	0.621688	1.14574	0.856768	-0.551363	-1.2756	4
ENSMUSG00000038174	0.979294	1.26592	0.249458	-0.412336	-0.903087	-1.17925	2
ENSMUSG00000026032	-1.41426	-0.434002	-0.378066	0.171522	0.513583	1.54123	3
ENSMUSG00000059647	-1.28903	0.226981	1.72722	-0.50267	0.0560245	-0.218528	4
ENSMUSG00000026031	1.0619	1.24992	0.152031	-1.14815	-0.430729	-0.884971	2
ENSMUSG00000026029	0.888966	1.41239	-0.0861087	-1.15268	-0.927692	-0.134872	2
ENSMUSG00000099719	0.923185	1.20172	0.480839	-1.02285	-1.08588	-0.497007	2
ENSMUSG00000026028	-0.3441	-0.361266	1.57008	0.653643	-0.165051	-1.35331	4
ENSMUSG00000026027	1.12962	1.00246	0.486372	-0.740181	-1.23124	-0.647031	2
ENSMUSG00000072295	0.306553	1.1269	0.0403413	-1.88052	0.291146	0.115587	2
ENSMUSG00000038079	1.14139	1.10845	-1.47828	-0.333583	-0.414002	-0.0239702	2
ENSMUSG00000097573	-1.04259	-0.747596	0.0336715	1.53957	0.800988	-0.58405	3
ENSMUSG00000079550	-0.846061	-0.964955	0.690582	0.855939	1.15902	-0.894527	4
ENSMUSG00000099563	-0.545464	-0.707703	-0.796596	1.23154	1.33529	-0.51707	3
ENSMUSG00000026024	-0.808962	-0.943439	0.652813	1.22815	0.80541	-0.933972	4
ENSMUSG00000026023	1.19223	1.13091	0.157056	-0.440147	-1.00693	-1.03312	2
ENSMUSG00000099922	0.934843	1.18212	0.54772	-0.861466	-1.07588	-0.727336	2
ENSMUSG00000041075	1.05114	0.131031	1.09265	-0.130508	-1.50111	-0.643198	2
ENSMUSG00000097819	0.830419	0.160261	0.888741	-1.24058	-1.25531	0.616464	2
ENSMUSG00000047361	0.879775	1.25589	-0.426879	-0.605646	-1.41506	0.311921	2
ENSMUSG00000026021	-1.55431	-0.262703	-0.492741	0.226926	1.20224	0.880592	3
ENSMUSG00000026020	-1.23741	-1.21789	0.16859	0.424511	1.07779	0.784404	3
ENSMUSG00000077345	-0.908949	-0.979937	-0.779118	0.855834	0.565438	1.24673	3
ENSMUSG00000089512	-1.07595	-1.12246	-0.350009	0.897186	0.443731	1.2075	3
ENSMUSG00000089093	-0.714999	-0.909371	0.620276	-1.02107	1.31577	0.709399	3
ENSMUSG00000067336	0.77485	1.25522	0.625166	-0.772604	-0.762247	-1.12038	2
ENSMUSG00000041040	0.896516	1.18244	0.598059	-0.927683	-1.03239	-0.716939	2
ENSMUSG00000103696	-1.763	-0.426776	1.16585	0.316257	0.347316	0.360353	3
ENSMUSG00000100901	-0.725784	0.892269	-0.154628	-0.861862	1.55397	-0.703963	4
ENSMUSG00000026018	0.630463	0.426175	0.683556	0.20433	0.0330505	-1.97757	4
ENSMUSG00000026019	-1.26213	-1.13408	-0.0699961	0.734532	1.0622	0.669475	3
ENSMUSG00000026017	-1.53173	-0.890495	0.86022	0.162248	0.460254	0.939506	3
ENSMUSG00000082609	-1.42435	-0.928159	0.286136	0.71943	1.22263	0.124314	3
ENSMUSG00000073664	0.901614	0.67276	-0.0859784	-1.76409	0.675004	-0.39931	2
ENSMUSG00000049439	-1.01847	0.0476544	1.00332	0.0583344	1.16831	-1.25915	4
ENSMUSG00000026782	-0.862523	0.090719	0.199596	-1.33356	0.398989	1.50678	1
ENSMUSG00000026014	0.989868	0.824821	-1.28514	-0.770834	-0.609063	0.85035	1
ENSMUSG00000081562	-1.50716	-1.02295	0.475053	0.525711	0.837297	0.692047	3
ENSMUSG00000103215	0.340223	1.73325	-0.860339	-0.847728	0.238325	-0.603727	2
ENSMUSG00000084151	-0.393361	-0.58894	-0.658095	-0.603269	0.352296	1.89137	1
ENSMUSG00000101188	1.02748	-0.868227	-1.44271	0.125078	0.119582	1.0388	1
ENSMUSG00000026012	-0.666489	-0.785414	-0.16572	-0.810074	0.821177	1.60652	1
ENSMUSG00000026011	1.07303	1.03644	0.496584	-0.464586	-1.16825	-0.973224	2
ENSMUSG00000081382	-1.58319	-0.777268	0.379299	0.816895	1.02958	0.134683	3
ENSMUSG00000085248	1.21402	1.11792	0.123252	-0.631559	-1.22769	-0.595942	2
ENSMUSG00000086408	1.80032	0.573077	-0.648438	-0.625737	-0.634004	-0.465222	2
ENSMUSG00000089546	1.06039	1.49299	-0.684425	-0.660854	-0.680316	-0.527786	2
ENSMUSG00000100965	0.792632	1.32332	0.52247	-0.941606	-0.951767	-0.745051	2
ENSMUSG00000052062	1.23825	1.04876	-0.183784	-0.0762828	-0.644023	-1.38292	2
ENSMUSG00000085019	1.12872	1.14653	0.332357	-0.758433	-1.01413	-0.835045	2
ENSMUSG00000084333	-1.14298	-1.24608	-0.0447653	0.790908	1.10759	0.535333	3
ENSMUSG00000025969	0.392376	0.943298	-1.0796	-1.03329	-0.454301	1.23151	1
ENSMUSG00000040865	0.977491	0.656361	0.332405	-0.0725814	-0.0235452	-1.87013	2
ENSMUSG00000081429	-1.12128	-1.24096	0.240951	1.25587	0.743366	0.122044	3
ENSMUSG00000084799	-1.14798	-1.39705	0.352655	0.78117	0.71216	0.699036	3
ENSMUSG00000101599	-1.22792	-1.33451	0.738659	0.530707	0.801498	0.491564	3
ENSMUSG00000025968	-0.984994	-1.07536	-0.414889	0.22614	0.878695	1.37041	3
ENSMUSG00000025967	-0.75206	-1.0046	-0.78736	0.335654	0.747705	1.46066	3
ENSMUSG00000064602	-1.35488	-0.895987	-0.144911	0.296269	0.893599	1.20591	3
ENSMUSG00000046856	1.04804	1.33286	0.0317123	-1.07798	-0.8563	-0.478335	2
ENSMUSG00000086730	-1.53627	-0.190472	-0.692041	1.09582	0.50541	0.81756	3
ENSMUSG00000027520	-0.300775	-1.18637	1.21146	-0.228546	-0.710971	1.2152	1
ENSMUSG00000081643	-1.48652	-1.05184	0.506429	0.731604	0.497212	0.803105	3
ENSMUSG00000025964	-0.565401	0.449891	-0.290533	-0.686512	-0.743175	1.83573	1
ENSMUSG00000115378	-0.436912	1.42661	-0.72866	-0.688697	-0.701921	1.12958	1
ENSMUSG00000069085	-0.526432	1.32956	-0.692737	-0.683413	-0.673704	1.24673	1
ENSMUSG00000025962	0.192418	0.0972293	-1.58238	-0.635629	0.658974	1.26938	1
ENSMUSG00000025959	1.25889	0.976995	0.315751	-0.917191	-1.12056	-0.513891	2
ENSMUSG00000025958	-1.74155	-0.660191	0.857691	0.528733	0.491629	0.52369	3
ENSMUSG00000025956	-1.35286	-1.13896	0.375572	1.10274	0.476358	0.537149	3
ENSMUSG00000100437	1.74531	-0.280122	0.578162	-0.376211	-0.904063	-0.763077	2
ENSMUSG00000087213	1.08294	1.01574	0.510195	-0.704084	-1.28808	-0.616707	2
ENSMUSG00000070871	1.56572	-0.0148482	0.535928	-0.338104	-1.43014	-0.318552	2
ENSMUSG00000045005	-1.02317	-1.39749	0.800548	0.547926	0.0440283	1.02816	3
ENSMUSG00000051344	-0.400484	-1.65641	0.849787	0.908864	0.65075	-0.352503	4
ENSMUSG00000097264	-0.755945	-0.896558	0.255371	1.29036	-0.918413	1.02518	3
ENSMUSG00000084416	-1.29205	-1.2576	0.34821	0.687164	0.824543	0.689733	3
ENSMUSG00000077471	-0.6798	-0.92286	1.44554	-0.957623	0.38671	0.728033	3
ENSMUSG00000025955	0.968293	0.722036	0.114701	-0.342185	-1.81329	0.350442	2
ENSMUSG00000070870	-1.05847	-0.587772	-0.784228	0.310902	0.523033	1.59654	3
ENSMUSG00000067299	-0.673302	-0.450607	-0.219829	-0.580364	-0.0644449	1.98855	1
ENSMUSG00000025952	-0.321116	-0.39733	-0.45162	-0.408888	-0.459786	2.03874	1
ENSMUSG00000073658	-0.101842	0.132159	-0.667838	-0.629693	-0.656107	1.92332	1
ENSMUSG00000100774	0.127897	1.7777	-0.0369755	-1.01247	-0.892021	0.0358695	2
ENSMUSG00000044429	-0.335143	-0.480481	-0.514053	-0.491489	-0.205813	2.02698	1
ENSMUSG00000044816	0.330227	1.2448	-0.925956	-0.80082	-0.880995	1.03274	1
ENSMUSG00000025950	0.0911461	0.175721	-1.41322	-0.853898	0.658105	1.34215	1
ENSMUSG00000025949	0.491632	1.0067	-0.830655	-1.14425	-0.665041	1.14162	1
ENSMUSG00000025946	0.161547	1.89166	-0.260914	-0.789346	-0.81883	-0.184116	2
ENSMUSG00000100340	1.02685	1.06517	0.590735	-0.718127	-1.07296	-0.891667	2
ENSMUSG00000015222	0.949278	1.26975	0.342491	-0.539901	-0.879817	-1.14181	2
ENSMUSG00000055567	0.947685	1.27608	-0.386359	-0.417719	-1.46549	0.0458073	2
ENSMUSG00000026005	0.908056	1.22906	-0.632308	-1.01375	-0.992781	0.501723	2
ENSMUSG00000026004	0.81032	1.54278	-0.384983	-1.1325	-0.115049	-0.72056	2
ENSMUSG00000102559	0.25466	-0.741834	0.308326	-0.771261	-0.798438	1.74855	1
ENSMUSG00000102374	0.389804	-0.187847	-0.0596634	-0.941819	-0.942355	1.74188	1
ENSMUSG00000102776	-0.721062	-0.911734	1.11229	-1.01831	0.460628	1.07819	3
ENSMUSG00000082057	-1.42405	-0.872557	0.563729	0.071629	0.326665	1.33458	3
ENSMUSG00000103706	-0.55958	-0.674442	1.86444	-0.326773	-0.700905	0.39726	4
ENSMUSG00000103553	-0.219381	-0.451327	-0.605091	-0.569829	2.00775	-0.16212	3
ENSMUSG00000026003	-0.552769	-0.863767	-1.1866	0.445963	0.992734	1.16444	3
ENSMUSG00000082769	-1.10613	-1.1661	-0.115831	0.798241	1.29607	0.293745	3
ENSMUSG00000077328	-0.459616	-0.611538	-0.713019	0.299067	1.90749	-0.422386	3
ENSMUSG00000094191	-1.2254	-1.04608	0.434018	0.973088	1.10124	-0.236859	3
ENSMUSG00000026000	0.659727	1.41344	-0.71846	-0.748614	-1.11133	0.505238	2
ENSMUSG00000025991	1.21059	1.17878	0.103956	-0.918589	-0.946175	-0.628562	2
ENSMUSG00000086204	0.99901	0.932885	0.502223	-0.0410932	-1.28167	-1.11135	2
ENSMUSG00000087329	0.914871	1.32172	0.336678	-0.628133	-1.06313	-0.882001	2
ENSMUSG00000062209	1.17967	1.353	-0.726297	-0.920181	-0.51678	-0.369413	2
ENSMUSG00000101387	0.463116	0.987009	-1.36638	0.640521	0.435299	-1.15956	2
ENSMUSG00000025997	0.787069	0.807092	0.415919	-0.705434	-1.70291	0.39826	2
ENSMUSG00000053153	0.874247	1.2563	0.432463	-0.431127	-0.988347	-1.14354	2
ENSMUSG00000104287	-0.674738	1.36002	-0.961145	0.304177	-0.930222	0.901905	1
ENSMUSG00000045648	1.06895	1.4341	-0.222151	-0.785302	-0.837902	-0.657698	2
ENSMUSG00000026196	1.34001	0.598947	-0.841252	0.321681	-1.42632	0.00693651	2
ENSMUSG00000089965	-0.412259	-0.539565	2.0053	-0.607048	-0.0658518	-0.380578	4
ENSMUSG00000050296	1.24283	1.20868	-0.302805	-0.273168	-1.12393	-0.75161	2
ENSMUSG00000026192	0.215597	-0.743025	-0.740538	-0.808481	1.76057	0.315874	3
ENSMUSG00000026193	0.151513	0.152535	-0.919357	-0.860833	-0.329175	1.80532	1
ENSMUSG00000073652	-0.56913	-0.399659	-0.0973907	-0.703291	-0.221327	1.9908	1
ENSMUSG00000101834	-0.0907781	-1.56625	0.687198	0.841692	0.885567	-0.757425	4
ENSMUSG00000100319	-0.919346	-1.02824	-0.444863	0.419201	1.60993	0.363318	3
ENSMUSG00000101211	-0.432572	1.97266	0.0895965	-0.612279	-0.611271	-0.406131	2
ENSMUSG00000101848	0.961293	1.34304	0.220972	-0.922129	-0.591904	-1.01127	2
ENSMUSG00000101496	-1.30315	-1.1682	0.137616	0.820454	0.980253	0.53303	3
ENSMUSG00000102123	0.476929	1.68515	0.131207	-0.896157	-0.959806	-0.437327	2
ENSMUSG00000039395	-1.26488	-0.762662	0.0656219	-0.100683	0.449573	1.61303	3
ENSMUSG00000094655	-1.29629	-0.0658094	1.03158	0.924863	-1.07792	0.483576	4
ENSMUSG00000094050	-1.85475	-0.292128	0.678311	0.919816	0.368827	0.179922	3
ENSMUSG00000093956	-1.98006	0.0566158	0.16202	0.508845	0.683358	0.56922	3
ENSMUSG00000093843	-1.22024	-0.376576	-0.658333	-0.0484135	1.52611	0.777454	3
ENSMUSG00000026189	1.22517	1.21319	-0.0400522	-0.641199	-1.06649	-0.690624	2
ENSMUSG00000026188	0.989002	1.13434	0.537323	-0.647341	-1.0248	-0.988518	2
ENSMUSG00000026187	0.202349	0.830148	-0.532008	-0.929719	-1.01632	1.44555	1
ENSMUSG00000039372	1.37138	0.907882	0.223137	-0.527839	-1.08001	-0.894551	2
ENSMUSG00000085812	-0.967616	-1.06947	0.0294244	-0.253722	1.51655	0.744837	3
ENSMUSG00000039354	1.48789	0.80658	-0.782046	-0.903347	-0.815664	0.206591	2
ENSMUSG00000110712	-0.84178	-0.366538	0.392233	1.22809	0.891753	-1.30376	4
ENSMUSG00000039342	-0.930393	-0.395523	1.38881	1.08732	-0.254642	-0.895568	4
ENSMUSG00000110596	-0.802849	-0.294111	1.80244	0.49039	-0.418188	-0.777679	4
ENSMUSG00000046330	-1.26194	-1.29493	0.378685	0.773823	0.736512	0.667846	3
ENSMUSG00000039323	-1.18521	-0.947681	1.12693	1.09159	0.297772	-0.383393	4
ENSMUSG00000026185	1.14238	0.724199	0.842281	-0.92714	-0.975213	-0.806503	2
ENSMUSG00000101968	-0.670746	-0.785282	1.66498	0.71016	-0.802026	-0.117083	4
ENSMUSG00000102266	1.15949	1.20383	-0.856681	-0.841771	-0.853431	0.188567	2
ENSMUSG00000101112	1.28068	1.29763	-0.683937	-0.671062	-0.681255	-0.542053	2
ENSMUSG00000100444	0.45917	-0.715584	-0.776712	-0.764424	1.75723	0.040323	3
ENSMUSG00000100301	0.858801	0.860934	0.768543	-0.194992	-1.50927	-0.784015	2
ENSMUSG00000101344	1.17752	0.820755	0.67492	-0.633618	-0.981955	-1.05763	2
ENSMUSG00000055322	-0.630878	-0.73735	-0.811812	0.051771	0.311864	1.81641	1
ENSMUSG00000061815	-1.37732	-0.662521	0.115807	0.409593	1.57457	-0.0601254	3
ENSMUSG00000006304	0.377986	0.0427053	-1.05158	-0.840477	-0.254429	1.72579	1
ENSMUSG00000064272	1.53876	0.774686	-0.911259	-0.896839	-0.619875	0.114527	2
ENSMUSG00000006299	0.129599	-1.06524	-1.39086	0.507474	0.941333	0.877693	3
ENSMUSG00000026179	0.607244	0.234766	-0.917766	-0.861384	-0.661197	1.59834	1
ENSMUSG00000006301	1.45983	0.688611	-0.136005	-0.90189	-1.24308	0.132537	2
ENSMUSG00000103403	-0.621479	-0.636704	-0.645218	0.922003	1.59984	-0.618446	3
ENSMUSG00000026177	-1.37947	-1.07565	0.694169	0.0705791	0.73451	0.955865	3
ENSMUSG00000026176	-0.252241	0.517588	1.34724	-0.291801	-1.63405	0.313265	2
ENSMUSG00000026175	0.991152	1.06922	0.403063	-0.22473	-0.84049	-1.39821	2
ENSMUSG00000033364	0.277009	0.631728	0.646414	0.359052	0.0785929	-1.9928	4
ENSMUSG00000103227	-1.08931	-1.191	1.18934	0.644278	0.705813	-0.259119	4
ENSMUSG00000026174	-1.49092	0.364603	-0.504518	0.0945697	-0.00668817	1.54295	1
ENSMUSG00000026173	-1.11327	-1.07679	0.903398	0.905583	0.858501	-0.477429	4
ENSMUSG00000026135	1.55353	0.460315	-0.0534584	0.0162837	-0.531219	-1.44545	2
ENSMUSG00000026172	-1.14196	-1.34281	0.135483	0.927116	0.753661	0.668504	3
ENSMUSG00000026171	1.27588	0.91102	-0.488488	0.0635981	-0.26978	-1.49223	2
ENSMUSG00000033276	1.09861	1.07427	0.30745	-0.295365	-0.905148	-1.27982	2
ENSMUSG00000033257	0.881619	1.19974	0.38531	-0.187175	-1.10944	-1.17005	2
ENSMUSG00000026170	0.98866	1.52764	-0.865475	-0.447084	-0.689775	-0.513963	2
ENSMUSG00000033227	-0.370785	-0.066541	-0.539488	-0.484247	-0.547202	2.00826	1
ENSMUSG00000089964	-0.637156	-0.73916	1.77888	0.59666	-0.381194	-0.618028	4
ENSMUSG00000090071	0.693964	1.67764	-0.223458	-0.929146	-0.455041	-0.763958	2
ENSMUSG00000047021	-0.669475	-0.29386	1.11006	-0.911483	1.4095	-0.64475	4
ENSMUSG00000006538	-1.04601	-1.1242	0.0770408	1.39931	0.81453	-0.120665	3
ENSMUSG00000026162	-0.0299313	1.8028	-0.645493	-0.365228	0.29292	-1.05507	2
ENSMUSG00000026205	0.809507	1.3929	-0.185479	-0.3077	-0.216364	-1.49286	2
ENSMUSG00000033159	1.40014	0.640044	-0.15452	0.239724	-0.681915	-1.44347	2
ENSMUSG00000049339	-1.31008	-1.1894	0.619983	0.949955	0.738824	0.190716	3
ENSMUSG00000026197	-1.05825	-0.707732	-0.785474	0.416308	1.46097	0.674177	3
ENSMUSG00000026198	-1.72227	-0.266884	-0.278605	0.911521	0.937337	0.418898	3
ENSMUSG00000033124	-0.00109119	-0.603593	0.0291481	1.09797	1.02191	-1.54434	4
ENSMUSG00000026199	-0.31865	-1.49603	-0.59338	0.788067	0.37696	1.24303	3
ENSMUSG00000026200	-0.700369	-1.37184	0.0775393	0.108442	0.298573	1.58765	3
ENSMUSG00000026201	-1.51483	-0.977624	0.325086	0.791799	0.875966	0.499602	3
ENSMUSG00000026202	-0.352259	0.402515	-0.973328	-0.532852	-0.372661	1.82858	1
ENSMUSG00000096094	-0.442306	0.386754	-0.620091	-0.603577	-0.60292	1.88214	1
ENSMUSG00000026203	-0.532302	0.291972	-1.53069	0.47674	-0.135009	1.42929	1
ENSMUSG00000026204	0.0184985	0.985138	-0.0764419	-0.905922	-1.27602	1.25475	1
ENSMUSG00000026209	-1.44586	-1.03817	0.238014	0.560199	0.701083	0.984735	3
ENSMUSG00000026208	-0.949223	-1.05669	1.03404	-0.483172	0.170251	1.2848	3
ENSMUSG00000026207	-0.423737	-0.850275	-0.735044	1.16214	1.3847	-0.537788	3
ENSMUSG00000033021	-0.561513	-0.527511	-1.31567	0.27848	0.652316	1.4739	1
ENSMUSG00000032997	0.491667	0.14718	-0.374362	-0.796001	-1.11656	1.64807	1
ENSMUSG00000026211	0.0123936	0.084212	-0.876838	-0.238317	-0.841354	1.8599	1
ENSMUSG00000051703	-0.182057	-0.218238	-0.816729	-0.703034	-0.0183915	1.93845	1
ENSMUSG00000026213	-0.949661	-1.50907	0.35451	1.07598	0.580451	0.447791	3
ENSMUSG00000006576	-0.561266	-0.979901	0.912759	1.08607	0.667653	-1.12532	4
ENSMUSG00000100827	-0.306894	2.03282	-0.494541	-0.476204	-0.469682	-0.285501	2
ENSMUSG00000100553	0.85418	1.07727	0.584423	-0.265398	-0.837509	-1.41296	2
ENSMUSG00000026235	1.14479	0.829715	-0.4037	-1.10388	-1.10251	0.635584	2
ENSMUSG00000101849	-0.597874	0.139661	-0.844512	-0.763818	0.261544	1.805	1
ENSMUSG00000102052	1.0034	1.39951	0.0124695	-0.706389	-1.04823	-0.660764	2
ENSMUSG00000004872	0.566405	0.126182	1.38959	-0.0578357	-1.59526	-0.429073	2
ENSMUSG00000032908	1.28831	1.00252	0.0955627	-1.12359	-0.266505	-0.996293	2
ENSMUSG00000026245	1.05004	1.08239	-1.27141	-0.90494	-0.358494	0.402408	2
ENSMUSG00000101798	-0.988551	0.311715	-0.176573	-1.18024	1.48243	0.551221	1
ENSMUSG00000012187	-0.891933	-0.466975	1.59025	0.816065	-0.175135	-0.872272	4
ENSMUSG00000099364	0.0588042	1.75932	-0.180385	-0.932261	-0.965455	0.259978	2
ENSMUSG00000100562	0.53862	0.345509	1.58944	-0.883224	-0.893929	-0.696417	2
ENSMUSG00000032883	1.46881	0.923435	-0.0906853	-0.40975	-0.835682	-1.05612	2
ENSMUSG00000079470	-0.772398	-0.580024	1.52188	0.820123	0.0477216	-1.0373	4
ENSMUSG00000099377	-1.8372	-0.18626	0.888656	0.874148	0.163282	0.0973793	3
ENSMUSG00000072978	-1.32206	-1.16536	0.279498	0.806668	1.00353	0.397719	3
ENSMUSG00000050711	1.15073	0.637896	0.662533	-1.16401	-1.2122	-0.0749526	2
ENSMUSG00000054702	0.663587	0.181555	0.449155	0.600136	0.0945011	-1.98893	4
ENSMUSG00000102235	-0.682489	0.471045	1.78348	-0.828972	-0.0814955	-0.661572	4
ENSMUSG00000073643	-0.581111	-0.938556	-1.05901	0.36837	0.903303	1.30701	3
ENSMUSG00000026248	-0.0894548	-1.25574	-1.12624	0.711531	1.09417	0.665736	3
ENSMUSG00000026249	1.35276	1.10552	-0.619587	-0.878743	-0.886813	-0.0731363	2
ENSMUSG00000067106	-1.05434	-1.03606	-0.359898	0.14376	1.20171	1.10483	3
ENSMUSG00000100397	-0.395157	-0.834828	1.32097	0.698731	0.500103	-1.28982	4
ENSMUSG00000102518	1.21784	1.34569	-0.741004	-0.718358	-0.677073	-0.427102	2
ENSMUSG00000043230	1.18663	1.02415	-0.427129	-1.12799	0.33295	-0.988614	2
ENSMUSG00000101257	1.24352	1.13098	-0.146998	-0.80665	-0.214037	-1.20682	2
ENSMUSG00000004364	-0.938293	-1.27521	1.30655	0.788854	0.339328	-0.221225	4
ENSMUSG00000103076	-0.381467	-0.515045	2.02974	-0.53044	-0.245219	-0.357572	4
ENSMUSG00000103525	-1.24094	0.0435384	0.768368	0.795228	0.858139	-1.22433	4
ENSMUSG00000101722	-0.503433	-0.618067	1.89382	0.357291	-0.643348	-0.486261	4
ENSMUSG00000038608	0.784031	1.00311	-0.278344	-1.39002	-0.88473	0.76595	2
ENSMUSG00000103192	-0.352701	-0.497767	-0.00745512	-0.519766	-0.616645	1.99433	1
ENSMUSG00000054976	1.16396	1.15954	0.198235	-0.962572	-1.02382	-0.53535	2
ENSMUSG00000087008	-0.514688	0.0949023	-0.673097	-0.65339	-0.204217	1.95049	1
ENSMUSG00000055980	-0.7186	-0.931886	0.71148	-1.04664	0.847644	1.138	3
ENSMUSG00000026142	1.24587	1.11251	0.0189079	-0.359717	-1.15894	-0.858629	2
ENSMUSG00000104493	1.2002	0.463918	-0.993432	-0.981164	0.975757	-0.665283	2
ENSMUSG00000100786	0.740304	0.884259	1.0102	-0.598152	-0.688275	-1.34834	2
ENSMUSG00000067158	-0.86206	1.07032	-0.894291	0.421144	-0.892024	1.15691	1
ENSMUSG00000079465	0.966407	1.26331	0.312104	-0.525989	-1.18716	-0.82867	2
ENSMUSG00000097564	-0.777904	0.761033	1.01073	-1.60938	0.393115	0.222403	1
ENSMUSG00000026150	0.372218	1.74127	-0.165452	-0.876508	-1.0152	-0.0563222	2
ENSMUSG00000100744	-0.733288	-0.93714	1.33963	1.14491	-0.135742	-0.678374	4
ENSMUSG00000026159	-1.28552	0.870429	1.09168	-0.968997	-0.310036	0.602446	1
ENSMUSG00000101784	-0.00505948	-0.12549	1.95066	-0.39289	-0.657414	-0.769805	4
ENSMUSG00000038496	-0.634029	-0.796859	0.873544	0.970763	0.835429	-1.24885	4
ENSMUSG00000100432	-0.749772	-0.913202	0.657876	1.62264	0.108047	-0.725586	4
ENSMUSG00000026166	-0.743778	0.198264	1.85696	-0.93615	-0.266294	-0.109006	4
ENSMUSG00000053161	1.23088	1.01068	0.359903	-0.746425	-0.759895	-1.09514	2
ENSMUSG00000101896	0.0525461	0.799814	1.55484	-0.83206	-0.847344	-0.727797	2
ENSMUSG00000079140	-1.14754	-0.387894	-0.331927	-0.246548	1.80777	0.306139	3
ENSMUSG00000045658	1.21053	1.15313	-0.0730745	-0.969779	-1.1002	-0.22061	2
ENSMUSG00000036766	-0.417072	-0.265598	0.756094	0.56948	1.03	-1.67291	4
ENSMUSG00000104396	-0.797963	-0.979159	0.337502	0.0481123	-0.38131	1.77282	1
ENSMUSG00000102481	1.25994	1.14866	-0.853651	-0.841793	-0.804633	0.0914791	2
ENSMUSG00000026219	0.981811	1.30259	0.276248	-1.01874	-0.636018	-0.905892	2
ENSMUSG00000103505	-1.00522	-1.04827	-0.587622	0.518912	0.950983	1.17121	3
ENSMUSG00000104503	-1.34007	-1.15695	0.287594	0.730729	0.460302	1.0184	3
ENSMUSG00000073633	-1.3555	-0.334663	1.19325	0.842585	0.481798	-0.827472	4
ENSMUSG00000026220	-1.66277	-0.433321	0.0350793	0.684136	0.127066	1.24981	3
ENSMUSG00000118590	0.356631	0.702505	0.0305792	0.312773	0.582704	-1.98519	2
ENSMUSG00000099693	-1.10293	-0.679868	0.770305	0.990336	0.945675	-0.923519	4
ENSMUSG00000052477	-0.635335	-0.675688	0.742712	1.07572	0.819207	-1.32661	4
ENSMUSG00000064281	-1.17643	-1.27879	0.355794	0.867646	1.02982	0.201961	3
ENSMUSG00000118640	0.102169	-0.434496	0.623322	1.20721	0.208127	-1.70633	4
ENSMUSG00000061852	-0.971622	0.32654	0.697104	0.52756	0.938438	-1.51802	4
ENSMUSG00000089976	-0.983515	-1.03741	1.46479	0.368627	0.667083	-0.479573	4
ENSMUSG00000101279	-1.69323	-0.124635	0.880603	0.747675	0.713253	-0.523665	4
ENSMUSG00000089844	-1.25188	-0.649819	1.00223	1.0764	0.556423	-0.733364	4
ENSMUSG00000073631	-0.653573	-0.884683	1.15793	0.776841	0.741767	-1.13828	4
ENSMUSG00000072109	0.458849	0.405976	0.22209	0.355065	0.584687	-2.02667	4
ENSMUSG00000090186	0.0412227	0.616373	-0.520115	0.380956	1.16703	-1.68546	4
ENSMUSG00000089716	-1.17403	-0.22559	1.10469	0.905883	0.51402	-1.12498	4
ENSMUSG00000079457	-1.18508	-0.123558	0.417291	1.06114	0.979466	-1.14926	4
ENSMUSG00000090252	-1.10694	-1.00088	0.82499	1.11668	0.727875	-0.561722	4
ENSMUSG00000079455	0.32426	-0.212855	0.629453	0.553964	0.638703	-1.93353	4
ENSMUSG00000091199	-0.580835	-1.47947	0.173067	1.34663	-0.221781	0.762386	3
ENSMUSG00000089652	-1.67027	0.600066	0.0519475	1.08581	-0.610897	0.543349	3
ENSMUSG00000089937	-1.10189	0.234606	0.758352	1.10993	0.342927	-1.34393	4
ENSMUSG00000118591	0.27917	0.216138	-0.148333	0.786557	0.773426	-1.90696	4
ENSMUSG00000101751	-1.55941	-0.442455	0.916732	0.814725	0.780087	-0.509682	4
ENSMUSG00000089714	-0.931934	-0.410476	0.135052	1.85792	-0.700307	0.0497448	4
ENSMUSG00000118607	-0.298469	0.24189	0.496337	0.834322	0.607612	-1.88169	4
ENSMUSG00000070034	0.527723	0.546947	0.19388	0.34185	0.413654	-2.02405	2
ENSMUSG00000090103	-1.06293	-0.130043	-0.0690679	0.904433	1.3967	-1.0391	3
ENSMUSG00000070031	-0.581317	-1.35052	0.746552	1.04776	0.834782	-0.697257	4
ENSMUSG00000073628	0.292832	0.0587328	0.326149	0.510754	0.790926	-1.97939	4
ENSMUSG00000090246	-0.750504	-0.428388	1.55231	0.968254	-0.615977	-0.725692	4
ENSMUSG00000026222	0.819179	1.03996	0.230836	-1.47039	-0.957921	0.338339	2
ENSMUSG00000052760	-1.48581	-1.03195	0.590143	0.465652	0.947408	0.514558	3
ENSMUSG00000100217	-0.841342	-0.901442	0.806363	1.43049	0.327849	-0.821916	4
ENSMUSG00000036707	-0.901382	-0.908014	0.559615	0.89685	1.22127	-0.868339	4
ENSMUSG00000026223	0.0832182	-0.493248	-1.73633	0.858111	0.934619	0.353634	3
ENSMUSG00000099342	-1.45392	-0.799652	1.36766	0.46801	0.395789	0.0221151	4
ENSMUSG00000026227	-0.773009	-0.90984	1.63382	0.292785	0.506545	-0.750305	4
ENSMUSG00000026229	1.18049	0.282881	-1.42901	-0.868703	-0.019663	0.854008	1
ENSMUSG00000077274	-1.59148	-0.883126	0.457229	0.888967	0.724358	0.404054	3
ENSMUSG00000026228	-1.22589	-0.769824	-0.491188	1.02042	0.210379	1.2561	3
ENSMUSG00000103272	-0.587084	0.104321	-0.865601	-0.833449	0.450441	1.73137	1
ENSMUSG00000062590	0.224946	0.575103	0.377257	1.11273	-1.7	-0.590036	2
ENSMUSG00000087538	-0.193569	-0.271533	1.52232	0.825726	-0.699857	-1.18309	4
ENSMUSG00000079445	0.736877	-0.419703	-1.44967	-0.268254	-0.0500551	1.45081	1
ENSMUSG00000026234	-0.926613	-0.661172	-1.03694	0.404817	1.13345	1.08646	3
ENSMUSG00000064823	-1.10993	-1.37523	0.639194	1.01833	0.203181	0.624454	3
ENSMUSG00000073627	1.29072	0.674756	0.165569	0.226234	-1.0743	-1.28298	2
ENSMUSG00000026237	0.767257	1.49763	-0.141973	-1.02749	-1.04398	-0.0514422	2
ENSMUSG00000036574	-0.413108	-0.539197	2.00507	-0.607369	-0.0642082	-0.381184	4
ENSMUSG00000101328	-0.856337	-0.961499	0.977561	0.459503	1.2158	-0.835028	4
ENSMUSG00000026238	-0.906194	-1.41125	-0.168269	0.654799	0.751167	1.07975	3
ENSMUSG00000026239	-0.784641	1.77036	-0.0480212	-0.844397	-0.561673	0.468371	1
ENSMUSG00000026240	0.993542	-0.465318	-0.684065	1.10914	0.429947	-1.38324	4
ENSMUSG00000026241	-0.221319	-1.33251	-0.0590647	0.549666	1.60506	-0.541842	3
ENSMUSG00000053333	1.24052	0.882895	-0.826482	-1.1406	-0.663554	0.507214	2
ENSMUSG00000084106	-1.37998	-1.14923	0.292298	0.62822	0.825624	0.783063	3
ENSMUSG00000099401	0.614575	-0.728095	1.59721	-0.103103	-0.15295	-1.22763	4
ENSMUSG00000101940	-0.694827	-0.224288	-0.0512981	1.97535	-0.333172	-0.671764	4
ENSMUSG00000101625	-0.673417	-0.834284	1.61821	0.0623471	-0.865227	0.692375	4
ENSMUSG00000026246	-1.21332	-0.983408	0.536459	1.00527	1.05134	-0.396351	3
ENSMUSG00000079440	1.01605	-0.263097	-1.52861	-0.690891	0.666023	0.800529	1
ENSMUSG00000036500	1.51072	0.41323	0.376579	-1.35537	-0.226146	-0.719009	2
ENSMUSG00000026247	1.27283	-0.277193	-0.0602745	0.860408	-0.209858	-1.58591	2
ENSMUSG00000036480	1.24928	0.929265	0.457962	-1.01502	-0.707876	-0.913613	2
ENSMUSG00000026251	1.14394	1.05518	-0.414405	-0.325797	0.0566387	-1.51556	2
ENSMUSG00000026253	0.931347	1.3473	0.151295	-0.362861	-1.14847	-0.918609	2
ENSMUSG00000026254	-1.54568	-0.977464	0.449695	0.639868	0.62674	0.806838	3
ENSMUSG00000026255	-0.431483	-0.972676	0.328525	0.330217	1.67135	-0.925931	3
ENSMUSG00000048000	0.30802	0.269809	0.835603	0.405285	0.166738	-1.98546	4
ENSMUSG00000079436	-1.65384	0.925642	-0.141671	-0.462778	1.04434	0.288313	3
ENSMUSG00000089613	-0.839723	-0.990311	0.522776	0.415075	-0.665342	1.55753	1
ENSMUSG00000026259	-0.136573	0.996041	0.115856	0.520693	0.389021	-1.88504	4
ENSMUSG00000026288	0.851689	0.346717	-1.81192	-0.448224	0.299782	0.761957	1
ENSMUSG00000026289	1.82043	-0.808211	-0.396488	0.415747	-0.223513	-0.807968	2
ENSMUSG00000087968	-1.71311	-0.563647	1.00767	0.688398	0.502072	0.0786154	3
ENSMUSG00000089281	-0.91904	-0.71101	1.13026	1.25084	0.137177	-0.888222	4
ENSMUSG00000056055	-1.11838	-0.275578	0.344408	0.986668	1.16704	-1.10416	4
ENSMUSG00000070738	1.26829	1.04639	0.0388731	-0.243773	-1.12561	-0.984169	2
ENSMUSG00000103996	-1.03843	-1.12496	1.4639	-0.239719	0.384154	0.555052	3
ENSMUSG00000005501	-0.365062	-1.05557	-0.987529	0.0528744	1.15738	1.19791	3
ENSMUSG00000054545	-0.666285	-0.888584	1.13259	-1.00369	1.19238	0.233599	3
ENSMUSG00000081984	-0.813266	-0.562718	0.764951	1.18964	0.67355	-1.25215	4
ENSMUSG00000079429	1.17039	1.17151	-0.107711	-0.308547	-0.577524	-1.34812	2
ENSMUSG00000044783	1.37314	0.934911	-0.161049	-0.0589295	-0.919515	-1.16855	2
ENSMUSG00000036251	-0.232459	0.76219	0.312144	-1.09547	-1.10515	1.35874	1
ENSMUSG00000100798	-0.253206	2.02077	-0.54152	-0.49638	-0.517379	-0.212283	2
ENSMUSG00000049866	-0.990747	-0.0257408	-1.10651	1.13499	-0.219134	1.20713	1
ENSMUSG00000097398	-0.723536	-0.845715	-0.517161	-0.431549	0.996773	1.52119	1
ENSMUSG00000036206	1.22157	0.591296	-0.775107	-1.35877	-0.413764	0.734778	2
ENSMUSG00000101288	1.05471	1.29318	0.198209	-0.872639	-0.921169	-0.752289	2
ENSMUSG00000055013	1.26536	0.959446	0.407541	-0.900439	-0.895186	-0.836718	2
ENSMUSG00000101662	0.370862	1.18158	1.06504	-0.717697	-1.02851	-0.871272	2
ENSMUSG00000034486	1.13031	1.07379	0.379897	-0.527127	-1.15461	-0.902263	2
ENSMUSG00000092627	0.671511	-0.450653	0.114542	-1.36049	-0.47653	1.50162	1
ENSMUSG00000026301	0.95208	0.816272	0.700271	-0.118131	-0.891959	-1.45853	2
ENSMUSG00000044337	0.410562	0.767712	-1.66923	-0.673121	0.178877	0.985204	1
ENSMUSG00000101997	1.54225	0.953646	-0.346816	-0.83799	-0.778113	-0.532975	2
ENSMUSG00000103292	1.28606	0.816677	-1.13117	-0.121209	-1.14048	0.29011	2
ENSMUSG00000034432	1.50346	1.04026	-0.808276	-0.580384	-0.588341	-0.566718	2
ENSMUSG00000048126	1.16467	0.781903	-0.0216695	-0.124745	-1.7355	-0.0646584	2
ENSMUSG00000026303	1.19017	1.16947	-0.119352	-1.24918	-0.769408	-0.221692	2
ENSMUSG00000026304	-0.568159	0.738043	-0.805666	-0.727896	-0.324081	1.68776	1
ENSMUSG00000026305	1.1803	1.02065	0.360888	-0.449486	-1.08683	-1.02552	2
ENSMUSG00000070732	0.0454394	0.633641	1.41075	-0.431254	-1.55206	-0.106517	2
ENSMUSG00000100018	-0.543585	1.30066	0.614259	-1.26152	0.665516	-0.775326	2
ENSMUSG00000034353	-0.343656	1.08	-1.37087	0.0207062	1.21449	-0.600662	2
ENSMUSG00000034343	-1.8011	-0.255022	0.000436316	0.304114	0.696191	1.05538	3
ENSMUSG00000083064	-1.14499	-0.968904	0.564314	1.09742	0.976152	-0.523992	3
ENSMUSG00000026307	-0.321879	-1.19901	1.02222	0.275771	-0.963944	1.18684	1
ENSMUSG00000090322	-0.992313	-1.0525	0.00636812	1.63322	0.483681	-0.0784551	3
ENSMUSG00000026308	1.26977	0.997354	0.145731	-1.18557	-0.940024	-0.287266	2
ENSMUSG00000047443	-0.268577	0.711751	1.07389	0.39347	-0.15272	-1.75781	4
ENSMUSG00000026309	-0.486293	-1.45998	-0.199525	0.659766	0.0175062	1.46853	3
ENSMUSG00000067071	1.03595	1.18231	-0.43625	-1.06932	-1.04236	0.329662	2
ENSMUSG00000055866	0.678639	0.473008	0.284541	0.149096	0.42308	-2.00836	2
ENSMUSG00000101958	1.3188	1.08758	-0.129102	-0.976799	-1.01184	-0.288637	2
ENSMUSG00000034292	-0.21441	-1.69192	-0.342112	0.940482	0.996396	0.311566	3
ENSMUSG00000026311	-0.249266	0.943974	-0.414232	-1.19933	-0.544234	1.46308	1
ENSMUSG00000026313	0.97306	-0.30345	-0.225793	-0.119308	-1.54847	1.22396	1
ENSMUSG00000026260	1.20124	0.599325	-1.46307	-0.604883	-0.438851	0.706241	1
ENSMUSG00000046300	-0.216514	-0.487631	-0.589884	-0.541814	2.01077	-0.174931	3
ENSMUSG00000073616	-0.427776	0.0129435	1.49706	-0.202504	-1.47612	0.596397	4
ENSMUSG00000100546	1.05752	1.18855	0.217109	-0.340449	-1.2241	-0.898629	2
ENSMUSG00000034220	0.951217	0.757712	0.0121954	0.665358	-1.53277	-0.85371	2
ENSMUSG00000034212	1.06855	1.26124	-0.184782	-1.02366	-1.08828	-0.0330647	2
ENSMUSG00000047067	-0.948257	-1.50315	0.840935	0.926779	0.485982	0.197708	3
ENSMUSG00000097251	0.149732	-0.35252	-0.87303	1.88788	-0.0919504	-0.720116	4
ENSMUSG00000026269	-1.22179	-0.93858	-0.372314	0.829704	1.26935	0.433626	3
ENSMUSG00000100632	-1.13292	0.210471	1.39488	-0.0502022	0.692995	-1.11523	4
ENSMUSG00000026270	0.534877	-1.10493	-0.335364	0.576905	-1.05922	1.38773	1
ENSMUSG00000026271	0.963209	1.19109	0.352659	-0.757709	-1.33565	-0.413603	2
ENSMUSG00000014602	-1.28025	-0.246283	1.72126	-0.333351	-0.259953	0.398583	4
ENSMUSG00000047793	1.51838	0.543902	0.137709	-0.236954	-1.42696	-0.536075	2
ENSMUSG00000026273	-0.288375	1.7296	-1.23805	0.133337	0.230597	-0.567106	2
ENSMUSG00000101172	0.968347	1.43483	-0.461688	-0.934344	-0.956481	-0.0506607	2
ENSMUSG00000100351	-0.455955	-0.746385	-1.07639	1.012	1.42392	-0.157193	3
ENSMUSG00000026274	-0.393196	-1.71081	0.0943595	1.21081	0.648915	0.149924	3
ENSMUSG00000026275	-2.02252	0.317068	0.373436	0.65474	0.414179	0.263092	3
ENSMUSG00000034107	0.000548813	1.72288	0.406689	-1.054	-0.24109	-0.835022	2
ENSMUSG00000034088	0.182002	0.470211	-1.23517	-1.23773	0.786489	1.0342	1
ENSMUSG00000090489	-0.538439	-0.704954	0.820624	-0.727721	1.65883	-0.508339	4
ENSMUSG00000026276	-1.35627	-0.411281	0.825153	0.940994	0.84481	-0.843411	4
ENSMUSG00000034066	1.04174	0.576104	-0.373667	0.600348	-0.0910873	-1.75344	2
ENSMUSG00000026277	1.57668	0.840768	-0.135863	-0.614194	-0.730276	-0.937116	2
ENSMUSG00000100927	1.20756	-1.12568	0.973643	0.347641	-0.368898	-1.03427	4
ENSMUSG00000026278	-1.34389	-1.03423	-0.00119083	0.532918	1.18369	0.662713	3
ENSMUSG00000026279	-1.19826	-1.15954	0.306366	0.948787	1.10705	-0.00439879	3
ENSMUSG00000101952	-1.27222	-0.999402	0.540749	0.907065	1.09313	-0.269322	3
ENSMUSG00000026280	-0.76105	-1.06084	-0.679906	0.700141	1.50081	0.300844	3
ENSMUSG00000026281	-1.16733	-1.35114	0.42664	0.573564	0.486914	1.03135	3
ENSMUSG00000026283	0.774384	0.523586	-1.95003	-0.124734	0.332176	0.444615	1
ENSMUSG00000073609	-1.34184	-1.01113	0.0896379	0.692498	0.308066	1.26277	3
ENSMUSG00000094651	-0.496685	-0.0496927	1.42959	0.763331	-0.203235	-1.44331	4
ENSMUSG00000101660	-1.32216	-0.924783	-0.166567	0.669397	0.424927	1.31919	3
ENSMUSG00000093805	-0.475595	0.113481	1.44585	0.803759	-0.595115	-1.29238	4
ENSMUSG00000099624	-1.59546	-0.547705	-0.174308	0.697639	0.406498	1.21334	3
ENSMUSG00000073608	1.30008	1.09563	0.00327599	-0.545625	-0.709639	-1.14372	2
ENSMUSG00000026285	1.06528	1.1992	0.354666	-0.900719	-0.941457	-0.776968	2
ENSMUSG00000100347	0.751512	0.908873	0.902144	-0.2361	-1.03392	-1.29251	2
ENSMUSG00000051185	-1.98254	0.0825083	0.243908	0.365929	0.781149	0.509049	3
ENSMUSG00000103973	-0.736777	-0.925203	0.984724	-1.02135	1.1192	0.579404	3
ENSMUSG00000081051	-1.62895	-0.792574	0.180088	0.730497	0.829083	0.681853	3
ENSMUSG00000100362	-1.10898	-0.452198	0.828731	0.796018	1.02728	-1.09084	4
ENSMUSG00000040693	-0.595023	-0.585368	0.264816	0.730629	1.44935	-1.26441	4
ENSMUSG00000097814	-1.32473	-1.20655	0.585505	0.92755	0.325041	0.693185	3
ENSMUSG00000045463	0.673805	1.54643	0.0129165	-1.01066	-1.05039	-0.172095	2
ENSMUSG00000100454	-0.830564	-1.3686	0.740536	0.856131	0.99919	-0.396693	3
ENSMUSG00000044757	-0.946196	-1.26304	-0.207015	1.05725	1.14068	0.218318	3
ENSMUSG00000100484	1.02972	1.39175	-0.241006	-0.958107	-0.985064	-0.237292	2
ENSMUSG00000044768	1.07157	1.084	0.384181	-0.393599	-0.884402	-1.26175	2
ENSMUSG00000040648	1.31349	1.20328	-0.267648	-0.874955	-0.837906	-0.536265	2
ENSMUSG00000026333	-1.34982	-0.918507	-0.163806	0.411636	1.23032	0.790169	3
ENSMUSG00000026335	0.0413555	1.86352	-0.504995	-0.779275	-0.795436	0.174828	2
ENSMUSG00000089782	-0.518717	-1.34262	-0.692425	0.553154	1.26644	0.73417	3
ENSMUSG00000089706	-0.459934	-0.0892992	-0.163919	-0.600781	-0.671467	1.9854	1
ENSMUSG00000100711	-0.227679	-0.490758	2.01424	-0.570875	-0.537832	-0.187094	4
ENSMUSG00000099634	-1.00356	-1.08124	0.907195	1.00751	0.781909	-0.611813	4
ENSMUSG00000089791	-1.11364	-1.00652	1.25667	0.742041	0.612758	-0.491308	4
ENSMUSG00000099686	-0.486587	0.65494	1.74771	-0.727782	-0.742645	-0.44564	4
ENSMUSG00000082431	-1.70423	0.329191	1.35469	-0.308769	0.200288	0.128837	4
ENSMUSG00000100222	-0.683049	-0.843845	-0.8924	0.406148	1.6522	0.360949	3
ENSMUSG00000100955	1.20086	0.991595	-0.908895	-0.896591	-0.852967	0.465997	2
ENSMUSG00000050840	1.25561	1.10737	-0.141707	-1.14492	-0.916972	-0.15938	2
ENSMUSG00000047496	1.34434	1.02983	-0.125774	-1.28541	-0.466612	-0.496368	2
ENSMUSG00000101214	-0.0710435	0.328799	0.036726	-1.01463	-0.980959	1.7011	1
ENSMUSG00000067017	-0.51221	0.978319	-1.12857	-1.02986	0.761683	0.930639	1
ENSMUSG00000056536	1.09688	1.02031	0.576937	-0.936692	-0.903934	-0.853504	2
ENSMUSG00000100672	-0.395985	0.261063	1.52505	0.628243	-1.1032	-0.915169	4
ENSMUSG00000026319	0.469045	0.174926	1.70198	-0.887369	-0.756649	-0.701935	2
ENSMUSG00000104044	-1.11681	0.665235	-1.19847	-0.242494	0.836326	1.05622	1
ENSMUSG00000101330	-1.2664	-0.807523	0.762284	0.789942	1.0984	-0.576705	3
ENSMUSG00000026321	-1.1119	-0.202262	-1.16731	1.24789	0.761796	0.471791	3
ENSMUSG00000099843	1.84184	-0.0343416	0.0508688	-0.0877192	-1.00478	-0.765868	2
ENSMUSG00000038866	1.24687	0.819951	0.431744	-0.252262	-1.12159	-1.12472	2
ENSMUSG00000102501	1.20343	1.28576	-0.122071	-0.834381	-0.846468	-0.686274	2
ENSMUSG00000097612	1.28088	1.05355	-1.12492	-0.228684	-0.0157321	-0.965091	2
ENSMUSG00000044340	1.6508	0.456969	-0.487252	-1.18144	-0.62967	0.190594	2
ENSMUSG00000057329	0.673185	1.50583	0.355782	-0.879141	-0.895706	-0.759954	2
ENSMUSG00000009905	0.581728	-0.168051	-1.4553	1.07432	-0.841194	0.808502	1
ENSMUSG00000009907	-1.14193	0.643154	-1.24101	0.324672	0.143842	1.27127	1
ENSMUSG00000067006	-0.14236	1.26957	-0.70984	0.126471	-1.43385	0.890011	1
ENSMUSG00000059956	0.620521	1.51799	0.327359	-0.711703	-1.15854	-0.59562	2
ENSMUSG00000084228	1.45796	0.989839	-0.0780318	-0.837365	-0.847324	-0.685081	2
ENSMUSG00000044594	1.04354	1.20747	0.330027	-0.573527	-1.01222	-0.995286	2
ENSMUSG00000062345	1.17366	1.39755	-0.690232	-0.662752	-0.685492	-0.532737	2
ENSMUSG00000092572	0.36235	-0.0690112	-1.04847	0.17381	-1.04453	1.62585	1
ENSMUSG00000026315	1.04215	1.36799	-0.0460181	-0.92832	-0.989803	-0.446	2
ENSMUSG00000086161	0.738457	1.19656	0.123132	-1.25312	0.343621	-1.14865	2
ENSMUSG00000100457	1.08597	1.1723	-0.450643	-0.23455	-1.4761	-0.0969763	2
ENSMUSG00000100041	0.920992	1.53066	-0.787991	-0.748723	-0.780561	-0.134378	2
ENSMUSG00000100025	-0.528775	-0.639909	-0.667352	0.523421	1.82466	-0.512047	3
ENSMUSG00000026312	1.32779	0.644145	-1.11332	-1.08764	-0.31757	0.54659	2
ENSMUSG00000047216	1.3231	0.813318	0.379028	-1.01512	-1.12984	-0.370492	2
ENSMUSG00000038702	0.171089	-0.449204	0.537093	0.386273	1.11318	-1.75843	4
ENSMUSG00000070695	0.338377	0.395256	0.76444	0.612444	-1.93352	-0.176999	2
ENSMUSG00000094429	0.491974	1.73992	-0.202027	-0.882912	-0.92883	-0.218122	2
ENSMUSG00000107979	1.3157	1.1664	-0.391741	-0.890624	-0.947778	-0.251959	2
ENSMUSG00000101373	1.14071	1.306	-0.0560264	-0.800498	-1.00109	-0.589096	2
ENSMUSG00000100265	1.60332	0.888619	-0.403974	-0.763111	-0.753445	-0.571409	2
ENSMUSG00000100527	0.778018	1.68803	-0.675574	-0.665513	-0.643591	-0.481373	2
ENSMUSG00000101303	0.999235	1.19676	0.385645	-0.61889	-1.21735	-0.745397	2
ENSMUSG00000100305	0.923875	1.33817	0.157979	-1.05215	-1.06356	-0.30432	2
ENSMUSG00000101415	0.903011	1.57317	-0.272946	-0.765165	-0.807646	-0.630425	2
ENSMUSG00000100617	1.21508	1.16245	0.0990292	-0.561497	-1.0396	-0.875467	2
ENSMUSG00000100703	1.56029	0.972192	-0.680061	-0.655965	-0.67512	-0.521333	2
ENSMUSG00000102030	1.05896	1.23757	0.24611	-0.568319	-1.07236	-0.90196	2
ENSMUSG00000026374	-0.174285	-1.1126	-1.12462	0.531801	0.482955	1.39675	1
ENSMUSG00000026377	-1.97553	-0.0491339	0.433568	0.550363	0.697036	0.343696	3
ENSMUSG00000099936	-0.802071	-0.906209	1.84188	0.189163	0.00455242	-0.327316	4
ENSMUSG00000064302	0.932462	1.20541	0.29064	-1.00524	-1.24533	-0.177944	2
ENSMUSG00000107722	-1.23214	-0.666053	1.20274	0.493957	0.915403	-0.713903	4
ENSMUSG00000026380	-0.112309	-0.248225	-0.568383	-1.25151	0.516053	1.66437	1
ENSMUSG00000048402	1.23886	1.05277	0.0477567	-1.2908	-0.787624	-0.260962	2
ENSMUSG00000037035	-1.0308	-1.14926	-0.237338	0.685669	1.40934	0.322386	3
ENSMUSG00000004451	-1.3945	-0.601074	-0.303777	0.413271	0.37192	1.51416	3
ENSMUSG00000098447	-0.901581	-0.184868	0.890831	-1.18933	1.39456	-0.00960461	3
ENSMUSG00000098923	-1.74563	-0.636547	0.763057	0.673782	0.652265	0.293074	3
ENSMUSG00000026383	1.11214	1.32431	-0.306506	-1.08581	-0.831339	-0.212799	2
ENSMUSG00000102687	-0.508773	-0.623214	-0.673512	-0.64313	0.730539	1.71809	1
ENSMUSG00000026384	-1.65875	-0.534707	0.710182	0.0215311	0.289597	1.17215	3
ENSMUSG00000091876	-1.39396	-0.791384	0.542293	0.906564	1.09054	-0.354052	3
ENSMUSG00000036975	-1.22641	-1.32729	0.72464	0.759311	0.708646	0.3611	3
ENSMUSG00000036962	0.926059	0.977348	0.702829	-0.481817	-1.38198	-0.742434	2
ENSMUSG00000092245	1.04512	0.931418	0.683568	-0.802165	-1.24793	-0.610009	2
ENSMUSG00000050777	-1.4407	-0.627293	-0.082827	1.01441	1.21986	-0.0834485	3
ENSMUSG00000026385	1.08331	0.584333	0.334165	-1.09502	-1.39231	0.48553	2
ENSMUSG00000026388	1.24718	1.28266	-0.263641	-0.761996	-0.846587	-0.657619	2
ENSMUSG00000026389	-1.19343	-1.28725	0.19748	0.468069	0.989019	0.826113	3
ENSMUSG00000026390	0.838266	1.61703	-0.745267	-0.714869	-0.743442	-0.251717	2
ENSMUSG00000003721	-0.874455	0.260884	-1.23762	0.157673	0.0797127	1.6138	1
ENSMUSG00000104253	-0.714714	0.446698	1.73456	0.113939	-0.887705	-0.692777	4
ENSMUSG00000026339	-1.22201	0.00540496	-1.20858	0.57184	0.898763	0.954581	3
ENSMUSG00000085857	-0.508631	1.53794	0.778032	-0.998897	0.0680777	-0.876517	2
ENSMUSG00000050534	0.243802	-0.296005	-1.71238	0.496712	1.29357	-0.0257033	3
ENSMUSG00000001674	0.999203	-1.56212	0.880491	0.496517	-0.0843892	-0.729706	4
ENSMUSG00000100405	-1.00284	-0.28277	-0.777597	0.821401	1.58629	-0.344488	3
ENSMUSG00000036815	0.880011	1.27777	0.424856	-0.523464	-1.12522	-0.933944	2
ENSMUSG00000102801	0.871553	1.46117	0.158692	-0.857273	-0.888078	-0.74606	2
ENSMUSG00000026341	0.172673	1.19376	-0.19668	-1.35046	-0.822432	1.00314	1
ENSMUSG00000026342	0.440393	0.544255	-0.649857	-1.29936	-0.501068	1.46564	1
ENSMUSG00000049690	1.19447	1.0812	0.103546	-0.225181	-1.18393	-0.970116	2
ENSMUSG00000036155	1.15819	1.07762	-0.447724	-1.27096	-0.781928	0.264792	2
ENSMUSG00000104378	-0.47868	1.3085	-0.719289	-0.679756	-0.694479	1.2637	1
ENSMUSG00000099471	-0.682574	-1.34163	-0.486769	0.821364	1.2893	0.400313	3
ENSMUSG00000026347	0.601914	1.78659	-0.656672	-0.614566	-0.63843	-0.478838	2
ENSMUSG00000026348	-0.997687	-1.07894	1.37088	0.13503	-0.33918	0.909895	3
ENSMUSG00000102014	0.55402	-0.303849	1.33185	0.437584	-0.463898	-1.55571	4
ENSMUSG00000026349	1.40334	1.13003	-0.799981	-0.842654	-0.5042	-0.386537	2
ENSMUSG00000051590	-0.752262	1.07984	0.492896	-0.957223	-0.956193	1.09295	1
ENSMUSG00000036104	1.40048	1.1656	-0.497192	-0.626221	-0.717405	-0.725263	2
ENSMUSG00000036086	0.792615	0.798824	-1.40936	-0.26649	-0.872337	0.956746	1
ENSMUSG00000104164	-0.860629	-0.62567	-0.97726	1.44769	0.11998	0.895894	3
ENSMUSG00000058603	-1.42641	-1.10528	0.379027	0.826463	0.800187	0.526018	3
ENSMUSG00000103999	-0.514417	-0.693163	1.6694	-0.783931	0.794141	-0.472027	4
ENSMUSG00000056211	-0.415342	0.0675808	1.15045	0.521391	0.422152	-1.74623	4
ENSMUSG00000104239	-0.968253	-1.12021	1.34131	0.939733	0.134855	-0.327443	4
ENSMUSG00000102179	-1.85858	-0.145309	0.544195	0.675299	0.874258	-0.0898669	3
ENSMUSG00000103497	-1.20405	-1.31031	0.960341	0.729883	0.551275	0.272865	3
ENSMUSG00000026353	0.98388	0.780162	0.748011	-0.2708	-0.747217	-1.49404	2
ENSMUSG00000026354	0.850894	1.20086	-0.786124	-0.0436206	-1.46756	0.245554	2
ENSMUSG00000026355	-0.615648	-1.20802	-0.608732	0.449964	0.43281	1.54962	3
ENSMUSG00000026356	-1.10035	-0.553169	-0.343011	-0.0190299	0.191093	1.82447	1
ENSMUSG00000100078	-1.54772	-0.713295	-0.109692	0.600355	1.16468	0.605667	3
ENSMUSG00000045382	0.668019	1.40663	0.473549	-0.4992	-1.05973	-0.989274	2
ENSMUSG00000042581	1.22693	1.00866	0.31927	-0.538975	-1.17061	-0.845272	2
ENSMUSG00000089648	-0.728382	0.489057	0.692676	1.09959	0.0407185	-1.59365	4
ENSMUSG00000094122	-1.52819	-0.945262	0.431645	0.749028	0.953076	0.339704	3
ENSMUSG00000026401	1.26238	1.21568	-0.217468	-0.656626	-0.515881	-1.08809	2
ENSMUSG00000026399	1.29057	1.19728	-0.134273	-0.938978	-0.725654	-0.688951	2
ENSMUSG00000042554	1.20579	1.27017	-0.633196	-0.810857	-0.10251	-0.929403	2
ENSMUSG00000026405	-0.959302	-0.0923806	-1.24288	1.07603	1.16882	0.049705	3
ENSMUSG00000100257	-0.375502	0.00904904	-0.555416	-0.534505	-0.537558	1.99393	1
ENSMUSG00000026409	1.21246	0.458867	-1.39363	-1.01558	0.177157	0.560727	1
ENSMUSG00000046404	-1.32058	-1.14529	0.733369	0.570292	0.130583	1.03163	3
ENSMUSG00000042510	-0.73757	0.279763	0.552209	-0.83954	-0.870481	1.61562	1
ENSMUSG00000100106	-0.63041	-0.754339	0.75632	-0.759466	-0.286261	1.67416	1
ENSMUSG00000026415	-1.78178	0.476591	1.10743	-0.215307	-0.139927	0.552984	4
ENSMUSG00000026417	-0.948907	0.266164	-0.0550219	1.55125	-1.20938	0.395888	4
ENSMUSG00000026420	1.50041	1.04618	-0.704984	-0.678914	-0.682383	-0.480312	2
ENSMUSG00000026416	1.17912	1.37485	-0.401252	-0.736713	-0.789213	-0.626789	2
ENSMUSG00000016528	-1.49624	-0.948456	1.11077	0.482454	0.298036	0.553435	3
ENSMUSG00000016526	-1.34651	-1.17671	0.778325	0.658468	0.249328	0.837098	3
ENSMUSG00000026427	-1.63505	-0.305455	-0.308172	0.546226	0.409188	1.29326	3
ENSMUSG00000026430	1.2625	0.983205	0.140218	-0.237045	-0.909043	-1.23984	2
ENSMUSG00000042349	0.146858	0.626143	0.674574	-1.2231	-1.25464	1.03016	1
ENSMUSG00000102055	1.55541	0.95087	-0.765641	-0.365732	-0.762925	-0.611983	2
ENSMUSG00000026425	1.00356	0.830814	0.438688	-1.36359	-1.10174	0.192261	2
ENSMUSG00000055184	1.26944	0.697638	0.496959	-0.261846	-0.816955	-1.38524	2
ENSMUSG00000095841	1.49247	1.02681	-0.396333	-0.531084	-0.873567	-0.718296	2
ENSMUSG00000052688	1.7055	0.569416	-0.775218	-0.754029	-0.772529	0.0268636	2
ENSMUSG00000042268	1.22873	1.01841	0.334928	-0.679937	-1.13751	-0.764622	2
ENSMUSG00000042251	0.682506	0.698534	-0.376091	-1.07525	-1.13663	1.20694	1
ENSMUSG00000013275	1.20347	0.325934	0.396601	-0.39465	-1.75559	0.224241	2
ENSMUSG00000026433	0.293127	-0.793473	-0.688272	-1.05953	1.40785	0.840306	1
ENSMUSG00000100026	-0.549177	0.0569516	-0.706379	-0.0326426	-0.695319	1.92657	1
ENSMUSG00000026434	-1.46359	-0.222747	0.108803	-0.238313	0.169344	1.6465	1
ENSMUSG00000103569	-0.910351	-1.0317	1.53445	0.305736	-0.52075	0.622614	4
ENSMUSG00000026435	1.43335	0.750589	0.0933643	-0.263547	-0.635161	-1.37859	2
ENSMUSG00000026436	0.63672	0.921323	0.752065	-0.0949299	-0.508576	-1.7066	2
ENSMUSG00000059149	1.1882	0.929214	0.0289273	-0.238335	-0.303285	-1.60472	2
ENSMUSG00000103966	0.0963691	0.679749	1.60967	-0.89738	-0.855193	-0.633217	2
ENSMUSG00000026437	-1.15046	-1.25734	0.183708	0.590461	1.252	0.381633	3
ENSMUSG00000079330	0.172234	1.35654	0.574127	0.22932	-1.04714	-1.28508	2
ENSMUSG00000118219	-0.436275	-0.655473	-0.710853	1.64473	-0.681691	0.83956	3
ENSMUSG00000089808	-1.06312	-1.29891	0.0755124	0.408552	0.587827	1.29014	3
ENSMUSG00000009772	-1.06004	0.861753	0.864709	0.975389	-0.612555	-1.02926	4
ENSMUSG00000042066	0.914675	1.0817	0.44942	-0.118804	-0.976733	-1.35026	2
ENSMUSG00000042046	1.32507	0.887054	0.268711	-0.359398	-1.1142	-1.00723	2
ENSMUSG00000026439	1.12213	1.09573	-1.39544	-0.669437	-0.334469	0.181482	2
ENSMUSG00000048174	0.0953626	-0.486155	-1.59439	0.748037	-0.0476411	1.28478	1
ENSMUSG00000053024	1.37965	0.96257	0.13377	-0.860751	-0.57659	-1.03865	2
ENSMUSG00000026442	0.792787	1.11996	-0.304187	-1.70755	-0.178582	0.277569	2
ENSMUSG00000026443	0.806271	-0.582047	-0.652293	-0.611029	-0.636402	1.6755	1
ENSMUSG00000054387	0.766455	1.02927	0.739829	-0.205498	-1.00848	-1.32157	2
ENSMUSG00000100228	-1.32596	-0.969613	0.648052	0.733923	1.13714	-0.223545	3
ENSMUSG00000026447	0.418555	0.388058	0.371191	0.210203	0.634335	-2.02234	4
ENSMUSG00000101102	-0.799999	-0.388313	0.471869	-0.325123	1.81276	-0.771196	4
ENSMUSG00000102425	-0.0911008	-0.143589	0.161331	1.10966	0.742157	-1.77846	4
ENSMUSG00000046062	-1.10345	-1.41486	0.735676	0.939767	0.443618	0.399247	3
ENSMUSG00000041757	1.45957	0.848761	-0.0202774	-0.427708	-1.27331	-0.587034	2
ENSMUSG00000101693	1.03429	1.25747	0.279677	-0.67466	-1.03989	-0.856891	2
ENSMUSG00000103421	-0.739854	-0.930316	-0.983154	0.462018	1.15118	1.04013	3
ENSMUSG00000115958	-0.75733	-0.895458	-0.283304	-0.426962	1.7154	0.647655	3
ENSMUSG00000070645	-0.723162	-0.5701	-1.2498	0.322154	1.21054	1.01037	3
ENSMUSG00000070644	-0.967332	-0.668304	-0.470318	-0.118355	0.438117	1.78619	1
ENSMUSG00000070643	-1.13785	-1.37711	0.92065	0.763393	0.286433	0.544482	3
ENSMUSG00000090553	0.216814	-1.9965	0.381793	0.6656	0.131541	0.600748	3
ENSMUSG00000102976	-1.29358	-0.854454	0.807882	-0.435667	0.590141	1.18567	3
ENSMUSG00000094410	-1.31287	-1.26142	0.635234	0.569698	0.585807	0.783549	3
ENSMUSG00000051998	-0.388361	0.494918	-0.666559	-0.630324	-0.640592	1.83092	1
ENSMUSG00000026463	0.972507	0.822458	-0.533731	-1.08082	-1.06706	0.886645	2
ENSMUSG00000100830	0.249947	1.76462	0.262124	-0.827562	-0.824829	-0.624296	2
ENSMUSG00000041577	0.986313	1.15283	0.340507	-0.271869	-0.915235	-1.29254	2
ENSMUSG00000020423	0.526249	1.50212	0.317798	-0.959311	-1.18523	-0.201633	2
ENSMUSG00000026450	-1.05054	-0.0753852	1.14004	0.711217	0.591819	-1.31716	4
ENSMUSG00000064246	-0.639497	-0.116195	-0.828684	-0.0695563	-0.295139	1.94907	1
ENSMUSG00000042429	0.363676	-0.118122	-1.03013	-0.978167	0.0806969	1.68205	1
ENSMUSG00000026458	-0.665266	-1.48022	-0.00240389	1.0628	1.1118	-0.0267137	3
ENSMUSG00000042305	-1.76332	0.907049	-0.125994	-0.0569412	0.0151933	1.02402	1
ENSMUSG00000050526	-0.706009	0.891543	-0.342781	1.59668	-0.763406	-0.67603	4
ENSMUSG00000026456	-1.06144	-0.974157	-0.417292	0.349363	0.595823	1.5077	3
ENSMUSG00000026457	-0.774272	-1.60053	0.236583	0.589725	0.430619	1.11787	3
ENSMUSG00000101061	-0.480089	-0.624215	1.94403	-0.669934	-0.347	0.177209	4
ENSMUSG00000102722	-0.808562	-0.928908	1.47769	0.782013	0.264192	-0.786421	4
ENSMUSG00000026455	-0.253075	-1.56411	0.0214984	1.537	0.345247	-0.0865682	3
ENSMUSG00000042229	0.322112	1.45039	-1.50029	0.247849	0.155355	-0.675416	2
ENSMUSG00000096712	-0.631507	-1.33057	-0.644817	0.878002	1.1379	0.590994	3
ENSMUSG00000101955	0.144281	1.51918	0.794848	-0.929626	-0.705903	-0.822784	2
ENSMUSG00000046367	-1.12507	-0.0481813	1.34193	0.119252	0.824398	-1.11233	4
ENSMUSG00000042207	-1.40138	-1.12194	0.830854	0.755856	0.664669	0.271946	3
ENSMUSG00000097435	1.15852	1.09385	-0.050852	-1.46379	-0.220684	-0.517044	2
ENSMUSG00000026452	1.22421	0.908204	-1.3277	-0.863257	-0.259481	0.318029	2
ENSMUSG00000073557	1.46006	1.0995	-0.603161	-0.744746	-0.664184	-0.547474	2
ENSMUSG00000103614	-0.861524	1.26802	-0.708913	-0.95833	0.164428	1.09632	1
ENSMUSG00000103976	-0.766237	-0.527329	-0.922728	0.057056	0.390791	1.76845	1
ENSMUSG00000101168	-1.0655	-1.30049	1.19114	0.00305917	0.401403	0.770385	3
ENSMUSG00000026429	-0.659131	1.8147	0.23718	0.0805817	-0.487332	-0.985995	2
ENSMUSG00000042793	1.22808	0.924784	0.417858	-0.442963	-1.09624	-1.03152	2
ENSMUSG00000097993	0.0061865	0.449395	-1.27664	-0.234762	-0.602513	1.65833	1
ENSMUSG00000031506	0.292662	0.00560038	-0.952961	-0.933179	1.7621	-0.174226	1
ENSMUSG00000026426	0.361608	1.62688	-0.295236	-1.38719	-0.439563	0.133503	2
ENSMUSG00000026424	-1.6253	-0.288774	0.572572	0.900824	-0.500278	0.940958	3
ENSMUSG00000079139	-0.879252	-1.39115	0.640948	0.830609	1.05965	-0.260802	3
ENSMUSG00000097680	-1.17822	0.574233	0.376781	-1.24317	1.24195	0.228431	1
ENSMUSG00000003051	-0.491437	0.120914	-0.533615	-0.85569	-0.163738	1.92357	1
ENSMUSG00000041926	-0.745546	-0.919085	-0.667122	0.824026	1.57202	-0.0642904	3
ENSMUSG00000062580	-1.9007	-0.222865	0.355512	0.687316	0.818652	0.262085	3
ENSMUSG00000048096	-0.751781	-1.19926	1.07448	0.707282	0.899354	-0.73007	4
ENSMUSG00000041889	0.330315	1.78117	-0.505976	-0.0305561	-1.11999	-0.454961	2
ENSMUSG00000041879	-0.228287	0.11984	0.150987	-0.92978	-0.907793	1.79503	1
ENSMUSG00000009418	1.19309	0.815314	0.275667	-1.60822	-0.440512	-0.235333	2
ENSMUSG00000026421	-0.0370296	0.018497	-1.78293	-0.0336934	1.1768	0.658362	1
ENSMUSG00000041801	-0.848487	-0.942526	-0.687927	0.0648215	1.21901	1.19511	3
ENSMUSG00000026418	-0.528877	-0.664907	-0.719118	0.673421	1.74655	-0.507071	3
ENSMUSG00000041782	0.368478	0.00791695	-0.616529	-1.35967	-0.023394	1.6232	1
ENSMUSG00000026414	-1.01898	0.633921	-0.449225	-1.16356	0.933885	1.06396	1
ENSMUSG00000101482	0.547221	1.63868	0.17209	-0.502764	-1.00489	-0.850338	2
ENSMUSG00000026413	-0.711783	1.18029	0.433751	-0.966082	-0.962268	1.02609	1
ENSMUSG00000051985	0.425678	1.5413	-0.851816	-0.82629	-0.84911	0.560241	2
ENSMUSG00000026411	0.518527	0.448568	-1.26462	-1.02024	-0.0557987	1.37356	1
ENSMUSG00000041642	1.45137	0.975224	-0.165946	-0.605353	-1.12637	-0.528927	2
ENSMUSG00000087230	1.05694	1.22472	0.102791	-1.34444	-0.62966	-0.410351	2
ENSMUSG00000041605	-0.89032	-0.15484	-0.162459	0.634343	-1.05318	1.62646	1
ENSMUSG00000097433	0.697433	-0.0527077	-0.481887	-1.37881	-0.297059	1.51303	1
ENSMUSG00000041570	0.57763	1.00147	0.87546	-0.261291	-0.636474	-1.55679	2
ENSMUSG00000097403	0.538013	1.14121	-1.31792	-0.0909905	0.766636	-1.03695	2
ENSMUSG00000026404	1.16376	0.901384	-0.279413	-0.878955	-1.33979	0.433016	2
ENSMUSG00000041498	0.878482	0.874635	0.381574	-0.103011	-0.22742	-1.80426	2
ENSMUSG00000101413	-0.555824	-0.70421	1.17955	-0.78153	1.38533	-0.523322	4
ENSMUSG00000104509	-1.23089	-1.01322	1.25776	0.852707	-0.198012	0.331656	4
ENSMUSG00000104366	-1.01395	-1.10536	1.19577	0.709122	0.737436	-0.523018	4
ENSMUSG00000097229	-1.17368	-1.16788	0.87934	0.820686	0.871209	-0.229668	3
ENSMUSG00000041483	-1.59132	-0.603751	1.2675	0.460627	0.529627	-0.0626797	4
ENSMUSG00000097113	-1.64106	0.498461	0.736612	0.697583	-0.848191	0.556597	4
ENSMUSG00000097448	0.323554	0.574756	1.37265	-0.443708	-0.275469	-1.55178	4
ENSMUSG00000104360	-1.30958	-1.04459	-0.14157	1.06339	0.808821	0.623535	3
ENSMUSG00000103953	-1.17282	-1.26054	0.713897	0.954203	0.78423	-0.0189681	3
ENSMUSG00000026398	-0.925317	-0.761904	0.616744	1.11155	0.966004	-1.00708	4
ENSMUSG00000026395	-0.377277	0.0337425	-0.563018	-0.53849	-0.543474	1.98852	1
ENSMUSG00000026393	0.99001	1.01193	0.268001	-0.964057	-1.40858	0.102702	2
ENSMUSG00000103152	1.34918	1.22706	-0.686985	-0.663748	-0.685499	-0.54001	2
ENSMUSG00000019230	-0.731256	0.0974113	1.64553	-0.0852445	-1.27303	0.346588	4
ENSMUSG00000079283	-0.0107696	-0.816019	-0.46845	-0.198726	-0.469385	1.96335	1
ENSMUSG00000056268	-0.536984	0.277096	-0.493972	-1.28064	0.433633	1.60087	1
ENSMUSG00000104436	-1.16531	-0.79949	-0.322006	0.107839	0.582717	1.59625	3
ENSMUSG00000102451	-0.681348	-0.0387649	-0.875597	-0.856491	1.34309	1.10911	1
ENSMUSG00000102243	-0.702908	0.156518	-0.918177	-0.902893	1.28552	1.08194	1
ENSMUSG00000063681	1.00638	1.25775	0.238949	-1.10882	-0.967987	-0.426271	2
ENSMUSG00000102661	1.34098	0.870791	0.400949	-0.895377	-0.915192	-0.802154	2
ENSMUSG00000033964	1.10958	0.723068	0.304915	-0.0209172	-0.382865	-1.73378	2
ENSMUSG00000033952	0.707739	1.62858	-0.0199719	-0.608611	-0.759371	-0.948362	2
ENSMUSG00000026368	1.28209	1.195	-0.550139	-0.150896	-0.774825	-1.00123	2
ENSMUSG00000033898	0.641035	0.231272	1.46731	-1.21868	-0.193602	-0.927331	2
ENSMUSG00000089991	-0.888504	-0.300915	1.94984	0.0193577	-0.472708	-0.307074	4
ENSMUSG00000104496	-1.37769	-1.07302	0.935939	0.746742	0.717227	0.0508009	3
ENSMUSG00000085867	-0.655124	0.364467	1.84325	-0.129873	-0.787094	-0.635627	4
ENSMUSG00000026365	-0.0033647	0.168374	0.49453	-1.50586	-0.601862	1.44818	1
ENSMUSG00000052726	0.281849	1.72557	-0.789758	-0.77637	-0.777035	0.335746	2
ENSMUSG00000102740	-0.994117	-1.04409	1.48399	0.324173	0.657167	-0.427127	4
ENSMUSG00000101795	-1.38522	-1.06633	0.214838	0.713287	1.09992	0.423506	3
ENSMUSG00000026361	-1.68873	-0.301444	0.261407	-0.175265	0.682185	1.22185	3
ENSMUSG00000033849	-0.817247	0.506773	-0.907716	-0.897458	0.735393	1.38026	1
ENSMUSG00000089640	-1.59852	-0.491554	0.979153	0.100946	1.10672	-0.0967437	3
ENSMUSG00000018196	-1.52421	-1.0152	0.606093	0.516249	0.644329	0.77274	3
ENSMUSG00000018199	-0.152223	1.57736	-0.195278	-1.45221	0.509292	-0.286947	2
ENSMUSG00000018189	-1.43956	-0.140658	-0.266475	-0.167459	0.382415	1.63174	1
ENSMUSG00000100455	-1.64523	-0.802942	0.691412	0.892736	0.421912	0.442112	3
ENSMUSG00000026360	1.25809	1.2003	-0.178425	-0.5637	-1.13573	-0.580533	2
ENSMUSG00000100441	-1.1509	-1.19389	0.71135	0.667948	1.12765	-0.162168	3
ENSMUSG00000026357	-0.462326	0.170112	1.95417	-0.619076	-0.597165	-0.445718	4
ENSMUSG00000090323	-0.830743	-1.1863	0.849755	-0.375923	1.42292	0.12029	3
ENSMUSG00000035131	1.16993	0.938908	0.291405	-1.03548	-1.2574	-0.107373	2
ENSMUSG00000080078	0.486392	-0.624835	0.393245	1.1897	0.215754	-1.66025	4
ENSMUSG00000056220	0.714611	-0.0704444	-1.52696	0.158589	1.32786	-0.603662	3
ENSMUSG00000032487	0.631501	-0.574799	0.157305	1.47383	-1.41378	-0.274059	4
ENSMUSG00000099875	-1.40944	-0.945933	0.610612	0.640376	1.15466	-0.0502756	3
ENSMUSG00000006010	-0.131741	0.450179	-1.85305	-0.0981947	0.774509	0.8583	1
ENSMUSG00000006005	-0.847824	-1.06516	0.93859	0.656703	1.10329	-0.785605	4
ENSMUSG00000006014	1.41958	0.979695	0.0412406	-0.904661	-0.655142	-0.880715	2
ENSMUSG00000101519	-0.996934	-1.05209	1.5197	0.538512	-0.391699	0.382514	4
ENSMUSG00000066842	-0.99066	0.212199	1.4719	-0.509938	-0.96645	0.782947	4
ENSMUSG00000114212	0.623826	1.54309	0.0533809	-0.395094	-1.36265	-0.462552	2
ENSMUSG00000114943	0.0905128	1.31254	0.967221	-0.717743	-1.30215	-0.350378	2
ENSMUSG00000114694	0.744565	1.3787	0.432114	-1.18529	-0.77049	-0.5996	2
ENSMUSG00000114582	1.11176	1.16866	0.253659	-1.15552	-0.844869	-0.533694	2
ENSMUSG00000114591	1.15857	1.05649	0.3376	-0.870433	-1.19816	-0.48407	2
ENSMUSG00000100954	-0.872057	-0.925116	-0.504507	0.863589	1.54042	-0.102329	3
ENSMUSG00000023150	-1.05927	-1.26976	-0.195233	0.798067	1.08756	0.638635	3
ENSMUSG00000052748	0.24485	0.565904	0.503027	0.455414	0.254334	-2.02353	4
ENSMUSG00000053286	0.748113	-1.0887	-1.43296	0.272648	0.728245	0.772657	1
ENSMUSG00000103928	-0.515681	-0.623038	0.39652	-0.643127	1.87915	-0.493821	3
ENSMUSG00000026484	0.866233	1.09447	0.208485	-0.856804	0.184344	-1.49673	2
ENSMUSG00000103238	-1.20634	-1.31071	0.700812	0.722543	0.875091	0.218606	3
ENSMUSG00000100981	-0.855955	-0.543077	1.59014	0.840546	-0.195503	-0.836146	4
ENSMUSG00000100551	-0.701549	-0.792275	1.78583	-0.231453	-0.593984	0.533429	4
ENSMUSG00000100357	-1.11855	0.502142	-1.23089	1.0082	0.973216	-0.134123	3
ENSMUSG00000026483	-0.450131	-0.237943	-1.04438	-0.656145	0.766038	1.62256	1
ENSMUSG00000100594	-0.918342	-0.258884	0.263621	1.71874	-1.01165	0.206514	4
ENSMUSG00000043019	-0.25479	-1.82153	1.09364	0.378977	0.520027	0.083684	3
ENSMUSG00000032666	1.04311	0.891311	-0.00663954	-1.6998	-0.431897	0.203918	2
ENSMUSG00000014980	-1.00026	-1.51425	0.605002	0.544712	0.445278	0.919518	3
ENSMUSG00000032649	0.541007	0.594127	1.18737	-0.103951	-1.59543	-0.623122	2
ENSMUSG00000026482	0.799603	0.766869	0.186612	-1.17038	-1.33972	0.757019	2
ENSMUSG00000086145	-0.0452853	1.69094	-0.225444	-0.95413	-0.964087	0.498003	2
ENSMUSG00000080950	-0.962506	-1.0549	0.970302	0.679943	1.04658	-0.679421	4
ENSMUSG00000055547	-0.394645	-0.081604	2.00571	-0.609502	-0.560126	-0.359836	4
ENSMUSG00000008475	-1.38997	-0.845244	0.13487	0.116999	0.570475	1.41287	3
ENSMUSG00000026480	-1.26209	-0.230224	-0.33948	-0.568823	1.33041	1.07021	3
ENSMUSG00000042772	-1.22949	-1.21414	0.67907	0.263965	1.17309	0.327504	3
ENSMUSG00000100394	-1.22072	-1.32677	0.347223	0.635058	0.76371	0.801501	3
ENSMUSG00000042751	1.04888	0.739767	0.147779	-0.595173	-1.68971	0.348459	2
ENSMUSG00000026479	1.48926	0.692826	-1.24795	-0.0513243	-0.861177	-0.0216401	2
ENSMUSG00000026478	0.442923	0.00616372	-0.326486	-1.50412	-0.169618	1.55114	1
ENSMUSG00000103818	-0.441657	-0.622552	-0.692605	-0.637004	0.61954	1.77428	1
ENSMUSG00000079138	-1.58938	0.0228304	0.430537	1.36088	0.340724	-0.565597	4
ENSMUSG00000042708	1.42104	0.890369	-0.192043	-0.395839	-0.357256	-1.36627	2
ENSMUSG00000042699	-1.58729	-0.886828	0.689126	0.348174	0.899661	0.537157	3
ENSMUSG00000042684	-1.457	-1.10154	0.560721	0.697759	0.743342	0.556716	3
ENSMUSG00000099858	-1.20972	-1.29403	0.400663	0.792559	0.982856	0.327674	3
ENSMUSG00000042671	-0.0998943	1.07052	0.580229	-1.18373	-1.1932	0.82607	1
ENSMUSG00000102404	0.259008	0.707189	1.52749	-0.891963	-0.903805	-0.697923	2
ENSMUSG00000100334	-0.445987	-0.568799	1.92182	-0.594233	-0.593519	0.280721	4
ENSMUSG00000026475	-0.75916	1.47898	0.379803	-0.890307	-0.903875	0.694561	1
ENSMUSG00000066800	-0.541856	-0.0171761	-0.758951	0.224238	-0.772534	1.86628	1
ENSMUSG00000042641	1.23415	1.07946	0.185191	-0.615638	-1.19176	-0.691399	2
ENSMUSG00000045968	-1.06031	-0.233918	1.764	0.434254	-0.688782	-0.215247	4
ENSMUSG00000026473	-1.33282	-1.17011	0.728602	0.764795	0.843198	0.166338	3
ENSMUSG00000100014	-0.855842	-0.936331	1.14774	0.370811	1.11113	-0.837504	4
ENSMUSG00000100627	0.691471	1.17411	0.30589	-0.692001	-1.59895	0.119484	2
ENSMUSG00000004110	1.27623	0.839985	-0.315923	-1.57647	-0.278569	0.054743	2
ENSMUSG00000056708	-0.672992	0.643625	1.73502	-0.259187	-0.791131	-0.655336	4
ENSMUSG00000026471	-0.479747	0.558076	-0.639591	-0.622092	-0.625318	1.80867	1
ENSMUSG00000026470	1.53214	0.753153	-0.0290396	-0.461687	-1.25857	-0.536	2
ENSMUSG00000033722	1.0191	1.21106	0.253179	-0.467134	-1.30805	-0.708151	2
ENSMUSG00000026469	-0.598442	-0.60174	0.278671	0.619616	1.52438	-1.22248	4
ENSMUSG00000073535	-1.10527	-0.439336	0.635874	0.941322	1.05478	-1.08737	4
ENSMUSG00000033701	0.283707	0.382052	-1.73557	-0.576571	0.631354	1.01503	1
ENSMUSG00000026468	-0.62716	0.401173	-1.00841	-0.968526	1.28086	0.922065	1
ENSMUSG00000033684	0.959384	0.487939	0.567303	0.35616	-1.72507	-0.645717	2
ENSMUSG00000033671	0.815702	0.958799	0.911652	-0.965984	-0.567159	-1.15301	2
ENSMUSG00000102833	-0.362642	-0.941393	1.37727	-0.272898	1.09758	-0.897914	4
ENSMUSG00000026466	-0.218037	-1.43503	0.979361	1.06061	0.412458	-0.799359	4
ENSMUSG00000102964	-0.984289	-0.72935	1.20911	0.788473	0.687266	-0.971211	4
ENSMUSG00000050565	-1.00347	-1.41962	0.244938	0.261669	0.878212	1.03827	3
ENSMUSG00000015484	-0.0405838	-0.805754	0.00362611	-0.828932	-0.228315	1.89996	1
ENSMUSG00000060985	0.910202	1.01233	-0.0995728	-0.198921	0.130983	-1.75502	2
ENSMUSG00000102372	-0.471396	-0.60232	1.92277	-0.676499	0.264024	-0.436578	4
ENSMUSG00000026602	-1.02345	-0.598121	0.581358	1.29704	0.749513	-1.00634	4
ENSMUSG00000026601	0.224516	0.408651	0.559113	0.467755	0.368593	-2.02863	4
ENSMUSG00000078193	-1.67853	-0.788276	0.493226	0.675817	0.746551	0.551208	3
ENSMUSG00000026600	0.568748	0.866436	-1.14529	-1.00742	-0.460322	1.17785	1
ENSMUSG00000103199	-0.235625	1.63899	-0.992641	-0.970567	0.575	-0.0151581	2
ENSMUSG00000101523	0.319208	0.0178054	1.09561	-0.543196	0.78142	-1.67085	4
ENSMUSG00000026596	0.670265	0.756966	0.843687	0.00892645	-0.562419	-1.71742	2
ENSMUSG00000104293	-0.492726	-0.649462	-0.689428	1.62617	-0.670119	0.875561	3
ENSMUSG00000060519	-1.57262	-0.853362	0.860506	0.922452	0.337598	0.305425	3
ENSMUSG00000033557	-1.33793	-1.22514	0.718241	0.669837	0.751986	0.423008	3
ENSMUSG00000026594	1.28593	0.98763	0.274573	-0.920857	-1.06221	-0.565066	2
ENSMUSG00000101964	1.25102	0.698099	-0.133281	-0.355132	0.201557	-1.66226	2
ENSMUSG00000033544	0.644188	1.35694	-0.318983	-1.62474	-0.0454782	-0.0119324	2
ENSMUSG00000103303	-0.803337	-0.944213	-0.502219	-0.158698	1.58196	0.826511	3
ENSMUSG00000102960	-0.485147	-0.642311	-0.698786	-0.679153	1.61602	0.889375	3
ENSMUSG00000101905	1.76908	0.0729585	0.0755675	-1.28856	-0.337836	-0.291202	2
ENSMUSG00000101768	0.95645	1.37037	0.110294	-0.445506	-1.07762	-0.913985	2
ENSMUSG00000026592	-0.190113	1.87951	0.219028	-0.78544	-0.822128	-0.300857	2
ENSMUSG00000070565	1.22761	0.544311	0.264119	-0.446128	0.117182	-1.7071	2
ENSMUSG00000102326	-1.19391	-0.924552	0.273889	-0.379752	0.996565	1.22776	3
ENSMUSG00000103808	-1.18892	-1.28772	0.59268	0.245567	0.523803	1.11459	3
ENSMUSG00000049881	-1.23665	-0.851642	-0.4954	0.433501	1.08939	1.0608	3
ENSMUSG00000033488	-1.51902	-1.01515	0.537457	0.627744	0.539394	0.829571	3
ENSMUSG00000087093	0.605597	1.59176	0.113924	-0.974077	-1.01767	-0.319527	2
ENSMUSG00000026589	1.04397	1.04789	0.118796	-0.473774	-0.138695	-1.59819	2
ENSMUSG00000004031	0.608752	1.51601	-0.429018	0.213044	-1.32852	-0.580268	2
ENSMUSG00000026587	1.26348	1.04043	0.213296	-0.972063	-1.03426	-0.510893	2
ENSMUSG00000073530	0.84839	1.13189	0.434196	-0.0454488	-1.15057	-1.21846	2
ENSMUSG00000047661	1.91549	-0.051354	-0.180611	-0.637467	-0.109418	-0.936641	2
ENSMUSG00000104014	-0.542739	0.0440761	0.996298	0.977154	0.175991	-1.65078	4
ENSMUSG00000061992	-0.942518	-1.00612	-0.106324	0.898061	1.47633	-0.319427	3
ENSMUSG00000040782	-0.00315312	0.658465	1.51353	-0.298856	-0.467076	-1.40291	4
ENSMUSG00000103572	-0.959339	-1.03751	0.831013	0.601754	1.22847	-0.664388	4
ENSMUSG00000103186	-0.811894	-0.994798	1.08079	0.293728	1.21695	-0.784771	4
ENSMUSG00000089536	-0.873888	-1.00069	0.969836	1.01525	0.73769	-0.848194	4
ENSMUSG00000090394	-0.685249	0.427945	-0.972811	-0.931875	1.3936	0.768391	1
ENSMUSG00000026725	1.45807	0.602138	0.0712484	0.101621	-1.15348	-1.0796	2
ENSMUSG00000058267	0.632379	-1.04167	-0.0172288	-0.747836	-0.477219	1.65158	1
ENSMUSG00000014226	-1.40902	-0.976596	0.28173	0.341794	0.485934	1.27616	3
ENSMUSG00000103006	-1.27662	-0.43237	1.44542	0.419102	-0.750941	0.595406	4
ENSMUSG00000026721	1.06929	1.16546	0.321459	-0.472372	-1.02404	-1.05981	2
ENSMUSG00000118401	1.37361	-0.0719445	-0.371708	-0.973442	-0.983574	1.02706	1
ENSMUSG00000103432	-0.329847	0.134233	-0.609994	-0.569314	-0.583713	1.95863	1
ENSMUSG00000104053	-0.715775	-0.861686	1.45338	-0.867076	0.0540883	0.937064	3
ENSMUSG00000040423	0.466839	0.0395228	0.479571	0.0987321	0.863462	-1.94813	4
ENSMUSG00000026715	0.873773	0.857129	0.354682	-0.0230342	-0.241191	-1.82136	2
ENSMUSG00000103222	1.24688	1.31981	-0.453868	-0.73619	-0.751059	-0.62557	2
ENSMUSG00000103680	-0.736039	-0.922573	1.20176	-1.00982	0.91718	0.54949	3
ENSMUSG00000043467	0.129639	1.25093	0.275964	0.259047	-0.109145	-1.80643	2
ENSMUSG00000053332	-1.15331	-1.3355	0.155171	0.683681	0.695329	0.954634	3
ENSMUSG00000026709	-1.66386	-0.630684	0.0362761	0.543391	0.674689	1.04019	3
ENSMUSG00000026708	-1.7184	-0.254156	1.23655	0.635856	0.198561	-0.0984096	4
ENSMUSG00000026705	0.585328	-1.09187	-0.89223	1.58917	-0.345757	0.155362	3
ENSMUSG00000044835	-1.15775	-1.06684	0.213704	-0.113572	0.741118	1.38334	3
ENSMUSG00000049160	-0.550373	0.0799252	-0.0696501	-0.691028	-0.697923	1.92905	1
ENSMUSG00000102817	-0.907543	1.03734	1.37885	-0.99038	-0.463973	-0.05429	4
ENSMUSG00000026701	-1.11645	-0.883025	-0.405767	0.0494704	1.05166	1.30411	3
ENSMUSG00000026700	1.36987	-0.618075	-0.664245	-0.652458	-0.643546	1.20846	1
ENSMUSG00000040323	1.72972	0.18935	-1.23999	-0.527345	0.19344	-0.345174	2
ENSMUSG00000102399	-0.317788	1.21528	1.26548	-0.650851	-0.399822	-1.1123	2
ENSMUSG00000040297	1.26444	0.974229	0.36514	-0.760873	-1.0657	-0.77724	2
ENSMUSG00000103158	1.08275	1.3222	0.0428075	-1.00659	-0.834375	-0.606799	2
ENSMUSG00000026698	0.123485	1.9566	-0.40657	-0.682702	-0.364595	-0.62622	2
ENSMUSG00000103393	0.886446	0.414541	-1.2428	-1.22743	0.192405	0.976838	1
ENSMUSG00000040265	0.896785	1.4038	0.220917	-1.02303	-0.689945	-0.808519	2
ENSMUSG00000078190	-0.7893	-0.287529	0.980834	-0.982186	-0.405995	1.48418	1
ENSMUSG00000026694	-1.56826	-0.9215	0.472728	0.933051	0.471829	0.61215	3
ENSMUSG00000026696	0.68661	1.32618	-0.298349	-1.19188	-1.01084	0.488281	2
ENSMUSG00000091743	1.03529	1.39492	-0.0201376	-0.665843	-0.965597	-0.778627	2
ENSMUSG00000026697	1.44269	1.12197	-0.687813	-0.644602	-0.693689	-0.538551	2
ENSMUSG00000091060	1.0251	1.22644	0.313649	-0.579053	-0.853462	-1.13267	2
ENSMUSG00000040225	1.07769	-0.346594	0.803124	-0.741574	0.654717	-1.44736	2
ENSMUSG00000026692	1.063	1.10198	0.338159	-0.709363	-1.36018	-0.433597	2
ENSMUSG00000040181	-0.511285	-0.0315519	0.0676594	-1.59732	1.16659	0.905903	1
ENSMUSG00000095576	1.02317	1.35128	-0.40941	0.00576324	-1.07891	-0.891889	2
ENSMUSG00000026691	1.09259	1.17927	0.344086	-0.891459	-0.950405	-0.774083	2
ENSMUSG00000026586	1.25637	0.519114	-0.538512	-1.02674	-1.05004	0.839808	2
ENSMUSG00000040124	-0.670972	-0.439326	-0.622588	-0.101995	-0.149184	1.98407	1
ENSMUSG00000102117	-0.87416	-1.21672	0.561372	0.920427	1.14348	-0.534399	3
ENSMUSG00000040113	0.909327	0.126839	-0.83694	-0.81618	-0.831721	1.44867	1
ENSMUSG00000026585	0.360508	-0.154782	-1.63926	-0.064608	0.0305693	1.46758	1
ENSMUSG00000026584	1.39856	0.606084	-1.53505	0.239223	-0.277355	-0.431463	2
ENSMUSG00000041406	-1.79184	-0.25284	-0.0838322	0.559208	1.07984	0.489471	3
ENSMUSG00000041396	-1.20731	1.47042	-1.05073	0.114015	0.201948	0.471657	1
ENSMUSG00000026582	2.03495	-0.424409	-0.470224	-0.434141	-0.452851	-0.253328	2
ENSMUSG00000026581	-0.891211	1.16316	0.125871	0.0636757	-1.39831	0.936812	1
ENSMUSG00000026580	1.25368	1.01817	0.276824	-1.14217	-0.806427	-0.600085	2
ENSMUSG00000090081	0.86167	1.63671	-0.670322	-0.657913	-0.662243	-0.507901	2
ENSMUSG00000026579	1.19358	1.06605	-0.363869	-1.03236	-1.09049	0.22709	2
ENSMUSG00000040918	-0.654956	-1.51993	-0.121771	0.942125	1.14687	0.207658	3
ENSMUSG00000026578	1.21794	1.14037	0.0756393	-0.590787	-1.20689	-0.636276	2
ENSMUSG00000026577	0.587045	1.38493	-1.64048	-0.167909	-0.033921	-0.129667	2
ENSMUSG00000026575	0.905636	0.638583	-0.56301	-1.36639	-0.677418	1.0626	1
ENSMUSG00000026576	0.17277	0.238945	-0.0835561	-1.12957	-0.885568	1.68698	1
ENSMUSG00000104011	-0.410664	0.745738	-0.698258	-0.663987	-0.673691	1.70086	1
ENSMUSG00000104117	1.38086	1.19216	-0.686654	-0.671407	-0.683805	-0.53115	2
ENSMUSG00000026572	0.997851	0.989734	0.604426	-0.335411	-1.14787	-1.10873	2
ENSMUSG00000089967	-0.868191	-0.395125	-0.37443	1.51306	0.971404	-0.846722	3
ENSMUSG00000040848	0.896014	1.01147	-0.372924	-1.02929	-1.21387	0.708598	2
ENSMUSG00000040843	-1.20555	-0.944372	1.42548	0.683774	0.298215	-0.257542	4
ENSMUSG00000102302	-1.18732	0.27861	1.6933	-0.0185616	0.0363016	-0.802327	4
ENSMUSG00000040836	-1.30189	-1.21995	0.641128	0.808194	0.834109	0.238411	3
ENSMUSG00000026571	1.39264	0.602175	0.211981	-0.230208	-0.41972	-1.55687	2
ENSMUSG00000026568	-1.21	-1.0903	0.499287	0.87513	1.13502	-0.209146	3
ENSMUSG00000103763	-1.21619	-0.240044	-0.11629	1.2921	1.07319	-0.79276	3
ENSMUSG00000026567	-0.85545	-0.320816	-0.215071	0.488079	1.76937	-0.866109	3
ENSMUSG00000026566	0.36603	1.84503	-0.235738	-0.920297	-0.565163	-0.489861	2
ENSMUSG00000040723	0.933026	1.25862	-0.0818601	-0.402459	-0.175723	-1.5316	2
ENSMUSG00000040713	-1.0675	-0.737105	-0.598836	0.298903	0.480158	1.62438	3
ENSMUSG00000005763	1.80719	-0.77666	-0.176153	-0.801458	-0.504008	0.451091	2
ENSMUSG00000026565	1.51264	0.687777	-0.841784	-1.0491	-0.59167	0.282142	2
ENSMUSG00000102890	-0.46135	-0.584413	1.96931	0.116058	-0.602142	-0.437467	4
ENSMUSG00000026564	-0.688771	0.0536059	-0.352787	-0.872471	-0.0461252	1.90655	1
ENSMUSG00000000544	0.70743	0.296599	-0.165347	-1.19803	-1.02124	1.38059	1
ENSMUSG00000040629	-0.468038	1.31283	0.734573	-0.447135	0.349552	-1.48179	4
ENSMUSG00000103400	-0.762802	-1.20583	0.966595	-0.192622	1.39705	-0.202391	3
ENSMUSG00000026563	1.4568	0.970877	-0.906305	-0.868727	-0.0560665	-0.59658	2
ENSMUSG00000040596	1.25454	-0.151457	0.200642	-0.786175	0.883792	-1.40134	2
ENSMUSG00000104194	-0.404032	2.01152	-0.573343	-0.0997306	-0.554689	-0.379726	2
ENSMUSG00000086056	-0.0325764	1.73577	0.538973	-0.788518	-0.819729	-0.633915	2
ENSMUSG00000051081	-0.332645	-0.317443	1.86354	-0.759605	-0.790751	0.336903	4
ENSMUSG00000086925	-1.08014	-0.257104	-1.08906	0.76016	1.38773	0.278419	3
ENSMUSG00000060568	-0.345347	-0.493951	-0.140347	-0.518142	-0.521323	2.01911	1
ENSMUSG00000026558	-1.84045	-0.347245	0.787627	0.808982	0.149466	0.441618	3
ENSMUSG00000103139	-1.12902	-1.20556	0.282838	0.784343	1.25563	0.0117722	3
ENSMUSG00000052428	-1.29955	-1.10562	0.0911703	0.51211	0.588867	1.21303	3
ENSMUSG00000088246	-1.72109	-0.492887	0.818621	0.951311	0.468176	-0.0241296	3
ENSMUSG00000026687	1.25668	1.11293	-0.327392	-0.642467	-1.28407	-0.115681	2
ENSMUSG00000026688	1.38419	0.93447	-0.141587	-0.789887	-1.24344	-0.143742	2
ENSMUSG00000015843	-0.57217	0.202484	-0.086023	-0.687888	-0.750534	1.89413	1
ENSMUSG00000026686	-0.0506009	0.224423	1.26305	0.726627	-0.590111	-1.57339	4
ENSMUSG00000026683	1.13001	1.41415	-0.375659	-0.791636	-0.626972	-0.749897	2
ENSMUSG00000026675	1.14753	1.27969	-0.215404	-0.688019	-1.189	-0.334786	2
ENSMUSG00000097503	-0.107292	1.19146	-0.881372	-0.0274114	-1.26582	1.09043	1
ENSMUSG00000026674	0.473044	-0.128159	0.64485	-0.549672	-1.62449	1.18443	1
ENSMUSG00000026670	-0.977069	-1.4334	0.251256	0.70774	1.15776	0.293707	3
ENSMUSG00000026667	-0.00963925	0.244677	0.759199	0.463809	0.51307	-1.97112	4
ENSMUSG00000102752	1.27548	0.864239	0.305637	-0.251238	-1.27404	-0.920073	2
ENSMUSG00000038473	1.30528	0.972178	0.141893	-0.314748	-1.14512	-0.959485	2
ENSMUSG00000102193	-1.1238	-0.716014	-0.307388	0.770292	1.5797	-0.202792	3
ENSMUSG00000038463	0.392237	1.35316	-1.05021	-1.03388	-0.45751	0.796205	1
ENSMUSG00000026663	1.48833	0.658596	-1.38182	-0.620068	0.0803079	-0.225348	2
ENSMUSG00000053925	-0.954406	-1.00894	-0.103115	0.456049	1.6872	-0.0767891	3
ENSMUSG00000026659	0.589746	1.41543	-1.29764	-0.834663	0.424222	-0.297101	2
ENSMUSG00000089838	-1.03881	-1.13682	-0.485612	0.744403	0.931819	0.985022	3
ENSMUSG00000026656	-1.47836	-1.064	0.648679	0.479899	0.580668	0.833118	3
ENSMUSG00000104340	-0.798929	-0.914879	0.820341	-0.9317	1.31137	0.513792	3
ENSMUSG00000059089	0.634284	1.55382	0.307093	-0.861089	-0.895812	-0.738293	2
ENSMUSG00000059498	-1.50381	-0.968215	0.789253	0.71982	0.794857	0.168094	3
ENSMUSG00000026649	-0.926681	-1.03192	1.48901	0.41021	-0.557339	0.616726	4
ENSMUSG00000058076	0.28604	0.791115	-1.09728	-0.793524	-0.624579	1.43823	1
ENSMUSG00000038370	-1.22958	-0.440435	1.55981	0.751595	-0.107885	-0.533506	4
ENSMUSG00000005674	-0.494172	-0.599235	-0.0106114	-0.21729	-0.657765	1.97907	1
ENSMUSG00000005681	-0.476885	-0.664844	1.11605	-0.687502	-0.729233	1.44242	1
ENSMUSG00000058715	-0.677523	-0.866114	1.58719	0.218529	-0.902254	0.640173	4
ENSMUSG00000013593	-1.34283	0.174568	-0.111112	-0.184191	-0.280408	1.74397	1
ENSMUSG00000006403	1.32504	0.941945	0.0314354	-0.223464	-0.760567	-1.31439	2
ENSMUSG00000052423	-0.797724	-1.5978	0.246616	0.875954	0.930018	0.34294	3
ENSMUSG00000062729	0.00142341	1.02043	-0.286742	-1.51115	-0.415662	1.1917	1
ENSMUSG00000053483	1.64269	0.728936	-0.197425	-0.491459	-1.03361	-0.649127	2
ENSMUSG00000062963	-1.65952	-0.675921	0.0360377	0.641149	0.798537	0.859713	3
ENSMUSG00000079137	-1.15402	-1.2561	0.368899	0.848063	1.10811	0.0850474	3
ENSMUSG00000103983	-1.55754	-0.794643	0.810693	-0.0500492	0.705289	0.886252	3
ENSMUSG00000013973	1.16174	1.17939	-0.7829	-0.150107	-0.141691	-1.26643	2
ENSMUSG00000013997	-1.71647	-0.446675	0.383988	0.21586	0.313557	1.24974	3
ENSMUSG00000006412	-1.47134	-0.795067	0.164586	1.29405	0.699787	0.107987	3
ENSMUSG00000045259	-1.09994	-0.752839	0.0985119	0.31628	-0.300743	1.73873	1
ENSMUSG00000006411	-1.18977	-0.514611	-0.286448	0.461551	-0.198477	1.72776	1
ENSMUSG00000048865	-1.22927	-1.33764	0.525655	0.531525	0.778437	0.7313	3
ENSMUSG00000026641	-1.4347	-0.598875	0.367509	0.951533	1.15952	-0.444997	3
ENSMUSG00000103711	-1.60458	-0.55221	0.856641	0.754534	0.850901	-0.305285	3
ENSMUSG00000038235	-1.1401	-1.37032	0.371049	0.846128	0.904058	0.389185	3
ENSMUSG00000091993	0.264595	1.21517	-1.37187	-0.91043	-0.0572088	0.859744	1
ENSMUSG00000060244	-0.991412	-1.36002	1.16764	0.848177	0.048782	0.286835	3
ENSMUSG00000038218	-0.658919	-0.750422	1.62243	-0.757874	0.841455	-0.296664	4
ENSMUSG00000038209	-1.28669	-0.750152	0.728224	0.985022	0.945624	-0.62203	4
ENSMUSG00000004709	1.00548	1.21664	0.0374655	-0.77347	-1.37744	-0.108676	2
ENSMUSG00000038179	0.716043	0.265978	1.15504	-0.798213	0.210637	-1.54949	2
ENSMUSG00000103219	1.78029	0.600315	-0.456091	-0.767868	-0.53556	-0.621081	2
ENSMUSG00000103083	-0.409921	-0.536762	-0.571565	-0.109929	2.01401	-0.385829	3
ENSMUSG00000103137	-0.668689	-0.778307	-0.350468	0.770723	1.67594	-0.649202	3
ENSMUSG00000015355	1.52492	0.919839	-0.240035	-0.86749	-0.917882	-0.419351	2
ENSMUSG00000103883	-1.04175	-1.08756	0.850584	-0.522798	1.13785	0.663674	3
ENSMUSG00000059058	-1.53937	-1.00166	0.656756	0.707561	0.625366	0.551342	3
ENSMUSG00000015316	1.06048	1.16795	0.35097	-0.551049	-1.13107	-0.897286	2
ENSMUSG00000015314	-0.363501	-0.0273316	-0.553191	-0.491079	-0.56506	2.00016	1
ENSMUSG00000026556	-0.50386	0.483286	-0.147934	-0.958865	-0.647877	1.77525	1
ENSMUSG00000003458	1.58663	0.377943	-1.39662	-0.495295	-0.302091	0.229426	2
ENSMUSG00000026553	1.37758	0.522501	-1.56184	-0.350664	-0.359091	0.371509	2
ENSMUSG00000003464	-1.25781	0.28594	-0.328717	1.25795	0.928172	-0.885527	3
ENSMUSG00000089803	-1.10103	-1.20777	0.157451	0.828078	1.27115	0.0521219	3
ENSMUSG00000026554	1.3308	1.15301	-0.233641	-0.476004	-1.03629	-0.737883	2
ENSMUSG00000013698	-1.39494	-1.16419	0.524708	0.767332	0.759915	0.507173	3
ENSMUSG00000007122	-0.471891	0.50133	1.1531	-1.72798	0.448362	0.097076	1
ENSMUSG00000007107	-0.490071	-0.630853	-0.721635	-0.709414	1.47791	1.07406	1
ENSMUSG00000038034	0.520198	0.8888	-1.79006	-0.362565	-0.0326528	0.776277	1
ENSMUSG00000044708	-0.690889	0.646985	1.66889	-0.80645	-0.817629	-0.000909719	4
ENSMUSG00000050229	1.56002	-0.424562	0.161863	0.398289	-0.22985	-1.46575	2
ENSMUSG00000103357	-0.968548	1.64709	-0.687025	-0.576949	0.724444	-0.139011	1
ENSMUSG00000026548	0.242595	0.404876	-1.42588	-1.03591	1.01917	0.795147	1
ENSMUSG00000037995	-0.533409	-1.45792	-0.535389	0.510892	0.935449	1.08038	3
ENSMUSG00000026547	-1.42702	-0.66579	-0.0954376	-0.0181264	0.907155	1.29922	3
ENSMUSG00000026546	0.975187	1.18108	0.150163	-1.52478	-0.414023	-0.367633	2
ENSMUSG00000053318	-0.738396	-0.117631	-0.910733	1.19737	1.28861	-0.719223	3
ENSMUSG00000026544	1.24596	0.943362	0.352815	-0.660647	-1.27744	-0.604044	2
ENSMUSG00000060128	-1.69628	-0.614912	0.229405	0.706496	1.03909	0.33621	3
ENSMUSG00000037860	-0.534778	-0.67073	-0.767572	-0.337048	0.486849	1.82328	1
ENSMUSG00000073491	0.70335	1.53286	-0.394795	-0.98678	-1.00214	0.147513	2
ENSMUSG00000066677	1.17628	1.26032	-0.00120677	-0.908047	-0.899713	-0.627633	2
ENSMUSG00000090272	-0.312155	-0.396162	-0.456003	-0.408901	-0.464982	2.0382	1
ENSMUSG00000046486	1.35741	0.309374	-1.10915	-0.204841	-1.10573	0.752933	2
ENSMUSG00000051528	1.35207	1.21248	-0.727324	-0.69943	-0.70366	-0.434132	2
ENSMUSG00000091950	-0.61078	1.92222	0.0528101	-0.011904	-0.761874	-0.590468	2
ENSMUSG00000055033	0.330397	1.24793	0.0274242	-1.16976	-1.18479	0.748795	2
ENSMUSG00000026532	0.535853	1.34068	-0.491108	-1.03245	-1.05569	0.702717	2
ENSMUSG00000028354	1.03731	1.06136	0.503319	-0.607115	-1.30226	-0.692614	2
ENSMUSG00000026527	0.176479	1.54513	-0.834463	-0.802437	-0.828995	0.744288	1
ENSMUSG00000103079	1.28955	1.22966	-0.221855	-0.788308	-0.843298	-0.665743	2
ENSMUSG00000026526	0.537774	0.59178	-1.07187	-0.734722	-0.766629	1.44366	1
ENSMUSG00000026525	1.3878	1.10597	-0.224607	-0.627797	-0.648578	-0.992784	2
ENSMUSG00000078185	0.317538	0.832031	0.60352	0.349605	-0.182504	-1.92019	2
ENSMUSG00000026523	-1.16233	-1.16681	1.3032	0.592487	0.485267	-0.0518231	4
ENSMUSG00000039748	1.2951	1.22918	-1.00985	-0.453801	-0.421585	-0.63904	2
ENSMUSG00000104158	-0.819116	-0.915891	0.607544	1.11028	0.980245	-0.96306	4
ENSMUSG00000055214	0.962775	1.09053	0.605278	-0.690257	-1.21202	-0.75631	2
ENSMUSG00000078184	-1.41452	-0.755586	1.41751	0.480923	0.410318	-0.13865	4
ENSMUSG00000104021	1.89689	0.0377325	0.0950363	-0.727285	-0.73579	-0.566585	2
ENSMUSG00000057335	0.768971	1.23063	-0.156361	-0.0505691	-0.102489	-1.69018	2
ENSMUSG00000104154	-1.20952	-1.34762	0.764563	0.755414	0.400432	0.636732	3
ENSMUSG00000103435	0.158233	1.62348	0.38133	-0.960951	-0.0776451	-1.12445	2
ENSMUSG00000026504	-0.957284	0.0499491	-0.86876	-0.357267	1.74606	0.387302	3
ENSMUSG00000103367	0.334525	1.50982	-0.715288	-0.0215604	0.307397	-1.4149	2
ENSMUSG00000102211	-0.456707	-0.587453	-0.671071	0.192991	1.94436	-0.422123	3
ENSMUSG00000019699	0.821024	0.891	0.853065	-0.303087	-0.853399	-1.4086	2
ENSMUSG00000063659	0.61345	0.885448	0.990186	-0.291967	-0.674128	-1.52299	2
ENSMUSG00000102885	-0.764424	-0.970797	0.432561	1.60932	0.416402	-0.723058	4
ENSMUSG00000015961	0.467341	1.65674	-0.564448	-0.998003	-0.812082	0.250457	2
ENSMUSG00000089657	-0.837787	0.222757	1.85157	-0.0221847	-0.404241	-0.810113	4
ENSMUSG00000102483	0.0498438	1.86553	-0.0664975	-0.130285	-0.957115	-0.761476	2
ENSMUSG00000091476	0.994192	0.778195	0.648164	0.0166008	-1.30732	-1.12983	2
ENSMUSG00000102493	-1.56087	-0.583801	0.228208	0.510618	1.38183	0.0240174	3
ENSMUSG00000026502	1.02165	0.793464	0.811718	-0.386246	-1.18531	-1.05528	2
ENSMUSG00000103958	-1.6182	-0.687785	0.300659	0.860371	1.03199	0.112962	3
ENSMUSG00000104126	-1.46416	-0.754265	0.561696	0.938527	1.0045	-0.28629	3
ENSMUSG00000086350	-1.36691	-0.649844	-0.560516	0.688858	1.2064	0.682021	3
ENSMUSG00000026500	-0.517053	-1.12059	0.76466	-0.29497	-0.446358	1.61431	1
ENSMUSG00000039630	-0.670228	0.455181	-1.22233	1.65994	0.0749055	-0.297467	3
ENSMUSG00000026495	0.869373	0.390619	-0.817358	-1.27662	-0.4333	1.26729	1
ENSMUSG00000026494	1.15333	0.814239	0.597683	-0.427464	-0.767357	-1.37043	2
ENSMUSG00000055067	1.25612	1.14861	-0.137968	-0.883166	-1.10814	-0.275458	2
ENSMUSG00000096474	-1.40357	-1.06751	0.123401	0.727799	0.939341	0.680539	3
ENSMUSG00000026492	-0.321393	-0.636551	0.952341	0.957623	0.576212	-1.52823	4
ENSMUSG00000082395	-1.17295	-1.23678	0.0832278	0.345993	0.932271	1.04824	3
ENSMUSG00000038949	0.842119	1.29557	0.133309	-0.13631	-0.681637	-1.45305	2
ENSMUSG00000038936	-0.924162	-0.689414	0.177633	-0.352917	-0.0839669	1.87283	1
ENSMUSG00000087236	0.342386	0.692566	1.26119	0.0289093	-0.92931	-1.39574	2
ENSMUSG00000026491	0.547242	-0.580366	0.874911	0.535031	0.398827	-1.77564	4
ENSMUSG00000073486	1.50362	0.400642	0.201955	0.0652844	-0.789203	-1.38229	2
ENSMUSG00000104418	-1.18204	-1.2776	0.363538	0.904735	0.989473	0.201893	3
ENSMUSG00000026490	1.23871	1.1802	0.0711463	-0.831626	-0.808052	-0.850371	2
ENSMUSG00000026489	-0.780374	-0.835697	0.184226	1.85224	0.0539276	-0.474324	4
ENSMUSG00000010609	1.45603	1.0485	-0.828503	-0.246672	-0.637813	-0.791546	2
ENSMUSG00000038855	-0.967753	0.185154	0.277569	-1.19481	0.115123	1.58471	1
ENSMUSG00000104388	-0.716822	1.56639	0.123583	-0.852558	-0.861291	0.740694	1
ENSMUSG00000102608	1.71749	0.728041	-0.667956	-0.650703	-0.651934	-0.474943	2
ENSMUSG00000026496	-0.821509	-1.25154	-0.529065	0.49312	0.977803	1.13119	3
ENSMUSG00000058729	-1.41933	-0.663827	1.31891	0.309503	0.777884	-0.323146	4
ENSMUSG00000026497	-1.29043	-0.649451	0.537942	1.05538	1.02468	-0.67812	3
ENSMUSG00000026499	0.904729	1.38121	0.17782	-0.728197	-0.547044	-1.18852	2
ENSMUSG00000103649	1.25396	-0.451392	-1.12958	0.0331805	1.12252	-0.82869	2
ENSMUSG00000103156	-0.447823	-0.570771	1.98602	-0.590129	0.0458324	-0.423131	4
ENSMUSG00000060743	-1.98978	0.240539	0.287669	0.533416	0.768132	0.160023	3
ENSMUSG00000073485	-0.954953	0.278	1.76737	-0.0374475	-0.119428	-0.933545	4
ENSMUSG00000038806	-1.25449	-1.24975	0.59098	1.02619	0.628758	0.258312	3
ENSMUSG00000103979	-1.12114	-0.764097	1.19164	0.0992737	1.17828	-0.58395	4
ENSMUSG00000066652	-0.134521	0.00965074	-0.823689	-0.768306	-0.199688	1.91655	1
ENSMUSG00000026520	0.447167	0.0914419	-0.985069	-0.862475	-0.399289	1.70822	1
ENSMUSG00000038793	-0.644347	-0.749114	-0.816904	-0.0708553	0.528522	1.7527	1
ENSMUSG00000026519	-0.730332	-1.38775	-0.392301	0.402445	1.09391	1.01403	3
ENSMUSG00000038776	-0.580956	-0.504814	-1.14546	-0.231029	1.15757	1.30469	1
ENSMUSG00000038768	1.0554	1.14951	0.421155	-0.633268	-1.01586	-0.976935	2
ENSMUSG00000103328	1.67744	-0.147382	-1.09985	-0.0484432	0.472291	-0.854057	2
ENSMUSG00000102219	-0.772849	-0.148786	0.336639	-0.564994	-0.706954	1.85694	1
ENSMUSG00000026516	-1.41546	-0.630371	0.069052	0.901202	1.31359	-0.238006	3
ENSMUSG00000062169	-1.23577	-1.33815	0.526907	0.707048	0.728793	0.611174	3
ENSMUSG00000038733	0.306171	0.387542	1.28483	-0.0634602	-0.161454	-1.75362	4
ENSMUSG00000054135	-1.0242	-1.12079	1.19583	0.495807	0.90353	-0.450179	4
ENSMUSG00000081214	-1.41936	-1.0857	0.22223	0.64533	0.826454	0.811049	3
ENSMUSG00000103260	-1.26773	-1.26834	0.443651	0.825196	0.861075	0.406145	3
ENSMUSG00000026514	-0.614228	0.394761	1.83756	-0.840095	-0.186703	-0.591298	4
ENSMUSG00000047369	1.13377	1.02365	0.445476	-1.16388	-0.521684	-0.917331	2
ENSMUSG00000004880	0.706541	-1.74705	-0.122211	0.674682	0.89953	-0.411489	3
ENSMUSG00000022995	0.368156	1.11193	-0.606928	-1.68233	0.178659	0.630513	1
ENSMUSG00000103722	-1.09582	-1.18708	-0.30232	0.897989	1.02918	0.658053	3
ENSMUSG00000103317	-1.07659	-1.18077	-0.0229286	0.076979	1.021	1.18231	3
ENSMUSG00000102950	-1.08167	-1.18626	-0.10835	0.250406	1.27351	0.852363	3
ENSMUSG00000102760	-1.16394	-1.21418	-0.0374302	0.48238	1.15143	0.781739	3
ENSMUSG00000026511	-1.38255	-0.662675	-0.23367	0.693417	1.44738	0.138096	3
ENSMUSG00000038633	1.44836	1.00026	-0.488944	-1.13217	-0.552458	-0.275053	2
ENSMUSG00000100147	1.20668	0.839502	-1.17552	-1.16109	-0.0378369	0.328264	2
ENSMUSG00000047539	1.00362	1.18727	0.467294	-0.833933	-0.963988	-0.860264	2
ENSMUSG00000026510	-1.4244	-1.03524	0.758406	0.214198	0.449716	1.03733	3
ENSMUSG00000026509	-0.756032	-0.951437	0.226381	0.340149	-0.592578	1.73352	1
ENSMUSG00000038599	-0.76516	0.290449	1.70072	0.37888	-0.858769	-0.746119	4
ENSMUSG00000104376	1.36389	0.962385	0.000622226	-0.265913	-1.12822	-0.932759	2
ENSMUSG00000038576	1.19662	0.484422	0.978567	-0.909763	-0.967621	-0.782228	2
ENSMUSG00000079164	1.0798	1.33697	0.0354994	-0.75632	-0.980541	-0.715405	2
ENSMUSG00000030768	1.52626	0.759193	-0.272662	-0.800084	-1.17395	-0.0387547	2
ENSMUSG00000102478	-1.33816	-1.10623	0.399157	0.858561	1.03211	0.154563	3
ENSMUSG00000118599	1.29579	1.17563	-0.070424	-0.827408	-0.861525	-0.712062	2
ENSMUSG00000046836	1.23493	1.34252	-0.586651	-0.615958	-0.642986	-0.731851	2
ENSMUSG00000042901	0.640873	0.902229	0.833973	0.0923525	-1.12938	-1.34005	2
ENSMUSG00000056050	1.55633	0.869449	-1.01748	-0.456617	-0.225548	-0.726132	2
ENSMUSG00000103415	-0.42977	1.95435	0.151036	-0.63639	-0.637959	-0.401267	2
ENSMUSG00000072258	0.685269	1.20594	-0.345711	0.122442	0.0465415	-1.71448	2
ENSMUSG00000053461	0.203609	1.39117	-0.210032	-0.456507	0.617518	-1.54576	2
ENSMUSG00000104022	-0.690205	-0.0377704	0.769649	-0.994587	1.59149	-0.638578	4
ENSMUSG00000103451	0.86468	0.905681	0.959452	-0.808108	-0.883355	-1.03835	2
ENSMUSG00000103305	1.4313	1.08943	-0.283802	-0.790274	-0.804128	-0.642522	2
ENSMUSG00000102743	-0.645925	1.55947	0.213358	-0.939805	-0.86962	0.682521	1
ENSMUSG00000039384	-1.08116	0.994807	0.231104	0.974505	0.218838	-1.33809	4
ENSMUSG00000044854	1.02494	0.883143	-0.198696	-1.15507	-1.18332	0.629003	2
ENSMUSG00000101574	1.15937	1.37133	-0.281324	-0.782803	-0.79643	-0.670143	2
ENSMUSG00000103314	-0.537445	-0.70041	-0.807459	1.05581	1.48579	-0.496282	3
ENSMUSG00000026621	-0.643642	-0.780989	1.78501	-0.798655	0.0523765	0.385896	4
ENSMUSG00000073481	1.24631	-0.123971	0.205518	0.448345	0.00930448	-1.7855	2
ENSMUSG00000039349	-0.75209	-1.02378	0.703415	0.978274	1.02943	-0.935255	4
ENSMUSG00000026620	-0.675418	-1.32843	0.829615	1.156	0.623246	-0.605017	4
ENSMUSG00000039318	1.40845	1.11923	-0.421984	-0.949684	-0.665784	-0.490237	2
ENSMUSG00000103613	0.884332	1.20341	0.583315	-1.0187	-0.710829	-0.941529	2
ENSMUSG00000026618	-0.301769	-1.03897	-0.545017	0.183112	-0.160948	1.8636	1
ENSMUSG00000026617	-1.39686	-0.252227	-0.741951	0.402534	0.609835	1.37867	3
ENSMUSG00000097261	-1.561	0.560303	0.677742	-0.529816	1.18325	-0.330473	4
ENSMUSG00000026615	1.18812	0.0926717	-1.45672	-0.557707	-0.29561	1.02924	1
ENSMUSG00000051295	-0.131904	-0.485524	1.82835	-0.594051	0.347621	-0.964496	4
ENSMUSG00000026614	-0.590554	1.38496	-0.74672	-0.736515	-0.491004	1.17983	1
ENSMUSG00000103799	0.622787	1.59745	0.129425	-0.934097	-0.998552	-0.417011	2
ENSMUSG00000102546	-0.090759	-0.413381	1.07898	-0.614111	-1.26075	1.30003	1
ENSMUSG00000039246	1.0654	1.31242	0.116373	-0.641172	-0.948955	-0.904061	2
ENSMUSG00000039239	1.054	1.08762	0.450326	-0.445141	-1.09367	-1.05313	2
ENSMUSG00000001305	-1.48112	-0.997767	0.497226	0.7948	0.930698	0.256158	3
ENSMUSG00000097784	-0.849855	-0.868143	1.33803	0.408577	0.870687	-0.899292	4
ENSMUSG00000039224	-0.696572	-0.740959	1.22203	1.16196	0.107445	-1.0539	4
ENSMUSG00000026611	0.863296	1.33601	-1.33074	-0.42239	-0.681889	0.235711	2
ENSMUSG00000107163	-0.209038	-0.432256	-0.483839	-0.4431	-0.462749	2.03098	1
ENSMUSG00000039210	1.34512	0.916768	0.054518	-0.16578	-1.0156	-1.13503	2
ENSMUSG00000104394	0.0706797	0.293356	1.05793	0.281404	0.211282	-1.91465	4
ENSMUSG00000104245	-0.400801	-0.593845	-0.686878	-0.62842	0.465018	1.84493	1
ENSMUSG00000026610	0.797122	0.97462	0.561376	-0.0606766	-0.629321	-1.64312	2
ENSMUSG00000104482	0.915591	1.59109	-0.448936	-0.789993	-0.61291	-0.654846	2
ENSMUSG00000026609	1.04162	1.16393	0.360643	-0.473356	-1.13636	-0.956475	2
ENSMUSG00000026608	0.5042	0.793614	1.08298	-0.0526882	-0.824708	-1.5034	2
ENSMUSG00000037624	1.50399	0.152216	0.814786	-0.853794	-0.893295	-0.723901	2
ENSMUSG00000102824	-1.87792	-0.0118216	-0.146199	0.48496	0.859034	0.691944	3
ENSMUSG00000026605	1.15522	1.08411	0.33882	-0.571974	-1.13703	-0.869135	2
ENSMUSG00000103374	0.0847689	-0.652838	1.95425	-0.219397	-0.680076	-0.486707	4
ENSMUSG00000026604	0.945061	0.507084	0.158062	-0.988519	-1.46287	0.841182	2
ENSMUSG00000104435	-0.216144	-0.474521	-0.584697	-0.557648	2.01088	-0.177868	3
ENSMUSG00000026603	0.394054	-0.18543	-1.75579	-0.0974856	0.394762	1.24989	1
ENSMUSG00000010175	0.845478	1.44615	-0.523624	-0.962291	-0.981238	0.175527	2
ENSMUSG00000099404	1.86847	0.417405	-0.637166	-0.627474	-0.592509	-0.428731	2
ENSMUSG00000103510	0.873434	1.38889	0.281242	-0.652289	-1.0324	-0.858882	2
ENSMUSG00000089872	0.614927	0.679187	-1.91141	-0.0282123	-0.06322	0.708727	1
ENSMUSG00000026634	1.11123	0.986632	0.426631	-0.47099	-1.40055	-0.652951	2
ENSMUSG00000037568	-1.40076	0.0921398	1.08929	-0.579995	-0.370714	1.17005	1
ENSMUSG00000103964	-0.409898	-0.532116	2.0194	-0.145059	-0.553363	-0.378962	4
ENSMUSG00000066595	-1.48272	-1.02473	0.972898	0.499047	0.418346	0.617157	3
ENSMUSG00000097845	-1.68368	-0.440959	1.1129	0.540417	0.641327	-0.170006	4
ENSMUSG00000057072	-0.0109482	-0.883143	0.522856	0.344164	1.39696	-1.36989	4
ENSMUSG00000026632	-1.7999	-0.516492	0.378178	0.743668	0.392226	0.802315	3
ENSMUSG00000062510	-1.33696	-1.17328	0.282897	0.944328	0.784872	0.498142	3
ENSMUSG00000026630	0.861135	1.50413	-0.0387737	-0.613087	-0.582141	-1.13127	2
ENSMUSG00000102777	-0.767775	-0.369199	-0.917455	-0.208369	0.487604	1.77519	1
ENSMUSG00000026628	-0.678128	1.03535	-0.159457	-0.794503	-0.849125	1.44586	1
ENSMUSG00000073478	-0.93717	0.0291261	-0.866047	-0.00782343	1.83519	-0.0532769	3
ENSMUSG00000037499	-1.16928	0.282654	-1.31806	0.394678	0.800634	1.00937	1
ENSMUSG00000026627	-0.507227	0.916664	0.58724	-1.73409	-0.00453503	0.741953	1
ENSMUSG00000026626	1.09672	1.12375	0.316475	-1.28289	-0.659381	-0.594673	2
ENSMUSG00000104341	-0.614711	-0.00155219	-0.792277	0.0910267	1.9074	-0.589886	3
ENSMUSG00000037474	-0.183502	0.402221	-1.3257	1.07325	0.990171	-0.95644	3
ENSMUSG00000037461	-1.35783	-1.18422	0.328757	0.740287	0.816888	0.656124	3
ENSMUSG00000026623	1.23756	0.73046	0.173524	-0.864945	0.180774	-1.45738	2
ENSMUSG00000102840	1.14022	0.631132	-0.0427959	0.0419121	0.0450036	-1.81548	2
ENSMUSG00000026622	-1.60514	0.526975	0.443238	1.11792	0.298407	-0.781398	4
ENSMUSG00000055833	-0.836118	-0.835806	1.04181	0.889435	0.790187	-1.04951	4
ENSMUSG00000037434	0.117374	-0.430146	1.9212	-0.930827	-0.254547	-0.42305	4
ENSMUSG00000049353	-0.486179	-1.16006	1.6689	0.597167	-0.514804	-0.105025	4
ENSMUSG00000097416	-0.493223	-1.32283	1.19859	0.968834	0.3581	-0.709469	4
ENSMUSG00000026637	0.596362	1.72118	-0.401796	-0.570647	-1.05344	-0.291657	2
ENSMUSG00000103653	-0.958683	-0.385856	-0.798327	0.0138714	0.347485	1.78151	1
ENSMUSG00000037395	1.1754	0.532982	-1.44232	-0.935736	0.612561	0.0571103	2
ENSMUSG00000097316	0.877741	1.07874	0.764818	-0.930809	-0.971496	-0.818989	2
ENSMUSG00000058248	1.13617	0.799671	0.458147	-0.144236	-0.732278	-1.51747	2
ENSMUSG00000037375	1.27546	1.01947	-0.0115956	-1.32885	-0.714301	-0.240188	2
ENSMUSG00000102162	-0.880622	0.0617881	0.442234	-0.510728	1.74185	-0.854527	4
ENSMUSG00000016200	0.627059	0.843151	0.50154	-1.87558	0.198829	-0.295001	2
ENSMUSG00000016181	0.879366	0.676768	0.346992	0.187632	-0.200554	-1.8902	2
ENSMUSG00000026638	-1.23853	-0.551496	-0.773237	0.356586	1.13584	1.07084	3
ENSMUSG00000079144	-0.412788	-1.11625	0.105136	1.86015	-0.125343	-0.310903	3
ENSMUSG00000016194	1.29744	1.04685	-0.0373447	-1.02713	-1.05548	-0.224329	2
ENSMUSG00000016179	1.29118	1.28555	-0.700211	-0.65691	-0.695489	-0.524114	2
ENSMUSG00000026640	1.43496	0.917829	0.0708381	-0.531849	-1.04881	-0.842974	2
ENSMUSG00000102841	-0.400096	0.165318	-0.588345	-0.56471	-0.567928	1.95576	1
ENSMUSG00000016494	-0.664385	0.240602	1.56343	-0.89958	-0.900524	0.660458	1
ENSMUSG00000097325	0.154176	0.966319	1.37137	-0.593835	-1.01184	-0.88619	2
ENSMUSG00000096929	0.137824	1.43456	-0.0607654	-1.0954	-1.11166	0.69545	2
ENSMUSG00000016493	0.275169	-0.091879	-1.94208	0.825978	0.582316	0.350494	1
ENSMUSG00000016481	-0.206788	0.961411	-1.69392	-0.380654	0.388392	0.931561	1
ENSMUSG00000026616	0.821063	1.06496	-0.9146	-0.90249	-0.911495	0.842559	2
ENSMUSG00000050530	0.802286	1.21942	0.346013	-0.0269317	-1.23839	-1.1024	2
ENSMUSG00000026643	-0.964687	-0.900415	-0.435202	0.0966471	0.539761	1.6639	3
ENSMUSG00000049950	-1.40108	-0.355124	1.11271	1.18067	-0.00928042	-0.527894	4
ENSMUSG00000026644	1.08773	0.602724	0.804588	-0.203292	-1.40933	-0.88242	2
ENSMUSG00000026645	0.914522	1.28241	0.284112	-0.322354	-1.12653	-1.03216	2
ENSMUSG00000026650	-0.76343	1.56583	0.474522	-0.862355	-0.88204	0.467474	1
ENSMUSG00000026648	0.167154	0.409744	-1.84046	-0.256936	1.07242	0.448082	1
ENSMUSG00000026646	0.529521	1.33182	0.763057	-0.973363	-0.988658	-0.662373	2
ENSMUSG00000109865	1.09162	-0.70043	-1.35256	1.18543	0.0582659	-0.282326	3
ENSMUSG00000051396	-1.17674	-0.973708	1.0365	1.21246	0.193589	-0.292089	4
ENSMUSG00000039496	-1.18779	1.18287	0.669399	0.618742	-0.124061	-1.15916	4
ENSMUSG00000082580	-1.36517	-1.1179	0.304079	0.789808	1.01509	0.374098	3
ENSMUSG00000026655	1.23247	1.17312	0.0634319	-0.61	-0.910988	-0.948037	2
ENSMUSG00000081070	0.744263	1.21956	0.163507	-0.406459	-0.0585366	-1.66234	2
ENSMUSG00000085656	0.766826	1.10438	0.695978	-0.372082	-0.814502	-1.3806	2
ENSMUSG00000086445	-0.630405	-0.742659	1.77781	0.600961	-0.394279	-0.611424	4
ENSMUSG00000026657	1.06222	1.10861	0.122959	-0.505885	-1.51578	-0.272121	2
ENSMUSG00000086458	-0.678677	0.179081	1.03034	-0.956937	-0.891254	1.31745	1
ENSMUSG00000039449	0.512067	0.893951	0.102971	0.207123	0.240264	-1.95638	2
ENSMUSG00000083378	-1.01867	-1.07155	1.17472	0.00457277	1.16933	-0.258406	4
ENSMUSG00000048186	-0.936906	0.230024	0.454522	-1.10977	-0.241808	1.60394	1
ENSMUSG00000083407	0.923907	1.25468	0.292259	-0.569072	-0.529854	-1.37192	2
ENSMUSG00000026662	-0.790294	-1.35641	-0.385379	0.458282	0.92126	1.15254	3
ENSMUSG00000026664	-0.76671	-1.25148	-0.198137	0.120983	0.501397	1.59395	3
ENSMUSG00000086670	-0.47435	-0.648358	1.85617	-0.731014	0.431723	-0.434167	4
ENSMUSG00000082795	0.851828	0.677565	-0.99333	-0.944701	-0.758136	1.16677	1
ENSMUSG00000069188	0.813216	-0.34266	-0.991226	-0.73658	-0.347553	1.6048	1
ENSMUSG00000026668	-0.484862	1.01537	-0.829821	-0.764909	1.50524	-0.441018	1
ENSMUSG00000026669	0.628694	0.462607	-2.01704	0.219328	0.464309	0.2421	1
ENSMUSG00000026672	0.330944	1.13833	-0.632911	-0.868786	-1.08805	1.12047	1
ENSMUSG00000026676	1.22265	1.30926	-0.363717	-0.89255	-0.482296	-0.793351	2
ENSMUSG00000039145	1.07892	1.00953	0.421342	-0.358429	-1.38922	-0.762138	2
ENSMUSG00000039128	0.387418	0.823445	-0.661017	-1.09216	-0.82315	1.36547	1
ENSMUSG00000025817	0.707502	1.05266	-0.0601332	-1.29015	-1.11027	0.700395	2
ENSMUSG00000025816	-1.03731	-1.42054	1.06711	0.615323	0.17789	0.597535	3
ENSMUSG00000085818	-0.849678	-0.315216	1.34326	0.104479	0.93641	-1.21925	4
ENSMUSG00000025815	-1.08818	0.0876799	0.495211	0.927728	0.93181	-1.35425	4
ENSMUSG00000043241	0.991969	1.20859	0.359708	-1.24536	-0.584938	-0.729969	2
ENSMUSG00000045319	-1.08998	-1.34584	0.333562	1.037	0.883809	0.181438	3
ENSMUSG00000082332	0.633524	0.288858	1.55995	-0.694056	-0.870904	-0.917374	2
ENSMUSG00000102887	1.08897	0.958168	0.444283	-0.184066	-1.11602	-1.19134	2
ENSMUSG00000039063	0.940473	1.19848	0.298889	-0.715873	-0.315662	-1.40631	2
ENSMUSG00000039046	1.33683	0.89502	0.359415	-0.988179	-0.904519	-0.698566	2
ENSMUSG00000086109	1.4583	0.634153	0.238793	-0.153985	-1.18927	-0.987994	2
ENSMUSG00000002107	1.01502	1.23498	0.337583	-0.685324	-1.11176	-0.790509	2
ENSMUSG00000087079	0.886839	1.60617	-0.733491	-0.706114	-0.672158	-0.381242	2
ENSMUSG00000075538	-0.530312	1.45621	-0.684255	-0.674191	-0.673089	1.10564	1
ENSMUSG00000085070	0.813966	1.41434	0.343764	-0.882722	-0.924583	-0.764768	2
ENSMUSG00000082953	-1.09082	-1.35033	0.911497	0.742643	0.777365	0.00963873	3
ENSMUSG00000085580	1.18393	1.1656	0.207771	-0.874318	-0.930611	-0.752368	2
ENSMUSG00000079604	0.800086	1.51924	-0.00596002	-0.970811	-0.993798	-0.348756	2
ENSMUSG00000015619	1.0553	0.980914	-1.29741	-1.07434	0.0445689	0.290972	2
ENSMUSG00000025782	1.17741	1.00978	0.339131	-0.358071	-1.07502	-1.09323	2
ENSMUSG00000103570	1.55828	-0.0272473	0.766958	-0.769001	-1.09806	-0.430922	2
ENSMUSG00000025781	-1.163	-1.26378	0.0661567	0.511253	0.731728	1.11764	3
ENSMUSG00000037262	0.348707	-0.557239	0.883225	1.19741	-0.387586	-1.48452	4
ENSMUSG00000037254	0.493486	1.71071	-0.938216	-0.905637	-0.359878	-0.000466293	2
ENSMUSG00000025780	-0.729139	1.5443	0.477096	-0.881711	-0.910324	0.499782	1
ENSMUSG00000086748	-1.09654	-0.51227	0.694428	-0.617129	-0.10008	1.63159	1
ENSMUSG00000061186	-1.15786	-0.0144307	-0.710522	-0.399798	0.70009	1.58252	1
ENSMUSG00000083900	-0.17372	0.395256	-0.214542	1.75428	-0.616964	-1.14431	4
ENSMUSG00000026778	-0.959494	-1.05707	1.42041	0.885519	0.0986298	-0.387998	4
ENSMUSG00000082424	-0.240175	-0.472557	-0.00624295	-0.39971	-0.843061	1.96175	1
ENSMUSG00000026773	-0.558315	-0.865885	0.503054	1.24347	0.860434	-1.18275	4
ENSMUSG00000102329	-0.819922	-0.898004	0.355961	0.625544	1.537	-0.800581	3
ENSMUSG00000037197	-0.287435	-0.895346	0.2471	1.14847	1.0583	-1.27109	4
ENSMUSG00000026770	0.934273	1.46331	0.00440804	-0.869202	-0.933149	-0.599639	2
ENSMUSG00000023206	-0.204851	1.64321	-0.900926	0.445578	0.126765	-1.10978	2
ENSMUSG00000058594	1.34865	1.04723	-0.135638	-0.552653	-1.24283	-0.464757	2
ENSMUSG00000047909	-0.114038	-0.241577	-1.53552	0.48289	-0.116257	1.5245	1
ENSMUSG00000080801	-1.09357	-0.652832	0.212194	0.963823	1.34379	-0.773407	3
ENSMUSG00000026768	1.05322	1.16713	0.356317	-0.660819	-1.21255	-0.703297	2
ENSMUSG00000026767	1.12682	1.34656	-0.143889	-0.624349	-1.01502	-0.690124	2
ENSMUSG00000102630	-0.79804	-0.899674	1.41834	0.965104	0.0904363	-0.776165	4
ENSMUSG00000104449	-1.71521	-0.525932	0.742714	0.817391	-0.0655591	0.746595	3
ENSMUSG00000104406	-1.04682	-1.15629	0.997555	0.615769	-0.418875	1.00867	3
ENSMUSG00000026730	1.13473	1.21856	0.15794	-0.675667	-0.742603	-1.09296	2
ENSMUSG00000104459	1.11561	0.551861	0.32524	-1.22928	-1.25994	0.496505	2
ENSMUSG00000103143	1.092	1.42544	-0.519689	-0.898252	-0.332627	-0.766869	2
ENSMUSG00000026727	1.15082	1.00591	-0.658778	-1.17993	-0.786294	0.468272	2
ENSMUSG00000102691	1.05487	1.16059	-1.17511	-0.554917	0.362941	-0.848374	2
ENSMUSG00000086358	-1.26549	1.28599	0.377786	-0.83504	-0.41778	0.854532	1
ENSMUSG00000026726	-0.181413	-0.265473	-0.119305	-1.09246	-0.246166	1.90481	1
ENSMUSG00000026723	1.14864	1.04123	-1.35184	-0.537578	-0.616525	0.316086	2
ENSMUSG00000026728	-1.19565	0.294156	0.635806	-1.32987	0.659548	0.936004	1
ENSMUSG00000003418	1.1825	1.05915	0.256792	-0.525589	-0.676912	-1.29595	2
ENSMUSG00000063275	1.11493	0.315795	-0.369457	-1.68831	-0.173173	0.800208	1
ENSMUSG00000086657	0.314946	-0.283675	-0.151137	-0.0326434	-1.47048	1.62299	1
ENSMUSG00000026718	0.70419	0.525515	-1.51351	-0.935564	0.2106	1.00877	1
ENSMUSG00000061531	1.63108	-0.65693	-0.699494	-0.677013	0.864297	-0.461937	2
ENSMUSG00000083545	-1.29063	-0.964133	0.125227	1.45892	0.468978	0.201638	3
ENSMUSG00000026712	1.07317	1.04386	0.475767	-0.921456	-0.457165	-1.21418	2
ENSMUSG00000036949	1.1514	1.32137	-0.941218	-0.91568	-0.223515	-0.392356	2
ENSMUSG00000084901	0.122538	1.62389	0.629492	-0.933629	-0.862446	-0.579847	2
ENSMUSG00000057914	1.16934	1.09273	0.339345	-0.766967	-1.07937	-0.755079	2
ENSMUSG00000070271	-1.7799	-0.400835	0.333042	1.12982	0.473405	0.244472	3
ENSMUSG00000103050	0.652002	0.825795	1.21175	-0.919125	-0.964621	-0.805806	2
ENSMUSG00000087086	0.881652	0.977651	0.831095	-1.02957	-1.09212	-0.568708	2
ENSMUSG00000085281	-1.38479	-0.879351	0.680972	0.901468	0.973454	-0.291754	3
ENSMUSG00000026707	0.40653	-0.244222	-1.54248	0.619079	-0.547617	1.30871	1
ENSMUSG00000017418	-0.744265	-1.10678	0.0718242	0.865017	-0.555274	1.46948	3
ENSMUSG00000102258	-0.579881	-0.0944349	-0.80667	-0.796837	0.51645	1.76137	1
ENSMUSG00000083860	-1.395	-0.47158	0.967546	0.165088	1.26108	-0.527129	4
ENSMUSG00000075520	1.20877	0.9026	0.168517	-1.28392	-1.02303	0.0270653	2
ENSMUSG00000026748	1.23361	1.00181	-0.0518615	-0.0154454	-1.33031	-0.83781	2
ENSMUSG00000081525	1.61404	0.715005	-0.799894	-0.778713	-0.797016	0.046573	2
ENSMUSG00000053702	0.90384	1.36833	0.228675	-0.667643	-1.17387	-0.659339	2
ENSMUSG00000054057	-1.13159	-0.112894	-0.801351	-0.312793	0.874995	1.48363	1
ENSMUSG00000085319	-0.610795	-0.762382	0.200876	-0.794136	0.13432	1.83212	1
ENSMUSG00000054074	-1.07591	-0.230548	-0.552006	0.0784567	-0.0831894	1.86319	1
ENSMUSG00000086340	-0.328601	0.330394	-0.325098	-0.486656	-1.02895	1.83891	1
ENSMUSG00000026743	1.21106	1.16294	0.145756	-0.670195	-0.928459	-0.921111	2
ENSMUSG00000081619	-0.843018	-0.897154	-0.926234	1.01726	1.16506	0.484083	3
ENSMUSG00000026740	1.80706	-0.233244	-0.362332	0.177176	-0.168384	-1.22028	2
ENSMUSG00000082520	-1.02888	-1.2065	0.35218	-0.258495	1.04358	1.09811	3
ENSMUSG00000051154	1.00504	1.14675	-0.60421	-0.960312	-1.07311	0.485837	2
ENSMUSG00000026739	0.735634	1.03493	0.752527	-0.204917	-0.944011	-1.37416	2
ENSMUSG00000037708	-0.484723	0.978207	-0.707895	-0.692415	-0.645776	1.5526	1
ENSMUSG00000026737	-0.431901	0.604686	-0.350913	-0.719957	-0.855385	1.75347	1
ENSMUSG00000037683	1.10366	1.19507	-0.0407231	-1.07914	-1.08576	-0.0931046	2
ENSMUSG00000023094	-0.821825	-0.908331	-0.327598	-0.410461	0.936033	1.53218	3
ENSMUSG00000043415	-0.330647	0.241232	1.33228	-1.39595	-0.664109	0.817196	1
ENSMUSG00000087246	0.859365	1.21116	0.529817	-1.04421	-1.1042	-0.451939	2
ENSMUSG00000036617	1.31591	1.07604	-0.625982	-1.0753	-0.747749	0.0570811	2
ENSMUSG00000083777	1.30041	1.2294	-0.261918	-0.774813	-0.829957	-0.663125	2
ENSMUSG00000060795	-0.857882	-0.258886	1.23586	0.296529	0.90919	-1.32481	4
ENSMUSG00000082164	-0.516719	-0.615717	1.97395	-0.0826732	-0.664613	-0.0942261	4
ENSMUSG00000081128	-1.52805	-0.520097	-0.37208	0.539299	0.627138	1.25379	3
ENSMUSG00000091457	1.5934	0.923902	-0.692025	-0.64307	-0.681253	-0.50095	2
ENSMUSG00000085477	-1.02873	-0.367031	1.55855	0.471479	0.37369	-1.00796	4
ENSMUSG00000036591	1.12094	0.786397	0.560156	-0.525785	-0.400873	-1.54083	2
ENSMUSG00000085206	-0.313769	-0.217287	-1.01304	0.785704	1.58816	-0.829768	3
ENSMUSG00000075514	0.261066	-0.0619892	-0.836017	-0.18055	-0.980918	1.79841	1
ENSMUSG00000086821	0.359682	1.10552	0.943183	-0.799956	-0.161789	-1.44664	2
ENSMUSG00000026679	-0.816492	0.138222	-1.33493	1.55794	0.201425	0.25384	3
ENSMUSG00000048550	1.20472	1.15952	-0.44259	-0.769896	-1.18918	0.0374322	2
ENSMUSG00000084071	0.698535	0.234132	1.25759	-0.510422	-0.0639588	-1.61588	2
ENSMUSG00000085680	-0.594543	-0.724696	1.87882	-0.744731	-0.00639677	0.191544	4
ENSMUSG00000045967	1.25818	0.728251	0.473591	-0.176237	-1.25014	-1.03365	2
ENSMUSG00000081467	-1.09058	-1.18689	-0.253255	0.72876	1.20361	0.598349	3
ENSMUSG00000025716	-0.0879066	0.100219	1.67482	0.215299	-0.550446	-1.35199	4
ENSMUSG00000082516	-1.65283	1.12415	0.925103	0.046276	-0.065653	-0.377047	4
ENSMUSG00000083863	-1.46027	-0.372303	1.02215	0.838027	0.686745	-0.714351	4
ENSMUSG00000083563	-1.10421	-0.308489	0.892273	0.868854	0.844067	-1.1925	4
ENSMUSG00000082884	-1.32073	-0.35748	1.04418	0.852375	0.693077	-0.911419	4
ENSMUSG00000026787	1.14865	1.19399	-0.631496	-0.382693	-1.30741	-0.0210431	2
ENSMUSG00000026786	-0.935171	1.64905	-1.15001	0.125354	0.0564889	0.254284	1
ENSMUSG00000026784	-0.989017	-1.19977	-0.0354408	0.33771	0.356903	1.52961	3
ENSMUSG00000058835	1.29075	1.1612	-0.112688	-1.06322	-0.757015	-0.51902	2
ENSMUSG00000083650	-0.667007	-0.919594	1.51653	-0.944876	0.536895	0.478049	4
ENSMUSG00000026781	0.929682	1.13352	0.174244	-0.22754	-0.393069	-1.61684	2
ENSMUSG00000026779	1.35467	1.16191	-0.313459	-0.534734	-0.694738	-0.973645	2
ENSMUSG00000026775	-1.52727	-0.986464	0.408462	0.665175	0.875095	0.565006	3
ENSMUSG00000081648	-0.44678	-0.680591	-0.823977	0.572576	1.78023	-0.401461	3
ENSMUSG00000026774	-0.543581	-0.662384	1.26444	-0.684572	-0.687532	1.31363	1
ENSMUSG00000084098	-1.54907	-0.308024	0.593891	0.710965	1.14066	-0.58842	3
ENSMUSG00000026771	-0.75884	1.834	0.422678	-0.514533	-0.233058	-0.75025	2
ENSMUSG00000083373	0.490162	0.29935	1.61599	-0.515838	-1.00476	-0.884908	2
ENSMUSG00000026986	0.794579	0.909735	0.524862	0.0067319	-0.49914	-1.73677	2
ENSMUSG00000061809	1.19453	1.22673	0.0483742	-0.97103	-0.741822	-0.756776	2
ENSMUSG00000083116	-0.816493	-0.96891	1.466	-0.455974	0.994682	-0.219304	4
ENSMUSG00000026979	-1.05729	-0.78106	-0.882289	0.858044	0.824545	1.03805	3
ENSMUSG00000085330	1.33546	1.22711	-0.441462	-0.734252	-0.78019	-0.606665	2
ENSMUSG00000084241	-0.994688	0.641629	1.41968	-0.617298	0.517433	-0.966757	4
ENSMUSG00000004113	-0.0309676	-0.546072	-0.0169326	1.24216	0.889896	-1.53808	4
ENSMUSG00000036893	1.14969	-1.52452	0.512366	0.645392	0.0377903	-0.820716	4
ENSMUSG00000103162	-0.498574	-0.676953	1.75637	-0.766402	0.642199	-0.456643	4
ENSMUSG00000102875	-1.05952	-1.11921	0.686104	-0.358842	0.531206	1.32026	3
ENSMUSG00000026972	0.466017	0.523113	0.300591	0.533146	0.200582	-2.02345	4
ENSMUSG00000026974	0.285249	0.0742925	1.13783	0.469285	-0.127653	-1.839	4
ENSMUSG00000026975	-1.27397	-1.26553	0.677399	0.935438	0.541334	0.385329	3
ENSMUSG00000036850	-1.6338	-0.852628	0.668194	0.768223	0.4361	0.613912	3
ENSMUSG00000036833	-1.08898	-1.42807	0.930213	0.596468	0.31736	0.673011	3
ENSMUSG00000084383	-1.55442	-0.945288	0.319465	0.708247	0.775562	0.696439	3
ENSMUSG00000083796	-1.27213	0.645126	0.250323	0.613436	0.999322	-1.23608	4
ENSMUSG00000006476	-0.916465	0.0501759	0.641973	0.0335906	1.4603	-1.26958	4
ENSMUSG00000036813	-1.08177	-1.1342	1.18268	0.777853	0.631187	-0.375744	4
ENSMUSG00000118563	-0.992158	0.573544	-1.10411	1.56451	0.0766838	-0.118476	3
ENSMUSG00000087028	-0.991867	-1.07707	0.55436	1.24011	0.834819	-0.560356	3
ENSMUSG00000078202	-0.960184	-0.334381	1.37858	1.07014	-0.220345	-0.933811	4
ENSMUSG00000059555	-0.925601	-1.21229	-0.359929	0.743932	0.401251	1.35264	3
ENSMUSG00000013465	-0.163823	-1.89983	0.184207	0.919083	0.370636	0.58973	3
ENSMUSG00000036770	-1.12835	-1.28083	1.21365	0.482814	0.105118	0.607599	3
ENSMUSG00000026969	-0.748687	1.51444	-0.958454	-0.453746	0.960585	-0.314141	1
ENSMUSG00000036752	-1.36539	0.487933	0.171024	1.50178	-0.0124667	-0.782876	4
ENSMUSG00000006469	-0.273899	-0.424657	-0.461175	-0.433071	-0.44374	2.03654	1
ENSMUSG00000089953	-0.38722	0.383393	-0.648795	-0.604389	-0.621857	1.87887	1
ENSMUSG00000044628	-1.27064	-0.546464	-0.125472	-0.298214	1.60599	0.634801	3
ENSMUSG00000006471	-1.12476	-0.933739	-0.35675	1.17051	1.16597	0.0787693	3
ENSMUSG00000078201	-1.36777	-1.16358	0.449063	0.923273	0.736941	0.422065	3
ENSMUSG00000048707	-0.0841136	-1.00775	0.172619	1.53278	0.53286	-1.1464	4
ENSMUSG00000026966	0.412343	-1.81202	0.106095	-0.0359581	1.23493	0.0946046	3
ENSMUSG00000026965	0.904844	-0.00430061	-1.69197	-0.136716	-0.19511	1.12326	1
ENSMUSG00000026963	-0.683796	-0.382741	-0.378436	0.159711	1.94479	-0.659533	3
ENSMUSG00000026961	-0.677025	-0.908659	0.20789	-0.936431	0.914176	1.40005	1
ENSMUSG00000026959	-1.22411	-0.982889	-0.0158432	0.904914	1.31008	0.00784565	3
ENSMUSG00000085830	-0.571237	-0.701271	-0.746957	1.36758	1.20378	-0.551898	3
ENSMUSG00000036646	-1.20566	-1.26718	0.341869	0.977199	0.895666	0.258109	3
ENSMUSG00000026958	-1.0112	-1.26924	-0.202597	0.73314	0.516544	1.23335	3
ENSMUSG00000026956	-1.23239	-1.31645	0.390407	0.878564	0.689133	0.590738	3
ENSMUSG00000026955	-1.32955	-1.12325	0.551947	0.976215	0.840136	0.0844993	3
ENSMUSG00000015085	-0.381891	-1.41793	0.242953	1.03376	1.15012	-0.627017	3
ENSMUSG00000015094	-0.548401	-1.48773	0.549883	1.13293	0.823802	-0.470492	3
ENSMUSG00000026944	1.7612	-0.293467	0.263092	0.00619533	-0.526334	-1.21069	2
ENSMUSG00000047617	-1.82637	-0.228531	0.763266	0.822475	0.583188	-0.114029	3
ENSMUSG00000015093	-0.651249	-0.335231	-0.198926	-0.778764	1.9538	0.0103695	3
ENSMUSG00000015090	0.700653	1.1123	0.564449	-1.44108	-7.40908e-05	-0.936242	2
ENSMUSG00000015083	0.693175	0.90359	-0.492704	-1.24987	-0.898555	1.04436	1
ENSMUSG00000015095	0.452006	0.521115	-0.779345	-0.292174	-1.33401	1.43241	1
ENSMUSG00000026942	-0.938921	-1.55508	0.515113	0.816133	0.796702	0.366055	3
ENSMUSG00000015092	-1.22031	-1.33687	0.381744	0.738009	0.726535	0.710896	3
ENSMUSG00000026941	-1.21409	-1.32255	0.560242	0.714549	0.910432	0.351423	3
ENSMUSG00000036504	-1.36908	-0.352455	-0.770426	0.643764	1.3019	0.546297	3
ENSMUSG00000029419	-0.163781	-1.75762	0.0749676	1.1676	-0.0378149	0.716647	3
ENSMUSG00000015087	1.64921	-0.211137	-0.417187	-0.744986	-0.994809	0.718907	2
ENSMUSG00000026939	-1.92387	0.0964985	0.0956837	0.677716	0.891342	0.162635	3
ENSMUSG00000049086	-1.0223	-0.69211	-0.646359	0.222898	0.467619	1.67025	1
ENSMUSG00000023210	-0.665853	0.0406893	0.353584	-0.884988	1.79852	-0.641948	4
ENSMUSG00000059625	-0.951487	-1.06397	1.33394	0.960902	0.192632	-0.472024	4
ENSMUSG00000058740	-0.208755	1.33926	-0.783145	-1.40154	0.40556	0.64862	1
ENSMUSG00000026933	1.08789	0.591085	0.621446	-0.101649	-0.527865	-1.67091	2
ENSMUSG00000036352	-1.31589	-1.09274	1.00972	0.983819	0.227277	0.187811	3
ENSMUSG00000026932	0.286854	-0.720801	0.525112	1.11791	0.43029	-1.63937	4
ENSMUSG00000087679	0.175952	-0.312757	1.3254	0.9253	-0.947268	-1.16663	4
ENSMUSG00000036327	-0.805169	-1.55501	0.395245	1.16745	0.618417	0.179069	3
ENSMUSG00000048038	-1.13496	-1.18176	0.817541	0.57974	1.12611	-0.206672	3
ENSMUSG00000026930	-0.238031	-0.155392	-1.01566	0.427917	1.76007	-0.7789	3
ENSMUSG00000075467	-1.26916	-0.619635	-0.0975827	-0.0290963	0.313533	1.70194	1
ENSMUSG00000026928	0.694621	0.362631	-0.52526	-1.42504	-0.470161	1.3632	1
ENSMUSG00000086779	-0.562638	-0.468446	0.990613	-0.778376	-0.717866	1.53671	1
ENSMUSG00000036281	-1.08188	-1.26352	0.470446	1.30614	0.55269	0.0161259	3
ENSMUSG00000085767	-1.22827	-1.32787	0.415722	0.599752	0.704152	0.836514	3
ENSMUSG00000026927	-0.408858	-0.638353	0.791277	1.46655	0.0713323	-1.28194	4
ENSMUSG00000026926	-1.50281	-0.972552	0.250999	0.671856	0.581075	0.971429	3
ENSMUSG00000026925	1.32707	0.447011	-0.0947481	-1.35896	-0.912517	0.59214	2
ENSMUSG00000026924	1.13937	0.637843	0.604056	0.0198479	-1.04724	-1.35388	2
ENSMUSG00000086714	1.1434	-0.647491	-0.597191	-0.373667	1.39167	-0.916722	2
ENSMUSG00000026923	1.35154	-0.181457	-1.31656	-0.885861	0.304656	0.727676	1
ENSMUSG00000026921	-1.12062	-1.21699	0.171392	0.254976	0.541906	1.36934	3
ENSMUSG00000026922	-1.37073	-0.751264	-0.441627	0.544893	0.892946	1.12579	3
ENSMUSG00000036186	1.66748	-0.400706	0.225884	0.202559	-0.332813	-1.3624	2
ENSMUSG00000077192	-0.61806	-0.779213	-0.850448	0.320484	0.148837	1.7784	1
ENSMUSG00000086775	-1.39114	-0.409635	0.790064	-0.232586	-0.228565	1.47186	1
ENSMUSG00000015787	-1.20517	-1.30872	0.226756	0.601285	0.823	0.862853	3
ENSMUSG00000036160	-1.46404	-0.371618	0.474958	1.34782	0.58791	-0.575024	4
ENSMUSG00000015776	1.50338	0.891218	-0.752507	-0.263	-0.265763	-1.11333	2
ENSMUSG00000062647	-1.68182	-0.501214	-0.168409	0.608972	0.832814	0.909657	3
ENSMUSG00000065258	-0.999292	-1.07741	-0.597957	1.09595	0.655595	0.923109	3
ENSMUSG00000015790	-1.6146	0.386935	-0.733179	0.312484	0.470892	1.17746	1
ENSMUSG00000014873	-1.00335	-1.47534	0.233211	0.694858	0.971805	0.57882	3
ENSMUSG00000014867	1.52382	0.926204	-0.904684	-0.785486	-0.598985	-0.160873	2
ENSMUSG00000049897	-0.863297	-0.922654	0.646546	1.38463	0.597849	-0.843077	4
ENSMUSG00000052406	-1.62247	-0.694153	0.360311	0.942314	0.927642	0.0863517	3
ENSMUSG00000014852	-0.205622	-0.298028	-1.21339	-0.560042	1.63371	0.643365	1
ENSMUSG00000015488	1.1031	1.37157	-0.582648	-0.970254	-0.14762	-0.774148	2
ENSMUSG00000087364	0.729406	1.38328	0.273562	-0.597034	-0.38344	-1.40577	2
ENSMUSG00000085008	0.509165	1.66783	-0.803868	-0.790043	-0.800816	0.217729	2
ENSMUSG00000000889	0.970084	1.40876	-0.215766	-0.359674	-1.27067	-0.532732	2
ENSMUSG00000009614	-0.924704	-0.877125	0.706914	1.13247	0.873594	-0.911149	4
ENSMUSG00000009621	0.933842	0.336498	-1.50508	-0.910744	0.936006	0.209477	1
ENSMUSG00000086669	0.266049	1.92489	-0.607796	-0.577217	-0.590878	-0.415052	2
ENSMUSG00000109946	0.400049	0.69748	-0.847786	0.254287	-1.56409	1.06006	1
ENSMUSG00000026918	-0.192573	-1.07999	-0.431014	1.17429	1.28732	-0.758028	3
ENSMUSG00000026917	1.48447	0.271011	-0.892234	-0.248351	0.607994	-1.22289	2
ENSMUSG00000080538	-0.529053	1.97877	-0.0474472	-0.714831	-0.177833	-0.509608	2
ENSMUSG00000085929	-0.789527	-0.922539	0.468891	1.18497	1.00375	-0.945542	4
ENSMUSG00000015846	-0.440806	-0.400558	0.296888	0.7558	1.30209	-1.51341	4
ENSMUSG00000026837	-0.379107	-0.0969626	-0.531765	-0.481779	-0.524547	2.01416	1
ENSMUSG00000086425	0.693265	1.25336	0.721341	-0.717896	-0.899664	-1.05041	2
ENSMUSG00000026833	1.22043	1.05412	0.238315	-0.443498	-0.985802	-1.08356	2
ENSMUSG00000087196	0.939161	1.55533	-0.308649	-0.761625	-0.780667	-0.643548	2
ENSMUSG00000035829	-0.395977	-0.907275	-1.18474	0.340317	1.38559	0.762084	3
ENSMUSG00000026831	-1.21442	-0.627549	-0.253044	0.00571065	0.379545	1.70975	1
ENSMUSG00000035772	-0.00375173	-0.900854	-1.36711	0.413706	0.469546	1.38846	1
ENSMUSG00000082895	-1.28134	-1.23985	0.243708	0.621641	0.782048	0.873792	3
ENSMUSG00000026829	-0.639492	-0.771985	-0.823835	0.578069	-0.0683154	1.72556	1
ENSMUSG00000063611	-0.542406	-0.556504	-0.0753194	-0.559067	-0.26819	2.00149	1
ENSMUSG00000026821	-0.172791	0.0314309	0.42099	0.126446	1.32887	-1.73495	4
ENSMUSG00000026816	-1.42378	-1.05196	0.768773	0.886702	0.686342	0.133915	3
ENSMUSG00000026815	-1.17511	-0.0447495	-0.616285	0.721	1.58122	-0.466077	3
ENSMUSG00000026812	1.5806	0.490024	-0.282076	0.17116	-0.638921	-1.32079	2
ENSMUSG00000026809	-1.37392	-0.0478358	-0.502561	-0.2363	0.596821	1.5638	1
ENSMUSG00000026807	0.648826	0.935708	0.00909144	0.608315	-0.426777	-1.77516	2
ENSMUSG00000035666	-1.21883	-1.17162	0.799755	0.923446	0.795569	-0.128318	3
ENSMUSG00000026806	-1.5932	-0.837087	0.393306	0.937984	0.797075	0.301925	3
ENSMUSG00000026805	1.19201	-0.244453	0.445468	-0.915817	0.849589	-1.3268	2
ENSMUSG00000079502	-1.25913	-0.775991	-0.300354	0.530073	0.265721	1.53968	3
ENSMUSG00000083773	-0.448075	-0.608284	0.0577592	-0.0701198	-0.853063	1.92178	1
ENSMUSG00000026803	-1.06016	-1.46968	0.716632	0.812693	0.644377	0.356142	3
ENSMUSG00000043535	-0.73767	-1.41574	1.10294	0.600627	0.846663	-0.39682	4
ENSMUSG00000035513	0.503195	-0.436425	1.6604	-0.93641	-0.947602	0.156847	4
ENSMUSG00000079499	-0.276253	-0.408637	-0.467824	-0.429021	-0.454692	2.03643	1
ENSMUSG00000026799	1.21023	0.439121	-0.0965788	0.154735	0.108393	-1.8159	2
ENSMUSG00000086994	-0.813249	-0.918545	0.702956	1.5098	0.30979	-0.790752	4
ENSMUSG00000098539	-0.83787	-1.01324	1.20786	0.507976	0.946617	-0.811336	4
ENSMUSG00000039844	1.4446	0.919407	-0.794899	-0.21031	-1.16343	-0.195361	2
ENSMUSG00000079497	-0.593663	-0.120986	0.0774931	1.94042	-0.730568	-0.572692	4
ENSMUSG00000039826	-1.29254	-1.06822	1.06381	0.997838	0.0597736	0.239347	3
ENSMUSG00000026798	-1.59183	-0.921852	0.671044	0.689056	0.690319	0.463267	3
ENSMUSG00000059316	-1.28398	-1.24267	0.681155	0.891664	0.692809	0.261026	3
ENSMUSG00000069020	-1.461	-0.858545	0.459516	0.999813	0.953367	-0.0931461	3
ENSMUSG00000039787	-0.588079	-1.73332	1.01164	0.621157	0.385783	0.302819	3
ENSMUSG00000026790	1.37348	1.01312	-0.164169	-0.81826	-1.15196	-0.252214	2
ENSMUSG00000019715	1.64101	0.528275	-0.516439	0.0644812	-0.482791	-1.23453	2
ENSMUSG00000057738	0.688835	0.12652	-0.205691	0.212141	1.01817	-1.83998	4
ENSMUSG00000039715	-1.14791	-1.33246	0.360769	0.984709	0.852966	0.28193	3
ENSMUSG00000054766	-1.37251	-1.17416	0.350118	0.673494	0.789263	0.733794	3
ENSMUSG00000026785	-0.609647	-1.5807	0.961524	0.979359	0.452558	-0.203098	4
ENSMUSG00000015335	-1.34469	-0.930309	0.293892	0.660756	-0.0223625	1.34271	3
ENSMUSG00000039686	-1.29694	-1.10159	0.949803	0.558293	0.942298	-0.0518583	3
ENSMUSG00000039678	1.15656	-1.53305	0.814107	-0.0492485	-0.728747	0.340381	4
ENSMUSG00000085401	-1.15602	-0.79559	0.392849	0.977298	1.22672	-0.645262	3
ENSMUSG00000015337	-1.31251	-1.12523	0.276109	1.17812	0.669737	0.313769	3
ENSMUSG00000039660	-1.73469	-0.608925	0.365686	0.724144	0.330276	0.923509	3
ENSMUSG00000039648	-0.34536	-1.06986	-1.13192	0.474799	0.833519	1.23883	3
ENSMUSG00000100747	-1.07259	-0.412507	1.77504	0.45078	-0.210533	-0.53019	4
ENSMUSG00000007476	0.692606	0.774243	0.797753	0.142133	-1.63235	-0.774386	2
ENSMUSG00000079484	-0.858504	-0.915016	1.09413	1.34251	-0.65281	-0.010308	4
ENSMUSG00000075419	-1.58455	-0.847727	0.593487	1.04068	0.490788	0.30732	3
ENSMUSG00000052533	1.36522	0.877708	-0.420829	-0.448283	-1.40942	0.0356076	2
ENSMUSG00000026860	-0.0964982	0.802111	-0.465889	-1.72488	0.581001	0.904152	1
ENSMUSG00000026858	-1.16339	-1.35733	0.593554	0.995823	0.580793	0.350551	3
ENSMUSG00000026856	-1.4922	-1.02957	0.333218	0.718811	0.787483	0.682257	3
ENSMUSG00000026853	-1.07809	-1.15603	-0.136874	1.34894	0.24584	0.776214	3
ENSMUSG00000039515	0.950125	-1.78044	-0.260993	0.889042	-0.0543018	0.256568	3
ENSMUSG00000089762	1.13142	1.27866	-0.199938	-0.257762	-0.785637	-1.16674	2
ENSMUSG00000044320	-1.26566	-0.935143	0.669323	1.05913	0.885139	-0.412794	3
ENSMUSG00000085491	-0.767598	-0.84252	-0.0405173	1.56179	0.836944	-0.748098	3
ENSMUSG00000026857	-1.39762	-1.03632	0.832113	0.974118	0.573045	0.0546685	3
ENSMUSG00000039483	-1.32108	-1.20796	0.282776	0.84553	0.799568	0.601163	3
ENSMUSG00000039476	-0.76203	-0.868698	1.25343	1.23603	-0.115451	-0.743286	4
ENSMUSG00000050737	-1.41594	-0.0940116	0.757355	-0.484141	-0.222322	1.45906	1
ENSMUSG00000026848	-1.07093	-1.33397	0.810267	0.954047	0.708698	-0.0681106	3
ENSMUSG00000026849	1.58559	0.886655	-0.317273	-0.534966	-0.828659	-0.791345	2
ENSMUSG00000026851	-1.82823	0.0983765	-0.381988	0.798732	0.62596	0.687151	3
ENSMUSG00000026854	-0.550867	0.782469	0.596892	0.575687	0.395801	-1.79998	4
ENSMUSG00000075415	-1.04302	-1.45432	0.257145	0.596433	0.71183	0.931934	3
ENSMUSG00000087269	-1.50633	-0.856157	1.00638	0.895419	0.0337672	0.426914	3
ENSMUSG00000000194	-1.60978	-0.779308	0.172796	0.958813	0.80406	0.45342	3
ENSMUSG00000062661	-0.904673	-0.657686	-0.831483	0.942459	1.47274	-0.0213589	3
ENSMUSG00000055632	1.40059	0.654871	-1.31101	-0.930367	0.0301356	0.155781	2
ENSMUSG00000076441	-0.338496	0.258842	-0.988675	-1.02445	0.497954	1.59483	1
ENSMUSG00000084226	-0.537492	-0.662624	1.93085	-0.130755	-0.716392	0.116417	4
ENSMUSG00000026843	-0.625888	-0.307151	-0.17672	-0.445444	-0.462347	2.01755	1
ENSMUSG00000079466	-0.818704	0.245863	0.101007	-1.12094	-0.134764	1.72754	1
ENSMUSG00000039356	-1.11894	-1.2941	0.0568668	0.561791	0.628357	1.16602	3
ENSMUSG00000087549	-0.823334	-1.01943	1.27429	0.457933	0.904755	-0.794219	4
ENSMUSG00000026842	2.00873	-0.581388	-0.251304	-0.638092	-0.191529	-0.346414	2
ENSMUSG00000026841	0.669241	-1.20099	0.55645	1.10765	-1.24886	0.116502	4
ENSMUSG00000026840	-0.920932	-1.01242	1.31708	0.764166	0.557448	-0.705333	4
ENSMUSG00000001864	-1.53153	-1.00227	0.7574	0.621788	0.470035	0.684581	3
ENSMUSG00000001855	1.28668	1.01527	0.157955	-0.516222	-0.713702	-1.22999	2
ENSMUSG00000081480	-1.04221	-0.613034	1.12381	0.767655	0.792341	-1.02856	4
ENSMUSG00000050592	-0.659627	-1.2258	0.00464586	-0.378453	1.55797	0.701261	3
ENSMUSG00000051373	0.765882	1.44801	-0.438707	-0.99072	-1.03838	0.253913	2
ENSMUSG00000039262	-0.866129	-1.45068	0.0347153	0.438184	0.566909	1.277	3
ENSMUSG00000039254	1.03348	-0.203889	0.0356443	-1.63688	-0.289451	1.06109	1
ENSMUSG00000002550	-1.46345	-1.06185	0.321398	0.759442	0.660988	0.783474	3
ENSMUSG00000066068	-1.48177	-0.992026	0.281696	0.722919	0.998232	0.470954	3
ENSMUSG00000044627	0.871155	0.785722	-0.821797	-0.665334	-1.20096	1.03122	1
ENSMUSG00000002546	1.08159	0.772824	0.0335196	0.322205	-0.519578	-1.69056	2
ENSMUSG00000026825	-0.928214	0.0635919	-0.324366	-1.0977	0.819499	1.46719	1
ENSMUSG00000039205	0.830922	-1.35642	-0.426396	0.143137	-0.580601	1.38935	1
ENSMUSG00000039195	-1.56174	-0.90586	0.388588	0.887288	0.810362	0.381357	3
ENSMUSG00000026822	-0.631405	-0.81637	1.3185	-0.89912	-0.141245	1.16964	1
ENSMUSG00000026820	-0.370433	-1.82583	0.0918845	0.775916	0.798802	0.529663	3
ENSMUSG00000083004	-1.0881	-1.12698	-0.181269	0.832937	1.32815	0.235259	3
ENSMUSG00000026819	-0.642292	-1.02882	0.864881	1.03965	0.797852	-1.03127	4
ENSMUSG00000039164	-0.213456	-1.06369	1.65521	0.663996	-0.298022	-0.744035	4
ENSMUSG00000103175	-0.677695	-0.304524	-0.0396789	-0.913377	1.90025	0.0350291	3
ENSMUSG00000039157	-1.47675	-1.07881	0.515113	0.691917	0.705944	0.642589	3
ENSMUSG00000026810	-1.6605	-0.249879	0.154383	0.165503	0.137887	1.45261	3
ENSMUSG00000046854	0.612846	1.34398	0.572295	-1.15138	-0.360338	-1.0174	2
ENSMUSG00000079442	-1.22458	-1.09645	-0.0580892	0.4207	0.662884	1.29554	3
ENSMUSG00000026811	-1.42127	-1.01832	0.385125	0.191392	0.825326	1.03774	3
ENSMUSG00000026817	-0.648991	0.319104	-0.819235	-0.529846	-0.189018	1.86799	1
ENSMUSG00000026814	-1.2136	-1.00559	-0.0956645	0.936468	1.27223	0.106161	3
ENSMUSG00000009566	1.66787	0.666246	-0.497714	-0.0975209	-0.920615	-0.818267	2
ENSMUSG00000009555	-1.17743	-1.29685	0.808319	1.03037	0.403825	0.231763	3
ENSMUSG00000059013	0.731229	0.25111	0.602633	0.435245	-0.0590547	-1.96116	4
ENSMUSG00000039021	-0.41815	0.553073	0.81718	0.16567	0.705891	-1.82366	4
ENSMUSG00000009563	-0.328288	-1.62053	0.471424	1.0545	0.860484	-0.43759	3
ENSMUSG00000053746	-1.33526	-1.11905	0.68322	0.918843	0.807301	0.0449411	3
ENSMUSG00000038987	-1.18495	-0.917941	0.695496	1.13712	0.8207	-0.550425	4
ENSMUSG00000026797	1.17491	1.06454	0.142757	-0.530169	-1.41072	-0.441319	2
ENSMUSG00000026796	-0.677762	0.287197	-0.856538	-0.802975	0.325639	1.72444	1
ENSMUSG00000026792	-0.72775	-1.63664	0.670584	0.844066	0.791367	0.0583704	3
ENSMUSG00000038900	-1.52763	-0.921272	0.167814	0.608992	0.734536	0.937562	3
ENSMUSG00000026791	-1.07659	-1.35046	-0.0233853	0.786354	0.749182	0.914899	3
ENSMUSG00000038860	1.18724	0.919743	0.167242	-0.760946	-0.0521776	-1.4611	2
ENSMUSG00000038831	1.04084	0.86294	0.485378	-0.0792014	-0.792911	-1.51704	2
ENSMUSG00000004105	1.11062	0.904497	0.480911	-0.208597	-1.31319	-0.974237	2
ENSMUSG00000068966	-0.202786	-0.137903	1.25168	0.363096	0.465148	-1.73924	4
ENSMUSG00000085742	-0.938831	-1.14586	-0.533974	0.657218	1.26786	0.693587	3
ENSMUSG00000026788	-0.975509	-1.38283	1.11684	0.790389	0.510491	-0.0593841	3
ENSMUSG00000038765	-0.741106	-0.82983	1.29058	1.15235	-0.876707	0.00471387	4
ENSMUSG00000081244	-0.810536	-0.96676	0.286869	0.892397	1.3832	-0.785172	3
ENSMUSG00000038740	1.03863	0.826494	0.510543	-0.0139905	-0.873799	-1.48788	2
ENSMUSG00000103413	-0.520503	-0.760086	1.46851	1.07391	-0.781608	-0.480227	4
ENSMUSG00000038718	1.46634	-0.294764	0.332424	-0.982398	0.619915	-1.14152	2
ENSMUSG00000084908	-0.472859	-0.5878	-0.644291	-0.634878	1.83147	0.508357	3
ENSMUSG00000038696	1.2241	0.881378	0.245616	-0.15152	-0.766314	-1.43326	2
ENSMUSG00000081992	-1.35906	-1.1243	0.46111	0.797571	0.993293	0.231384	3
ENSMUSG00000087635	-1.63047	-0.280647	0.373197	0.821552	1.13019	-0.413819	3
ENSMUSG00000026867	1.13773	-1.14779	0.805714	0.589147	-0.227075	-1.15772	4
ENSMUSG00000026864	-1.61304	-0.664241	0.403994	0.82508	-0.00670983	1.05492	3
ENSMUSG00000070953	-0.793278	-1.42977	-0.273893	0.540692	0.827055	1.12919	3
ENSMUSG00000035949	-1.00115	-1.33659	0.69332	1.28804	0.241291	0.115094	3
ENSMUSG00000107167	-0.559425	-0.715319	1.01626	1.52341	-0.736828	-0.528099	4
ENSMUSG00000026869	-1.76362	0.0318684	0.799074	0.0193581	-0.188566	1.10189	3
ENSMUSG00000026870	-0.529442	-0.630975	1.69756	-0.646176	-0.658352	0.767386	4
ENSMUSG00000026873	1.18144	0.843528	-0.274552	0.0488778	-1.67301	-0.126285	2
ENSMUSG00000026875	1.04755	0.973409	0.444317	-0.124313	-1.20371	-1.13725	2
ENSMUSG00000026874	1.24004	1.29279	-0.549932	-0.957854	-0.663732	-0.361312	2
ENSMUSG00000057110	1.34101	1.03051	-0.204427	-1.04725	-0.992468	-0.127382	2
ENSMUSG00000026878	1.21325	1.26149	-0.159166	-0.941353	-0.888281	-0.485941	2
ENSMUSG00000026879	0.190998	0.196699	-0.616179	-0.452777	-1.09256	1.77382	1
[truncated: 22,889 more rows]
