# Supplementary material for: Obox4 promotes zygotic genome activation upon loss of Dux
Source: eLife. 2024 Jun 24;13:e95856. doi: 10.7554/eLife.95856 (PMC11196112; doi:10.7554/eLife.95856)
Supplement: Supplementary file 2. [file elife-95856-supp2.xlsx]

## Sheet: DE TE Obox4 induced
# Supplementary Table 2
# Transposable element expression in mESCs Obox4 induced versus non induced
name	baseMean	log2FoldChange	lfcSE	pvalue	padj	family
L1_Mus3	17452	-0.00543637	0.0321077	0.56348	0.99737	L1
L1Md_F	1513.99	-0.00504025	0.0327225	0.653405	0.99737	L1
L1_Rod	2944	-0.0105858	0.0353437	0.612312	0.99737	L1
Lx9	14226.5	-0.00709708	0.0313728	0.615438	0.99737	L1
L1M4	7453.63	-0.00686455	0.0336326	0.907222	0.99737	L1
L1_Mur2	4735.93	0.000971332	0.0333729	0.909712	0.99737	L1
RLTR26B_MM	139.552	0.008818	0.0355933	0.158841	0.99737	ERVK
RLTR25A	764.248	0.00875663	0.0338884	0.438316	0.99737	ERVK
L1M2	5846.68	-0.00427226	0.0334806	0.621911	0.99737	L1
B3	144069	0.00931418	0.0316941	0.591431	0.99737	B2
L1VL1	1217.03	-0.0135204	0.0372963	0.228197	0.99737	L1
L1Md_F2	27232.4	0.00137924	0.0312489	0.918382	0.99737	L1
ERVB7_1-LTR_MM	5627.91	-0.00935598	0.0362262	0.0311973	0.582173	ERVK
L1MEf	1184	-0.00305189	0.0328004	0.78568	0.99737	L1
RLTR14	932.152	0.00314965	0.031995	0.796892	0.99737	ERV1
RMER17A	456.646	-0.000562931	0.033982	0.925408	0.99737	ERVK
RLTR13E	697.595	0.00583345	0.0337333	0.529007	0.99737	ERVK
Lx2	4362.25	0.00474466	0.0321881	0.84811	0.99737	L1
IAPLTR1a_Mm	323.914	0.00584422	0.0339718	0.50955	0.99737	ERVK
ERVB7_3-LTR_MM	251.457	0.00433055	0.0345822	0.360736	0.99737	ERVK
ID_B1	83250.5	-0.00367562	0.0314555	0.781809	0.99737	B4
L1Md_A	32216	-0.0535765	0.11605	0.0120349	0.456913	L1
RLTR1D	169.524	-0.0095647	0.0357753	0.163093	0.99737	ERV1
MER44D	403.856	-0.00461464	0.0333453	0.642746	0.99737	TcMar-Tigger
Tigger7	3351.96	-0.00647007	0.0321357	0.624576	0.99737	TcMar-Tigger
RLTR13C1	204.173	-0.0134557	0.0371105	0.13508	0.99737	ERVK
MER74B	124.457	-0.00810837	0.0351732	0.239676	0.99737	ERVL
ID4_	17058.6	-0.0218815	0.0378787	0.211845	0.99737	ID
MLT1A1	2511.99	-0.000263873	0.0315612	0.983755	0.99737	ERVL-MaLR
Lx4B	2519.83	-0.009214	0.0338512	0.491007	0.99737	L1
B4A	64552.1	-0.00431214	0.0305763	0.766599	0.99737	B4
BGLII_Mur	316.382	-0.0139026	0.0368961	0.169349	0.99737	ERVK
L1_Mur3	8764.89	0.0025317	0.0331264	0.79459	0.99737	L1
B2_Mm2	82869.9	-0.00593927	0.0327788	0.614183	0.99737	B2
B1_Mus1	71947.4	0.000724617	0.0320911	0.366594	0.99737	Alu
Lx7	12044.2	-0.00407685	0.0320703	0.747491	0.99737	L1
ERVB4_2-LTR_MM	210.408	0.00754871	0.0354819	0.0774646	0.879263	ERVK
RLTR45-int	4215.02	0.291756	0.189624	0.00279605	0.192403	ERVK
PB1D10	49275.2	-0.0101444	0.0321801	0.27325	0.99737	Alu
ORR1E	8625.27	0.00308552	0.0318735	0.459566	0.99737	ERVL-MaLR
PB1D11	13669.1	-0.014454	0.0343872	0.368027	0.99737	Alu
RLTR9D2	97.128	0.00696406	0.0350451	0.225465	0.99737	ERVK
B2_Mm1t	29059.4	0.00198844	0.0336475	0.859908	0.99737	B2
Charlie2b	339.229	-0.000306568	0.0335892	0.972906	0.99737	hAT-Charlie
Lx8	20418.4	-0.00669476	0.0319693	0.854954	0.99737	L1
ORR1F	9486.47	0.00435437	0.0315953	0.74382	0.99737	ERVL-MaLR
RSINE1	94519.4	0.00131865	0.0321253	0.912232	0.99737	B4
MTEa	7548.2	0.00330774	0.0319291	0.7223	0.99737	ERVL-MaLR
B1F	34430.5	-0.0212273	0.0372944	0.339433	0.99737	Alu
MT2_Mm	6092.7	1.23878	0.164719	2.57963e-15	2.84017e-12	ERVL
L1_Mur1	1810	0.00642321	0.0342845	0.532527	0.99737	L1
RMER4B	3363.53	-0.012614	0.0335024	0.374991	0.99737	ERVK
RLTR10D	346.616	0.00962439	0.0357704	0.143131	0.99737	ERVK
Lx	7643.68	-0.00228102	0.0312226	0.852884	0.99737	L1
Lx10	1953.31	0.00128913	0.0316371	0.943063	0.99737	L1
MER119	284.289	0.00227688	0.0337273	0.765662	0.99737	hAT-Charlie
B1_Mm	29191.1	-0.00117629	0.0326011	0.479988	0.99737	Alu
L1Md_T	34900.5	-0.00921451	0.0335784	0.396364	0.99737	L1
L2a	13808.8	-0.0131715	0.0354034	0.252051	0.99737	L2
MTD	27124.1	-0.0036995	0.0309065	0.789628	0.99737	ERVL-MaLR
MTC	15834.4	-0.00567156	0.0307709	0.702283	0.99737	ERVL-MaLR
L1M5	6807.66	0.000151361	0.0327811	0.986693	0.99737	L1
B1F2	14604.8	-0.0140114	0.0341	0.337151	0.99737	Alu
L1MC	2580.11	-0.0048334	0.0338426	0.568904	0.99737	L1
L1MEg	2027.8	0.0157339	0.0363024	0.252679	0.99737	L1
Lx5b	1819.26	0.000925401	0.0322965	0.90778	0.99737	L1
L1MB7	5535.44	-0.00387952	0.0317915	0.757042	0.99737	L1
B3A	68980.3	-0.00915055	0.0312605	0.545187	0.99737	B2
RMER15	10285.3	0.00432232	0.0328097	0.858972	0.99737	ERVL
RLTR20B4_MM	130.511	0.000911451	0.0339882	0.848814	0.99737	ERVK
B1F1	15703	-0.0183794	0.0353502	0.398591	0.99737	Alu
MLT1A	1528.65	0.00689225	0.0338776	0.497537	0.99737	ERVL-MaLR
RLTRETN_Mm	1708.38	-0.0124517	0.0374633	0.0262279	0.553344	ERVK
RMER1B	3352.44	0.00430668	0.0323834	0.686003	0.99737	Other
L1_Mus1	14194.5	-0.00940788	0.0323653	0.682518	0.99737	L1
Lx3A	1556.18	0.000303923	0.03282	0.952656	0.99737	L1
MLT1B	3418.12	-0.00147046	0.0316666	0.915615	0.99737	ERVL-MaLR
MTB	4312.6	-0.00395863	0.031132	0.775518	0.99737	ERVL-MaLR
MLT1C	2920.65	0.0146753	0.0356893	0.282608	0.99737	ERVL-MaLR
L1_Mm	22705.3	0.000668216	0.0344695	0.732219	0.99737	L1
IAPEY2_LTR	200.046	0.00211466	0.033666	0.782472	0.99737	ERVK
IAPEy-int	204.968	0.567747	0.187523	8.48936e-05	0.00934678	ERVK
ERVB4_1B-I_MM-int	548.125	0.156146	0.34643	0.00726254	0.347655	ERVK
RMER16A3	185.769	0.0118619	0.0367552	0.100646	0.99737	ERVK
IAPEY3_LTR	144.283	-0.00398719	0.0340053	0.591461	0.99737	ERVK
L1Md_Gf	1410.85	-0.00732435	0.0337396	0.457873	0.99737	L1
MMETn-int	76544.8	-0.382569	0.307304	0.00344387	0.21065	ERVK
ERVB4_1C-LTR_Mm	3089.96	-0.00559272	0.0350543	0.069822	0.873991	ERVK
ETnERV-int	19247.2	-0.0104582	0.0366548	0.0142904	0.487254	ERVK
MLT1D	3109.46	0.0101695	0.0343689	0.383593	0.99737	ERVL-MaLR
L4_C_Mam	246.878	0.00384135	0.0338078	0.635836	0.99737	RTE-X
MER45C	24.9624	0.00175746	0.0344507	0.554595	0.99737	hAT-Tip100
L1VL4	2393.07	0.0027996	0.0339389	0.708619	0.99737	L1
L1_Mus4	3608.2	-0.001251	0.0329373	0.941052	0.99737	L1
RLTR6B_Mm	225.066	0.00289671	0.0341426	0.619296	0.99737	ERV1
L1MA4A	942.692	0.00637822	0.0332364	0.593881	0.99737	L1
L1MB3	3236.73	-0.0132844	0.0349716	0.254605	0.99737	L1
Lx8b	6192.14	-0.00646266	0.032606	0.611359	0.99737	L1
RMER17A2	495.874	0.000654647	0.0339814	0.914285	0.99737	ERVK
LTR81B	15.6765	0.00140247	0.0344449	0.610295	0.99737	Gypsy
MusHAL1	1252.23	-0.00745669	0.0342111	0.415244	0.99737	L1
ORR1B1	9085.49	-0.00869845	0.0321465	0.899254	0.99737	ERVL-MaLR
Lx6	5462.85	-0.00394956	0.032462	0.708141	0.99737	L1
RLTR13A1	115.772	0.0115759	0.0367042	0.0892734	0.951541	ERVK
RLTR20B3	269.457	-0.00464951	0.0338307	0.583326	0.99737	ERVK
MIRb	23383.6	0.00368482	0.0301885	0.803173	0.99737	MIR
RMER12C	1109.36	-0.00394782	0.0322253	0.743899	0.99737	ERVK
L1MC4	4665.36	-0.0152192	0.0366117	0.195583	0.99737	L1
HAL1ME	304.99	-0.0115955	0.0361991	0.176187	0.99737	L1
MER58B	2026.02	-0.00590814	0.0321731	0.638437	0.99737	hAT-Charlie
RLTR9A3	213.294	-0.00245614	0.0336323	0.758348	0.99737	ERVK
RMER16-int	5890.03	-0.349418	0.250542	0.00302607	0.195982	ERVK
MMERVK9E_I-int	3032.31	0.528509	0.106017	2.7312e-08	5.01175e-06	ERVK
RLTR6-int	1450.17	0.0187594	0.0403088	0.0826372	0.927349	ERV1
ORR1G	1877.72	-0.000840299	0.0325854	0.900136	0.99737	ERVL-MaLR
RMER1A	2888.84	-0.00258901	0.0337043	0.738757	0.99737	Other
L2b	6944.54	-0.00495295	0.0316193	0.697537	0.99737	L2
L1M3	2521.68	0.000254067	0.0324483	0.983095	0.99737	L1
URR1A	11959.5	-0.00750705	0.0310751	0.461188	0.99737	hAT-Charlie
ERVB7_4-LTR_MM	75.6913	0.00330017	0.0343552	0.517618	0.99737	ERVK
L2	9773.37	-0.0114695	0.0352652	0.283066	0.99737	L2
L1MC2	849.779	0.000692363	0.0327362	0.95016	0.99737	L1
RLTR13G	4404.28	-0.00575293	0.0350972	0.053127	0.777469	ERVK
Lx4A	2788.94	-0.00421878	0.0322225	0.729962	0.99737	L1
L1MC1	2552.87	-0.0108787	0.034467	0.356481	0.99737	L1
MTE2a	7398.1	0.00739303	0.0310183	0.630478	0.99737	ERVL-MaLR
MLT2B4	446.795	0.00875272	0.0348352	0.32458	0.99737	ERVL
L1MD	1981.64	-0.00538473	0.0338084	0.556274	0.99737	L1
Lx3C	1306.12	0.00501903	0.0329842	0.709876	0.99737	L1
L4_B_Mam	129.401	-0.0067218	0.0348866	0.280638	0.99737	RTE-X
MER5A	4174.52	0.000311142	0.0310103	0.982476	0.99737	hAT-Charlie
MER3	2049.38	0.000476701	0.0313985	0.981226	0.99737	hAT-Charlie
IMPB_01	3348.41	-0.0102623	0.0357	0.208622	0.99737	Satellite
MER2	5948.8	-0.00812617	0.0319856	0.547917	0.99737	TcMar-Tigger
L1M4a1	238.99	0.00670788	0.0344206	0.384444	0.99737	L1
L1MA4	2294.17	-0.00156836	0.0325516	0.854717	0.99737	L1
RLTR51A_Mm	478.383	-0.00877249	0.0352392	0.25068	0.99737	ERVK?
PB1D7	22604.5	-0.0119505	0.0335886	0.388705	0.99737	Alu
UCON12	7.07658	0.00354433	0.0347364	0.0605481	0.823005	Unknown
L1MEd	1246.4	0.00901747	0.0350973	0.170836	0.99737	L1
MIR3	8810.85	-0.000555279	0.0311761	0.96731	0.99737	MIR
L1_Mus2	6631.82	-0.0254052	0.0446681	0.888561	0.99737	L1
MMERVK9C_I-int	6328.34	0.0111557	0.0363271	0.135504	0.99737	ERVK
Lx3B	1835.6	0.00148233	0.0328131	0.893681	0.99737	L1
MIR	21592.4	-0.00668307	0.0306407	0.613165	0.99737	MIR
RLTR20C1_MM	908.804	-0.0382245	0.0673573	0.0170346	0.487254	ERVK
MIRc	12064.3	0.00374611	0.0309681	0.861392	0.99737	MIR
B1_Mur4	34152.5	-0.0129776	0.0336061	0.274496	0.99737	Alu
MER5B	3045.63	-0.00762513	0.0333279	0.519509	0.99737	hAT-Charlie
L1MA6	2273.67	-0.0179179	0.0380165	0.169019	0.99737	L1
Charlie1	1193.85	-0.00380911	0.0333891	0.608392	0.99737	hAT-Charlie
MLT1A0	3865.92	0.00125091	0.0319115	0.931091	0.99737	ERVL-MaLR
B1_Mus2	62432.9	-0.0230469	0.0400854	0.13979	0.99737	Alu
Tigger18a	165.293	-0.00630194	0.0344087	0.421003	0.99737	TcMar-Tigger
L1MC5a	1503.59	-0.00735241	0.0339914	0.46013	0.99737	L1
L1Md_F3	6455.93	-0.0127645	0.0351516	0.362896	0.99737	L1
L1M4b	850.674	0.00238741	0.0325569	0.871739	0.99737	L1
L1MA5	1500.82	-0.00655291	0.0333095	0.555496	0.99737	L1
L1ME3D	125.269	-0.00108686	0.0341075	0.811313	0.99737	L1
MER131	143.569	-0.00249102	0.0339734	0.706483	0.99737	SINE?
ID4	14957.6	-0.0119665	0.0333413	0.402194	0.99737	ID
MER5A1	1404.78	-0.0133188	0.03511	0.296515	0.99737	hAT-Charlie
RLTR17B_Mm	3871.35	-0.0024372	0.0323652	0.752477	0.99737	ERVK
RLTR13D4	125.819	-0.0111057	0.0364304	0.111935	0.99737	ERVK
HAL1M8	451.775	-0.00433127	0.0342321	0.536479	0.99737	L1
URR1B	11264.3	-0.0120095	0.0329681	0.452184	0.99737	hAT-Charlie
L2c	6315.36	-0.0045011	0.0317129	0.618387	0.99737	L2
RLTR45	517.41	0.00917149	0.0349924	0.309377	0.99737	ERVK
ORR1D2	7567.46	-0.000397847	0.030194	0.979033	0.99737	ERVL-MaLR
L1MC4a	1923.78	-0.00230882	0.0324459	0.823671	0.99737	L1
Lx3_Mus	2464.37	0.00409489	0.0330793	0.701525	0.99737	L1
MLT1J	1366.19	-0.0022031	0.0316974	0.852735	0.99737	ERVL-MaLR
L1MD1	942.822	-0.00812159	0.0342475	0.418673	0.99737	L1
UCON6	31.6627	0.00476739	0.0348002	0.200366	0.99737	Unknown
MLT1F	719.179	0.0019717	0.0328826	0.847845	0.99737	ERVL-MaLR
Zaphod	114.487	-0.00325231	0.0342609	0.561577	0.99737	hAT-Tip100
RLTR10C	893.014	0.00418802	0.0332066	0.676252	0.99737	ERVK
MER77B	403.947	-0.00853755	0.0347818	0.334296	0.99737	ERVL
MER89	368.911	0.0018151	0.0338801	0.786728	0.99737	ERV1
PB1	10130.9	-0.0101161	0.0322711	0.539286	0.99737	Alu
RLTR28B	259.366	-0.00852122	0.0354138	0.188301	0.99737	ERVL
X3_LINE	48.5114	0.00134512	0.0342752	0.738992	0.99737	RTE-BovB
Lx2A1	277.439	-0.00199166	0.0333031	0.823966	0.99737	L1
L3	4777.55	-0.0136606	0.0333377	0.304531	0.99737	CR1
MamGypLTR1c	41.7309	-0.00141681	0.0343094	0.727452	0.99737	Gypsy
MTE2b	5655.31	0.00170479	0.0316834	0.899002	0.99737	ERVL-MaLR
Charlie9	139.558	0.000210083	0.0338885	0.968627	0.99737	hAT-Charlie
MTA_Mm	14515.3	0.00678964	0.0329076	0.968752	0.99737	ERVL-MaLR
MLTR31FA_MM	293.779	-0.00542946	0.0345994	0.363341	0.99737	ERVK
MTC-int	2350.27	-0.0116751	0.0345834	0.337514	0.99737	ERVL-MaLR
MTD-int	2063.67	-0.0135793	0.0358296	0.257824	0.99737	ERVL-MaLR
MURVY-int	55.9444	-0.00426179	0.0345627	0.37179	0.99737	ERV1
MTE2b-int	240.333	0.00095346	0.0336371	0.904384	0.99737	ERVL-MaLR
RLTR27	170.072	0.00565994	0.0344628	0.411309	0.99737	ERVK
MT2B1	4533.88	0.0250712	0.0408049	0.151196	0.99737	ERVL
BGLII	1009.79	-0.012142	0.0371466	0.0518138	0.777469	ERVK
B1_Mur2	30020.1	-0.0166793	0.0356461	0.268275	0.99737	Alu
Lx5c	4676.11	-0.0180743	0.0377436	0.195396	0.99737	L1
L1MD3	1116.45	-0.0220573	0.0405563	0.131302	0.99737	L1
RMER17B	1223.46	-0.00495964	0.0342021	0.559392	0.99737	ERVK
RLTR13B4	160.461	0.00472505	0.0341357	0.527188	0.99737	ERVK
B1_Mur1	35518.7	-0.0153557	0.0349572	0.288509	0.99737	Alu
ORR1A3	2441.71	0.0155194	0.0356837	0.270574	0.99737	ERVL-MaLR
B4	33677.5	-0.0085984	0.0314071	0.561172	0.99737	B4
MER44C	124.154	-0.00596796	0.0346259	0.36903	0.99737	TcMar-Tigger
MTA_Mm-int	10575.1	-0.00146833	0.0339805	0.810041	0.99737	ERVL-MaLR
Lx5	4839.56	-0.00569272	0.0320415	0.617742	0.99737	L1
L1ME4a	788.471	0.00285033	0.0336809	0.732134	0.99737	L1
L1MB8	4399.5	-0.000949041	0.0320032	0.931599	0.99737	L1
RMER13A2	909.458	0.00898666	0.0343015	0.391953	0.99737	ERVK
ORR1D1	11187.3	-0.00823125	0.0314943	0.575454	0.99737	ERVL-MaLR
RLTR20C2_MM	795.789	0.000145204	0.0331643	0.988638	0.99737	ERVK
ORR1A2	9347.2	0.0111342	0.0342222	0.348494	0.99737	ERVL-MaLR
MER33	1876.78	-0.0197247	0.0398404	0.114665	0.99737	hAT-Charlie
RLTR16	499.335	-0.00620912	0.0344428	0.416161	0.99737	ERVK
UCON28a	9.24505	0.000607207	0.0344607	0.732469	0.99737	Unknown
YREP_Mm	291.378	-0.00655846	0.034427	0.410445	0.99737	Unknown
RMER20B	508.221	0.0133312	0.036082	0.229875	0.99737	ERVK
Tigger16a	141.468	-0.00567427	0.0344999	0.4014	0.99737	TcMar-Tigger
ORR1B1-int	3762.57	0.00690873	0.0337624	0.684425	0.99737	ERVL-MaLR
L1MC3	2282.26	0.00391129	0.0330676	0.708322	0.99737	L1
L1MD2	1509.47	-0.0029885	0.0331263	0.760357	0.99737	L1
RLTR15	1402.41	-0.00224448	0.0325726	0.835912	0.99737	ERVK
RLTR1D2_MM	322.171	0.00261752	0.0339749	0.676179	0.99737	ERV1
UCON26	24.2473	-0.0031365	0.0345945	0.290678	0.99737	Unknown
RMER6C	1334.82	0.0109587	0.0343386	0.422698	0.99737	ERVK
RLTR19B	154.182	0.000434082	0.0338399	0.950491	0.99737	ERVK
MER34A1	131.62	-0.00212297	0.0340456	0.727431	0.99737	ERV1
RLTR13D5	193.407	0.0054657	0.0341639	0.491742	0.99737	ERVK
L1MCa	1011.35	0.0030707	0.0335009	0.725995	0.99737	L1
RMER20A	702.585	-0.00595272	0.0340588	0.490026	0.99737	ERVK
RLTR14_RN	597.922	-0.00365541	0.0327789	0.736427	0.99737	ERV1
RMER13A	474.997	-0.000115337	0.0331287	0.988953	0.99737	ERVK
RLTR51B_Mm	143.719	0.00162077	0.0338895	0.806813	0.99737	ERVK?
RodERV21-int	641.922	0.00183888	0.0328128	0.857656	0.99737	ERV1
RLTR14-int	1316.83	0.183219	0.104557	0.00252258	0.185158	ERV1
MLT-int	286.992	-0.00117153	0.0336074	0.874992	0.99737	ERVL-MaLR
MTE-int	2576.65	-0.00086063	0.0318093	0.957208	0.99737	ERVL-MaLR
RLTR41	703.545	-0.00131167	0.0329876	0.888582	0.99737	ERV1
RMER10B	1430.72	-0.00383488	0.0337442	0.641166	0.99737	ERVL
MLTR11B	1449.64	0.0312276	0.051788	0.0392612	0.649754	ERVK
RMER4A	2104.49	-0.00913629	0.0338522	0.438907	0.99737	ERVK
RLTR25B	1140.92	-0.00562218	0.0323964	0.566002	0.99737	ERVK
RMER20C_Mm	509.57	0.00216525	0.0334876	0.799592	0.99737	ERVK
RLTR28	1249.91	-0.00528402	0.0343196	0.106785	0.99737	ERVL
LTR85c	18.1112	-0.000262091	0.0343888	0.927928	0.99737	Gypsy?
MamRep605	314.592	-0.00473323	0.0339946	0.549835	0.99737	LTR?
ORR1C2	6029.78	0.00283334	0.0308041	0.588956	0.99737	ERVL-MaLR
ERV3-16A3_I-int	125.419	0.00608993	0.0346821	0.342735	0.99737	ERVL
L1MB4	1441.63	-0.00574871	0.0334059	0.576162	0.99737	L1
LTR72_RN	285.528	-0.00141695	0.0331926	0.877267	0.99737	ERV1
Charlie5	680.56	0.0027419	0.0325927	0.779746	0.99737	hAT-Charlie
MER2B	675.862	-0.00710037	0.0338757	0.480867	0.99737	TcMar-Tigger
MYSERV16_I-int	1212.41	0.00359082	0.0335574	0.679351	0.99737	ERVK
RLTR20B2	325.364	-0.00656588	0.0347287	0.32896	0.99737	ERVK
LTR16B2	109.606	0.00349355	0.0342838	0.542792	0.99737	ERVL
MLTR25A	1883.56	-0.00657685	0.0339109	0.502147	0.99737	ERVK
Lx2B2	3886.44	-0.00669991	0.0342026	0.481053	0.99737	L1
RLTR20A3_MM	383.032	-0.00328172	0.0335841	0.70299	0.99737	ERVK
X7B_LINE	140.269	-0.00785751	0.0353779	0.164449	0.99737	CR1
RCHARR1	3829.45	-0.00102654	0.0326153	0.960357	0.99737	hAT-Charlie
MER92-int	109.206	0.00672678	0.0351143	0.180656	0.99737	ERV1
MER57-int	74.5538	-0.00445601	0.0347189	0.250887	0.99737	ERV1
RLTR9F	87.9943	0.00163458	0.034144	0.756185	0.99737	ERVK
L1MC5	2396.67	-0.00294813	0.0332314	0.793461	0.99737	L1
RLTR17	2448.6	-0.00268305	0.0339677	0.695774	0.99737	ERVK
RLTR16B_MM	571.431	-0.00497294	0.0342562	0.472297	0.99737	ERVK
Charlie13a	83.4436	0.0108746	0.036515	0.0764928	0.879263	hAT-Charlie
RMER5	3860.43	0.000282095	0.0306399	0.850905	0.99737	ERV1
MT2A	4054.59	0.0026371	0.0309511	0.853489	0.99737	ERVL
ERVL-B4-int	540.448	0.0174016	0.0392578	0.0295191	0.57268	ERVL
MERVL_2A-int	4905.92	0.251462	0.087093	0.000164876	0.0165026	ERVL
MurSatRep1	25741.2	0.000647275	0.0339265	0.919971	0.99737	Unknown
RLTR9E	3265.27	0.00244875	0.0344169	0.532838	0.99737	ERVK
Lx2B	1185.6	-0.00257589	0.0328293	0.803012	0.99737	L1
RMER17C2	472.635	-0.0131465	0.0372119	0.101903	0.99737	ERVK
MT2C_Mm	1600.49	0.00677227	0.0335472	0.531808	0.99737	ERVL
ORR1B2	4176.57	0.00388238	0.0312664	0.781347	0.99737	ERVL-MaLR
LTRIS2	3971.32	-0.0182689	0.0413889	0.00952324	0.374467	ERV1
MuRRS4-int	851.301	-0.00389647	0.0329285	0.519962	0.99737	ERV1
RMER17C	1738.07	-0.00809591	0.035387	0.175571	0.99737	ERVK
IAPLTR2b	365.591	0.0121439	0.036455	0.148493	0.99737	ERVK
Tigger6a	256.894	-0.00537299	0.0341716	0.493354	0.99737	TcMar-Tigger
LTR48	240.618	0.00693364	0.0344021	0.413832	0.99737	ERV1
L1ME3	712.322	0.0086747	0.0341866	0.396927	0.99737	L1
LTR16C	243.903	0.00851904	0.0353226	0.21718	0.99737	ERVL
Cheshire	892.252	-0.000718355	0.0329265	0.928753	0.99737	hAT-Charlie
MLT1E2	1065.78	-0.0199352	0.0404275	0.102857	0.99737	ERVL-MaLR
B1_Mur3	23576.5	-0.0126031	0.0334616	0.35057	0.99737	Alu
RLTR9D	956.326	0.00998298	0.0358955	0.13287	0.99737	ERVK
MLT2C2	216.818	0.0172159	0.04018	0.0287006	0.57268	ERVL
L1M3b	50.9816	0.00659963	0.0351948	0.117168	0.99737	L1
LTR80B	18.3252	-0.0011379	0.0343989	0.719894	0.99737	ERVL
MLT1G3	505.947	0.0239836	0.0455592	0.033359	0.597248	ERVL-MaLR
MER20	4414.68	-0.0155569	0.0348932	0.338287	0.99737	hAT-Charlie
RLTR22_Mur	1192.44	0.0198242	0.0388222	0.164027	0.99737	ERVK
RMER19B	4649.14	0.0239144	0.0400021	0.134958	0.99737	ERVK
ORR1C1	3869.46	-0.00169438	0.0311843	0.887779	0.99737	ERVL-MaLR
RMER10A	3243.11	-0.0202461	0.0421405	0.0223541	0.52216	ERVL
RLTR42-int	1180.18	0.0115013	0.0340142	0.371033	0.99737	ERVK
MYSERV6-int	2804.58	0.0027172	0.03322	0.882831	0.99737	ERVK
RMER17C-int	793.983	-9.95201e-05	0.0325449	0.979499	0.99737	ERVK
MLTR31A_MM	141.044	-0.00330609	0.0342672	0.55689	0.99737	ERVK
MLTR11A	1280.54	0.00996605	0.0348908	0.33806	0.99737	ERVK
MMAR1	463.709	-0.00202671	0.0335433	0.798281	0.99737	TcMar-Mariner
MLTR18_MM	317.941	0.0059081	0.0337974	0.529556	0.99737	ERVK
MT2B	3902.26	0.00772716	0.0318518	0.588108	0.99737	ERVL
LTR90A	35.1745	0.00352904	0.0345894	0.338424	0.99737	LTR
7SK	243.764	-0.00463998	0.0339344	0.555363	0.99737	RNA
L1M3de	118.709	-0.00410148	0.034319	0.496572	0.99737	L1
L1VL2	3963.7	-0.0139644	0.0358982	0.218955	0.99737	L1
RMER3D-int	798.454	0.00218144	0.0329415	0.829283	0.99737	ERVK
Tigger1	1123.21	0.00160977	0.0327997	0.875034	0.99737	TcMar-Tigger
L1MB1	763.799	-0.00448536	0.0331269	0.664759	0.99737	L1
MER52-int	40.3579	-0.000266005	0.0343076	0.942252	0.99737	ERV1
ORR1D1-int	1100.22	-0.00885344	0.0343334	0.403601	0.99737	ERVL-MaLR
RLTR21	1051.73	-0.00755259	0.0339427	0.456902	0.99737	ERVK
RLTR53B_Mm	36.3419	-0.00426198	0.0346645	0.289612	0.99737	ERVK
UCON4	65.8533	-0.00326134	0.0344001	0.502421	0.99737	Unknown
MER106B	105.176	-0.00259851	0.0340148	0.67529	0.99737	hAT-Charlie
LTR37A	160.715	0.00267937	0.033902	0.709288	0.99737	ERV1
MLTR32C_MM	89.7754	0.0122698	0.0371156	0.0661821	0.851086	ERVK
RLTR18	545.979	-0.00517069	0.0330168	0.636924	0.99737	ERVK
RLTR30	253.35	0.0111515	0.0362429	0.150735	0.99737	ERV1
BGLII_B	530.326	-0.00898222	0.0354734	0.209961	0.99737	ERVK
L1M4c	880.964	-0.0045537	0.0336922	0.606533	0.99737	L1
PB1D9	34226.4	-0.00762436	0.0332164	0.512031	0.99737	Alu
ORR1F-int	253.711	0.00222618	0.0335479	0.785342	0.99737	ERVL-MaLR
ETnERV2-int	1535.26	0.405603	0.154799	0.000283987	0.0240515	ERVK
RLTR1B	893.343	-0.000375495	0.0340149	0.951112	0.99737	ERV1
RLTR1B-int	23317.7	-0.0093326	0.0361805	0.0217855	0.52216	ERV1
MMERGLN-int	2342.93	0.0233351	0.0433914	0.0730447	0.879263	ERV1
L1MA10	203.171	0.00371949	0.0339221	0.625877	0.99737	L1
MER44B	1051.8	-0.00671248	0.0333602	0.602458	0.99737	TcMar-Tigger
RMER21B	453.139	0.00346247	0.0332746	0.684887	0.99737	ERV1
L1ME1	2791.44	-0.00262652	0.0326756	0.79619	0.99737	L1
L1MA7	1237.32	-0.00686475	0.0336498	0.508299	0.99737	L1
ORR1C1-int	387.339	0.00284915	0.0332847	0.745005	0.99737	ERVL-MaLR
ID2	3445.35	-0.0224536	0.039144	0.175666	0.99737	ID
L1MDa	1147.05	-0.00792408	0.0335735	0.483786	0.99737	L1
LTR78B	123.214	-0.000593751	0.0340082	0.917811	0.99737	ERV1
RLTR13B2	508.29	-0.778956	0.148922	6.9062e-09	1.52075e-06	ERVK
MLT1K	1323.33	0.00571473	0.0328481	0.621875	0.99737	ERVL-MaLR
Charlie1a	2406.5	-0.00490409	0.0336722	0.617128	0.99737	hAT-Charlie
RMER19C	1047.87	0.0261665	0.0458525	0.0604857	0.823005	ERVK
L1ME3A	880.902	0.00372785	0.0333591	0.688447	0.99737	L1
IAPLTR2_Mm	632.966	0.0165793	0.0382717	0.111882	0.99737	ERVK
IAPEz-int	11586.5	-0.00406763	0.034209	0.546433	0.99737	ERVK
IAPEY4_I-int	1337.49	0.764097	0.143347	4.10388e-09	1.30529e-06	ERVK
L1M1	173.758	0.00803749	0.03487	0.317421	0.99737	L1
Plat_L3	164.466	-0.00704371	0.0348967	0.283534	0.99737	CR1
B2_Mm1a	29458.2	0.0032947	0.0342264	0.575865	0.99737	B2
L1MB2	1764.63	-0.00809763	0.0336551	0.472499	0.99737	L1
RMER17D2	197.881	-0.00384551	0.034243	0.535955	0.99737	ERVK
Tigger17a	883.484	-0.0177281	0.0386647	0.13115	0.99737	TcMar-Tigger
ORR1A4	4550.44	0.0113626	0.0332086	0.438195	0.99737	ERVL-MaLR
Tigger17c	390.969	-0.0166065	0.0385671	0.117501	0.99737	TcMar-Tigger
BGLII_B2	170.996	-0.00822206	0.0350899	0.268582	0.99737	ERVK
RLTR12B	783.14	-0.00773859	0.0339075	0.456699	0.99737	ERVK
MLTR14	3158.65	0.00290451	0.0316673	0.818595	0.99737	ERV1
RMER12	1373.65	-0.000509576	0.0321692	0.9881	0.99737	ERVK
RLTR41A2	154.273	0.0178898	0.0407496	0.0225537	0.52216	ERV1
MERV1_I-int	958.293	0.00253808	0.0326108	0.842825	0.99737	ERV1
L1ME3G	497.618	-0.0100779	0.0350532	0.311712	0.99737	L1
L1ME3B	315.489	-0.00368392	0.033716	0.656751	0.99737	L1
Kanga1a	81.0896	0.0071621	0.0350973	0.217303	0.99737	TcMar-Tc2
RLTR31D_MM	1434.65	-0.00869372	0.0344019	0.380948	0.99737	ERVK
Kanga1c	80.7171	-0.00267783	0.0343181	0.579452	0.99737	TcMar-Tc2
LTR16A	381.418	0.0040356	0.0333903	0.66057	0.99737	ERVL
Tigger5	868.28	-0.0102383	0.034247	0.342504	0.99737	TcMar-Tigger
RLTR10A	195.966	0.00455109	0.0343141	0.479615	0.99737	ERVK
MuLV-int	102.076	0.0016216	0.0340226	0.788216	0.99737	ERV1
MLT1L	597.551	0.00664843	0.0341443	0.430788	0.99737	ERVL-MaLR
RMER6D	665.311	-0.0112231	0.0353686	0.268847	0.99737	ERVK
LTR40b	321.313	0.0103107	0.0354372	0.254167	0.99737	ERVL
RLTR20A4	2051.84	-0.010192	0.0341677	0.207203	0.99737	ERVK
ORR1A0	2386.93	7.47542e-05	0.0336768	0.992097	0.99737	ERVL-MaLR
LTR10_RN	291.142	-0.00360212	0.0336829	0.669738	0.99737	ERVK
RLTR13C2	633.819	-0.00977426	0.0342609	0.389284	0.99737	ERVK
ID	3800.67	-0.0173068	0.0359136	0.339975	0.99737	ID
RLTR19	523.792	0.0144604	0.0368754	0.178596	0.99737	ERVK
L1MB5	2602.83	-0.00267064	0.0326902	0.813025	0.99737	L1
RMER1C	1311.01	0.00600101	0.0331181	0.591406	0.99737	Other
RLTR42	102.775	4.97973e-05	0.0340636	0.971822	0.99737	ERVK
MER46C	532.144	-0.00516245	0.0336621	0.582039	0.99737	TcMar-Tigger
Kanga1b	57.7219	-0.000265235	0.0342402	0.951156	0.99737	TcMar-Tc2
RMER6B	935.008	0.00323298	0.0332062	0.74183	0.99737	ERVK
Charlie4	73.1856	0.00226424	0.0342458	0.679235	0.99737	hAT-Charlie
Charlie19a	184.5	-0.00810683	0.0351518	0.239169	0.99737	hAT-Charlie
RMER6A	5193.44	-0.015489	0.0372924	0.173441	0.99737	ERVK
CYRA11_Mm	185.152	-0.00806099	0.0348799	0.319901	0.99737	Y-chromosome
RLTR48A	495.374	0.0278318	0.0497358	0.026147	0.553344	ERV1
RMER13B	1543.39	-0.0122437	0.0353489	0.414041	0.99737	ERVK
L1ME3E	154.128	-0.0064657	0.0344514	0.405091	0.99737	L1
MMERGLN_LTR	287.682	0.00793962	0.0355022	0.111747	0.99737	ERV1
RLTR1A2_MM	350.51	0.00814359	0.0344035	0.393911	0.99737	ERV1
RLTR12BD_Mm	671.771	0.00712462	0.0332117	0.53549	0.99737	ERVK
Helitron1Nb_Mam	59.229	0.0101913	0.0365816	0.00857881	0.359679	Helitron
RLTR10B2	163.539	0.00990369	0.0358058	0.171281	0.99737	ERVK
RLTR10-int	1378.31	0.00185537	0.0336099	0.854458	0.99737	ERVK
IAP-d-int	1257.31	0.0379487	0.0660072	0.0182906	0.487254	ERVK
IAPEY3-int	750.106	0.00610561	0.0341565	0.469815	0.99737	ERVK
RLTR18B	904.06	-0.00559945	0.032709	0.615663	0.99737	ERVK
MER68B	326.442	0.000125873	0.033323	0.987655	0.99737	ERVL
L1M4a2	247.295	-0.000391835	0.0337895	0.954617	0.99737	L1
MMERVK10D3_I-int	381.367	0.407619	0.160706	0.000354527	0.027881	ERVK
MMERVK10C-int	3612.97	0.0193491	0.0392295	0.131223	0.99737	ERVK
BGLII_A	140.028	-0.00256905	0.0341646	0.650419	0.99737	ERVK
RLTR34C_MM	175.118	-0.00416999	0.0345074	0.41778	0.99737	ERVK
ORR1D2-int	545.117	-0.00802279	0.0344602	0.371687	0.99737	ERVL-MaLR
MLTR12	349.991	0.000297015	0.0332846	0.972942	0.99737	ERV1
RLTR1E_MM	14.9561	-0.00201004	0.0344873	0.461293	0.99737	ERV1
L1MEc	1889.03	-0.00836533	0.0339402	0.412853	0.99737	L1
RLTR20B3A_MM	315.766	-0.000538615	0.0339011	0.910491	0.99737	ERVK
RMER17B2	565.896	0.00341754	0.0337101	0.67394	0.99737	ERVK
MamRep137	221.773	0.00388785	0.0338321	0.626983	0.99737	TcMar-Tigger
LTR108c_Mam	1.50902	0.000465876	0.0345098	0.517877	0.99737	ERVL
RLTR30E_MM	447.678	-0.00389561	0.0342983	0.512253	0.99737	ERV1
Looper	193.851	0.002329	0.0337803	0.755538	0.99737	PiggyBac
LTR50	402.715	0.00045989	0.0341424	0.923529	0.99737	ERVL
RLTR24B_MM	302.239	-0.00757062	0.0342615	0.42461	0.99737	ERV1
Tigger5b	798.642	0.00264409	0.0329701	0.7602	0.99737	TcMar-Tigger
MER47B	192.889	-0.00509213	0.0339729	0.545886	0.99737	TcMar-Tigger
RMER15-int	1486.09	-0.00842341	0.0331737	0.49756	0.99737	ERVL
ORR1A3-int	1169.54	0.000251208	0.0324706	0.974537	0.99737	ERVL-MaLR
Lx2A	250.056	0.00457534	0.0337583	0.617943	0.99737	L1
RMER2	728.029	0.000612649	0.0325782	0.95701	0.99737	ERV1
MurERV4-int	1617.2	-0.00298102	0.0331764	0.753916	0.99737	ERVK
RLTR1	5.06681	0.000263156	0.0344852	0.853101	0.99737	ERV1
RLTR40	1639.64	-0.00268951	0.0328318	0.801226	0.99737	ERVK
RMER19A	1120.79	0.00845556	0.0330673	0.476801	0.99737	ERVK
RMER13A1	836.061	0.0125092	0.0350551	0.309812	0.99737	ERVK
AmnSINE2	137.063	-0.0052183	0.0344087	0.431431	0.99737	Deu
MER65D	48.4339	-0.00379331	0.0345264	0.390513	0.99737	ERV1
RLTR16C_MM	472.702	-0.00700518	0.0350958	0.209769	0.99737	ERVK
MamGypLTR2c	8.03627	-0.00189097	0.0345292	0.351697	0.99737	Gypsy
RLTR9A3B	57.1923	0.00400906	0.0345239	0.401477	0.99737	ERVK
MERVL-int	25658.2	1.63355	0.307664	4.7422e-09	1.30529e-06	ERVL
RMER12B	506.832	0.0187995	0.0410126	0.0368572	0.634059	ERVK
MLT1F2	829.251	0.00313111	0.0330599	0.749515	0.99737	ERVL-MaLR
ERVB7_2-LTR_MM	124.296	-0.00790819	0.0353265	0.181799	0.99737	ERVK
L1MEi	105.36	0.00250966	0.0340737	0.683857	0.99737	L1
MER68	849.259	-0.0106907	0.0340795	0.391019	0.99737	ERVL
MLT2D	347.643	-0.0021369	0.03335	0.81022	0.99737	ERVL
MERV1_LTR	581.291	0.010233	0.0360066	0.170786	0.99737	ERV1
RLTR13A	227.306	-0.015569	0.0390909	0.0307738	0.582173	ERVK
RMER19B2	1463.62	-0.0262287	0.047347	0.0381558	0.646301	ERVK
ORR1A0-int	3387.77	-0.000912661	0.0342893	0.836482	0.99737	ERVL-MaLR
RLTR50B	76.2327	-0.00374997	0.0344323	0.46597	0.99737	ERVK
RLTR10F	271.692	0.00388122	0.0343346	0.507705	0.99737	ERVK
ORR1E-int	1109.47	0.000393744	0.0326338	0.951902	0.99737	ERVL-MaLR
RMER17D	632.758	-0.010967	0.0362901	0.129921	0.99737	ERVK
MLT1J1	380.838	-0.00171416	0.0334826	0.841577	0.99737	ERVL-MaLR
MT2B2	1614.84	0.0537821	0.0906386	0.0235029	0.528095	ERVL
MLTR18D_MM	446.851	0.0159852	0.0377419	0.152675	0.99737	ERVK
RLTR11A2	1836.82	-0.0230856	0.0422089	0.0905478	0.951541	ERVK
RLTR11A	2075	-0.00739448	0.0345551	0.375546	0.99737	ERVK
RLTR44B	39.2842	0.00416329	0.034652	0.29658	0.99737	ERVK
RLTR44-int	220.199	0.0167665	0.0398574	0.0296483	0.57268	ERVK
IAP1-MM_I-int	289.536	0.0178512	0.0409506	0.0125616	0.461011	ERVK
RLTR44A	66.5835	0.00741516	0.0354165	0.0943456	0.97079	ERVK
IAP1-MM_LTR	76.2967	-0.0019388	0.034181	0.717551	0.99737	ERVK
MER74A	246.799	0.00996697	0.0352974	0.0768032	0.879263	ERVL
RLTR26	78.7432	0.010595	0.0364716	0.0624968	0.829024	ERVK
MYSERV-int	600.236	0.00319081	0.0334867	0.720465	0.99737	ERVK
MER21C	1550.13	0.00454182	0.0322313	0.712014	0.99737	ERVL
MLT2B1	390.865	0.0151156	0.0376604	0.145406	0.99737	ERVL
MER54A	131.49	0.000126536	0.0338828	0.965798	0.99737	ERVL
MER34	224.241	-0.00245361	0.0338483	0.733238	0.99737	ERV1
RLTR9A3A	43.694	0.00883648	0.0359473	0.03954	0.649754	ERVK
RLTR1C	358.773	0.00908058	0.0348609	0.445164	0.99737	ERV1
MTEb	4467.03	0.00291479	0.0311093	0.523109	0.99737	ERVL-MaLR
RLTR9B2	59.2169	0.00645193	0.035067	0.180962	0.99737	ERVK
RLTR9C	68.1674	-0.00405746	0.034461	0.405961	0.99737	ERVK
UCON15	1.6087	0.000977364	0.0345263	0.178498	0.99737	Unknown
MTB_Mm	2894.66	0.00166751	0.0322136	0.850694	0.99737	ERVL-MaLR
RMER21A	547.35	0.0174664	0.0389052	0.118948	0.99737	ERV1
IAPLTR2a2_Mm	318.572	-3.96604e-05	0.0336675	0.995368	0.998088	ERVK
L1MA9	1436.63	-0.0125471	0.0347047	0.33865	0.99737	L1
RMER6BA	480.388	0.0194574	0.0420853	0.0163251	0.487254	ERVK
ORR1A2-int	4796.87	0.0175276	0.040323	0.0321344	0.589666	ERVL-MaLR
L1ME2z	710.859	-0.00320767	0.0332917	0.73281	0.99737	L1
RLTR20B1	728.269	-0.0270335	0.0488784	0.0276533	0.563821	ERVK
LTR55	46.8788	0.00346897	0.0344732	0.440394	0.99737	ERVL?
MLT1O	182.173	0.00843933	0.0350118	0.297201	0.99737	ERVL-MaLR
RLTR23	796.529	0.00165374	0.0323998	0.882777	0.99737	ERV1
L1ME4b	914.252	0.00531707	0.0333367	0.610081	0.99737	L1
RLTR18-int	309.792	-0.0019533	0.0337198	0.808596	0.99737	ERVK
LTR29	5.59269	-0.00100558	0.034498	0.527778	0.99737	ERV1
MLTR18A_MM	490.685	-0.000864334	0.0338484	0.90134	0.99737	ERVK
RLTR26_Mus	716.529	0.887253	0.155085	4.76613e-10	2.62375e-07	ERVK
RLTR12A	465.532	-0.00703082	0.0344464	0.401411	0.99737	ERVK
MLT1E1A	430.122	0.00568662	0.0337164	0.549805	0.99737	ERVL-MaLR
MER34A	240.621	-0.0110823	0.0358887	0.205887	0.99737	ERV1
ORR1A4-int	3202.29	0.000198612	0.0337903	0.99848	0.999294	ERVL-MaLR
L1P5	29.9538	-0.00508566	0.0348646	0.171639	0.99737	L1
MLTR18C_MM	311.401	0.00103791	0.0332216	0.909648	0.99737	ERVK
IAPLTR4	238.557	0.0124976	0.0372931	0.0639178	0.83778	ERVK
MLTR31F_MM	181.263	0.00536508	0.034496	0.404487	0.99737	ERVK
Ricksha_c	122.008	0.000460888	0.0340723	0.932538	0.99737	MULE-MuDR
RLTR9A2	140.738	0.000625633	0.0340945	0.911587	0.99737	ERVK
RLTR30D2_MM	458.312	-0.0212927	0.0423594	0.0550933	0.787763	ERV1
Charlie4a	555.142	-0.00129815	0.0332121	0.88317	0.99737	hAT-Charlie
RLTR47	50.3096	-0.00482331	0.0346765	0.308731	0.99737	ERVK
RLTR31B2	829.407	-0.00736788	0.034075	0.477843	0.99737	ERVK
ORR1D-int	741.878	-0.0059425	0.0338375	0.524896	0.99737	ERVL-MaLR
RLTR20D	334.832	-0.0110893	0.0355641	0.255539	0.99737	ERVK
ERVB4_1B-LTR_MM	124.546	0.00508379	0.034617	0.350432	0.99737	ERVK
RLTR33	1032.75	0.0189077	0.0380083	0.141098	0.99737	ERVK
Charlie12	422.16	-0.0145714	0.0375724	0.282413	0.99737	hAT-Charlie
MLTR73	391.419	0.00643022	0.0336515	0.527674	0.99737	ERV1
LTRIS_Mus	894.666	-0.00518638	0.0333832	0.610041	0.99737	ERV1
MuRRS-int	349.492	0.00349156	0.0333006	0.711376	0.99737	ERV1
IAPLTR1_Mm	1383.8	-0.00634479	0.0345471	0.355021	0.99737	ERVK
RLTR4_MM-int	1225.94	-0.00133977	0.0335541	0.877459	0.99737	ERV1
L1ME3Cz	520.354	-0.0242141	0.0460416	0.0254784	0.553344	L1
MER21B	1675.39	0.000711526	0.0325008	0.953695	0.99737	ERVL
MER31B	811.386	-0.00131372	0.0339595	0.859357	0.99737	ERV1
ERVL-E-int	371.521	0.00965506	0.0353568	0.253193	0.99737	ERVL
RLTR9A	219.131	0.00824893	0.0349343	0.302952	0.99737	ERVK
MLT1H-int	73.1939	0.00141989	0.0342013	0.7773	0.99737	ERVL-MaLR
RLTR12H	121.281	-0.00370598	0.0342687	0.5333	0.99737	ERVK
ERVB7_2B-LTR_MM	162.646	0.00740762	0.0352224	0.184985	0.99737	ERVK
MER88	36.9866	0.00154476	0.0343448	0.688753	0.99737	ERVL
RLTR11C_MM	384.764	-0.0255311	0.047924	0.0177729	0.487254	ERVK
RLTR10D2	96.1947	0.00307579	0.0345115	0.410355	0.99737	ERVK
ORR1C2-int	734.945	-0.016999	0.0386384	0.118436	0.99737	ERVL-MaLR
RLTR34B_MM	425.167	-0.00322994	0.0343554	0.516247	0.99737	ERVK
RLTR13B1	1086.3	-0.0194537	0.0400331	0.102555	0.99737	ERVK
MER31A	236.283	-0.0108814	0.0357532	0.219706	0.99737	ERV1
MER57C2	113.919	0.00416141	0.0341441	0.536367	0.99737	ERV1
MER53	430.04	0.00337699	0.0337395	0.671494	0.99737	hAT
L1MA5A	566.752	-0.00595415	0.0341379	0.361877	0.99737	L1
MTEa-int	741.727	-0.0090176	0.0336888	0.427702	0.99737	ERVL-MaLR
UCON11	10.9385	0.00207466	0.0345448	0.309328	0.99737	Unknown
HAL1	1782.08	-0.00525016	0.0328822	0.628532	0.99737	L1
Arthur1	151.586	0.000941954	0.0338367	0.888623	0.99737	hAT-Tip100
ORR1B2-int	433.575	0.00480604	0.0337529	0.589484	0.99737	ERVL-MaLR
Tigger9b	322.137	-0.00656477	0.0341098	0.464134	0.99737	TcMar-Tigger
MLT1J2	353.874	0.00389174	0.0334312	0.673841	0.99737	ERVL-MaLR
MER121	60.6808	0.00153907	0.0342775	0.726696	0.99737	TcMar?
ERVB4_1-LTR_MM	4.80325	-0.00151552	0.0345343	0.280072	0.99737	ERVK
ORR1G-int	6.79275	0.0026654	0.0346174	0.15075	0.99737	ERVL-MaLR
RLTR17D_Mm	690.158	0.0044568	0.0335458	0.63539	0.99737	ERVK
L1MA8	1163.02	-0.00754889	0.0332171	0.559425	0.99737	L1
MLT1E3	334.077	0.005176	0.0339988	0.528758	0.99737	ERVL-MaLR
MLTR18B_MM	398.597	0.013579	0.0369432	0.160305	0.99737	ERVK
RLTR19-int	1639.93	0.00431163	0.0343725	0.475171	0.99737	ERVK
ORR1A1	2198.02	0.00877132	0.0333124	0.483869	0.99737	ERVL-MaLR
ORR1A1-int	1738.93	0.0210156	0.0425303	0.0462685	0.710978	ERVL-MaLR
RLTR10	495.013	-0.0035144	0.0343299	0.520031	0.99737	ERVK
L3b	930.323	-0.00596679	0.0331289	0.506849	0.99737	CR1
MARNA	331.491	0.00286255	0.0332727	0.76087	0.99737	TcMar-Mariner
MER44A	322.044	0.00745219	0.034869	0.307863	0.99737	TcMar-Tigger
MER110A	36.1724	-0.00152933	0.0344016	0.644232	0.99737	ERV1
MER92D	7.60374	0.000772102	0.0344652	0.698994	0.99737	ERV1
MER90	91.0109	-0.00123647	0.0341217	0.822485	0.99737	ERV1
RLTR13D6	444.833	-0.00502483	0.0337436	0.574398	0.99737	ERVK
MTB_Mm-int	257.911	-0.00416155	0.0339789	0.566285	0.99737	ERVL-MaLR
RLTR9B	82.4774	0.0183475	0.0414484	0.00878605	0.359679	ERVK
RMER16	290.972	-0.0121349	0.0364642	0.15769	0.99737	ERVK
ERVB2_1A-I_MM-int	276.509	-0.0023034	0.0335925	0.776918	0.99737	ERVK
MRLTR33	763.75	-0.0105375	0.0350705	0.303424	0.99737	ERVK
RLTR12D	422.786	-0.0120204	0.0360134	0.208497	0.99737	ERVK
RLTR12E	550.098	-0.00758581	0.034784	0.316729	0.99737	ERVK
LTRIS4A	248.875	0.0241608	0.0463958	0.0180538	0.487254	ERV1
LTR89	45.089	0.00167361	0.0343341	0.677707	0.99737	ERVL?
RLTR13A2	1162.84	-0.193571	0.142927	0.00405954	0.23524	ERVK
RLTR20A2B_MM	187.762	-0.00256138	0.0340179	0.683265	0.99737	ERVK
LTRIS4	90.9667	-0.000431656	0.0341596	0.930716	0.99737	ERV1
RLTR20B5_MM	278.215	7.09961e-05	0.033631	0.987188	0.99737	ERVK
MLT1E	226.966	-0.0097973	0.0355683	0.210153	0.99737	ERVL-MaLR
MER47A	40.455	0.0100073	0.0364287	0.0226492	0.52216	TcMar-Tigger
L1M2c	125.222	0.00240247	0.0341231	0.683163	0.99737	L1
MLT1-int	145.845	0.00886191	0.0356455	0.145432	0.99737	ERVL-MaLR
AmnSINE1	538.007	0.000408271	0.0329635	0.969234	0.99737	Deu
RLTR13A3	302.09	-0.00349499	0.0338638	0.644731	0.99737	ERVK
MER63D	262.738	0.00696492	0.0341738	0.443806	0.99737	hAT-Blackjack
RLTR31_Mm	85.8379	-0.00463542	0.0345354	0.389788	0.99737	ERVK
MMVL30-int	843.459	0.284526	0.105998	0.000262089	0.0240467	ERV1
RLTR43C	63.7182	0.00444163	0.0345257	0.39999	0.99737	ERVK
MERVK26-int	320.261	0.00359701	0.0337257	0.662863	0.99737	ERVK
RLTR31C_MM	377.705	-0.00970673	0.0356484	0.196545	0.99737	ERVK
L1ME2	1261.33	0.00708967	0.0331666	0.544942	0.99737	L1
MLTR25C	192.077	-0.00232142	0.0337116	0.762195	0.99737	ERVK
RLTR6C_Mm	10.8698	-0.000751954	0.0344335	0.73344	0.99737	ERV1
RLTR26D_MM	190.024	0.00116518	0.0336301	0.880366	0.99737	ERVK
RLTR13D3	315.798	0.0289093	0.051852	0.0185874	0.487254	ERVK
RMER17A-int	83.8136	-0.00130137	0.03422	0.782374	0.99737	ERVK
RLTR11D	291.037	-0.00194684	0.0335564	0.808169	0.99737	ERVK
BGLII_C	21.5272	-0.00288291	0.034564	0.328705	0.99737	ERVK
ETnERV3-int	4014.32	-1.17948	0.30478	3.98353e-06	0.000548233	ERVK
RLTR10B	73.1761	0.00360336	0.0343727	0.491056	0.99737	ERVK
RLTR31M	78.2508	0.00122894	0.0341847	0.803834	0.99737	ERVK
RLTR17C_Mm	71.3101	0.010659	0.0365341	0.0559765	0.79013	ERVK
RLTR13F	134.174	-0.00384427	0.0343153	0.513032	0.99737	ERVK
IAPEY3C_LTR	93.0994	0.0100414	0.0361579	0.0933621	0.969732	ERVK
Charlie7	257.25	0.000522365	0.0335831	0.9632	0.99737	hAT-Charlie
ERVB4_2-I_MM-int	470.036	0.00918839	0.03489	0.313324	0.99737	ERVK
IAPLTR3	43.9916	0.00182196	0.0343024	0.680029	0.99737	ERVK
IAPLTR3-int	624.888	0.0152905	0.0376973	0.136187	0.99737	ERVK
LTR104_Mam	36.6146	-0.000952287	0.0343492	0.785051	0.99737	Gypsy
MER45B	150.316	0.000161889	0.0339182	0.972448	0.99737	hAT-Tip100
L1MCb	144.342	0.00181745	0.0339722	0.787767	0.99737	L1
MTB-int	987.547	-0.00636854	0.0341261	0.467676	0.99737	ERVL-MaLR
RLTR34D_MM	101.187	0.00209594	0.0341382	0.709563	0.99737	ERVK
L1MEb	139.124	-0.00743375	0.0351229	0.22785	0.99737	L1
Ricksha_0	29.6344	0.00393256	0.0347377	0.158122	0.99737	MULE-MuDR
Charlie1b	701.505	-0.00864469	0.0347559	0.334458	0.99737	hAT-Charlie
LTRIS3	248.124	0.00893717	0.0349611	0.30942	0.99737	ERV1
RLTR11B	694.322	-0.0116901	0.0360799	0.197368	0.99737	ERVK
MER72B	8.2648	0.00172316	0.0345198	0.385057	0.99737	ERV1
MLT1E3-int	3.19158	-0.00113373	0.0345158	0.379866	0.99737	ERVL-MaLR
HERVL40-int	94.8001	0.00258912	0.0341292	0.659921	0.99737	ERVL
LTR40a	200.287	-0.00188141	0.0338912	0.780466	0.99737	ERVL
LTR68	18.7916	0.00190718	0.0344764	0.494888	0.99737	ERV1
MER57E2	3.5094	0.000777418	0.0345045	0.524616	0.99737	ERV1
L1MDb	180.369	0.00663061	0.0345211	0.388764	0.99737	L1
MLT2C1	241.819	0.0015647	0.0337758	0.827552	0.99737	ERVL
RLTR44C	98.9016	0.006545	0.0349479	0.247458	0.99737	ERVK
MLT1E1	154.641	0.0114501	0.036377	0.134273	0.99737	ERVL-MaLR
MLTR31D_MM	177.139	-0.00719429	0.0349258	0.284908	0.99737	ERVK
RLTR26C_MM	138.205	0.00607232	0.0345116	0.391859	0.99737	ERVK
BGLII_Mus	149.238	-4.95316e-05	0.0342235	0.934538	0.99737	ERVK
MER58A	2901.17	-0.00391155	0.0319226	0.697447	0.99737	hAT-Charlie
RLTR6_Mm	260.895	-0.00825569	0.0352008	0.2416	0.99737	ERV1
MER135	45.2254	-0.00267321	0.0344142	0.514569	0.99737	DNA
MLT1H	741.628	0.00774219	0.0336736	0.487159	0.99737	ERVL-MaLR
RLTR30C_MM	30.1302	0.00323165	0.034592	0.309531	0.99737	ERV1
RLTR12C	368.921	0.00393753	0.033928	0.609107	0.99737	ERVK
MER94	152.523	0.00499105	0.0341568	0.574817	0.99737	hAT-Blackjack
ERVB3_1-I_MM-int	243.88	0.00353488	0.0342102	0.568895	0.99737	ERVK
MTE2a-int	281.354	-0.00807608	0.034566	0.369098	0.99737	ERVL-MaLR
L1M	168.742	0.00270252	0.0337994	0.719063	0.99737	L1
RLTR13D2	185.498	0.00507973	0.0344413	0.427348	0.99737	ERVK
LTR80A	22.5478	-0.00156246	0.0344315	0.552556	0.99737	ERVL
MADE2	70.6221	-0.00200046	0.0341663	0.70744	0.99737	TcMar-Mariner
BLACKJACK	152.557	0.0046418	0.0343724	0.468575	0.99737	hAT-Blackjack
Arthur1C	32.6681	-0.000130965	0.0343003	0.971156	0.99737	hAT-Tip100
LTR40c	230.533	0.00179038	0.0334289	0.834936	0.99737	ERVL
ZP3AR	1603.17	-0.00972032	0.034149	0.381165	0.99737	Satellite
Charlie8	437.686	0.00707237	0.034251	0.428911	0.99737	hAT-Charlie
RLTR13C3	268.829	-0.0130791	0.0367531	0.157179	0.99737	ERVK
LTRIS_Mm	277.877	-0.00864546	0.0355534	0.16029	0.99737	ERV1
MER112	162.174	0.00838696	0.0351901	0.251025	0.99737	hAT-Charlie
RMER30	2106.26	-0.0287898	0.0464181	0.0758432	0.879263	hAT-Charlie
Charlie29a	130.599	0.000272154	0.0337749	0.969614	0.99737	hAT-Charlie
MER90a	181.444	-0.00309392	0.0338496	0.674835	0.99737	ERV1
L1MCc	223.959	-0.00713728	0.0344687	0.388869	0.99737	L1
MLT1F1	749.861	0.00854036	0.0343793	0.418966	0.99737	ERVL-MaLR
MER67A	41.8573	-0.000992661	0.0342643	0.805155	0.99737	ERV1
LTR85a	28.5747	-0.00189879	0.0344338	0.558166	0.99737	Gypsy?
L1ME4c	314.925	-0.00275008	0.0338646	0.699212	0.99737	L1
LTR31	100.396	0.00694993	0.0349498	0.268546	0.99737	ERV1
LTR103_Mam	5.76249	-0.00067926	0.0344833	0.719773	0.99737	ERV1?
RLTR13D3A1	691.819	-0.0104141	0.0348462	0.325188	0.99737	ERVK
SRV_MM-int	168.728	-0.0035637	0.034306	0.525035	0.99737	ERVK
L1MEh	42.6416	0.000759389	0.0343279	0.839931	0.99737	L1
RLTR44E	133.771	0.00669482	0.0350502	0.211603	0.99737	ERVK
MER92B	82.7493	-0.0139184	0.038241	0.0227645	0.52216	ERV1
Arthur1A	34.1373	-0.00273024	0.0344807	0.448901	0.99737	hAT-Tip100
RLTR13B3	416.491	0.00878904	0.0343076	0.401694	0.99737	ERVK
MLT2B3	387.467	0.0134183	0.0369806	0.146285	0.99737	ERVL
MLT1I	438.606	0.00620099	0.034228	0.434782	0.99737	ERVL-MaLR
Tigger13a	384.824	-0.000416338	0.0334842	0.957805	0.99737	TcMar-Tigger
MamRep1151	63.4415	-0.00368685	0.0343769	0.491413	0.99737	LTR?
Charlie21a	54.1566	-0.00248266	0.0342757	0.631483	0.99737	hAT-Charlie
MLT1H1	263.12	0.0166619	0.0392353	0.0703714	0.873991	ERVL-MaLR
Charlie2a	183.386	-0.00841249	0.0354751	0.167034	0.99737	hAT-Charlie
MLT2B2	294.808	-0.00238364	0.0335664	0.732899	0.99737	ERVL
LTR33A	133.124	0.0140088	0.0380484	0.0527826	0.777469	ERVL
LTR33	356.37	0.00205561	0.0334966	0.807356	0.99737	ERVL
RMER16_Mm	193.704	-0.0108631	0.0360302	0.174262	0.99737	ERVK
LTR48B	88.4346	-0.00314423	0.0342138	0.588766	0.99737	ERV1
MER57E1	76.3063	-0.00669392	0.0350147	0.225328	0.99737	ERV1
MLT1H2	393.195	-0.000824996	0.0332931	0.924625	0.99737	ERVL-MaLR
IAPLTR2a	236.612	0.00301438	0.0336906	0.741832	0.99737	ERVK
MER45R	102.282	-0.000188619	0.0340583	0.975827	0.99737	hAT-Tip100
MER102c	205.535	-0.00146463	0.0336541	0.846841	0.99737	hAT-Charlie
Eulor10	10.246	-0.00276074	0.034613	0.189596	0.99737	DNA?
MLTR31E_MM	51.3127	0.00290459	0.0343879	0.521586	0.99737	ERVK
Charlie10	124.961	0.000239416	0.0339288	0.971175	0.99737	hAT-Charlie
MLT2B5	103.371	0.00134683	0.0340084	0.818425	0.99737	ERVL
RLTR41C	81.7108	-0.0023543	0.0342473	0.653417	0.99737	ERV1
Arthur1B	139.635	-0.00496942	0.0344908	0.410354	0.99737	hAT-Tip100
IAPA_MM-int	30.9296	-0.00138216	0.034335	0.719318	0.99737	ERVK
L1ME3C	119.218	0.00513985	0.0344569	0.412953	0.99737	L1
MLT2E	40.7314	-0.00252928	0.0344732	0.463097	0.99737	ERVL
IAPEY5_LTR	8.88273	0.00190983	0.0345615	0.186578	0.99737	ERVK
IAPEY5_I-int	7.35401	0.00207239	0.0345749	0.141301	0.99737	ERVK
RMER16B2	246.149	-0.0016537	0.0334543	0.843742	0.99737	ERVK
MER20B	388.688	0.00277288	0.033517	0.747722	0.99737	hAT-Charlie
MER103C	376.285	-0.0038279	0.0337616	0.643806	0.99737	hAT-Charlie
LTR67B	208.898	0.00264965	0.0337945	0.726818	0.99737	ERVL
MER87	11.474	0.00148593	0.0345099	0.42708	0.99737	ERV1
Chap1_Mam	58.5422	0.00156934	0.0341945	0.754056	0.99737	hAT-Charlie
MER89-int	9.56943	0.00163765	0.0344995	0.458551	0.99737	ERV1
Charlie24	142.213	-0.00410812	0.034216	0.526036	0.99737	hAT-Charlie
L1ME3F	150.568	-0.00224222	0.0341661	0.680427	0.99737	L1
Charlie17	86.1208	0.00716372	0.0351469	0.198535	0.99737	hAT-Charlie
MER63A	135.282	0.00878193	0.0356108	0.150318	0.99737	hAT-Blackjack
MurERV4_19-int	477.472	-0.000802554	0.0332917	0.933115	0.99737	ERVK
MER70A	81.8209	0.00328389	0.0343776	0.505266	0.99737	ERVL
RLTR31_Mur	183.736	-0.00934337	0.0359049	0.103829	0.99737	ERVK
MamTip2	257.701	-0.00494754	0.0339179	0.550539	0.99737	hAT-Tip100
MER77	400.639	0.00627341	0.0339351	0.498712	0.99737	ERVL
LTR16B	62.7047	0.00584816	0.0349102	0.224717	0.99737	ERVL
RLTR31A_Mm	79.4938	-0.00113232	0.0341653	0.832761	0.99737	ERVK
MER130	32.9243	-0.00895649	0.0360271	0.0266369	0.553344	Unknown
RLTR20A	144.78	-0.00713754	0.0349372	0.277167	0.99737	ERVK
MLT1G1	2021.23	-0.0233328	0.0442959	0.0464945	0.710978	ERVL-MaLR
LTR102_Mam	43.1311	-0.000612466	0.0343316	0.862931	0.99737	ERVL
LTR53B	8.78709	0.000548031	0.0344475	0.806365	0.99737	ERVL
Charlie7a	26.363	-0.00212423	0.0344554	0.51262	0.99737	hAT-Charlie
MER21-int	47.5578	-0.000998612	0.0342661	0.813861	0.99737	ERVL
MER5C1	51.8152	-0.00235269	0.0342767	0.629903	0.99737	hAT-Charlie
MTEb-int	255.133	0.0034357	0.0339947	0.627933	0.99737	ERVL-MaLR
LTRIS6	12.36	0.00381681	0.0347622	0.0769406	0.879263	ERV1
RLTR24	586.245	-0.0120215	0.0362568	0.1849	0.99737	ERV1
LTRIS5	44.461	-0.000779506	0.0343044	0.816796	0.99737	ERV1
MER115	134.026	0.0144805	0.0383366	0.0438262	0.699314	hAT-Tip100
ORSL-2b	46.7549	0.00541481	0.0348667	0.212786	0.99737	hAT-Tip100
MLT1G	286.03	-0.00536309	0.0340251	0.523792	0.99737	ERVL-MaLR
ERVL-int	173.61	0.0043499	0.0341432	0.535783	0.99737	ERVL
LTR86A2	13.4914	-0.00113907	0.034436	0.667289	0.99737	ERVL
MER127	59.4781	0.00329456	0.0344125	0.478716	0.99737	TcMar-Tigger
LTR33A_	181.119	0.00207555	0.0340244	0.738257	0.99737	ERVL
MER94B	16.4995	0.00512603	0.0349635	0.0746279	0.879263	hAT-Blackjack
MER58C	224.799	-0.00679723	0.0345869	0.357809	0.99737	hAT-Charlie
Charlie23a	82.8346	-0.00425012	0.0345227	0.389598	0.99737	hAT-Charlie
MER117	285.715	-0.00566496	0.0341055	0.492757	0.99737	hAT-Charlie
Helitron2Na_Mam	30.8023	0.00117234	0.0343444	0.750899	0.99737	Helitron?
UCON28c	1.78342	-0.00084392	0.0345171	0.332256	0.99737	Unknown
MER45A	180.207	-0.00104513	0.0336857	0.885986	0.99737	hAT-Tip100
RLTR30D_MM	162.848	0.0043468	0.0341707	0.527052	0.99737	ERV1
Charlie15a	76.1109	-0.00373392	0.0343085	0.504432	0.99737	hAT-Charlie
L4_A_Mam	296.282	-0.00377556	0.0338156	0.660102	0.99737	RTE-X
L1PB4	64.8502	-0.00472103	0.0346691	0.312808	0.99737	L1
X6A_LINE	33.6759	0.00179767	0.0343978	0.605281	0.99737	CR1
Charlie18a	134.345	0.00354334	0.0342039	0.566641	0.99737	hAT-Charlie
LTR33B	39.0234	0.00225204	0.0343392	0.606877	0.99737	ERVL
MER81	184.743	0.00739236	0.0349835	0.276599	0.99737	hAT-Blackjack
RLTR44D	26.8839	-0.000670992	0.0344082	0.807242	0.99737	ERVK
LTR81	11.2215	-0.000743399	0.0344418	0.755449	0.99737	Gypsy
HERV16-int	104.409	-0.00117971	0.0340373	0.83948	0.99737	ERVL
X6B_LINE	48.0484	-0.00065586	0.0342761	0.846548	0.99737	CR1
MamRep4096	35.6656	0.000470331	0.0343038	0.892211	0.99737	hAT?
MER70B	82.7441	0.00345972	0.0343681	0.50125	0.99737	ERVL
MER67B	147.123	0.00799222	0.035252	0.214729	0.99737	ERV1
Tigger19a	479.476	-0.0053934	0.0334068	0.569829	0.99737	TcMar-Tigger
ERVB5_2-LTR_MM	134.615	0.000341182	0.0338926	0.953688	0.99737	ERVK
MamRep434	159.303	-0.00306044	0.0339938	0.654386	0.99737	TcMar-Tigger
Charlie16a	109.49	-0.00872121	0.0355625	0.161332	0.99737	hAT-Charlie
LTR41	257.686	0.007007	0.0344424	0.401946	0.99737	ERVL
RLTR20A1	44.1276	0.00207112	0.0343636	0.610221	0.99737	ERVK
MLT1D-int	86.5019	-0.00423787	0.0344267	0.462202	0.99737	ERVL-MaLR
MER113	308.713	-0.00443835	0.0336027	0.61969	0.99737	hAT-Charlie
LTR53	132.122	0.67498	0.181895	7.88568e-06	0.000964682	ERVL
ERVB4_3-I_MM-int	57.0375	-3.72911e-05	0.0342637	0.993747	0.99737	ERVK
HAL1b	238.849	-0.0136721	0.0375806	0.0856874	0.934078	L1
L1ME5	31.587	0.00282202	0.0344945	0.433109	0.99737	L1
CR1_Mam	159.845	0.0016066	0.0340344	0.787984	0.99737	CR1
MER102b	430.441	0.0171236	0.0384374	0.135556	0.99737	hAT-Charlie
Tigger15a	469.014	0.00749859	0.0339511	0.465741	0.99737	TcMar-Tigger
Charlie14a	21.5564	-0.000599134	0.0343638	0.851079	0.99737	hAT-Charlie
L1MEa	96.3792	0.00486318	0.0343471	0.463801	0.99737	L1
LTR83	39.8655	0.000527346	0.0343804	0.921881	0.99737	ERVL
FAM	70.7046	-0.000291828	0.0340435	0.954078	0.99737	Alu
LTR88a	7.26355	0.00191113	0.0345392	0.322253	0.99737	Gypsy?
MMERVK10D3_LTR	27.1163	0.0015665	0.0343773	0.660454	0.99737	ERVK
LTR16A2	71.2236	0.00197395	0.0342521	0.675518	0.99737	ERVL
MamGypLTR3a	36.7887	-0.00170259	0.0344011	0.618597	0.99737	Gypsy
LTR16B1	59.3478	0.000479948	0.0343147	0.899346	0.99737	ERVL
RLTR13D3A	164.719	-0.00376988	0.0338182	0.596281	0.99737	ERVK
FordPrefect	134197	0.00350445	0.0346445	0.250521	0.99737	hAT-Tip100
MER99	48.1833	0.00534825	0.034892	0.186494	0.99737	hAT?
RLTR13D1	107.796	0.00407629	0.0342754	0.514922	0.99737	ERVK
LTR16A1	81.0513	0.00665143	0.0351889	0.128405	0.99737	ERVL
LTR78	109.791	0.00542087	0.0346069	0.358344	0.99737	ERV1
MamRep1879	53.523	0.00216762	0.0342472	0.66295	0.99737	hAT-Tip100?
MLT1J-int	118.894	-0.00191257	0.034002	0.758387	0.99737	ERVL-MaLR
MER104	183.84	-0.00539666	0.0341726	0.48996	0.99737	TcMar-Tc2
RMER16B	52.6708	0.00058697	0.0342119	0.900601	0.99737	ERVK
LTR28B	28.6083	-0.00154468	0.0343935	0.64809	0.99737	ERV1
RLTR48B	60.4757	0.00137323	0.0341346	0.793438	0.99737	ERV1
MER67C	96.9653	-0.00630695	0.0347703	0.311582	0.99737	ERV1
ERVB4_1-I_MM-int	302.982	-0.00812217	0.0348228	0.31262	0.99737	ERVK
RLTR20C	119.616	-0.00532974	0.0346836	0.324403	0.99737	ERVK
L1M3e	394.581	0.0130238	0.0366444	0.171106	0.99737	L1
RLTR22_Mus	406.832	-0.00837776	0.0345064	0.377232	0.99737	ERVK
Eulor6B	24.7218	-0.0019744	0.034461	0.515235	0.99737	DNA?
RLTR12G	180.814	-1.83777e-05	0.0335885	0.996533	0.998347	ERVK
RLTR30D_RN	200.131	0.00324859	0.0343179	0.514885	0.99737	ERV1
LTR33C	80.6027	7.52881e-05	0.0340323	0.993449	0.99737	ERVL
Charlie15b	166.648	0.00390053	0.0340846	0.578338	0.99737	hAT-Charlie
MER126	70.4246	0.00242468	0.0342043	0.663564	0.99737	DNA
LTR84a	71.0545	-0.00591812	0.0348294	0.275357	0.99737	ERVL
Zaphod3	97.5744	0.00186174	0.033953	0.770851	0.99737	hAT-Tip100
X1_LINE	5.42785	-0.00103287	0.0344909	0.556254	0.99737	CR1
LTR16E2	69.9401	-0.00166509	0.0342117	0.732661	0.99737	ERVL
MER105	213.929	0.00510878	0.0339996	0.520356	0.99737	DNA
MLT1N2	170.734	0.00433142	0.0341944	0.521816	0.99737	ERVL-MaLR
UCON5	4.66297	6.8104e-05	0.0344807	0.964704	0.99737	Unknown
Eulor11	6.47409	-0.00182624	0.034539	0.298754	0.99737	DNA
ORSL-2a	21.4022	-0.00388468	0.0346784	0.240222	0.99737	hAT-Tip100
Eulor1	7.78429	-0.00373645	0.0347622	0.0536672	0.777469	DNA
IAPEY_LTR	230.09	-9.80358e-05	0.0341	0.983604	0.99737	ERVK
UCON29	48.416	0.0027729	0.0343994	0.530809	0.99737	PiggyBac?
MER124	48.9366	0.00774855	0.0355459	0.0706496	0.873991	DNA?
MER76	70.8274	0.0020785	0.0343216	0.635006	0.99737	ERVL
RLTR35B_MM	131.22	-0.00539472	0.034699	0.318841	0.99737	ERVL
MT-int	339.281	0.00337571	0.0337306	0.675359	0.99737	ERVL-MaLR
RLTR8	229.531	0.00526809	0.0343827	0.442976	0.99737	ERVK
hAT-N1_Mam	122.997	-0.0161574	0.0397063	0.0151197	0.487254	hAT?
MamRep488	5.11807	-0.00217563	0.0345899	0.103464	0.99737	hAT-Tip100
X8_LINE	48.7481	-0.000464732	0.034327	0.880009	0.99737	CR1
MER63B	174.148	0.00153059	0.0338062	0.809725	0.99737	hAT-Blackjack
Charlie17a	36.5586	0.00578904	0.0349715	0.171666	0.99737	hAT-Charlie
LTR88b	13.8807	-0.0038128	0.0347478	0.118897	0.99737	Gypsy?
RLTR48C	73.2886	-0.00124982	0.0340428	0.827478	0.99737	ERV1
MLT1I-int	4.32654	-3.33257e-05	0.0344843	0.981126	0.99737	ERVL-MaLR
L5	19.6688	-0.00288291	0.0345593	0.3398	0.99737	RTE-X
Tigger17	221.638	0.00498493	0.0338133	0.566895	0.99737	TcMar-Tigger
MER65-int	17.5723	-0.000967643	0.0344386	0.702344	0.99737	ERV1
RLTR49	651.445	-0.0014297	0.0333645	0.860195	0.99737	ERVK
L1M2a	63.7765	0.00640798	0.0349718	0.229188	0.99737	L1
RLTR50A	5.08228	-0.000664475	0.0344809	0.71197	0.99737	ERVK
MamGypLTR1d	10.7556	0.00522446	0.0350565	0.00656261	0.335385	Gypsy
MER67D	28.9117	0.00181925	0.0343762	0.628469	0.99737	ERV1
MER96	24.4667	-0.000117691	0.0343686	0.973955	0.99737	hAT-Tip100
ORSL	43.1615	-0.00122132	0.0342457	0.791186	0.99737	hAT-Tip100
Charlie10b	22.3121	0.000532163	0.034356	0.893537	0.99737	hAT-Charlie
ERVB3_1-LTR_MM	75.7437	0.00792205	0.0353552	0.171661	0.99737	ERVK
LTR101_Mam	24.6198	0.0036281	0.0346452	0.26086	0.99737	ERVL
MER97c	10.6624	0.000677899	0.0344532	0.757053	0.99737	hAT-Tip100
MER63C	139.074	0.00377806	0.0342326	0.571401	0.99737	hAT-Blackjack
UCON27	2.6421	0.000599102	0.0345064	0.541853	0.99737	Unknown
RLTR41B	37.6372	0.00515818	0.0348396	0.211231	0.99737	ERV1
LTR40A1	37.8841	-0.00250083	0.0344167	0.525344	0.99737	ERVL
Eulor9C	65.8548	0.00117674	0.034261	0.783398	0.99737	DNA
MLT1B-int	78.614	-0.00336366	0.034351	0.514279	0.99737	ERVL-MaLR
UCON25	2.3479	-5.50436e-05	0.0344975	0.955483	0.99737	Unknown
RMER16A2	155.08	-0.0114414	0.0364192	0.134191	0.99737	ERVK
RLTR10E	102.25	0.00199073	0.0342217	0.693369	0.99737	ERVK
MER5C	97.4103	-0.0029058	0.0342628	0.586865	0.99737	hAT-Charlie
ERVB5_1-I_MM-int	36.0873	0.00477242	0.0348255	0.173148	0.99737	ERVK
L1M8	111.852	-0.00127721	0.033886	0.845748	0.99737	L1
L1M7	119.253	-0.00499368	0.0344144	0.44666	0.99737	L1
RMER16C	69.085	-0.00425569	0.0344611	0.429932	0.99737	ERVK
Charlie4z	392.788	-0.00718443	0.0338225	0.482545	0.99737	hAT-Charlie
LTR86A1	50.9872	-0.000663889	0.0343239	0.855671	0.99737	ERVL
RMER6-int	225.525	-0.00101668	0.0333856	0.904296	0.99737	ERVK
Charlie26a	43.8388	-0.000368658	0.0342806	0.921747	0.99737	hAT-Charlie
LTR73	63.0807	0.00282988	0.0343177	0.59095	0.99737	ERV1
RLTR30B_MM	141.684	0.000827828	0.0338573	0.899774	0.99737	ERV1
Tigger16b	134.305	0.000158921	0.0339252	0.978679	0.99737	TcMar-Tigger
LTR82A	170.689	-0.00646741	0.0345263	0.387271	0.99737	ERVL
L1M6	47.5785	-0.00308606	0.0344757	0.448098	0.99737	L1
Tigger11a	44.768	-0.0039969	0.0345947	0.340593	0.99737	TcMar-Tigger
RLTR53_Mm	252.503	-0.00305938	0.0339211	0.667833	0.99737	ERVK
MER96B	130.321	-0.00488952	0.034246	0.488916	0.99737	hAT-Tip100
LTR16E1	84.5023	0.00320179	0.0343702	0.51812	0.99737	ERVL
Eulor6C	3.44723	-0.000154807	0.0344918	0.937185	0.99737	DNA?
RLTR19D	12.507	0.00544133	0.0350808	0.0181702	0.487254	ERVK
Tigger9a	171.077	-0.0175922	0.0402104	0.0416159	0.673811	TcMar-Tigger
LTR106_Mam	33.741	0.000333236	0.0342888	0.933174	0.99737	LTR
RLTR19A2	25.0543	0.00256127	0.0344885	0.447005	0.99737	ERVK
L1MEg2	46.2911	0.00489168	0.0346893	0.304505	0.99737	L1
MLT2F	153.818	0.0040493	0.0344495	0.444468	0.99737	ERVL
LTR79	101.552	0.000382405	0.0338854	0.954746	0.99737	ERVL
LTR52	24.9682	0.00157384	0.0343867	0.653442	0.99737	ERVL
Charlie11	24.3011	0.00337862	0.0345938	0.313874	0.99737	hAT-Charlie
LTRIS4B	20.0176	-0.00140496	0.0344456	0.604287	0.99737	ERV1
MER54B	53.9059	0.000590504	0.0342979	0.881486	0.99737	ERVL
Charlie25	80.0705	0.00285454	0.0342693	0.64349	0.99737	hAT-Charlie
RLTR19C	220.49	-0.00985525	0.0358023	0.184928	0.99737	ERVK
MLT1C-int	53.0235	-0.00391462	0.0345169	0.396112	0.99737	ERVL-MaLR
UCON31	26.2511	-0.00844641	0.0358879	0.0174789	0.487254	Unknown
UCON10	15.2172	-0.00260744	0.0345764	0.275413	0.99737	Unknown
RLTR31B_Mm	133.516	0.000675511	0.0338137	0.93321	0.99737	ERVK
UCON7	11.1696	0.00134657	0.0344846	0.531021	0.99737	DNA?
MLTR13	131.32	0.00537534	0.0343096	0.461689	0.99737	ERVK
MURVY-LTR	1004.52	-0.185563	0.176544	0.0052512	0.289078	ERV1
LTR37B	87.2643	0.000979134	0.03405	0.843501	0.99737	ERV1
Tigger17b	54.6147	-0.000233159	0.0342355	0.95779	0.99737	TcMar-Tigger
MER74C	10.6833	0.00131876	0.0344801	0.549956	0.99737	ERVL
UCON8	28.6854	0.00100915	0.0343153	0.775714	0.99737	Unknown
LTR75B	27.3537	-0.00137821	0.0343578	0.681109	0.99737	ERVL
LTR88c	359.27	-0.0116234	0.0360687	0.197392	0.99737	Gypsy?
MER57D	91.082	-0.00479791	0.0344712	0.411188	0.99737	ERV1
X9_LINE	12.3183	0.0015966	0.0344754	0.525593	0.99737	L1?
MER66-int	9.93446	0.000117886	0.0344458	0.984525	0.99737	ERV1
Kanga1	121.108	-0.00856203	0.0355419	0.155875	0.99737	TcMar-Tc2
MER91B	89.4084	-0.00847533	0.035536	0.147754	0.99737	hAT-Tip100
LTR107_Mam	194.838	0.000175569	0.0341465	0.974958	0.99737	LTR
Tigger2b	182.359	0.00475603	0.0339762	0.582463	0.99737	TcMar-Tigger
Tigger10	270.085	-0.00336637	0.0339514	0.744409	0.99737	TcMar-Tigger
MLT1H1-int	17.4444	0.000228197	0.0344176	0.928947	0.99737	ERVL-MaLR
Charlie13b	78.5997	-0.0083374	0.0355404	0.136336	0.99737	hAT-Charlie
Tigger14a	97.4823	0.00152902	0.0341588	0.769824	0.99737	TcMar-Tigger
Helitron3Na_Mam	127.36	-0.00275395	0.0341027	0.656925	0.99737	Helitron
MER92C	5.2199	-0.00251586	0.0346096	0.131845	0.99737	ERV1
MLT1F-int	156.943	0.00141702	0.0338123	0.841667	0.99737	ERVL-MaLR
HAL1_SS	20.6606	-0.00862355	0.0359873	0.0085707	0.359679	L1
MER134	10.871	-0.00102253	0.0344824	0.591496	0.99737	DNA?
L1M3c	28.8627	0.00220159	0.0344558	0.507051	0.99737	L1
MamTip3	49.1183	0.00394302	0.034539	0.390195	0.99737	hAT-Tip100
X7A_LINE	63.2837	0.00319901	0.0343985	0.501589	0.99737	CR1
Kanga2_a	174.842	0.00226429	0.0337589	0.766732	0.99737	TcMar-Tc2
MamRep38	53.6926	-0.000638772	0.0343215	0.860468	0.99737	hAT
MER97b	8.45051	0.00198791	0.0345448	0.30235	0.99737	hAT-Tip100
Kanga11a	80.4032	-0.000803044	0.0341053	0.880088	0.99737	TcMar-Tc2
LTR82B	50.4463	0.00504162	0.0347913	0.235027	0.99737	ERVL
Charlie22a	75.1102	0.006352	0.0350033	0.213396	0.99737	hAT-Charlie
LTR41B	107.172	-0.000695599	0.0340046	0.903865	0.99737	ERVL
MLT1M	100.79	0.000226897	0.0341098	0.991825	0.99737	ERVL-MaLR
Zaphod2	14.7625	0.00168777	0.0344708	0.525677	0.99737	hAT-Tip100
LTR84b	72.2177	-0.00725603	0.0352695	0.149906	0.99737	ERVL
RLTR1F_Mm	21.4145	0.0045833	0.0348334	0.13118	0.99737	ERVK
LTR52-int	4.40809	0.000606161	0.034486	0.690308	0.99737	ERVL
MER110-int	9.97569	0.00259006	0.0345896	0.232892	0.99737	ERV1
RMER16B3	26.5616	0.000154865	0.0343829	0.959737	0.99737	ERVK
UCON19	1.22001	-0.00043063	0.0345092	0.549705	0.99737	Unknown
LTR86C	14.4815	-0.0028474	0.0346003	0.245237	0.99737	ERVL
LTR65	134.44	-0.000403403	0.0338217	0.95144	0.99737	ERV1
RLTR20A2	157.295	0.000172248	0.0336828	0.993197	0.99737	ERVK
RLTR19A	115.009	0.00427362	0.0342083	0.520752	0.99737	ERVK
MLT1F2-int	107.518	0.00492545	0.0344427	0.429042	0.99737	ERVL-MaLR
Eulor5A	33.5761	0.00516098	0.0349003	0.151607	0.99737	DNA?
LTR85b	11.09	-0.00367429	0.034715	0.142	0.99737	Gypsy?
LTR86B2	19.2439	-0.00337206	0.0346216	0.267821	0.99737	ERVL
MER106A	280.704	0.0123771	0.0367213	0.134694	0.99737	hAT-Charlie
MLT1F1-int	17.1472	0.000516665	0.0344245	0.840027	0.99737	ERVL-MaLR
UCON13	4.82016	-0.00127754	0.0345211	0.351608	0.99737	Penelope?
UCON20	5.3492	0.000999562	0.0344991	0.520261	0.99737	Unknown
Mam_R4	14.3504	0.0038346	0.0347292	0.147208	0.99737	Dong-R4
MER58D	207.205	-0.0053306	0.0341897	0.483107	0.99737	hAT-Charlie
X7C_LINE	82.5813	-0.00648284	0.0349764	0.230864	0.99737	CR1
MMTV-int	114.866	7.93432e-05	0.0339929	0.990399	0.99737	ERVK
RLTR46A	7.56756	0.00192725	0.0345371	0.324911	0.99737	ERVK
LTR108d_Mam	6.50483	0.00151519	0.034512	0.413533	0.99737	ERVL
ERV3-16A3_LTR	61.2739	-0.00141196	0.0342597	0.733298	0.99737	ERVL
MER73	7.10767	-0.0026865	0.0346277	0.113174	0.99737	ERVL
LTR87	165.867	0.00681526	0.0346356	0.357901	0.99737	ERVL?
Kanga1d	50.2468	-0.00647886	0.0350929	0.166249	0.99737	TcMar-Tc2
Eulor2A	11.2255	-0.00128357	0.0344902	0.517997	0.99737	DNA?
MER68C	24.98	-0.00739633	0.0355243	0.0350575	0.612672	ERVL
MamGypLTR1a	19.2525	0.000992521	0.0344092	0.736017	0.99737	Gypsy
LTR108a_Mam	32.2138	0.00690967	0.0352927	0.0907464	0.951541	ERVL
ERVB4_3-LTR_MM	18.29	0.0019073	0.034462	0.527685	0.99737	ERVK
MMSAT4	22181.1	-0.00093838	0.0343063	0.806595	0.99737	Satellite
Eulor8	3.75293	-9.95616e-05	0.0344994	0.875735	0.99737	TcMar?
MLT1E2-int	12.4916	-0.00229093	0.0345448	0.332285	0.99737	ERVL-MaLR
MER95	4.3019	0.00110625	0.0345166	0.383751	0.99737	ERV1
Charlie10a	44.2401	0.000545107	0.0342201	0.903557	0.99737	hAT-Charlie
LTR90B	29.7643	0.00037197	0.0343126	0.923271	0.99737	LTR
UCON14	8.32525	0.00220817	0.0345631	0.260012	0.99737	DNA?
Tigger12c	61.7169	0.00148997	0.0341696	0.766376	0.99737	TcMar-Tigger
Tigger12A	35.6755	0.000657328	0.0342934	0.866612	0.99737	TcMar-Tigger
LTR16D	60.9471	0.00994827	0.0362475	0.0622517	0.829024	ERVL
SUBTEL_sa	4.772	-0.00121227	0.034517	0.375091	0.99737	Satellite
MER102a	197.354	0.00703289	0.0344145	0.406681	0.99737	hAT-Charlie
MER68-int	76.5044	-0.00128896	0.0341406	0.806338	0.99737	ERVL
LTR81A	33.4788	-0.00325793	0.0345587	0.355894	0.99737	Gypsy
RLTR13D	28.5212	0.00328852	0.0345516	0.37856	0.99737	ERVK
MER91A	154.169	0.00629998	0.0345416	0.386604	0.99737	hAT-Tip100
MamRep1527	62.9256	0.00068003	0.0341096	0.895462	0.99737	LTR
Eulor12	11.2006	0.00248727	0.034569	0.28001	0.99737	DNA?
L1M6B	6.30392	9.92688e-06	0.0344843	0.988121	0.99737	L1
L1MEj	106.819	-0.0169746	0.0403983	0.00882046	0.359679	L1
FordPrefect_a	5.71171	-0.000220081	0.0344828	0.891879	0.99737	hAT-Tip100
LTR105_Mam	54.124	-0.000431793	0.0341456	0.929934	0.99737	ERVL
RLTR5_Mm	63.393	0.00471202	0.0346634	0.311709	0.99737	ERV1
X5A_LINE	25.4956	-0.00145968	0.0344121	0.641552	0.99737	CR1
MLT1H2-int	6.10793	-0.000116252	0.0344656	0.946026	0.99737	ERVL-MaLR
L1M3d	28.9715	0.00450102	0.0347685	0.203111	0.99737	L1
RNERVK23-int	116.75	-0.00450951	0.0346908	0.276481	0.99737	ERVK
LTR75	33.9185	0.000111151	0.0343174	0.97713	0.99737	ERVL
MamGypLTR2b	18.6494	-0.00436392	0.0348326	0.0842279	0.927349	Gypsy
MamGypLTR1b	31.7331	-0.000394286	0.0342915	0.918679	0.99737	Gypsy
MLT1J2-int	2.8558	0.000173732	0.0344947	0.877463	0.99737	ERVL-MaLR
MER133A	5.06965	-0.00108502	0.0344958	0.520556	0.99737	DNA?
MER123	16.087	0.00135913	0.0344547	0.599985	0.99737	DNA
MLT1J1-int	26.2515	-0.00159373	0.0344137	0.628663	0.99737	ERVL-MaLR
MER66B	7.25957	0.00181412	0.0345312	0.338266	0.99737	ERV1
MamTip1	23.5875	0.000351475	0.0343453	0.91442	0.99737	hAT-Tip100
MLTR31C_MM	161.25	0.00299333	0.0341585	0.606701	0.99737	ERVK
Charlie17b	73.8629	0.00645039	0.0349471	0.254619	0.99737	hAT-Charlie
MER110	25.3984	-0.00244703	0.0344509	0.494838	0.99737	ERV1
Tigger20a	96.0162	0.0018742	0.0339683	0.767679	0.99737	TcMar-Tigger
MLT1G1-int	6.42435	0.000592229	0.0344856	0.703516	0.99737	ERVL-MaLR
RLTR9A4	1.50802	-0.000474294	0.0345092	0.522249	0.99737	ERVK
UCON21	9.10963	-0.000789025	0.0344587	0.712459	0.99737	DNA?
MER125	9.19658	-0.000668268	0.0344555	0.753657	0.99737	DNA
DNA1_Mam	15.9518	-0.0051812	0.0349992	0.0459158	0.710978	TcMar
Ricksha	130.665	0.00330478	0.0342457	0.567114	0.99737	MULE-MuDR
RLTR46B	12.939	-0.000473776	0.0344543	0.816539	0.99737	ERVK
LTR86B1	15.999	0.00070692	0.0344054	0.804671	0.99737	ERVL
ERVB5_1-LTR_MM	56.0724	0.000580588	0.0342343	0.893592	0.99737	ERVK
MER31-int	72.4232	-0.00431901	0.0344593	0.42018	0.99737	ERV1
LTR9A1	7.09915	0.000273861	0.0344677	0.879738	0.99737	ERV1
SYNREP_MM	38.5608	-0.00421931	0.0347761	0.144195	0.99737	Satellite
MLT1A0-int	87.5096	0.00505467	0.0345714	0.381265	0.99737	ERVL-MaLR
MER66C	1.92591	-0.00112429	0.0345243	0.282005	0.99737	ERV1
MER113A	46.7844	0.000487399	0.0342944	0.902503	0.99737	hAT-Charlie
Tigger12	71.1831	-0.00332041	0.0343602	0.513531	0.99737	TcMar-Tigger
MamGypLTR3	13.8974	3.45182e-05	0.034421	0.999294	0.999294	Gypsy
Eulor6A	3.33617	0.000814931	0.0345081	0.472935	0.99737	DNA?
Eulor9A	49.9926	0.00560219	0.0349094	0.198025	0.99737	DNA
LTR9	1.35052	-0.00105667	0.0345275	0.198068	0.99737	ERV1
MamRep564	15.9493	-0.00316585	0.0346415	0.197515	0.99737	Unknown
X5B_LINE	36.0029	-0.00265742	0.0344883	0.441287	0.99737	CR1
LTR81C	18.4308	-0.000249011	0.0344118	0.915707	0.99737	Gypsy
Tigger8	77.1326	-0.00136788	0.0341155	0.798389	0.99737	TcMar-Tigger
MER113B	31.6071	-0.00190572	0.0343795	0.612708	0.99737	hAT-Charlie
Charlie20a	54.7621	0.00368789	0.0344971	0.436862	0.99737	hAT-Charlie
Tigger6b	106.447	-0.0055538	0.0346522	0.343754	0.99737	TcMar-Tigger
MER92A	9.28937	0.0011075	0.0344885	0.55523	0.99737	ERV1
LTR103b_Mam	7.77528	-7.5702e-05	0.0344566	0.967984	0.99737	ERV1?
UCON12A	3.96129	0.00035193	0.0344797	0.826154	0.99737	Unknown
MLT1A-int	9.66801	0.00285798	0.034607	0.230297	0.99737	ERVL-MaLR
LTR109A2	6.26811	-0.0026058	0.0346244	0.0970292	0.989159	ERV1
UCON28b	6.97626	-0.000156838	0.0344601	0.9321	0.99737	Unknown
MER97a	3.34874	-0.000689857	0.0345025	0.555594	0.99737	hAT-Tip100
IAPEY4_LTR	91.1753	0.0134827	0.0380696	0.0168559	0.487254	ERVK
Charlie1b_Mars	1.13272	-0.000915822	0.0345279	0.066479	0.851086	hAT-Charlie
MER34B-int	1029.37	-0.00103152	0.0339519	0.866374	0.99737	ERV1
MER50-int	4.94485	-0.00218066	0.0345791	0.125146	0.99737	ERV1
LTR77	3.84273	-0.00145106	0.0345378	0.225377	0.99737	ERV1
LTR37-int	66.5415	-0.00189609	0.034251	0.702387	0.99737	ERV1
ERVB2_1-I_MM-int	16.8864	2.68623	0.533993	3.66441e-08	5.7636e-06	ERVK
MER50B	5.95688	-0.00286941	0.0346504	0.0881545	0.951541	ERV1
LTR69	37.1324	-0.00190637	0.0343437	0.788229	0.99737	ERVL
LTR28	1.23215	0.000633532	0.0345129	0.401461	0.99737	ERV1
L1MEg1	26.5662	0.00243418	0.0345112	0.414085	0.99737	L1
RLTR12F	4.59765	0.000813625	0.0344993	0.558696	0.99737	ERVK
Charlie6	47.9262	-0.00437091	0.0345806	0.362243	0.99737	hAT-Charlie
RLTR12B2	61.2799	-0.000929019	0.0342054	0.842381	0.99737	ERVK
IAPLTR4_I	57.0256	0.00301026	0.0344387	0.481779	0.99737	ERVK
MamRep1894	8.05609	-0.00339731	0.0347165	0.0581736	0.810749	hAT
LTR108b_Mam	3.31611	0.000692074	0.0345036	0.549116	0.99737	ERVL
Eulor5B	4.66465	-0.00165768	0.0345429	0.24291	0.99737	DNA?
MERX	32.9703	-0.00207097	0.0343748	0.598535	0.99737	TcMar-Tigger
LTR108e_Mam	4.45278	0.000810937	0.0344982	0.564576	0.99737	ERVL
LTR45	3.64372	0.000235205	0.0344844	0.870857	0.99737	ERV1
MER97d	14.5031	0.00610452	0.0352252	0.0203213	0.520319	hAT-Tip100
Eulor6E	8.84161	-0.000327196	0.0344833	0.814542	0.99737	DNA?
MLT1A1-int	18.8745	-0.00321319	0.0346309	0.232142	0.99737	ERVL-MaLR
RLTR4_Mm	285.973	-0.00239447	0.0335981	0.77367	0.99737	ERV1
UCON22	4.74827	0.00117757	0.0345131	0.409895	0.99737	Unknown
LTR32	1.3754	0.000562826	0.0345117	0.437841	0.99737	ERVL
L1M3f	34.9411	0.000840164	0.0343536	0.809172	0.99737	L1
MER70-int	50.0295	0.00175219	0.0342771	0.700873	0.99737	ERVL
HERVL74-int	100.218	0.0180853	0.041305	0.00670161	0.335385	ERVL
MamGyp-int	1.4173	0.000206459	0.0345006	0.824739	0.99737	Gypsy
Tigger1a_Art	40.2925	-0.00147558	0.0343184	0.711724	0.99737	TcMar-Tigger
MER4B-int	17.3456	-0.00188084	0.0345176	0.394864	0.99737	ERV1
X2_LINE	10.4218	0.000322393	0.034438	0.890549	0.99737	CR1
UCON2	151.883	-0.000710382	0.034036	0.898216	0.99737	Unknown
MER91C	15.6603	0.00634947	0.0352618	0.0336325	0.597248	hAT-Tip100
L1M3a	4.41646	-0.000255621	0.034488	0.847152	0.99737	L1
LTR16D1	16.2582	0.00366125	0.034681	0.207396	0.99737	ERVL
UCON18	2.67017	-9.39002e-05	0.0344922	0.934214	0.99737	Unknown
MER129	18.3618	-0.00545835	0.0350256	0.0718688	0.879194	LTR?
LTR16D2	6.41713	0.00266453	0.0346236	0.123411	0.99737	ERVL
MLT1E1A-int	1.33122	0.00103758	0.0345282	0.152748	0.99737	ERVL-MaLR
LTR45C	9.7399	0.0051277	0.0350171	0.0181953	0.487254	ERV1
MER101B	1.80405	0.000734609	0.0345138	0.390966	0.99737	ERV1
Ricksha_a	6.54712	0.000882786	0.0344815	0.624472	0.99737	MuDR
LTR59	2.28371	-0.000420539	0.0345011	0.677358	0.99737	ERV1
MLT1G3-int	22.9908	0.0015473	0.0344559	0.573743	0.99737	ERVL-MaLR
UCON17	1.46379	9.68075e-05	0.0345004	0.919955	0.99737	Unknown
UCON16	2.56137	0.000264603	0.0344977	0.812913	0.99737	Unknown
MLT1G-int	7.98982	0.000130383	0.0344613	0.946364	0.99737	ERVL-MaLR
RMER3D4	3.36454	-0.00038304	0.0344947	0.784934	0.99737	ERVK
Eulor2C	2.38143	-0.00126329	0.0345287	0.260008	0.99737	DNA?
Helitron1Na_Mam	9.4848	0.000915966	0.0344686	0.656996	0.99737	Helitron
UCON9	6.85128	0.000426726	0.0344768	0.79637	0.99737	Unknown
Eulor6D	8.53239	-0.0011862	0.0344966	0.506164	0.99737	DNA?
LTR34	4.39886	0.000755935	0.0344931	0.606843	0.99737	ERV1
LTR9D	3.64294	0.000196958	0.0344867	0.887737	0.99737	ERV1
RLTR3_Mm	3.45897	0.000351164	0.0344926	0.778556	0.99737	ERVK
RLTR46A2	24.9138	0.00494212	0.0349253	0.083492	0.927349	ERVK
X7D_LINE	5.17544	-0.00137909	0.0345256	0.318577	0.99737	CR1
MLT1E-int	3.39656	-0.00158956	0.034548	0.166382	0.99737	ERVL-MaLR
RMER3D3	10.2576	-0.000963292	0.034477	0.624484	0.99737	ERVK
C573_MM	1.53784	-0.000100921	0.0344998	0.915359	0.99737	Other
GSAT_MM	193.261	-0.00407409	0.0347725	0.116972	0.99737	Satellite
Cheshire_Mars_	2.55814	0.000870459	0.0345161	0.348553	0.99737	hAT-Charlie
Eulor9B	3.91843	-0.000684621	0.0344919	0.636025	0.99737	DNA
LTR39	4.09451	-0.0013032	0.0345294	0.271257	0.99737	ERV1
Eulor2B	7.38595	0.000409463	0.0344579	0.838532	0.99737	DNA?
RLTR47_MM	8.7907	0.00119446	0.0344965	0.507709	0.99737	ERV1
UCON23	13.7239	-0.00187126	0.0344832	0.4845	0.99737	hAT?
RNLTR23	1.52266	-0.000645599	0.0345115	0.429642	0.99737	ERVK
UCON1	2.18234	-0.000654382	0.0345079	0.501303	0.99737	Unknown
MER34-int	78.313	0.00334614	0.0343557	0.517206	0.99737	ERV1
L1M2b	9.60707	-0.000669948	0.0344594	0.744174	0.99737	L1
Cheshire_Mars	3.57578	0.000238373	0.0344916	0.85731	0.99737	hAT-Charlie
MER51-int	25.5377	0.000579264	0.0343432	0.867243	0.99737	ERV1
MurSAT1	1.16914	0.000452899	0.0345077	0.570911	0.99737	Satellite

## Sheet: DE gene Obox4 induced
# Supplementary Table 2
# Gene expression in mESCs Obox4 induced versus non induced
ENSEMBL id	baseMean	log2FoldChange	lfcSE	pvalue	padj	symbol
ENSMUSG00000051951.5	3.26	0.101179	0.371888	0.324212	0.702395	Xkr4
ENSMUSG00000025902.13	26.9929	1.19166	0.452032	0.00014875	0.00280905	Sox17
ENSMUSG00000098104.1	2.3813	-0.143196	0.42429	0.202245	0.570739	Gm6085
ENSMUSG00000102175.1	2.18051	-0.103223	0.436049	0.279833	0.660188	RP23-34E15.2
ENSMUSG00000103922.1	169.896	-0.139437	0.151749	0.107085	0.401454	RP23-34E15.4
ENSMUSG00000033845.13	2702.43	-0.0095502	0.100982	0.880551	0.972883	Mrpl15
ENSMUSG00000102275.1	33.6853	-0.0661953	0.191951	0.433857	0.793622	RP23-34E15.5
ENSMUSG00000025903.14	1402.75	0.0737907	0.121678	0.30996	0.691103	Lypla1
ENSMUSG00000033813.15	3914.35	-0.0251616	0.102617	0.695379	0.9193	Tcea1
ENSMUSG00000062588.4	3.43774	-0.0599045	0.338612	0.526225	0.848955	Gm6104
ENSMUSG00000103280.1	5.71447	0.590508	0.781107	0.0119876	0.0936932	RP24-426M1.4
ENSMUSG00000002459.17	3.05894	-0.0747245	0.353081	0.44102	0.798319	Rgs20
ENSMUSG00000033793.12	2337.16	0.0794722	0.126427	0.286232	0.666861	Atp6v1h
ENSMUSG00000025905.14	11.528	1.41121	0.779199	0.000525574	0.00811653	Oprk1
ENSMUSG00000025907.14	1853.08	-0.0489526	0.0903545	0.399585	0.765699	Rb1cc1
ENSMUSG00000090031.2	74.8569	-0.00587913	0.131755	0.935641	0.986104	4732440D04Rik
ENSMUSG00000087247.3	1.33634	0.235326	0.624875	0.0384337	NA	Fam150a
ENSMUSG00000102135.1	4.75408	0.0107629	0.280315	0.903785	0.978574	RP23-5K7.4
ENSMUSG00000051285.17	4225.27	-0.0601427	0.106708	0.365043	0.738985	Pcmtd1
ENSMUSG00000098201.1	11.6467	0.0320298	0.261897	0.718675	0.928127	Gm26983
ENSMUSG00000103509.1	458.959	-0.223472	0.14186	0.0166319	0.119721	WI1-817D1.2
ENSMUSG00000048538.7	2.24203	0.0297189	0.34793	0.739164	0.934476	Gm9826
ENSMUSG00000097797.6	32.0447	0.0743251	0.209984	0.39636	0.763053	Gm26901
ENSMUSG00000103067.1	21.141	0.285593	0.374305	0.0468469	0.240646	RP24-181G14.2
ENSMUSG00000104226.1	2.16379	-0.0212368	0.332576	0.812565	0.953358	RP23-404K2.2
ENSMUSG00000103903.1	1.37326	-0.0379525	0.371292	0.66465	NA	RP23-404K2.1
ENSMUSG00000025909.16	42.0632	-0.330424	0.303592	0.0194063	0.133603	Sntg1
ENSMUSG00000084353.1	4.14449	0.0129667	0.2936	0.884936	0.973994	Gm15452
ENSMUSG00000103933.1	1.85479	0.0405658	0.342612	0.656222	NA	RP23-397E23.1
ENSMUSG00000076135.1	1.26264	0.0231984	0.369938	0.786284	NA	Gm24276
ENSMUSG00000061024.8	1177.54	-0.0324675	0.101351	0.610461	0.885841	Rrs1
ENSMUSG00000025911.14	160.973	0.0638893	0.128987	0.389915	0.759349	Adhfe1
ENSMUSG00000079671.8	9.59124	0.0136329	0.222983	0.871609	0.971054	2610203C22Rik
ENSMUSG00000081441.3	1.17592	-0.0179335	0.391202	0.822938	NA	Gm6161
ENSMUSG00000025912.16	1153.37	-0.0227099	0.0921866	0.702543	0.922025	Mybl1
ENSMUSG00000045210.8	2306.15	0.0405411	0.156726	0.603218	0.883192	Vcpip1
ENSMUSG00000097893.8	12.6888	0.0407426	0.247839	0.644654	0.901169	1700034P13Rik
ENSMUSG00000025915.14	1011.42	-0.220645	0.161302	0.0244197	0.156018	Sgk3
ENSMUSG00000046101.16	170.479	-0.0241253	0.119729	0.731181	0.93168	Mcmdc2
ENSMUSG00000098234.7	1099.7	-0.13102	0.151533	0.125708	0.440089	Snhg6
ENSMUSG00000093178.1	12.6635	-0.00266863	0.208224	0.974209	0.994238	Snord87
ENSMUSG00000099032.2	173.576	0.0225903	0.103819	0.727157	0.930158	Tcf24
ENSMUSG00000025916.10	3.54796	0.126945	0.428754	0.232272	0.609051	Ppp1r42
ENSMUSG00000025917.9	1677.27	-0.14186	0.110645	0.0554736	0.268461	Cops5
ENSMUSG00000056763.16	1375.43	-0.104062	0.106385	0.128382	0.445112	Cspp1
ENSMUSG00000102356.1	8.65536	0.00555448	0.229698	0.947842	0.988288	RP23-228G18.5
ENSMUSG00000067851.11	3267.93	0.0269444	0.142222	0.719996	0.928944	Arfgef1
ENSMUSG00000088153.1	5.52186	-0.00729353	0.264241	0.933949	0.985923	Gm26348
ENSMUSG00000102556.1	14.9315	0.0730189	0.283222	0.441782	0.79879	RP24-327F2.1
ENSMUSG00000048960.13	1575.52	0.0575313	0.084343	0.290686	0.6719	Prex2
ENSMUSG00000077318.1	1.51948	0.0371853	0.407051	0.637014	NA	Gm24173
ENSMUSG00000103494.1	1.48758	0.00668369	0.379147	0.935317	NA	RP23-366M5.2
ENSMUSG00000057715.13	164.411	-0.234459	0.175898	0.0228433	0.149059	A830018L16Rik
ENSMUSG00000103825.1	11.3217	-0.0474957	0.229502	0.585271	0.878034	RP23-2K13.1
ENSMUSG00000016918.15	232.556	-0.829635	0.17338	1.06617e-07	4.7236e-06	Sulf1
ENSMUSG00000025938.16	215.559	0.613572	0.21733	8.84097e-05	0.00180857	Slco5a1
ENSMUSG00000104518.1	1.46476	-0.0478532	0.384366	0.583623	NA	RP24-178B14.2
ENSMUSG00000069620.6	2.32546	0.0151999	0.323514	0.865275	0.969196	Gm5250
ENSMUSG00000099498.1	21.1472	-0.0658853	0.208744	0.446386	0.801228	Gm29283
ENSMUSG00000042414.7	2108.52	0.877625	0.10419	7.40845e-18	1.59465e-15	Prdm14
ENSMUSG00000005886.14	1763.53	0.0508	0.128004	0.488617	0.82805	Ncoa2
ENSMUSG00000103506.1	20.7382	0.12272	0.24053	0.210382	0.581966	RP23-93D12.2
ENSMUSG00000103495.1	6.82614	-0.058	0.282746	0.532509	0.852344	RP23-93D12.1
ENSMUSG00000102639.1	2.76368	-0.00734753	0.323703	0.934403	0.986002	RP23-125I14.4
ENSMUSG00000104170.1	4.74625	0.35442	0.651175	0.035493	0.199284	RP23-125I14.3
ENSMUSG00000103085.1	21.0692	0.0106027	0.223559	0.899961	0.977922	RP23-125I14.2
ENSMUSG00000102664.1	8.21787	0.0284675	0.304133	0.753651	0.938578	RP23-125I14.1
ENSMUSG00000025935.10	3975.93	0.00594572	0.109134	0.928952	0.984906	Tram1
ENSMUSG00000025937.6	4731.87	0.0350868	0.0850532	0.526238	0.848955	Lactb2
ENSMUSG00000102982.1	93.0923	0.0526839	0.193325	0.527587	0.849676	RP23-70F22.2
ENSMUSG00000067813.3	5.04678	0.159492	0.430458	0.173413	0.527042	Xkr9
ENSMUSG00000025932.14	524.651	-0.934753	0.121153	2.24646e-15	3.54809e-13	Eya1
ENSMUSG00000095853.1	2.19353	-0.261652	0.608833	0.0529261	0.260855	Gm22616
ENSMUSG00000102588.1	3.52051	-0.0273682	0.29441	0.762121	0.941206	RP24-291C20.1
ENSMUSG00000054493.2	10.7196	-2.41442	0.803876	9.88718e-06	0.000275787	Gm9947
ENSMUSG00000025930.6	100.633	-1.75335	0.325727	4.17833e-09	2.55351e-07	Msc
ENSMUSG00000103492.1	2.40639	-0.220279	0.571567	0.0717062	0.314708	RP23-398C14.1
ENSMUSG00000082193.1	6.29301	-0.00409523	0.253261	0.962507	0.991434	Rpl5-ps1
ENSMUSG00000032769.5	500.74	0.268914	0.139505	0.00559995	0.0539534	Trpa1
ENSMUSG00000073737.3	2.18737	-0.0849474	0.395779	0.376276	0.747787	Gm10566
ENSMUSG00000025925.14	1401.41	-0.106225	0.175987	0.222991	0.597337	Terf1
ENSMUSG00000104379.1	38.8171	0.0393598	0.186354	0.629144	0.894004	RP23-325F17.4
ENSMUSG00000032719.4	13.6024	-0.00664135	0.209073	0.935974	0.986104	Sbspon
ENSMUSG00000043716.13	46281.6	-0.0506865	0.128828	0.490787	0.828849	Rpl7
ENSMUSG00000025921.7	130.479	-0.0113157	0.124615	0.873883	0.971477	Rdh10
ENSMUSG00000025920.19	168.006	0.0129101	0.124505	0.856281	0.96665	Stau2
ENSMUSG00000025939.19	688.456	-0.0359409	0.104116	0.579968	0.874998	Ube2w
ENSMUSG00000102457.1	16.4708	0.310812	0.419581	0.0433467	0.22863	RP23-382H8.2
ENSMUSG00000079658.9	1957.72	0.137767	0.157697	0.115939	0.420015	Tceb1
ENSMUSG00000097744.1	1.46408	0.00050192	0.369439	0.995246	NA	D030040B21Rik
ENSMUSG00000025940.6	439.967	-0.0119473	0.105561	0.855028	0.966351	Tmem70
ENSMUSG00000025779.10	22.1627	0.662704	0.552334	0.00599003	0.0566688	Ly96
ENSMUSG00000091020.3	5.13822	-0.000585354	0.269933	0.994712	0.998077	Gm5828
ENSMUSG00000042686.5	77.5468	0.459983	0.281522	0.00332361	0.0361157	Jph1
ENSMUSG00000025777.8	4.46555	-0.0962127	0.328407	0.34254	0.720166	Gdap1
ENSMUSG00000100398.1	16.6964	0.769157	0.583413	0.00383956	0.0402022	Gm5251
ENSMUSG00000101589.1	6.66058	0.102469	0.315888	0.314747	0.694825	Rbm6-ps1
ENSMUSG00000102048.1	2.07975	-0.13481	0.44177	0.210102	0.581868	Gm6075
ENSMUSG00000067780.3	4.75383	0.105634	0.346545	0.308971	0.690029	Pi15
ENSMUSG00000085125.7	2.06909	-0.0060665	0.368136	0.942823	0.987389	Gm16070
ENSMUSG00000025776.13	30.5041	0.77477	0.456641	0.00171121	0.0213445	Crispld1
ENSMUSG00000099433.1	1.24056	-0.0224719	0.399491	0.774013	NA	Gm28344
ENSMUSG00000089787.2	2.56282	0.0767531	0.366349	0.427531	0.788867	Gm15825
ENSMUSG00000100720.1	1.31947	-0.0430152	0.382546	0.619214	NA	AC098736.2
ENSMUSG00000100204.1	2.10342	0.0907069	0.41767	0.336267	0.715848	Gm4849
ENSMUSG00000043760.16	20.2921	0.037892	0.194891	0.645551	0.901436	Pkhd1
ENSMUSG00000090142.2	1.71784	-0.0162873	0.371316	0.847332	NA	Gm15795
ENSMUSG00000041872.9	39.7557	0.689503	0.384697	0.0015125	0.0193014	Il17f
ENSMUSG00000041859.10	9768.61	-0.193687	0.112419	0.0164163	0.11886	Mcm3
ENSMUSG00000097934.1	2.9274	0.00554915	0.327774	0.95031	0.989077	6720483E21Rik
ENSMUSG00000025931.15	156.373	-0.0856472	0.124589	0.249294	0.628675	Paqr8
ENSMUSG00000041809.5	100.525	0.297597	0.225071	0.014285	0.107504	Efhc1
ENSMUSG00000041779.5	434.053	0.077234	0.266179	0.4116	0.776123	Tram2
ENSMUSG00000100819.1	3.50858	0.0254985	0.293722	0.777563	0.944517	Gm2693
ENSMUSG00000025933.15	128.422	-0.0350002	0.154823	0.651144	0.903003	Tmem14a
ENSMUSG00000102633.1	2.7764	-0.0490306	0.336511	0.597033	0.881114	RP23-278E1.4
ENSMUSG00000025934.15	377.699	0.0705995	0.134989	0.354503	0.730543	Gsta3
ENSMUSG00000099343.1	15.1605	-0.0281721	0.194516	0.730349	0.931237	Gm28836
ENSMUSG00000028033.16	7.61699	-0.103646	0.309242	0.308191	0.689485	Kcnq5
ENSMUSG00000082935.3	48.4942	0.0687855	0.163002	0.396714	0.763452	Gm7658
ENSMUSG00000041670.17	149.068	-0.354424	0.189222	0.0030273	0.0335153	Rims1
ENSMUSG00000102766.1	1.31118	0.0963324	0.441613	0.289483	NA	RP23-28L24.5
ENSMUSG00000065405.3	3.83006	0.0510671	0.328911	0.584048	0.877498	Mir30a
ENSMUSG00000097970.1	27.4398	0.113054	0.232598	0.236754	0.614048	Gm27028
ENSMUSG00000026158.11	371.76	0.183434	0.130513	0.0322487	0.187513	Ogfrl1
ENSMUSG00000026156.8	59.8338	-0.0169393	0.145863	0.822232	0.956377	B3gat2
ENSMUSG00000026155.13	653.953	-0.00813462	0.0959121	0.894492	0.97673	Smap1
ENSMUSG00000026154.4	341.589	-0.00165554	0.133589	0.981942	0.996367	1110058L19Rik
ENSMUSG00000026153.15	1162.69	0.108487	0.110617	0.124761	0.438339	Fam135a
ENSMUSG00000102398.1	3.891	0.0711298	0.31655	0.46075	0.810078	RP23-255J24.2
ENSMUSG00000026147.16	1.78598	0.112341	0.461522	0.22756	NA	Col9a1
ENSMUSG00000067736.2	3.9365	-0.0314682	0.292385	0.728527	0.930297	Gm10222
ENSMUSG00000101939.1	85.1364	-0.0554126	0.177771	0.4982	0.83375	Gm28438
ENSMUSG00000101111.1	52.599	0.0349923	0.164428	0.656302	0.905202	Gm28437
ENSMUSG00000100862.1	3.78288	-0.105427	0.360434	0.310256	0.691186	Gm10925
ENSMUSG00000102070.1	15.9609	-0.231709	0.364369	0.0787272	0.333429	Gm28661
ENSMUSG00000101249.1	24.8862	-0.113882	0.246552	0.241994	0.620865	Gm29216
ENSMUSG00000073725.8	549.648	0.182967	0.140628	0.0388087	0.211741	Lmbrd1
ENSMUSG00000033569.17	11.9605	0.124595	0.305935	0.236407	0.613814	Bai3
ENSMUSG00000103924.1	1.28037	-0.00164255	0.381762	0.983943	NA	RP23-184I13.4
ENSMUSG00000073722.3	1.89099	-0.0762783	0.365525	0.430113	NA	4931408C20Rik
ENSMUSG00000086240.4	30.6118	-0.0167455	0.182756	0.833992	0.959766	Gm7846
ENSMUSG00000099492.1	10.1829	-0.28655	0.427984	0.0551277	0.267639	Gm5525
ENSMUSG00000048874.15	6766.62	-0.209703	0.106781	0.00902103	0.0766394	Phf3
ENSMUSG00000103783.1	65.4026	-0.0495394	0.166421	0.535287	0.853757	RP24-172B22.6
ENSMUSG00000104315.1	82.6143	-0.152139	0.242062	0.138872	0.465903	RP23-471J16.2
ENSMUSG00000026064.16	103.439	-0.171837	0.181922	0.0748313	0.322831	Ptp4a1
ENSMUSG00000117310.2	5.48014	0.0159824	0.257549	0.855442	0.966517	NA
ENSMUSG00000117091.1	35.1747	2.16229	0.433478	2.03441e-08	1.09475e-06	NA
ENSMUSG00000086727.8	21.0522	2.20642	0.535659	7.72483e-07	2.79184e-05	4931428L18Rik
ENSMUSG00000099796.1	1.91485	-0.0433328	0.392928	0.607523	NA	Gm7893
ENSMUSG00000094215.2	25.6716	2.45064	0.488047	1.04925e-08	6.01906e-07	Gm6489
ENSMUSG00000070960.4	5.51849	0.0342227	0.291337	0.706421	0.92348	Gm10307
ENSMUSG00000026058.11	12.5642	0.9349	0.686875	0.00258704	0.0295652	Khdrbs2
ENSMUSG00000100481.1	1.08962	0.0779265	0.431789	0.361442	NA	Gm7114
ENSMUSG00000101754.2	2.27994	-0.0383005	0.446562	0.520429	0.845238	Gm2987
ENSMUSG00000100318.2	1.12885	0.0819603	0.433351	0.344573	NA	Gm18799
ENSMUSG00000026134.11	1866.37	-0.0278968	0.105653	0.670232	0.911446	Prim2
ENSMUSG00000101682.1	3.16518	0.0115017	0.329976	0.897309	0.97757	Gm29228
ENSMUSG00000102714.1	41.8268	0.0661035	0.214507	0.448493	0.802506	RP24-423J19.3
ENSMUSG00000102093.1	2.68989	0.0497163	0.326304	0.593398	0.88028	Gm17813
ENSMUSG00000103746.1	5.63313	0.0390603	0.267142	0.663787	0.908366	RP24-423J19.1
ENSMUSG00000004768.14	647.474	-0.0357394	0.146976	0.639591	0.898976	Rab23
ENSMUSG00000042215.8	173.601	0.120802	0.141615	0.141455	0.471833	Bag2
ENSMUSG00000042197.13	2100.56	-0.0131605	0.0899931	0.821885	0.956377	Zfp451
ENSMUSG00000081402.4	25.0507	0.509366	0.42832	0.00860527	0.0739859	Gm15455
ENSMUSG00000042182.16	38.0315	0.00297712	0.164909	0.969392	0.992992	Bend6
ENSMUSG00000104416.1	2.16448	0.100101	0.426596	0.298286	0.678818	RP23-32P22.2
ENSMUSG00000026131.20	22136.2	-0.04207	0.124568	0.559438	0.865819	Dst
ENSMUSG00000103596.1	4.67781	0.0447509	0.300206	0.627509	0.893223	RP23-87D8.2
ENSMUSG00000103364.1	33.6681	-0.0829867	0.20956	0.349161	0.725619	RP23-87D8.4
ENSMUSG00000105982.1	4.59843	-0.0357325	0.276337	0.69205	0.918867	NA
ENSMUSG00000096992.3	250.502	0.0733565	0.142815	0.348087	0.724781	Gm26788
ENSMUSG00000103001.1	33.3343	0.0574033	0.172377	0.480314	0.823751	RP24-422C24.3
ENSMUSG00000102336.1	28.7888	-0.0618033	0.188538	0.460377	0.810078	mmu-mir-5103
ENSMUSG00000042111.9	689.445	-0.153505	0.147396	0.0778217	0.331098	Ccdc115
ENSMUSG00000101711.1	1.75063	0.0361448	0.353235	0.686655	NA	Gm28306
ENSMUSG00000026127.13	1722.41	0.0411202	0.0994371	0.513102	0.841643	Imp4
ENSMUSG00000026126.15	49.2436	0.201937	0.245917	0.0694944	0.308676	Ptpn18
ENSMUSG00000100280.2	5.32352	0.0518971	0.27844	0.572355	0.872335	Gm28417
ENSMUSG00000026125.9	1.67969	0.0436432	0.401697	0.59522	NA	Prss39
ENSMUSG00000026124.4	1.84138	0.0770624	0.405227	0.401383	NA	Cfc1
ENSMUSG00000037529.13	1.7809	0.0243778	0.371741	0.775246	NA	Prss40
ENSMUSG00000037509.21	286.645	0.592123	0.171511	9.24075e-06	0.000260443	Arhgef4
ENSMUSG00000104002.2	59.1987	-0.193877	0.234615	0.0733631	0.318816	RP23-348C6.3
ENSMUSG00000037503.12	3365.23	-0.0526565	0.0910554	0.367841	0.740034	Fam168b
ENSMUSG00000104358.1	87.8624	-0.0930879	0.202853	0.296236	0.677105	RP23-348C6.1
ENSMUSG00000026123.11	882.326	-0.104553	0.10233	0.116433	0.421012	Plekhb2
ENSMUSG00000102531.1	3.55848	-0.0133368	0.2894	0.881528	0.972926	RP24-72B22.1
ENSMUSG00000102279.1	1.11233	-0.0235198	0.399982	0.763805	NA	RP24-424K5.3
ENSMUSG00000103708.1	9.39516	0.109095	0.318651	0.291047	0.6719	RP24-424K5.4
ENSMUSG00000102434.1	7.62181	-0.0738902	0.28584	0.437884	0.796265	RP24-424K5.2
ENSMUSG00000045216.7	1257.88	-0.813081	0.169393	9.33166e-08	4.18e-06	Hs6st1
ENSMUSG00000102202.1	20.037	0.115046	0.235599	0.2318	0.608477	RP23-173H19.3
ENSMUSG00000037470.14	6319.36	-0.0414854	0.0785224	0.417019	0.780663	Uggt1
ENSMUSG00000098752.1	1.91173	-0.000312909	0.393304	0.996818	NA	Mir6897
ENSMUSG00000047180.8	3.11212	0.0957631	0.368064	0.344909	0.7224	Neurl3
ENSMUSG00000037447.16	172.224	-0.0481814	0.113971	0.484908	0.826678	Arid5a
ENSMUSG00000102762.1	2.33889	-0.0993889	0.407785	0.316099	0.695923	RP23-134L6.5
ENSMUSG00000010453.12	1372.35	-0.0549135	0.0959173	0.368959	0.740634	Kansl3
ENSMUSG00000037432.15	104.061	0.0408224	0.168141	0.607445	0.88531	Fer1l5
ENSMUSG00000001143.13	255.236	0.00948667	0.162502	0.902428	0.978181	Lman2l
ENSMUSG00000037408.10	278.57	0.616239	0.173717	6.77464e-06	0.000198052	Cnnm4
ENSMUSG00000104316.1	6.51788	0.322065	0.532187	0.0489851	0.24817	RP23-294I17.4
ENSMUSG00000001138.13	672.519	0.0666807	0.134761	0.379842	0.75052	Cnnm3
ENSMUSG00000067653.12	24.5505	-0.0356889	0.175836	0.655641	0.905099	Ankrd23
ENSMUSG00000079610.9	199.079	0.0242455	0.10183	0.704479	0.923056	Ankrd39
ENSMUSG00000026121.13	86.7491	0.281661	0.247248	0.0226822	0.148506	Sema4c
ENSMUSG00000087589.3	11.5719	0.129013	0.27804	0.211668	0.583719	D430040D24Rik
ENSMUSG00000046337.17	571.561	0.0232103	0.0962813	0.705641	0.923183	Fam178b
ENSMUSG00000089906.1	4.80703	-0.00499647	0.272778	0.954988	0.990196	Gm6428
ENSMUSG00000061518.11	3233.64	-0.0356796	0.127014	0.622456	0.890745	Cox5b
ENSMUSG00000037351.9	2791.2	-0.0310594	0.102535	0.62877	0.893838	Actr1b
ENSMUSG00000102416.4	1.91866	0.0419986	0.392922	0.617291	NA	RP23-247A1.6
ENSMUSG00000026117.10	127.97	0.129135	0.14637	0.124994	0.438795	Zap70
ENSMUSG00000026116.11	3344.45	-0.00323122	0.187723	0.967864	0.992961	Tmem131
ENSMUSG00000103016.1	4.24314	-0.071526	0.299437	0.455178	0.806322	RP23-328J8.4
ENSMUSG00000102930.1	39.0352	-0.1027	0.251963	0.285975	0.666836	RP23-328J8.2
ENSMUSG00000103159.1	49.4292	-0.11777	0.22875	0.218874	0.592454	RP23-328J8.3
ENSMUSG00000050122.19	133.156	0.146549	0.16285	0.102314	0.390054	Vwa3b
ENSMUSG00000103603.1	3.95561	0.0515779	0.327659	0.580695	0.875379	RP23-259P18.1
ENSMUSG00000026114.14	159.961	1.05636	0.209329	4.43609e-08	2.17844e-06	Cnga3
ENSMUSG00000026113.17	237.883	0.0398783	0.236409	0.647211	0.902112	Inpp4a
ENSMUSG00000086064.1	1.95719	-0.0736063	0.380215	0.436744	0.795924	4930439A04Rik
ENSMUSG00000102879.1	1.21742	-0.223959	0.598339	0.0539134	NA	RP23-271C13.2
ENSMUSG00000026112.7	2043.04	-0.292238	0.131492	0.00240784	0.0279871	Coa5
ENSMUSG00000026111.15	1013.7	-0.0303861	0.129462	0.676612	0.912567	Unc50
ENSMUSG00000026110.15	439.731	0.274785	0.15807	0.00764756	0.0678379	Mgat4a
ENSMUSG00000103948.1	3.18045	0.0230801	0.358734	0.791442	0.947528	RP23-285H9.2
ENSMUSG00000026090.16	92.112	0.52849	0.320217	0.00270529	0.0306193	2010300C02Rik
ENSMUSG00000060771.15	126.467	0.0425333	0.126131	0.557465	0.865048	Tsga10
ENSMUSG00000037216.5	174.466	-0.0690218	0.134645	0.364162	0.738371	Lipt1
ENSMUSG00000026088.15	492.674	-0.165123	0.156571	0.0681366	0.304573	Mitd1
ENSMUSG00000026087.11	1196.13	-0.095976	0.141781	0.229484	0.606382	Mrpl30
ENSMUSG00000058407.12	2864.24	-0.0985847	0.11188	0.161606	0.505951	Txndc9
ENSMUSG00000026083.12	2035.53	0.0554669	0.203021	0.512998	0.841643	Eif5b
ENSMUSG00000026082.11	1352.61	-0.474128	0.131502	5.46299e-06	0.000162242	Rev1
ENSMUSG00000103804.1	49.252	-0.721439	0.370335	0.00100634	0.0138996	RP23-195A24.4
ENSMUSG00000037138.18	93.4332	1.12255	0.365072	5.45732e-05	0.00122114	Aff3
ENSMUSG00000085391.1	2.04864	0.338405	0.720777	0.0205405	0.138656	Gm16150
ENSMUSG00000048814.11	211.374	0.93375	0.211185	6.44664e-07	2.37578e-05	Lonrf2
ENSMUSG00000026080.13	208.113	0.417233	0.178379	0.000619724	0.00931041	Chst10
ENSMUSG00000026078.10	883.893	-0.10197	0.134837	0.194703	0.560094	Pdcl3
ENSMUSG00000103046.1	49.0221	-0.160636	0.220686	0.112292	0.413023	RP23-101P2.6
ENSMUSG00000103182.1	2.40355	-0.0674475	0.364559	0.476065	0.820757	RP24-226L19.2
ENSMUSG00000026077.15	23.8655	0.00390643	0.174589	0.960416	0.991434	Npas2
ENSMUSG00000073702.11	13893.4	-0.0472074	0.125328	0.514901	0.842543	Rpl31
ENSMUSG00000003134.10	1020.58	-0.330362	0.129481	0.000736967	0.0108506	Tbc1d8
ENSMUSG00000102607.1	5.25101	-0.401315	0.644085	0.0301337	0.179642	RP24-539E18.5
ENSMUSG00000003135.15	1836.62	-0.224927	0.154506	0.0202105	0.137122	Cnot11
ENSMUSG00000085894.1	45.144	0.127918	0.198055	0.169873	0.521102	Gm15832
ENSMUSG00000077704.1	18.9622	-0.0551066	0.204429	0.516372	0.843146	Snord89
ENSMUSG00000048234.13	921.869	0.0517472	0.108466	0.439648	0.797551	Rnf149
ENSMUSG00000064936.1	8.94764	-0.0401484	0.24917	0.649775	0.902546	Gm23722
ENSMUSG00000050967.5	62.8187	-0.415667	0.281709	0.00566449	0.0543531	Creg2
ENSMUSG00000097083.1	51.4241	-0.178356	0.242249	0.0954961	0.37427	D930019O06Rik
ENSMUSG00000057173.8	26.6321	-0.19264	0.271167	0.0892031	0.358685	Rfx8
ENSMUSG00000026074.15	3403.1	-0.353357	0.120911	0.000201418	0.00361023	Map4k4
ENSMUSG00000026073.13	8.06061	0.614764	0.696414	0.0111675	0.0890932	Il1r2
ENSMUSG00000026072.12	48.1591	0.975757	0.373225	0.000179124	0.00327582	Il1r1
ENSMUSG00000070942.8	43.3146	0.124515	0.233018	0.20079	0.568811	Il1rl2
ENSMUSG00000103230.1	1.28966	-0.143226	0.51367	0.124461	NA	RP23-100P14.3
ENSMUSG00000026062.12	3.14615	-0.161205	0.421866	0.171842	0.524169	Slc9a2
ENSMUSG00000103270.1	3.68294	0.0421953	0.32588	0.646746	0.901983	RP23-413K6.4
ENSMUSG00000041945.12	47.8487	-0.0261069	0.152929	0.733588	0.932045	Mfsd9
ENSMUSG00000060424.14	1.72067	-0.0196907	0.358547	0.820885	NA	Pantr1
ENSMUSG00000045515.4	37.3712	0.0466862	0.170892	0.560652	0.86664	Pou3f3
ENSMUSG00000060679.14	2429.39	-0.0387222	0.115477	0.576083	0.873822	Mrps9
ENSMUSG00000077448.1	3.62919	0.0653026	0.341914	0.493786	0.831196	Gm23126
ENSMUSG00000041907.9	5.75102	0.178793	0.420608	0.146029	0.479709	Gpr45
ENSMUSG00000070939.9	321.806	-0.189052	0.161763	0.0454062	0.235835	Tgfbrap1
ENSMUSG00000041878.3	9.12992	-0.0489279	0.245178	0.581609	0.876105	8430432A02Rik
ENSMUSG00000010290.7	1418.85	-0.0415629	0.107973	0.532482	0.852344	AI597479
ENSMUSG00000008136.14	14	0.0976069	0.266515	0.314433	0.694448	Fhl2
ENSMUSG00000094497.1	442.755	-0.0124623	0.138086	0.866372	0.969737	Gm8210
ENSMUSG00000099576.1	3.43868	0.0354207	0.302164	0.698029	0.920547	Gm29040
ENSMUSG00000066877.11	425.454	-0.0959085	0.140941	0.228626	0.605109	Nck2
ENSMUSG00000103422.1	3.6767	0.0199446	0.298843	0.824697	0.957046	RP23-389C9.3
ENSMUSG00000103945.1	23.9734	-0.0757552	0.246206	0.409643	0.774388	RP23-435E15.3
ENSMUSG00000026051.8	11.2052	0.0230393	0.21277	0.782776	0.94624	1500015O10Rik
ENSMUSG00000100764.1	1.36961	-0.0993678	0.442398	0.280948	NA	Gm29155
ENSMUSG00000100635.1	1.71574	-0.0986378	0.430635	0.297976	NA	Gm29157
ENSMUSG00000100480.1	7.50882	-0.0141676	0.23878	0.869146	0.970551	Gm29156
ENSMUSG00000057363.12	504.288	0.0249531	0.0903099	0.669603	0.911299	Uxs1
ENSMUSG00000090243.1	6.04735	-0.0863699	0.31797	0.383534	0.753391	Gm16103
ENSMUSG00000100701.1	3.6688	-0.0518498	0.318311	0.579059	0.874948	Gm19587
ENSMUSG00000041763.14	5221.99	0.0134742	0.0784953	0.79609	0.949271	Tpp2
ENSMUSG00000047343.4	27.096	0.0947688	0.214962	0.296753	0.677485	Mettl21c
ENSMUSG00000091844.2	19.2371	0.0684386	0.23735	0.447195	0.801844	Gm8251
ENSMUSG00000026049.11	448.997	0.0714714	0.128538	0.338283	0.716742	Tex30
ENSMUSG00000026047.13	514.86	-0.00264592	0.0840233	0.961907	0.991434	Kdelc1
ENSMUSG00000041684.11	736.832	-0.0715542	0.105845	0.280671	0.660984	Bivm
ENSMUSG00000026048.16	1032.02	-0.274901	0.146774	0.00588537	0.0560493	Ercc5
ENSMUSG00000101567.1	1.56769	-0.0434334	0.358971	0.630069	NA	Txn-ps1
ENSMUSG00000056870.9	157.723	0.117541	0.164731	0.175091	0.530553	Gulp1
ENSMUSG00000102319.1	14.2594	0.070559	0.264617	0.448233	0.802506	RP23-68D4.1
ENSMUSG00000101701.1	2.6014	-0.100406	0.386547	0.32325	0.701814	4930521E06Rik
ENSMUSG00000026043.18	1.31814	0.15233	0.517409	0.119999	NA	Col3a1
ENSMUSG00000026042.16	43.7777	1.59213	0.337735	1.36357e-07	5.90145e-06	Col5a2
ENSMUSG00000025995.16	5070.37	0.0128	0.105773	0.845004	0.963451	Wdr75
ENSMUSG00000099850.1	1.49486	-0.000419264	0.356971	0.996123	NA	Gm28906
ENSMUSG00000084817.3	12.2223	0.13883	0.310984	0.199878	0.567483	Gm5526
ENSMUSG00000025993.10	91.6185	1.20123	0.276542	9.14729e-07	3.2671e-05	Slc40a1
ENSMUSG00000041144.12	23.0069	1.18066	0.535576	0.000373949	0.00613866	Dnah7b
ENSMUSG00000101262.1	1.49477	0.0740499	0.404769	0.415248	NA	Gm8326
ENSMUSG00000101337.6	43.8205	0.810703	0.358862	0.000447425	0.00713893	Dnah7c
ENSMUSG00000025986.6	2607.59	-0.00914673	0.0691056	0.843923	0.963451	Slc39a10
ENSMUSG00000100213.1	18.6943	-0.0608705	0.204056	0.476234	0.820757	Gm28151
ENSMUSG00000101447.1	2.39379	0.420672	0.784555	0.0143563	0.107855	Gm28826
ENSMUSG00000100033.1	2.45883	-0.0158742	0.314908	0.859763	0.967574	Gm8337
ENSMUSG00000100816.1	1.85263	0.43322	0.82458	0.0089881	NA	Gm28321
ENSMUSG00000026109.14	19.0784	0.469688	0.463949	0.0141242	0.106525	Tmeff2
ENSMUSG00000045954.7	2.55001	0.289441	0.645515	0.039711	0.215317	Sdpr
ENSMUSG00000026107.11	2058.9	-0.280318	0.117366	0.00189166	0.0231676	Nabp1
ENSMUSG00000099413.1	9.16646	0.233034	0.400587	0.0850637	0.349136	Gm17767
ENSMUSG00000101741.1	10.7947	0.014971	0.212015	0.85717	0.966962	Gm28055
ENSMUSG00000018417.14	3359.98	0.0353391	0.0776669	0.486884	0.827438	Myo1b
ENSMUSG00000101724.1	7.65881	0.182765	0.424973	0.140818	0.470922	Gm29453
ENSMUSG00000100313.1	15.2469	0.0287359	0.224653	0.735792	0.932806	Gm28323
ENSMUSG00000072324.4	7.69337	-0.0742897	0.277891	0.432703	0.792815	Gm8420
ENSMUSG00000062939.11	155.022	-0.0185799	0.127109	0.796352	0.949369	Stat4
ENSMUSG00000078291.1	1.14639	0.0527744	0.394156	0.54198	NA	Gm3940
ENSMUSG00000109599.1	5.0948	-0.0499438	0.282394	0.587068	0.878673	NA
ENSMUSG00000026104.14	133.342	-0.141438	0.158704	0.109052	0.405763	Stat1
ENSMUSG00000099569.1	3.01266	-0.166659	0.447747	0.159656	0.503346	Gm18301
ENSMUSG00000026103.14	3520.06	-0.218882	0.148788	0.0208294	0.139838	Gls
ENSMUSG00000002881.14	384.91	0.475559	0.151833	3.47726e-05	0.000829191	Nab1
ENSMUSG00000097833.1	4.3217	0.0352046	0.298311	0.69942	0.92103	Gm5976
ENSMUSG00000043015.15	613.44	-0.203937	0.124445	0.0177057	0.125191	Tmem194b
ENSMUSG00000103630.1	6.35304	-0.0603772	0.27678	0.515245	0.842873	RP24-388H6.6
ENSMUSG00000041439.15	120.488	0.0912351	0.152816	0.264186	0.644385	Mfsd6
ENSMUSG00000026102.9	91.4383	-0.493358	0.28521	0.00238373	0.0278102	Inpp1
ENSMUSG00000041426.12	550.349	-0.280598	0.180136	0.0102602	0.0843959	Hibch
ENSMUSG00000089802.1	2.68192	-0.129434	0.414788	0.232868	0.609889	Gm16107
ENSMUSG00000043629.12	1206.67	-0.768969	0.120665	1.63196e-11	1.4382e-09	1700019D03Rik
ENSMUSG00000060715.9	8.33315	0.0895345	0.272042	0.352796	0.728813	1700019A02Rik
ENSMUSG00000026098.13	1059.02	0.0144902	0.092737	0.808576	0.952186	Pms1
ENSMUSG00000100763.1	5.68688	-0.0212259	0.27792	0.812184	0.953185	Gm28777
ENSMUSG00000026097.9	722.691	-0.0241343	0.11859	0.729876	0.930878	Ormdl1
ENSMUSG00000026096.14	409.491	-0.0143209	0.0943705	0.813177	0.953358	Osgepl1
ENSMUSG00000099913.1	4.78867	0.0712856	0.322414	0.460535	0.810078	Gm28551
ENSMUSG00000101838.6	3.68595	0.115139	0.389062	0.276099	0.657322	Gm18800
ENSMUSG00000026095.15	447.15	0.00213341	0.121619	0.975851	0.9948	Asnsd1
ENSMUSG00000096141.2	9.46321	0.470955	0.572821	0.0199375	0.135952	Dnah7a
ENSMUSG00000026094.14	760.458	0.129606	0.155723	0.133198	0.454704	Stk17b
ENSMUSG00000042807.15	100.327	1.68148	0.229428	1.59697e-14	2.17833e-12	Hecw2
ENSMUSG00000025983.11	24.5855	-0.0342448	0.180416	0.670431	0.911446	Ccdc150
ENSMUSG00000041303.7	3265.45	-0.0083933	0.097158	0.892141	0.9758	Gtf3c3
ENSMUSG00000073678.4	2218.24	-0.539257	0.139713	1.59654e-06	5.40093e-05	Pgap1
ENSMUSG00000104136.1	14.567	-0.0244647	0.224148	0.773187	0.943517	RP24-290F15.1
ENSMUSG00000052331.14	30.5108	0.899035	0.402166	0.000450908	0.00717763	Ankrd44
ENSMUSG00000025982.13	20380	-0.0187356	0.0920662	0.75264	0.938071	Sf3b1
ENSMUSG00000103030.1	3.59202	0.170968	0.43675	0.155865	0.496281	RP23-16N14.2
ENSMUSG00000025981.13	644.901	-0.0289128	0.117478	0.678113	0.913404	Coq10b
ENSMUSG00000101122.1	17.1149	0.0117325	0.193104	0.884755	0.973938	Gm17971
ENSMUSG00000025980.14	12096.2	-0.0547261	0.121614	0.445582	0.800522	Hspd1
ENSMUSG00000073676.4	5381.62	-0.0121399	0.132669	0.86803	0.970315	Hspe1
ENSMUSG00000089670.1	2.00535	-0.0722857	0.363498	0.450809	0.804541	Gm16581
ENSMUSG00000025979.13	1744.7	-0.0656256	0.118632	0.356987	0.732562	Mob4
ENSMUSG00000061863.6	6.59906	0.12259	0.346369	0.254071	0.633997	Gm6822
ENSMUSG00000025978.14	78.7123	-0.152593	0.201389	0.116146	0.420554	Rftn2
ENSMUSG00000097649.2	5.30903	-0.00994197	0.267867	0.910357	0.979898	Gm10561
ENSMUSG00000046994.9	1073.94	-0.141625	0.123575	0.0724292	0.316567	Mars2
ENSMUSG00000025977.15	87.6672	0.328435	0.262302	0.0137872	0.104372	Boll
ENSMUSG00000100215.1	46.8316	-0.208775	0.249877	0.064495	0.295037	Gm8292
ENSMUSG00000101085.1	4.37404	0.00148738	0.275358	0.986612	0.996732	Gm8531
ENSMUSG00000038349.10	16.0337	0.424918	0.514694	0.0234543	0.151543	Plcl1
ENSMUSG00000099950.1	1.85454	0.211284	0.553686	0.0831386	NA	9130227L01Rik
ENSMUSG00000038331.15	189.601	-0.0475571	0.174974	0.556127	0.864214	Satb2
ENSMUSG00000087022.4	14.0034	-0.00557828	0.206744	0.946025	0.988111	9130024F11Rik
ENSMUSG00000097519.2	76.3427	-0.23664	0.218936	0.0344967	0.194999	4930558J18Rik
ENSMUSG00000038323.3	469.565	-0.130379	0.150207	0.12594	0.440395	1700066M21Rik
ENSMUSG00000048495.16	395.69	-0.049545	0.134794	0.508208	0.839163	Tyw5
ENSMUSG00000025971.6	358.189	-0.146291	0.126689	0.0687393	0.306442	9430016H08Rik
ENSMUSG00000038305.15	158.726	-0.729697	0.205555	9.55001e-06	0.000268227	Spats2l
ENSMUSG00000054770.16	626.86	-0.0819471	0.109012	0.229427	0.606321	Kctd18
ENSMUSG00000026039.9	1713.94	-0.370934	0.118687	8.56319e-05	0.0017681	Sgol2
ENSMUSG00000063558.4	112.409	0.123751	0.166684	0.158457	0.501516	Aox1
ENSMUSG00000064294.12	264.588	-0.101689	0.126735	0.182018	0.540682	Aox3
ENSMUSG00000038242.12	20.582	2.25485	0.475342	5.5541e-08	2.64887e-06	Aox4
ENSMUSG00000079554.2	6.33807	0.153189	0.373571	0.184611	0.544491	Aox2
ENSMUSG00000103839.1	43.1739	-0.247806	0.277152	0.044675	0.233483	RP24-191N24.2
ENSMUSG00000051223.14	11617.7	0.00291885	0.0970891	0.962375	0.991434	Bzw1
ENSMUSG00000026034.17	3380.48	-0.0474454	0.0995487	0.450935	0.804553	Clk1
ENSMUSG00000026035.15	586.738	-0.0990104	0.144578	0.220321	0.593911	Ppil3
ENSMUSG00000026036.17	933.197	-0.0724584	0.108081	0.282119	0.661887	Nif3l1
ENSMUSG00000026037.14	3758.05	0.104965	0.132093	0.179014	0.536225	Orc2
ENSMUSG00000094245.1	4.11699	0.0534678	0.309622	0.567716	0.870049	Gm23966
ENSMUSG00000085054.2	12.6281	0.335776	0.444649	0.0377734	0.207724	Gm15834
ENSMUSG00000038174.14	1527.85	0.00892083	0.0895348	0.878302	0.9724	Fam126b
ENSMUSG00000026032.8	925.59	-0.0187871	0.13141	0.796731	0.949376	Ndufb3
ENSMUSG00000047528.13	4.41331	0.02906	0.281387	0.746768	0.936522	Als2cr12
ENSMUSG00000026031.15	364.839	-0.0511185	0.10908	0.446829	0.801492	Cflar
ENSMUSG00000026029.14	223.93	0.234948	0.170681	0.0211111	0.141262	Casp8
ENSMUSG00000102719.1	5.58678	0.333544	0.608427	0.0433445	0.22863	RP24-273P12.4
ENSMUSG00000099719.1	1.69503	0.0828592	0.423999	0.355959	NA	Gm28802
ENSMUSG00000026028.12	1716.35	0.173022	0.104115	0.021368	0.142471	Trak2
ENSMUSG00000026027.13	289.403	-0.0198456	0.105904	0.762102	0.941206	Stradb
ENSMUSG00000072295.7	9.97827	0.113854	0.294857	0.266004	0.646323	Als2cr11
ENSMUSG00000038079.14	390.161	-0.0560913	0.112958	0.415185	0.779269	Tmem237
ENSMUSG00000097573.2	7.89295	-0.0992318	0.292971	0.319703	0.698618	G730003C15Rik
ENSMUSG00000079550.9	23.917	0.780058	0.480999	0.00200576	0.0242597	Mpp4
ENSMUSG00000101586.1	32.6811	0.0748552	0.186768	0.377977	0.748838	Gm29017
ENSMUSG00000099563.1	2.09338	-0.0309226	0.366452	0.722752	0.929833	Gm19125
ENSMUSG00000026024.14	2932.4	0.0606399	0.0852573	0.27034	0.650973	Als2
ENSMUSG00000099922.1	2.25117	0.254402	0.604079	0.0549201	0.267071	Gm29016
ENSMUSG00000041075.8	629.638	0.654288	0.135085	2.81782e-08	1.46448e-06	Fzd7
ENSMUSG00000097819.1	8.13082	0.23218	0.406642	0.0868057	0.353132	Gm26813
ENSMUSG00000047361.16	33.8538	0.316572	0.372972	0.0342409	0.194	Gm973
ENSMUSG00000026021.15	3803.35	0.0372747	0.122341	0.601125	0.882657	Sumo1
ENSMUSG00000103821.1	60.0041	-0.018492	0.150757	0.808081	0.952186	RP24-147G7.2
ENSMUSG00000101400.1	4.24109	0.0933733	0.349887	0.356056	0.731869	Gm29596
ENSMUSG00000026020.9	8132.8	-0.085666	0.11719	0.232443	0.609303	Nop58
ENSMUSG00000077345.1	47.7977	-0.0558708	0.167048	0.487758	0.827824	Snord70
ENSMUSG00000089512.3	22.4065	-0.0355917	0.195575	0.665424	0.909008	Gm26287
ENSMUSG00000089093.3	15.7224	-0.0392169	0.204749	0.639032	0.898896	Snord11
ENSMUSG00000067336.6	1278.53	0.0662352	0.15748	0.40841	0.773176	Bmpr2
ENSMUSG00000104052.1	7.25804	0.0335252	0.328303	0.712389	0.925808	RP24-178N19.2
ENSMUSG00000041040.12	1398.15	0.0842678	0.129144	0.265316	0.645815	Fam117b
ENSMUSG00000103696.1	28.9383	0.0838646	0.242647	0.36487	0.73892	RP23-27C10.2
ENSMUSG00000100901.1	9.60583	-0.110179	0.28629	0.275108	0.656732	Gm18829
ENSMUSG00000026018.12	63.9815	0.905382	0.30107	6.63611e-05	0.00142967	Ica1l
ENSMUSG00000026019.15	2038.66	-0.106477	0.108485	0.125932	0.440395	Wdr12
ENSMUSG00000026017.13	483.391	0.00420067	0.0924143	0.943907	0.987621	Carf
ENSMUSG00000082609.1	10.1258	-0.046356	0.232364	0.595183	0.880805	Gm15464
ENSMUSG00000073664.11	3637.55	0.0622736	0.107357	0.350731	0.72677	Nbeal1
ENSMUSG00000049439.13	791.999	-0.0493729	0.112591	0.47115	0.817274	Cyp20a1
ENSMUSG00000103822.1	10.995	0.0322931	0.229426	0.706904	0.923595	RP23-264G9.1
ENSMUSG00000026782.15	1697.34	-0.00885124	0.0759611	0.861485	0.967904	Abi2
ENSMUSG00000026014.15	1672.8	-0.0408838	0.148971	0.595054	0.880805	Raph1
ENSMUSG00000081562.1	2.48388	-0.0810281	0.366893	0.407165	0.772628	Gm11575
ENSMUSG00000084400.1	1.74844	0.0144928	0.371569	0.863668	NA	Gm11576
ENSMUSG00000101188.1	173.208	-0.0430465	0.150506	0.577524	0.87449	Eif4a-ps4
ENSMUSG00000081382.1	1.38026	-0.0535246	0.384022	0.546497	NA	Rpl18-ps1
ENSMUSG00000052062.14	22.9605	0.0648048	0.208439	0.453077	0.805806	Pard3b
ENSMUSG00000103656.1	1.56158	0.0401866	0.35275	0.65618	NA	RP23-327M13.2
ENSMUSG00000104402.1	1.34392	0.0270534	0.406955	0.723719	NA	RP23-327M13.3
ENSMUSG00000084333.1	1.39778	0.0643592	0.378409	0.48613	NA	Gm11599
ENSMUSG00000025969.15	345.89	-1.16917	0.149621	6.49789e-16	1.08252e-13	Nrp2
ENSMUSG00000103032.1	3.84859	-0.247919	0.569103	0.069294	0.30818	RP23-149A5.4
ENSMUSG00000040865.15	2240.88	0.0662185	0.171298	0.419553	0.782882	Ino80d
ENSMUSG00000081429.1	2.73636	-0.125946	0.440514	0.22694	0.603211	Rps27-ps1
ENSMUSG00000084799.7	70.5178	-0.0494286	0.150603	0.524821	0.84823	Ino80dos
ENSMUSG00000101599.1	323.199	-0.0197708	0.131308	0.786346	0.946799	Gm20342
ENSMUSG00000025968.16	3820.01	0.00565105	0.111144	0.933155	0.985913	Ndufs1
ENSMUSG00000077884.2	4.18498	-0.0854487	0.322856	0.388724	0.75856	Gm24557
ENSMUSG00000025967.16	14093.4	-0.0834833	0.130009	0.271021	0.651709	Eef1b2
ENSMUSG00000064612.2	2.49716	0.0122899	0.311726	0.891057	0.975753	Gm26457
ENSMUSG00000064602.1	32.6519	-0.0828827	0.17654	0.326661	0.704434	Snora41
ENSMUSG00000046856.13	36.091	0.19493	0.271215	0.0865518	0.352441	Gpr1
ENSMUSG00000086730.2	61.4912	-0.0764862	0.157926	0.345897	0.723162	Gm11607
ENSMUSG00000102536.1	5.76856	-0.121097	0.360157	0.260287	0.639943	RP23-434D24.3
ENSMUSG00000087561.7	10.0335	0.0604736	0.248261	0.502923	0.836227	Gm11608
ENSMUSG00000027520.16	2076.71	-0.0147594	0.19654	0.856146	0.96665	Zdbf2
ENSMUSG00000094214.1	1.67493	0.236777	0.610391	0.0491261	NA	Gm23448
ENSMUSG00000081643.1	2.53916	-0.00614012	0.336906	0.94468	0.987621	Gm11605
ENSMUSG00000025964.15	841.117	0.421444	0.207122	0.00137608	0.0179082	Adam23
ENSMUSG00000025963.5	3.54199	-0.0486178	0.317165	0.601167	0.882662	Mdh1b
ENSMUSG00000025962.15	1856.76	-0.0812094	0.12904	0.281523	0.661497	Fastkd2
ENSMUSG00000025961.1	21.1993	0.0620118	0.201436	0.467029	0.814484	4933402D24Rik
ENSMUSG00000025959.13	335.432	0.119299	0.162393	0.167647	0.516816	Klf7
ENSMUSG00000086836.1	3.04645	0.0487653	0.338968	0.598446	0.881861	Gm13748
ENSMUSG00000025958.14	1362.68	-0.0681278	0.109173	0.314199	0.693994	Creb1
ENSMUSG00000025956.10	394.497	0.0550661	0.11993	0.439486	0.797551	Mettl21a
ENSMUSG00000101832.1	4.05725	-0.00843989	0.307461	0.924979	0.983559	Gm28982
ENSMUSG00000087213.2	123.408	0.0482405	0.132836	0.516639	0.843146	2810408I11Rik
ENSMUSG00000070871.10	544.478	-0.0364508	0.0941852	0.545669	0.860051	Ccnyl1
ENSMUSG00000045005.9	2688.65	-0.943409	0.149987	4.70713e-11	3.89427e-09	Fzd5
ENSMUSG00000102140.1	6.1463	-0.0637218	0.299598	0.500768	0.834979	RP24-388P13.2
ENSMUSG00000051344.13	716.983	0.383036	0.20293	0.0024413	0.0282358	Plekhm3
ENSMUSG00000097264.1	1.25127	-0.0529898	0.387572	0.546913	NA	Rpl31-ps24
ENSMUSG00000084416.3	206.743	-0.0180101	0.118854	0.796578	0.949376	Rpl10a-ps1
ENSMUSG00000025955.13	9.33431	0.606346	0.681304	0.0114398	0.090635	Akr1cl
ENSMUSG00000090042.1	1.82777	0.0449212	0.379027	0.608202	NA	Gm8550
ENSMUSG00000070870.6	11.5976	0.256589	0.434618	0.0729461	0.317912	Cryge
ENSMUSG00000067299.11	5.89393	0.164381	0.390844	0.166263	0.514722	Crygd
ENSMUSG00000025952.15	1.70744	0.204695	0.552694	0.0844705	NA	Crygc
ENSMUSG00000044429.8	5.7364	0.0529281	0.27194	0.563233	0.867161	Cryga
ENSMUSG00000044816.10	129.931	0.15126	0.177593	0.104035	0.39415	D630023F18Rik
ENSMUSG00000025950.16	6878.85	0.199677	0.179093	0.0446558	0.233433	Idh1
ENSMUSG00000025949.16	6473.6	0.0285252	0.0722378	0.549216	0.861952	Pikfyve
ENSMUSG00000025946.13	2.12066	0.0085354	0.335566	0.923301	0.983253	Pth2r
ENSMUSG00000015222.18	195.153	0.0149189	0.124531	0.834302	0.959945	Map2
ENSMUSG00000055567.18	20.3314	0.565901	0.482402	0.00781753	0.0689349	Unc80
ENSMUSG00000026005.15	2636.54	-0.0171429	0.103274	0.790427	0.947518	Rpe
ENSMUSG00000026004.15	632.494	0.0188345	0.105262	0.773027	0.943495	Kansl1l
ENSMUSG00000102559.1	48.7819	-0.141922	0.243025	0.161205	0.505608	RP24-429G21.5
ENSMUSG00000102374.1	41.2151	-0.0257939	0.18297	0.748018	0.936522	RP24-429G21.4
ENSMUSG00000102776.1	35.2352	-0.0374038	0.185131	0.645153	0.901324	RP24-429G21.3
ENSMUSG00000082057.1	17.8061	-0.0895991	0.24738	0.33974	0.717946	Gm15789
ENSMUSG00000103756.1	32.3939	-0.0448965	0.182417	0.581543	0.87606	RP24-429G21.1
ENSMUSG00000103382.1	31.4921	0.0146438	0.212377	0.860311	0.967574	RP24-429G21.6
ENSMUSG00000103553.1	3.88441	0.0461477	0.314016	0.618482	0.889334	RP24-429G21.7
ENSMUSG00000026003.5	314.69	0.0914753	0.185082	0.291092	0.671939	Acadl
ENSMUSG00000082769.3	1.29155	-0.199876	0.569469	0.0706359	NA	Gm15793
ENSMUSG00000026000.16	972.212	-0.105232	0.120648	0.157147	0.499108	Lancl1
ENSMUSG00000025991.8	64.1713	0.14114	0.190164	0.13247	0.453367	Cps1
ENSMUSG00000101387.1	6.5387	0.0772253	0.281086	0.41803	0.781682	Pced1c-ps
ENSMUSG00000101156.1	2.20104	-0.0879713	0.429613	0.330777	0.709287	Gm29114
ENSMUSG00000025997.13	84.8959	-0.171096	0.20938	0.0902166	0.36089	Ikzf2
ENSMUSG00000053153.14	33.2834	1.01867	0.432965	0.00031857	0.00536233	Spag16
ENSMUSG00000026196.7	1512.24	0.0241994	0.136929	0.744175	0.936522	Bard1
ENSMUSG00000089965.1	10.2833	0.0133466	0.261531	0.879382	0.972557	Gm16236
ENSMUSG00000050296.14	5.40079	0.418178	0.62795	0.0281815	0.171665	Abca12
ENSMUSG00000026192.13	4471.01	-0.0379685	0.0864987	0.498709	0.834257	Atic
ENSMUSG00000026193.15	28946.8	-0.0205253	0.186709	0.798712	0.949618	Fn1
ENSMUSG00000073652.10	52.2867	-0.0248289	0.149287	0.744387	0.936522	Apol7d
ENSMUSG00000101834.1	1.85396	0.0824846	0.43385	0.341959	NA	Gm5829
ENSMUSG00000100319.1	7.35086	0.0658465	0.272051	0.479368	0.823307	Gm5256
ENSMUSG00000101496.1	2.29645	-0.00142375	0.343001	0.987077	0.996732	Gm8885
ENSMUSG00000039395.8	6085.96	1.72472	0.11573	2.51197e-51	7.63732e-48	Mreg
ENSMUSG00000094655.1	990.23	-0.126044	0.318224	0.236598	0.613963	Gm25360
ENSMUSG00000094050.1	15.5495	0.0559825	0.234428	0.526385	0.848967	Gm23472
ENSMUSG00000093956.1	14.0401	0.0575807	0.232268	0.514313	0.8424	Gm24497
ENSMUSG00000093843.1	10.5756	-0.0569931	0.235527	0.519985	0.844735	Gm25939
ENSMUSG00000026189.13	357.723	0.108894	0.140522	0.177426	0.533968	Pecr
ENSMUSG00000026188.11	8.82922	0.0939313	0.281552	0.337312	0.716301	Tmem169
ENSMUSG00000026187.9	3943.31	0.0195069	0.0931338	0.744959	0.936522	Xrcc5
ENSMUSG00000039372.5	3.2735	0.281309	0.581855	0.0582263	0.27713	2023-03-04
ENSMUSG00000039354.16	1078.56	-0.271106	0.101972	0.00110887	0.0150718	Smarcal1
ENSMUSG00000110712.1	11.8008	-0.0869127	0.253851	0.356035	0.731869	NA
ENSMUSG00000046330.10	15586.3	-0.0393123	0.129563	0.591307	0.879681	Rpl37a
ENSMUSG00000039323.18	16151.3	0.148603	0.1514	0.0893142	0.358895	Igfbp2
ENSMUSG00000026185.8	45.7312	0.280713	0.291414	0.032282	0.18752	Igfbp5
ENSMUSG00000101968.6	1.49172	0.121215	0.480707	0.186253	NA	1700027A15Rik
ENSMUSG00000100301.6	26.1583	0.149188	0.240438	0.144023	0.475832	6030407O03Rik
ENSMUSG00000101344.1	22.4361	0.0282627	0.190479	0.72805	0.930251	Gm29183
ENSMUSG00000098504.1	1.12562	-0.0891568	0.458181	0.27274	NA	Mir6351
ENSMUSG00000055322.16	1261.55	-0.0670452	0.164409	0.408946	0.773648	Tns1
ENSMUSG00000061815.11	11.1949	-0.542233	0.590084	0.0136082	0.103306	Rufy4
ENSMUSG00000006304.14	3603.01	-0.0324669	0.0998822	0.606762	0.885045	Arpc2
ENSMUSG00000064272.3	13.6714	0.0062514	0.218708	0.940493	0.986986	Gpbar1
ENSMUSG00000006299.13	3468.39	-0.0183108	0.114691	0.789596	0.947518	Aamp
ENSMUSG00000026179.14	548.991	-0.0395309	0.0915606	0.502212	0.8357	Pnkd
ENSMUSG00000103013.1	8.67866	-0.0487657	0.238259	0.5798	0.874948	RP23-280F6.5
ENSMUSG00000006301.17	729.625	-0.480246	0.145291	1.77059e-05	0.000462083	Tmbim1
ENSMUSG00000103403.1	15.2994	-0.173376	0.323212	0.135136	0.458298	RP23-280F6.6
ENSMUSG00000073650.8	62.4845	-1.18836	0.299386	3.72121e-06	0.000115475	Catip
ENSMUSG00000026177.11	227.703	-2.26776	0.174404	6.08389e-40	1.05699e-36	Slc11a1
ENSMUSG00000026176.13	319.196	-0.392876	0.299278	0.00904528	0.0767918	Ctdsp1
ENSMUSG00000065468.1	3.77823	0.0701583	0.324712	0.466924	0.814484	Mir26b
ENSMUSG00000026175.12	108.126	0.177059	0.181227	0.0679432	0.304007	Vil1
ENSMUSG00000033364.13	5772.05	-0.0319167	0.0704781	0.489992	0.828697	Usp37
ENSMUSG00000103227.1	64.6015	0.0354243	0.182917	0.661221	0.906895	RP23-102B12.2
ENSMUSG00000026174.9	2928.4	-0.100118	0.103382	0.133508	0.455273	Rqcd1
ENSMUSG00000026173.15	21.1691	0.527608	0.525033	0.0121923	0.0948059	Plcd4
ENSMUSG00000026135.17	688.097	0.0222818	0.148272	0.76912	0.942908	Zfp142
ENSMUSG00000093155.1	8.95202	-0.109261	0.279029	0.275081	0.656732	Gm25035
ENSMUSG00000026172.12	311.076	-0.431512	0.180322	0.00049033	0.00766425	Bcs1l
ENSMUSG00000026171.12	893.985	-0.0883146	0.123468	0.233634	0.610978	Rnf25
ENSMUSG00000033276.18	73.4296	-0.00589876	0.176044	0.940399	0.986983	Stk36
ENSMUSG00000033257.14	2525.29	0.185108	0.129242	0.0303042	0.180394	Ttll4
ENSMUSG00000026170.6	164.101	0.166789	0.163762	0.0707074	0.311846	Cyp27a1
ENSMUSG00000006542.13	5.15443	0.735426	0.972245	0.0044621	0.0453477	Prkag3
ENSMUSG00000033227.7	34.0423	0.0630812	0.198046	0.457876	0.808076	Wnt6
ENSMUSG00000099472.1	3.37676	0.243515	0.537897	0.0791653	0.334576	Gm29539
ENSMUSG00000026167.14	5.37047	0.168098	0.405221	0.161245	0.505669	Wnt10a
ENSMUSG00000090071.4	21.7084	0.283972	0.392439	0.0508425	0.254226	Cdk5r2
ENSMUSG00000047021.14	1.33807	0.0837438	0.41262	0.366498	NA	Ccdc108
ENSMUSG00000006538.12	6.48236	0.0998459	0.330695	0.328413	0.70681	Ihh
ENSMUSG00000026162.7	189.425	0.0388859	0.129933	0.595677	0.880888	Nhej1
ENSMUSG00000026205.8	4.39894	0.0718011	0.331077	0.458169	0.808138	Slc23a3
ENSMUSG00000033159.14	793.737	0.0580274	0.109605	0.390495	0.759597	Cnppd1
ENSMUSG00000049339.16	642.089	-0.00692854	0.0760465	0.891534	0.9758	Fam134a
ENSMUSG00000026197.12	156.144	-0.457837	0.218112	0.000994505	0.013791	Zfand2b
ENSMUSG00000026198.15	87.6598	0.125054	0.167402	0.155435	0.495693	Abcb6
ENSMUSG00000033124.16	290.089	-0.0167186	0.113104	0.806054	0.951459	Atg9a
ENSMUSG00000026199.17	1181.95	-0.00140706	0.0958548	0.981693	0.996367	Ankzf1
ENSMUSG00000026200.13	282.142	-0.150755	0.136442	0.0721432	0.315768	Glb1l
ENSMUSG00000026201.12	489.457	-0.226881	0.131832	0.0123819	0.0959432	Stk16
ENSMUSG00000026202.13	2372.07	-0.0112224	0.105607	0.863767	0.968766	Tuba4a
ENSMUSG00000096094.2	10.4196	-0.119995	0.295637	0.246286	0.625051	A630095N17Rik
ENSMUSG00000026203.16	193.383	-0.0655611	0.115961	0.350981	0.72699	Dnajb2
ENSMUSG00000026204.15	18.3822	1.51463	0.536984	7.22248e-05	0.00152996	Ptprn
ENSMUSG00000026209.15	2016.74	0.0338147	0.102556	0.598761	0.881887	Dnpep
ENSMUSG00000026208.9	175.289	1.25296	0.190745	4.98006e-12	4.67683e-10	Des
ENSMUSG00000085653.7	1.29928	0.108305	0.479552	0.196873	NA	Gm15179
ENSMUSG00000026207.16	137.205	1.62928	0.230962	1.20457e-13	1.44329e-11	Speg
ENSMUSG00000033021.16	846.729	0.0593688	0.0982506	0.341099	0.719179	Gmppa
ENSMUSG00000033007.15	4.34663	-1.65463e-05	0.275531	0.999851	0.999951	Asic4
ENSMUSG00000032997.16	473.266	-0.0634401	0.116917	0.368546	0.740348	Chpf
ENSMUSG00000026211.17	505.278	0.199719	0.122481	0.0186344	0.129536	Obsl1
ENSMUSG00000051703.14	14.5036	-0.0979642	0.254432	0.30659	0.68833	Tmem198
ENSMUSG00000032968.4	10.5678	-0.0529064	0.237364	0.549389	0.861952	Inha
ENSMUSG00000026213.15	674.019	-0.00883553	0.0892885	0.879201	0.972557	Stk11ip
ENSMUSG00000006576.16	220.949	1.18967	0.156863	3.75831e-15	5.60819e-13	Slc4a3
ENSMUSG00000026235.14	9086.8	-0.62211	0.163836	2.55551e-06	8.29875e-05	Epha4
ENSMUSG00000099141.1	13.6095	-0.0850927	0.295538	0.383425	0.753373	Mir6352
ENSMUSG00000101849.1	13.0885	-0.0453225	0.227767	0.600988	0.882657	Gm28386
ENSMUSG00000004872.15	19.4761	0.643946	0.546706	0.00651574	0.0601324	Pax3
ENSMUSG00000032908.9	51.326	0.0141308	0.140692	0.849623	0.964813	Sgpp2
ENSMUSG00000026245.16	4088.95	-0.0574619	0.111851	0.401248	0.76714	Farsb
ENSMUSG00000101798.1	3.56033	0.183995	0.464469	0.135594	0.459209	Gm28995
ENSMUSG00000104018.1	17.9482	0.0266986	0.234968	0.756588	0.939447	RP24-300L5.1
ENSMUSG00000090486.2	18.5324	0.0844594	0.235163	0.357567	0.732992	BC035947
ENSMUSG00000099364.1	4.09167	0.033829	0.301883	0.710501	0.925085	5730419F03Rik
ENSMUSG00000032883.15	3386.17	-0.00614039	0.113118	0.928075	0.984433	Acsl3
ENSMUSG00000079470.8	2196.16	0.0937968	0.0984406	0.141644	0.472074	Utp14b
ENSMUSG00000099377.1	1.163	-0.0250099	0.37846	0.76631	NA	Gm6159
ENSMUSG00000054702.14	41.5854	0.303007	0.366805	0.0381111	0.209061	Ap1s3
ENSMUSG00000073643.11	2002.17	-0.104251	0.10727	0.13	0.448193	Wdfy1
ENSMUSG00000026248.9	1106.43	-0.0199848	0.113406	0.769597	0.942937	Mrpl44
ENSMUSG00000026249.10	310.803	1.37789	0.172189	1.01287e-16	1.85233e-14	Serpine2
ENSMUSG00000067106.6	1.28985	0.0542108	0.383716	0.542399	NA	Gm5529
ENSMUSG00000099552.1	5.55079	-0.0886075	0.337184	0.376012	0.747567	9830004L10Rik
ENSMUSG00000043230.2	27.1771	0.32078	0.350935	0.029372	0.176697	Fam124b
ENSMUSG00000103404.1	2.85937	-0.0590477	0.333547	0.532026	0.852302	RP24-193D9.2
ENSMUSG00000004364.14	4798.15	-0.0323539	0.0781804	0.528152	0.849901	Cul3
ENSMUSG00000103076.1	58.2939	-0.174667	0.215476	0.0882224	0.35637	RP24-193D9.4
ENSMUSG00000103525.1	19.4282	0.00242638	0.198519	0.976231	0.9948	RP24-193D9.3
ENSMUSG00000101722.1	1.59253	0.19178	0.534067	0.0992883	NA	Gm29125
ENSMUSG00000038608.15	19.7048	0.725967	0.546435	0.00407626	0.0421543	Dock10
ENSMUSG00000055980.2	74.2225	0.668761	0.284704	0.000367637	0.00607062	Irs1
ENSMUSG00000026142.15	951.469	-0.207949	0.123435	0.0157051	0.115336	Rhbdd1
ENSMUSG00000104493.1	15.7961	-0.0404034	0.220734	0.636527	0.897784	RP23-430H22.1
ENSMUSG00000100786.1	24.6196	0.593484	0.527047	0.00810345	0.0708229	Gm28940
ENSMUSG00000096779.1	3.09267	0.0115431	0.28857	0.897266	0.97757	Gm22112
ENSMUSG00000067158.9	11.9549	-0.0243295	0.234371	0.777135	0.944414	Col4a4
ENSMUSG00000079465.8	2.29151	0.00270069	0.361605	0.974833	0.994459	Col4a3
ENSMUSG00000097564.2	6.80577	-0.128335	0.362048	0.24031	0.618329	C430014B12Rik
ENSMUSG00000026150.14	2425.01	-0.134732	0.108664	0.0630015	0.290541	Mff
ENSMUSG00000101450.1	39.5353	-0.204254	0.259791	0.0723662	0.316407	Gm28941
ENSMUSG00000026149.2	12.656	-0.0479562	0.243521	0.588063	0.878818	Tm4sf20
ENSMUSG00000100170.1	2.57681	0.0652215	0.358131	0.490675	0.828849	Gm28942
ENSMUSG00000100744.1	1.53552	-0.147667	0.505509	0.136833	NA	Gm17764
ENSMUSG00000026159.13	4806.05	0.0130198	0.0748998	0.794525	0.948614	Agfg1
ENSMUSG00000113880.1	3.81108	0.218157	0.543972	0.086647	0.352604	NA
ENSMUSG00000038496.16	107.054	0.0571052	0.134656	0.448194	0.802506	Slc19a3
ENSMUSG00000100432.1	1.203	0.018988	0.381834	0.818312	NA	Gm7539
ENSMUSG00000026163.17	3.26562	0.823006	1.08591	0.00187228	0.0229881	Sphkap
ENSMUSG00000100580.6	6.52131	0.234488	0.444609	0.0897226	0.360109	4933436I20Rik
ENSMUSG00000045658.16	402.032	-0.126326	0.120725	0.0977049	0.379386	Pid1
ENSMUSG00000102750.1	5.18194	-0.00980029	0.315238	0.912892	0.980607	RP23-81L22.3
ENSMUSG00000101934.1	1.78717	0.0515095	0.398022	0.545874	NA	Gm18304
ENSMUSG00000036766.12	40.7005	-0.0916541	0.194858	0.29726	0.678133	Dner
ENSMUSG00000026219.14	26725.2	0.0472709	0.0891429	0.410591	0.775252	Trip12
ENSMUSG00000103505.1	31.3229	0.00885606	0.202157	0.913915	0.980618	RP23-447L15.2
ENSMUSG00000104503.1	75.6585	-0.0440584	0.209278	0.60207	0.882907	RP23-447L15.3
ENSMUSG00000073633.9	69.9752	-0.0237216	0.13625	0.748596	0.936522	Fbxo36
ENSMUSG00000026220.6	54.1532	1.38905	0.316488	6.65211e-07	2.44041e-05	Slc16a14
ENSMUSG00000099693.1	1.99028	0.143474	0.471033	0.177056	0.533227	Gm29284
ENSMUSG00000052477.15	4.07557	0.680811	0.918714	0.00626947	0.0584934	C130026I21Rik
ENSMUSG00000064281.7	5.30638	-0.243705	0.530367	0.0805519	0.338333	Rpl19-ps1
ENSMUSG00000089844.7	4.7715	-0.0760295	0.307926	0.432715	0.792815	A530032D15Rik
ENSMUSG00000072109.11	29.623	3.38601	0.513518	1.65687e-13	1.92823e-11	A530040E14Rik
ENSMUSG00000089716.7	11.8161	0.898876	0.74894	0.00352813	0.0377872	Gm6264
ENSMUSG00000079455.9	21.3863	3.16868	0.539566	2.2831e-11	1.96226e-09	Gm16026
ENSMUSG00000070034.13	31.281	2.59925	0.396633	1.15069e-12	1.19099e-10	Sp110
ENSMUSG00000070031.11	20.332	1.73667	0.497407	1.09198e-05	0.000300796	Sp140
ENSMUSG00000073628.5	1.76671	0.0760686	0.406172	0.404753	NA	Gm10552
ENSMUSG00000026222.16	29.6302	-0.0375717	0.177525	0.64008	0.899144	Sp100
ENSMUSG00000052760.16	43.5498	0.0613888	0.160329	0.443452	0.799561	A630001G21Rik
ENSMUSG00000036707.16	3611.74	9.51097e-05	0.103464	0.998825	0.999607	Cab39
ENSMUSG00000026223.15	905.371	0.184812	0.184053	0.0606787	0.283716	Itm2c
ENSMUSG00000049608.8	2.54602	0.52706	0.888405	0.00676622	0.0616385	Gpr55
ENSMUSG00000099342.1	58.17	-0.120859	0.193215	0.186761	0.547235	Gm18180
ENSMUSG00000026226.16	2.09476	0.000152314	0.319678	0.998639	0.999607	Spata3
ENSMUSG00000026227.11	7.96968	0.0225676	0.237922	0.793536	0.948346	2810459M11Rik
ENSMUSG00000026229.17	6738.92	-0.0160171	0.0727222	0.741423	0.935403	Psmd1
ENSMUSG00000077274.1	4.4367	-0.0432634	0.29544	0.637787	0.898229	Gm22786
ENSMUSG00000026228.6	38.9486	0.0116157	0.191007	0.885554	0.974101	Htr2b
ENSMUSG00000103272.1	37.3382	-0.048436	0.192844	0.559364	0.86576	RP24-308M3.2
ENSMUSG00000062590.13	580.875	-0.0358119	0.0867828	0.525015	0.848369	Armc9
ENSMUSG00000079445.3	227.068	-1.01523	0.16391	8.25736e-11	6.60671e-09	B3gnt7
ENSMUSG00000026234.12	8794.65	0.00610462	0.197312	0.940166	0.98697	Ncl
ENSMUSG00000104627.1	1.26277	-0.018481	0.377394	0.825021	NA	NA
ENSMUSG00000064823.1	6.60615	0.0261753	0.264315	0.767985	0.942673	Snord82
ENSMUSG00000073627.7	152.65	-0.0610561	0.122306	0.398002	0.764675	C130036L24Rik
ENSMUSG00000036574.5	2.70235	-0.0369919	0.346812	0.682088	0.915542	1700019O17Rik
ENSMUSG00000026238.14	24686.9	-0.112877	0.155148	0.180974	0.539175	Ptma
ENSMUSG00000026239.14	221.14	-0.179652	0.192591	0.0706815	0.311842	Pde6d
ENSMUSG00000102927.1	18.1707	0.0888299	0.300751	0.367579	0.739698	RP23-11K8.3
ENSMUSG00000026240.12	661.307	-0.227565	0.156197	0.0196814	0.134848	Cops7b
ENSMUSG00000103609.1	2.51871	0.0920572	0.399707	0.346395	0.723477	RP23-11K8.4
ENSMUSG00000026241.5	5.2254	0.787274	1.00881	0.00347629	0.0373636	Nppc
ENSMUSG00000053333.15	862.762	-0.0227464	0.0829618	0.676445	0.912567	Dis3l2
ENSMUSG00000100225.1	6.37743	-0.34712	0.555646	0.0420417	0.224019	Gm29097
ENSMUSG00000100768.1	10.423	-0.0281214	0.239472	0.74557	0.936522	Gm29055
ENSMUSG00000104121.1	5.75988	0.121937	0.368784	0.258362	0.638106	RP23-26I10.1
ENSMUSG00000102383.1	6.97812	0.00631266	0.256897	0.942446	0.987389	RP23-26I10.2
ENSMUSG00000104400.1	10.0741	-0.05309	0.258778	0.557391	0.865048	RP23-26I10.3
ENSMUSG00000102293.1	2.38152	-0.0162049	0.347291	0.853952	0.965808	RP23-26I10.4
ENSMUSG00000102649.1	5.66935	0.00574717	0.25606	0.947549	0.988288	RP23-26I10.5
ENSMUSG00000084106.4	84.5946	-0.0406895	0.15513	0.600926	0.882657	Gm6136
ENSMUSG00000102571.1	2.22845	0.0276945	0.362317	0.751136	0.93759	RP23-26I10.6
ENSMUSG00000099401.1	4.43811	-0.0239682	0.291617	0.79021	0.947518	Gm28375
ENSMUSG00000103984.1	13.4757	-0.0501428	0.243652	0.572098	0.872214	RP24-286D13.3
ENSMUSG00000026246.12	19.189	1.83292	0.586979	2.44071e-05	0.000613279	Alppl2
ENSMUSG00000036500.4	3.651	0.495328	0.818591	0.0123128	0.0955289	Akp3
ENSMUSG00000026247.13	55.7134	1.59613	0.28227	1.0254e-09	6.96149e-08	Ecel1
ENSMUSG00000036480.9	18.9267	0.0415353	0.201771	0.618634	0.889346	Prss56
ENSMUSG00000026251.13	14.6982	0.0464227	0.217253	0.587568	0.878735	Chrnd
ENSMUSG00000026253.14	12.7829	-0.054297	0.250903	0.545758	0.86008	Chrng
ENSMUSG00000026254.17	3429.11	-0.208322	0.13415	0.0199041	0.135915	Eif4e2
ENSMUSG00000026255.15	34.1593	-0.0290098	0.176602	0.715949	0.926729	Efhd1
ENSMUSG00000048000.15	3832.91	-0.0872067	0.10872	0.201873	0.570338	Gigyf2
ENSMUSG00000095281.1	7.83287	0.0832679	0.294065	0.391812	0.760384	Gm22549
ENSMUSG00000079436.3	32.0879	-0.0301461	0.174883	0.70485	0.923089	Kcnj13
ENSMUSG00000089613.1	6.84312	-0.105934	0.304862	0.298063	0.678732	Gm23504
ENSMUSG00000026259.14	16.9908	1.17908	0.67171	0.0008685	0.0123607	Ngef
ENSMUSG00000026288.14	5527.97	-0.117074	0.0976127	0.0743786	0.321391	Inpp5d
ENSMUSG00000026289.15	2154.66	0.0302336	0.0840606	0.582026	0.87639	Atg16l1
ENSMUSG00000087968.1	184.419	-0.504936	0.355287	0.00502296	0.0497449	Gm25395
ENSMUSG00000089281.1	208.222	-0.517126	0.324773	0.00320507	0.0351474	Scarna6
ENSMUSG00000056055.13	21.2086	0.0422104	0.190161	0.607391	0.88531	Sag
ENSMUSG00000070738.10	2834.01	0.245864	0.130811	0.00768759	0.0680937	Dgkd
ENSMUSG00000101942.1	4.63699	0.183988	0.469722	0.134389	0.456975	Gm19582
ENSMUSG00000103996.1	4.13872	0.0862452	0.327216	0.385674	0.755659	RP23-473M13.2
ENSMUSG00000103591.1	14.154	0.020881	0.255218	0.811884	0.953162	RP24-398O5.2
ENSMUSG00000005501.14	1041.8	0.00441157	0.0864858	0.937994	0.986663	Usp40
ENSMUSG00000081984.3	23.2622	0.221448	0.35475	0.0853901	0.349847	Dnajb3
ENSMUSG00000079429.9	185.703	0.0754111	0.146931	0.340748	0.718976	Mroh2a
ENSMUSG00000044783.16	5217.41	-0.158086	0.108364	0.0352152	0.198152	Hjurp
ENSMUSG00000099553.1	4.19377	0.0559906	0.312924	0.551382	0.862368	Gm29538
ENSMUSG00000100908.1	8.90602	0.0340344	0.242503	0.696739	0.920121	Gm28888
ENSMUSG00000049866.12	135.327	1.01947	0.21249	1.4123e-07	6.10148e-06	Arl4c
ENSMUSG00000097398.2	18.4996	2.23061	0.516565	3.50906e-07	1.36561e-05	2410088K16Rik
ENSMUSG00000099378.1	1.67353	0.00539884	0.34344	0.951035	NA	1700067G17Rik
ENSMUSG00000036206.12	1806.96	0.136682	0.103234	0.0522424	0.258803	Sh3bp4
ENSMUSG00000102700.1	80.7986	-0.81355	0.303121	0.000152445	0.00286991	RP24-396E16.1
ENSMUSG00000055013.16	1355.7	0.0309092	0.122042	0.663436	0.908125	Agap1
ENSMUSG00000104114.1	6.87924	0.00649704	0.290009	0.942017	0.987389	RP23-102K8.1
ENSMUSG00000101662.1	2.17276	0.00467637	0.339177	0.957754	0.990663	Gm28499
ENSMUSG00000102009.6	17.9682	0.0306664	0.212606	0.714859	0.926455	4933400F21Rik
ENSMUSG00000088775.1	1.22961	0.00236328	0.367516	0.977718	NA	Gm26037
ENSMUSG00000103252.1	6.29514	0.0125978	0.269446	0.886777	0.974433	RP24-78E16.3
ENSMUSG00000034486.8	21.7116	-0.226234	0.315617	0.0705824	0.311631	Gbx2
ENSMUSG00000092627.2	16.2261	-0.171172	0.316699	0.136474	0.460778	D130058E05Rik
ENSMUSG00000067081.13	3.2065	0.0303833	0.325019	0.737675	0.933737	Asb18
ENSMUSG00000026301.16	10.6723	0.528782	0.585032	0.0145294	0.108838	Iqca
ENSMUSG00000044337.5	91.626	-0.0584602	0.136492	0.440457	0.79812	Ackr3
ENSMUSG00000101028.1	3.21951	-0.0105763	0.338307	0.904905	0.978881	Gm28723
ENSMUSG00000103292.1	25.3732	-1.17509	0.460946	0.000182662	0.00332935	RP24-393L8.1
ENSMUSG00000034432.11	1637.21	-0.0177148	0.0947151	0.770561	0.942937	Cops8
ENSMUSG00000048126.16	4.9875	0.553356	0.804897	0.0124978	0.0965338	Col6a3
ENSMUSG00000026303.6	22.3947	1.40158	0.546385	0.000140759	0.00267684	Mlph
ENSMUSG00000026304.13	53.8743	0.102251	0.196739	0.253483	0.633395	Rab17
ENSMUSG00000026305.15	597.26	1.21196	0.151246	1.20076e-16	2.16342e-14	Lrrfip1
ENSMUSG00000070732.2	236.446	1.03623	0.1711	1.86775e-10	1.42411e-08	Rbm44
ENSMUSG00000034343.14	651.12	-0.0870823	0.100959	0.177989	0.534868	Ube2f
ENSMUSG00000083064.1	22.1127	0.0471345	0.188702	0.567201	0.869678	Gm7785
ENSMUSG00000026307.12	523.004	-0.0201174	0.109416	0.76352	0.941331	Scly
ENSMUSG00000090322.1	5.45497	-0.0342701	0.275417	0.703497	0.922613	Gm17090
ENSMUSG00000049515.12	16.9327	0.573121	0.535014	0.00950169	0.0796984	Espnl
ENSMUSG00000026308.8	2.16698	0.2108	0.568647	0.0732695	0.31858	Klhl30
ENSMUSG00000047443.14	59.6882	0.180483	0.245238	0.093928	0.370097	Fam132b
ENSMUSG00000026309.14	1118.61	-0.260767	0.131474	0.00543345	0.0527156	Ilkap
ENSMUSG00000067071.8	312.834	0.0593819	0.136242	0.433313	0.793515	Hes6
ENSMUSG00000055866.9	5.7022	0.174609	0.398665	0.150741	0.487692	Per2
ENSMUSG00000034292.13	421.021	0.0207032	0.11362	0.761828	0.941206	Traf3ip1
ENSMUSG00000026311.16	568.627	-0.152194	0.121812	0.0551726	0.267735	Asb1
ENSMUSG00000101705.1	1.82282	0.0993492	0.436542	0.288941	NA	Gm28380
ENSMUSG00000102745.1	3.76952	-0.0436347	0.303257	0.635971	0.897694	RP23-309A8.1
ENSMUSG00000026313.16	1244.81	-0.047366	0.118324	0.501277	0.834979	Hdac4
ENSMUSG00000103101.1	57.4531	-0.0411286	0.177788	0.610003	0.885815	RP23-309A8.4
ENSMUSG00000102565.1	20.8499	-0.00901566	0.19492	0.911482	0.980228	RP23-309A8.3
ENSMUSG00000026260.12	3524.59	-0.0437001	0.114134	0.526063	0.848943	Ndufa10
ENSMUSG00000061616.5	1.90781	-0.138435	0.488599	0.163012	NA	Olfr12
ENSMUSG00000073616.10	777.73	0.0130528	0.128151	0.856401	0.96665	Myeov2
ENSMUSG00000044055.5	3.30729	0.0141146	0.321756	0.87482	0.971795	Otos
ENSMUSG00000100781.1	2.85389	0.0188496	0.332042	0.833036	0.959719	Gm29481
ENSMUSG00000034220.7	546.941	0.11812	0.108032	0.0935864	0.369191	Gpc1
ENSMUSG00000101995.1	9.77097	0.0233631	0.261796	0.791516	0.947536	Gm29480
ENSMUSG00000034212.14	47.625	-0.00874344	0.159424	0.909595	0.979898	Ankmy1
ENSMUSG00000047067.7	133.258	0.0888127	0.137948	0.256945	0.636987	Dusp28
ENSMUSG00000097251.2	24.3021	0.0195465	0.172807	0.80423	0.950962	5033417F24Rik
ENSMUSG00000026269.14	525.427	-0.0163425	0.131761	0.822752	0.956464	Rnpepl1
ENSMUSG00000100632.1	21.1501	-0.025466	0.188995	0.753123	0.938289	9430060I03Rik
ENSMUSG00000026270.11	728.405	-0.0307376	0.115541	0.656426	0.905272	Capn10
ENSMUSG00000026271.15	15.1927	0.269134	0.433084	0.0650897	0.296364	Gpr35
ENSMUSG00000014602.15	616.714	1.07607	0.178758	2.21511e-10	1.67844e-08	Kif1a
ENSMUSG00000034159.12	2.99838	0.0222195	0.337688	0.803544	0.950747	2310007B03Rik
ENSMUSG00000084989.3	39.2757	0.214905	0.266917	0.0649998	0.296364	E030010N08Rik
ENSMUSG00000047793.13	252.98	0.386721	0.252236	0.0055478	0.0535685	Sned1
ENSMUSG00000026273.13	775.323	-0.0262266	0.108091	0.693026	0.91889	Mterf4
ENSMUSG00000101172.1	5.80821	0.0321526	0.255949	0.716178	0.92682	Gm28535
ENSMUSG00000100351.1	7.39029	0.036461	0.250787	0.67961	0.91438	Gm7867
ENSMUSG00000026274.11	1823.85	-0.00419075	0.0681873	0.927359	0.984234	Pask
ENSMUSG00000026275.13	1782.53	-0.0285294	0.121164	0.686659	0.917129	Ppp1r7
ENSMUSG00000098689.1	2.60349	0.00477997	0.330096	0.957124	0.990629	Mir6345
ENSMUSG00000064389.1	1.91828	0.0454318	0.342158	0.621057	NA	Gm26446
ENSMUSG00000034107.10	13.7303	0.142876	0.28914	0.181274	0.539476	Ano7
ENSMUSG00000034088.15	9224.47	0.0382548	0.119918	0.58811	0.878818	Hdlbp
ENSMUSG00000090489.3	34.5625	0.0744308	0.183214	0.377928	0.748838	Gm17415
ENSMUSG00000026276.20	203.008	-0.126069	0.174551	0.158367	0.501316	2023-09-02
ENSMUSG00000034066.13	130.88	0.00987003	0.143814	0.895217	0.976856	Farp2
ENSMUSG00000103854.1	2.26982	-0.145836	0.47764	0.16889	0.519004	RP23-302H1.1
ENSMUSG00000026277.14	2239.22	-0.066826	0.110734	0.327893	0.706282	Stk25
ENSMUSG00000100927.1	3.06921	-0.113056	0.375443	0.284373	0.665088	Gm28536
ENSMUSG00000026278.14	159.895	0.137372	0.169105	0.126109	0.44073	Bok
ENSMUSG00000026279.14	394.199	-0.360287	0.156564	0.00103754	0.0142657	Thap4
ENSMUSG00000101952.1	4.67479	-0.104537	0.349133	0.313117	0.693304	Gm10550
ENSMUSG00000026280.17	1173.32	-0.36564	0.130418	0.000249872	0.00434117	Atg4b
ENSMUSG00000026281.15	2206.9	-0.0873659	0.118614	0.227398	0.603742	Dtymk
ENSMUSG00000026283.13	2097.89	-0.0321798	0.086488	0.567363	0.869783	Ing5
ENSMUSG00000088961.1	1.68563	0.0556939	0.410384	0.503537	NA	Gm22089
ENSMUSG00000073609.9	117.726	0.0494552	0.141251	0.516116	0.843138	D2hgdh
ENSMUSG00000093805.7	11.8727	0.173602	0.341473	0.140538	0.47013	Gm9994
ENSMUSG00000099624.1	4.83001	0.0576105	0.303792	0.539813	0.856147	Gm7889
ENSMUSG00000073608.4	2.77274	0.0428756	0.320257	0.642071	0.90034	Gm6086
ENSMUSG00000100347.1	5.90663	0.1339	0.347827	0.223419	0.598286	Gm7895
ENSMUSG00000051185.9	170.061	-0.10121	0.15692	0.225359	0.601096	Fam174a
ENSMUSG00000103973.1	11.8716	-0.0845141	0.25487	0.368313	0.740312	RP23-192P10.3
ENSMUSG00000081051.4	35.2129	-0.067483	0.202573	0.432532	0.792672	Gm15427
ENSMUSG00000040710.10	12.1932	0.129405	0.293468	0.217537	0.591133	St8sia4
ENSMUSG00000040693.7	735.684	-0.271109	0.177314	0.0117247	0.0922312	Slco4c1
ENSMUSG00000097814.5	468.412	-0.695666	0.138039	1.48263e-08	8.21457e-07	Panct2
ENSMUSG00000100454.1	1.71509	-0.0123359	0.379875	0.881143	NA	Gm28901
ENSMUSG00000044757.7	3.9732	-0.119175	0.37146	0.266295	0.646459	Gm6430
ENSMUSG00000044768.16	115.929	0.0263625	0.124008	0.712057	0.925569	D1Ertd622e
ENSMUSG00000040648.14	3300.54	0.0193684	0.0846817	0.727364	0.930158	Ppip5k2
ENSMUSG00000026333.14	279.007	-0.287616	0.163953	0.00660835	0.0607463	Gin1
ENSMUSG00000026335.16	405.006	0.781842	0.16087	6.12904e-08	2.88349e-06	Pam
ENSMUSG00000104140.1	2.9534	0.0243316	0.331012	0.786663	0.94702	RP24-244I20.2
ENSMUSG00000089782.1	30.3706	0.0220549	0.180103	0.782239	0.94624	Gm3531
ENSMUSG00000089706.7	6.64644	0.0300683	0.266458	0.735843	0.932806	B230216N24Rik
ENSMUSG00000089791.1	18.678	-0.0131533	0.187921	0.870025	0.970757	Gm3555
ENSMUSG00000100009.6	6.81487	0.172917	0.379559	0.150701	0.487692	Gm7967
ENSMUSG00000099453.1	1.26271	-0.00131189	0.38231	0.987154	NA	Gm18248
ENSMUSG00000082431.3	18.0879	-0.00831008	0.194094	0.918277	0.982021	Tdpx-ps1
ENSMUSG00000099835.1	1.84348	0.0212896	0.366686	0.804257	NA	Gm29668
ENSMUSG00000050840.8	1.68554	0.00251707	0.336408	0.977301	NA	Cdh20
ENSMUSG00000047496.6	34.252	0.0558918	0.223496	0.521365	0.845749	Rnf152
ENSMUSG00000067017.5	1119.34	-0.113425	0.126201	0.14072	0.470674	Gm3608
ENSMUSG00000056536.14	1548.87	-0.112491	0.107036	0.105388	0.397336	Pign
ENSMUSG00000100672.1	2.44272	-0.00668949	0.338894	0.939644	0.986898	Gm28404
ENSMUSG00000101219.1	2.29137	-0.197412	0.526158	0.102532	0.390345	Gm20302
ENSMUSG00000101656.1	4.74388	0.0864323	0.340856	0.385894	0.755846	Gm8004
ENSMUSG00000026319.13	1828.42	0.00203716	0.0708231	0.965905	0.992606	2310035C23Rik
ENSMUSG00000104044.1	50.9528	-0.0472983	0.216172	0.580334	0.875163	RP24-283P23.1
ENSMUSG00000026321.7	42.498	1.61593	0.372252	6.76849e-07	2.47564e-05	Tnfrsf11a
ENSMUSG00000099843.1	23.7696	-0.205831	0.322565	0.0920176	0.365471	Gm7160
ENSMUSG00000038866.15	647.852	-0.103744	0.140808	0.196568	0.562424	Zcchc2
ENSMUSG00000102501.1	1.5045	0.0386863	0.382495	0.651511	NA	RP24-339K18.3
ENSMUSG00000044340.7	856.932	-0.0576435	0.125337	0.429569	0.790763	Phlpp1
ENSMUSG00000103291.1	20.6829	-0.0157814	0.206075	0.848364	0.964491	RP24-92A2.1
ENSMUSG00000057329.7	6.25713	-0.318623	0.513228	0.049508	0.250194	Bcl2
ENSMUSG00000009905.5	1015.33	0.042062	0.10062	0.507233	0.83871	Kdsr
ENSMUSG00000009907.17	2785.73	-0.00971379	0.0715193	0.839556	0.961815	Vps4b
ENSMUSG00000067006.12	3.73509	0.0441058	0.312757	0.633122	0.896462	Serpinb5
ENSMUSG00000026315.13	30.8977	0.113751	0.220089	0.226807	0.60308	Serpinb8
ENSMUSG00000026312.17	2.74343	0.260025	0.600749	0.0562174	0.270714	Cdh7
ENSMUSG00000100290.1	1.44509	-0.0683429	0.425845	0.411242	NA	Gm18552
ENSMUSG00000102728.1	1.70516	0.00245862	0.353357	0.977396	NA	RP23-4E15.1
ENSMUSG00000038702.6	661.679	-0.00702213	0.0893947	0.903964	0.978574	Dsel
ENSMUSG00000097648.1	94.4967	0.051487	0.141652	0.500167	0.834979	9330185C12Rik
ENSMUSG00000102030.1	17.1392	0.133012	0.273158	0.19847	0.565201	Gm29106
ENSMUSG00000099870.1	1.41987	0.171404	0.54288	0.0901398	NA	Gm7200
ENSMUSG00000026374.14	3396.25	-0.00451864	0.0882696	0.937511	0.986663	Tsn
ENSMUSG00000026377.12	2234.22	-0.0468877	0.113195	0.494749	0.831809	Nifk
ENSMUSG00000064302.13	2261.66	0.0927303	0.115635	0.195117	0.560575	Clasp1
ENSMUSG00000077257.1	1.13751	0.0293024	0.369369	0.734669	NA	Gm26080
ENSMUSG00000107722.1	6.99701	-0.0413292	0.24086	0.637477	0.89808	NA
ENSMUSG00000100770.1	4.43757	0.0248302	0.334076	0.782114	0.94624	Gm28466
ENSMUSG00000026380.10	44435.2	-0.142293	0.127215	0.0757474	0.325571	Tfcp2l1
ENSMUSG00000089601.1	19.8861	-0.0447679	0.206683	0.595194	0.880805	Gm22094
ENSMUSG00000101624.1	27.4548	-0.0822891	0.241256	0.372079	0.743682	Gm28882
ENSMUSG00000048402.14	850.601	-0.00237342	0.190229	0.976475	0.9948	Gli2
ENSMUSG00000098273.1	2.9121	-0.0674657	0.388046	0.462661	0.811679	Mir6346
ENSMUSG00000097408.1	3.05137	0.00117558	0.308433	0.989522	0.997147	Gm26831
ENSMUSG00000099860.1	5.02183	-0.0712775	0.301281	0.457031	0.807524	Gm29456
ENSMUSG00000037035.5	24.4903	0.12627	0.244793	0.202361	0.570814	Inhbb
ENSMUSG00000004451.14	2078.18	-0.0502015	0.116599	0.473017	0.818875	Ralb
ENSMUSG00000101437.1	5.16439	-0.0543485	0.293329	0.559334	0.86576	Gm29454
ENSMUSG00000098447.2	3.18019	-0.0551316	0.341967	0.555614	0.863972	Gm27184
ENSMUSG00000098923.1	388.687	-0.292308	0.150833	0.0043826	0.0447139	Tmem185b
ENSMUSG00000101731.1	32.6775	0.0197876	0.173494	0.802082	0.950223	3830432H09Rik
ENSMUSG00000026383.14	1190.35	0.0448259	0.107254	0.499249	0.834644	Epb4.1l5
ENSMUSG00000102687.1	8.14703	-0.176334	0.398792	0.148189	0.483552	RP23-386K20.6
ENSMUSG00000026384.13	2246.53	-0.00390938	0.0897961	0.946641	0.988204	Ptpn4
ENSMUSG00000091876.1	7.80085	0.0165599	0.234424	0.846672	0.963807	Gm3851
ENSMUSG00000103146.1	43.431	0.0411361	0.203538	0.622729	0.890874	RP23-274C16.4
ENSMUSG00000090277.1	3.09908	0.0866746	0.373646	0.380136	0.750981	Gm8338
ENSMUSG00000101224.1	2.20198	-0.0414512	0.364631	0.641952	0.90034	Gm28209
ENSMUSG00000036975.5	490.588	0.0996977	0.12386	0.184267	0.544121	Tmem177
ENSMUSG00000036962.12	1.57977	0.0752584	0.39793	0.41629	NA	Cfap221
ENSMUSG00000050777.7	63.714	-0.012434	0.140194	0.867299	0.970028	Tmem37
ENSMUSG00000026385.16	2801.33	0.143821	0.176144	0.117413	0.422775	Dbi
ENSMUSG00000026388.15	55.2554	-0.0467165	0.150848	0.547036	0.860404	3110009E18Rik
ENSMUSG00000026389.16	206.784	1.479	0.224097	3.07448e-12	2.95575e-10	Steap3
ENSMUSG00000058665.8	8.05835	0.127109	0.347621	0.241445	0.61996	En1
ENSMUSG00000097881.7	16.7356	0.00188413	0.19452	0.981437	0.996264	Celrr
ENSMUSG00000104332.1	2.22944	0.0184207	0.369637	0.828633	0.95875	RP24-98O21.3
ENSMUSG00000003721.14	571.864	0.111602	0.134132	0.159209	0.502735	Insig2
ENSMUSG00000104253.1	38.8507	0.00550685	0.159225	0.942938	0.987389	RP24-98O21.4
ENSMUSG00000026339.18	1712.75	-0.146275	0.110999	0.0502621	0.252536	Ccdc93
ENSMUSG00000085857.1	10.4259	-0.142285	0.330604	0.198286	0.565007	Gm15392
ENSMUSG00000083582.1	1.31887	0.201817	0.584907	0.0564854	NA	Gm15393
ENSMUSG00000050534.8	5.88969	0.385918	0.625048	0.0331073	0.190326	Htr5b
ENSMUSG00000001674.11	4173.88	0.0337546	0.0852545	0.543189	0.858478	Ddx18
ENSMUSG00000026341.16	8178.15	0.00377859	0.0972045	0.951345	0.989499	Actr3
ENSMUSG00000026342.10	310.714	-0.298161	0.167824	0.00576601	0.05515	Slc35f5
ENSMUSG00000026343.6	1.47505	0.137752	0.507298	0.13461	NA	Gpr39
ENSMUSG00000026344.9	4.02255	0.106098	0.36526	0.307752	0.689303	Lypd1
ENSMUSG00000049690.15	16.7017	0.0988956	0.255872	0.303489	0.685465	Nckap5
ENSMUSG00000036155.13	548.579	-0.156999	0.164786	0.0856064	0.350245	Mgat5
ENSMUSG00000104039.1	3.02123	0.0404111	0.332983	0.659142	0.906202	RP23-323H18.1
ENSMUSG00000104378.1	17.8541	0.101195	0.261435	0.297071	0.677768	RP23-323H18.2
ENSMUSG00000099471.1	6.47211	-0.00228521	0.250064	0.979004	0.995498	Gm8451
ENSMUSG00000065687.1	2.02233	0.0314904	0.341938	0.726319	0.930031	Gm23734
ENSMUSG00000103390.1	1.3876	-0.00674477	0.386072	0.933358	NA	RP23-56C10.3
ENSMUSG00000026347.13	7.85664	-1.55645	0.83347	0.000361115	0.00597916	Tmem163
ENSMUSG00000026348.7	15.2181	-0.0280912	0.211331	0.737014	0.933359	Acmsd
ENSMUSG00000026349.14	4038.17	-0.138493	0.108009	0.0565268	0.271807	Ccnt2
ENSMUSG00000051590.10	2.70912	-0.0599654	0.379807	0.510299	0.840181	Map3k19
ENSMUSG00000036104.12	2367.78	-0.0733035	0.111218	0.286298	0.666951	Rab3gap1
ENSMUSG00000036086.16	1839.08	-0.182905	0.109375	0.0196093	0.134543	Zranb3
ENSMUSG00000099760.1	10.3245	-0.248526	0.4094	0.074737	0.322539	Gm28800
ENSMUSG00000104164.1	156.273	-0.131161	0.217608	0.173385	0.527042	RP24-338G10.1
ENSMUSG00000058603.10	18.4634	-0.00457304	0.191018	0.95475	0.990137	Rpl28-ps1
ENSMUSG00000102782.1	32.19	0.0370077	0.31452	0.686136	0.916826	RP23-264E23.2
ENSMUSG00000103999.1	16.9875	-0.101914	0.298917	0.311268	0.692198	RP23-264E23.1
ENSMUSG00000056211.13	1791.69	-0.0135894	0.149706	0.857821	0.96726	R3hdm1
ENSMUSG00000101535.1	8.31741	-0.0190024	0.289843	0.83232	0.95943	Gm29383
ENSMUSG00000104239.1	14.344	-0.00957929	0.244146	0.911713	0.980253	RP23-114N13.2
ENSMUSG00000102179.1	9.27013	0.110507	0.30061	0.279894	0.660189	RP23-114N13.3
ENSMUSG00000103497.1	27.1068	-0.0158081	0.172346	0.840759	0.962068	RP23-114N13.4
ENSMUSG00000065520.2	1.28756	0.0274275	0.36996	0.750051	NA	Mir128-1
ENSMUSG00000026353.9	2022.2	-0.0151479	0.104422	0.815612	0.953994	Ubxn4
ENSMUSG00000026354.8	27.8611	1.15541	0.476688	0.000243674	0.00426701	Lct
ENSMUSG00000026355.11	12686.7	-0.0779162	0.104777	0.238244	0.615879	Mcm6
ENSMUSG00000026356.15	6705.96	-0.0671844	0.124735	0.359297	0.734448	Dars
ENSMUSG00000100078.1	15.942	-0.0635296	0.223064	0.469872	0.816743	Gm6170
ENSMUSG00000045382.6	39.7952	-0.00088292	0.159816	0.990849	0.997515	Cxcr4
ENSMUSG00000042581.14	1.91192	0.0100786	0.338954	0.909287	NA	Thsd7b
ENSMUSG00000089648.1	2.66974	-0.036582	0.343141	0.686153	0.916826	Gm15790
ENSMUSG00000094122.1	1.60894	-0.0645444	0.390882	0.475911	NA	Rpl31-ps9
ENSMUSG00000026401.15	1.79629	0.128752	0.455844	0.209643	NA	Daf2
ENSMUSG00000087691.1	23.9573	0.0975626	0.245683	0.303404	0.685399	Gm15674
ENSMUSG00000086825.1	39.1859	0.0499409	0.178329	0.539505	0.856009	Gm15675
ENSMUSG00000026399.12	536.639	-0.0216067	0.0877263	0.705485	0.923183	Cd55
ENSMUSG00000085526.1	2.77282	0.239091	0.551729	0.0772271	0.329081	Gm16083
ENSMUSG00000102139.1	1.49835	-0.0745914	0.39174	0.424427	NA	RP24-483O2.1
ENSMUSG00000042554.10	1.1955	0.0513817	0.406956	0.535243	NA	Zp3r
ENSMUSG00000026409.14	510.825	-0.687997	0.133391	7.70765e-09	4.57252e-07	Pfkfb2
ENSMUSG00000046404.5	480.842	-0.0146098	0.0904427	0.803361	0.950747	Yod1
ENSMUSG00000104515.1	10.1644	-0.026385	0.231936	0.758466	0.939935	RP24-87I22.4
ENSMUSG00000042510.7	97.3118	-0.0707057	0.150829	0.373508	0.745024	AA986860
ENSMUSG00000016528.10	860.923	0.0385251	0.0821859	0.471785	0.81779	Mapkapk2
ENSMUSG00000102856.1	23.3507	-0.00174649	0.184551	0.982546	0.996434	RP23-122P5.3
ENSMUSG00000016526.8	1112.41	0.442683	0.132043	1.83608e-05	0.000475094	Dyrk3
ENSMUSG00000026427.16	2442.27	0.0521324	0.0839695	0.336773	0.716063	Eif2d
ENSMUSG00000026430.16	116.226	0.125333	0.175237	0.160915	0.505193	Rassf5
ENSMUSG00000101729.1	1.37954	0.108781	0.479866	0.195856	NA	Gm17796
ENSMUSG00000042349.13	188.211	-0.0231548	0.110474	0.730701	0.931441	Ikbke
ENSMUSG00000102027.1	1.97683	-0.0730936	0.413292	0.40959	0.774388	Gm28914
ENSMUSG00000102055.1	2.64449	0.00829322	0.341211	0.925089	0.983559	Gm28913
ENSMUSG00000026425.15	2099.8	0.0281312	0.120135	0.689565	0.917421	Srgap2
ENSMUSG00000102733.1	13.0514	-0.00804734	0.199278	0.921422	0.982749	RP24-81A5.3
ENSMUSG00000104060.1	14.4691	0.0922141	0.283692	0.345823	0.723162	RP24-81A5.2
ENSMUSG00000101778.1	46.9199	0.0128025	0.182616	0.872493	0.97127	Gm29488
ENSMUSG00000099959.1	2.43694	0.00733855	0.337538	0.933894	0.985923	Gm29487
ENSMUSG00000076287.1	2.50465	-0.104444	0.411761	0.298002	0.678732	Gm24273
ENSMUSG00000055184.4	164.712	-0.0625903	0.123232	0.388603	0.758465	Fam72a
ENSMUSG00000052688.12	3.93013	0.0216434	0.286874	0.809497	0.952421	5430435G22Rik
ENSMUSG00000042268.10	5.38711	-0.265161	0.488422	0.0720358	0.315641	Slc26a9
ENSMUSG00000042251.12	226.225	0.356176	0.198316	0.00356768	0.0380599	Pm20d1
ENSMUSG00000013275.9	1139.48	0.0842298	0.0989065	0.184347	0.54416	Slc41a1
ENSMUSG00000026433.13	228.326	-0.0873637	0.135952	0.26104	0.640576	Rab29
ENSMUSG00000026434.12	17048.1	-0.355418	0.118937	0.00016062	0.00299368	Nucks1
ENSMUSG00000103569.1	134.596	-0.0527384	0.153013	0.50078	0.834979	RP24-325N3.3
ENSMUSG00000026435.15	133.531	-0.128652	0.155207	0.135111	0.458298	Slc45a3
ENSMUSG00000026436.15	362.438	0.0295687	0.162136	0.704784	0.923089	Elk4
ENSMUSG00000059149.17	220.406	0.0367231	0.173327	0.645398	0.901337	Mfsd4
ENSMUSG00000103966.1	11.4551	0.234535	0.379215	0.0796884	0.335921	RP24-340N18.1
ENSMUSG00000026437.11	513.837	-0.0694791	0.159793	0.389635	0.759201	Cdk18
ENSMUSG00000079330.9	50.9505	-0.129765	0.198882	0.165476	0.513247	Lemd1
ENSMUSG00000118219.1	203.876	-0.191876	0.220095	0.0694848	0.308676	NA
ENSMUSG00000065435.1	10.9907	-0.0322599	0.216723	0.702616	0.922025	Mir135b
ENSMUSG00000101549.1	51.7055	-0.286653	0.258917	0.0234403	0.151525	Gm29630
ENSMUSG00000089808.3	5.10911	-0.201318	0.438558	0.11942	0.427156	Gm7241
ENSMUSG00000042115.4	5.91027	-0.00605396	0.285782	0.945872	0.988037	Klhdc8a
ENSMUSG00000009772.15	155.613	0.467414	0.229944	0.00115268	0.0155242	Nuak2
ENSMUSG00000100658.1	4.69298	0.240983	0.532439	0.0813898	0.340145	F730311O21Rik
ENSMUSG00000042066.16	274.741	-0.0662022	0.119557	0.355086	0.731141	Tmcc2
ENSMUSG00000090079.1	3.10102	-0.111582	0.396611	0.284375	0.665088	Gm15849
ENSMUSG00000042046.15	1088.21	-0.000657027	0.0729173	0.989294	0.997096	Dstyk
ENSMUSG00000097760.2	28.1884	-0.223711	0.283184	0.0629202	0.290434	6030442K20Rik
ENSMUSG00000026439.14	2870.22	-0.0251707	0.071636	0.595519	0.880888	Rbbp5
ENSMUSG00000048174.2	204.107	0.108944	0.139453	0.175802	0.531551	Tmem81
ENSMUSG00000053024.14	366.018	1.3372	0.190822	2.10754e-13	2.418e-11	Cntn2
ENSMUSG00000026442.14	240.292	1.57721	0.280648	1.2672e-09	8.33027e-08	Nfasc
ENSMUSG00000101126.1	7.72574	0.459301	0.663798	0.0227499	0.148749	Gm10538
ENSMUSG00000026443.3	35.0167	0.257857	0.366491	0.0603425	0.282632	Lrrn2
ENSMUSG00000102709.1	1.87081	0.0234381	0.348277	0.791221	NA	RP23-393D20.1
ENSMUSG00000054387.13	6143.29	-0.404864	0.184552	0.000990494	0.0137432	Mdm4
ENSMUSG00000100228.1	2.78519	-0.076924	0.352118	0.430145	0.791131	Gm29257
ENSMUSG00000026447.17	276.94	-0.0050263	0.16064	0.948022	0.988288	Pik3c2b
ENSMUSG00000101102.1	2.37859	-0.0779018	0.372305	0.419855	0.782958	Gm28609
ENSMUSG00000102425.1	15.2757	-0.0732194	0.228519	0.413996	0.778419	RP23-304O9.1
ENSMUSG00000046062.5	6457.24	-0.07662	0.120841	0.290923	0.6719	Ppp1r15b
ENSMUSG00000041757.17	140.692	0.446803	0.297201	0.00477715	0.0477382	Plekha6
ENSMUSG00000101693.1	1.46866	0.0279014	0.374143	0.743922	NA	Gm19461
ENSMUSG00000103421.1	4.57714	-0.0753163	0.310174	0.436973	0.796022	Golt1a
ENSMUSG00000115958.1	6.30948	0.0511094	0.28516	0.579599	0.874948	NA
ENSMUSG00000070645.5	9.20167	0.125716	0.309287	0.234387	0.611794	Ren1
ENSMUSG00000070644.13	272.108	-0.192194	0.147657	0.0355929	0.199614	Etnk2
ENSMUSG00000070643.11	196.091	-0.680192	0.200522	1.44324e-05	0.000384911	Sox13
ENSMUSG00000064814.1	1.78181	-0.0315643	0.377435	0.71152	NA	Gm23939
ENSMUSG00000090553.8	3246.03	-0.0253481	0.127014	0.725291	0.929936	Snrpe
ENSMUSG00000102976.6	523.758	-0.0999586	0.157631	0.231128	0.607688	Zc3h11a
ENSMUSG00000094410.8	3171.11	-0.028873	0.15175	0.706477	0.923504	Zbed6
ENSMUSG00000051998.14	35.409	-0.159509	0.254517	0.130958	0.450408	Lax1
ENSMUSG00000026463.17	645.279	0.132773	0.183055	0.147186	0.481572	Atp2b4
ENSMUSG00000102509.1	2.14104	0.0942593	0.426036	0.315845	0.695695	RP23-18J18.1
ENSMUSG00000010311.15	3.62066	0.0566092	0.327105	0.547746	0.860928	Optc
ENSMUSG00000041577.5	1.64151	0.0611747	0.388233	0.496907	NA	Prelp
ENSMUSG00000020423.6	1056.17	-0.0260047	0.0917618	0.660537	0.906827	Btg2
ENSMUSG00000102380.1	8.0221	-0.0234877	0.240562	0.786053	0.946728	RP23-393C3.4
ENSMUSG00000073559.2	2.77791	0.0112275	0.330691	0.899686	0.977922	Gm8618
ENSMUSG00000026450.14	24.8987	-0.090795	0.200759	0.305266	0.687118	Chit1
ENSMUSG00000064246.10	27.6155	-1.43005	0.396274	1.0381e-05	0.000287911	Chil1
ENSMUSG00000042451.12	6.60642	0.0181458	0.239289	0.833231	0.959719	Mybph
ENSMUSG00000042429.8	2.90172	0.255255	0.596768	0.0580466	0.276511	Adora1
ENSMUSG00000026459.5	5.05783	0.0253083	0.270158	0.776344	0.944188	Myog
ENSMUSG00000026458.13	498.111	-0.00474962	0.119367	0.945812	0.988017	Ppfia4
ENSMUSG00000042305.12	4391.37	-0.0401058	0.104269	0.537473	0.855007	Tmem183a
ENSMUSG00000050526.5	2.69073	0.0970651	0.411029	0.321237	0.699629	4933406M09Rik
ENSMUSG00000026456.18	2323.55	-0.398057	0.125735	5.47776e-05	0.00122459	Cyb5r1
ENSMUSG00000026457.14	3056.79	-0.0493667	0.100719	0.436943	0.796022	Adipor1
ENSMUSG00000101061.1	24.3292	-0.0225137	0.189105	0.780641	0.945804	Gm29643
ENSMUSG00000102722.1	9.63961	-0.0379416	0.24045	0.664217	0.908444	RP24-547I3.2
ENSMUSG00000026455.14	1629.74	-0.020508	0.0917312	0.729302	0.930494	Klhl12
ENSMUSG00000042229.9	1359.27	-0.0968927	0.119615	0.186682	0.547235	Rabif
ENSMUSG00000077202.1	3.21796	-0.0262815	0.307033	0.771666	0.943208	Gm25612
ENSMUSG00000096712.1	3.71912	-0.0353225	0.288435	0.697363	0.920253	Gm15454
ENSMUSG00000101955.1	5.68164	-0.0839782	0.303609	0.391354	0.760068	Gm29376
ENSMUSG00000046367.10	24.7657	0.107808	0.226601	0.251721	0.631682	Mgat4e
ENSMUSG00000042207.17	23060.1	0.0522718	0.0956284	0.391243	0.760068	Kdm5b
ENSMUSG00000097435.1	4.73882	-0.0393487	0.295398	0.667122	0.909686	Gm26783
ENSMUSG00000026452.15	18.0477	0.933163	0.639217	0.00219383	0.0260295	Syt2
ENSMUSG00000073557.12	352.928	0.00548103	0.131709	0.939981	0.986968	Ppp1r12b
ENSMUSG00000103614.1	3.89007	0.358789	0.726753	0.0213053	0.142326	RP24-541A5.3
ENSMUSG00000077846.1	1.30313	0.0561982	0.428823	0.465559	NA	Gm22232
ENSMUSG00000103976.1	51.6332	-0.0284715	0.181682	0.722852	0.929833	RP24-541A5.1
ENSMUSG00000101168.1	5.98829	-0.0329915	0.29111	0.716177	0.92682	Gm28892
ENSMUSG00000026429.9	886.31	0.0455288	0.104583	0.485175	0.826857	Ube2t
ENSMUSG00000042793.13	23.5775	1.02529	0.569381	0.00100258	0.0138635	Lgr6
ENSMUSG00000097993.7	280.423	-0.00161255	0.101525	0.979828	0.99569	Ptprv
ENSMUSG00000097988.1	4.47816	0.0687305	0.315203	0.47403	0.819928	Gm10535
ENSMUSG00000031506.11	62.5855	0.146351	0.187587	0.119888	0.428324	Ptpn7
ENSMUSG00000026426.10	516.843	-0.11715	0.146069	0.157487	0.499617	Arl8a
ENSMUSG00000087721.1	12.6266	-0.211747	0.35404	0.0946777	0.372087	Gm26280
ENSMUSG00000085311.1	7.03983	-0.356113	0.563433	0.0398621	0.215801	Gm15445
ENSMUSG00000026424.8	5.65476	-0.0513726	0.271465	0.573906	0.872835	Gpr37l1
ENSMUSG00000079139.4	275.654	-0.039551	0.134567	0.594608	0.88066	Gm4204
ENSMUSG00000097680.1	18.4296	0.0848995	0.212061	0.3411	0.719179	Gm26642
ENSMUSG00000003051.13	1220.46	-0.259894	0.205346	0.0208021	0.139776	Elf3
ENSMUSG00000041926.15	803.776	0.0657929	0.0973034	0.288301	0.669436	Rnpep
ENSMUSG00000062580.9	2311.03	-0.00573265	0.105676	0.930171	0.985175	Timm17a
ENSMUSG00000048096.7	17.4803	0.919447	0.620222	0.00215621	0.0256834	Lmod1
ENSMUSG00000041889.7	32.3195	0.108096	0.198514	0.232584	0.609458	Shisa4
ENSMUSG00000041879.13	4145.55	-0.0338487	0.104174	0.602271	0.882953	Ipo9
ENSMUSG00000100620.1	7.6856	-0.0643401	0.273628	0.489198	0.828393	Gm28277
ENSMUSG00000009418.16	737.796	-0.0156501	0.207578	0.84991	0.964813	Nav1
ENSMUSG00000102474.1	3.94694	0.0444437	0.310605	0.630592	0.894859	RP23-2M16.4
ENSMUSG00000104524.1	9.20632	-0.0358635	0.253953	0.685386	0.916826	RP24-331B5.1
ENSMUSG00000054412.5	8.32015	-0.0599985	0.271081	0.515666	0.842916	Gm4793
ENSMUSG00000026421.14	1859.92	-0.0967478	0.12468	0.197924	0.564573	Csrp1
ENSMUSG00000041801.5	1372.87	-0.0484295	0.0973979	0.433837	0.793622	Phlda3
ENSMUSG00000026418.16	90.2725	-0.0969952	0.168928	0.25391	0.633752	Tnni1
ENSMUSG00000041782.14	219.39	-0.218802	0.15971	0.0247543	0.15726	Lad1
ENSMUSG00000026414.13	12.6539	0.343128	0.442332	0.0352631	0.198359	Tnnt2
ENSMUSG00000026413.12	2.52695	0.0898673	0.39366	0.358267	0.733277	Pkp1
ENSMUSG00000026411.17	517.057	-0.00528575	0.100311	0.933421	0.985923	Tmem9
ENSMUSG00000026407.17	133.684	1.98993	0.197396	4.54421e-25	2.63164e-22	Cacna1s
ENSMUSG00000102717.1	3.56179	0.338941	0.615001	0.0417253	0.223101	RP23-211F21.1
ENSMUSG00000086264.9	6.36704	-0.265963	0.51049	0.0716383	0.314693	Gm15850
ENSMUSG00000041642.18	477.8	-0.281265	0.223706	0.0180914	0.126812	Kif21b
ENSMUSG00000087230.10	6.25673	0.239899	0.482074	0.087172	0.354148	Mroh3
ENSMUSG00000041605.16	197.619	0.072706	0.151506	0.361898	0.736901	5730559C18Rik
ENSMUSG00000097433.1	4.98433	0.061352	0.308243	0.51686	0.843342	Gm26781
ENSMUSG00000041570.14	2299.76	0.0577706	0.0819606	0.275255	0.656741	Camsap2
ENSMUSG00000097403.2	17.913	-0.134447	0.271676	0.193997	0.559322	9230116N13Rik
ENSMUSG00000026404.12	728.514	-0.0426374	0.104876	0.513933	0.842232	Ddx59
ENSMUSG00000041498.13	1570.33	0.0343154	0.114175	0.617543	0.889279	Kif14
ENSMUSG00000099337.1	3.54021	0.127149	0.399708	0.242112	0.620919	Gm29486
ENSMUSG00000101413.1	1.5793	-0.0358381	0.36635	0.68362	NA	Gm29485
ENSMUSG00000104414.1	2.79671	0.0298824	0.327572	0.741467	0.93541	RP24-68C1.3
ENSMUSG00000104509.1	19.1309	0.172002	0.335524	0.141337	0.471623	RP24-68C1.4
ENSMUSG00000104366.1	16.8721	0.111715	0.285343	0.269261	0.649467	RP24-68C1.5
ENSMUSG00000097229.1	93.637	0.0226432	0.130227	0.755726	0.939185	Gm26598
ENSMUSG00000041483.14	3708.11	0.0221063	0.0833054	0.686215	0.916826	Zfp281
ENSMUSG00000097113.7	126.361	0.197143	0.188154	0.0506992	0.25383	Gm19705
ENSMUSG00000097448.1	47.149	0.474825	0.337271	0.00558117	0.0538053	Gm16880
ENSMUSG00000103953.1	37.7069	0.0421191	0.193281	0.609706	0.885815	RP23-302C16.4
ENSMUSG00000026398.14	2814.82	-0.0017954	0.0685004	0.968994	0.992992	Nr5a2
ENSMUSG00000026393.10	1034.27	-0.106619	0.118949	0.1489	0.485091	Nek7
ENSMUSG00000099510.2	2.93855	0.0405922	0.328505	0.658339	0.905745	Gm28501
ENSMUSG00000102651.1	3.60081	-0.0455663	0.329581	0.622085	0.890385	RP23-209N14.3
ENSMUSG00000102448.1	10.937	-0.00136325	0.225984	0.987127	0.996732	RP23-209N14.4
ENSMUSG00000019230.14	3.81841	-0.950134	1.154	0.00114313	0.0154212	Lhx9
ENSMUSG00000079283.2	174.919	0.0623162	0.142298	0.419742	0.782882	2310009B15Rik
ENSMUSG00000056268.15	2130.28	-0.11519	0.110673	0.106145	0.399404	Dennd1b
ENSMUSG00000104436.1	25.6125	-0.0248951	0.178628	0.754915	0.939033	RP23-114L12.3
ENSMUSG00000104900.1	6.50817	-0.0762403	0.286534	0.425341	0.786846	NA
ENSMUSG00000102626.1	6.24759	0.140411	0.375646	0.211913	0.584062	RP23-114L12.2
ENSMUSG00000085361.2	4.98626	0.118657	0.371053	0.267807	0.648147	Gm16305
ENSMUSG00000102157.1	20.834	-0.284388	0.378356	0.0481545	0.245085	RP23-114L12.6
ENSMUSG00000105936.1	18.5383	-0.0150992	0.196556	0.852892	0.965553	NA
ENSMUSG00000102451.1	41.9069	-0.143675	0.227879	0.149128	0.485445	RP24-260D21.2
ENSMUSG00000102243.1	14.2423	-0.042328	0.254848	0.634811	0.897023	RP24-260D21.1
ENSMUSG00000033964.12	869.236	0.0336018	0.0870766	0.55246	0.862705	Zbtb41
ENSMUSG00000033952.14	5037.23	-0.223918	0.0920798	0.00299027	0.033196	Aspm
ENSMUSG00000026368.6	4.02504	0.28737	0.591727	0.0549667	0.267071	F13b
ENSMUSG00000089991.2	15.1829	1.98694	0.62918	1.76566e-05	0.000461304	Gm16332
ENSMUSG00000104496.1	25.5285	1.27935	0.467108	0.000109846	0.00217395	RP23-13N24.1
ENSMUSG00000085867.1	2.38847	0.213718	0.531912	0.0933452	0.368517	Gm5834
ENSMUSG00000026365.15	43.0141	1.14074	0.372676	5.60788e-05	0.00124794	Cfh
ENSMUSG00000052726.16	58.1939	0.0307549	0.177737	0.700483	0.92103	Kcnt2
ENSMUSG00000102698.1	10.4102	-0.032912	0.244545	0.70666	0.923545	RP24-351P4.1
ENSMUSG00000102368.1	1.81504	-0.00132393	0.360004	0.987695	NA	RP24-359F24.1
ENSMUSG00000101795.2	39.7853	-0.0823417	0.202867	0.348093	0.724781	Gm5835
ENSMUSG00000026361.9	1936.01	0.0431811	0.20347	0.606189	0.884986	Cdc73
ENSMUSG00000033849.3	178.045	0.00716609	0.164473	0.926402	0.984126	B3galt2
ENSMUSG00000089640.1	4.03593	-0.0761768	0.361049	0.431938	0.79219	Gm6397
ENSMUSG00000018196.18	594.026	0.836426	0.133381	4.36803e-11	3.62606e-09	Glrx2
ENSMUSG00000018199.9	2202.52	-0.101017	0.110854	0.150008	0.486979	Trove2
ENSMUSG00000018189.12	1042.39	0.00199352	0.0770997	0.969109	0.992992	Uchl5
ENSMUSG00000100455.1	90.6007	-0.0216619	0.16224	0.7804	0.945735	Gm29170
ENSMUSG00000026360.9	9.82331	0.160082	0.35112	0.166694	0.515097	Rgs2
ENSMUSG00000100441.1	2.13763	0.0743277	0.383149	0.431518	0.791898	Gm7266
ENSMUSG00000035131.14	33.3043	0.125007	0.224805	0.194569	0.559924	Brinp3
ENSMUSG00000056220.14	156.443	0.109852	0.175336	0.209372	0.58121	Pla2g4a
ENSMUSG00000032487.8	68.1806	-0.0662886	0.153474	0.404416	0.770231	Ptgs2
ENSMUSG00000099875.1	7.4827	-0.02583	0.250029	0.767929	0.942673	Gm15453
ENSMUSG00000100690.1	90.5237	-0.0888464	0.177035	0.29733	0.678166	Gm4322
ENSMUSG00000006007.14	1.95027	0.0320525	0.355793	0.717958	0.927792	Pdc
ENSMUSG00000006010.14	861.322	-0.0100233	0.118186	0.885464	0.974067	BC003331
ENSMUSG00000006005.18	13527.5	-0.0285437	0.0759814	0.568594	0.870518	Tpr
ENSMUSG00000006014.16	48.2857	-0.0661782	0.190572	0.433068	0.793305	Prg4
ENSMUSG00000066842.18	387.771	1.17007	0.221756	1.27598e-08	7.20083e-07	Hmcn1
ENSMUSG00000093650.2	2.76826	-0.0672352	0.339072	0.483095	0.825353	Gm20631
ENSMUSG00000097426.1	1.6372	0.0723387	0.405878	0.421919	NA	Gm8941
ENSMUSG00000114694.1	3.01422	0.0698173	0.336932	0.468874	0.815592	NA
ENSMUSG00000100954.4	24.3576	0.022864	0.174577	0.7728	0.943495	Gm10138
ENSMUSG00000023150.14	4441.24	0.151024	0.123076	0.0580292	0.276483	Ivns1abp
ENSMUSG00000052748.14	2022.16	-0.0065639	0.0816468	0.903365	0.978574	Swt1
ENSMUSG00000053286.11	699.742	0.0787453	0.0972555	0.206418	0.577154	Trmt1l
ENSMUSG00000103928.1	34.3542	0.0245697	0.180794	0.758703	0.939935	RP24-167M10.4
ENSMUSG00000026484.13	3672.28	-0.044202	0.103122	0.493644	0.831187	Rnf2
ENSMUSG00000103238.1	79.0632	-0.0594255	0.168419	0.463243	0.811987	RP24-395F2.1
ENSMUSG00000100551.1	1.31491	-0.0803799	0.408635	0.383934	NA	Gm19503
ENSMUSG00000026483.13	682.386	-0.257715	0.137191	0.00686992	0.0624195	Fam129a
ENSMUSG00000100594.1	12.7178	-0.175124	0.32857	0.13413	0.456579	2810414N06Rik
ENSMUSG00000043019.12	2439.47	0.122332	0.109842	0.0876881	0.355026	Edem3
ENSMUSG00000032666.16	342.235	0.235171	0.166469	0.0197999	0.135545	1700025G04Rik
ENSMUSG00000014980.14	630.838	0.00757087	0.108033	0.90908	0.979775	Tsen15
ENSMUSG00000032649.14	16.4795	1.00398	0.59787	0.00130506	0.0171398	Colgalt2
ENSMUSG00000026482.13	137.007	0.322325	0.188281	0.0054279	0.0526827	Rgl1
ENSMUSG00000080950.1	10.8826	0.248262	0.399828	0.0732845	0.318588	Gm7278
ENSMUSG00000099868.1	1.42816	0.0515341	0.415981	0.519854	NA	Gm28792
ENSMUSG00000055547.4	1.96862	0.0871175	0.416318	0.350114	0.726273	Apobec4
ENSMUSG00000008475.13	1675.45	-0.0141547	0.0798916	0.789203	0.947518	Arpc5
ENSMUSG00000026480.12	305.903	-0.231256	0.153268	0.0173797	0.123739	Ncf2
ENSMUSG00000042772.15	3979.69	-0.0936492	0.130435	0.222169	0.596516	Smg7
ENSMUSG00000100394.1	32.5624	-0.0237964	0.230958	0.780956	0.945804	Gm28791
ENSMUSG00000100702.1	1.32167	-0.0601434	0.389061	0.502125	NA	Gm8976
ENSMUSG00000042751.14	563.133	0.0883513	0.109451	0.198563	0.565213	Nmnat2
ENSMUSG00000099969.1	1.8354	-0.0159387	0.33733	0.857684	NA	Gm28960
ENSMUSG00000026479.13	649.725	-0.390807	0.118515	3.72246e-05	0.000875643	Lamc2
ENSMUSG00000026478.14	8987.59	-0.146287	0.152669	0.0945425	0.371736	Lamc1
ENSMUSG00000103818.1	31.0603	-0.080023	0.235864	0.380775	0.751448	RP24-571N3.1
ENSMUSG00000079138.3	14.4637	-0.0720571	0.287112	0.448529	0.802506	Gm8818
ENSMUSG00000073538.10	128.977	-0.177915	0.186241	0.0695416	0.308717	E330020D12Rik
ENSMUSG00000042708.12	83.3414	0.159771	0.210364	0.108351	0.404167	Shcbp1l
ENSMUSG00000064435.1	3.48173	0.0584587	0.343158	0.53442	0.853493	Gm25588
ENSMUSG00000103543.1	14.7604	0.0314578	0.215083	0.708909	0.92435	RP23-1K14.2
ENSMUSG00000042699.11	8586.43	0.0846248	0.174182	0.315884	0.695695	Dhx9
ENSMUSG00000042684.8	347.803	0.82004	0.226741	9.60501e-06	0.00026915	Npl
ENSMUSG00000099858.1	2.70879	-0.157065	0.463826	0.165977	0.514405	Gm6652
ENSMUSG00000042671.12	2.42852	0.0349122	0.381455	0.681735	0.915449	Rgs8
ENSMUSG00000026475.7	35.9166	0.458468	0.363501	0.00828691	0.0719096	Rgs16
ENSMUSG00000099568.1	1.91865	0.150636	0.469945	0.169863	NA	Gm28513
ENSMUSG00000066800.11	53.6799	0.419512	0.325678	0.00873219	0.0748394	Rnasel
ENSMUSG00000100183.1	6.36502	0.149591	0.384337	0.193006	0.557597	Gm28512
ENSMUSG00000045968.7	8.04139	-0.0257321	0.252665	0.769365	0.942924	Teddm2
ENSMUSG00000026473.16	3703.07	0.27867	0.151937	0.00612905	0.0576031	Glul
ENSMUSG00000004110.17	6.21977	0.529911	0.745427	0.0156103	0.114744	Cacna1e
ENSMUSG00000101880.1	2.48701	0.084863	0.397579	0.375351	0.746741	Gm29282
ENSMUSG00000096950.2	6.85194	0.0519351	0.266535	0.568322	0.870485	Gm9530
ENSMUSG00000056708.5	239.804	1.01467	0.196855	2.64155e-08	1.38173e-06	Ier5
ENSMUSG00000026471.14	2.17527	0.054632	0.373827	0.546657	0.860404	Mr1
ENSMUSG00000026470.14	778.839	0.0703546	0.112927	0.310174	0.691186	Stx6
ENSMUSG00000104181.1	8.52145	0.0897216	0.297063	0.362256	0.737265	RP24-290D14.2
ENSMUSG00000033722.9	136.662	0.0545458	0.140276	0.474697	0.820382	BC034090
ENSMUSG00000103670.1	2.27364	-0.017835	0.327619	0.842176	0.963058	RP23-320I7.3
ENSMUSG00000026469.14	1391.71	0.271691	0.191678	0.0143565	0.107855	Xpr1
ENSMUSG00000073535.5	1.57447	-0.0118283	0.397044	0.879131	NA	Gm5532
ENSMUSG00000033701.13	542.317	0.0190458	0.0863781	0.736005	0.932874	Acbd6
ENSMUSG00000026468.14	2.54407	0.121437	0.397773	0.256896	0.636987	Lhx4
ENSMUSG00000033684.14	293.142	0.397576	0.162332	0.000518945	0.0080448	Qsox1
ENSMUSG00000102558.1	4.40309	0.0677373	0.307546	0.478531	0.822566	RP24-429M15.3
ENSMUSG00000033671.18	2659.14	0.0216288	0.113212	0.751094	0.937586	Cep350
ENSMUSG00000103717.1	1.47595	-0.116705	0.431259	0.25273	NA	RP24-429M15.5
ENSMUSG00000103771.1	2.88284	-0.0132527	0.307302	0.882662	0.973182	RP24-429M15.4
ENSMUSG00000102837.1	2.35967	-0.0735244	0.36079	0.445305	0.800485	RP24-310B3.2
ENSMUSG00000102833.1	2.16879	-0.047238	0.344758	0.607782	0.885396	RP24-310B3.1
ENSMUSG00000026466.16	234.837	0.0426746	0.112575	0.532378	0.852344	Tor1aip1
ENSMUSG00000102964.1	16.0279	0.081661	0.268076	0.389269	0.758974	RP24-321N12.1
ENSMUSG00000050565.16	6484.29	-0.0237078	0.0757031	0.636121	0.897694	Tor1aip2
ENSMUSG00000015484.3	6.6414	0.509879	0.67724	0.017958	0.12624	Fam163a
ENSMUSG00000060985.15	127.232	1.12067	0.19648	1.32303e-09	8.67384e-08	Tdrd5
ENSMUSG00000026602.9	1.3759	0.171818	0.531328	0.10382	NA	Nphs2
ENSMUSG00000026601.14	7.60483	0.149587	0.351176	0.187635	0.548804	Axdnd1
ENSMUSG00000078193.2	63.5506	-0.0288012	0.154784	0.708641	0.92435	Gm2000
ENSMUSG00000026600.12	3327.23	0.273321	0.0900362	0.000399009	0.0064917	Soat1
ENSMUSG00000103199.1	14.4188	0.00197556	0.213342	0.981037	0.996191	RP24-228M19.3
ENSMUSG00000101523.2	112.927	-0.0398252	0.123926	0.579235	0.874948	Csnk2a1
ENSMUSG00000026596.13	3344.69	0.0509045	0.145193	0.5083	0.839163	Abl2
ENSMUSG00000104293.1	48.4671	0.0343165	0.19537	0.676323	0.912567	RP23-363M8.2
ENSMUSG00000060519.11	298.751	-0.210797	0.14545	0.0233231	0.15114	Tor3a
ENSMUSG00000033557.17	1197.52	0.0134289	0.0759755	0.790853	0.947518	Fam20b
ENSMUSG00000046057.4	1.70838	-0.0523864	0.367579	0.564588	NA	Gm15428
ENSMUSG00000026594.14	1531.46	-0.0678153	0.110932	0.321604	0.700051	Ralgps2
ENSMUSG00000101964.1	8.34448	-0.0128067	0.243037	0.88212	0.972926	Gm28693
ENSMUSG00000033544.6	9.99963	0.0282229	0.246346	0.746566	0.936522	Angptl1
ENSMUSG00000103303.1	7.35915	0.0307683	0.274756	0.731695	0.93168	RP24-444I15.1
ENSMUSG00000102960.1	14.346	-0.102544	0.267608	0.294879	0.675934	RP24-444I15.4
ENSMUSG00000101905.1	8.32439	0.309686	0.503703	0.0523124	0.259038	4930439D14Rik
ENSMUSG00000103325.1	1.73681	-0.0318172	0.362695	0.717179	NA	RP24-329K22.1
ENSMUSG00000026592.13	4.63366	0.244322	0.50064	0.0837224	0.346147	Tex35
ENSMUSG00000109913.1	6.66596	0.132176	0.35706	0.229571	0.606387	NA
ENSMUSG00000070565.11	724.276	0.0585765	0.113831	0.397605	0.764441	Rasal2
ENSMUSG00000102326.1	3.31735	0.0878682	0.367627	0.376807	0.748293	RP24-227F14.5
ENSMUSG00000102391.1	2.43322	0.161403	0.484996	0.149051	0.485341	RP24-227F14.4
ENSMUSG00000087632.1	3.05872	0.134231	0.4038	0.224913	0.600501	Gm6058
ENSMUSG00000103808.1	18.4383	0.0416308	0.214798	0.624008	0.891567	RP24-227F14.1
ENSMUSG00000049881.13	1306.04	0.0186314	0.125771	0.794931	0.948787	2810025M15Rik
ENSMUSG00000033488.11	208.062	0.00680269	0.0990872	0.91367	0.980618	BC026585
ENSMUSG00000026589.14	5.1502	0.380688	0.65575	0.032045	0.186823	Sec16b
ENSMUSG00000004031.13	19.0529	0.250383	0.35469	0.0625836	0.289379	Brinp2
ENSMUSG00000026587.15	8.09791	2.17262	0.839439	3.46373e-05	0.000826774	Astn1
ENSMUSG00000073530.11	2.61715	0.191702	0.500409	0.117892	0.423996	Pappa2
ENSMUSG00000040782.12	2095.17	-0.0215001	0.0876257	0.706616	0.923545	Rfwd2
ENSMUSG00000103572.1	54.9187	-0.0421813	0.152196	0.586126	0.878419	RP23-375F6.4
ENSMUSG00000103186.1	8.47605	-0.0906023	0.2709	0.347334	0.724235	RP23-145H3.4
ENSMUSG00000089536.1	1.7555	0.0650912	0.404144	0.459578	NA	Scarna3a
ENSMUSG00000090394.8	5.20387	0.191383	0.416431	0.129589	0.447534	4930523C07Rik
ENSMUSG00000058267.13	1040.9	-0.0938841	0.131446	0.222883	0.597337	Mrps14
ENSMUSG00000014226.10	4636.3	-0.0538263	0.124642	0.458412	0.808251	Cacybp
ENSMUSG00000103006.1	49.0852	-0.0107466	0.144038	0.886044	0.974156	RP23-71J17.5
ENSMUSG00000026721.16	662.482	-0.0110298	0.0859697	0.844914	0.963451	Rabgap1l
ENSMUSG00000104302.1	2.449	0.0608296	0.378736	0.505971	0.837626	RP24-540L1.1
ENSMUSG00000103522.1	1.95463	-0.0898969	0.420886	0.335521	0.714988	RP24-540L1.3
ENSMUSG00000103693.1	4.66168	0.073253	0.334048	0.450412	0.80436	RP24-540L1.2
ENSMUSG00000104026.1	5.07681	-0.0650239	0.353861	0.493037	0.830595	RP24-546N2.5
ENSMUSG00000118401.1	3.31241	0.0246713	0.331341	0.783789	0.94624	NA
ENSMUSG00000104020.1	4.66822	0.0288653	0.322085	0.750156	0.93704	RP24-546N2.4
ENSMUSG00000103391.1	2.32715	-0.0402867	0.362941	0.651376	0.903222	RP24-546N2.3
ENSMUSG00000103432.1	5.8152	-0.0417905	0.285967	0.647198	0.902112	RP24-546N2.2
ENSMUSG00000102172.1	2.59579	-0.126395	0.457495	0.211624	0.583664	RP24-546N2.1
ENSMUSG00000103200.1	3.41608	-0.041363	0.322125	0.653111	0.903895	RP24-400M20.3
ENSMUSG00000103632.1	2.83218	-0.155149	0.425796	0.181117	0.539199	RP24-400M20.2
ENSMUSG00000104053.1	2.89584	0.0239372	0.319674	0.790898	0.947518	RP24-400M20.1
ENSMUSG00000040423.11	2056.65	0.00473801	0.128364	0.9476	0.988288	Rc3h1
ENSMUSG00000103343.1	32.7265	-0.138815	0.233085	0.163121	0.50873	RP24-188H2.3
ENSMUSG00000103846.1	11.1622	0.0195837	0.234057	0.819273	0.955317	RP24-188H2.4
ENSMUSG00000103739.1	56.8064	-0.02955	0.163786	0.705682	0.923183	RP24-188H2.5
ENSMUSG00000026715.12	19.0005	0.229271	0.346485	0.0764134	0.326874	Serpinc1
ENSMUSG00000103222.1	2.25834	0.0100244	0.340182	0.909669	0.979898	RP24-188H2.6
ENSMUSG00000043467.19	703.734	-0.0252867	0.125453	0.724549	0.929936	Zbtb37
ENSMUSG00000104016.1	13.8435	-0.170204	0.330573	0.142748	0.473808	RP24-297J20.5
ENSMUSG00000053332.13	5473.89	-0.298538	0.212855	0.0121013	0.0943702	Gas5
ENSMUSG00000026709.10	1387.55	-0.0543123	0.114507	0.433588	0.793622	Dars2
ENSMUSG00000026708.16	276.518	-0.0366597	0.150017	0.633236	0.896535	Cenpl
ENSMUSG00000026705.16	901.946	-0.051592	0.0892006	0.368933	0.740634	Klhl20
ENSMUSG00000044835.15	155.607	1.19427	0.187387	1.9965e-11	1.73431e-09	Ankrd45
ENSMUSG00000049160.15	7.70394	0.0617991	0.254362	0.497164	0.833019	4930469G21Rik
ENSMUSG00000102817.2	12.3804	0.383878	0.553767	0.0332767	0.191027	RP23-16I21.1
ENSMUSG00000026701.15	4111.69	0.769515	0.166319	1.63771e-07	7.01304e-06	Prdx6
ENSMUSG00000040323.13	3.98674	0.0620645	0.314052	0.513198	0.841643	Gm15429
ENSMUSG00000000817.10	1.26362	0.0738865	0.419483	0.397569	NA	Fasl
ENSMUSG00000103625.1	8.08454	0.0838655	0.276638	0.382054	0.752689	RP24-75E15.5
ENSMUSG00000040297.12	2473.07	0.0308387	0.0779959	0.547259	0.860415	Suco
ENSMUSG00000102254.1	3.48495	-0.187667	0.467656	0.131197	0.451103	RP24-75E15.4
ENSMUSG00000103158.5	4.68078	-0.150729	0.410743	0.19073	0.553662	RP24-75E15.3
ENSMUSG00000026698.8	305.97	-0.246359	0.190193	0.0219961	0.145186	Pigc
ENSMUSG00000040265.16	3.98309	0.0543506	0.305258	0.561351	0.866739	Dnm3
ENSMUSG00000026694.19	887.899	0.0099428	0.0785406	0.849048	0.964793	Mettl13
ENSMUSG00000026696.15	354.421	-0.0217182	0.103692	0.737078	0.933359	Vamp4
ENSMUSG00000040225.15	12753.2	0.0193545	0.184126	0.809176	0.952421	Prrc2c
ENSMUSG00000098259.1	13.229	-0.139245	0.29354	0.191856	0.555735	Gm27616
ENSMUSG00000026692.12	3.42641	0.0508166	0.322215	0.58605	0.878419	Fmo4
ENSMUSG00000040181.14	3.87872	0.0759495	0.334042	0.436333	0.795452	Fmo1
ENSMUSG00000040124.5	419.662	-0.148083	0.137851	0.0777382	0.330911	Gorab
ENSMUSG00000088951.1	3.41951	-0.242838	0.539131	0.0791769	0.334576	Gm24940
ENSMUSG00000102117.1	3.02609	-0.0385713	0.342801	0.671094	0.911446	Rpsa-ps1
ENSMUSG00000026585.13	1690.85	-0.0623387	0.0828058	0.243945	0.623133	Kifap3
ENSMUSG00000026584.14	737.962	-0.0202569	0.0796418	0.70037	0.92103	Scyl3
ENSMUSG00000041406.14	2549.27	0.0124433	0.0874961	0.827726	0.95843	BC055324
ENSMUSG00000041396.13	368.86	-0.00055607	0.11208	0.993444	0.997957	Mettl18
ENSMUSG00000026581.14	1.65892	0.085731	0.435384	0.328932	NA	Sell
ENSMUSG00000026580.16	1.35735	0.0453445	0.377565	0.606247	NA	Selp
ENSMUSG00000026579.8	19.3035	0.2131	0.321609	0.0842409	0.34764	F5
ENSMUSG00000040918.12	1909.14	0.00849043	0.0790988	0.871734	0.971054	Slc19a2
ENSMUSG00000026578.6	193.072	-0.208714	0.205929	0.048314	0.245662	Ccdc181
ENSMUSG00000026577.13	792.618	-0.0767398	0.102499	0.237174	0.614369	Blzf1
ENSMUSG00000026575.15	1310.7	-0.103018	0.143156	0.202477	0.570931	Nme7
ENSMUSG00000103493.1	18.2505	-0.0965024	0.269759	0.32072	0.699317	RP24-73O16.3
ENSMUSG00000026576.12	1577.6	-0.0843283	0.14112	0.284023	0.664705	Atp1b1
ENSMUSG00000104011.1	7.03481	-0.00163985	0.242789	0.984818	0.996627	RP24-272N10.3
ENSMUSG00000103226.1	2.29054	0.0209287	0.387334	0.797451	0.949414	RP24-272N10.4
ENSMUSG00000097281.2	9.94703	-0.0506347	0.243466	0.568456	0.870507	Gm26685
ENSMUSG00000102389.1	5.77122	-0.0217973	0.276626	0.807138	0.951646	RP24-272N10.6
ENSMUSG00000040848.11	401.784	-0.166683	0.125057	0.042258	0.224468	Sft2d2
ENSMUSG00000040843.10	1044.49	-0.0211811	0.0856487	0.705518	0.923183	Tiprl
ENSMUSG00000102302.1	52.9212	0.00645933	0.206144	0.937473	0.986663	RP23-187M7.5
ENSMUSG00000040836.15	224.696	1.23785	0.18024	6.61227e-13	7.21212e-11	Gpr161
ENSMUSG00000026571.12	634.204	0.0370782	0.0820911	0.488528	0.82805	Dcaf6
ENSMUSG00000104427.1	2.30467	0.0601884	0.376992	0.510839	0.840672	RP23-294I9.3
ENSMUSG00000089299.1	1.59907	0.139687	0.480438	0.171808	NA	Gm24637
ENSMUSG00000102401.1	27.3884	0.0517318	0.220696	0.549573	0.861952	RP24-323I23.1
ENSMUSG00000026568.6	400.186	-0.0508233	0.1181	0.470849	0.817274	Mpc2
ENSMUSG00000103763.1	7.93284	-0.00781442	0.256428	0.928776	0.984899	RP24-323I23.2
ENSMUSG00000026567.16	19.9829	0.300722	0.41549	0.0468589	0.240656	Adcy10
ENSMUSG00000104474.1	1.91392	0.0299524	0.352011	0.736124	NA	RP23-469D21.3
ENSMUSG00000026566.15	800.275	0.0147673	0.153563	0.846724	0.963807	Mpzl1
ENSMUSG00000103098.1	4.0275	-0.107012	0.385949	0.301503	0.683242	RP23-469D21.5
ENSMUSG00000104517.1	1.90128	0.168085	0.491511	0.13939	NA	RP23-469D21.6
ENSMUSG00000040723.14	27.9611	1.28559	0.394652	3.10028e-05	0.000755591	Rcsd1
ENSMUSG00000040713.12	608.265	0.0494538	0.117199	0.480744	0.823751	Creg1
ENSMUSG00000104306.1	1.79672	0.0596886	0.373796	0.515724	NA	RP23-132G24.4
ENSMUSG00000089829.2	8.97433	0.0385362	0.23868	0.658795	0.906008	Gm16565
ENSMUSG00000005763.15	12.0488	0.0213902	0.241352	0.80471	0.951058	Cd247
ENSMUSG00000026565.18	2765.89	-0.0832653	0.158695	0.309524	0.690439	Pou2f1
ENSMUSG00000099008.1	13.9209	-0.0521007	0.220011	0.546533	0.860404	Gm17976
ENSMUSG00000026564.9	429.644	-0.642591	0.183399	8.6321e-06	0.000246141	Dusp27
ENSMUSG00000000544.14	824.028	-0.970633	0.116715	1.68704e-17	3.41948e-15	Gpa33
ENSMUSG00000040629.8	259.572	1.14868	0.224972	3.10928e-08	1.59551e-06	Mael
ENSMUSG00000040612.13	25.894	0.192377	0.296411	0.0988639	0.382482	Ildr2
ENSMUSG00000103400.2	3.37494	-0.299819	0.590058	0.0525519	0.259907	RP24-229G16.1
ENSMUSG00000026563.13	74.7228	-0.324923	0.25569	0.0134994	0.102737	Tada1
ENSMUSG00000040596.15	228.095	0.121612	0.132338	0.126918	0.442079	Pogk
ENSMUSG00000084093.1	2.42429	-0.00372005	0.323465	0.966738	0.992819	Gm16418
ENSMUSG00000051081.7	1.38957	0.14231	0.518315	0.115883	NA	Gm4847
ENSMUSG00000086925.1	2.08465	0.0143255	0.369943	0.865687	0.969528	Gm6286
ENSMUSG00000097823.2	1.80985	-0.0560717	0.374724	0.537099	NA	Gm16701
ENSMUSG00000060568.14	7.5929	0.447582	0.603923	0.0239049	0.153373	Fam78b
ENSMUSG00000026558.13	10487.7	-0.0145032	0.088465	0.801413	0.950099	Uck2
ENSMUSG00000103139.1	19.4401	-0.157964	0.321165	0.161646	0.506012	RP23-79H24.3
ENSMUSG00000052428.10	1201.16	-0.0861871	0.136163	0.267274	0.647327	Tmco1
ENSMUSG00000088246.1	1.08408	-0.170411	0.558228	0.0681126	NA	Gm25911
ENSMUSG00000026687.14	2019.21	0.0720973	0.100479	0.258105	0.637984	Aldh9a1
ENSMUSG00000026688.5	403.571	-0.0173494	0.131349	0.81187	0.953162	Mgst3
ENSMUSG00000015843.10	3.96889	0.159176	0.469072	0.16084	0.505104	Rxrg
ENSMUSG00000026686.14	30.025	1.2316	0.464987	0.00013992	0.00266505	Lmx1a
ENSMUSG00000052534.15	348.523	0.220835	0.367366	0.0890115	0.358245	Pbx1
ENSMUSG00000103780.1	7.29976	0.315468	0.521545	0.0509409	0.254387	RP24-93F24.2
ENSMUSG00000102594.1	10.5699	0.43312	0.529653	0.0230548	0.149856	RP24-93F24.1
ENSMUSG00000026683.14	1038.4	-0.305048	0.134182	0.00188331	0.0231002	Nuf2
ENSMUSG00000026678.10	4.95636	0.767217	0.884313	0.00585545	0.0558299	Rgs5
ENSMUSG00000070532.5	7.20753	-0.917256	0.865139	0.00368815	0.0390294	1700084C01Rik
ENSMUSG00000026675.12	545.507	0.12848	0.118099	0.0889163	0.358005	Hsd17b7
ENSMUSG00000097503.2	7.16741	0.101263	0.305253	0.316102	0.695923	3110045C21Rik
ENSMUSG00000026674.9	490.805	1.30734	0.15381	1.72234e-18	4.10711e-16	Ddr2
ENSMUSG00000026670.15	1426.56	0.0765359	0.104492	0.245298	0.624262	Uap1
ENSMUSG00000104266.1	3.29065	0.0473508	0.319918	0.61002	0.885815	RP23-124N16.3
ENSMUSG00000026667.14	2731.29	0.0203783	0.113253	0.76504	0.941884	Uhmk1
ENSMUSG00000073494.5	8.86608	-0.104981	0.281427	0.29208	0.672816	Sh2d1b2
ENSMUSG00000096964.1	11.4549	-0.0283512	0.217779	0.736896	0.933359	Gm6345
ENSMUSG00000102752.1	10.9762	1.04018	0.892301	0.00243666	0.0281954	Gm7694
ENSMUSG00000038473.14	7.88435	0.2781	0.488582	0.0653166	0.29723	Nos1ap
ENSMUSG00000102193.1	2.48927	0.00340432	0.321529	0.969582	0.992992	RP24-212P5.2
ENSMUSG00000038463.8	8.90937	1.42101	0.817784	0.000567215	0.00864976	Olfml2b
ENSMUSG00000026663.6	1425.01	-0.0364581	0.0744418	0.453707	0.805977	Atf6
ENSMUSG00000096547.1	1.50512	-0.0417159	0.37061	0.636824	NA	Gm25235
ENSMUSG00000053925.4	34.0466	-0.10409	0.212385	0.256761	0.636987	Gm9929
ENSMUSG00000026659.13	541.261	0.0701536	0.126405	0.342792	0.72051	Dusp12
ENSMUSG00000096968.1	2.50281	0.0460307	0.329903	0.618761	0.889346	Gm26620
ENSMUSG00000089838.1	3.01368	-0.0501507	0.34264	0.588297	0.878818	Gm2962
ENSMUSG00000026656.15	7.46356	0.0805822	0.29586	0.405838	0.771548	Fcgr2b
ENSMUSG00000104340.1	10.6961	0.225377	0.395722	0.0907666	0.361906	RP24-65D16.4
ENSMUSG00000059498.13	24.9575	-0.00507323	0.189839	0.949725	0.988877	Fcgr3
ENSMUSG00000026649.14	10.6156	0.00234634	0.221547	0.977721	0.99502	1700009P17Rik
ENSMUSG00000058076.12	2413.48	-0.0145728	0.115077	0.832014	0.959376	Sdhc
ENSMUSG00000056569.11	4.47249	0.0021764	0.291038	0.980557	0.995899	Mpz
ENSMUSG00000038370.6	7.91749	0.0712836	0.265358	0.444373	0.800129	Pcp4l1
ENSMUSG00000005677.14	6.98108	-0.235118	0.434769	0.0882891	0.35637	Nr1i3
ENSMUSG00000005674.9	164.451	-0.398643	0.252597	0.00473671	0.0473924	Tomm40l
ENSMUSG00000005681.12	5.63989	0.627164	0.759669	0.01075	0.0870704	Apoa2
ENSMUSG00000058715.11	11.8647	0.128128	0.283311	0.216609	0.590012	Fcer1g
ENSMUSG00000013593.12	5211.65	-0.0319963	0.122582	0.653174	0.903895	Ndufs2
ENSMUSG00000006403.13	77.3904	-0.116238	0.163948	0.178475	0.535326	Adamts4
ENSMUSG00000052423.14	464.005	-0.281043	0.125724	0.00263061	0.0298993	B4galt3
ENSMUSG00000062729.11	600.205	-0.299833	0.162905	0.00499232	0.0495019	Ppox
ENSMUSG00000053483.13	677.926	-0.112277	0.132695	0.154844	0.494781	Usp21
ENSMUSG00000062963.10	1396.29	-0.0941557	0.149388	0.247025	0.625742	Ufc1
ENSMUSG00000103983.1	134.693	-0.0721528	0.1577	0.371264	0.742868	RP23-395H6.2
ENSMUSG00000013973.12	131.275	-0.10518	0.154489	0.207462	0.578615	Dedd
ENSMUSG00000013997.10	625.197	-0.0380683	0.108704	0.568856	0.870754	Nit1
ENSMUSG00000006412.10	331.614	0.0407156	0.119127	0.563435	0.867204	Pfdn2
ENSMUSG00000102929.1	21.9592	-0.104505	0.251838	0.278872	0.659325	RP23-191A19.1
ENSMUSG00000045259.4	23.2308	0.0590704	0.201291	0.486795	0.827434	Klhdc9
ENSMUSG00000006411.12	57.6474	0.0774442	0.189387	0.365192	0.738985	Pvrl4
ENSMUSG00000048865.16	1106.71	-0.0132217	0.113763	0.846447	0.963806	Arhgap30
ENSMUSG00000026641.13	1861.53	0.0552592	0.101897	0.388767	0.75856	Usf1
ENSMUSG00000103711.1	66.9771	0.0197334	0.157552	0.79787	0.949581	Tstd1
ENSMUSG00000038235.4	1448.92	0.270171	0.148062	0.00676163	0.0616197	F11r
ENSMUSG00000091993.2	28.788	0.079582	0.203758	0.363224	0.737911	B930036N10Rik
ENSMUSG00000060244.1	40.7095	0.229289	0.276635	0.056613	0.271919	Alyref2
ENSMUSG00000004709.14	1.8442	0.125576	0.473923	0.193101	NA	Cd244
ENSMUSG00000059058.7	6.38394	-0.0736922	0.301257	0.443673	0.799722	Tma7-ps
ENSMUSG00000015314.10	17.7536	2.02561	0.510071	1.72204e-06	5.80128e-05	Slamf6
ENSMUSG00000026556.15	799.335	-0.00472255	0.139884	0.949297	0.988809	Vangl2
ENSMUSG00000051251.3	4.70294	-0.00225138	0.279008	0.97978	0.99569	Nhlh1
ENSMUSG00000003458.12	1287.71	0.00110555	0.102263	0.986235	0.996627	Ncstn
ENSMUSG00000026553.17	8118.36	-0.0622571	0.0829708	0.245468	0.624363	Copa
ENSMUSG00000102779.1	8.36196	-0.102808	0.298691	0.30769	0.689303	RP23-244J9.1
ENSMUSG00000103380.1	7.3004	-0.165697	0.391719	0.16414	0.511056	RP23-244J9.2
ENSMUSG00000003464.13	1871.02	-0.00287631	0.0956554	0.962531	0.991434	Pex19
ENSMUSG00000089803.3	3.43225	-0.031209	0.321416	0.731323	0.93168	Gm10171
ENSMUSG00000026554.15	3328.77	-0.0240774	0.0726375	0.616892	0.88897	Dcaf8
ENSMUSG00000013698.12	161.083	0.286792	0.255952	0.0228078	0.148887	Pea15a
ENSMUSG00000007122.11	7.00684	-0.0360632	0.256332	0.684477	0.916486	Casq1
ENSMUSG00000092085.1	1.60363	-0.0025662	0.344082	0.976685	NA	Gm17224
ENSMUSG00000007107.6	4.97071	0.115039	0.372517	0.278528	0.658947	Atp1a4
ENSMUSG00000038034.15	609.025	0.142982	0.149591	0.098026	0.380269	Igsf8
ENSMUSG00000007097.14	23.026	2.7492	0.48091	1.41535e-10	1.08941e-08	Atp1a2
ENSMUSG00000038026.12	14.9241	0.627521	0.633179	0.00947922	0.0795868	Kcnj9
ENSMUSG00000044708.5	40.0082	0.353576	0.384701	0.0253725	0.159739	Kcnj10
ENSMUSG00000050229.3	2229.21	-0.134828	0.108617	0.0627828	0.289961	Pigm
ENSMUSG00000102278.1	21.9767	0.70109	0.499303	0.00363162	0.0385057	RP23-157J4.3
ENSMUSG00000103357.1	2.43296	0.0126732	0.347874	0.885171	0.974067	RP24-144H23.4
ENSMUSG00000026548.4	10.3389	0.763785	0.686645	0.0055377	0.0534923	Slamf9
ENSMUSG00000037995.15	124.712	0.766326	0.239862	3.36229e-05	0.000808912	Igsf9
ENSMUSG00000026547.15	1538.22	0.0189172	0.103234	0.769282	0.942924	Tagln2
ENSMUSG00000104351.1	8.97259	-0.00678346	0.280164	0.939205	0.986792	RP24-144H23.5
ENSMUSG00000026546.16	40.4061	0.216427	0.281405	0.068482	0.305687	Cfap45
ENSMUSG00000085184.9	10.4737	0.0603411	0.246955	0.503169	0.836265	4933439K11Rik
ENSMUSG00000049598.9	3.10919	0.0616867	0.350505	0.513286	0.841643	Vsig8
ENSMUSG00000053318.7	1.27359	0.0680984	0.422782	0.417878	NA	Slamf8
ENSMUSG00000026544.6	11.6976	0.0463673	0.234818	0.596189	0.880935	Dusp23
ENSMUSG00000005338.13	1.46817	0.0674888	0.381287	0.467315	NA	Cadm3
ENSMUSG00000037860.15	96.2282	0.11611	0.169369	0.183562	0.542897	Aim2
ENSMUSG00000026532.7	10.8505	1.78516	0.906456	0.00018856	0.0034201	Spta1
ENSMUSG00000028354.13	211.251	0.0506171	0.17583	0.532811	0.85246	Fmn2
ENSMUSG00000050069.3	4.1019	1.24292	1.25903	0.000473949	0.00745658	Grem2
ENSMUSG00000026527.13	10.2098	0.247972	0.41948	0.076702	0.327705	Rgs7
ENSMUSG00000026526.14	2659.12	-0.0354763	0.112878	0.603481	0.88349	Fh1
ENSMUSG00000039783.15	10.9417	0.0304399	0.230048	0.722864	0.929833	Kmo
ENSMUSG00000026525.9	7.152	0.0974521	0.308177	0.332423	0.711503	Opn3
ENSMUSG00000078185.3	1226.53	-0.336643	0.135487	0.000817002	0.0117377	Chml
ENSMUSG00000026523.14	25.5306	0.0149107	0.163091	0.847576	0.964201	Wdr64
ENSMUSG00000039748.11	2538.28	-0.10301	0.122176	0.16823	0.517694	Exo1
ENSMUSG00000094820.1	1.70272	0.0320217	0.363531	0.71517	NA	Gm23805
ENSMUSG00000104158.2	1.88961	0.0183036	0.334078	0.837521	NA	RP24-531A1.1
ENSMUSG00000055214.15	1.62897	0.0910501	0.422002	0.330475	NA	Pld5
ENSMUSG00000078184.1	2.30533	-0.0570691	0.34636	0.542426	0.857802	B020018G12Rik
ENSMUSG00000103471.1	3.0405	0.0237653	0.312662	0.79257	0.947816	RP23-440J24.1
ENSMUSG00000057335.11	1806.65	-0.0200375	0.0834142	0.714782	0.926455	Cep170
ENSMUSG00000103634.1	10.9538	-0.0218589	0.236077	0.799389	0.949618	RP23-440J24.5
ENSMUSG00000104154.1	14.4738	-0.0516419	0.226689	0.553271	0.862862	RP23-440J24.4
ENSMUSG00000103435.1	4.21876	-0.00579528	0.277725	0.947968	0.988288	RP23-440J24.2
ENSMUSG00000065573.1	2.09798	-0.0396653	0.35769	0.658264	0.905745	Mir350
ENSMUSG00000084749.1	2.63998	0.178319	0.462695	0.142041	0.472819	Gm25288
ENSMUSG00000026504.17	185.807	-0.218557	0.182451	0.032962	0.189687	Sdccag8
ENSMUSG00000103367.1	2.22278	0.0848582	0.384843	0.38314	0.753364	RP23-293I7.1
ENSMUSG00000102475.1	2.24755	-0.0679456	0.38194	0.464477	0.812943	RP23-293I7.3
ENSMUSG00000087082.1	2.36765	-0.00636335	0.317185	0.94329	0.987461	Gm15423
ENSMUSG00000103251.1	1.54616	-0.05717	0.382207	0.525263	NA	RP23-293I7.7
ENSMUSG00000019699.16	581.189	0.18901	0.161184	0.0451459	0.235354	Akt3
ENSMUSG00000104391.1	3.19412	0.20365	0.502152	0.10926	0.406289	RP23-268A12.1
ENSMUSG00000102133.1	3.837	0.0839259	0.345956	0.397273	0.764133	RP23-268A12.2
ENSMUSG00000102749.1	3.42338	-0.0486033	0.33812	0.599707	0.882278	RP23-268A12.3
ENSMUSG00000103163.1	4.57855	0.132332	0.374535	0.231011	0.607688	RP23-379C24.1
ENSMUSG00000103646.1	7.71436	-0.0226202	0.25699	0.797062	0.949376	RP23-379C24.2
ENSMUSG00000102427.1	3.56591	0.061843	0.34055	0.514247	0.8424	RP24-501N9.1
ENSMUSG00000063659.11	475.162	-0.0664244	0.100673	0.297072	0.677768	Zbtb18
ENSMUSG00000015962.5	4.22579	0.379205	0.682754	0.029378	0.176697	1700016C15Rik
ENSMUSG00000015961.8	4906.41	0.035838	0.110278	0.594792	0.880799	Adss
ENSMUSG00000089657.1	8.94197	0.0176088	0.233805	0.837041	0.960815	Gm16585
ENSMUSG00000102483.2	2.522	0.0927805	0.393284	0.347528	0.724391	RP23-474A1.1
ENSMUSG00000091476.8	6.05125	-0.013051	0.248845	0.880624	0.972883	Gm16432
ENSMUSG00000104097.1	4.4118	-0.0836326	0.335704	0.398608	0.764972	RP23-243J5.2
ENSMUSG00000026502.13	1662.54	-0.198806	0.12363	0.0195804	0.134459	Desi2
ENSMUSG00000104126.1	2.18381	0.0330121	0.346316	0.713189	0.926082	RP24-252K15.3
ENSMUSG00000086350.1	23.6986	-0.0378427	0.181822	0.639826	0.899081	B230369F24Rik
ENSMUSG00000026500.6	9.27016	-0.28222	0.458181	0.0609538	0.284495	Cox20
ENSMUSG00000039630.10	24699.8	-0.0755502	0.0991934	0.232006	0.608616	Hnrnpu
ENSMUSG00000104279.1	3.31494	0.156306	0.431169	0.178261	0.535122	RP24-252K15.4
ENSMUSG00000026495.8	49.9036	0.305864	0.341215	0.0325971	0.188429	Efcab2
ENSMUSG00000026494.12	18.2364	0.544639	0.499382	0.00980373	0.0814956	Kif26b
ENSMUSG00000055067.15	1292.02	-0.0864307	0.106864	0.200043	0.567747	Smyd3
ENSMUSG00000096474.2	1.16967	-0.03537	0.379054	0.679811	NA	Gm5561
ENSMUSG00000026492.11	274.344	-0.0161423	0.0989116	0.796716	0.949376	Tfb2m
ENSMUSG00000082395.1	9.9586	0.143193	0.344606	0.200125	0.567747	Gm15480
ENSMUSG00000038949.8	691.014	-0.0192299	0.0784278	0.711248	0.925373	Cnst
ENSMUSG00000038936.13	1826.87	-0.117182	0.141552	0.151919	0.489451	Sccpdh
ENSMUSG00000087236.3	10.5229	0.704827	0.653339	0.00675253	0.0616061	Gm1305
ENSMUSG00000026491.13	11834.9	-0.0252962	0.0637357	0.546807	0.860404	Ahctf1
ENSMUSG00000073486.2	6.63904	-0.0505964	0.26839	0.578375	0.874948	Gm10518
ENSMUSG00000104418.1	1.29592	0.135413	0.510478	0.128088	NA	RP23-204N23.1
ENSMUSG00000026490.18	1922.25	-0.106218	0.109506	0.129178	0.446722	Cdc42bpa
ENSMUSG00000102194.1	8.21771	-0.211296	0.426868	0.108546	0.404623	RP23-204N23.3
ENSMUSG00000103636.1	18.3642	-0.125892	0.264923	0.214117	0.587343	RP23-226J18.3
ENSMUSG00000026489.13	123.589	-0.00929557	0.121007	0.894885	0.976779	Adck3
ENSMUSG00000104520.1	3.88457	-0.0499945	0.305036	0.590862	0.879507	RP23-226J18.4
ENSMUSG00000010609.15	296.913	-0.513669	0.205584	0.000264325	0.00455969	Psen2
ENSMUSG00000102923.1	1.41607	0.07171	0.388944	0.440407	NA	RP23-226J18.5
ENSMUSG00000055676.4	2.75191	0.049288	0.331532	0.59591	0.880888	Gm5069
ENSMUSG00000038855.10	115.334	-0.110277	0.190639	0.219333	0.592965	Itpkb
ENSMUSG00000104388.1	4.27956	0.0215115	0.343288	0.808638	0.952186	RP24-74O18.2
ENSMUSG00000103772.1	1.54178	0.129174	0.487413	0.170086	NA	RP24-74O18.4
ENSMUSG00000053963.7	1.39992	0.0774517	0.422267	0.378829	NA	6330403A02Rik
ENSMUSG00000026496.11	18429.8	0.168517	0.1295	0.0440672	0.23119	Parp1
ENSMUSG00000098926.1	7.14147	-0.0499736	0.254224	0.577696	0.87449	Mir6904
ENSMUSG00000058729.13	1013.65	-0.0196397	0.102994	0.76039	0.940741	Lin9
ENSMUSG00000026497.7	10.4363	0.124076	0.297636	0.234637	0.611839	Mixl1
ENSMUSG00000026499.5	1149.24	-0.117966	0.13633	0.142716	0.473766	Acbd3
ENSMUSG00000103649.1	23.4068	0.0966392	0.214989	0.288681	0.669487	RP23-201I6.5
ENSMUSG00000103156.1	7.15271	-0.0150253	0.236924	0.86105	0.967699	RP23-201I6.6
ENSMUSG00000060743.12	4903.88	0.0158999	0.120434	0.821007	0.955981	H3f3a
ENSMUSG00000073485.3	68.0478	-0.287178	0.255575	0.0226133	0.148214	H3f3aos
ENSMUSG00000038806.7	2246.69	-0.0392841	0.0864274	0.483367	0.825569	Sde2
ENSMUSG00000103979.1	68.9362	0.0708844	0.179061	0.395971	0.762826	RP23-172B15.2
ENSMUSG00000066652.5	3118.27	-0.894136	0.172641	2.07402e-08	1.10871e-06	Lefty2
ENSMUSG00000026520.8	1882.42	-0.136791	0.151736	0.112689	0.413958	Pycr2
ENSMUSG00000038793.8	185.926	-1.28277	0.191255	1.86208e-12	1.85621e-10	Lefty1
ENSMUSG00000026519.16	83.2285	-0.318737	0.238871	0.0122271	0.0949549	Tmem63a
ENSMUSG00000085563.2	1.46432	-0.0407473	0.371307	0.643574	NA	2210411M09Rik
ENSMUSG00000038776.13	722.31	-0.564656	0.166175	1.09659e-05	0.000301384	Ephx1
ENSMUSG00000102219.1	1.80134	0.0727065	0.403638	0.422615	NA	RP24-242P4.3
ENSMUSG00000026516.8	4048.59	-0.205491	0.0969023	0.00675855	0.0616148	Nvl
ENSMUSG00000062169.13	1045.61	-0.133727	0.116121	0.0758071	0.325636	Cnih4
ENSMUSG00000038733.14	3492.93	-0.000626973	0.124506	0.992974	0.997856	Wdr26
ENSMUSG00000054135.2	9.88156	-0.101035	0.306975	0.317583	0.696408	A430110L20Rik
ENSMUSG00000081214.3	35.7647	0.0679665	0.197454	0.426272	0.787781	Rpl35a-ps2
ENSMUSG00000103260.1	50.2157	-0.0442951	0.167937	0.578319	0.874948	RP23-292F19.4
ENSMUSG00000047369.17	35.7097	0.295884	0.323477	0.0329274	0.189561	Dnah14
ENSMUSG00000004880.11	6882.58	0.0240872	0.101056	0.704862	0.923089	Lbr
ENSMUSG00000089429.1	1.15457	0.171003	0.540902	0.0924973	NA	Gm26004
ENSMUSG00000022995.16	6499.33	-0.391643	0.108099	1.08016e-05	0.000298215	Enah
ENSMUSG00000103722.1	65.6368	-0.135975	0.276203	0.192233	0.556166	RP23-73N8.4
ENSMUSG00000103317.1	19.5356	-0.0184916	0.214401	0.82487	0.957046	RP23-73N8.3
ENSMUSG00000102950.1	40.8828	0.0075361	0.209318	0.927406	0.984234	RP23-73N8.2
ENSMUSG00000102760.1	40.2654	-0.0252616	0.226919	0.766906	0.942379	RP23-73N8.1
ENSMUSG00000026511.7	2213.46	-0.00267002	0.121919	0.969813	0.992992	Srp9
ENSMUSG00000038633.5	3386.91	0.0671107	0.0961175	0.274032	0.655581	Degs1
ENSMUSG00000047539.9	2036.15	0.0151698	0.0815702	0.778334	0.944598	Fbxo28
ENSMUSG00000073482.2	4.95304	-0.0418151	0.28317	0.646468	0.901867	Gm10517
ENSMUSG00000026510.10	757.841	0.102988	0.118359	0.160342	0.504462	Trp53bp2
ENSMUSG00000026509.15	408.24	0.0256765	0.0940412	0.670537	0.911446	Capn2
ENSMUSG00000102234.1	2.2044	-0.0479821	0.402255	0.564081	0.867539	RP23-67I3.4
ENSMUSG00000104415.1	5.72851	0.120366	0.371782	0.262862	0.642408	RP23-67I3.5
ENSMUSG00000038599.14	4.29368	0.135254	0.385786	0.224166	0.599494	Capn8
ENSMUSG00000104376.1	2.73886	0.501574	0.863778	0.00812214	0.0709347	RP23-191P7.1
ENSMUSG00000043429.7	1.33929	0.076119	0.421059	0.385956	NA	Ccdc185
ENSMUSG00000038576.15	222.969	0.876481	0.237336	8.29058e-06	0.000236959	Susd4
ENSMUSG00000079164.8	3.42685	0.373308	0.703801	0.0265159	0.164623	Tlr5
ENSMUSG00000030768.12	238.103	-0.141867	0.152354	0.102706	0.390818	Disp1
ENSMUSG00000102478.1	8.66221	-0.244434	0.440804	0.0819417	0.341688	RP24-268A16.1
ENSMUSG00000046836.13	1723.24	-0.0818273	0.11402	0.244372	0.623365	Brox
ENSMUSG00000042901.10	817.915	-0.0377641	0.0903624	0.517094	0.843354	Aida
ENSMUSG00000056050.13	2142.83	0.0992266	0.102336	0.133653	0.455492	Mia3
ENSMUSG00000072258.10	425.725	-0.0136669	0.0890224	0.813586	0.953358	Taf1a
ENSMUSG00000104212.1	2.66568	0.0749987	0.367594	0.435692	0.79483	CAAA01187608.3
ENSMUSG00000053461.9	5.62235	0.121744	0.345824	0.256458	0.636987	Hhipl2
ENSMUSG00000104022.1	1.33289	0.156524	0.545874	0.0756077	NA	CAAA01187608.2
ENSMUSG00000103451.1	2.03491	0.194781	0.522882	0.105399	0.397336	RP24-411K2.1
ENSMUSG00000039384.8	195.336	0.732773	0.225007	2.5927e-05	0.000646792	Dusp10
ENSMUSG00000044854.7	9.86519	-0.0286397	0.252605	0.744622	0.936522	1700056E22Rik
ENSMUSG00000039377.7	6.20059	0.0838543	0.307311	0.392975	0.760785	Hlx
ENSMUSG00000026621.13	3.07963	0.124604	0.423921	0.239758	0.617693	2023-03-01
ENSMUSG00000073481.9	2725.61	-0.210457	0.168171	0.0325327	0.188269	2023-03-02
ENSMUSG00000039349.5	688.444	0.0351245	0.118596	0.616585	0.888828	C130074G19Rik
ENSMUSG00000026620.11	280.746	-0.164403	0.142123	0.0584903	0.27778	Mark1
ENSMUSG00000102784.1	6.76071	-0.0247313	0.268021	0.780886	0.945804	RP24-190B16.4
ENSMUSG00000039318.12	1432	-0.242876	0.133433	0.00885435	0.07554	Rab3gap2
ENSMUSG00000103613.1	4.33867	0.0449171	0.299224	0.626183	0.892625	RP23-321A12.2
ENSMUSG00000026618.11	5288.48	0.0143862	0.096095	0.814757	0.953811	Iars2
ENSMUSG00000104368.1	2.42285	-0.0331725	0.32937	0.715044	0.926635	RP24-150H14.2
ENSMUSG00000065581.1	2.48787	0.0520281	0.354954	0.572362	0.872335	Mir194-1
ENSMUSG00000102526.1	37.1774	-0.14617	0.228361	0.143982	0.475762	RP24-150H14.3
ENSMUSG00000026617.16	1806.54	-0.028526	0.106207	0.664324	0.908539	Bpnt1
ENSMUSG00000097261.2	10.8443	0.0544028	0.229391	0.534878	0.853551	4930532G15Rik
ENSMUSG00000026615.14	16295.9	-0.0427032	0.0841075	0.433969	0.793622	Eprs
ENSMUSG00000051295.8	3.79049	-0.0165311	0.294702	0.853905	0.965808	9630028B13Rik
ENSMUSG00000097615.1	13.0203	0.110655	0.261654	0.261419	0.640848	Gm2061
ENSMUSG00000026614.7	99.2163	0.32774	0.233152	0.00998476	0.0826052	Slc30a10
ENSMUSG00000102185.1	9.80148	-0.343459	0.471669	0.0382377	0.209429	RP24-170O7.1
ENSMUSG00000039246.8	461.777	-0.0146676	0.101043	0.817555	0.954898	Lyplal1
ENSMUSG00000103056.1	7.55113	-0.506292	0.666431	0.0182472	0.127648	RP24-275B23.1
ENSMUSG00000039239.14	25.0931	-0.110768	0.234162	0.24562	0.624363	Tgfb2
ENSMUSG00000102619.1	8.62333	-0.0729916	0.264611	0.434288	0.793836	RP24-276N20.3
ENSMUSG00000001305.5	1957.79	-0.0409165	0.13379	0.581454	0.875981	Rrp15
ENSMUSG00000097784.1	17.712	-0.13748	0.256506	0.178775	0.535846	A430105J06Rik
ENSMUSG00000104312.1	13.6902	-0.00132075	0.203119	0.987143	0.996732	RP23-429I18.2
ENSMUSG00000039224.1	199.922	-0.0274021	0.168002	0.727497	0.930158	D1Pas1
ENSMUSG00000026611.17	4.48095	-0.0553076	0.303062	0.554712	0.863504	Spata17
ENSMUSG00000039210.16	1202.34	-0.0140266	0.0717832	0.7702	0.942937	Gpatch2
ENSMUSG00000104394.2	252.651	0.119028	0.126837	0.125584	0.440011	RP23-306B14.3
ENSMUSG00000104245.1	91.3107	-0.119486	0.185629	0.185601	0.545675	RP23-349L18.2
ENSMUSG00000103923.1	1.30873	0.108814	0.457994	0.238536	NA	RP23-349L18.1
ENSMUSG00000026610.13	3.1595	0.594322	0.903049	0.00701806	0.0635282	Esrrg
ENSMUSG00000026609.15	17.1379	1.2918	0.577055	0.000306664	0.00519067	Ush2a
ENSMUSG00000026608.13	1514.85	0.00224166	0.0700722	0.962109	0.991434	Kctd3
ENSMUSG00000037624.15	4.62513	0.125755	0.3624	0.247325	0.62607	Kcnk2
ENSMUSG00000102824.1	142.512	0.0332161	0.14079	0.658679	0.905911	RP23-411B11.2
ENSMUSG00000103087.1	3.14839	0.162488	0.443736	0.166269	0.514722	RP24-511M8.3
ENSMUSG00000026605.14	6301.1	-0.00712102	0.112753	0.916489	0.981324	Cenpf
ENSMUSG00000103374.1	9.83475	-0.0433433	0.243787	0.622976	0.890962	RP24-511M8.2
ENSMUSG00000026604.17	821.216	0.343612	0.275368	0.0129053	0.0991772	Ptpn14
ENSMUSG00000102248.1	1.24251	0.0783223	0.438201	0.347623	NA	RP23-11M24.1
ENSMUSG00000097925.1	13.6261	0.0115269	0.200471	0.887914	0.974934	Gm26574
ENSMUSG00000104435.1	46.6087	-0.119645	0.191885	0.189523	0.55154	RP24-288J3.2
ENSMUSG00000026603.13	364.857	-0.338738	0.150023	0.00139953	0.0181842	Smyd2
ENSMUSG00000103467.1	12.8985	-0.0834085	0.297491	0.392261	0.760572	RP24-288J3.1
ENSMUSG00000010175.13	10.7681	-0.0110257	0.218773	0.895363	0.976895	Prox1
ENSMUSG00000093064.2	2.68184	-0.00586521	0.356161	0.945921	0.988046	Gm23153
ENSMUSG00000089872.10	1015.51	-0.00138508	0.0844534	0.980138	0.995712	Rps6kc1
ENSMUSG00000026634.16	1290.92	0.0455569	0.0804153	0.382704	0.753212	Angel2
ENSMUSG00000037568.12	57.963	1.0648	0.359219	7.38708e-05	0.00155564	Vash2
ENSMUSG00000103723.1	1.29061	0.135345	0.48575	0.168766	NA	RP23-399N18.2
ENSMUSG00000103964.1	3.94976	-0.0112686	0.279927	0.899282	0.977922	RP23-399N18.1
ENSMUSG00000066595.9	556.595	-0.0679446	0.107562	0.310426	0.691232	Mfsd7b
ENSMUSG00000097845.2	3.34146	-0.000859076	0.309422	0.992342	0.997798	A230020J21Rik
ENSMUSG00000057072.11	4.76693	0.271698	0.543546	0.0669317	0.301534	Spata45
ENSMUSG00000026632.17	188.182	-0.0642895	0.124781	0.379464	0.750124	Tatdn3
ENSMUSG00000062510.12	1158.76	-0.216208	0.153765	0.0238647	0.153156	Nsl1
ENSMUSG00000103576.1	23.7364	0.0557866	0.233105	0.527078	0.849351	RP23-399N18.7
ENSMUSG00000026630.9	4.1593	0.0892972	0.324665	0.371451	0.742932	Batf3
ENSMUSG00000026628.13	271.138	0.318568	0.208516	0.00818917	0.0713414	Atf3
ENSMUSG00000073478.6	34.9482	-0.135695	0.211906	0.158517	0.501611	D730003I15Rik
ENSMUSG00000103685.1	1.65535	0.0320964	0.385843	0.701209	NA	RP24-443M8.1
ENSMUSG00000037499.9	182.228	0.00549745	0.114631	0.936034	0.986104	Nenf
ENSMUSG00000026627.7	132.684	0.0279678	0.111836	0.68002	0.914659	Tmem206
ENSMUSG00000026626.11	2152.96	-0.0530692	0.103437	0.412846	0.77764	Ppp2r5a
ENSMUSG00000102246.1	15.8271	-0.0348347	0.248902	0.692195	0.91889	RP24-566B6.4
ENSMUSG00000037474.13	2420.69	-0.143816	0.130309	0.0767901	0.327908	Dtl
ENSMUSG00000037461.10	2048.15	-0.194108	0.112548	0.0163074	0.118491	Ints7
ENSMUSG00000102970.1	15.2127	-0.0432765	0.206248	0.606792	0.885045	RP24-566B6.2
ENSMUSG00000026623.16	1579.1	0.0150077	0.084261	0.786486	0.946887	Lpgat1
ENSMUSG00000064845.1	1.71361	-0.123135	0.471958	0.198413	NA	Gm26203
ENSMUSG00000102840.1	15.1178	-0.0372814	0.204632	0.655085	0.904876	RP23-355E19.1
ENSMUSG00000026622.15	2117.37	-0.0211082	0.0770709	0.679318	0.914258	Nek2
ENSMUSG00000055833.14	12.4711	-0.0423811	0.234901	0.626869	0.89312	1700034H15Rik
ENSMUSG00000037434.7	540.742	-0.156743	0.126372	0.0541575	0.265258	Slc30a1
ENSMUSG00000049353.17	6.25539	0.141452	0.401066	0.209716	0.581685	Rd3
ENSMUSG00000097416.3	12.7756	-0.0903424	0.262983	0.344628	0.722254	Gm26670
ENSMUSG00000026637.13	17.3131	-0.0806202	0.236628	0.378076	0.748838	Traf5
ENSMUSG00000103653.1	7.21622	0.502431	0.679695	0.0185736	0.129237	WI1-1003N17.1
ENSMUSG00000037395.15	205.655	-0.0401017	0.119768	0.570287	0.871404	Rcor3
ENSMUSG00000058248.12	9.35849	0.0698975	0.257246	0.448693	0.802506	Kcnh1
ENSMUSG00000037375.16	77.1493	0.0415276	0.150839	0.5908	0.879507	Hhat
ENSMUSG00000094131.1	1.26186	-0.13203	0.488007	0.167606	NA	Gm22265
ENSMUSG00000047384.3	1.71124	0.00801522	0.357191	0.926086	NA	A730013G03Rik
ENSMUSG00000016262.14	15.5493	0.0211083	0.197279	0.79618	0.949284	Sertad4
ENSMUSG00000102162.1	5.637	0.0937229	0.313169	0.349552	0.725749	RP23-381K21.5
ENSMUSG00000016200.14	1263.75	-0.0311299	0.0904876	0.594475	0.880656	Syt14
ENSMUSG00000089158.1	3.83564	-0.27151	0.563773	0.0641858	0.294253	Gm23583
ENSMUSG00000016181.9	431.173	-0.0138793	0.124277	0.845532	0.963593	Diexf
ENSMUSG00000026638.15	378.643	0.151175	0.135835	0.0709169	0.312481	Irf6
ENSMUSG00000079144.7	282.49	-0.0266911	0.123402	0.708055	0.924028	A130010J15Rik
ENSMUSG00000037318.10	6.30993	0.262764	0.510262	0.0732415	0.318572	Traf3ip3
ENSMUSG00000026639.18	18.5254	1.13311	0.633492	0.000880207	0.0124943	Lamb3
ENSMUSG00000009633.3	49.1581	0.151126	0.242296	0.141017	0.471292	G0s2
ENSMUSG00000104348.1	1.9899	0.0301329	0.339032	0.737802	0.933737	RP23-59N15.4
ENSMUSG00000097850.2	2.09968	-0.0571586	0.36291	0.536527	0.854457	4631405K08Rik
ENSMUSG00000026640.12	166.376	0.224998	0.268891	0.0574267	0.274688	Plxna2
ENSMUSG00000102523.1	2.32198	-0.0219009	0.35555	0.802517	0.950411	RP23-288J11.1
ENSMUSG00000102621.1	1.41878	0.0726107	0.426961	0.390789	NA	RP23-288J11.2
ENSMUSG00000102841.1	1.41245	0.013113	0.364294	0.878235	NA	RP23-288J11.3
ENSMUSG00000016494.9	86.5523	1.42745	0.232531	6.42066e-11	5.17118e-09	Cd34
ENSMUSG00000097325.2	2.65692	0.0065822	0.322988	0.941229	0.987239	Gm16897
ENSMUSG00000096929.7	26.9382	0.0801379	0.211508	0.365283	0.738985	A330023F24Rik
ENSMUSG00000104525.1	10.5523	0.389126	0.538023	0.0314754	0.184749	RP23-445K23.3
ENSMUSG00000103867.1	6.29267	-0.00371651	0.272762	0.966506	0.992773	RP23-445K23.5
ENSMUSG00000016493.13	19.0685	0.0645704	0.205663	0.452891	0.805676	Cd46
ENSMUSG00000104010.1	2.20078	0.392483	0.763037	0.0162651	0.118306	RP23-82P18.3
ENSMUSG00000103443.1	2.90915	0.0188886	0.319722	0.833622	0.959766	RP23-82P18.4
ENSMUSG00000016481.15	776.334	0.0246471	0.106667	0.708329	0.924236	Cr1l
ENSMUSG00000026616.16	15.0502	1.46676	0.616923	0.000187236	0.00340625	Cr2
ENSMUSG00000050530.14	206.065	0.195068	0.223713	0.0676529	0.303043	Fam171a1
ENSMUSG00000026643.16	5588.31	0.0234712	0.0870977	0.679433	0.914258	Nmt2
ENSMUSG00000075837.1	5.92018	-0.0244757	0.256021	0.78086	0.945804	Gm22005
ENSMUSG00000049950.6	323.384	-0.185645	0.156804	0.0458023	0.237335	Rpp38
ENSMUSG00000026644.7	44.4202	0.113214	0.202893	0.217615	0.591204	Acbd7
ENSMUSG00000026650.15	1.52335	0.314268	0.696473	0.0244639	NA	Meig1
ENSMUSG00000026648.18	489.775	-0.0657749	0.118771	0.356263	0.731997	Dclre1c
ENSMUSG00000026646.16	978.013	-0.0750797	0.114632	0.284848	0.665357	Suv39h2
ENSMUSG00000085043.1	15.1065	-0.0819702	0.228212	0.366075	0.738985	Gm13184
ENSMUSG00000109865.1	3668.1	0.0134887	0.11336	0.843097	0.96344	NA
ENSMUSG00000051396.15	294.621	0.0416652	0.107688	0.53078	0.851932	Hspa14
ENSMUSG00000039496.8	11.1682	-0.0906116	0.275468	0.349428	0.725746	Cdnf
ENSMUSG00000026655.15	966.659	0.306547	0.177925	0.00599559	0.0566993	Fam107b
ENSMUSG00000085205.1	2.0495	0.0484336	0.348664	0.598503	0.881887	Gm13185
ENSMUSG00000026657.17	759.638	-0.245924	0.223078	0.0309757	0.18262	Frmd4a
ENSMUSG00000086018.7	2.59358	0.0701902	0.347282	0.465779	0.813711	Gm13179
ENSMUSG00000039449.14	1986.26	-0.00953918	0.0966694	0.877088	0.9724	Prpf18
ENSMUSG00000083378.3	1.96525	0.117017	0.427241	0.25488	0.634995	Gm13196
ENSMUSG00000048186.14	81.2506	-0.0111331	0.129666	0.877844	0.9724	Bend7
ENSMUSG00000026662.13	1903.45	-0.0357235	0.0909378	0.54238	0.857802	Sephs1
ENSMUSG00000026664.7	1190.53	0.0692426	0.105768	0.295704	0.676749	Phyh
ENSMUSG00000086670.1	4.49627	0.154975	0.401202	0.18337	0.542677	Gm13194
ENSMUSG00000082795.1	7.39878	0.0343407	0.262666	0.700058	0.92103	Gm13193
ENSMUSG00000069188.5	5.8148	-0.020704	0.267628	0.815382	0.953977	Gm13192
ENSMUSG00000026668.10	10.3284	0.077982	0.278855	0.413121	0.777736	Ucma
ENSMUSG00000026669.14	3501.63	-0.166348	0.0990439	0.0214179	0.142686	Mcm10
ENSMUSG00000026672.11	375.812	-0.383361	0.183103	0.00146809	0.0188534	Optn
ENSMUSG00000086430.1	5.40006	-0.0630368	0.29884	0.504783	0.836939	4930551O13Rik
ENSMUSG00000026676.7	58.3943	2.50325	0.352781	3.39596e-14	4.39362e-12	Ccdc3
ENSMUSG00000039145.16	907.43	0.35994	0.1908	0.00282714	0.0317472	Camk1d
ENSMUSG00000082013.1	1.477	0.0296715	0.356118	0.737098	NA	Gm13216
ENSMUSG00000039128.13	1767.74	-0.0936634	0.130915	0.222949	0.597337	Cdc123
ENSMUSG00000025817.12	2062.01	-0.0598013	0.118999	0.400434	0.766247	Nudt5
ENSMUSG00000056718.2	49.7278	-0.0690211	0.163753	0.395848	0.762723	Gm13199
ENSMUSG00000025816.15	817.602	-0.0314452	0.0999321	0.618256	0.889334	Sec61a2
ENSMUSG00000085818.7	8.54858	0.0498039	0.248039	0.576423	0.873977	Gm13267
ENSMUSG00000025815.13	1724.23	0.0318843	0.101798	0.617957	0.889334	Dhtkd1
ENSMUSG00000043241.14	1578.92	0.0785197	0.14085	0.315209	0.695088	Upf2
ENSMUSG00000045319.13	204.267	0.399872	0.183712	0.00106824	0.0146052	Proser2
ENSMUSG00000102887.1	2.01838	0.00515832	0.355247	0.952488	0.989824	RP23-413M3.5
ENSMUSG00000039063.5	46.4592	0.341141	0.306652	0.0175524	0.12436	Echdc3
ENSMUSG00000087125.1	1.96528	0.0518182	0.356737	0.573107	0.872581	A230108P19Rik
ENSMUSG00000118578.1	2.82443	-0.121682	0.428083	0.243859	0.623044	NA
ENSMUSG00000039046.15	1345.33	0.0132813	0.0839673	0.810098	0.952759	Usp6nl
ENSMUSG00000085716.1	7.06823	-0.0408212	0.282843	0.653914	0.904267	Gm13388
ENSMUSG00000002107.18	441.596	0.0537539	0.157145	0.496297	0.832501	Celf2
ENSMUSG00000065824.1	23.3978	-0.041612	0.21247	0.623084	0.890962	Gm26315
ENSMUSG00000082953.3	9.5043	-0.475178	0.599051	0.0203315	0.137711	Gm13217
ENSMUSG00000015619.10	14.9118	0.225538	0.352777	0.0812081	0.339736	Gata3
ENSMUSG00000025783.2	1.65302	0.0560009	0.3727	0.538755	NA	4930412O13Rik
ENSMUSG00000075534.5	4.67928	-0.00773332	0.278557	0.930664	0.985329	Gm13262
ENSMUSG00000025782.12	394.111	-0.0148998	0.141746	0.841934	0.962911	Taf3
ENSMUSG00000103570.1	8.33572	-0.0414903	0.259889	0.642892	0.900688	RP23-393G10.4
ENSMUSG00000025781.14	9215.04	-0.0141245	0.123409	0.842375	0.963176	Atp5c1
ENSMUSG00000077733.1	12.7839	0.0356351	0.246174	0.684821	0.916652	Gm23608
ENSMUSG00000037262.7	490.566	-0.142114	0.167199	0.114422	0.416504	Kin
ENSMUSG00000037254.18	1.364	-0.0024085	0.376259	0.976818	NA	Itih2
ENSMUSG00000025780.7	117.21	1.54303	0.248031	3.47789e-11	2.97862e-09	Itih5
ENSMUSG00000086748.1	126.54	-0.539907	0.234281	0.00045194	0.00718928	Gm13261
ENSMUSG00000061186.15	2285.26	0.241291	0.161905	0.0163605	0.118686	Sfmbt2
ENSMUSG00000080500.1	7.40586	0.115263	0.315994	0.269127	0.649403	Gm22072
ENSMUSG00000080627.1	6.63833	0.0703079	0.303719	0.463056	0.811975	Gm22677
ENSMUSG00000092793.1	6.04937	-0.0162527	0.246302	0.851427	0.965422	Mir466m
ENSMUSG00000077972.1	3.53875	0.0734323	0.320257	0.448657	0.802506	Mir466f-1
ENSMUSG00000077038.1	3.77075	0.0142275	0.285215	0.873508	0.971477	Mir669f
ENSMUSG00000080653.1	7.00129	-0.0783268	0.294086	0.416868	0.780612	Mir669e
ENSMUSG00000076126.1	4.64204	0.0648132	0.314966	0.496752	0.832643	Mir669b
ENSMUSG00000077131.1	9.12938	-0.116103	0.29991	0.26054	0.640056	Gm23578
ENSMUSG00000077834.1	6.31433	0.117725	0.327773	0.264671	0.645115	Mir669d
ENSMUSG00000077998.1	3.81105	-0.016872	0.296801	0.851033	0.965314	Mir466f-2
ENSMUSG00000076959.1	2.4921	0.075734	0.356097	0.435328	0.794634	Mir669l
ENSMUSG00000080504.1	4.95646	0.0355314	0.300556	0.69705	0.920132	Mir669d-2
ENSMUSG00000077981.1	6.96164	-0.0439507	0.263581	0.625336	0.89198	Mir466f-3
ENSMUSG00000076983.2	6.86387	0.0568304	0.2596	0.532097	0.852302	Mir297a-2
ENSMUSG00000078026.1	13.4174	0.117149	0.286464	0.251415	0.631275	Mir466o
ENSMUSG00000094165.1	20.4577	-0.00412196	0.191023	0.959207	0.991155	Gm26073
ENSMUSG00000077049.2	7.91772	0.0616346	0.286811	0.510423	0.840328	Mir467c
ENSMUSG00000106608.1	2.06299	0.0178312	0.340261	0.840827	0.962068	NA
ENSMUSG00000076028.1	6.65044	0.1219	0.349035	0.256552	0.636987	Mir669a-3
ENSMUSG00000094297.1	13.9968	0.126705	0.306847	0.230608	0.607241	Mir669k
ENSMUSG00000095843.1	15.9409	-0.00651828	0.202603	0.936595	0.98631	Gm26491
ENSMUSG00000096624.1	6.30196	0.0348707	0.292879	0.701489	0.92158	Mir467a-1
ENSMUSG00000095269.1	2.35129	0.0670824	0.376123	0.472598	0.818468	Mir466b-8
ENSMUSG00000096583.1	7.28996	0.131214	0.339898	0.228593	0.605109	Mir669a-1
ENSMUSG00000080459.1	12.7165	0.0964125	0.256141	0.314085	0.693982	Mir669g
ENSMUSG00000095938.1	9.46985	0.0515631	0.239352	0.559919	0.865929	Gm25701
ENSMUSG00000095340.1	13.117	0.139541	0.290479	0.189816	0.551996	Mir669j
ENSMUSG00000096027.1	6.26479	0.0620816	0.287742	0.507891	0.839062	Mir467a-2
ENSMUSG00000104933.1	8.81644	0.0135338	0.257972	0.877334	0.9724	NA
ENSMUSG00000105546.1	6.38765	0.0300366	0.287675	0.739597	0.934571	NA
ENSMUSG00000095336.1	4.71248	0.082633	0.331145	0.40305	0.768772	Gm24315
ENSMUSG00000094190.1	10.5423	0.0402518	0.236106	0.644125	0.901098	Gm25451
ENSMUSG00000095509.1	7.63346	0.065582	0.282153	0.484643	0.826473	Mir467b
ENSMUSG00000104561.1	10.8949	0.0581469	0.254207	0.521002	0.845386	NA
ENSMUSG00000104734.1	6.94719	-0.0396095	0.271213	0.660576	0.906827	NA
ENSMUSG00000094927.1	3.9602	-0.0957063	0.360077	0.346185	0.72339	Gm24761
ENSMUSG00000080405.1	8.80603	-0.0357234	0.233495	0.679737	0.9145	Gm23651
ENSMUSG00000095786.1	10.2024	-0.0852273	0.257377	0.366101	0.738985	Gm24673
ENSMUSG00000096880.1	7.05129	0.110719	0.327772	0.287833	0.668796	Gm23569
ENSMUSG00000096360.1	1.60893	0.0153123	0.339924	0.862859	NA	Mir466b-7
ENSMUSG00000095222.1	1.78323	0.0816116	0.396541	0.389504	NA	Mir467a-9
ENSMUSG00000076966.2	2.43868	0.0540361	0.336285	0.563598	0.867291	Mir466b-2
ENSMUSG00000105365.1	1.15649	0.0567928	0.419183	0.482424	NA	NA
ENSMUSG00000080649.1	14.8591	-0.0510515	0.224962	0.556708	0.864729	Gm26156
ENSMUSG00000096889.1	23.6475	0.274989	0.346572	0.0465701	0.239832	Gm23571
ENSMUSG00000080476.1	14.2154	0.0780158	0.231487	0.388958	0.758732	Gm25316
ENSMUSG00000093907.1	2.95881	0.43435	0.796183	0.0133178	0.101577	Gm25022
ENSMUSG00000096053.1	3.31967	-0.0384806	0.306111	0.674674	0.912115	Gm25943
ENSMUSG00000106488.1	6.58572	0.0388348	0.267676	0.665685	0.90907	NA
ENSMUSG00000080684.1	15.7299	0.113107	0.247748	0.245308	0.624262	Gm23988
ENSMUSG00000095051.1	10.4292	-0.0731708	0.244254	0.423121	0.785435	Gm25673
ENSMUSG00000094943.1	14.0196	0.115919	0.25691	0.240851	0.618823	Gm25753
ENSMUSG00000076994.2	9.19752	0.0867709	0.274802	0.367091	0.7395	Mir466b-3
ENSMUSG00000105783.1	5.54163	-0.123885	0.355822	0.251811	0.631682	NA
ENSMUSG00000094327.1	17.7919	0.0848665	0.235699	0.355852	0.731771	Gm26398
ENSMUSG00000076948.2	6.18702	-0.0914322	0.302242	0.356302	0.732016	Mir467e
ENSMUSG00000077113.2	8.53142	0.128847	0.317727	0.228488	0.604997	Mir466p
ENSMUSG00000094330.1	15.1211	0.0212929	0.214912	0.79926	0.949618	Gm22051
ENSMUSG00000080624.1	9.0915	0.0273359	0.241793	0.752946	0.938208	Gm22678
ENSMUSG00000077021.2	2.26997	-0.0390805	0.331708	0.66926	0.911038	Mir467d
ENSMUSG00000070099.1	4.72797	0.0411811	0.284687	0.651548	0.903245	Mir466
ENSMUSG00000080558.1	14.609	0.0311389	0.214549	0.71147	0.925488	Gm22091
ENSMUSG00000076976.2	3.89977	0.0381772	0.292054	0.675654	0.912567	Mir297c
ENSMUSG00000076118.1	3.27372	0.041759	0.32467	0.650039	0.902546	Mir669c
ENSMUSG00000077095.1	8.42607	0.113869	0.314025	0.273121	0.654367	Gm24342
ENSMUSG00000077104.1	7.42825	-0.0422478	0.256794	0.63608	0.897694	Gm25263
ENSMUSG00000076014.1	7.78567	0.049615	0.25152	0.579214	0.874948	Mir669a-2
ENSMUSG00000092961.1	6.3146	-0.0485279	0.27245	0.594399	0.880656	Gm22239
ENSMUSG00000092697.1	9.09566	0.487649	0.591288	0.0186921	0.129739	Gm22925
ENSMUSG00000088833.1	7.89345	0.0389245	0.255657	0.66153	0.907028	Gm23542
ENSMUSG00000076222.1	7.01347	0.00346884	0.243063	0.967904	0.992961	Mir297b
ENSMUSG00000078031.1	2.75196	0.0506676	0.340309	0.585272	0.878034	Mir466d
ENSMUSG00000095699.1	7.08071	-0.0267986	0.260484	0.761956	0.941206	Gm26092
ENSMUSG00000089570.1	8.03836	0.0226983	0.236573	0.792065	0.947594	Mir669m-1
ENSMUSG00000088980.1	7.43506	0.259234	0.458342	0.0737815	0.319949	Mir669m-2
ENSMUSG00000077991.1	5.97426	0.386723	0.607424	0.0334006	0.191469	Mir466n
ENSMUSG00000077086.1	3.78648	-0.0262801	0.323603	0.771199	0.943179	Mir669o
ENSMUSG00000078025.1	4.3497	0.112983	0.351156	0.284395	0.665088	Mir466g
ENSMUSG00000077941.1	3.07738	-0.00571513	0.299958	0.949103	0.988694	Mir466h
ENSMUSG00000076956.2	5.26826	-0.00742559	0.283271	0.933576	0.985923	Mir297a-3
ENSMUSG00000078060.1	10.2245	0.141281	0.319687	0.197077	0.563346	Mir466l
ENSMUSG00000077954.1	7.2904	0.0268931	0.253177	0.759563	0.940378	Mir297a-4
ENSMUSG00000080686.1	21.2781	0.121073	0.24077	0.215512	0.589001	Gm24806
ENSMUSG00000080657.1	24.6249	0.103929	0.230453	0.268687	0.648922	Mir669i
ENSMUSG00000080594.1	10.3556	-0.0164933	0.230966	0.846651	0.963807	Mir669h
ENSMUSG00000103237.1	1.78864	0.241534	0.623451	0.0419183	NA	RP23-147F6.5
ENSMUSG00000026778.13	12.8524	0.289269	0.438118	0.0551644	0.267735	Prkcq
ENSMUSG00000082424.4	2.96697	-0.269732	0.592828	0.0578945	0.275998	Gm13292
ENSMUSG00000026773.19	455.437	0.0589295	0.154678	0.456104	0.806706	Pfkfb3
ENSMUSG00000102329.1	2.29438	0.0275056	0.324928	0.761025	0.940961	RP23-428M4.4
ENSMUSG00000102376.1	3.76563	-0.0742295	0.32488	0.444864	0.800441	RP23-307N14.2
ENSMUSG00000037197.11	2723.16	-0.0843978	0.149453	0.294035	0.675064	Rbm17
ENSMUSG00000023206.16	2.17137	0.0433902	0.339162	0.63628	0.897694	Il15ra
ENSMUSG00000058594.15	2815.76	-0.0746793	0.106526	0.263236	0.642977	Fbxo18
ENSMUSG00000047909.11	664.003	-0.239256	0.139969	0.0112617	0.08957	Ankrd16
ENSMUSG00000026768.10	34.4457	0.667603	0.453011	0.00328751	0.0357932	Itga8
ENSMUSG00000026767.12	1341.15	0.0247623	0.091583	0.675419	0.912567	Fam188a
ENSMUSG00000102630.1	5.30017	0.0218163	0.260652	0.804673	0.951058	RP23-232K16.3
ENSMUSG00000104449.1	19.7976	0.0198727	0.208269	0.810608	0.952892	RP23-232K16.2
ENSMUSG00000104406.1	11.1809	-0.00872603	0.228839	0.918105	0.981973	RP23-232K16.4
ENSMUSG00000026730.12	355.094	-0.290749	0.176969	0.00800313	0.0701225	Pter
ENSMUSG00000049630.6	6.37753	-0.0915649	0.326873	0.361852	0.736883	C1ql3
ENSMUSG00000104459.1	6.98858	-0.133232	0.3634	0.227783	0.604209	RP23-415C3.6
ENSMUSG00000102900.1	1.57034	0.172885	0.509528	0.123733	NA	RP23-415C3.5
ENSMUSG00000103599.1	2.16542	-0.0672421	0.382702	0.467692	0.81476	RP23-415C3.7
ENSMUSG00000026727.10	573.545	-0.240463	0.138251	0.0105361	0.0858233	Rsu1
ENSMUSG00000103360.1	3.70113	0.0224067	0.326731	0.803253	0.950747	RP23-415C3.9
ENSMUSG00000102691.1	6.24467	0.0198523	0.273356	0.823491	0.95665	RP23-415C3.8
ENSMUSG00000103232.1	6.28222	-0.134963	0.356416	0.222401	0.596829	RP23-336A16.3
ENSMUSG00000086358.2	11.3287	-0.0067047	0.215055	0.935884	0.986104	Gm13270
ENSMUSG00000026726.10	6.32489	-0.255173	0.496015	0.0776386	0.330657	Cubn
ENSMUSG00000026723.10	197.1	0.00436147	0.130309	0.952032	0.989801	Trdmt1
ENSMUSG00000026728.9	2197.08	-0.872263	0.152602	1.21841e-09	8.03129e-08	Vim
ENSMUSG00000003418.11	247.318	-0.0286338	0.118696	0.68259	0.915651	St8sia6
ENSMUSG00000104354.1	1.40306	-0.0171348	0.366776	0.841133	NA	RP23-185P20.4
ENSMUSG00000063275.15	229.719	-0.0550695	0.146093	0.476769	0.820871	Ptpla
ENSMUSG00000102553.1	13.6248	-0.204665	0.336991	0.0975893	0.37918	RP23-334M9.3
ENSMUSG00000103926.1	4.64431	0.14305	0.399219	0.206535	0.577154	RP23-334M9.5
ENSMUSG00000086657.2	25.3413	-0.122713	0.233922	0.206628	0.577215	Stamos
ENSMUSG00000026718.17	3133.11	0.0369241	0.0844706	0.501742	0.83531	Stam
ENSMUSG00000103901.1	68.4554	0.00480909	0.150834	0.949459	0.988812	RP23-211O3.4
ENSMUSG00000061531.8	2.72393	0.259702	0.57673	0.0643706	0.294673	Tmem236
ENSMUSG00000026712.3	42.529	-0.0296442	0.159146	0.702732	0.922028	Mrc1
ENSMUSG00000103475.1	1.61574	-0.0437632	0.376962	0.617931	NA	RP23-201A19.2
ENSMUSG00000057914.15	7.71329	0.0956997	0.287497	0.332209	0.711233	Cacnb2
ENSMUSG00000070271.7	2.14229	-0.0564824	0.370295	0.537124	0.854837	Gm13268
ENSMUSG00000026707.15	337.45	-0.157565	0.129098	0.0557427	0.269334	Nsun6
ENSMUSG00000103778.1	9.0644	-0.133163	0.366081	0.228269	0.604836	RP23-303M15.7
ENSMUSG00000017418.14	4335.85	0.942712	0.0999002	7.88619e-22	2.86292e-19	Arl5b
ENSMUSG00000102258.1	66.1855	0.208779	0.291505	0.0789763	0.334221	RP23-379F6.3
ENSMUSG00000075520.5	6.44643	0.0656514	0.309236	0.491018	0.828858	Malrd1
ENSMUSG00000103865.1	14.6198	2.40379	0.686136	3.47412e-06	0.000108893	RP23-131N18.1
ENSMUSG00000026748.13	204.486	0.654845	0.175169	3.66145e-06	0.000114176	Plxdc2
ENSMUSG00000053702.16	13.3076	0.178112	0.347087	0.135109	0.458298	Nebl
ENSMUSG00000054057.2	316.273	-0.140833	0.130634	0.0823161	0.342614	A930004D18Rik
ENSMUSG00000085319.1	4.9284	0.106645	0.342026	0.304845	0.686551	Gm13330
ENSMUSG00000054074.9	351.84	0.25987	0.152742	0.00941061	0.0792022	Skida1
ENSMUSG00000086340.1	5.67052	-0.00173997	0.269755	0.984281	0.996627	1810059C17Rik
ENSMUSG00000026743.16	2436.06	-0.0176244	0.0862261	0.754807	0.939033	Mllt10
ENSMUSG00000099050.1	6.46642	-0.115325	0.357166	0.277461	0.658659	Mir7655
ENSMUSG00000092814.1	2.13473	0.165084	0.489417	0.143068	0.474066	Gm23638
ENSMUSG00000064964.1	1.39123	-0.056129	0.419294	0.486029	NA	Gm25147
ENSMUSG00000081619.1	3.00444	-0.0201167	0.312301	0.823371	0.95665	Gm13351
ENSMUSG00000026740.12	653.807	0.0169106	0.0832202	0.757591	0.939819	Dnajc1
ENSMUSG00000082520.2	3.10949	-0.0612088	0.315265	0.518561	0.844052	Gm13349
ENSMUSG00000051154.11	759.817	-0.145951	0.141864	0.085277	0.349544	Commd3
ENSMUSG00000026739.13	583.133	-0.0697769	0.116892	0.324445	0.702471	Bmi1
ENSMUSG00000037708.16	3.24806	-0.0238981	0.306556	0.79147	0.947528	BC061194
ENSMUSG00000026737.12	199.506	0.147232	0.1677	0.104657	0.395645	Pip4k2a
ENSMUSG00000026736.2	2.81306	-0.104469	0.392915	0.30745	0.689208	4930426L09Rik
ENSMUSG00000037683.14	6.20016	0.0264711	0.267615	0.766093	0.942019	Armc3
ENSMUSG00000023094.14	322.273	-0.0716375	0.134134	0.346617	0.723484	Msrb2
ENSMUSG00000056329.3	1.22533	-0.0338037	0.375043	0.694873	NA	1810010K12Rik
ENSMUSG00000043415.5	251.883	0.0939574	0.12606	0.212674	0.585382	Otud1
ENSMUSG00000036617.17	2741.91	-0.0608769	0.149318	0.437344	0.796072	Etl4
ENSMUSG00000082164.1	8.38496	1.11414	0.806956	0.00170889	0.0213265	Gm13360
ENSMUSG00000081128.1	2.03284	-0.0453556	0.345258	0.620869	0.890045	Gm13328
ENSMUSG00000085477.7	4.69661	0.524721	0.760354	0.0153792	0.113664	Gm13335
ENSMUSG00000098575.1	1.94946	-0.0241541	0.369417	0.778226	0.944597	Gm27446
ENSMUSG00000086418.1	5.73765	0.0579542	0.280306	0.532075	0.852302	Gm13362
ENSMUSG00000036591.16	2028.47	-0.0330957	0.137901	0.657621	0.905635	Arhgap21
ENSMUSG00000085206.1	4.3619	0.0750982	0.329725	0.440611	0.798143	Gm13380
ENSMUSG00000075514.4	35.5527	-0.0606727	0.175657	0.459605	0.809308	Gm13375
ENSMUSG00000026679.3	2.96619	0.0489717	0.353031	0.593485	0.88028	Enkur
ENSMUSG00000048550.17	587.877	0.0609568	0.106631	0.35848	0.733405	Thnsl1
ENSMUSG00000081467.1	2.34777	-0.0015467	0.317381	0.986194	0.996627	Gm13337
ENSMUSG00000025716.14	1.25251	-0.0842978	0.425351	0.348993	NA	Myo3a
ENSMUSG00000083863.1	2.48111	-0.0988868	0.412775	0.314122	0.693982	Gm13341
ENSMUSG00000083563.1	21.1215	-0.387008	0.43	0.0233085	0.15111	Gm13340
ENSMUSG00000026787.3	3.19155	0.586967	0.959915	0.00350311	0.0375523	Gad2
ENSMUSG00000069136.4	3.6754	-0.168902	0.455949	0.154673	0.494772	A130006I12Rik
ENSMUSG00000026784.14	560.797	-0.0732226	0.0978485	0.240858	0.618823	Pdss1
ENSMUSG00000084625.1	4.32101	-0.0802445	0.333425	0.414755	0.778993	Gm25544
ENSMUSG00000081861.1	9.4548	0.00878092	0.255202	0.919921	0.982431	Gm14441
ENSMUSG00000058835.14	2328.54	-0.00624512	0.0976078	0.919899	0.982431	Abi1
ENSMUSG00000083650.1	9.70388	-0.0179796	0.231831	0.833297	0.959719	Gm13357
ENSMUSG00000026781.17	1149.7	-0.031678	0.0964538	0.606388	0.884986	Acbd5
ENSMUSG00000026779.6	2256.3	-0.135456	0.123101	0.0825877	0.343168	Mastl
ENSMUSG00000026775.9	10776.2	-0.0233856	0.109702	0.727061	0.930158	Yme1l1
ENSMUSG00000081648.1	10.1725	-0.153253	0.323565	0.171879	0.524214	Gm13423
ENSMUSG00000026774.11	7.84595	0.126069	0.320317	0.23722	0.614369	4931423N10Rik
ENSMUSG00000084098.1	3.39971	0.180368	0.461729	0.140042	0.468857	Gm13422
ENSMUSG00000102704.1	8.93872	0.0039374	0.232408	0.963128	0.991596	RP23-183O12.1
ENSMUSG00000026771.14	899.742	0.0440029	0.106049	0.503876	0.836387	Spopl
ENSMUSG00000026986.14	3.26354	1.65072	1.3717	0.000117665	0.00230247	Hnmt
ENSMUSG00000083116.1	49.2837	-0.0499266	0.169518	0.534241	0.853442	Gm13410
ENSMUSG00000026979.16	91.0235	0.815294	0.27116	6.27821e-05	0.00137448	Psd4
ENSMUSG00000026976.15	12.5973	-0.0297162	0.220571	0.725929	0.930017	Pax8
ENSMUSG00000004113.18	59.7258	0.896746	0.297116	6.41984e-05	0.00140042	Cacna1b
ENSMUSG00000036893.17	1524.37	-0.0129056	0.0935852	0.830338	0.95908	Ehmt1
ENSMUSG00000103162.1	14.9193	-0.0979423	0.281958	0.320372	0.699152	RP23-358I10.3
ENSMUSG00000102875.1	22.7359	0.00930034	0.19059	0.908145	0.979572	RP23-358I10.4
ENSMUSG00000026972.15	225.797	-0.159343	0.145778	0.0679246	0.303996	Arrdc1
ENSMUSG00000026974.11	1468.26	-0.0101305	0.0696166	0.828481	0.958665	Zmynd19
ENSMUSG00000026975.10	631.82	0.00294628	0.0978696	0.962232	0.991434	Dph7
ENSMUSG00000036850.4	307.96	-0.125252	0.155966	0.144722	0.477039	Mrpl41
ENSMUSG00000036833.16	221.04	0.0698211	0.141767	0.368801	0.740616	Pnpla7
ENSMUSG00000084383.1	1.22354	-0.0210848	0.3934	0.791907	NA	Gm13370
ENSMUSG00000006476.19	99.3314	0.00438327	0.122513	0.950573	0.98921	Nsmf
ENSMUSG00000036805.13	3.54525	0.201973	0.506213	0.109033	0.405754	Noxa1
ENSMUSG00000087028.7	2.0685	0.212435	0.539456	0.0904839	0.361445	Gm13387
ENSMUSG00000078202.3	39.2271	0.256518	0.268371	0.037702	0.207519	Nrarp
ENSMUSG00000059555.6	262.507	-0.0459968	0.10562	0.483716	0.825968	Tor4a
ENSMUSG00000013465.19	1950.26	0.0304342	0.0887552	0.596979	0.881099	Nelfb
ENSMUSG00000064919.1	11.2897	-0.0249672	0.213831	0.765679	0.941999	Gm22572
ENSMUSG00000036770.11	15.3517	0.0359963	0.207383	0.667089	0.909686	4933433C11Rik
ENSMUSG00000026969.3	63.8128	0.0397892	0.146992	0.603213	0.883192	Fam166a
ENSMUSG00000036752.4	13066.5	-0.0413715	0.130225	0.573297	0.872601	Tubb4b
ENSMUSG00000006469.13	19.0581	-0.0530818	0.198407	0.527576	0.849676	Slc34a3
ENSMUSG00000089953.3	14.5671	-0.0270727	0.205982	0.744267	0.936522	Rnf224
ENSMUSG00000036731.7	10.904	-0.0117613	0.238214	0.891067	0.975753	Cysrt1
ENSMUSG00000044628.5	60.3713	-0.272688	0.252045	0.026808	0.16579	Rnf208
ENSMUSG00000006471.18	196.769	-0.112272	0.15937	0.187167	0.547762	Ndor1
ENSMUSG00000078201.5	65.3529	-0.0947784	0.177885	0.270802	0.65144	Tmem203
ENSMUSG00000048707.9	414.919	-0.818329	0.167203	6.22235e-08	2.92174e-06	Tprn
ENSMUSG00000026966.6	795.087	-0.401223	0.215367	0.00234987	0.0275189	Ssna1
ENSMUSG00000026965.12	814.246	-0.0095743	0.214994	0.908588	0.979678	Anapc2
ENSMUSG00000026963.4	6.00736	-0.576483	0.743798	0.0131945	0.100826	Tmem210
ENSMUSG00000026961.6	12.108	-0.213771	0.386879	0.100124	0.385215	Lrrc26
ENSMUSG00000026959.13	386.852	-1.83309	0.144494	5.45566e-38	8.84654e-35	Grin1
ENSMUSG00000085830.1	14.0086	-1.19802	0.688253	0.000862718	0.0122928	Grin1os
ENSMUSG00000036646.13	2827.89	-0.268944	0.128847	0.00406384	0.0420616	Man1b1
ENSMUSG00000088171.1	3.33568	-0.0611291	0.357234	0.514652	0.842543	Gm25220
ENSMUSG00000026958.13	1652.63	-0.0589481	0.111872	0.389543	0.759142	Dpp7
ENSMUSG00000026956.15	2757.84	-0.122626	0.113574	0.0938615	0.369895	Uap1l1
ENSMUSG00000026955.13	672.528	-0.00438589	0.0962211	0.943131	0.987461	Sapcd2
ENSMUSG00000015085.8	24.4704	0.0870989	0.224828	0.33834	0.716742	Entpd2
ENSMUSG00000015094.16	129.702	-0.0866308	0.188504	0.316591	0.696049	Npdc1
ENSMUSG00000036587.13	2.98504	0.0192964	0.322712	0.829971	0.95908	Fut7
ENSMUSG00000026944.18	696.47	0.076897	0.146205	0.331247	0.7098	Abca2
ENSMUSG00000047617.11	52.8532	-0.1181	0.207066	0.204414	0.574063	BC029214
ENSMUSG00000015093.15	18.8713	-0.0133561	0.205301	0.871204	0.970976	Clic3
ENSMUSG00000015090.13	15.4984	0.173483	0.317605	0.133046	0.454442	Ptgds
ENSMUSG00000015083.11	73.9009	-0.00257356	0.139529	0.97233	0.993941	C8g
ENSMUSG00000015095.12	646.997	0.046219	0.0945731	0.444425	0.800129	Fbxw5
ENSMUSG00000026942.13	521.409	-0.098854	0.11903	0.177467	0.534026	Traf2
ENSMUSG00000083043.1	7.3862	-0.0572457	0.300306	0.541587	0.857419	Gm13433
ENSMUSG00000015092.9	1598.24	-0.0923484	0.131681	0.230231	0.606722	Edf1
ENSMUSG00000026941.16	193.224	-0.0286467	0.112123	0.673196	0.91199	Mamdc4
ENSMUSG00000036504.6	22.469	-0.119206	0.256995	0.230255	0.606722	Phpt1
ENSMUSG00000029419.8	19.0448	0.0458562	0.211556	0.589124	0.878956	Gm996
ENSMUSG00000015087.14	1972.3	-0.0211011	0.0835276	0.700559	0.92103	Rabl6
ENSMUSG00000052403.11	3.69626	-0.0482127	0.349523	0.599773	0.882278	Fcnaos
ENSMUSG00000026940.3	5.4063	-0.0179482	0.277544	0.84045	0.962039	Ccdc183
ENSMUSG00000026939.12	69.1049	0.25218	0.275836	0.0418787	0.223577	Tmem141
ENSMUSG00000026938.10	4.79678	0.16494	0.409662	0.166383	0.514813	Fcna
ENSMUSG00000087612.1	2.59802	0.121086	0.426449	0.246157	0.624847	A230005M16Rik
ENSMUSG00000049086.8	22.1032	-0.0694361	0.234767	0.439769	0.797651	Bmyc
ENSMUSG00000059625.6	4.0936	0.799045	1.01645	0.00329609	0.0358385	Sohlh1
ENSMUSG00000058740.14	47.5692	1.96591	0.344956	6.01371e-10	4.22897e-08	Kcnt1
ENSMUSG00000026933.17	1705.67	0.00464891	0.0927339	0.938091	0.986663	Camsap1
ENSMUSG00000082357.1	4.03744	0.0897813	0.348623	0.371139	0.742868	Gm13542
ENSMUSG00000036352.16	1698.68	-0.0180832	0.0921995	0.761266	0.941011	Ubac1
ENSMUSG00000026932.14	120.674	0.0666569	0.134268	0.379269	0.750095	Nacc2
ENSMUSG00000087679.2	363.898	-0.0988572	0.114786	0.167691	0.516885	C330006A16Rik
ENSMUSG00000087595.1	11.4761	-0.07742	0.24946	0.402264	0.767803	1810012K08Rik
ENSMUSG00000098977.1	2.04525	0.242827	0.594685	0.0591567	0.279491	Gm27196
ENSMUSG00000036327.18	1746.67	0.151874	0.123633	0.0575094	0.27497	Qsox2
ENSMUSG00000048038.8	6.62986	-0.0569833	0.257482	0.530196	0.851556	4932418E24Rik
ENSMUSG00000026930.15	156.699	0.0441319	0.111825	0.516997	0.843342	Gpsm1
ENSMUSG00000075467.4	314.034	-0.0276695	0.11728	0.690862	0.918393	Dnlz
ENSMUSG00000026928.14	31.0548	-0.0185964	0.172244	0.813336	0.953358	Card9
ENSMUSG00000086779.1	61.1368	-0.0203294	0.137671	0.784018	0.94624	Gm13562
ENSMUSG00000036281.13	1415.08	-0.00357503	0.0744649	0.942878	0.987389	Snapc4
[truncated: 24,373 more rows]

## Sheet: DE gene Dux induced
# Supplementary Table 2
# Gene expression in mESCs Dux induced versus non induced
	baseMean	log2FoldChange	lfcSE	pvalue	padj	symbol
ENSMUSG00000025902.13	10.8973	3.2534	0.93601	5.74292e-05	0.000234121	Sox17
ENSMUSG00000103922.1	152.27	-0.517084	0.213942	0.0133121	0.0338402	RP23-34E15.4
ENSMUSG00000033845.13	1277.01	0.370443	0.080438	3.83051e-06	1.85049e-05	Mrpl15
ENSMUSG00000102275.1	7.60612	0.0873163	0.709223	0.864824	0.920023	RP23-34E15.5
ENSMUSG00000025903.14	869.5	-0.887671	0.107014	6.51047e-17	8.44881e-16	Lypla1
ENSMUSG00000033813.15	1981.79	-0.296855	0.0708569	2.61129e-05	0.000112432	Tcea1
ENSMUSG00000062588.4	25.4885	0.165126	0.466186	0.692924	0.805815	Gm6104
ENSMUSG00000002459.17	2.12484	-0.154507	0.897643	0.729825	NA	Rgs20
ENSMUSG00000033793.12	996.511	0.346567	0.0898649	0.000107559	0.00041692	Atp6v1h
ENSMUSG00000104046.1	3.73342	1.3214	1.34369	0.0573794	0.120596	RP23-267J18.1
ENSMUSG00000025905.14	3.22334	-0.158671	0.843489	0.74351	0.841098	Oprk1
ENSMUSG00000025907.14	1063.32	0.0793774	0.100024	0.425526	0.580242	Rb1cc1
ENSMUSG00000090031.2	52.342	0.411068	0.352521	0.212016	0.348349	4732440D04Rik
ENSMUSG00000102135.1	2.9733	-0.408991	0.927654	0.41675	NA	RP23-5K7.4
ENSMUSG00000051285.17	1130.24	-0.71942	0.0929786	7.66159e-15	8.80584e-14	Pcmtd1
ENSMUSG00000098201.1	2.44319	-0.428372	0.99667	0.33317	NA	Gm26983
ENSMUSG00000103509.1	143.363	-1.48841	0.251025	1.11237e-09	8.17464e-09	WI1-817D1.2
ENSMUSG00000048538.7	38.307	-0.28364	0.394587	0.434974	0.589517	Gm9826
ENSMUSG00000097797.6	17.3007	-1.54402	0.715459	0.00916866	0.0242795	Gm26901
ENSMUSG00000103067.1	19.451	-0.719078	0.576288	0.135578	0.24585	RP24-181G14.2
ENSMUSG00000025909.16	9.40754	-0.920493	0.840656	0.119844	0.222263	Sntg1
ENSMUSG00000084353.1	32.3983	0.746396	0.429889	0.0547579	0.116037	Gm15452
ENSMUSG00000061024.8	1126.28	0.41004	0.0856729	1.55695e-06	7.88062e-06	Rrs1
ENSMUSG00000025911.14	22.2144	0.0529908	0.492848	0.904439	0.943947	Adhfe1
ENSMUSG00000081441.3	33.6194	-0.511984	0.428498	0.187775	0.317032	Gm6161
ENSMUSG00000025912.16	485.121	0.0607936	0.125762	0.626928	0.754156	Mybl1
ENSMUSG00000045210.8	1060.43	0.2543	0.0893365	0.00428747	0.0122976	Vcpip1
ENSMUSG00000097893.8	2.93359	-0.637979	1.06714	0.214928	NA	1700034P13Rik
ENSMUSG00000025915.14	538.157	0.557249	0.11546	1.17197e-06	6.04072e-06	Sgk3
ENSMUSG00000046101.16	22.324	-0.338603	0.499895	0.43778	0.59245	Mcmdc2
ENSMUSG00000098234.7	723.192	-0.341212	0.104215	0.000992721	0.0032594	Snhg6
ENSMUSG00000093178.1	8.78361	-0.120198	0.671211	0.811051	0.886021	Snord87
ENSMUSG00000099032.2	43.1879	-0.425516	0.388602	0.233953	0.376799	Tcf24
ENSMUSG00000025917.9	854.367	-0.534342	0.101779	1.26744e-07	7.33798e-07	Cops5
ENSMUSG00000056763.16	679.726	-0.0812165	0.112719	0.468068	0.620075	Cspp1
ENSMUSG00000067851.11	1008.45	0.323551	0.0913507	0.000374006	0.00132265	Arfgef1
ENSMUSG00000102556.1	3.68106	0.894717	1.11501	0.127025	0.233062	RP24-327F2.1
ENSMUSG00000100212.1	2.87969	0.116312	0.855554	0.808925	NA	Gm5522
ENSMUSG00000048960.13	2498.79	2.85817	0.075046	0	0	Prex2
ENSMUSG00000057715.13	52.5238	-1.8324	0.429558	5.92834e-06	2.78961e-05	A830018L16Rik
ENSMUSG00000016918.15	51.0054	-1.23219	0.394686	0.000819484	0.00273693	Sulf1
ENSMUSG00000025938.16	14.4923	-1.33465	0.759797	0.0258187	0.0607456	Slco5a1
ENSMUSG00000099498.1	3.71517	0.0208313	0.816477	0.967669	0.980096	Gm29283
ENSMUSG00000042414.7	87.9425	-0.0725513	0.270811	0.780252	0.865406	Prdm14
ENSMUSG00000005886.14	580.494	0.337513	0.11346	0.00275945	0.00829118	Ncoa2
ENSMUSG00000103085.1	6.97305	-0.106913	0.708972	0.832456	0.898197	RP23-125I14.2
ENSMUSG00000102664.1	3.69844	0.187491	0.819678	0.709594	0.81712	RP23-125I14.1
ENSMUSG00000025935.10	1248.12	0.0480061	0.0817081	0.55605	0.697435	Tram1
ENSMUSG00000025937.6	1335.19	0.136545	0.0803055	0.0881392	0.172482	Lactb2
ENSMUSG00000102982.1	62.1392	1.34809	0.334273	2.01719e-05	8.81629e-05	RP23-70F22.2
ENSMUSG00000067813.3	8.15283	1.20638	0.899843	0.0530827	0.113034	Xkr9
ENSMUSG00000025932.14	82.2871	-2.01537	0.34499	1.34661e-09	9.78484e-09	Eya1
ENSMUSG00000054493.2	2.07897	-0.436656	0.998348	0.351246	NA	Gm9947
ENSMUSG00000025930.6	65.99	-2.29383	0.405886	3.75819e-09	2.61313e-08	Msc
ENSMUSG00000103492.1	2.60225	-0.151449	0.887733	0.733632	NA	RP23-398C14.1
ENSMUSG00000081201.1	94.8365	-0.74795	0.274751	0.0046773	0.0133037	Smt3h2-ps4
ENSMUSG00000082193.1	482.25	-0.0347795	0.122446	0.774131	0.861633	Rpl5-ps1
ENSMUSG00000032769.5	12.3495	0.448115	0.618284	0.368504	0.525591	Trpa1
ENSMUSG00000073737.3	3.18231	-0.0752046	0.838495	0.873344	0.924826	Gm10566
ENSMUSG00000025925.14	1839.96	-0.611882	0.073343	5.80312e-17	7.57137e-16	Terf1
ENSMUSG00000104379.1	15.7549	-0.235145	0.562978	0.61596	0.746089	RP23-325F17.4
ENSMUSG00000032719.4	6.98009	-0.792543	0.872528	0.178269	0.304589	Sbspon
ENSMUSG00000043716.13	19938.7	-0.0127628	0.0446414	0.77982	0.865261	Rpl7
ENSMUSG00000025921.7	76.1771	-0.19165	0.29015	0.489405	0.639519	Rdh10
ENSMUSG00000025920.19	52.6084	-1.0138	0.375184	0.00373565	0.0108838	Stau2
ENSMUSG00000025939.19	786.187	2.05594	0.10538	1.65006e-85	1.04276e-83	Ube2w
ENSMUSG00000102457.1	401.812	8.51839	0.517263	6.59628e-60	2.87583e-58	RP23-382H8.2
ENSMUSG00000079658.9	1261.33	1.16779	0.0822605	4.88159e-46	1.66446e-44	Tceb1
ENSMUSG00000025940.6	221.547	0.56799	0.173463	0.000879002	0.00291912	Tmem70
ENSMUSG00000025779.10	3.96652	0.00699357	0.808722	0.99034	0.993791	Ly96
ENSMUSG00000091020.3	6.37495	0.153123	0.723986	0.767816	0.858038	Gm5828
ENSMUSG00000101640.1	195.462	12.6044	3.09403	1.72251e-16	2.17144e-15	Gm28376
ENSMUSG00000042686.5	40.1311	0.804739	0.393284	0.0263727	0.061899	Jph1
ENSMUSG00000025777.8	3.21069	-0.150831	0.840708	0.755576	0.849695	Gdap1
ENSMUSG00000100398.1	3.40221	-0.132925	0.837646	0.781494	0.86604	Gm5251
ENSMUSG00000101589.1	6.89747	-0.0378873	0.713429	0.938548	0.963528	Rbm6-ps1
ENSMUSG00000102048.1	4.44779	0.429611	0.847654	0.410682	0.566085	Gm6075
ENSMUSG00000025776.13	9.14398	-0.406854	0.719399	0.435796	0.590383	Crispld1
ENSMUSG00000089787.2	3.48966	-0.855715	1.16795	0.143813	0.25732	Gm15825
ENSMUSG00000100720.1	32.8416	-0.211852	0.417729	0.577938	0.715041	AC098736.2
ENSMUSG00000043760.16	19.0338	0.0677976	0.511851	0.87976	0.928906	Pkhd1
ENSMUSG00000041872.9	22.9715	-0.122126	0.48396	0.772436	0.860801	Il17f
ENSMUSG00000041859.10	4360.1	-0.467037	0.0547038	1.225e-17	1.65849e-16	Mcm3
ENSMUSG00000025931.15	46.8637	-0.883946	0.390727	0.0144061	0.0362649	Paqr8
ENSMUSG00000041809.5	52.7026	-0.177817	0.343004	0.580686	0.717389	Efhc1
ENSMUSG00000041779.5	178.13	-0.00171763	0.19992	0.991946	0.99456	Tram2
ENSMUSG00000100819.1	2.52569	0.0595802	0.859451	0.89951	NA	Gm2693
ENSMUSG00000025933.15	32.6109	-1.78135	0.540899	0.000256016	0.000931889	Tmem14a
ENSMUSG00000025934.15	162.176	-0.880106	0.217656	3.32555e-05	0.0001408	Gsta3
ENSMUSG00000099343.1	7.01892	0.0629266	0.705203	0.903589	0.943482	Gm28836
ENSMUSG00000082935.3	32.7137	-0.229601	0.41897	0.546683	0.690097	Gm7658
ENSMUSG00000041670.17	57.279	-1.0678	0.379555	0.0024079	0.00731532	Rims1
ENSMUSG00000097970.1	2.9436	-0.0726356	0.843422	0.877742	NA	Gm27028
ENSMUSG00000026158.11	107.712	0.651692	0.248225	0.00658328	0.0180552	Ogfrl1
ENSMUSG00000026156.8	18.4812	-0.487403	0.550145	0.296843	0.449014	B3gat2
ENSMUSG00000026155.13	194.155	0.183357	0.187907	0.321269	0.476452	Smap1
ENSMUSG00000026154.4	70.5224	-0.29477	0.301679	0.305442	0.458838	1110058L19Rik
ENSMUSG00000026153.15	423.769	0.77137	0.134385	6.64083e-09	4.47201e-08	Fam135a
ENSMUSG00000100131.1	9074.1	0.414486	0.0499362	9.05667e-17	1.16286e-15	Gm28439
ENSMUSG00000067736.2	3992.6	0.484582	0.0610807	1.90353e-15	2.26428e-14	Gm10222
ENSMUSG00000101939.1	2789.32	0.315769	0.0650814	1.16096e-06	5.98716e-06	Gm28438
ENSMUSG00000101111.1	34802.4	0.409783	0.0397773	7.57795e-25	1.4042e-23	Gm28437
ENSMUSG00000100862.1	41705.1	0.505475	0.0403841	2.57229e-36	6.86451e-35	Gm10925
ENSMUSG00000102070.1	35845.1	0.396148	0.0394652	9.81669e-24	1.74728e-22	Gm28661
ENSMUSG00000101249.1	23464	0.160315	0.0474549	0.00072273	0.00243728	Gm29216
ENSMUSG00000073725.8	143.643	-0.0455282	0.214805	0.827275	0.895145	Lmbrd1
ENSMUSG00000086240.4	33.9917	-0.288891	0.415064	0.445827	0.600192	Gm7846
ENSMUSG00000099492.1	61.219	-0.571444	0.330935	0.0678127	0.138678	Gm5525
ENSMUSG00000048874.15	4366.43	-0.171257	0.0578547	0.00299793	0.00894399	Phf3
ENSMUSG00000103783.1	8.91253	-0.149374	0.664285	0.766783	0.857328	RP24-172B22.6
ENSMUSG00000104315.1	26.4478	0.307033	0.45389	0.449691	0.603644	RP23-471J16.2
ENSMUSG00000026064.16	24.439	0.563204	0.477498	0.18197	0.309467	Ptp4a1
ENSMUSG00000117310.2	6.49166	0.704002	0.824744	0.210799	0.346909	NA
ENSMUSG00000117091.1	902.2	8.54758	0.349457	3.49942e-131	3.37773e-129	NA
ENSMUSG00000086726.3	12.6212	7.9545	2.72549	4.29604e-07	2.35179e-06	Gm9458
ENSMUSG00000086727.8	556.589	9.38905	0.586542	2.53305e-56	1.04118e-54	4931428L18Rik
ENSMUSG00000094215.2	897.418	10.0865	0.58404	3.54734e-65	1.68681e-63	Gm6489
ENSMUSG00000070960.4	31.8148	0.196952	0.419887	0.60747	0.73974	Gm10307
ENSMUSG00000102917.1	5.92217	0.414146	0.776802	0.43342	0.587986	RP23-75G11.4
ENSMUSG00000100481.1	3.22818	0.171027	0.839296	0.726226	0.829088	Gm7114
ENSMUSG00000026134.11	467.21	0.110012	0.124034	0.372068	0.528946	Prim2
ENSMUSG00000102714.1	3.21553	0.168866	0.859868	0.722274	0.826505	RP24-423J19.3
ENSMUSG00000004768.14	425.959	-0.0615944	0.13094	0.634429	0.760022	Rab23
ENSMUSG00000042215.8	19.7203	0.351184	0.518707	0.433227	0.58781	Bag2
ENSMUSG00000042197.13	1184.9	0.31312	0.0831509	0.000157848	0.000594183	Zfp451
ENSMUSG00000081402.4	697.382	6.32785	0.206103	6.10784e-207	8.90964e-205	Gm15455
ENSMUSG00000042182.16	34.0796	0.749702	0.438498	0.0572223	0.120357	Bend6
ENSMUSG00000026131.20	16546.4	2.33427	0.0468811	0	0	Dst
ENSMUSG00000103364.1	6.15417	1.32582	1.02623	0.0467461	0.101323	RP23-87D8.4
ENSMUSG00000096992.3	1199.11	6.74279	0.176072	0	0	Gm26788
ENSMUSG00000103001.1	5.39393	1.96766	1.35308	0.0177987	0.043738	RP24-422C24.3
ENSMUSG00000104397.1	8.04635	7.07578	2.70729	9.39545e-06	4.29701e-05	RP24-152H15.5
ENSMUSG00000102336.1	6.37484	2.42936	1.2065	0.00499925	0.0141118	mmu-mir-5103
ENSMUSG00000042111.9	423.393	0.596375	0.132248	5.31185e-06	2.51907e-05	Ccdc115
ENSMUSG00000101711.1	3.76885	-0.0714847	0.809613	0.884024	0.930903	Gm28306
ENSMUSG00000026127.13	1320.48	0.27711	0.079368	0.000461798	0.00160821	Imp4
ENSMUSG00000026126.15	18.0935	0.561563	0.546542	0.224716	0.364983	Ptpn18
ENSMUSG00000100280.2	6.42093	1.42482	1.0871	0.0376236	0.0842007	Gm28417
ENSMUSG00000103521.1	15.9357	8.39263	2.7505	8.41642e-08	4.97826e-07	RP24-70I14.6
ENSMUSG00000104098.1	14.8217	6.14115	1.40025	7.98646e-06	3.69093e-05	RP24-70I14.4
ENSMUSG00000037509.21	42.8358	0.512774	0.378156	0.143605	0.257063	Arhgef4
ENSMUSG00000104002.2	8.69351	-0.722171	0.787911	0.204676	0.339162	RP23-348C6.3
ENSMUSG00000037503.12	1722.41	-0.0441459	0.0785871	0.572904	0.710828	Fam168b
ENSMUSG00000104358.1	21.5049	0.29237	0.507734	0.509741	0.657852	RP23-348C6.1
ENSMUSG00000026123.11	461.796	-0.243039	0.127676	0.0547608	0.116037	Plekhb2
ENSMUSG00000102531.1	1.62652	-0.280952	0.963872	0.508131	NA	RP24-72B22.1
ENSMUSG00000102279.1	3.32179	-0.359484	0.905452	0.460594	0.61348	RP24-424K5.3
ENSMUSG00000103708.1	10.7127	-0.366297	0.65866	0.4711	0.622644	RP24-424K5.4
ENSMUSG00000104201.1	3.09001	0.196893	0.861144	0.682588	NA	RP24-424K5.1
ENSMUSG00000102434.1	3.68139	0.574543	0.930835	0.286157	0.437248	RP24-424K5.2
ENSMUSG00000045216.7	1973.59	-0.44926	0.0799371	1.70233e-08	1.09397e-07	Hs6st1
ENSMUSG00000102202.1	23.1096	0.468093	0.489447	0.277067	0.426752	RP23-173H19.3
ENSMUSG00000037470.14	1745.55	-0.336107	0.0729358	3.81319e-06	1.84258e-05	Uggt1
ENSMUSG00000047180.8	2.46233	-0.569931	1.04557	0.261212	NA	Neurl3
ENSMUSG00000037447.16	141.522	2.1531	0.226023	3.07727e-22	5.15562e-21	Arid5a
ENSMUSG00000102762.1	3.92968	0.359636	0.855471	0.483522	0.633582	RP23-134L6.5
ENSMUSG00000010453.12	877.617	0.00384966	0.0968437	0.968846	0.980776	Kansl3
ENSMUSG00000037432.15	57.7389	0.1409	0.322022	0.645604	0.769419	Fer1l5
ENSMUSG00000001143.13	182.115	0.504534	0.190177	0.00684197	0.0186645	Lman2l
ENSMUSG00000037408.10	83.4752	1.39028	0.288596	5.12144e-07	2.77777e-06	Cnnm4
ENSMUSG00000001138.13	241.667	0.446562	0.170532	0.00779402	0.0209929	Cnnm3
ENSMUSG00000067653.12	6.14372	0.0151515	0.727075	0.978266	0.986518	Ankrd23
ENSMUSG00000079610.9	44.3971	-0.590321	0.394302	0.102718	0.195721	Ankrd39
ENSMUSG00000026121.13	88.9684	-0.748074	0.297833	0.00845711	0.0225876	Sema4c
ENSMUSG00000087589.3	17.9839	-1.89708	0.748044	0.0028214	0.00845637	D430040D24Rik
ENSMUSG00000046337.17	216.723	0.0372845	0.177198	0.831455	0.897716	Fam178b
ENSMUSG00000061518.11	964.338	-0.517736	0.0935452	2.73527e-08	1.70963e-07	Cox5b
ENSMUSG00000037351.9	738.656	0.0119732	0.104295	0.908815	0.946426	Actr1b
ENSMUSG00000026117.10	47.4223	-0.771985	0.396363	0.0353298	0.0796951	Zap70
ENSMUSG00000026116.11	1848.74	0.53715	0.0698495	1.2953e-14	1.46464e-13	Tmem131
ENSMUSG00000102930.1	6.53061	0.3726	0.758034	0.479188	0.629619	RP23-328J8.2
ENSMUSG00000103159.1	6.68274	0.137622	0.713137	0.789688	0.87169	RP23-328J8.3
ENSMUSG00000050122.19	110.452	-0.798844	0.257067	0.0013176	0.00422387	Vwa3b
ENSMUSG00000026114.14	39.9089	1.53931	0.413348	5.92169e-05	0.000240953	Cnga3
ENSMUSG00000026113.17	123.639	-0.0481272	0.231766	0.830077	0.896932	Inpp4a
ENSMUSG00000026112.7	633.736	-0.852863	0.115612	1.09201e-13	1.15205e-12	Coa5
ENSMUSG00000026111.15	311.032	0.0420873	0.148793	0.775674	0.862547	Unc50
ENSMUSG00000026110.15	112.285	0.577727	0.241326	0.0134527	0.0341483	Mgat4a
ENSMUSG00000026090.16	10.1203	0.317421	0.645233	0.52959	0.675027	2010300C02Rik
ENSMUSG00000060771.15	31.3625	-0.691595	0.455467	0.0909609	0.176969	Tsga10
ENSMUSG00000037216.5	45.0349	0.144931	0.361605	0.668873	0.786902	Lipt1
ENSMUSG00000026088.15	151.776	0.049269	0.208244	0.809916	0.885499	Mitd1
ENSMUSG00000026087.11	466.881	-0.402957	0.126549	0.00132963	0.0042554	Mrpl30
ENSMUSG00000058407.12	1259.05	0.261572	0.0829955	0.00157251	0.00496553	Txndc9
ENSMUSG00000026083.12	2268.57	0.711109	0.0652949	9.69881e-28	1.99329e-26	Eif5b
ENSMUSG00000026082.11	630.264	-0.5192	0.112334	3.31025e-06	1.61362e-05	Rev1
ENSMUSG00000103804.1	7.60469	-0.271895	0.719251	0.600052	0.733699	RP23-195A24.4
ENSMUSG00000037138.18	22.6583	1.58594	0.571714	0.00147034	0.00465884	Aff3
ENSMUSG00000048814.11	25.0899	0.707896	0.481815	0.0956518	0.184559	Lonrf2
ENSMUSG00000026080.13	40.9736	0.232637	0.392161	0.519995	0.666783	Chst10
ENSMUSG00000026078.10	633.347	-0.13465	0.109497	0.215732	0.353286	Pdcl3
ENSMUSG00000103046.1	13.8299	-0.865529	0.683003	0.108863	0.205272	RP23-101P2.6
ENSMUSG00000026077.15	11.9907	0.236891	0.606964	0.630254	0.756702	Npas2
ENSMUSG00000073702.11	10999.8	0.20753	0.0526004	8.04141e-05	0.000318846	Rpl31
ENSMUSG00000003134.10	320.742	0.136643	0.147032	0.348053	0.504526	Tbc1d8
ENSMUSG00000003135.15	734.012	-0.114365	0.103635	0.266945	0.415044	Cnot11
ENSMUSG00000085894.1	25.1508	-0.613265	0.522846	0.171444	0.295293	Gm15832
ENSMUSG00000077704.1	5.17382	0.118903	0.759436	0.816675	0.888638	Snord89
ENSMUSG00000048234.13	324.369	-0.610334	0.152299	4.92646e-05	0.000202668	Rnf149
ENSMUSG00000050967.5	26.7021	0.732541	0.470602	0.0787438	0.157366	Creg2
ENSMUSG00000097083.1	26.2051	-0.894386	0.51556	0.0468255	0.101477	D930019O06Rik
ENSMUSG00000057173.8	4.68639	-0.304886	0.810247	0.557392	0.698757	Rfx8
ENSMUSG00000026074.15	2126.92	-0.797378	0.0715162	5.264e-29	1.11859e-27	Map4k4
ENSMUSG00000026073.13	3.62859	-0.265635	0.845337	0.596137	0.730247	Il1r2
ENSMUSG00000026072.12	12.2166	1.19887	0.717832	0.0334062	0.0758826	Il1r1
ENSMUSG00000070942.8	2.15421	-0.376794	0.973272	0.388272	NA	Il1rl2
ENSMUSG00000041945.12	10.33	0.923896	0.738699	0.0974673	0.187298	Mfsd9
ENSMUSG00000045515.4	15.6421	0.903715	0.630041	0.0788794	0.15754	Pou3f3
ENSMUSG00000060679.14	535.742	-0.0878117	0.117285	0.450553	0.604466	Mrps9
ENSMUSG00000041907.9	2.65979	0.169502	0.8826	0.716895	NA	Gpr45
ENSMUSG00000070939.9	171.271	-0.178201	0.198315	0.358891	0.515957	Tgfbrap1
ENSMUSG00000010290.7	347.466	0.320728	0.141153	0.0218269	0.0524608	AI597479
ENSMUSG00000008136.14	8.45931	-0.393655	0.711089	0.452654	0.606404	Fhl2
ENSMUSG00000094497.1	2125.55	0.020244	0.0681915	0.766643	0.857271	Gm8210
ENSMUSG00000099576.1	3.02049	-0.416149	0.933801	0.407746	NA	Gm29040
ENSMUSG00000066877.11	124.209	0.424928	0.228864	0.0562691	0.118712	Nck2
ENSMUSG00000103945.1	6.90484	-0.834127	0.88976	0.164497	0.286224	RP23-435E15.3
ENSMUSG00000026051.8	1.81188	-0.346547	0.974528	0.434775	NA	1500015O10Rik
ENSMUSG00000057363.12	314.904	-0.0291145	0.149397	0.842951	0.905743	Uxs1
ENSMUSG00000100701.1	4.64404	-0.00847746	0.780056	0.984709	0.990389	Gm19587
ENSMUSG00000041763.14	1720.42	0.173794	0.0781422	0.0256789	0.0604654	Tpp2
ENSMUSG00000047343.4	5.52748	0.306694	0.773304	0.554471	0.695833	Mettl21c
ENSMUSG00000091844.2	8.20839	0.0357797	0.687126	0.94562	0.967768	Gm8251
ENSMUSG00000026049.11	344.96	0.341699	0.143834	0.0163141	0.0404485	Tex30
ENSMUSG00000026047.13	142.734	-0.0680183	0.21435	0.744472	0.841678	Kdelc1
ENSMUSG00000041684.11	211.55	-0.104466	0.188492	0.57167	0.709898	Bivm
ENSMUSG00000026048.16	434.097	-0.523604	0.131448	5.84656e-05	0.000238146	Ercc5
ENSMUSG00000056870.9	26.1921	-0.236164	0.460158	0.56493	0.70461	Gulp1
ENSMUSG00000026042.16	10.3516	-0.385745	0.667006	0.453223	0.606747	Col5a2
ENSMUSG00000025995.16	1637.04	-0.320725	0.0764571	2.56746e-05	0.000110801	Wdr75
ENSMUSG00000084817.3	41.5806	-0.311378	0.381216	0.378101	0.534915	Gm5526
ENSMUSG00000025993.10	25.4067	2.03577	0.531725	2.36037e-05	0.000102263	Slc40a1
ENSMUSG00000041144.12	62.945	5.60483	0.558365	4.80042e-24	8.69588e-23	Dnah7b
ENSMUSG00000101337.6	826.368	7.68766	0.277353	1.56951e-168	2.00329e-166	Dnah7c
ENSMUSG00000025986.6	608.755	-0.258146	0.113041	0.0215133	0.0517713	Slc39a10
ENSMUSG00000100213.1	7.93206	0.0820058	0.680098	0.873285	0.924826	Gm28151
ENSMUSG00000101447.1	146.938	12.1378	3.05608	2.09382e-15	2.48606e-14	Gm28826
ENSMUSG00000100033.1	5.27073	0.766089	0.928672	0.183731	0.31156	Gm8337
ENSMUSG00000094968.1	24.2153	9.12674	2.79472	3.69061e-09	2.5682e-08	Gm22419
ENSMUSG00000101760.1	16.5885	5.47765	1.13891	6.21165e-07	3.32631e-06	Gm8384
ENSMUSG00000100816.1	5.45686	1.66192	1.21684	0.0269213	0.0629354	Gm28321
ENSMUSG00000026109.14	12.448	1.07741	1.66964	0.0466574	0.101196	Tmeff2
ENSMUSG00000026107.11	2085.61	0.62225	0.0708516	1.27211e-18	1.81339e-17	Nabp1
ENSMUSG00000099413.1	215.589	7.03062	0.442813	1.70405e-56	7.03409e-55	Gm17767
ENSMUSG00000101741.1	2.82117	-0.101725	0.859495	0.82836	NA	Gm28055
ENSMUSG00000018417.14	811.816	0.575683	0.0971995	2.62034e-09	1.85335e-08	Myo1b
ENSMUSG00000072324.4	9.84272	-0.311864	0.663332	0.541432	0.685482	Gm8420
ENSMUSG00000062939.11	32.6067	-1.16882	0.485752	0.00721082	0.019566	Stat4
ENSMUSG00000026104.14	34.76	-0.592521	0.435635	0.132738	0.241626	Stat1
ENSMUSG00000026103.14	1287.28	-0.0298109	0.0904101	0.73982	0.838881	Gls
ENSMUSG00000002881.14	98.6953	0.0587032	0.253511	0.812256	0.886462	Nab1
ENSMUSG00000100007.1	39.4029	-0.1731	0.38484	0.626249	0.753756	Gm5527
ENSMUSG00000043015.15	118.749	-0.745981	0.24759	0.00188942	0.00586601	Tmem194b
ENSMUSG00000041439.15	28.9702	-0.0726237	0.452208	0.855896	0.914436	Mfsd6
ENSMUSG00000026102.9	27.1866	-0.234085	0.472164	0.57526	0.712638	Inpp1
ENSMUSG00000041426.12	136.33	-0.555808	0.230504	0.0130156	0.0331474	Hibch
ENSMUSG00000043629.12	459.656	-1.46379	0.144204	1.14792e-24	2.11699e-23	1700019D03Rik
ENSMUSG00000060715.9	4.22129	-0.187934	0.804074	0.710082	0.817487	1700019A02Rik
ENSMUSG00000026098.13	181.635	-0.329265	0.204342	0.0990521	0.18978	Pms1
ENSMUSG00000026097.9	201.811	-1.01815	0.197776	1.47324e-07	8.47387e-07	Ormdl1
ENSMUSG00000026096.14	158.555	0.00756598	0.209457	0.971549	0.982368	Osgepl1
ENSMUSG00000026095.15	106.781	0.0213754	0.245542	0.929501	0.958655	Asnsd1
ENSMUSG00000096141.2	10.0572	1.73585	0.896176	0.0100201	0.0262791	Dnah7a
ENSMUSG00000026094.14	487.47	1.37754	0.127412	1.09275e-27	2.24106e-26	Stk17b
ENSMUSG00000042807.15	81.762	1.04941	0.295677	0.000195113	0.000724477	Hecw2
ENSMUSG00000025983.11	14.6896	1.03874	0.650347	0.0471862	0.102092	Ccdc150
ENSMUSG00000041303.7	1039.32	0.631691	0.0927195	7.46891e-12	6.7241e-11	Gtf3c3
ENSMUSG00000073678.4	735.846	-1.83646	0.119412	7.11026e-54	2.81523e-52	Pgap1
ENSMUSG00000052331.14	84.4664	0.433903	0.274727	0.100119	0.191541	Ankrd44
ENSMUSG00000102642.1	22.632	8.9769	2.78787	7.67989e-09	5.1414e-08	RP23-68O7.2
ENSMUSG00000025982.13	6023.45	0.465391	0.0522226	4.54414e-19	6.58408e-18	Sf3b1
ENSMUSG00000025981.13	525.98	0.912958	0.121805	4.14107e-14	4.51607e-13	Coq10b
ENSMUSG00000101122.1	18.0329	1.96157	0.63457	0.000364207	0.00129106	Gm17971
ENSMUSG00000025980.14	9297.01	-0.137098	0.113864	0.224923	0.365257	Hspd1
ENSMUSG00000073676.4	2598.24	-0.447356	0.0671388	2.45914e-11	2.11667e-10	Hspe1
ENSMUSG00000089670.1	3.75048	0.557267	0.916069	0.298756	0.451451	Gm16581
ENSMUSG00000025979.13	848.809	-0.20463	0.105539	0.0509675	0.109238	Mob4
ENSMUSG00000061863.6	2.57805	0.210176	0.886214	0.655586	NA	Gm6822
ENSMUSG00000025978.14	7.16049	0.0206021	0.702747	0.96992	0.981373	Rftn2
ENSMUSG00000046994.9	388.103	-0.531163	0.140596	0.00013308	0.000507943	Mars2
ENSMUSG00000025977.15	20.3913	1.43892	0.573273	0.00358987	0.0105239	Boll
ENSMUSG00000100215.1	22.9561	-0.205189	0.489165	0.631955	0.758088	Gm8292
ENSMUSG00000038349.10	13.1153	4.56387	1.03976	2.11286e-06	1.05241e-05	Plcl1
ENSMUSG00000102145.1	41.8457	0.598348	0.376929	0.0866353	0.170088	RP23-453N3.4
ENSMUSG00000099950.1	164.369	8.54994	0.819795	2.12684e-24	3.88174e-23	9130227L01Rik
ENSMUSG00000038331.15	341.394	2.05609	0.151238	8.98291e-43	2.82002e-41	Satb2
ENSMUSG00000087022.4	20.5813	2.01892	0.5954	0.000125326	0.000479955	9130024F11Rik
ENSMUSG00000097519.2	23.3706	-0.179818	0.480436	0.669686	0.787469	4930558J18Rik
ENSMUSG00000038323.3	125.331	-0.126365	0.245985	0.597145	0.731159	1700066M21Rik
ENSMUSG00000048495.16	163.829	-0.396247	0.206017	0.0494421	0.106332	Tyw5
ENSMUSG00000025971.6	171.935	0.0466805	0.20112	0.813577	0.8872	9430016H08Rik
ENSMUSG00000102685.1	5.98531	3.04762	1.33629	0.00235855	0.00718002	RP23-433B11.1
ENSMUSG00000038305.15	62.7571	-1.44372	0.374632	4.00751e-05	0.000167492	Spats2l
ENSMUSG00000054770.16	225.84	-0.101122	0.17554	0.558124	0.699055	Kctd18
ENSMUSG00000026039.9	932.424	0.125588	0.0925616	0.172929	0.297329	Sgol2
ENSMUSG00000063558.4	16.5103	-0.435039	0.57485	0.362086	0.519089	Aox1
ENSMUSG00000064294.12	16.2592	-2.50118	0.882625	0.000959366	0.00316165	Aox3
ENSMUSG00000038242.12	7.73405	0.128085	0.685812	0.802671	0.880655	Aox4
ENSMUSG00000079554.2	2.80984	-0.356775	0.917577	0.467748	NA	Aox2
ENSMUSG00000103839.1	24.9818	-0.778566	0.527296	0.0889715	0.173699	RP24-191N24.2
ENSMUSG00000051223.14	5203.55	-0.159635	0.0537765	0.00295417	0.00882701	Bzw1
ENSMUSG00000026034.17	1719.39	1.41695	0.0746022	6.65876e-81	3.97497e-79	Clk1
ENSMUSG00000026035.15	162.971	-0.837438	0.221665	0.00011043	0.000427378	Ppil3
ENSMUSG00000026036.17	491.827	-0.505728	0.128884	7.42565e-05	0.000296735	Nif3l1
ENSMUSG00000026037.14	1280.52	0.021526	0.0852356	0.800312	0.879061	Orc2
ENSMUSG00000094245.1	3.55896	0.521828	0.917716	0.325235	0.48057	Gm23966
ENSMUSG00000085054.2	4.83204	-0.520077	0.877745	0.336374	0.492193	Gm15834
ENSMUSG00000038174.14	465.888	0.532104	0.12489	1.72626e-05	7.63073e-05	Fam126b
ENSMUSG00000026032.8	259.414	-0.276756	0.165958	0.0909907	0.177009	Ndufb3
ENSMUSG00000059647.5	29.2577	-0.399649	0.44981	0.322736	0.477714	Gm10068
ENSMUSG00000026031.15	123.968	1.66742	0.237406	6.4156e-13	6.35694e-12	Cflar
ENSMUSG00000026029.14	50.3882	1.25059	0.367018	0.000267569	0.000970119	Casp8
ENSMUSG00000026028.12	1753.49	1.93586	0.0747276	1.15945e-148	1.31546e-146	Trak2
ENSMUSG00000026027.13	82.1234	0.402007	0.275727	0.129241	0.236235	Stradb
ENSMUSG00000072295.7	3.55951	-0.251042	0.843508	0.615396	0.745845	Als2cr11
ENSMUSG00000038079.14	105.384	-0.34668	0.257755	0.164677	0.286486	Tmem237
ENSMUSG00000079550.9	7.12386	-0.137102	0.708256	0.78704	0.86995	Mpp4
ENSMUSG00000101586.1	6.32842	0.201276	0.765178	0.692937	0.805815	Gm29017
ENSMUSG00000026024.14	947.867	0.618332	0.0903232	6.20311e-12	5.64212e-11	Als2
ENSMUSG00000041075.8	394.184	1.45824	0.135428	1.87023e-27	3.7875e-26	Fzd7
ENSMUSG00000047361.16	85.9458	4.13427	0.358336	1.13585e-31	2.64546e-30	Gm973
ENSMUSG00000026021.15	1459.7	-0.696819	0.0854568	2.50211e-16	3.12578e-15	Sumo1
ENSMUSG00000103821.1	24.4304	-1.11555	0.566033	0.0219447	0.0527141	RP24-147G7.2
ENSMUSG00000101400.1	4.00051	0.975558	1.10026	0.111909	0.210057	Gm29596
ENSMUSG00000026020.9	4844.8	-0.213334	0.0567997	0.000167403	0.000627714	Nop58
ENSMUSG00000077345.1	5.88796	0.271751	0.753464	0.603216	0.736454	Snord70
ENSMUSG00000089512.3	5.6376	0.208827	0.751182	0.685827	0.800152	Gm26287
ENSMUSG00000089093.3	4.56979	-0.148882	0.797326	0.764262	0.855693	Snord11
ENSMUSG00000067336.6	239.039	0.169322	0.171458	0.316923	0.471701	Bmpr2
ENSMUSG00000041040.12	300.016	0.829538	0.151073	2.69821e-08	1.6881e-07	Fam117b
ENSMUSG00000103696.1	5.52176	1.04205	0.999706	0.0932734	0.18084	RP23-27C10.2
ENSMUSG00000026018.12	17.4442	0.199601	0.536295	0.663766	0.783217	Ica1l
ENSMUSG00000026019.15	694.4	-0.608206	0.107826	1.397e-08	9.03438e-08	Wdr12
ENSMUSG00000026017.13	82.2616	-0.992541	0.308641	0.000737513	0.00248217	Carf
ENSMUSG00000082609.1	8.0523	-0.59085	0.774132	0.286132	0.437248	Gm15464
ENSMUSG00000073664.11	595.759	-0.231559	0.118391	0.0486352	0.104958	Nbeal1
ENSMUSG00000049439.13	254.963	-0.607476	0.171786	0.000326437	0.0011672	Cyp20a1
ENSMUSG00000026782.15	395.328	0.458528	0.13653	0.000690091	0.002339	Abi2
ENSMUSG00000026014.15	546.889	-0.195608	0.122999	0.108743	0.205145	Raph1
ENSMUSG00000082160.1	3.20497	0.486584	0.921508	0.346309	0.502561	Gm11578
ENSMUSG00000101188.1	1128.43	0.104899	0.0856228	0.219349	0.357994	Eif4a-ps4
ENSMUSG00000081382.1	18.7779	-0.104771	0.518447	0.813545	0.8872	Rpl18-ps1
ENSMUSG00000052062.14	5.42771	0.812947	0.93189	0.162771	0.283756	Pard3b
ENSMUSG00000084333.1	18.3654	-0.222102	0.526171	0.621692	0.750697	Gm11599
ENSMUSG00000025969.15	169.617	-1.28746	0.228913	7.42573e-09	4.97983e-08	Nrp2
ENSMUSG00000040865.15	1145.05	-0.781789	0.091137	6.69101e-18	9.21308e-17	Ino80d
ENSMUSG00000084799.7	33.4667	-0.25076	0.417505	0.50983	0.657879	Ino80dos
ENSMUSG00000101599.1	161.558	-0.587343	0.213355	0.00487949	0.013814	Gm20342
ENSMUSG00000025968.16	1178.79	-0.139937	0.0861465	0.102802	0.195843	Ndufs1
ENSMUSG00000025967.16	10575.1	0.210559	0.0466556	6.29421e-06	2.94819e-05	Eef1b2
ENSMUSG00000064602.1	33.2387	0.412864	0.430786	0.288391	0.439899	Snora41
ENSMUSG00000046856.13	5.30154	-1.08784	1.1176	0.104175	0.198069	Gpr1
ENSMUSG00000086730.2	12.821	-1.18273	0.763248	0.0467088	0.101286	Gm11607
ENSMUSG00000087561.7	1.60254	-0.61304	1.18583	0.153399	NA	Gm11608
ENSMUSG00000027520.16	672.129	-1.46838	0.119078	2.35158e-35	6.15694e-34	Zdbf2
ENSMUSG00000081643.1	44.1995	-0.511315	0.380296	0.147297	0.261911	Gm11605
ENSMUSG00000025964.15	116.049	-0.304713	0.242162	0.194845	0.32625	Adam23
ENSMUSG00000025962.15	458.875	-0.172624	0.128923	0.176885	0.302852	Fastkd2
ENSMUSG00000025959.13	112.271	0.413037	0.246325	0.0839886	0.165832	Klf7
ENSMUSG00000025958.14	366.449	-0.503548	0.146118	0.00048914	0.00169504	Creb1
ENSMUSG00000025956.10	102.548	-0.866642	0.29282	0.00187095	0.0058143	Mettl21a
ENSMUSG00000087213.2	65.9385	1.8406	0.322689	2.83653e-09	1.99534e-08	2810408I11Rik
ENSMUSG00000070871.10	446.079	0.0617765	0.128152	0.627924	0.754746	Ccnyl1
ENSMUSG00000045005.9	949.119	-0.991244	0.0963289	4.72511e-25	8.82308e-24	Fzd5
ENSMUSG00000051344.13	234.68	0.4797	0.170583	0.00428281	0.0122861	Plekhm3
ENSMUSG00000084416.3	1486.67	-0.0358713	0.0849762	0.670105	0.787731	Rpl10a-ps1
ENSMUSG00000025955.13	6.21423	0.429793	0.797323	0.416497	0.571844	Akr1cl
ENSMUSG00000070870.6	7.78256	-0.0583855	0.696564	0.906641	0.945075	Cryge
ENSMUSG00000067299.11	6.24922	-0.897864	0.96448	0.143282	0.256678	Crygd
ENSMUSG00000100774.1	21.1237	-0.726572	0.545045	0.119754	0.222118	Gm7329
ENSMUSG00000044816.10	49.952	-0.862112	0.377981	0.0141263	0.0356345	D630023F18Rik
ENSMUSG00000025950.16	1197.24	-0.88631	0.0888098	1.16862e-23	2.06865e-22	Idh1
ENSMUSG00000025949.16	1315.24	0.171428	0.0843757	0.0415769	0.0916524	Pikfyve
ENSMUSG00000025946.13	2.9139	0.28043	0.890512	0.554827	NA	Pth2r
ENSMUSG00000015222.18	21.9602	0.656664	0.50786	0.136201	0.246735	Map2
ENSMUSG00000055567.18	10.7652	2.6585	0.968568	0.000628901	0.00214208	Unc80
ENSMUSG00000026005.15	890.806	0.207687	0.0951912	0.0283965	0.0658523	Rpe
ENSMUSG00000026004.15	129.066	0.328312	0.228534	0.139858	0.251939	Kansl1l
ENSMUSG00000102559.1	38.1494	-0.227342	0.395314	0.530932	0.676026	RP24-429G21.5
ENSMUSG00000102374.1	10.7121	-0.367378	0.668823	0.477144	0.628067	RP24-429G21.4
ENSMUSG00000102776.1	17.767	-0.0283841	0.525093	0.948021	0.968947	RP24-429G21.3
ENSMUSG00000082057.1	6.62983	0.656733	0.812606	0.23649	0.379876	Gm15789
ENSMUSG00000103756.1	14.7657	0.507467	0.593624	0.295203	0.447354	RP24-429G21.1
ENSMUSG00000103382.1	9.95866	-0.246955	0.656994	0.623824	0.752288	RP24-429G21.6
ENSMUSG00000026003.5	176.645	0.0601187	0.195133	0.754305	0.848667	Acadl
ENSMUSG00000082769.3	3.80339	-0.0793744	0.807546	0.871785	0.924163	Gm15793
ENSMUSG00000094191.1	32.8744	-0.305281	0.425827	0.430489	0.585155	Rpl31-ps14
ENSMUSG00000026000.16	391.821	0.615749	0.135332	4.35478e-06	2.08765e-05	Lancl1
ENSMUSG00000025991.8	19.7298	0.136861	0.512355	0.758041	0.851111	Cps1
ENSMUSG00000025997.13	20.3425	0.537051	0.533825	0.237985	0.381559	Ikzf2
ENSMUSG00000053153.14	7.83888	1.16709	0.886965	0.0588237	0.123058	Spag16
ENSMUSG00000026196.7	507.35	-0.146153	0.124074	0.234615	0.377628	Bard1
ENSMUSG00000089965.1	3.54763	0.235817	0.834006	0.639297	0.763926	Gm16236
ENSMUSG00000050296.14	3.17615	-0.143062	0.840438	0.767476	0.857708	Abca12
ENSMUSG00000026192.13	1177.48	-0.455857	0.0856786	9.37686e-08	5.52278e-07	Atic
ENSMUSG00000026193.15	16987.6	-0.399322	0.0433453	2.11713e-20	3.29386e-19	Fn1
ENSMUSG00000073652.10	9.1564	-0.0409545	0.653229	0.933449	0.960851	Apol7d
ENSMUSG00000101496.1	31.3177	-0.13585	0.429326	0.726561	0.829372	Gm8885
ENSMUSG00000039395.8	1818.55	0.299002	0.0750978	6.52335e-05	0.000263556	Mreg
ENSMUSG00000094655.1	3.36359	0.0297821	0.856518	0.951478	0.970882	Gm25360
ENSMUSG00000093956.1	4.53601	0.289199	0.817782	0.572899	0.710828	Gm24497
ENSMUSG00000026189.13	199.178	0.180018	0.184447	0.321163	0.47633	Pecr
ENSMUSG00000026187.9	1326.02	0.381842	0.0792783	1.35174e-06	6.9086e-06	Xrcc5
ENSMUSG00000039354.16	309.07	-0.262149	0.154638	0.0858108	0.168708	Smarcal1
ENSMUSG00000110712.1	6.24163	0.464152	0.771784	0.386099	0.542488	NA
ENSMUSG00000046330.10	7441.62	-0.0992729	0.0505983	0.049518	0.106484	Rpl37a
ENSMUSG00000039323.18	6363.29	0.472061	0.0522342	1.46111e-19	2.16389e-18	Igfbp2
ENSMUSG00000026185.8	10.0526	-0.683404	0.732671	0.213262	0.35019	Igfbp5
ENSMUSG00000100301.6	97.476	6.24826	0.538331	2.78925e-31	6.40406e-30	6030407O03Rik
ENSMUSG00000101344.1	54.4732	4.72904	0.503949	9.53185e-22	1.55925e-20	Gm29183
ENSMUSG00000098504.1	15.6173	8.34053	2.74337	9.42791e-08	5.54948e-07	Mir6351
ENSMUSG00000055322.16	200.481	-0.827119	0.195148	1.55753e-05	6.92113e-05	Tns1
ENSMUSG00000006304.14	1370.12	-0.478079	0.0870305	3.45287e-08	2.12934e-07	Arpc2
ENSMUSG00000006299.13	1172.19	0.0154044	0.0895104	0.86359	0.919264	Aamp
ENSMUSG00000026179.14	363.12	-0.585089	0.145105	4.61655e-05	0.000190647	Pnkd
ENSMUSG00000006301.17	197.711	-0.529792	0.192758	0.00511383	0.0143996	Tmbim1
ENSMUSG00000103403.1	4.18059	-0.230756	0.823079	0.649692	0.77244	RP23-280F6.6
ENSMUSG00000073650.8	12.8695	-1.42459	0.812276	0.0244523	0.0579383	Catip
ENSMUSG00000026177.11	54.662	-2.18497	0.437404	1.40064e-07	8.07784e-07	Slc11a1
ENSMUSG00000026176.13	254.2	-0.665605	0.170658	8.8744e-05	0.000349163	Ctdsp1
ENSMUSG00000026175.12	32.9405	-0.106764	0.413831	0.776255	0.862831	Vil1
ENSMUSG00000033364.13	1905.86	0.0939831	0.0719425	0.190406	0.320358	Usp37
ENSMUSG00000103227.1	16.4412	-0.502255	0.588147	0.30223	0.455387	RP23-102B12.2
ENSMUSG00000026174.9	1219.63	-0.251458	0.0904095	0.00519191	0.0145919	Rqcd1
ENSMUSG00000026173.15	38.8867	0.150191	0.390109	0.678821	0.79523	Plcd4
ENSMUSG00000026135.17	598.675	0.571178	0.110144	1.79857e-07	1.0266e-06	Zfp142
ENSMUSG00000026172.12	96.9114	-0.0892323	0.257031	0.718874	0.823987	Bcs1l
ENSMUSG00000026171.12	451.726	0.334968	0.129674	0.00927462	0.0245212	Rnf25
ENSMUSG00000033276.18	40.0353	-0.121973	0.382151	0.729797	0.831892	Stk36
ENSMUSG00000033257.14	716.704	-0.0755429	0.103515	0.462629	0.615287	Ttll4
ENSMUSG00000026170.6	28.8996	0.211753	0.435688	0.591703	0.726605	Cyp27a1
ENSMUSG00000033227.7	5.14984	-0.0781646	0.766754	0.875163	0.926183	Wnt6
ENSMUSG00000090071.4	9.36585	0.61531	0.710774	0.246942	0.392151	Cdk5r2
ENSMUSG00000006538.12	3.55951	-0.251042	0.843508	0.615396	0.745845	Ihh
ENSMUSG00000026162.7	20.0337	-0.901149	0.593078	0.0685765	0.139993	Nhej1
ENSMUSG00000026205.8	13.4987	3.647	0.87601	3.75225e-06	1.81404e-05	Slc23a3
ENSMUSG00000033159.14	158.492	0.575529	0.214533	0.00606722	0.0167941	Cnppd1
ENSMUSG00000049339.16	243.023	0.370947	0.169599	0.0266339	0.0623961	Fam134a
ENSMUSG00000026197.12	76.3985	-0.195214	0.290809	0.483289	0.633361	Zfand2b
ENSMUSG00000026198.15	21.2233	0.114673	0.491284	0.791304	0.872639	Abcb6
ENSMUSG00000033124.16	117.096	0.641638	0.242928	0.00650456	0.0178721	Atg9a
ENSMUSG00000026199.17	224.799	0.064928	0.174255	0.706423	0.814823	Ankzf1
ENSMUSG00000026200.13	34.2696	-0.51834	0.42888	0.181838	0.309296	Glb1l
ENSMUSG00000026201.12	220.267	-0.317292	0.177861	0.0697835	0.142124	Stk16
ENSMUSG00000026202.13	770.638	0.47286	0.101735	3.02046e-06	1.47793e-05	Tuba4a
ENSMUSG00000096094.2	5.59745	-0.463347	0.81842	0.389479	0.545531	A630095N17Rik
ENSMUSG00000026203.16	109.013	-0.418812	0.252382	0.0868195	0.170381	Dnajb2
ENSMUSG00000026204.15	13.5648	0.0230239	0.577415	0.963204	0.977593	Ptprn
ENSMUSG00000026209.15	658.577	0.135784	0.107797	0.206016	0.340888	Dnpep
ENSMUSG00000026208.9	189.204	1.11674	0.1929	3.56368e-09	2.48433e-08	Des
ENSMUSG00000026207.16	24.3471	0.592872	0.491716	0.170232	0.29378	Speg
ENSMUSG00000033021.16	315.537	-0.0564582	0.150354	0.70346	0.812855	Gmppa
ENSMUSG00000032997.16	202.629	0.370746	0.182733	0.0391442	0.0870813	Chpf
ENSMUSG00000026211.17	121.89	-0.011906	0.234928	0.957511	0.974386	Obsl1
ENSMUSG00000051703.14	4.82027	-3.33661	2.54668	0.00597845	0.0165744	Tmem198
ENSMUSG00000032968.4	2.04311	-0.124794	0.899999	0.775696	NA	Inha
ENSMUSG00000026213.15	253.401	-0.319089	0.166415	0.0518522	0.110816	Stk11ip
ENSMUSG00000006576.16	25.5021	0.133492	0.458547	0.74639	0.843177	Slc4a3
ENSMUSG00000026235.14	1200.88	-0.992476	0.0913233	8.93327e-28	1.84181e-26	Epha4
ENSMUSG00000032908.9	12.1066	0.303072	0.60862	0.537017	0.681702	Sgpp2
ENSMUSG00000026245.16	1483.71	0.175234	0.0813158	0.0305656	0.0701696	Farsb
ENSMUSG00000104018.1	5.07404	0.561793	0.84861	0.304808	0.458381	RP24-300L5.1
ENSMUSG00000090486.2	5.52781	0.168741	0.750109	0.744419	0.841678	BC035947
ENSMUSG00000099364.1	3.93286	-1.02608	1.26465	0.108309	0.204547	5730419F03Rik
ENSMUSG00000032883.15	866.243	-0.0556052	0.0987904	0.57076	0.709332	Acsl3
ENSMUSG00000079470.8	891.847	1.52799	0.0936137	2.24631e-60	9.83764e-59	Utp14b
ENSMUSG00000099377.1	24.2888	0.328994	0.469542	0.43017	0.584926	Gm6159
ENSMUSG00000054702.14	34.5867	0.65139	0.423235	0.0890479	0.173805	Ap1s3
ENSMUSG00000073643.11	545.436	-0.444156	0.120699	0.000206245	0.00076289	Wdfy1
ENSMUSG00000026248.9	366.777	0.531464	0.138639	0.000108735	0.000421157	Mrpl44
ENSMUSG00000026249.10	141.51	-0.255337	0.221576	0.236692	0.380043	Serpine2
ENSMUSG00000067106.6	3.87346	-0.187509	0.842456	0.696675	0.808192	Gm5529
ENSMUSG00000099552.1	8.45348	-0.509792	0.758135	0.35022	0.506953	9830004L10Rik
ENSMUSG00000043230.2	2.56639	0.128476	0.868898	0.781293	NA	Fam124b
ENSMUSG00000004364.14	2465.33	0.793521	0.0640281	1.97665e-35	5.1893e-34	Cul3
ENSMUSG00000103076.1	14.69	1.58943	0.703701	0.00556827	0.0155484	RP24-193D9.4
ENSMUSG00000103525.1	3.65125	0.205566	0.829446	0.681107	0.796513	RP24-193D9.3
ENSMUSG00000101722.1	173.92	12.41	3.07415	4.76222e-16	5.86243e-15	Gm29125
ENSMUSG00000101483.1	10.8854	7.67031	2.71472	1.20799e-06	6.21483e-06	1700016L21Rik
ENSMUSG00000038608.15	10.4577	0.100098	0.626744	0.841411	0.904539	Dock10
ENSMUSG00000055980.2	39.2919	3.51951	0.493167	1.045e-13	1.10606e-12	Irs1
ENSMUSG00000026142.15	296.634	-0.0914394	0.15308	0.545093	0.688544	Rhbdd1
ENSMUSG00000104493.1	4.79606	1.65629	1.30332	0.0299869	0.0690782	RP23-430H22.1
ENSMUSG00000100786.1	884.772	9.08621	0.420887	4.56725e-102	3.36917e-100	Gm28940
ENSMUSG00000096779.1	294.992	13.2667	3.15826	4.41118e-18	6.13486e-17	Gm22112
ENSMUSG00000067158.9	4.09413	0.20576	0.811773	0.682704	0.797402	Col4a4
ENSMUSG00000026150.14	786.717	0.0638652	0.100171	0.521951	0.668655	Mff
ENSMUSG00000101450.1	18.8574	-0.37617	0.55848	0.419388	0.574224	Gm28941
ENSMUSG00000026149.2	3.68711	-0.0466933	0.809715	0.923288	0.954713	Tm4sf20
ENSMUSG00000026159.13	1637.65	-0.0713116	0.0765886	0.349409	0.506151	Agfg1
ENSMUSG00000113880.1	6.13206	-0.0585182	0.73699	0.906363	0.944887	NA
ENSMUSG00000038496.16	33.3584	1.58298	0.473512	0.000224818	0.000824827	Slc19a3
ENSMUSG00000100580.6	4.28542	0.904723	1.10282	0.131352	0.239552	4933436I20Rik
ENSMUSG00000045658.16	179.205	-0.407195	0.199569	0.0374646	0.0839223	Pid1
ENSMUSG00000101934.1	23.5783	9.04953	2.79293	5.64191e-09	3.82991e-08	Gm18304
ENSMUSG00000036766.12	279.364	1.02092	0.156291	3.72128e-11	3.14445e-10	Dner
ENSMUSG00000104396.1	7.41393	6.88736	2.70562	1.6304e-05	7.22012e-05	RP23-147I4.1
ENSMUSG00000026219.14	9375.03	-0.0638828	0.0513865	0.211875	0.348266	Trip12
ENSMUSG00000103505.1	13.5272	1.30917	0.705606	0.019599	0.047661	RP23-447L15.2
ENSMUSG00000104503.1	60.6268	1.58503	0.332057	5.38143e-07	2.91147e-06	RP23-447L15.3
ENSMUSG00000073633.9	39.5808	-0.106255	0.390807	0.767312	0.857672	Fbxo36
ENSMUSG00000026220.6	9.47586	0.00399036	0.652514	0.995592	0.997082	Slc16a14
ENSMUSG00000099693.1	13.2891	5.99046	1.41641	1.51132e-05	6.73118e-05	Gm29284
ENSMUSG00000052477.15	120.897	7.69759	0.728297	2.11027e-25	4.00208e-24	C130026I21Rik
ENSMUSG00000064281.7	16.7406	0.0222722	0.538059	0.962771	0.977534	Rpl19-ps1
ENSMUSG00000101279.1	20.2508	4.93371	0.875028	4.30706e-09	2.97054e-08	Gm18342
ENSMUSG00000089844.7	51.6648	4.14423	0.459257	2.98259e-20	4.58519e-19	A530032D15Rik
ENSMUSG00000073631.2	9.3874	7.38702	2.70996	3.35782e-06	1.63476e-05	Gm10553
ENSMUSG00000072109.11	717.708	8.79241	0.423801	2.08724e-94	1.4309e-92	A530040E14Rik
ENSMUSG00000089716.7	415.742	6.88745	0.306503	9.8074e-112	8.13134e-110	Gm6264
ENSMUSG00000090252.1	22.798	9.0302	2.78989	5.91197e-09	3.99645e-08	Gm16028
ENSMUSG00000079455.9	600.972	10.9842	0.97154	1.45339e-27	2.9619e-26	Gm16026
ENSMUSG00000101751.1	38.5959	3.45496	0.48603	1.55001e-13	1.61763e-12	Gm2427
ENSMUSG00000089714.1	6.46757	6.59594	2.71208	3.87795e-05	0.000162392	Gm16092
ENSMUSG00000070034.13	981.474	9.24445	0.420682	1.04871e-105	8.0738e-104	Sp110
ENSMUSG00000090103.1	28.7094	9.41619	2.81672	1.04571e-09	7.69936e-09	Gm16094
ENSMUSG00000070031.11	262.145	5.47805	0.265308	2.6624e-95	1.85803e-93	Sp140
ENSMUSG00000073628.5	123.633	9.48799	1.30243	2.82302e-12	2.64204e-11	Gm10552
ENSMUSG00000090246.1	13.8815	8.11941	2.73184	2.22809e-07	1.261e-06	Gm17017
ENSMUSG00000026222.16	5.6717	-0.306656	0.780148	0.558128	0.699055	Sp100
ENSMUSG00000052760.16	6.29322	0.175163	0.729953	0.735517	0.83576	A630001G21Rik
ENSMUSG00000036707.16	4070.73	2.17907	0.0572391	0	0	Cab39
ENSMUSG00000026223.15	293.918	-0.0756057	0.15655	0.624629	0.752624	Itm2c
ENSMUSG00000099342.1	76.8544	0.145623	0.300408	0.612089	0.743805	Gm18180
ENSMUSG00000026229.17	2598.25	-0.124109	0.0636749	0.0506604	0.108628	Psmd1
ENSMUSG00000026228.6	10.8398	0.177469	0.622787	0.721	0.825598	Htr2b
ENSMUSG00000103272.1	13.3314	0.528194	0.607489	0.283932	0.434669	RP24-308M3.2
ENSMUSG00000062590.13	214.309	0.297742	0.177415	0.0884974	0.172956	Armc9
ENSMUSG00000079445.3	244.12	0.569709	0.173337	0.000854933	0.00284552	B3gnt7
ENSMUSG00000026234.12	22752.6	0.145754	0.0419098	0.000501579	0.00173337	Ncl
ENSMUSG00000073627.7	9.43538	-0.399923	0.68509	0.441601	0.59571	C130036L24Rik
ENSMUSG00000026238.14	17970.4	-0.242169	0.0491626	8.14806e-07	4.298e-06	Ptma
ENSMUSG00000026239.14	190.343	1.11214	0.191615	3.26598e-09	2.28254e-08	Pde6d
ENSMUSG00000102927.1	6.04934	0.0452013	0.730801	0.931413	0.959606	RP23-11K8.3
ENSMUSG00000026240.12	368.139	-0.252831	0.141202	0.0706263	0.143554	Cops7b
ENSMUSG00000053333.15	278.285	0.0766028	0.167823	0.659691	0.780566	Dis3l2
ENSMUSG00000084106.4	936.095	-0.212745	0.098782	0.0305589	0.0701624	Gm6136
ENSMUSG00000026246.12	98.2973	6.2546	0.533628	5.14337e-32	1.21839e-30	Alppl2
ENSMUSG00000026247.13	98.0934	3.7464	0.314582	1.18602e-33	2.93869e-32	Ecel1
ENSMUSG00000026251.13	9.09876	0.700297	0.73438	0.196534	0.328392	Chrnd
ENSMUSG00000026254.17	1554.63	-0.150281	0.0804296	0.0606184	0.126281	Eif4e2
ENSMUSG00000026255.15	17.8561	-0.424713	0.551789	0.363655	0.520467	Efhd1
ENSMUSG00000048000.15	1942.14	-0.115229	0.0723485	0.110416	0.207757	Gigyf2
ENSMUSG00000079436.3	2.71105	0.00175236	0.852337	0.998526	NA	Kcnj13
ENSMUSG00000026259.14	28.6918	3.6209	0.576234	4.45299e-11	3.73831e-10	Ngef
ENSMUSG00000026288.14	1612.13	-0.24711	0.0760812	0.00112321	0.00365261	Inpp5d
ENSMUSG00000026289.15	1194.06	0.359137	0.0827857	1.35471e-05	6.07273e-05	Atg16l1
ENSMUSG00000087968.1	3.35094	0.0448441	0.826045	0.928498	0.958078	Gm25395
ENSMUSG00000056055.13	10.9282	-0.216296	0.638287	0.662927	0.782659	Sag
ENSMUSG00000070738.10	792.494	0.109656	0.100798	0.274967	0.424293	Dgkd
ENSMUSG00000005501.14	206.789	-0.121286	0.188869	0.511783	0.659478	Usp40
ENSMUSG00000081984.3	14.5148	2.77711	0.768168	3.93576e-05	0.000164635	Dnajb3
ENSMUSG00000079429.9	250.632	0.0291034	0.167008	0.863015	0.919025	Mroh2a
ENSMUSG00000044783.16	2600.78	0.467981	0.0676732	4.35029e-12	4.0095e-11	Hjurp
ENSMUSG00000049866.12	17.6519	0.451891	0.539864	0.325055	0.480451	Arl4c
ENSMUSG00000097398.2	4.98153	-0.312919	0.803361	0.545936	0.689418	2410088K16Rik
ENSMUSG00000036206.12	948.905	2.87474	0.0998626	6.39227e-183	8.49427e-181	Sh3bp4
ENSMUSG00000102700.1	49.2186	-1.52917	0.415297	8.01628e-05	0.000317915	RP24-396E16.1
ENSMUSG00000055013.16	278.058	-0.0373523	0.161731	0.814505	0.88765	Agap1
ENSMUSG00000104114.1	1.71881	-0.666691	1.22156	0.132423	NA	RP23-102K8.1
ENSMUSG00000034486.8	16.7967	0.957959	0.593054	0.0527754	0.112491	Gbx2
ENSMUSG00000092627.2	2.58862	-0.0331537	0.868112	0.941035	NA	D130058E05Rik
ENSMUSG00000026301.16	10.1559	-0.595307	0.72554	0.267415	0.415614	Iqca
ENSMUSG00000044337.5	43.5064	-0.0298127	0.371436	0.930092	0.958957	Ackr3
ENSMUSG00000103292.1	6.02108	-1.3343	1.17967	0.0672284	0.137676	RP24-393L8.1
ENSMUSG00000034432.11	807.723	-0.153405	0.0993449	0.120547	0.223333	Cops8
ENSMUSG00000026304.13	5.43971	-1.11366	1.13164	0.0989516	0.189643	Rab17
ENSMUSG00000026305.15	93.274	-0.703532	0.278989	0.008757	0.0232956	Lrrfip1
ENSMUSG00000070732.2	102.923	0.0639921	0.253546	0.795378	0.875583	Rbm44
ENSMUSG00000034353.14	8.3603	7.1337	2.7041	7.45052e-06	3.46388e-05	Ramp1
ENSMUSG00000034343.14	326.094	-0.386426	0.149087	0.0087166	0.0232072	Ube2f
ENSMUSG00000083064.1	27.0547	0.0686229	0.461839	0.868776	0.92247	Gm7785
ENSMUSG00000026307.12	117.845	0.0307866	0.248888	0.89968	0.940649	Scly
ENSMUSG00000049515.12	11.7696	-0.319307	0.627431	0.523079	0.669322	Espnl
ENSMUSG00000026308.8	2.71754	-0.0778777	0.860229	0.867283	NA	Klhl30
ENSMUSG00000047443.14	23.676	3.27061	0.611218	1.05271e-08	6.92559e-08	Fam132b
ENSMUSG00000026309.14	345.564	-0.517619	0.147157	0.000372842	0.00131878	Ilkap
ENSMUSG00000067071.8	70.1135	-0.202918	0.299875	0.478426	0.629028	Hes6
ENSMUSG00000055866.9	9.6919	-0.287074	0.663911	0.573386	0.711058	Per2
ENSMUSG00000034292.13	334.831	0.387304	0.150186	0.00902542	0.0239341	Traf3ip1
ENSMUSG00000026311.16	236.93	-0.588844	0.177334	0.000744829	0.0025018	Asb1
ENSMUSG00000026313.16	363.15	0.841065	0.142476	2.43653e-09	1.72901e-08	Hdac4
ENSMUSG00000026260.12	762.183	0.156132	0.101382	0.121925	0.225454	Ndufa10
ENSMUSG00000073616.10	183.923	-0.305084	0.193586	0.108509	0.204824	Myeov2
ENSMUSG00000034220.7	126.18	0.265285	0.226803	0.23005	0.37212	Gpc1
ENSMUSG00000034212.14	6.81651	0.358004	0.733961	0.494093	0.643506	Ankmy1
ENSMUSG00000047067.7	61.9835	2.37628	0.3478	1.50555e-12	1.43887e-11	Dusp28
ENSMUSG00000097251.2	6.00908	0.550738	0.801653	0.312184	0.466508	5033417F24Rik
ENSMUSG00000026269.14	235.586	-0.155681	0.172124	0.358369	0.515429	Rnpepl1
ENSMUSG00000026270.11	161.117	-0.235031	0.208282	0.249232	0.395051	Capn10
ENSMUSG00000026271.15	4.30303	-0.210116	0.805528	0.679183	0.795463	Gpr35
ENSMUSG00000014602.15	44.6956	1.53155	0.386497	2.25168e-05	9.77948e-05	Kif1a
ENSMUSG00000047793.13	24.591	0.0626586	0.464882	0.881006	0.929521	Sned1
ENSMUSG00000026273.13	221.382	0.405504	0.176307	0.0194955	0.0474578	Mterf4
ENSMUSG00000101172.1	4.52952	0.390021	0.834362	0.452772	0.606478	Gm28535
ENSMUSG00000100351.1	5.60878	-0.247027	0.764935	0.63257	0.758448	Gm7867
ENSMUSG00000026274.11	552.143	0.328439	0.115208	0.00413442	0.0119079	Pask
ENSMUSG00000026275.13	731.215	-0.284801	0.103241	0.00552479	0.0154358	Ppp1r7
ENSMUSG00000034107.10	3.6936	-0.112605	0.829167	0.818117	0.889453	Ano7
ENSMUSG00000034088.15	5264.01	-0.0430889	0.0521302	0.407605	0.562852	Hdlbp
ENSMUSG00000090489.3	6.08982	0.573911	0.824557	0.298278	0.450833	Gm17415
ENSMUSG00000026276.20	56.0867	-0.191004	0.345465	0.554456	0.695833	2023-09-02
ENSMUSG00000034066.13	46.5319	-0.152557	0.358451	0.648512	0.771651	Farp2
ENSMUSG00000026277.14	796.677	-0.248035	0.109591	0.0225735	0.0540676	Stk25
ENSMUSG00000026278.14	26.1327	-0.0415222	0.456336	0.917381	0.951059	Bok
ENSMUSG00000026279.14	202.324	0.00148266	0.183316	0.99441	0.996207	Thap4
ENSMUSG00000101952.1	2.8325	0.133373	0.864277	0.778839	NA	Gm10550
ENSMUSG00000026280.17	728.744	-0.190859	0.10362	0.0638368	0.131867	Atg4b
ENSMUSG00000026281.15	1084.78	-1.14781	0.0947406	5.04766e-34	1.26688e-32	Dtymk
ENSMUSG00000026283.13	925.627	-0.663715	0.095499	2.86197e-12	2.67719e-11	Ing5
ENSMUSG00000073609.9	51.6671	0.987544	0.367618	0.0039861	0.0115252	D2hgdh
ENSMUSG00000094651.2	10.0734	3.11752	0.965402	0.0001422	0.000539676	Gal3st2
ENSMUSG00000101660.1	13.1501	1.97913	0.760753	0.00164988	0.00518706	Gm18666
ENSMUSG00000093805.7	13.3658	1.61238	0.719467	0.0058377	0.0162283	Gm9994
ENSMUSG00000099624.1	20.7488	3.8411	0.710637	8.81096e-09	5.85616e-08	Gm7889
ENSMUSG00000073608.4	74.0404	6.42067	0.63665	7.97206e-24	1.42549e-22	Gm6086
ENSMUSG00000026285.7	10.9662	7.69579	2.72156	1.21256e-06	6.23504e-06	Pdcd1
ENSMUSG00000100347.1	65.6041	-0.29557	0.313113	0.320934	0.476036	Gm7895
ENSMUSG00000051185.9	72.1054	0.489897	0.314463	0.0997148	0.19088	Fam174a
ENSMUSG00000081051.4	1593.93	0.0286988	0.0770781	0.709265	0.817059	Gm15427
ENSMUSG00000040693.7	146.624	-1.23049	0.234362	6.94571e-08	4.14499e-07	Slco4c1
ENSMUSG00000097814.5	86.4794	-1.56401	0.320466	3.36813e-07	1.86381e-06	Panct2
ENSMUSG00000100454.1	2.16554	-0.0948297	0.885532	0.830015	NA	Gm28901
ENSMUSG00000044757.7	424.831	-0.128664	0.131299	0.322364	0.477376	Gm6430
ENSMUSG00000044768.16	48.115	0.522492	0.353835	0.114479	0.213867	D1Ertd622e
ENSMUSG00000040648.14	677.973	-0.607777	0.109779	2.4726e-08	1.55397e-07	Ppip5k2
ENSMUSG00000026333.14	124.721	-0.754453	0.240542	0.00121998	0.00394087	Gin1
ENSMUSG00000026335.16	77.0432	-0.839631	0.313781	0.00473656	0.0134505	Pam
ENSMUSG00000089782.1	92.7842	-0.690694	0.278085	0.00972564	0.0255951	Gm3531
ENSMUSG00000089706.7	1.48627	-0.560845	1.15425	0.178332	NA	B230216N24Rik
ENSMUSG00000089791.1	29.7155	0.534221	0.43912	0.177496	0.303562	Gm3555
ENSMUSG00000100009.6	10.7536	3.51962	1.02416	7.16239e-05	0.00028728	Gm7967
ENSMUSG00000082431.3	9.88771	0.370054	0.656157	0.467273	0.619529	Tdpx-ps1
ENSMUSG00000050840.8	4.20336	1.94293	1.52711	0.0213977	0.0515313	Cdh20
ENSMUSG00000047496.6	15.6607	0.316969	0.559637	0.500774	0.649868	Rnf152
ENSMUSG00000067017.5	898.724	-0.645436	0.0977177	3.08304e-11	2.62688e-10	Gm3608
ENSMUSG00000056536.14	610.898	1.91943	0.112679	1.20614e-65	5.76365e-64	Pign
ENSMUSG00000101219.1	16.8708	5.05365	0.986323	9.36637e-08	5.51828e-07	Gm20302
ENSMUSG00000026319.13	975.827	0.236671	0.0923894	0.0100468	0.0263403	2310035C23Rik
ENSMUSG00000104044.1	1.66106	-0.295576	0.964701	0.491875	NA	RP24-283P23.1
ENSMUSG00000101330.1	3.24039	-0.488285	0.945857	0.35001	0.506758	Gm10193
ENSMUSG00000026321.7	9.59708	0.758438	0.733285	0.163782	0.285236	Tnfrsf11a
ENSMUSG00000099843.1	8.5296	0.346306	0.685556	0.50169	0.650708	Gm7160
ENSMUSG00000038866.15	348.35	0.228495	0.141122	0.102164	0.19476	Zcchc2
ENSMUSG00000044340.7	219.915	0.356901	0.175775	0.0393329	0.0874812	Phlpp1
ENSMUSG00000103291.1	2.7644	0.053675	0.85459	0.909638	NA	RP24-92A2.1
ENSMUSG00000009905.5	369.053	-0.376269	0.140678	0.00690443	0.0188163	Kdsr
ENSMUSG00000009907.17	1160.4	-0.256507	0.0879561	0.00339134	0.0100008	Vps4b
ENSMUSG00000026315.13	3.62936	0.200704	0.828198	0.689407	0.802881	Serpinb8
ENSMUSG00000100041.1	8.64027	-0.216855	0.679166	0.669364	0.787196	Gm5702
ENSMUSG00000102728.1	3.67523	0.462691	0.889918	0.378199	0.534915	RP23-4E15.1
ENSMUSG00000038702.6	153.871	0.838212	0.20967	4.25166e-05	0.000176972	Dsel
ENSMUSG00000097648.1	16.6946	0.525343	0.564543	0.265852	0.413781	9330185C12Rik
ENSMUSG00000102030.1	12.3092	-1.92268	0.931885	0.00857187	0.0228595	Gm29106
ENSMUSG00000026374.14	1347.07	-0.358706	0.0820601	1.14453e-05	5.17843e-05	Tsn
ENSMUSG00000026377.12	1231.73	-0.282708	0.0835622	0.000679075	0.00230328	Nifk
ENSMUSG00000064302.13	983.671	0.828998	0.0898755	2.03101e-20	3.1675e-19	Clasp1
ENSMUSG00000026380.10	6583.62	-0.906975	0.0504256	1.56966e-72	8.4124e-71	Tfcp2l1
ENSMUSG00000089601.1	3.40221	-0.132925	0.837646	0.781494	0.86604	Gm22094
ENSMUSG00000101624.1	6.35845	-0.16439	0.731689	0.747282	0.843792	Gm28882
ENSMUSG00000048402.14	338.075	0.17278	0.147465	0.236291	0.379636	Gli2
ENSMUSG00000037035.5	5.04709	-0.998386	1.09331	0.122759	0.226693	Inhbb
ENSMUSG00000004451.14	480.382	-1.81932	0.142465	6.44127e-38	1.79036e-36	Ralb
ENSMUSG00000098447.2	4.29038	-0.201475	0.805259	0.690731	0.804037	Gm27184
ENSMUSG00000098923.1	210.882	-0.712164	0.1873	0.000108544	0.000420584	Tmem185b
ENSMUSG00000101731.1	4.95909	0.328332	0.796317	0.530563	0.675867	3830432H09Rik
ENSMUSG00000026383.14	302.319	0.06734	0.153204	0.65759	0.779279	Epb4.1l5
ENSMUSG00000026384.13	526.066	-0.278665	0.123561	0.0229923	0.0548946	Ptpn4
ENSMUSG00000091876.1	8.25558	0.0237816	0.677129	0.964338	0.977999	Gm3851
ENSMUSG00000103146.1	4.48882	0.325199	0.813729	0.529381	0.674849	RP23-274C16.4
ENSMUSG00000036975.5	110.456	0.134814	0.244078	0.56971	0.708386	Tmem177
ENSMUSG00000050777.7	10.453	-1.01103	0.799754	0.0895339	0.174665	Tmem37
ENSMUSG00000026385.16	566.869	-0.273597	0.118249	0.0197314	0.047953	Dbi
ENSMUSG00000026388.15	19.7189	-0.536141	0.54295	0.245506	0.390356	3110009E18Rik
ENSMUSG00000026389.16	134.392	-1.95602	0.267751	7.09095e-14	7.60904e-13	Steap3
ENSMUSG00000003721.14	235.207	-0.293447	0.174494	0.0876685	0.1717	Insig2
ENSMUSG00000104253.1	4.99859	-0.626222	0.905889	0.266894	0.415037	RP24-98O21.4
ENSMUSG00000026339.18	583.424	-0.643744	0.11832	4.27614e-08	2.61688e-07	Ccdc93
ENSMUSG00000001674.11	1756.13	0.107923	0.0732893	0.140019	0.25209	Ddx18
ENSMUSG00000026341.16	2558.6	-0.269355	0.0643827	2.74956e-05	0.000117861	Actr3
ENSMUSG00000026342.10	149.016	-0.75149	0.222298	0.000520796	0.00179626	Slc35f5
ENSMUSG00000049690.15	6.63654	0.0723234	0.727691	0.888337	0.933924	Nckap5
ENSMUSG00000036155.13	353.099	-0.875799	0.14903	2.71602e-09	1.91683e-08	Mgat5
ENSMUSG00000099471.1	161.203	-0.443215	0.20825	0.029562	0.0682369	Gm8451
ENSMUSG00000026347.13	25.8267	2.36652	0.576892	5.72048e-06	2.70032e-05	Tmem163
ENSMUSG00000026348.7	4.71521	0.178731	0.779625	0.727777	0.830028	Acmsd
ENSMUSG00000102014.1	2.48598	-0.117253	0.88707	0.78949	NA	2900009J06Rik
ENSMUSG00000026349.14	1936.72	0.193883	0.0708769	0.00608832	0.0168478	Ccnt2
ENSMUSG00000036104.12	658.393	-0.132137	0.10703	0.213965	0.351017	Rab3gap1
ENSMUSG00000036086.16	355.74	-0.560419	0.147527	0.000119672	0.000460392	Zranb3
ENSMUSG00000099760.1	2.22978	-0.488103	1.01477	0.312446	NA	Gm28800
ENSMUSG00000104164.1	26.924	-0.682764	0.487328	0.11217	0.210465	RP24-338G10.1
ENSMUSG00000058603.10	134.378	0.504818	0.239017	0.029941	0.0689889	Rpl28-ps1
ENSMUSG00000102782.1	12.653	-0.120701	0.59428	0.801592	0.879869	RP23-264E23.2
ENSMUSG00000103999.1	5.13235	-0.347651	0.80696	0.505703	0.65457	RP23-264E23.1
ENSMUSG00000056211.13	1143.88	0.0199142	0.0855234	0.815572	0.888378	R3hdm1
ENSMUSG00000104239.1	3.17042	0.494587	0.928827	0.338871	0.494913	RP23-114N13.2
ENSMUSG00000102179.1	2.8051	0.116279	0.872856	0.798887	NA	RP23-114N13.3
ENSMUSG00000026353.9	876.846	-0.0395958	0.0953836	0.676156	0.792778	Ubxn4
ENSMUSG00000026354.8	3.97169	0.176118	0.806099	0.727235	0.829565	Lct
ENSMUSG00000026355.11	2886.63	-0.961874	0.0652647	2.03888e-49	7.44527e-48	Mcm6
ENSMUSG00000026356.15	1688.88	-0.181376	0.073821	0.013716	0.0347213	Dars
ENSMUSG00000100078.1	312.938	-0.139319	0.161573	0.382729	0.539318	Gm6170
ENSMUSG00000045382.6	13.3318	0.952068	0.66379	0.0713098	0.144711	Cxcr4
ENSMUSG00000042581.14	7.40195	2.77396	1.16278	0.00187891	0.00583618	Thsd7b
ENSMUSG00000094122.1	256.654	-0.043706	0.164949	0.78761	0.870431	Rpl31-ps9
ENSMUSG00000026401.15	2.38676	-0.456432	0.995535	0.321849	NA	Daf2
ENSMUSG00000087691.1	6.00402	-0.830278	0.946359	0.166363	0.288798	Gm15674
ENSMUSG00000086825.1	12.7725	-0.960158	0.730055	0.090075	0.175492	Gm15675
ENSMUSG00000026399.12	380.493	-0.604751	0.142665	1.79918e-05	7.92956e-05	Cd55
ENSMUSG00000026409.14	202.161	-1.04414	0.197819	7.19625e-08	4.28923e-07	Pfkfb2
ENSMUSG00000046404.5	209.522	0.569442	0.186943	0.00194223	0.00601552	Yod1
ENSMUSG00000042510.7	48.5035	2.16049	0.392509	6.3146e-09	4.26269e-08	AA986860
ENSMUSG00000016528.10	254.449	0.553799	0.164568	0.000635822	0.00216414	Mapkapk2
ENSMUSG00000102856.1	6.70584	1.51719	1.02515	0.0278456	0.064745	RP23-122P5.3
ENSMUSG00000016526.8	689.393	1.70025	0.109735	1.15271e-54	4.60158e-53	Dyrk3
ENSMUSG00000026427.16	870.238	0.372808	0.0982721	0.000139395	0.000529443	Eif2d
ENSMUSG00000026430.16	32.4988	0.623303	0.443558	0.119492	0.221737	Rassf5
ENSMUSG00000042349.13	19.4457	-0.226547	0.530148	0.61435	0.745058	Ikbke
ENSMUSG00000026425.15	711.279	-0.468208	0.106249	9.25532e-06	4.23796e-05	Srgap2
ENSMUSG00000101778.1	4.5688	-0.0531164	0.780851	0.914587	0.949075	Gm29488
ENSMUSG00000055184.4	93.7313	0.827633	0.261956	0.00104086	0.00340543	Fam72a
ENSMUSG00000042268.10	5.23773	-0.0422739	0.770699	0.930896	0.959302	Slc26a9
ENSMUSG00000042251.12	38.2906	-0.698787	0.418311	0.0667955	0.13699	Pm20d1
ENSMUSG00000013275.9	523.659	0.552788	0.11694	1.92196e-06	9.61032e-06	Slc41a1
ENSMUSG00000026433.13	43.7227	-1.10053	0.420691	0.00429629	0.0123193	Rab29
ENSMUSG00000026434.12	3913.27	-0.814582	0.058837	8.99745e-44	2.89966e-42	Nucks1
ENSMUSG00000103569.1	38.7339	0.283491	0.384008	0.425842	0.580436	RP24-325N3.3
ENSMUSG00000026435.15	60.2609	0.492486	0.329858	0.112997	0.211547	Slc45a3
ENSMUSG00000026436.15	195.213	0.0295517	0.185964	0.872751	0.924754	Elk4
ENSMUSG00000059149.17	86.9208	-0.172306	0.272107	0.510191	0.658175	Mfsd4
ENSMUSG00000103966.1	6.70859	-0.429357	0.782318	0.420599	0.575421	RP24-340N18.1
ENSMUSG00000026437.11	177.431	1.02923	0.198423	1.16721e-07	6.79745e-07	Cdk18
ENSMUSG00000079330.9	12.3271	1.74763	0.784381	0.00528102	0.0148209	Lemd1
ENSMUSG00000118219.1	11.0795	0.113987	0.631486	0.819015	0.889781	NA
ENSMUSG00000101549.1	16.4544	0.982741	0.604991	0.0504071	0.108168	Gm29630
ENSMUSG00000009772.15	78.7008	2.01004	0.303621	8.15127e-12	7.31465e-11	Nuak2
ENSMUSG00000042066.16	66.8074	0.131827	0.309034	0.655422	0.777347	Tmcc2
ENSMUSG00000042046.15	289.71	-0.175804	0.158434	0.260202	0.407257	Dstyk
ENSMUSG00000097760.2	12.4198	-1.29851	0.805417	0.0355627	0.0801431	6030442K20Rik
ENSMUSG00000026439.14	1205.53	0.0916814	0.0828042	0.267748	0.415966	Rbbp5
ENSMUSG00000048174.2	37.8991	-0.075128	0.410141	0.839215	0.903229	Tmem81
ENSMUSG00000053024.14	63.6557	-0.0432263	0.311436	0.883021	0.930461	Cntn2
ENSMUSG00000026442.14	103.104	0.999647	0.251157	3.84969e-05	0.000161383	Nfasc
ENSMUSG00000026443.3	8.29705	0.407974	0.70023	0.43323	0.58781	Lrrn2
ENSMUSG00000102709.1	5.34245	0.21316	0.764476	0.680982	0.796415	RP23-393D20.1
ENSMUSG00000054387.13	2734.68	-0.707239	0.0651012	1.2848e-27	2.62383e-26	Mdm4
ENSMUSG00000100228.1	16.2797	1.46539	0.643431	0.00630397	0.0173726	Gm29257
ENSMUSG00000026447.17	99.848	0.714691	0.261759	0.00468076	0.0133096	Pik3c2b
ENSMUSG00000102425.1	7.04465	0.532411	0.787086	0.326227	0.481706	RP23-304O9.1
ENSMUSG00000046062.5	2705.66	-0.0959137	0.0629352	0.126575	0.23248	Ppp1r15b
ENSMUSG00000041757.17	56.4686	0.608693	0.335825	0.0545411	0.115696	Plekha6
ENSMUSG00000115958.1	3.46688	0.160805	0.836122	0.741302	0.839791	NA
ENSMUSG00000070645.5	2.89157	-0.384332	0.921934	0.440475	NA	Ren1
ENSMUSG00000070644.13	23.3981	-0.569541	0.515426	0.201963	0.335556	Etnk2
ENSMUSG00000070643.11	76.8908	0.725592	0.28683	0.00814557	0.0218548	Sox13
ENSMUSG00000090553.8	1105.86	-0.228647	0.0865908	0.00803679	0.0215928	Snrpe
ENSMUSG00000102976.6	347.781	0.0537714	0.148943	0.716277	0.822327	Zc3h11a
ENSMUSG00000094410.8	1556.43	0.705308	0.0762821	1.72947e-20	2.70374e-19	Zbed6
ENSMUSG00000051998.14	33.447	-1.32725	0.489557	0.00261631	0.00790515	Lax1
ENSMUSG00000026463.17	348.627	-0.297198	0.146717	0.0404876	0.0896485	Atp2b4
ENSMUSG00000020423.6	795.383	2.5142	0.10705	1.39134e-122	1.24969e-120	Btg2
ENSMUSG00000026450.14	3.0547	-0.283518	0.894364	0.547981	NA	Chit1
ENSMUSG00000064246.10	3.72782	0.0100683	0.808032	0.985357	0.99077	Chil1
ENSMUSG00000042451.12	1.60254	-0.61304	1.18583	0.153399	NA	Mybph
ENSMUSG00000026458.13	254.658	-0.446802	0.168968	0.00669789	0.0183332	Ppfia4
ENSMUSG00000042305.12	1386.49	-0.280599	0.0839183	0.000795548	0.00266111	Tmem183a
ENSMUSG00000026456.18	777.275	-0.78899	0.104846	3.89562e-14	4.26277e-13	Cyb5r1
ENSMUSG00000026457.14	1057.07	-0.324068	0.0941613	0.00055271	0.00189891	Adipor1
ENSMUSG00000101061.1	9.9778	-0.292554	0.66757	0.565932	0.705103	Gm29643
ENSMUSG00000102722.1	3.00135	-0.348031	0.903965	0.477929	NA	RP24-547I3.2
ENSMUSG00000026455.14	719.352	0.00965323	0.103209	0.925823	0.956285	Klhl12
ENSMUSG00000042229.9	511.968	-0.484351	0.121813	6.13431e-05	0.000248927	Rabif
ENSMUSG00000096712.1	170.184	-0.130467	0.198697	0.502336	0.651328	Gm15454
ENSMUSG00000046367.10	5.8488	-0.452588	0.822074	0.396033	0.551575	Mgat4e
ENSMUSG00000042207.17	6835.15	1.02688	0.0491503	3.49931e-97	2.46873e-95	Kdm5b
ENSMUSG00000097435.1	4.92939	0.745584	0.916569	0.193185	0.323939	Gm26783
ENSMUSG00000026452.15	22.899	3.43612	0.63953	9.50858e-09	6.29181e-08	Syt2
ENSMUSG00000073557.12	231.495	0.441998	0.178729	0.011865	0.0305701	Ppp1r12b
ENSMUSG00000103614.1	3.47821	0.452994	0.899291	0.378153	0.534915	RP24-541A5.3
ENSMUSG00000103976.1	15.1487	0.132427	0.560427	0.778226	0.864042	RP24-541A5.1
ENSMUSG00000026429.9	899.79	1.75179	0.0997219	1.40555e-69	7.17608e-68	Ube2t
ENSMUSG00000042793.13	8.00114	0.0708295	0.677745	0.890496	0.93523	Lgr6
ENSMUSG00000097993.7	83.0173	-1.59196	0.335236	6.05594e-07	3.24741e-06	Ptprv
ENSMUSG00000031506.11	11.9149	-0.364812	0.638745	0.466605	0.618982	Ptpn7
ENSMUSG00000026426.10	439.046	-0.294155	0.131402	0.0239576	0.0569053	Arl8a
ENSMUSG00000087721.1	5.87014	0.144635	0.737243	0.779097	0.864725	Gm26280
ENSMUSG00000079139.4	484.601	0.0896669	0.128685	0.482602	0.633011	Gm4204
ENSMUSG00000097680.1	3.36931	-0.511235	0.960398	0.329183	0.484743	Gm26642
ENSMUSG00000003051.13	806.898	0.443571	0.0996718	7.79582e-06	3.60971e-05	Elf3
ENSMUSG00000041926.15	207.812	-0.0444273	0.182445	0.80346	0.881148	Rnpep
ENSMUSG00000062580.9	1111.84	-0.246294	0.0913865	0.00674268	0.0184376	Timm17a
ENSMUSG00000048096.7	32.3254	4.02869	0.576451	3.99555e-13	4.05003e-12	Lmod1
ENSMUSG00000041889.7	7.80962	0.0600031	0.681249	0.907856	0.945767	Shisa4
ENSMUSG00000041879.13	1171.35	-0.291607	0.0868407	0.000743334	0.00249851	Ipo9
ENSMUSG00000009418.16	703.125	1.10886	0.107578	3.55514e-25	6.67052e-24	Nav1
ENSMUSG00000054412.5	3.60582	0.782137	1.03674	0.169845	0.293373	Gm4793
ENSMUSG00000026421.14	661.412	-1.30691	0.116935	2.5746e-29	5.51932e-28	Csrp1
ENSMUSG00000041801.5	607.388	0.250059	0.114316	0.0278933	0.0648326	Phlda3
ENSMUSG00000026418.16	9.11933	-0.460357	0.728014	0.385228	0.541777	Tnni1
ENSMUSG00000041782.14	8.95895	-0.486316	0.715564	0.359973	0.516862	Lad1
ENSMUSG00000026414.13	3.33961	-0.190908	0.844789	0.69638	0.808042	Tnnt2
ENSMUSG00000026411.17	305.385	0.419565	0.149174	0.00444602	0.0126905	Tmem9
ENSMUSG00000026407.17	2065.76	8.71628	0.24525	1.22689e-275	2.26694e-273	Cacna1s
ENSMUSG00000102717.1	108.089	7.54477	0.733596	3.5664e-24	6.49077e-23	RP23-211F21.1
ENSMUSG00000086264.9	18.6117	6.5393	1.38042	2.01949e-06	1.00746e-05	Gm15850
ENSMUSG00000041642.18	268.251	0.284095	0.16432	0.0802488	0.159683	Kif21b
ENSMUSG00000087230.10	2.99464	0.314322	0.908966	0.510139	NA	Mroh3
ENSMUSG00000041605.16	35.4586	-0.180325	0.414597	0.633351	0.759058	5730559C18Rik
ENSMUSG00000041570.14	667.374	0.495469	0.105386	2.25548e-06	1.12058e-05	Camsap2
ENSMUSG00000097403.2	4.48762	-0.798033	1.02804	0.180232	0.307077	9230116N13Rik
ENSMUSG00000026404.12	151.285	-0.0722028	0.211062	0.725814	0.828763	Ddx59
ENSMUSG00000041498.13	843.282	1.64576	0.0962974	5.18907e-66	2.4981e-64	Kif14
ENSMUSG00000104509.1	6.71113	0.0772829	0.71412	0.882089	0.930026	RP24-68C1.4
ENSMUSG00000097229.1	19.2415	0.293775	0.521061	0.511572	0.659381	Gm26598
ENSMUSG00000041483.14	1881.16	0.609104	0.0737766	1.24812e-16	1.58994e-15	Zfp281
ENSMUSG00000097113.7	27.7829	-1.03838	0.519394	0.0226529	0.0542311	Gm19705
ENSMUSG00000097448.1	8.58747	-0.821855	0.824177	0.157378	0.276115	Gm16880
ENSMUSG00000103953.1	25.7908	0.156004	0.454871	0.702955	0.812464	RP23-302C16.4
ENSMUSG00000026398.14	1199.51	-0.128301	0.0910459	0.156437	0.274809	Nr5a2
ENSMUSG00000026394.5	6.97854	4.79464	1.57077	0.000546277	0.0018778	Atp6v1g3
ENSMUSG00000026393.10	393.704	-0.11578	0.139016	0.400127	0.555482	Nek7
ENSMUSG00000079283.2	38.3694	0.324493	0.387264	0.364963	0.521709	2310009B15Rik
ENSMUSG00000056268.15	573.543	-0.952493	0.128597	7.41201e-14	7.93162e-13	Dennd1b
ENSMUSG00000104436.1	6.01535	-0.560715	0.833148	0.310158	0.464303	RP23-114L12.3
ENSMUSG00000104900.1	2.46101	-0.247902	0.905496	0.593457	NA	NA
ENSMUSG00000102243.1	2.35222	-0.444783	0.992392	0.330409	NA	RP24-260D21.1
ENSMUSG00000033964.12	482.847	0.114942	0.124521	0.352778	0.509408	Zbtb41
ENSMUSG00000033952.14	1514.6	0.0444222	0.0765247	0.561528	0.701443	Aspm
ENSMUSG00000026368.6	3.75103	-0.233388	0.838132	0.636982	0.762187	F13b
ENSMUSG00000033898.17	15.4603	8.32713	2.74308	1.00577e-07	5.90048e-07	Cfhr2
ENSMUSG00000089991.2	553.231	9.37993	0.586644	3.54489e-56	1.45094e-54	Gm16332
ENSMUSG00000104496.1	756.118	6.25501	0.192443	6.69534e-232	1.08247e-229	RP23-13N24.1
ENSMUSG00000085867.1	139.274	8.81754	0.978595	3.26161e-18	4.56225e-17	Gm5834
ENSMUSG00000026365.15	48.665	3.15269	0.419818	6.81924e-15	7.8563e-14	Cfh
ENSMUSG00000052726.16	17.3076	-0.19994	0.540011	0.661563	0.781953	Kcnt2
ENSMUSG00000102698.1	2.53626	-0.195309	0.894464	0.666253	NA	RP24-351P4.1
ENSMUSG00000101795.2	30.4267	-0.87587	0.475538	0.0391111	0.0870476	Gm5835
ENSMUSG00000026361.9	1180.16	0.386547	0.0891709	1.33919e-05	6.00592e-05	Cdc73
ENSMUSG00000033849.3	17.1687	0.348361	0.551427	0.456599	0.610172	B3galt2
ENSMUSG00000089640.1	29.4457	-0.559221	0.45773	0.172611	0.296934	Gm6397
ENSMUSG00000018196.18	2666.53	4.97754	0.0844428	0	0	Glrx2
ENSMUSG00000018199.9	562.185	0.227879	0.124057	0.0643173	0.132704	Trove2
ENSMUSG00000018189.12	779.315	0.61738	0.10175	1.03405e-09	7.62218e-09	Uchl5
ENSMUSG00000100455.1	87.2541	2.85663	0.302552	4.97002e-22	8.23427e-21	Gm29170
ENSMUSG00000026360.9	6.5031	4.58955	1.62051	0.000912796	0.00302256	Rgs2
ENSMUSG00000090323.2	5.41154	0.201619	0.756688	0.697129	0.808621	Gm5263
ENSMUSG00000035131.14	5.21495	0.902612	1.00844	0.130654	0.238504	Brinp3
ENSMUSG00000080078.2	164.73	-0.36369	0.204981	0.0700279	0.142532	Gm15583
ENSMUSG00000082588.1	5.09857	0.0730648	0.759451	0.887713	0.933571	Gm15443
ENSMUSG00000056220.14	6.78196	0.365181	0.73617	0.486218	0.636298	Pla2g4a
ENSMUSG00000032487.8	46.3176	0.802614	0.384164	0.0234732	0.0558914	Ptgs2
ENSMUSG00000099875.1	11.0917	-0.243851	0.639512	0.62419	0.752401	Gm15453
ENSMUSG00000100690.1	108.723	-0.13484	0.244713	0.569388	0.708077	Gm4322
ENSMUSG00000006010.14	249.687	-0.147964	0.175169	0.390897	0.546974	BC003331
ENSMUSG00000006005.18	6118.06	0.526708	0.0553777	1.60477e-21	2.60102e-20	Tpr
ENSMUSG00000006014.16	8.44171	0.315722	0.684468	0.53998	0.684358	Prg4
ENSMUSG00000066842.18	10.5253	0.596179	0.688618	0.259131	0.406057	Hmcn1
ENSMUSG00000097426.1	4.46572	-0.8077	1.02761	0.177719	0.303802	Gm8941
ENSMUSG00000114212.1	39.6242	6.92091	1.02095	2.86067e-11	2.44708e-10	NA
ENSMUSG00000114943.1	100.595	7.13643	0.670202	6.29788e-26	1.20856e-24	NA
ENSMUSG00000114694.1	207.065	8.49699	0.717595	2.38458e-31	5.49444e-30	NA
ENSMUSG00000114582.1	71.2624	7.82765	0.995257	2.32863e-14	2.5875e-13	NA
ENSMUSG00000114591.1	37.422	6.84565	1.02795	5.74556e-11	4.78822e-10	NA
ENSMUSG00000100954.4	5.08075	-0.0652755	0.765573	0.895378	0.93774	Gm10138
ENSMUSG00000023150.14	2102.82	-0.547553	0.0695185	2.88217e-15	3.3889e-14	Ivns1abp
ENSMUSG00000052748.14	856.009	0.00921226	0.0983331	0.925791	0.956285	Swt1
ENSMUSG00000053286.11	187.262	1.1621	0.190772	5.49155e-10	4.16015e-09	Trmt1l
ENSMUSG00000103928.1	14.6818	0.0257761	0.575755	0.958483	0.974813	RP24-167M10.4
ENSMUSG00000026484.13	1618.99	-0.225295	0.0843965	0.00732556	0.0198607	Rnf2
ENSMUSG00000103238.1	23.2495	-0.275269	0.484501	0.517514	0.664932	RP24-395F2.1
ENSMUSG00000026483.13	311.098	0.174493	0.154166	0.2526	0.398657	Fam129a
ENSMUSG00000100594.1	3.08308	-0.378495	0.907475	0.447496	NA	2810414N06Rik
ENSMUSG00000043019.12	992.902	-0.151051	0.0914557	0.0971928	0.186863	Edem3
ENSMUSG00000032666.16	422.311	3.57405	0.150791	5.536e-125	5.11448e-123	1700025G04Rik
ENSMUSG00000100685.1	14.6302	6.15546	1.4023	8.45875e-06	3.89528e-05	Gm28610
ENSMUSG00000014980.14	164.566	-0.439716	0.206288	0.0294393	0.0679701	Tsen15
ENSMUSG00000032649.14	2.68916	-0.00156289	0.856089	0.995804	NA	Colgalt2
ENSMUSG00000026482.13	13.9639	-0.0622106	0.572242	0.894102	0.936926	Rgl1
ENSMUSG00000080950.1	6.27056	-0.194585	0.736172	0.705106	0.813933	Gm7278
ENSMUSG00000008475.13	668.065	-0.431921	0.11033	8.22766e-05	0.000325566	Arpc5
ENSMUSG00000026480.12	110.558	-0.251073	0.256744	0.310051	0.464216	Ncf2
ENSMUSG00000042772.15	2209.37	-0.451196	0.0675484	2.13164e-11	1.84378e-10	Smg7
ENSMUSG00000100394.1	9.28555	-0.446956	0.714669	0.394289	0.550076	Gm28791
ENSMUSG00000042751.14	270.636	-1.36269	0.184809	6.00948e-14	6.48804e-13	Nmnat2
ENSMUSG00000026479.13	259.392	-0.544822	0.167834	0.000991687	0.00325655	Lamc2
ENSMUSG00000026478.14	3792.78	0.0180112	0.0574241	0.753912	0.848463	Lamc1
ENSMUSG00000103818.1	13.2722	0.360978	0.601962	0.462745	0.615287	RP24-571N3.1
ENSMUSG00000079138.3	6.96765	0.190545	0.712428	0.71349	0.819806	Gm8818
ENSMUSG00000073538.10	159.622	1.6319	0.211538	3.87621e-15	4.52481e-14	E330020D12Rik
ENSMUSG00000042708.12	31.1394	1.37273	0.497404	0.00195458	0.00604799	Shcbp1l
ENSMUSG00000042699.11	5122.65	0.0207274	0.0523704	0.692286	0.805315	Dhx9
ENSMUSG00000042684.8	103.094	0.0446124	0.254665	0.857888	0.915757	Npl
ENSMUSG00000099858.1	41.222	1.85987	0.408994	1.24178e-06	6.37349e-06	Gm6652
ENSMUSG00000026475.7	25.9984	4.57002	0.707719	2.05198e-11	1.77646e-10	Rgs16
ENSMUSG00000066800.11	2.21273	-0.115219	0.885384	0.796204	NA	Rnasel
ENSMUSG00000026473.16	1056.67	1.99538	0.0893881	5.20626e-111	4.22622e-109	Glul
ENSMUSG00000100014.1	32.8133	9.65305	2.83457	3.67814e-10	2.84414e-09	Gm29290
ENSMUSG00000056708.5	91.2671	3.8669	0.330493	1.56367e-32	3.7592e-31	Ier5
ENSMUSG00000026470.14	189.849	0.0190051	0.192648	0.920328	0.953152	Stx6
ENSMUSG00000033722.9	42.315	0.615022	0.378732	0.0798761	0.159121	BC034090
ENSMUSG00000026469.14	331.611	0.0979269	0.149468	0.50793	0.656515	Xpr1
ENSMUSG00000033701.13	229.319	0.411682	0.170286	0.0141336	0.0356481	Acbd6
ENSMUSG00000033684.14	100.894	-0.103682	0.255485	0.673848	0.790981	Qsox1
ENSMUSG00000033671.18	848.263	0.826364	0.100993	1.86105e-16	2.34e-15	Cep350
ENSMUSG00000026466.16	253.99	-0.33861	0.167147	0.0399357	0.0886186	Tor1aip1
ENSMUSG00000102964.1	5.74287	-0.134748	0.749115	0.792257	0.873378	RP24-321N12.1
ENSMUSG00000050565.16	3502.26	-0.114119	0.0580719	0.0490445	0.105677	Tor1aip2
ENSMUSG00000015484.3	13.458	3.43013	0.847332	6.14222e-06	2.88117e-05	Fam163a
ENSMUSG00000060985.15	35.625	2.0478	0.457188	1.34966e-06	6.90165e-06	Tdrd5
ENSMUSG00000026601.14	3.6749	0.734547	1.0149	0.187963	0.317185	Axdnd1
ENSMUSG00000078193.2	590.933	-0.166552	0.113876	0.141232	0.253829	Gm2000
ENSMUSG00000026600.12	356.606	0.393953	0.140145	0.00453434	0.0129217	Soat1
ENSMUSG00000101523.2	1184.56	1.54755	0.0842225	6.51013e-76	3.6326e-74	Csnk2a1
ENSMUSG00000026596.13	1231.79	0.465	0.0824571	1.53532e-08	9.89925e-08	Abl2
ENSMUSG00000104293.1	11.3928	0.115116	0.611685	0.815682	0.888434	RP23-363M8.2
ENSMUSG00000060519.11	76.5269	-0.0251036	0.285712	0.925983	0.956326	Tor3a
ENSMUSG00000033557.17	323.477	-0.437481	0.150126	0.00319776	0.00947028	Fam20b
ENSMUSG00000046057.4	12.0998	-0.782157	0.707206	0.151064	0.26727	Gm15428
ENSMUSG00000026594.14	365.249	0.255576	0.137584	0.0609291	0.126847	Ralgps2
ENSMUSG00000102960.1	4.38905	0.971638	1.0595	0.114319	0.21365	RP24-444I15.4
ENSMUSG00000026592.13	1.71881	-0.666691	1.22156	0.132423	NA	Tex35
ENSMUSG00000070565.11	238.554	0.072879	0.171016	0.665486	0.784249	Rasal2
ENSMUSG00000103808.1	1.96885	-0.317746	0.960206	0.448683	NA	RP24-227F14.1
ENSMUSG00000049881.13	430.79	0.280978	0.127596	0.0264543	0.0620529	2810025M15Rik
ENSMUSG00000033488.11	66.5183	0.0158613	0.306095	0.957984	0.974463	BC026585
ENSMUSG00000026589.14	2.53757	-0.506643	1.01217	0.286956	NA	Sec16b
ENSMUSG00000004031.13	6.07167	0.576158	0.850572	0.290758	0.442223	Brinp2
ENSMUSG00000040782.12	748.882	0.0411787	0.102577	0.687274	0.801214	Rfwd2
ENSMUSG00000103572.1	8.11653	0.753177	0.780497	0.175873	0.301529	RP23-375F6.4
ENSMUSG00000058267.13	347.898	-0.205993	0.145353	0.152134	0.268763	Mrps14
ENSMUSG00000014226.10	2429.38	-0.0664083	0.0678992	0.32583	0.481218	Cacybp
ENSMUSG00000103006.1	6.65997	1.06481	0.922095	0.0841986	0.16612	RP23-71J17.5
ENSMUSG00000026721.16	125.965	-0.564577	0.235768	0.0136729	0.0346258	Rabgap1l
ENSMUSG00000103632.1	2.44396	0.0910626	0.868107	0.844399	NA	RP24-400M20.2
ENSMUSG00000040423.11	779.406	0.662678	0.0986922	1.48722e-11	1.30382e-10	Rc3h1
ENSMUSG00000103739.1	7.86209	0.847924	0.807921	0.137579	0.248618	RP24-188H2.5
ENSMUSG00000026715.12	4.77857	0.832349	0.962842	0.157023	0.275593	Serpinc1
ENSMUSG00000043467.19	260.651	-0.53225	0.167423	0.0012456	0.00401271	Zbtb37
ENSMUSG00000104016.1	4.76681	-0.105583	0.775311	0.834256	0.899288	RP24-297J20.5
ENSMUSG00000053332.13	2677.14	-0.311271	0.0641976	1.18525e-06	6.1011e-06	Gas5
ENSMUSG00000026709.10	389.033	0.220856	0.134174	0.0968492	0.186351	Dars2
ENSMUSG00000026708.16	352.039	0.223604	0.141754	0.111158	0.20889	Cenpl
ENSMUSG00000026705.16	443.327	-0.156351	0.127708	0.217012	0.354906	Klhl20
ENSMUSG00000044835.15	76.644	-0.39861	0.30381	0.167169	0.289747	Ankrd45
ENSMUSG00000049160.15	5.14467	-0.211616	0.807776	0.670396	0.787994	4930469G21Rik
ENSMUSG00000102817.2	11.4445	0.376963	0.642386	0.452514	0.606259	RP23-16I21.1
ENSMUSG00000026701.15	1756.96	0.274654	0.0713886	0.000114971	0.000443538	Prdx6
ENSMUSG00000040323.13	62.7925	0.288128	0.313407	0.333705	0.489469	Gm15429
ENSMUSG00000040297.12	947.928	-0.0292222	0.0924444	0.750413	0.845944	Suco
ENSMUSG00000026698.8	87.9481	0.248749	0.275326	0.347213	0.503609	Pigc
ENSMUSG00000040265.16	8.07044	1.13744	0.865186	0.0632636	0.130878	Dnm3
ENSMUSG00000026694.19	331.976	-0.0131044	0.146029	0.926805	0.956892	Mettl13
ENSMUSG00000026696.15	142.974	0.0773857	0.21455	0.713383	0.819731	Vamp4
ENSMUSG00000040225.15	7534.84	0.667041	0.0485878	6.34492e-43	2.00812e-41	Prrc2c
ENSMUSG00000098259.1	5.63683	-0.1849	0.769483	0.715238	0.821341	Gm27616
ENSMUSG00000040124.5	286.373	0.222505	0.1553	0.146812	0.261125	Gorab
ENSMUSG00000102117.1	2.98518	-1.52586	2.09109	0.0317161	NA	Rpsa-ps1
ENSMUSG00000026585.13	400.652	-0.339227	0.138174	0.013084	0.0332996	Kifap3
ENSMUSG00000026584.14	301.53	0.879529	0.154512	8.20741e-09	5.47565e-08	Scyl3
ENSMUSG00000041406.14	739.326	-0.209432	0.103186	0.0412213	0.0910341	BC055324
ENSMUSG00000041396.13	97.3854	-0.536583	0.265264	0.0358227	0.0806353	Mettl18
ENSMUSG00000026579.8	3.58789	-0.310345	0.864952	0.539602	0.684013	F5
ENSMUSG00000040918.12	809.447	0.0890616	0.0981648	0.362352	0.519279	Slc19a2
ENSMUSG00000026578.6	57.8979	0.060896	0.324906	0.844755	0.906577	Ccdc181
ENSMUSG00000026577.13	560.625	-0.0801639	0.118094	0.493278	0.642935	Blzf1
ENSMUSG00000026575.15	317.921	-0.0663621	0.152891	0.659217	0.780369	Nme7
ENSMUSG00000103493.1	6.63126	-0.708704	0.857618	0.218063	0.356264	RP24-73O16.3
ENSMUSG00000026576.12	1583.55	0.0111503	0.0755863	0.882891	0.930461	Atp1b1
ENSMUSG00000104011.1	2.67651	0.0106135	0.851855	0.983443	NA	RP24-272N10.3
ENSMUSG00000103226.1	1.41718	-0.535117	1.13981	0.193093	NA	RP24-272N10.4
ENSMUSG00000097281.2	3.67061	-0.458429	0.926467	0.366863	0.523886	Gm26685
ENSMUSG00000040848.11	218.788	-0.289993	0.179629	0.100544	0.192239	Sft2d2
ENSMUSG00000040843.10	694.621	0.0360585	0.111806	0.746054	0.842846	Tiprl
ENSMUSG00000102302.1	54.4906	0.821724	0.339169	0.0100285	0.0262957	RP23-187M7.5
ENSMUSG00000040836.15	227.502	2.14168	0.183011	2.11654e-32	5.06324e-31	Gpr161
ENSMUSG00000026571.12	287.404	0.299865	0.15631	0.0519066	0.11092	Dcaf6
ENSMUSG00000102401.1	7.54198	0.711807	0.786949	0.202977	0.337039	RP24-323I23.1
ENSMUSG00000026568.6	195.265	0.984591	0.185367	6.37665e-08	3.82895e-07	Mpc2
ENSMUSG00000103763.1	4.36606	0.464929	0.866648	0.374593	0.531459	RP24-323I23.2
ENSMUSG00000026567.16	16.5487	-0.249752	0.548499	0.589379	0.724942	Adcy10
ENSMUSG00000026566.15	1038.92	0.684359	0.0889439	1.01922e-14	1.16044e-13	Mpzl1
ENSMUSG00000103098.1	5.73605	0.0412352	0.751866	0.936723	0.962521	RP23-469D21.5
ENSMUSG00000040723.14	27.9797	2.27412	0.519265	1.87791e-06	9.40941e-06	Rcsd1
ENSMUSG00000040713.12	175.653	-0.252408	0.20464	0.208252	0.34365	Creg1
ENSMUSG00000005763.15	5.32332	0.300351	0.783892	0.562388	0.70224	Cd247
ENSMUSG00000026565.18	820.636	-0.236105	0.100047	0.0176476	0.0434164	Pou2f1
ENSMUSG00000099008.1	2.48499	-0.00786764	0.866471	0.984881	NA	Gm17976
ENSMUSG00000026564.9	333.12	-1.1944	0.161226	6.69039e-14	7.19513e-13	Dusp27
ENSMUSG00000000544.14	305.168	-1.76474	0.177276	7.16395e-24	1.28692e-22	Gpa33
ENSMUSG00000040629.8	43.6942	0.5533	0.373215	0.110555	0.20797	Mael
ENSMUSG00000026563.13	45.648	0.931275	0.377279	0.00761982	0.0205665	Tada1
ENSMUSG00000040596.15	29.8882	1.25827	0.471937	0.00291961	0.00873318	Pogk
ENSMUSG00000096172.1	35.3339	9.77068	2.84523	2.1675e-10	1.7136e-09	Gm22992
ENSMUSG00000051081.7	25.8703	9.23682	2.80303	2.28447e-09	1.62706e-08	Gm4847
ENSMUSG00000086925.1	5.80678	-0.294592	0.766535	0.572139	0.710177	Gm6286
ENSMUSG00000060568.14	5.17382	0.118903	0.759436	0.816675	0.888638	Fam78b
ENSMUSG00000026558.13	2674.07	-0.264551	0.0627649	2.39839e-05	0.000103702	Uck2
ENSMUSG00000103139.1	3.03589	-0.352179	0.906832	0.472021	NA	RP23-79H24.3
ENSMUSG00000052428.10	383.746	-0.659863	0.140869	2.21036e-06	1.09929e-05	Tmco1
ENSMUSG00000088246.1	92.16	0.293185	0.280682	0.27837	0.428148	Gm25911
ENSMUSG00000026687.14	432.429	0.132003	0.129187	0.30361	0.456933	Aldh9a1
ENSMUSG00000026688.5	68.0167	-0.438862	0.314615	0.141987	0.254969	Mgst3
ENSMUSG00000015843.10	22.955	9.0394	2.78933	5.53586e-09	3.76054e-08	Rxrg
ENSMUSG00000026686.14	1067.63	9.36521	0.420237	9.13531e-109	7.23404e-107	Lmx1a
ENSMUSG00000052534.15	143.238	-0.438001	0.219986	0.0411339	0.0908617	Pbx1
ENSMUSG00000026683.14	576.902	-0.206562	0.118455	0.0791134	0.157812	Nuf2
ENSMUSG00000026675.12	171.218	0.175013	0.198381	0.368957	0.526101	Hsd17b7
ENSMUSG00000026674.9	769.304	4.23113	0.126629	2.40617e-245	4.09492e-243	Ddr2
ENSMUSG00000026670.15	3015.23	3.61979	0.0665537	0	0	Uap1
ENSMUSG00000026667.14	1260.91	-0.0693042	0.082096	0.396756	0.552319	Uhmk1
ENSMUSG00000102752.1	15.353	0.744976	0.604152	0.132641	0.241518	Gm7694
ENSMUSG00000038473.14	12.7613	0.830709	0.656902	0.110824	0.208342	Nos1ap
ENSMUSG00000038463.8	8.78459	-0.190643	0.683061	0.705889	0.814546	Olfml2b
ENSMUSG00000026663.6	639.191	-0.00539305	0.108547	0.95913	0.975113	Atf6
ENSMUSG00000053925.4	14.7006	0.0528686	0.567605	0.912211	0.947957	Gm9929
ENSMUSG00000026659.13	160.283	-0.377654	0.211438	0.0680326	0.139054	Dusp12
ENSMUSG00000089838.1	3.53597	0.142954	0.832503	0.76895	0.858776	Gm2962
ENSMUSG00000026656.15	3.80306	0.0601333	0.816077	0.903258	0.943308	Fcgr2b
ENSMUSG00000026649.14	6.75799	0.177457	0.719012	0.730156	0.832011	1700009P17Rik
ENSMUSG00000058076.12	738.183	-0.254893	0.102548	0.0124418	0.0318659	Sdhc
ENSMUSG00000038370.6	11.9066	3.08405	0.926846	8.56089e-05	0.000337718	Pcp4l1
ENSMUSG00000005674.9	34.5976	-0.450279	0.422184	0.241306	0.385474	Tomm40l
ENSMUSG00000005681.12	134.626	6.33394	0.460695	3.98746e-43	1.26821e-41	Apoa2
ENSMUSG00000058715.11	14.1946	2.13534	0.747119	0.000640269	0.00217851	Fcer1g
ENSMUSG00000013593.12	1411.91	0.244447	0.0859598	0.00435773	0.0124642	Ndufs2
ENSMUSG00000006403.13	45.2682	2.1365	0.40068	1.90174e-08	1.21607e-07	Adamts4
ENSMUSG00000052423.14	220.328	0.64698	0.18019	0.00025751	0.000936448	B4galt3
ENSMUSG00000062729.11	224.572	0.0849885	0.177204	0.627384	0.754505	Ppox
ENSMUSG00000053483.13	341.22	0.279605	0.143084	0.0485943	0.104881	Usp21
ENSMUSG00000062963.10	438.53	-0.349554	0.132774	0.00784285	0.0211127	Ufc1
ENSMUSG00000079137.3	8.02392	-0.546913	0.755935	0.315773	0.470676	Rpl27-ps1
ENSMUSG00000103983.1	66.89	0.0334488	0.308749	0.910496	0.947414	RP23-395H6.2
ENSMUSG00000013973.12	80.7349	0.450391	0.282038	0.0960619	0.185111	Dedd
ENSMUSG00000013997.10	175.821	0.789234	0.20113	6.09888e-05	0.000247644	Nit1
ENSMUSG00000006412.10	555.945	0.475448	0.116612	4.07509e-05	0.00017017	Pfdn2
ENSMUSG00000102929.1	17.574	0.66577	0.560221	0.158147	0.27724	RP23-191A19.1
ENSMUSG00000045259.4	6.01524	0.636861	0.825477	0.250572	0.396585	Klhdc9
ENSMUSG00000006411.12	17.5091	0.00857096	0.542186	0.986905	0.991781	Pvrl4
ENSMUSG00000048865.16	174.774	-0.146804	0.196367	0.445164	0.599537	Arhgap30
ENSMUSG00000026641.13	658.282	-0.0376841	0.112075	0.737389	0.836905	Usf1
ENSMUSG00000103711.1	19.5332	0.228386	0.510272	0.607317	0.739692	Tstd1
ENSMUSG00000038235.4	460.887	0.648053	0.131335	6.47577e-07	3.45915e-06	F11r
ENSMUSG00000091993.2	8.0007	1.84922	1.00486	0.0100563	0.0263617	B930036N10Rik
ENSMUSG00000060244.1	13.6203	1.50744	0.712219	0.00868385	0.0231263	Alyref2
ENSMUSG00000059058.7	64.5865	-0.325426	0.321343	0.283719	0.434481	Tma7-ps
ENSMUSG00000038147.13	3.0766	-0.271867	0.898423	0.558539	NA	Cd84
ENSMUSG00000015314.10	3.41354	0.110885	0.828852	0.820753	0.890871	Slamf6
ENSMUSG00000026556.15	208.103	-0.893661	0.191692	1.99846e-06	9.97736e-06	Vangl2
ENSMUSG00000051251.3	2.87451	-0.0558125	0.845303	0.905247	NA	Nhlh1
ENSMUSG00000003458.12	617.642	-0.0283394	0.111068	0.797756	0.877247	Ncstn
ENSMUSG00000026553.17	2844.62	-0.168117	0.0625394	0.00707706	0.0192327	Copa
ENSMUSG00000003464.13	717.334	0.224254	0.102678	0.0282249	0.0654936	Pex19
ENSMUSG00000089803.3	147.617	0.00956644	0.210359	0.963973	0.977782	Gm10171
ENSMUSG00000026554.15	1226.05	-0.404311	0.0851709	1.86759e-06	9.36256e-06	Dcaf8
ENSMUSG00000013698.12	63.2356	-0.0947509	0.317867	0.752097	0.847059	Pea15a
ENSMUSG00000007122.11	9.39643	-0.196336	0.663738	0.697245	0.808659	Casq1
ENSMUSG00000038034.15	156.491	-0.747991	0.218471	0.000440119	0.00153622	Igsf8
ENSMUSG00000007097.14	17.7627	-1.65746	0.72548	0.00635402	0.0174981	Atp1a2
ENSMUSG00000044708.5	8.63509	-0.331076	0.708757	0.521344	0.668159	Kcnj10
ENSMUSG00000050229.3	575.024	-0.169867	0.118061	0.147449	0.262156	Pigm
ENSMUSG00000026548.4	8.19486	-0.743866	0.816976	0.193398	0.324241	Slamf9
ENSMUSG00000037995.15	21.6621	0.106991	0.488156	0.804591	0.881914	Igsf9
ENSMUSG00000026547.15	979.982	-0.0845617	0.0906449	0.348629	0.505248	Tagln2
ENSMUSG00000026546.16	4.97614	0.0445858	0.764746	0.932168	0.960078	Cfap45
ENSMUSG00000060128.5	13.0119	-0.636117	0.652521	0.220957	0.360234	Gm10075
ENSMUSG00000037860.15	279.813	0.0793622	0.162166	0.620466	0.749644	Aim2
ENSMUSG00000026532.7	15.8888	-0.766087	0.630105	0.13391	0.243323	Spta1
ENSMUSG00000028354.13	80.9481	0.9822	0.284135	0.00031258	0.00112157	Fmn2
ENSMUSG00000026527.13	5.29438	1.73144	1.28391	0.0240557	0.057123	Rgs7
ENSMUSG00000026526.14	817.17	-0.4516	0.102129	8.64341e-06	3.97278e-05	Fh1
ENSMUSG00000026525.9	7.54187	0.332742	0.744477	0.521092	0.667925	Opn3
ENSMUSG00000078185.3	253.187	0.227988	0.168241	0.169709	0.293269	Chml
ENSMUSG00000026523.14	32.4336	-0.739703	0.453884	0.0696624	0.141922	Wdr64
ENSMUSG00000039748.11	824.304	0.105251	0.0969842	0.275951	0.425347	Exo1
ENSMUSG00000057335.11	645.183	0.0334358	0.115412	0.770732	0.859762	Cep170
ENSMUSG00000104154.1	3.01268	-0.0876493	0.846506	0.852566	NA	RP23-440J24.4
ENSMUSG00000026504.17	32.1536	0.561514	0.431625	0.14924	0.26471	Sdccag8
ENSMUSG00000019699.16	156.561	1.08802	0.211526	1.34474e-07	7.76468e-07	Akt3
ENSMUSG00000063659.11	269.898	0.170904	0.158651	0.275756	0.42517	Zbtb18
ENSMUSG00000102885.1	6.22369	4.4647	1.62077	0.00104106	0.00340543	RP23-326H11.2
ENSMUSG00000015961.8	1541.8	-0.10527	0.0793813	0.182947	0.310618	Adss
ENSMUSG00000104097.1	2.74119	0.344599	0.908586	0.476186	NA	RP23-243J5.2
ENSMUSG00000026502.13	407.936	-0.0638532	0.132949	0.627373	0.754505	Desi2
ENSMUSG00000103958.1	14.3168	3.01668	0.78121	1.37615e-05	6.15745e-05	RP24-259F2.1
ENSMUSG00000104126.1	3.75048	0.557267	0.916069	0.298756	0.451451	RP24-252K15.3
ENSMUSG00000086350.1	21.6746	-0.0475239	0.502902	0.911393	0.947788	B230369F24Rik
ENSMUSG00000039630.10	14085.1	0.199966	0.0473073	2.31952e-05	0.000100561	Hnrnpu
ENSMUSG00000104279.1	2.81027	0.335237	0.894318	0.491845	NA	RP24-252K15.4
ENSMUSG00000026495.8	16.238	-0.566272	0.599445	0.250108	0.396013	Efcab2
ENSMUSG00000026494.12	10.2707	0.384749	0.659202	0.44892	0.6029	Kif26b
ENSMUSG00000055067.15	287.218	-0.425063	0.158959	0.00670726	0.0183537	Smyd3
ENSMUSG00000096474.2	7.50723	-0.214814	0.706001	0.675095	0.792109	Gm5561
ENSMUSG00000026492.11	275.526	-0.332537	0.160111	0.0353266	0.0796951	Tfb2m
ENSMUSG00000038949.8	228.848	-0.456537	0.17916	0.00965071	0.0254221	Cnst
ENSMUSG00000038936.13	615.028	-1.47045	0.124822	1.62325e-32	3.8976e-31	Sccpdh
ENSMUSG00000026491.13	3845.8	0.25347	0.0582298	1.29644e-05	5.82634e-05	Ahctf1
ENSMUSG00000073486.2	2.30579	0.124885	0.882212	0.784552	NA	Gm10518
ENSMUSG00000026490.18	450.266	-0.151455	0.128478	0.234623	0.377628	Cdc42bpa
ENSMUSG00000102194.1	2.39061	0.00129008	0.989836	0.999969	NA	RP23-204N23.3
ENSMUSG00000026489.13	85.4092	0.024893	0.286507	0.929171	0.958445	Adck3
ENSMUSG00000010609.15	47.5539	-0.501645	0.376115	0.152112	0.268748	Psen2
ENSMUSG00000038855.10	12.0528	-0.061036	0.604051	0.89873	0.939895	Itpkb
ENSMUSG00000026496.11	4826.81	0.436824	0.0529391	1.42854e-16	1.80908e-15	Parp1
ENSMUSG00000058729.13	433.115	-0.0274749	0.128537	0.828773	0.896166	Lin9
ENSMUSG00000026497.7	2.69356	-0.320753	0.912338	0.506234	NA	Mixl1
ENSMUSG00000026499.5	769.37	-0.117511	0.101662	0.245252	0.390172	Acbd3
ENSMUSG00000103649.1	5.10375	0.214611	0.774909	0.679134	0.795453	RP23-201I6.5
ENSMUSG00000060743.12	2785.38	0.207137	0.0612409	0.000704062	0.00238054	H3f3a
ENSMUSG00000073485.3	5.917	0.251987	0.760793	0.624415	0.752621	H3f3aos
ENSMUSG00000038806.7	1468.61	0.256615	0.0787184	0.00107603	0.00351153	Sde2
ENSMUSG00000103979.1	41.7394	-0.230025	0.379916	0.51293	0.660606	RP23-172B15.2
ENSMUSG00000066652.5	170.289	-1.96669	0.240032	6.97658e-17	9.04159e-16	Lefty2
ENSMUSG00000026520.8	407.725	-0.591236	0.13794	1.52269e-05	6.7803e-05	Pycr2
ENSMUSG00000038793.8	213.732	-0.617154	0.184339	0.000655457	0.00222745	Lefty1
ENSMUSG00000026519.16	43.3516	-0.623636	0.388428	0.0823651	0.163224	Tmem63a
ENSMUSG00000038776.13	151.926	-0.804638	0.222058	0.000205178	0.000759232	Ephx1
ENSMUSG00000026516.8	1362.44	-0.266698	0.0824464	0.00116802	0.00378563	Nvl
ENSMUSG00000062169.13	423.75	-0.760058	0.135714	1.53801e-08	9.91329e-08	Cnih4
ENSMUSG00000038733.14	1631.65	-0.405847	0.0766115	1.07126e-07	6.26386e-07	Wdr26
ENSMUSG00000054135.2	3.70549	-0.625782	0.987641	0.259941	0.407064	A430110L20Rik
ENSMUSG00000081214.3	217.965	-0.0308446	0.178156	0.859253	0.916508	Rpl35a-ps2
ENSMUSG00000103260.1	11.2979	0.58566	0.657672	0.255152	0.401436	RP23-292F19.4
ENSMUSG00000047369.17	8.02435	-0.0991999	0.683328	0.843287	0.905872	Dnah14
ENSMUSG00000004880.11	1204.92	-0.513241	0.0903956	1.21848e-08	7.92215e-08	Lbr
ENSMUSG00000022995.16	2557.91	-0.687211	0.0682528	5.54824e-24	1.00038e-22	Enah
ENSMUSG00000103722.1	26.197	-0.56145	0.484692	0.189395	0.31913	RP23-73N8.4
ENSMUSG00000103317.1	9.9932	-0.251711	0.656852	0.61721	0.746958	RP23-73N8.3
ENSMUSG00000102950.1	35.2066	-0.153442	0.411815	0.682553	0.797402	RP23-73N8.2
ENSMUSG00000102760.1	14.4208	-0.261778	0.58859	0.587317	0.723142	RP23-73N8.1
ENSMUSG00000026511.7	723.226	-0.405046	0.107326	0.000144955	0.000549272	Srp9
ENSMUSG00000038633.5	1425.89	-0.276097	0.0783256	0.000402094	0.00141348	Degs1
ENSMUSG00000047539.9	786.419	0.559419	0.101002	2.56743e-08	1.61043e-07	Fbxo28
ENSMUSG00000026510.10	454.7	1.64978	0.126485	2.181e-39	6.25941e-38	Trp53bp2
ENSMUSG00000026509.15	52.0378	0.250211	0.338025	0.433123	0.587747	Capn2
ENSMUSG00000104415.1	2.03178	-0.414123	0.992415	0.369	NA	RP23-67I3.5
ENSMUSG00000038576.15	81.8905	-0.262339	0.281316	0.33171	0.487576	Susd4
ENSMUSG00000030768.12	117.141	-0.282822	0.243995	0.232396	0.375063	Disp1
ENSMUSG00000102478.1	7.29173	-0.398218	0.746402	0.452981	0.606564	RP24-268A16.1
ENSMUSG00000046836.13	765.55	-0.074003	0.103189	0.470121	0.622072	Brox
ENSMUSG00000042901.10	289.025	-0.630836	0.160839	6.95162e-05	0.000279231	Aida
ENSMUSG00000056050.13	1005.91	-0.462883	0.0941925	7.92504e-07	4.18948e-06	Mia3
ENSMUSG00000072258.10	197.706	-0.344656	0.188319	0.0625416	0.129606	Taf1a
ENSMUSG00000053461.9	3.31563	-0.45023	0.921844	0.381249	0.537974	Hhipl2
ENSMUSG00000103451.1	77.8841	8.78864	1.30582	9.78451e-11	7.95596e-10	RP24-411K2.1
ENSMUSG00000039384.8	30.0639	1.91285	0.484086	1.5976e-05	7.08458e-05	Dusp10
ENSMUSG00000039377.7	15.3504	3.29781	2.02423	0.00378327	0.011006	Hlx
ENSMUSG00000073481.9	504.795	-0.293334	0.122824	0.0161197	0.0400075	2023-03-02
ENSMUSG00000039349.5	59.6085	-0.854409	0.349732	0.00917059	0.0242795	C130074G19Rik
ENSMUSG00000026620.11	73.089	-0.143298	0.294819	0.610913	0.742906	Mark1
ENSMUSG00000039318.12	368.116	-0.0169918	0.142366	0.903109	0.943308	Rab3gap2
ENSMUSG00000026618.11	942.764	-0.121975	0.0928415	0.187365	0.316588	Iars2
ENSMUSG00000102526.1	7.41196	-1.20029	1.03477	0.0743332	0.149911	RP24-150H14.3
ENSMUSG00000026617.16	508.998	-0.569549	0.126581	5.73623e-06	2.70709e-05	Bpnt1
ENSMUSG00000026615.14	4706.79	-0.228476	0.0563246	4.77825e-05	0.000196947	Eprs
ENSMUSG00000026614.7	10.7827	-1.0177	0.7938	0.0854158	0.168171	Slc30a10
ENSMUSG00000039246.8	98.5697	0.0926921	0.257288	0.710283	0.817573	Lyplal1
ENSMUSG00000039239.14	20.8382	0.0231998	0.494161	0.958891	0.974972	Tgfb2
ENSMUSG00000001305.5	893.213	0.0859268	0.0937317	0.357671	0.514839	Rrp15
ENSMUSG00000097784.1	5.06271	0.30888	0.784334	0.553987	0.695496	A430105J06Rik
ENSMUSG00000104312.1	24.7351	0.258823	0.462776	0.531134	0.676125	RP23-429I18.2
ENSMUSG00000039224.1	968.566	1.33727	0.0931333	4.3439e-47	1.52951e-45	D1Pas1
ENSMUSG00000039210.16	369.252	0.360532	0.136791	0.00782713	0.0210733	Gpatch2
ENSMUSG00000104394.2	41.953	0.0183193	0.372445	0.959338	0.975242	RP23-306B14.3
ENSMUSG00000104245.1	34.369	-0.146264	0.407332	0.694046	0.806588	RP23-349L18.2
ENSMUSG00000103923.1	3.20595	0.318259	0.902218	0.503025	0.651974	RP23-349L18.1
ENSMUSG00000026610.13	6.42687	4.63137	1.60209	0.000820187	0.00273739	Esrrg
ENSMUSG00000026609.15	3.19265	0.2627	0.869676	0.593082	0.727515	Ush2a
ENSMUSG00000026608.13	670.903	0.460665	0.107504	1.64885e-05	7.30016e-05	Kctd3
ENSMUSG00000037624.15	3.28109	-0.440904	0.920054	0.389293	0.545333	Kcnk2
ENSMUSG00000102824.1	58.437	-0.73569	0.343994	0.0228314	0.0545776	RP23-411B11.2
ENSMUSG00000026605.14	2465.5	-0.165861	0.0756524	0.0277474	0.0645553	Cenpf
ENSMUSG00000026604.17	248.539	-0.927296	0.178185	1.23758e-07	7.18009e-07	Ptpn14
ENSMUSG00000104435.1	16.5444	-0.745379	0.609311	0.137675	0.248722	RP24-288J3.2
ENSMUSG00000026603.13	125.136	-1.00849	0.246972	2.56772e-05	0.000110801	Smyd2
ENSMUSG00000103467.1	2.01604	-0.323868	0.965222	0.437829	NA	RP24-288J3.1
ENSMUSG00000010175.13	7.19877	2.69043	1.13882	0.00199489	0.00615992	Prox1
ENSMUSG00000089872.10	191.289	-0.20803	0.188413	0.260888	0.407986	Rps6kc1
ENSMUSG00000026634.16	406.928	-0.408313	0.134938	0.00225935	0.00689641	Angel2
ENSMUSG00000037568.12	7.28127	0.348042	0.732758	0.503403	0.652172	Vash2
ENSMUSG00000066595.9	164.635	-0.651614	0.211334	0.00158762	0.00500836	Mfsd7b
ENSMUSG00000026632.17	44.494	-0.872799	0.404679	0.0187735	0.0458375	Tatdn3
ENSMUSG00000062510.12	346.139	-0.636003	0.147358	1.27652e-05	5.74479e-05	Nsl1
ENSMUSG00000103576.1	2.28754	-0.960203	1.4711	0.0682466	NA	RP23-399N18.7
ENSMUSG00000026628.13	84.0865	4.44689	0.388112	3.09845e-31	7.09718e-30	Atf3
ENSMUSG00000073478.6	10.0548	-0.145729	0.651017	0.770231	0.859359	D730003I15Rik
ENSMUSG00000103685.1	3.41442	-0.943107	1.2266	0.131702	0.240025	RP24-443M8.1
ENSMUSG00000037499.9	32.4093	0.260777	0.416998	0.493372	0.643014	Nenf
ENSMUSG00000026627.7	47.7536	1.08996	0.368064	0.00150068	0.00474799	Tmem206
ENSMUSG00000026626.11	513.615	0.675352	0.117639	7.37686e-09	4.94877e-08	Ppp2r5a
ENSMUSG00000102246.1	3.80955	-0.0164144	0.806277	0.971772	0.982457	RP24-566B6.4
ENSMUSG00000037474.13	1321.33	-0.271789	0.0831857	0.00103574	0.00339087	Dtl
ENSMUSG00000037461.10	782.31	-0.515973	0.101513	3.21431e-07	1.78174e-06	Ints7
ENSMUSG00000102970.1	1.96269	-0.397067	0.986831	0.385422	NA	RP24-566B6.2
ENSMUSG00000026623.16	511.205	0.211257	0.126296	0.0919494	0.178669	Lpgat1
ENSMUSG00000026622.15	847	-0.315239	0.0986435	0.00131759	0.00422387	Nek2
ENSMUSG00000055833.14	14.5869	-0.537585	0.60879	0.279935	0.429941	1700034H15Rik
ENSMUSG00000037434.7	716.697	-0.912845	0.115693	2.09597e-15	2.48709e-14	Slc30a1
ENSMUSG00000049353.17	18.3106	3.81106	0.757121	6.68738e-08	3.99821e-07	Rd3
ENSMUSG00000097416.3	3.76137	0.0902873	0.823514	0.856547	0.914923	Gm26670
ENSMUSG00000026637.13	29.4168	3.1399	0.544665	1.07465e-09	7.90643e-09	Traf5
ENSMUSG00000103653.1	34.7513	-0.25284	0.415734	0.503161	0.65205	WI1-1003N17.1
ENSMUSG00000037395.15	95.3563	-0.276444	0.268963	0.284877	0.435806	Rcor3
ENSMUSG00000058248.12	10.6072	0.222007	0.631031	0.656625	0.778536	Kcnh1
ENSMUSG00000037375.16	24.5478	-0.618287	0.516302	0.165657	0.287778	Hhat
ENSMUSG00000016262.14	18.1462	-0.304249	0.554709	0.516494	0.664049	Sertad4
ENSMUSG00000016200.14	347.343	-0.12621	0.145336	0.37975	0.536405	Syt14
ENSMUSG00000016181.9	330.605	0.735037	0.143721	2.3214e-07	1.31114e-06	Diexf
ENSMUSG00000026638.15	116.344	0.405793	0.235143	0.0758018	0.15246	Irf6
ENSMUSG00000079144.7	49.8008	-1.25283	0.40005	0.000741712	0.00249451	A130010J15Rik
ENSMUSG00000026639.18	8.72717	-0.117882	0.665672	0.814471	0.88765	Lamb3
ENSMUSG00000009633.3	3.94903	-0.289015	0.842626	0.565469	0.704964	G0s2
ENSMUSG00000026640.12	144.791	0.966302	0.215918	4.51728e-06	2.15968e-05	Plxna2
ENSMUSG00000016494.9	5.10859	0.546017	0.846251	0.316272	0.47113	Cd34
ENSMUSG00000096929.7	8.95939	-0.070096	0.663243	0.887399	0.93351	A330023F24Rik
ENSMUSG00000016493.13	4.4303	0.108919	0.787857	0.829313	0.896412	Cd46
ENSMUSG00000016481.15	252.58	-0.106549	0.182634	0.551374	0.693678	Cr1l
ENSMUSG00000093823.1	12.7019	7.97506	2.73192	4.3944e-07	2.4036e-06	Gm24802
ENSMUSG00000050530.14	95.8727	0.432555	0.256809	0.0812394	0.161368	Fam171a1
ENSMUSG00000026643.16	1468.95	0.330404	0.0841313	8.23364e-05	0.000325736	Nmt2
ENSMUSG00000049950.6	177.391	-0.0239473	0.196271	0.900073	0.941009	Rpp38
ENSMUSG00000026644.7	16.1639	0.515703	0.563031	0.274795	0.424061	Acbd7
ENSMUSG00000026648.18	171.599	-1.50773	0.224226	6.85273e-12	6.20391e-11	Dclre1c
ENSMUSG00000026646.16	253.656	-1.02186	0.177769	5.32636e-09	3.62712e-08	Suv39h2
ENSMUSG00000085043.1	3.0547	-0.283518	0.894364	0.547981	NA	Gm13184
ENSMUSG00000109865.1	1081.18	-0.221581	0.089672	0.0130391	0.0331983	NA
ENSMUSG00000051396.15	174.671	0.877297	0.204825	1.16755e-05	5.27643e-05	Hspa14
ENSMUSG00000039496.8	7.39095	-0.190928	0.706853	0.708721	0.816629	Cdnf
ENSMUSG00000026655.15	396.458	0.541614	0.136168	5.91703e-05	0.000240815	Fam107b
ENSMUSG00000026657.17	372.847	-1.42188	0.152796	5.48942e-21	8.71524e-20	Frmd4a
ENSMUSG00000039449.14	718.052	-0.171544	0.104061	0.097397	0.1872	Prpf18
ENSMUSG00000048186.14	25.228	0.41643	0.466492	0.316324	0.471135	Bend7
ENSMUSG00000026662.13	531.954	-0.885521	0.123909	5.91877e-13	5.88269e-12	Sephs1
ENSMUSG00000026664.7	391.492	-0.277883	0.13801	0.0421733	0.0926829	Phyh
ENSMUSG00000082795.1	2.75307	-0.196373	0.887958	0.665646	NA	Gm13193
ENSMUSG00000069188.5	10.1742	-0.0955039	0.644727	0.846317	0.907689	Gm13192
ENSMUSG00000026669.14	1559.29	-0.167532	0.076103	0.0272712	0.0636001	Mcm10
ENSMUSG00000026672.11	60.9576	-0.328842	0.321957	0.280913	0.431068	Optn
ENSMUSG00000026676.7	6.95775	0.414747	0.768334	0.432783	0.587564	Ccdc3
ENSMUSG00000039145.16	465.969	-1.59502	0.142425	1.20561e-29	2.62809e-28	Camk1d
ENSMUSG00000039128.13	537.223	-0.38238	0.119662	0.00128584	0.00413161	Cdc123
ENSMUSG00000025817.12	427.382	-0.678058	0.136842	5.47492e-07	2.95874e-06	Nudt5
ENSMUSG00000056718.2	8.66997	-0.438832	0.712767	0.405837	0.561056	Gm13199
ENSMUSG00000025816.15	374.308	-0.288114	0.141409	0.0397251	0.0882118	Sec61a2
ENSMUSG00000025815.13	453.531	0.362182	0.131363	0.00548368	0.0153254	Dhtkd1
ENSMUSG00000043241.14	1043.7	-0.142998	0.0891513	0.107321	0.203036	Upf2
ENSMUSG00000045319.13	26.3125	2.26853	0.544227	5.35821e-06	2.53919e-05	Proser2
ENSMUSG00000039063.5	396.51	8.68071	0.549236	3.25583e-55	1.32147e-53	Echdc3
ENSMUSG00000087125.1	8.74883	5.18679	1.50345	0.000170488	0.000637894	A230108P19Rik
ENSMUSG00000039046.15	327.739	-0.0978383	0.146211	0.498186	0.647201	Usp6nl
ENSMUSG00000002107.18	105.057	0.269434	0.272197	0.303027	0.456243	Celf2
ENSMUSG00000065824.1	99.629	2.78734	0.921159	0.000227631	0.000834517	Gm26315
ENSMUSG00000082953.3	199.294	-0.396134	0.187282	0.0312385	0.071486	Gm13217
ENSMUSG00000015619.10	4.0993	0.391178	0.842066	0.453507	0.607073	Gata3
ENSMUSG00000025782.12	526.039	0.970501	0.117531	8.93364e-17	1.14783e-15	Taf3
ENSMUSG00000103570.1	6.19487	1.49293	1.0708	0.0318954	0.072869	RP23-393G10.4
ENSMUSG00000025781.14	3278.49	-0.376456	0.0632404	2.85251e-09	2.00513e-08	Atp5c1
ENSMUSG00000037262.7	386.365	0.967219	0.139447	2.30067e-12	2.17203e-11	Kin
ENSMUSG00000025780.7	14.2147	0.277258	0.57638	0.562758	0.702571	Itih5
ENSMUSG00000086748.1	101.421	-0.853731	0.268501	0.000969298	0.00319059	Gm13261
ENSMUSG00000061186.15	339.769	0.602216	0.14185	1.78541e-05	7.87602e-05	Sfmbt2
ENSMUSG00000083900.2	3.39121	-0.533673	0.957459	0.317243	0.472033	Gm13294
ENSMUSG00000026778.13	30.4738	5.62518	0.816881	3.19887e-12	2.97799e-11	Prkcq
ENSMUSG00000082424.4	50.9805	0.379367	0.342441	0.238756	0.382313	Gm13292
ENSMUSG00000026773.19	309.893	0.765698	0.148692	1.87023e-07	1.06499e-06	Pfkfb3
ENSMUSG00000037197.11	1578.31	-0.0980572	0.0749455	0.189354	0.319115	Rbm17
ENSMUSG00000058594.15	656.782	0.0357964	0.107778	0.739924	0.838949	Fbxo18
ENSMUSG00000047909.11	325.495	0.0831389	0.14686	0.56825	0.706994	Ankrd16
ENSMUSG00000026768.10	8.04174	-0.406458	0.728247	0.444707	0.599067	Itga8
ENSMUSG00000026767.12	378.839	-0.318429	0.138824	0.0204562	0.0495099	Fam188a
ENSMUSG00000026730.12	53.0054	-0.0645691	0.345914	0.841894	0.904858	Pter
ENSMUSG00000026727.10	231.893	-0.389415	0.1748	0.023672	0.0563235	Rsu1
ENSMUSG00000102691.1	2.51436	-0.209257	0.886188	0.652427	NA	RP23-415C3.8
ENSMUSG00000086358.2	4.69684	0.905639	1.00033	0.131182	0.239265	Gm13270
ENSMUSG00000026723.10	87.4947	-0.571867	0.283243	0.034875	0.0788222	Trdmt1
ENSMUSG00000026728.9	1183.37	-0.63653	0.091651	3.15514e-12	2.9401e-11	Vim
ENSMUSG00000003418.11	93.0803	-0.560549	0.27511	0.0338708	0.0768212	St8sia6
ENSMUSG00000063275.15	51.7991	-0.411352	0.350604	0.210264	0.346175	Ptpla
ENSMUSG00000102553.1	3.7859	-0.365078	0.871362	0.479332	0.629619	RP23-334M9.3
ENSMUSG00000086657.2	3.39032	0.397464	0.884212	0.433601	0.588149	Stamos
ENSMUSG00000026718.17	521.507	0.519693	0.117354	8.15677e-06	3.76605e-05	Stam
ENSMUSG00000103901.1	13.9053	0.509939	0.596255	0.296358	0.448561	RP23-211O3.4
ENSMUSG00000061531.8	5.64375	0.270479	0.762971	0.600947	0.734424	Tmem236
ENSMUSG00000026712.3	12.0249	0.32097	0.61138	0.514108	0.66184	Mrc1
ENSMUSG00000070271.7	2.52569	0.0595802	0.859451	0.89951	NA	Gm13268
ENSMUSG00000085281.3	78.2055	-0.714898	0.299196	0.0123039	0.0315627	Gm13316
ENSMUSG00000026707.15	124.208	0.0765795	0.228899	0.732161	0.833305	Nsun6
ENSMUSG00000017418.14	1088.28	-0.40973	0.0935542	1.05918e-05	4.81471e-05	Arl5b
ENSMUSG00000102258.1	2.15421	-0.376794	0.973272	0.388272	NA	RP23-379F6.3
ENSMUSG00000075520.5	5.54442	2.75614	1.37463	0.00429353	0.0123132	Malrd1
ENSMUSG00000103865.1	3.5066	0.34862	0.861548	0.491331	0.641086	RP23-131N18.1
ENSMUSG00000026748.13	178.001	1.85827	0.197787	1.39572e-21	2.26977e-20	Plxdc2
ENSMUSG00000053702.16	1.96885	-0.317746	0.960206	0.448683	NA	Nebl
ENSMUSG00000054057.2	39.8444	-1.24241	0.443992	0.00220239	0.00674058	A930004D18Rik
ENSMUSG00000054074.9	70.9988	-0.553755	0.308991	0.0598727	0.124996	Skida1
ENSMUSG00000026743.16	1086.52	-0.525436	0.0887115	2.692e-09	1.90057e-08	Mllt10
ENSMUSG00000064964.1	1.83377	-0.331147	0.97591	0.444388	NA	Gm25147
ENSMUSG00000081619.1	2.131	-0.0861458	0.885248	0.845135	NA	Gm13351
ENSMUSG00000026740.12	286.629	0.962087	0.155009	3.23706e-10	2.52116e-09	Dnajc1
ENSMUSG00000051154.11	312.603	-0.0048543	0.1504	0.973086	0.983113	Commd3
ENSMUSG00000026739.13	417.435	0.548451	0.136095	4.63288e-05	0.00019128	Bmi1
ENSMUSG00000026737.12	182.131	0.959743	0.192215	3.58452e-07	1.97735e-06	Pip4k2a
ENSMUSG00000023094.14	75.7241	-0.602772	0.301781	0.036484	0.0819706	Msrb2
ENSMUSG00000043415.5	149.197	0.368686	0.208819	0.0710016	0.144166	Otud1
ENSMUSG00000036617.17	1092.77	-0.954853	0.0927017	4.46879e-25	8.36056e-24	Etl4
ENSMUSG00000060795.5	9.95162	0.246719	0.647675	0.623879	0.752295	Gm13363
ENSMUSG00000082164.1	288.612	9.37858	0.813281	2.41177e-29	5.17598e-28	Gm13360
ENSMUSG00000081128.1	34.7566	0.076722	0.401379	0.83681	0.901291	Gm13328
ENSMUSG00000085477.7	556.817	8.30928	0.410196	3.25154e-90	2.13841e-88	Gm13335
ENSMUSG00000086418.1	1.99723	-0.406717	0.989566	0.376457	NA	Gm13362
ENSMUSG00000036591.16	1133.78	-0.17888	0.0881971	0.0417791	0.0919729	Arhgap21
ENSMUSG00000075514.4	9.7832	1.1884	0.792699	0.044364	0.0968064	Gm13375
ENSMUSG00000048550.17	145.829	0.49573	0.21271	0.0169422	0.0418377	Thnsl1
ENSMUSG00000084071.1	49.0475	-0.303931	0.359152	0.363834	0.520632	Gm13378
ENSMUSG00000083863.1	231.007	0.139876	0.186292	0.446515	0.600895	Gm13341
ENSMUSG00000083563.1	309.355	-0.180276	0.175256	0.296572	0.448775	Gm13340
ENSMUSG00000082884.1	22.5914	-0.407687	0.508383	0.357526	0.514719	Gm13339
ENSMUSG00000026787.3	4.58892	-0.217714	0.809174	0.666352	0.784984	Gad2
ENSMUSG00000026784.14	213.073	-0.429598	0.181757	0.0161481	0.0400625	Pdss1
ENSMUSG00000058835.14	883.539	0.0198433	0.098028	0.83964	0.903536	Abi1
ENSMUSG00000083650.1	5.08603	1.03431	1.09048	0.094872	0.18331	Gm13357
ENSMUSG00000026781.17	381.051	-0.545506	0.140408	8.73147e-05	0.000343958	Acbd5
ENSMUSG00000026779.6	670.114	-0.385854	0.109042	0.0003663	0.00129729	Mastl
ENSMUSG00000026775.9	3203.21	-0.096231	0.0596289	0.106025	0.20117	Yme1l1
ENSMUSG00000081648.1	4.14517	0.703968	0.952853	0.211649	0.347953	Gm13423
ENSMUSG00000084098.1	2.47982	-0.199513	0.886362	0.666131	NA	Gm13422
ENSMUSG00000102704.1	3.24039	-0.488285	0.945857	0.35001	0.506758	RP23-183O12.1
ENSMUSG00000026771.14	234.903	-0.342441	0.173473	0.0449525	0.0979253	Spopl
ENSMUSG00000083373.1	5.5629	-0.456738	0.817413	0.395585	0.551069	Gm13392
ENSMUSG00000083116.1	25.3349	-0.39768	0.475606	0.344928	0.501107	Gm13410
ENSMUSG00000026979.16	67.9315	1.24902	0.309914	2.37531e-05	0.000102819	Psd4
ENSMUSG00000026976.15	2.59995	0.200243	0.895214	0.662672	NA	Pax8
ENSMUSG00000004113.18	17.1215	1.67525	0.634753	0.00195174	0.00604111	Cacna1b
ENSMUSG00000036893.17	660.675	0.568517	0.10558	6.15667e-08	3.70374e-07	Ehmt1
ENSMUSG00000103162.1	2.69356	-0.320753	0.912338	0.506234	NA	RP23-358I10.3
ENSMUSG00000102875.1	4.45351	-0.118411	0.798374	0.810134	0.885587	RP23-358I10.4
ENSMUSG00000026972.15	68.0437	0.354796	0.301389	0.218165	0.356401	Arrdc1
ENSMUSG00000026974.11	866.804	-0.161368	0.0955442	0.0897276	0.174955	Zmynd19
ENSMUSG00000026975.10	253.153	-0.0630016	0.164735	0.697424	0.80877	Dph7
ENSMUSG00000036850.4	95.995	-0.203634	0.260299	0.417548	0.57276	Mrpl41
ENSMUSG00000036833.16	98.3347	-0.344173	0.267782	0.181615	0.309005	Pnpla7
ENSMUSG00000084383.1	17.4125	-0.31564	0.546792	0.494198	0.643506	Gm13370
ENSMUSG00000006476.19	32.3365	0.471826	0.421615	0.218562	0.356929	Nsmf
ENSMUSG00000078202.3	10.2591	2.36311	0.892795	0.00109728	0.00357426	Nrarp
ENSMUSG00000059555.6	60.0358	-0.159914	0.323293	0.600684	0.734195	Tor4a
ENSMUSG00000013465.19	608.308	0.438324	0.112068	8.35042e-05	0.000329885	Nelfb
ENSMUSG00000064919.1	3.78018	0.156329	0.814194	0.756373	0.84995	Gm22572
ENSMUSG00000036770.11	3.44192	0.0305816	0.828778	0.951419	0.970882	4933433C11Rik
ENSMUSG00000026969.3	3.79118	0.660281	0.963679	0.228739	0.370308	Fam166a
ENSMUSG00000036752.4	6852.59	0.952529	0.0517333	6.51588e-76	3.6326e-74	Tubb4b
ENSMUSG00000006469.13	9.20942	0.0811742	0.658722	0.872967	0.924826	Slc34a3
ENSMUSG00000089953.3	2.04442	-0.42362	0.995339	0.361376	NA	Rnf224
ENSMUSG00000036731.7	4.70872	0.26052	0.792077	0.611882	0.743665	Cysrt1
ENSMUSG00000044628.5	36.0378	0.215125	0.405624	0.5638	0.703608	Rnf208
ENSMUSG00000006471.18	140.829	-0.719349	0.23081	0.0013779	0.00439683	Ndor1
ENSMUSG00000078201.5	19.9556	1.46329	0.590024	0.00371588	0.010836	Tmem203
ENSMUSG00000048707.9	296.43	0.141685	0.159811	0.369977	0.527014	Tprn
ENSMUSG00000026966.6	345.275	-0.86766	0.149835	4.65947e-09	3.19429e-08	Ssna1
ENSMUSG00000026965.12	740.085	0.165882	0.105108	0.112808	0.211315	Anapc2
ENSMUSG00000026961.6	3.47206	0.3611	0.864585	0.47752	0.628391	Lrrc26
ENSMUSG00000026959.13	258.748	0.970344	0.162925	1.50275e-09	1.08705e-08	Grin1
ENSMUSG00000085830.1	6.20148	-0.18269	0.736065	0.722073	0.826437	Grin1os
ENSMUSG00000036646.13	851.477	-0.337788	0.0971997	0.000477523	0.00165883	Man1b1
ENSMUSG00000026958.13	895.534	-0.263018	0.0971667	0.00654519	0.0179674	Dpp7
ENSMUSG00000026956.15	826.055	0.867979	0.0974476	3.5542e-19	5.17293e-18	Uap1l1
ENSMUSG00000026955.13	182.922	0.559205	0.194594	0.00339076	0.0100006	Sapcd2
ENSMUSG00000015085.8	16.2103	0.279596	0.547723	0.546371	0.689799	Entpd2
ENSMUSG00000015094.16	131.456	-0.0942429	0.224909	0.666329	0.784984	Npdc1
ENSMUSG00000026944.18	188.256	0.0670355	0.192426	0.723303	0.827131	Abca2
ENSMUSG00000047617.11	12.4019	-0.431435	0.642775	0.392457	0.548314	BC029214
ENSMUSG00000015093.15	2.76341	0.154756	0.865464	0.745719	NA	Clic3
ENSMUSG00000015090.13	6.22469	-0.386168	0.772371	0.466919	0.619143	Ptgds
ENSMUSG00000015083.11	22.3748	0.109728	0.497296	0.801507	0.879869	C8g
ENSMUSG00000015095.12	179.605	0.252302	0.200988	0.201463	0.334926	Fbxw5
ENSMUSG00000026942.13	204.41	-0.31873	0.186318	0.0812536	0.161368	Traf2
ENSMUSG00000015092.9	484.05	0.112159	0.12444	0.36392	0.520718	Edf1
ENSMUSG00000026941.16	44.06	-0.45435	0.378702	0.196326	0.328186	Mamdc4
ENSMUSG00000036504.6	7.48412	0.564414	0.778002	0.295238	0.447354	Phpt1
ENSMUSG00000029419.8	9.53405	0.233665	0.65091	0.644604	0.768518	Gm996
ENSMUSG00000015087.14	698.535	-0.15768	0.106003	0.134601	0.244376	Rabl6
ENSMUSG00000052403.11	4.0531	0.298524	0.840178	0.55199	0.694138	Fcnaos
ENSMUSG00000026940.3	4.47001	0.263788	0.803824	0.607103	0.739571	Ccdc183
ENSMUSG00000026939.12	13.1129	-0.276487	0.605472	0.570947	0.709469	Tmem141
ENSMUSG00000026938.10	2.9327	0.366272	0.908482	0.451296	NA	Fcna
ENSMUSG00000049086.8	11.8849	0.129983	0.602722	0.791192	0.872601	Bmyc
ENSMUSG00000036401.5	5.60195	6.29487	2.74121	9.90975e-05	0.000386839	Glt6d1
ENSMUSG00000023210.2	7.72172	4.91264	1.54441	0.000355553	0.00126234	Lcn9
ENSMUSG00000058740.14	13.3984	1.73826	0.758271	0.00450193	0.0128406	Kcnt1
ENSMUSG00000026933.17	980.776	0.181492	0.0930871	0.0501181	0.107619	Camsap1
ENSMUSG00000036352.16	444.699	-0.277593	0.129395	0.0303901	0.0698328	Ubac1
ENSMUSG00000026932.14	47.116	-0.530738	0.370527	0.123945	0.228514	Nacc2
ENSMUSG00000087679.2	101.846	-0.402788	0.258985	0.107224	0.202924	C330006A16Rik
ENSMUSG00000087595.1	5.63364	-0.853465	0.983691	0.164373	0.286086	1810012K08Rik
ENSMUSG00000036327.18	332.303	-0.014412	0.147777	0.920636	0.953376	Qsox2
ENSMUSG00000048038.8	3.26921	0.0740316	0.827051	0.881131	0.929521	4932418E24Rik
ENSMUSG00000026930.15	42.0422	-0.905628	0.417113	0.0176227	0.0433661	Gpsm1
ENSMUSG00000075467.4	125.302	-0.33735	0.239241	0.146208	0.260331	Dnlz
ENSMUSG00000026928.14	20.5357	-0.395363	0.524687	0.382068	0.538869	Card9
ENSMUSG00000086779.1	6.81068	0.166315	0.723448	0.749596	0.845343	Gm13562
ENSMUSG00000036281.13	556.53	-0.0805805	0.117163	0.488324	0.638537	Snapc4
ENSMUSG00000085767.1	14.9348	-0.161889	0.563395	0.729502	0.831652	Gm13563
ENSMUSG00000026927.17	462.91	-0.182285	0.126005	0.144721	0.258419	Sdccag3
ENSMUSG00000026926.14	1497.82	-0.121559	0.0788674	0.121447	0.224764	Pmpca
ENSMUSG00000026925.16	114.922	0.512541	0.238406	0.026939	0.062969	Inpp5e
ENSMUSG00000026924.17	1661.46	-0.216362	0.073795	0.00327794	0.00968998	Sec16a
ENSMUSG00000086714.1	4.06476	0.396674	0.848116	0.447233	0.601509	0610009E02Rik
ENSMUSG00000026923.15	794.223	0.519355	0.100414	2.04409e-07	1.16127e-06	Notch1
ENSMUSG00000026921.20	114.34	0.186156	0.242421	0.430105	0.584879	Egfl7
ENSMUSG00000026922.13	299.795	-0.795846	0.159799	4.44732e-07	2.43118e-06	Agpat2
ENSMUSG00000036186.5	22.8318	0.166375	0.478837	0.695658	0.807673	Fam69b
ENSMUSG00000077192.3	33.0482	0.892265	0.430047	0.021973	0.0527662	Snora17
ENSMUSG00000015787.15	2.65902	-0.313961	0.910358	0.514792	NA	Abo
ENSMUSG00000036160.13	1014.44	0.616977	0.0913582	1.18886e-11	1.0508e-10	Surf6
ENSMUSG00000015776.12	460.147	-0.15808	0.126224	0.206831	0.341858	Med22
ENSMUSG00000062647.16	16464.8	0.234016	0.0489828	1.59896e-06	8.06801e-06	Rpl7a
ENSMUSG00000065258.1	8.55974	0.570865	0.733163	0.287133	0.438462	Gm23969
ENSMUSG00000015790.16	134.882	-0.456833	0.225852	0.0377006	0.0843536	Surf1
ENSMUSG00000014873.15	228.025	-0.271678	0.174703	0.11431	0.21365	Surf2
ENSMUSG00000014867.9	1826.04	-0.362142	0.0736649	8.3082e-07	4.37771e-06	Surf4
ENSMUSG00000049897.14	11.3747	0.355134	0.625561	0.477235	0.628144	Stkld1
ENSMUSG00000052406.14	426.326	0.336564	0.133888	0.0113017	0.0292704	Rexo4
ENSMUSG00000015488.14	150.424	0.455193	0.211727	0.0278504	0.0647485	Cacfd1
ENSMUSG00000036067.12	8.35998	0.33607	0.692655	0.515829	0.663362	Slc2a6
ENSMUSG00000087364.1	2.67651	0.0106135	0.851855	0.983443	NA	Gm13398
ENSMUSG00000009216.7	2.54967	0.293254	0.918566	0.528171	NA	Fam163b
ENSMUSG00000009621.18	195.348	-0.331707	0.191878	0.0778331	0.155915	Vav2
ENSMUSG00000109946.1	7.43187	0.856476	0.822732	0.137712	0.24874	NA
ENSMUSG00000026918.16	781.269	-0.277907	0.103752	0.00706328	0.0192006	Brd3
ENSMUSG00000026917.15	3799.48	-0.360228	0.0604565	2.33604e-09	1.66195e-08	Wdr5
ENSMUSG00000085929.1	7.20779	-1.24463	1.03891	0.0698706	0.142256	Gm13421
ENSMUSG00000015846.15	3760.95	5.22695	0.0804856	0	0	Rxra
ENSMUSG00000026837.16	193.002	0.730251	0.185356	6.01133e-05	0.000244345	Col5a1
ENSMUSG00000026833.18	47.8469	1.01045	0.365506	0.00300719	0.00896555	Olfm1
ENSMUSG00000035829.13	53.9696	-0.632397	0.361506	0.0617697	0.128321	Ppp1r26
ENSMUSG00000026831.16	92.6258	-0.535225	0.279057	0.0463002	0.100478	1700007K13Rik
ENSMUSG00000035772.11	1112.04	0.0634778	0.0885178	0.471849	0.623147	Mrps2
ENSMUSG00000082895.1	30.4587	-0.496466	0.453073	0.220492	0.359566	Rpsa-ps9
ENSMUSG00000026829.9	21.5067	-0.9528	0.586342	0.0536631	0.114108	Gbgt1
ENSMUSG00000063611.5	26.2037	-0.204981	0.465512	0.620958	0.749965	Gm10134
ENSMUSG00000026821.16	353.025	-0.509627	0.149684	0.000569504	0.0019528	Ralgds
ENSMUSG00000087667.8	2.66518	-0.254479	0.889726	0.590767	NA	Gm13381
ENSMUSG00000026816.14	349.862	0.343764	0.141719	0.0143555	0.0361464	Gtf3c5
ENSMUSG00000026812.16	858.641	0.184987	0.09727	0.0562662	0.118712	Tsc1
ENSMUSG00000026809.15	3.18099	0.186415	0.854469	0.698216	0.809205	1700026L06Rik
ENSMUSG00000026807.8	9.36057	-0.03788	0.649107	0.938107	0.963331	Ak8
ENSMUSG00000035666.14	1400.08	-0.102398	0.0788646	0.192483	0.323041	Gtf3c4
ENSMUSG00000026806.15	261.429	0.156232	0.169285	0.35058	0.507317	Ddx31
ENSMUSG00000026805.14	6.82872	-0.131436	0.713991	0.796687	0.876367	Barhl1
ENSMUSG00000079502.8	22.5121	-0.26684	0.494537	0.535494	0.680495	1700101E01Rik
ENSMUSG00000083773.4	808.855	0.16745	0.100274	0.0936283	0.181431	Gm13394
ENSMUSG00000026803.17	544.701	0.0469666	0.121594	0.6978	0.808916	Ttf1
ENSMUSG00000043535.13	2928.57	-0.538091	0.0680276	2.12962e-15	2.52239e-14	Setx
ENSMUSG00000035513.19	4.20996	-0.426367	0.863799	0.419611	0.574434	Ntng2
ENSMUSG00000026799.15	204.036	1.07472	0.182537	2.12706e-09	1.51941e-08	Med27
ENSMUSG00000039844.20	1000.12	-0.648376	0.0938259	3.85461e-12	3.56961e-11	Rapgef1
ENSMUSG00000079497.4	5.71889	-0.323323	0.77756	0.538895	0.683385	Gm13420
ENSMUSG00000075425.10	7.26423	-1.26644	1.03444	0.0663491	0.136201	Gm13547
ENSMUSG00000039826.13	683.032	-0.221145	0.107751	0.038843	0.0865403	Trub2
ENSMUSG00000026798.10	83.3529	0.177039	0.274501	0.503932	0.652656	Coq4
ENSMUSG00000059316.2	369.289	0.142264	0.137563	0.29717	0.449368	Slc27a4
ENSMUSG00000069020.9	416.035	-0.473137	0.135151	0.000410968	0.00144285	Urm1
ENSMUSG00000039787.13	108.06	-0.371852	0.266884	0.146595	0.260879	Cercam
ENSMUSG00000026790.19	2278.12	-0.406369	0.0666991	1.03219e-09	7.61136e-09	Odf2
ENSMUSG00000019715.14	669.702	-0.00831316	0.110941	0.940534	0.964394	Gle1
ENSMUSG00000057738.14	2979.76	-0.316358	0.0609738	2.00202e-07	1.1387e-06	Sptan1
ENSMUSG00000039715.8	161.028	-0.168213	0.20425	0.39977	0.555185	Wdr34
ENSMUSG00000054766.13	8207.9	-0.331674	0.0500754	3.27303e-11	2.78065e-10	Set
ENSMUSG00000026785.14	121.646	-0.321945	0.235801	0.160458	0.280405	Pkn3
ENSMUSG00000015335.16	186.306	0.24096	0.189876	0.196316	0.328186	Zdhhc12
ENSMUSG00000039686.14	137.953	-0.195751	0.224456	0.369746	0.526893	Zer1
ENSMUSG00000039678.12	1371.12	-1.00991	0.0829522	2.48322e-34	6.31415e-33	Tbc1d13
ENSMUSG00000085401.2	15.2243	-0.548635	0.603561	0.265839	0.413781	Slc39a1-ps
ENSMUSG00000015337.5	19.294	-0.00572177	0.518288	0.988053	0.992566	Endog
ENSMUSG00000039660.16	317.189	0.0746791	0.154545	0.626247	0.753756	D2Wsu81e
ENSMUSG00000039648.14	70.4852	-0.503201	0.307557	0.0859671	0.168964	Ccbl1
ENSMUSG00000100747.4	3.83221	0.506285	0.89209	0.340995	0.496968	1700084E18Rik
ENSMUSG00000007476.18	65.1607	0.496004	0.309941	0.0920604	0.178838	Lrrc8a
ENSMUSG00000079484.12	2.84438	-0.362702	0.919961	0.460556	NA	Phyhd1
ENSMUSG00000075419.4	77.0815	0.953398	0.295519	0.000708879	0.00239432	Dolk
ENSMUSG00000052533.14	1796.03	-0.0622465	0.0717538	0.384028	0.540593	Nup188
ENSMUSG00000084892.1	2.74075	-0.340533	0.914319	0.485566	NA	Gm14471
ENSMUSG00000026860.16	199.352	-0.595663	0.190902	0.00145744	0.00462324	Sh3glb2
ENSMUSG00000026858.18	236.582	-0.442007	0.176449	0.0108121	0.0281452	Fam73b
ENSMUSG00000026856.14	282.75	-0.68505	0.168939	3.94613e-05	0.000164998	Dolpp1
ENSMUSG00000026853.15	116.845	-0.262572	0.24485	0.269289	0.417657	Crat
ENSMUSG00000039515.11	819.715	-0.651479	0.100084	6.0217e-11	5.00759e-10	Ppp2r4
ENSMUSG00000089762.3	83.5322	0.956349	0.285124	0.000463235	0.00161264	Ier5l
ENSMUSG00000044320.14	7.00198	-0.787769	0.874175	0.180129	0.306982	1700001O22Rik
ENSMUSG00000026857.9	135.94	-0.665818	0.229958	0.00291496	0.0087233	Ntmt1
ENSMUSG00000039483.10	501.698	0.128421	0.121748	0.288704	0.440169	Asb6
ENSMUSG00000039476.13	5.94143	-0.892075	0.969636	0.148584	0.263837	Prrx2
ENSMUSG00000050737.13	180.353	-1.18949	0.21182	9.27893e-09	6.14824e-08	Ptges
ENSMUSG00000026848.14	588.506	-0.161075	0.115462	0.160279	0.280116	Tor1b
ENSMUSG00000026849.18	373.87	-0.0234836	0.137898	0.862692	0.918981	Tor1a
ENSMUSG00000026851.9	338.405	-0.00273253	0.145009	0.983969	0.989939	BC005624
ENSMUSG00000026854.16	180.079	0.0913736	0.192964	0.63015	0.756624	Usp20
ENSMUSG00000075415.13	676.849	-0.476138	0.10853	1.02443e-05	4.66112e-05	Fnbp1
ENSMUSG00000087269.1	7.48424	-0.438059	0.795402	0.406109	0.561308	D330023K18Rik
ENSMUSG00000000194.13	906.423	-0.633242	0.102389	4.99167e-10	3.80225e-09	Gpr107
ENSMUSG00000087430.1	2.24727	-0.125153	0.884177	0.78029	NA	Gm13405
ENSMUSG00000062661.6	92.917	-0.414109	0.268277	0.108861	0.205272	Ncs1
ENSMUSG00000055632.18	65.4678	-1.04098	0.339455	0.0010908	0.00355616	Hmcn2
ENSMUSG00000076441.9	1894.19	-0.349112	0.0714974	9.8786e-07	5.14786e-06	Ass1
ENSMUSG00000026843.15	1715.9	-0.296165	0.076471	0.000101921	0.000397462	Fubp3
ENSMUSG00000039356.15	665.615	-0.114747	0.106676	0.279124	0.429036	Exosc2
ENSMUSG00000026842.16	989.748	0.166123	0.0983171	0.0900674	0.175492	Abl1
ENSMUSG00000026840.14	3.61671	0.217358	0.829336	0.664979	0.783953	Lamc3
ENSMUSG00000001864.13	25.514	-0.0141346	0.457594	0.970883	0.981832	Aif1l
ENSMUSG00000001855.15	1014.5	0.271839	0.0890738	0.00219124	0.00670857	Nup214
ENSMUSG00000081480.1	3.36194	0.516226	0.930235	0.320147	0.475115	Gm13608
ENSMUSG00000050592.8	52.5535	-0.759219	0.386168	0.0326123	0.0743229	Fam78a
ENSMUSG00000051373.5	15.2254	-0.372056	0.580666	0.439789	0.594258	Ppapdc3
ENSMUSG00000039262.16	3709.37	-0.62765	0.0595956	5.14487e-26	9.91218e-25	Prrc2b
ENSMUSG00000094251.1	2.00339	-0.328339	0.962078	0.437235	NA	Gm25632
ENSMUSG00000086216.1	1.99723	-0.406717	0.989566	0.376457	NA	Gm13610
ENSMUSG00000039254.16	254.417	-0.69147	0.177758	7.83834e-05	0.00031175	Pomt1
ENSMUSG00000002550.16	419.573	-0.358421	0.132164	0.00621719	0.0171505	Uck1
ENSMUSG00000066068.5	21.6506	-0.403539	0.514512	0.363388	0.520262	Gm13611
ENSMUSG00000044627.11	1586.81	-0.558365	0.0775745	5.02648e-13	5.02674e-12	Swi5
ENSMUSG00000002546.17	757.944	0.0735799	0.101805	0.468455	0.620418	Golga2
ENSMUSG00000026825.17	88.6647	-0.817065	0.296699	0.00405749	0.011709	Dnm1
ENSMUSG00000039205.16	116.91	-0.144268	0.237192	0.53063	0.675908	Ciz1
ENSMUSG00000039195.4	61.7139	-0.561272	0.347511	0.0864654	0.169837	1110008P14Rik
ENSMUSG00000026820.5	184.781	0.817656	0.192474	1.4895e-05	6.64012e-05	Ptges2
ENSMUSG00000026819.15	318.787	1.02393	0.160374	9.64072e-11	7.84233e-10	Slc25a25
ENSMUSG00000039164.2	49.9134	-0.342699	0.356346	0.304856	0.458383	Naif1
ENSMUSG00000039157.12	367.152	0.0075974	0.14701	0.958729	0.974859	Fam102a
ENSMUSG00000026810.12	238.77	-0.254714	0.177179	0.144134	0.257656	Dpm2
ENSMUSG00000046854.16	6.02326	-0.153454	0.783163	0.757805	0.850919	Pip5kl1
ENSMUSG00000079442.12	57.562	0.352361	0.325491	0.253568	0.399697	St6galnac4
ENSMUSG00000026811.18	132.844	-0.719184	0.236267	0.00174977	0.0054736	St6galnac6
ENSMUSG00000026817.14	435.621	-1.19194	0.139252	5.71005e-18	7.89599e-17	Ak1
ENSMUSG00000026814.16	483.724	-0.383448	0.124219	0.00186581	0.00580105	Eng
ENSMUSG00000009566.12	496.804	0.497097	0.120214	3.12791e-05	0.00013308	Fpgs
ENSMUSG00000009555.16	1197.17	1.08489	0.0828551	2.00444e-39	5.76975e-38	Cdk9
ENSMUSG00000059013.12	120.342	3.55912	0.283352	6.43237e-37	1.75273e-35	Sh2d3c
ENSMUSG00000039021.15	3.93672	-0.40394	0.876862	0.440091	0.594445	Ttc16
ENSMUSG00000009563.16	211.406	-0.0621235	0.179917	0.724667	0.828088	Tor2a
ENSMUSG00000053746.8	31.8839	0.192691	0.418266	0.614137	0.744974	Ptrh1
ENSMUSG00000038987.8	24.8088	-0.0272573	0.472796	0.946356	0.968265	1700019L03Rik
ENSMUSG00000026797.16	119.479	-0.55446	0.24098	0.0176938	0.0435135	Stxbp1
ENSMUSG00000026796.16	321.289	-0.648178	0.153667	1.92428e-05	8.43112e-05	Fam129b
ENSMUSG00000026792.16	127.81	-0.567556	0.233762	0.0125191	0.0320425	Lrsam1
ENSMUSG00000038900.17	24653.3	0.137525	0.0510073	0.00695801	0.0189543	Rpl12
ENSMUSG00000026791.14	114.464	-0.172016	0.241949	0.463049	0.615485	Slc2a8
ENSMUSG00000038860.15	105.081	-0.397144	0.271964	0.130356	0.238026	Garnl3
ENSMUSG00000038831.16	134.231	-0.501382	0.228806	0.0243514	0.0577133	Ralgps1
ENSMUSG00000004105.8	12.7219	-0.833444	0.709551	0.127358	0.23352	Angptl2
ENSMUSG00000068966.10	433.899	0.0645912	0.128774	0.613536	0.744463	Zbtb34
ENSMUSG00000026788.13	851.489	0.509178	0.094978	7.27936e-08	4.33477e-07	Zbtb43
ENSMUSG00000038765.14	43.6473	1.31927	0.395715	0.000322194	0.00115351	Lmx1b
ENSMUSG00000038740.9	117.27	-0.745087	0.249634	0.00207847	0.00639462	Mvb12b
ENSMUSG00000086904.1	4.23394	-0.192617	0.809694	0.702787	0.812367	Gm13404
ENSMUSG00000087461.2	4.81399	-0.120291	0.776541	0.812142	0.886462	C230014O12Rik
ENSMUSG00000103413.1	7.49468	6.93259	2.71137	1.52481e-05	6.78659e-05	RP23-241O13.3
ENSMUSG00000038718.15	84.4457	1.2376	0.283829	5.78187e-06	2.72466e-05	Pbx3
ENSMUSG00000038696.14	418.201	0.767405	0.130777	3.1864e-09	2.22933e-08	Mapkap1
ENSMUSG00000081992.1	198.16	0.156612	0.182777	0.384288	0.540864	Gm13408
ENSMUSG00000087635.3	13.4535	-0.485535	0.620393	0.33114	0.486812	Gm13414
ENSMUSG00000026867.18	1188.63	-0.196142	0.0846019	0.0198874	0.0482898	Gapvd1
ENSMUSG00000026864.13	9036.96	-0.251247	0.0514835	1.0231e-06	5.31578e-06	Hspa5
ENSMUSG00000070953.13	184.39	0.0797979	0.193983	0.675732	0.792503	Rabepk
ENSMUSG00000035949.15	911.835	-0.0955569	0.0931191	0.30301	0.456243	Fbxw2
ENSMUSG00000107167.3	10.5396	-0.768136	0.736514	0.166982	0.289535	NA
ENSMUSG00000026869.12	1185.82	0.221432	0.0842607	0.00838251	0.0224038	Psmd5
ENSMUSG00000026873.9	34.8935	-0.804263	0.456884	0.0487605	0.105182	Phf19
ENSMUSG00000026875.14	709.459	5.78144	0.178418	9.04647e-231	1.4505e-228	Traf1
ENSMUSG00000083533.2	13.2536	8.05305	2.73338	3.1582e-07	1.75264e-06	Gm13450
ENSMUSG00000026874.10	6.99702	0.060907	0.701811	0.906794	0.945094	Hc
ENSMUSG00000057110.15	535.243	-0.58285	0.123493	1.9108e-06	9.55698e-06	Cntrl
ENSMUSG00000026878.17	1316.3	-0.0906841	0.0885382	0.303033	0.456243	Rab14
ENSMUSG00000026879.14	22.2084	-0.317857	0.507762	0.468444	0.620418	Gsn
ENSMUSG00000026880.11	174.751	0.353562	0.195766	0.0658099	0.135309	Stom
ENSMUSG00000075391.6	90.6635	-0.931941	0.285619	0.000668237	0.0022685	Gm13443
ENSMUSG00000035778.17	557.213	1.20341	0.115903	1.34429e-25	2.56446e-24	Ggta1
ENSMUSG00000026883.17	465.715	0.225849	0.130403	0.0812505	0.161368	Dab2ip
ENSMUSG00000026895.7	268.302	-0.0242859	0.163878	0.879872	0.928906	Ndufa8
ENSMUSG00000026890.19	15.9079	1.32949	0.674064	0.0147523	0.0370401	Lhx6
ENSMUSG00000026889.12	627.984	-0.330194	0.116431	0.00425165	0.0122075	Rbm18
ENSMUSG00000026887.9	97.7013	-0.607336	0.275837	0.0223476	0.0535928	Mrrf
ENSMUSG00000047250.13	5.6432	1.28516	1.06326	0.053716	0.114208	Ptgs1
ENSMUSG00000083716.4	221.351	-0.153381	0.1809	0.388678	0.544801	Gm13436
ENSMUSG00000009030.14	1319.82	1.12593	0.0796759	1.22367e-45	4.13596e-44	Pdcl
ENSMUSG00000075376.10	1467.16	-0.132826	0.0779794	0.0874193	0.171333	Rc3h2
ENSMUSG00000066798.3	359.214	-0.178894	0.146776	0.21723	0.355113	Zbtb6
ENSMUSG00000050714.9	244.628	-0.605395	0.183131	0.00074825	0.00251155	Zbtb26
ENSMUSG00000035437.15	1300.31	0.0702363	0.0819635	0.390144	0.546157	Rabgap1
ENSMUSG00000026915.16	741.49	-0.135847	0.104121	0.189258	0.318982	Strbp
ENSMUSG00000107491.1	2.42779	-0.555526	1.04092	0.268765	NA	NA
ENSMUSG00000053164.6	3.61154	0.0456554	0.813092	0.927443	0.957244	Gpr21
ENSMUSG00000035403.10	6.64204	0.0903707	0.713453	0.862095	0.918681	Crb2
ENSMUSG00000035392.17	211.234	-0.0750795	0.178889	0.668802	0.786867	Dennd1a
ENSMUSG00000000247.11	18.7259	2.07501	0.644179	0.000220388	0.000810567	Lhx2
ENSMUSG00000026749.11	182.496	-1.12899	0.208076	3.02702e-08	1.87988e-07	Nek6
ENSMUSG00000026750.6	1152.25	0.0470831	0.0847852	0.577126	0.714286	Psmb7
ENSMUSG00000082931.1	15.9961	0.0602368	0.543327	0.89751	0.939241	Gm13586
ENSMUSG00000083722.2	4.98802	-0.377368	0.815592	0.475865	0.626809	Gpr144-ps
ENSMUSG00000063972.13	584.36	0.230094	0.111712	0.0382061	0.0853466	Nr6a1
ENSMUSG00000107468.1	4.70872	0.26052	0.792077	0.611882	0.743665	NA
ENSMUSG00000035295.10	7.58841	0.285406	0.702166	0.582051	0.718207	Wdr38
ENSMUSG00000062997.6	4381.57	-0.168293	0.0569141	0.00306149	0.00910841	Rpl35
ENSMUSG00000026755.14	522.082	-0.0448328	0.118538	0.702547	0.812186	Arpc5l
ENSMUSG00000026754.16	260.116	-0.30046	0.165284	0.0650573	0.134032	Golga1
ENSMUSG00000035236.17	297.26	-0.393728	0.157043	0.0110369	0.0286727	Scai
ENSMUSG00000082315.2	4.80178	0.485607	0.836106	0.364513	0.521298	Gm16523
ENSMUSG00000107955.1	4.93379	0.340989	0.815337	0.51148	0.659351	NA
ENSMUSG00000026753.5	1012.3	-0.164151	0.091253	0.0706755	0.143639	Ppp6c
ENSMUSG00000083240.3	174.198	-0.51744	0.207036	0.0106498	0.0277673	Gm13453
ENSMUSG00000082536.1	3582.22	0.019154	0.0650002	0.773096	0.86116	Gm13456
ENSMUSG00000049252.17	2.27697	-0.500208	1.02128	0.302596	NA	Lrp1b
ENSMUSG00000081999.3	289.799	0.13454	0.154439	0.377879	0.534736	Gm13461
ENSMUSG00000080994.2	4.40225	0.0419155	0.786757	0.935255	0.961874	Gm13464
ENSMUSG00000036890.13	135.941	0.252192	0.218057	0.236654	0.38002	Gtdc1
ENSMUSG00000083849.1	3.48339	0.723189	1.01178	0.195439	0.327032	Gm13477
ENSMUSG00000026872.18	2.11351	-0.447409	1.00145	0.342643	NA	Zeb2
ENSMUSG00000052155.5	333.7	0.55389	0.146636	0.000133216	0.000508266	Acvr2a
ENSMUSG00000026761.12	889.454	0.533123	0.0970983	3.38269e-08	2.08872e-07	Orc4
ENSMUSG00000036792.12	1154.65	3.86214	0.100174	0	0	Mbd5
ENSMUSG00000080937.1	22.7573	6.88236	1.35458	5.37424e-07	2.90838e-06	Gm13510
ENSMUSG00000081272.1	145.574	-0.0883255	0.216445	0.674845	0.791955	Gm13509
ENSMUSG00000069495.12	853.994	0.811352	0.0945872	6.68592e-18	9.2126e-17	Epc2
ENSMUSG00000026764.15	381.678	0.239748	0.140694	0.0855451	0.168323	Kif5c
ENSMUSG00000050447.15	21.4906	2.93906	0.666318	1.15578e-06	5.96364e-06	Lypd6
ENSMUSG00000026766.16	590.269	0.015555	0.113623	0.890733	0.935403	Mmadhc
ENSMUSG00000083449.1	2.15938	-0.162153	0.898879	0.717131	NA	Gm13487
ENSMUSG00000083270.1	907.367	9.70599	0.510983	3.95757e-79	2.33377e-77	Gm13498
ENSMUSG00000017144.8	567.401	1.40039	0.120521	1.1586e-31	2.69521e-30	Rnd3
ENSMUSG00000086007.1	5.75343	-0.328753	0.77888	0.532373	0.677283	1700057H21Rik
ENSMUSG00000087701.4	43.4254	-0.282303	0.37332	0.415513	0.570919	Gm13493
ENSMUSG00000036249.16	22.6647	-0.150867	0.496011	0.725376	0.828567	Rbm43
ENSMUSG00000026946.9	6.94236	0.200368	0.72874	0.699309	0.810085	Nmi
ENSMUSG00000053475.5	10.2996	-0.578835	0.704417	0.280164	0.430089	Tnfaip6
ENSMUSG00000036202.16	12353.6	-0.0990317	0.0569922	0.0827179	0.163722	Rif1
ENSMUSG00000026950.18	112.586	-0.0902628	0.248324	0.706555	0.814878	Neb
ENSMUSG00000036093.7	678.782	-0.436358	0.109154	5.72193e-05	0.000233462	Arl5a
ENSMUSG00000017412.15	4.9405	-0.230678	0.802896	0.646975	0.770673	Cacnb4
ENSMUSG00000025201.7	9.16213	-0.392792	0.692492	0.452295	0.606007	Bloc1s2-ps
ENSMUSG00000055371.17	927.581	0.396774	0.0913094	1.27585e-05	5.74312e-05	Stam2
ENSMUSG00000036053.17	281.294	0.4185	0.159525	0.00790133	0.0212566	Fmnl2
ENSMUSG00000061136.16	3123.93	0.642396	0.0607608	3.15121e-26	6.13205e-25	Prpf40a
ENSMUSG00000026960.6	682.029	0.0260858	0.109604	0.811768	0.886175	Arl6ip6
ENSMUSG00000083287.4	74.6528	-1.01944	0.318422	0.000759289	0.00254553	Gm13502
ENSMUSG00000075334.2	2.92039	0.19538	0.854739	0.68775	NA	Rprm
ENSMUSG00000026824.11	2.99079	-0.0912561	0.84361	0.847776	NA	Kcnj3
ENSMUSG00000026826.13	8.11027	0.062931	0.690511	0.904233	0.943821	Nr4a2
ENSMUSG00000026827.12	625.586	-0.402902	0.111919	0.00028963	0.00104561	Gpd2
ENSMUSG00000053472.3	7.96023	-0.933093	0.900448	0.124271	0.229007	Gm13534
ENSMUSG00000026836.15	157.523	0.43989	0.213533	0.034866	0.078811	Acvr1
ENSMUSG00000026839.17	3.54147	0.149962	0.833376	0.762925	0.854649	Upp2
ENSMUSG00000026991.20	787.704	0.0295715	0.102007	0.771418	0.860322	Pkp4
ENSMUSG00000087455.7	25.0529	-1.84291	0.628732	0.000819227	0.00273654	5330411J11Rik
ENSMUSG00000081157.1	99.3699	-0.558472	0.264229	0.0283432	0.0657444	Gm13552
ENSMUSG00000035168.16	1120.5	0.164019	0.0858882	0.0554212	0.117153	Tanc1
ENSMUSG00000026988.15	135.982	0.0701354	0.218509	0.743395	0.841098	Wdsub1
ENSMUSG00000026987.16	703.099	0.279075	0.104046	0.00700483	0.0190631	Baz2b
ENSMUSG00000085975.1	2.79894	0.0449557	0.851717	0.924717	NA	Gm13572
ENSMUSG00000026977.17	2567.15	-0.255903	0.0683238	0.00017145	0.000641277	2023-03-07
ENSMUSG00000060703.12	50.553	-0.636726	0.366211	0.0615873	0.127997	Cd302
ENSMUSG00000080198.2	2.24727	-0.125153	0.884177	0.78029	NA	Gm13573
ENSMUSG00000026980.15	1116.06	-0.668871	0.0907878	1.31951e-13	1.38151e-12	Ly75
ENSMUSG00000086196.7	2.97737	-0.614044	1.06289	0.221328	NA	Gm13571
ENSMUSG00000087283.1	48.6048	-0.0892079	0.349958	0.784854	0.868821	Gm13580
ENSMUSG00000054580.14	5.12838	0.483706	0.854662	0.362873	0.519905	Pla2r1
ENSMUSG00000026970.16	361.329	-1.06638	0.152314	1.70736e-12	1.62774e-11	Rbms1
ENSMUSG00000064289.15	152.148	0.108889	0.208651	0.594446	0.728912	Tank
ENSMUSG00000026914.15	1336.55	0.408128	0.0820227	5.91594e-07	3.17937e-06	Psmd14
ENSMUSG00000035033.15	3.56567	-0.184953	0.836608	0.704598	0.813529	Tbr1
ENSMUSG00000035000.8	115.555	-0.511514	0.248185	0.0330397	0.0751734	Dpp4
ENSMUSG00000026893.4	289.611	0.577604	0.158704	0.000220508	0.000810856	Gca
ENSMUSG00000081817.1	3.88424	1.11757	1.1925	0.0828341	0.163903	Gm13590
ENSMUSG00000059742.10	12.9773	0.0784216	0.584329	0.871954	0.924163	Kcnh7
ENSMUSG00000075324.13	6.23569	-0.0764613	0.737909	0.878365	0.927965	Fign
ENSMUSG00000082127.2	69.828	-0.375501	0.315081	0.209028	0.344638	Gm13577
ENSMUSG00000026888.14	8.49494	2.11717	1.01606	0.0051769	0.0145582	Grb14
ENSMUSG00000034903.18	43.8136	2.93664	0.446834	6.39308e-12	5.80403e-11	Cobll1
ENSMUSG00000057182.15	15.6545	-0.954303	0.655737	0.0728968	0.147483	Scn3a
ENSMUSG00000075318.13	6.02657	0.968167	0.927784	0.109346	0.206083	Scn2a1
ENSMUSG00000044647.16	679.183	5.51321	0.168634	4.40896e-235	7.249e-233	Csrnp3
ENSMUSG00000026994.9	73.0756	5.82633	0.548044	1.04641e-26	2.06945e-25	Galnt3
ENSMUSG00000034848.17	130.886	1.99429	0.23266	2.2649e-18	3.19806e-17	Ttc21b
ENSMUSG00000064329.13	11.7804	4.9066	1.18848	9.91512e-06	4.52194e-05	Scn1a
ENSMUSG00000027022.14	8.88502	0.821759	0.789427	0.145299	0.259166	Xirp2
ENSMUSG00000034780.6	15.8787	2.88938	0.729862	8.96535e-06	4.11004e-05	B3galt1
ENSMUSG00000027030.15	94.1369	1.52498	0.271787	6.63574e-09	4.47014e-08	Stk39
ENSMUSG00000075312.4	4.29654	-0.143432	0.797584	0.773749	0.861443	Gm13597
ENSMUSG00000027035.10	302.446	-1.70121	0.177404	3.0988e-22	5.18275e-21	Cers6
ENSMUSG00000034738.8	12.2343	0.977294	0.706395	0.0730461	0.147699	Nostrin
ENSMUSG00000005233.16	831.716	-0.294047	0.102226	0.00381306	0.0110811	Spc25
ENSMUSG00000027048.15	8.42498	0.430189	0.704034	0.413157	0.568486	Abcb11
ENSMUSG00000027070.14	181.891	0.615094	0.199709	0.0016783	0.00526958	Lrp2
ENSMUSG00000063145.10	115.416	-0.0443408	0.254392	0.855523	0.914213	Bbs5
ENSMUSG00000075307.3	20.6847	2.45628	0.624072	1.15949e-05	5.2412e-05	Klhl41
ENSMUSG00000027086.16	296.762	0.22969	0.151386	0.125205	0.230377	Fastkd1
ENSMUSG00000042133.16	4586.11	1.96471	0.0547426	1.19897e-282	2.25838e-280	Ppig
ENSMUSG00000082345.1	42.9631	3.86805	0.490937	5.68758e-16	6.96621e-15	Gm13622
ENSMUSG00000070883.3	23.4898	0.887004	0.51619	0.0483422	0.104372	Ccdc173
ENSMUSG00000027088.10	270.506	0.758569	0.157931	1.11473e-06	5.76575e-06	Phospho2
ENSMUSG00000042155.3	29.2244	0.11691	0.432574	0.766574	0.857243	Klhl23
ENSMUSG00000068882.13	3013.73	-0.204122	0.0643382	0.00146611	0.0046462	Ssb
ENSMUSG00000051730.15	237.096	-0.178663	0.175774	0.300884	0.453781	Mettl5
ENSMUSG00000085735.1	3.93154	-0.638317	0.972889	0.252364	0.398482	Mettl5os
ENSMUSG00000044308.17	2000.98	-0.0881631	0.0781358	0.256767	0.403309	Ubr3
ENSMUSG00000047965.9	36.1686	-0.237276	0.402166	0.520327	0.667121	Rpl9-ps7
ENSMUSG00000075304.2	7.24057	0.301465	0.718256	0.560451	0.700599	Sp5
ENSMUSG00000070880.10	92.6746	2.45093	0.296018	1.6646e-17	2.24425e-16	Gad1
ENSMUSG00000014959.12	816.169	0.285317	0.0969289	0.00311531	0.00924301	Gorasp2
ENSMUSG00000041997.16	1353.88	-0.118574	0.0805774	0.139898	0.251989	Tlk1
ENSMUSG00000041975.17	173.626	1.30864	0.204045	6.23278e-11	5.16761e-10	Mettl8
ENSMUSG00000041966.18	509.887	0.384797	0.119447	0.00117213	0.0037983	Dcaf17
ENSMUSG00000027015.4	25.6328	0.919114	0.488838	0.0328016	0.074693	Cybrd1
ENSMUSG00000027012.15	832.018	-0.0426265	0.10244	0.674882	0.791955	Dync1i2
ENSMUSG00000027010.16	248.837	-0.154329	0.166254	0.346301	0.502561	Slc25a12
ENSMUSG00000027018.11	4494.97	-0.774758	0.0555134	2.00662e-44	6.59764e-43	Hat1
ENSMUSG00000086846.2	6.86271	0.409415	0.74632	0.441167	0.595248	Gm13642
ENSMUSG00000041921.16	176.435	-0.679121	0.203314	0.000648949	0.0022065	Metap1d
ENSMUSG00000084946.2	8.59956	-0.254686	0.682066	0.618801	0.74823	Dlx1as
ENSMUSG00000041911.3	7.03157	0.0550259	0.700431	0.915875	0.950107	Dlx1
ENSMUSG00000064263.6	15.4604	-1.47499	0.759917	0.0153391	0.0383004	Gm1631
ENSMUSG00000087570.1	2.94932	-0.745199	1.12473	0.184129	NA	Gm13647
ENSMUSG00000027111.16	1034.06	-0.12247	0.0905188	0.173905	0.298817	Itga6
ENSMUSG00000086641.1	5.65597	-0.261127	0.765588	0.614411	0.745058	Gm13663
ENSMUSG00000006494.11	488.002	-0.312182	0.123166	0.0106308	0.0277214	Pdk1
ENSMUSG00000004085.14	272.803	-0.470392	0.166134	0.00407803	0.0117647	Zak
ENSMUSG00000055612.15	1036.65	-0.416942	0.0903254	3.57878e-06	1.7345e-05	Cdca7
ENSMUSG00000081957.5	37.021	-0.0228725	0.392065	0.948235	0.969064	Ak3l2-ps
ENSMUSG00000085252.1	6.46757	6.59594	2.71208	3.87795e-05	0.000162392	8430437L04Rik
ENSMUSG00000027109.16	1730.98	-0.151879	0.0738034	0.0389677	0.0867784	Sp3
ENSMUSG00000063714.15	33.0242	1.5889	0.460816	0.000151682	0.000572082	Sp3os
ENSMUSG00000027108.15	889.126	-0.178315	0.0992792	0.0708057	0.143828	Ola1
ENSMUSG00000041777.12	308.667	0.0546208	0.149296	0.712248	0.818961	Cir1
ENSMUSG00000008226.14	231.149	-0.740774	0.180183	2.94453e-05	0.000125691	Scrn3
ENSMUSG00000041762.16	6.59144	0.264055	0.740737	0.610056	0.742017	Gpr155
ENSMUSG00000075284.10	45.0989	-0.149088	0.369054	0.662797	0.782644	Wipf1
ENSMUSG00000027107.3	3.33906	0.548106	0.980827	0.289599	0.441152	Chrna1
ENSMUSG00000056486.18	161.5	0.20798	0.202489	0.294466	0.446707	Chn1
ENSMUSG00000027104.18	5121.8	2.71102	0.0560197	0	0	Atf2
ENSMUSG00000018770.9	1992.77	-0.0606457	0.0701117	0.384394	0.540957	Atp5g3
ENSMUSG00000009207.15	543.88	0.369864	0.122463	0.0023208	0.00707286	Lnp
ENSMUSG00000075279.5	24.0398	-0.220176	0.479562	0.601058	0.734477	Mrpl23-ps1
ENSMUSG00000001819.4	95.0535	3.89838	0.326054	7.961e-34	1.98015e-32	Hoxd13
ENSMUSG00000042499.13	13.3534	3.6936	0.88706	4.34625e-06	2.08407e-05	Hoxd11
ENSMUSG00000043342.9	33.6116	2.11998	0.467131	1.00044e-06	5.20782e-06	Hoxd9
ENSMUSG00000027102.4	32.4216	2.6826	0.497293	9.89691e-09	6.52651e-08	Hoxd8
ENSMUSG00000042448.5	8.90064	3.86879	1.15043	0.000105219	0.000408965	Hoxd1
ENSMUSG00000027099.9	480.11	-0.0212836	0.126378	0.864386	0.919657	Mtx2
ENSMUSG00000081406.4	4106.87	0.049531	0.0567592	0.381613	0.538371	Rps6-ps4
ENSMUSG00000082152.1	4.05211	0.41594	0.855299	0.425096	0.579815	Gm13655
ENSMUSG00000059005.13	11004.5	-0.581582	0.0474268	1.13057e-34	2.9052e-33	Hnrnpa3
ENSMUSG00000015839.6	1731.69	0.251638	0.0735551	0.000606073	0.00207083	Nfe2l2
ENSMUSG00000089015.1	1.6956	-0.30748	0.966142	0.478262	NA	Gm24996
ENSMUSG00000086813.1	3.76796	1.29956	1.31981	0.0586843	0.122806	Gm13657
ENSMUSG00000042410.16	1846.43	-0.248006	0.0732148	0.000678397	0.00230138	Agps
ENSMUSG00000075273.4	751.851	5.25766	0.151784	1.35821e-263	2.43987e-261	Ttc30b
ENSMUSG00000075272.4	17.2641	0.65611	0.574554	0.171082	0.294749	Ttc30a2
ENSMUSG00000075271.4	118.622	0.0203962	0.23439	0.929746	0.958857	Ttc30a1
ENSMUSG00000075270.11	2.37488	0.111181	0.870557	0.810704	NA	Pde11a
ENSMUSG00000056436.4	23.5438	0.153453	0.473146	0.716211	0.822299	Cyct
ENSMUSG00000042369.8	300.345	0.0985491	0.153044	0.515256	0.662853	Rbm45
ENSMUSG00000042359.18	60.8334	1.54709	0.335142	1.2108e-06	6.22768e-06	Osbpl6
ENSMUSG00000002731.6	121.816	-0.100954	0.231787	0.653815	0.775963	Prkra
ENSMUSG00000002732.14	41.7777	-0.692974	0.40081	0.0597172	0.124725	Fkbp7
ENSMUSG00000002733.8	355.884	-0.0807294	0.140687	0.56156	0.701443	Plekha3
ENSMUSG00000051747.15	453.332	-0.230592	0.127937	0.0691215	0.140997	Ttn
ENSMUSG00000044033.16	43.7503	-0.158583	0.384884	0.654072	0.776173	Ccdc141
ENSMUSG00000042272.17	127.859	0.566364	0.230119	0.0113887	0.0294721	Sestd1
ENSMUSG00000081611.1	2.40942	0.101677	0.868363	0.826825	NA	Gm13651
ENSMUSG00000027014.14	12715.1	4.32987	0.0480609	0	0	Cwc22
ENSMUSG00000082701.1	8.33676	0.530859	0.722877	0.318608	0.473373	Gm14460
ENSMUSG00000027011.14	335.682	-0.219113	0.145705	0.128444	0.235245	Ube2e3
ENSMUSG00000027009.18	12.8799	-0.58604	0.646058	0.254477	0.400674	Itga4
ENSMUSG00000075256.9	8.82661	-0.306643	0.716425	0.550485	0.692919	Cerkl
ENSMUSG00000034701.9	4.90716	0.977939	1.06085	0.111277	0.209075	Neurod1
ENSMUSG00000027007.16	611.11	0.471415	0.10908	1.3638e-05	6.10783e-05	Ssfa2
ENSMUSG00000027006.13	883.532	-0.291008	0.0962006	0.00237351	0.00722102	Dnajc10
ENSMUSG00000027002.13	1635.74	-0.211944	0.0760514	0.00517898	0.0145619	Nckap1
ENSMUSG00000027001.10	29.8639	-0.0413123	0.430276	0.914192	0.94895	Dusp19
ENSMUSG00000026999.14	748.693	-0.0521187	0.102894	0.610033	0.742017	Nup35
ENSMUSG00000106252.1	12.9609	-0.922428	0.710497	0.0959039	0.184898	NA
ENSMUSG00000086436.2	61.8747	-0.777228	0.339642	0.0153414	0.0383011	Gm13690
ENSMUSG00000064193.8	2455.41	0.133122	0.0647792	0.0395541	0.0878825	Gm4735
ENSMUSG00000081400.1	56.5746	-0.279374	0.335856	0.3774	0.534379	Gm13680
ENSMUSG00000027091.14	2108.03	0.0338691	0.0728212	0.641218	0.765449	Zc3h15
ENSMUSG00000027087.11	738.745	0.136256	0.101651	0.17821	0.30454	Itgav
ENSMUSG00000085335.1	3.00212	0.160393	0.847008	0.742034	NA	Gm13684
ENSMUSG00000048388.3	110.077	4.59788	0.341157	2.8334e-42	8.76726e-41	Fam171b
ENSMUSG00000034552.8	139.842	12.0597	3.04916	3.14161e-15	3.68949e-14	Zswim2
ENSMUSG00000094125.1	116.933	6.69484	0.546476	2.38138e-34	6.06314e-33	Gm13698
ENSMUSG00000094336.1	116.933	6.69484	0.546476	2.38138e-34	6.06314e-33	Gm13693
ENSMUSG00000096729.1	115.435	6.67551	0.546846	4.08301e-34	1.02742e-32	Gm13695
ENSMUSG00000096484.1	115.83	6.68101	0.546709	3.48336e-34	8.79956e-33	Gm13696
ENSMUSG00000096337.1	114.883	6.66855	0.546988	4.95667e-34	1.24565e-32	Gm13694
ENSMUSG00000095824.1	114.332	6.66157	0.547148	6.03847e-34	1.50388e-32	Gm13697
ENSMUSG00000079247.2	114.332	6.66157	0.547148	6.03847e-34	1.50388e-32	Gm13691
ENSMUSG00000027082.15	283.47	-0.565943	0.161077	0.000365884	0.00129606	Tfpi
ENSMUSG00000087362.7	9.55209	-0.0281001	0.646804	0.953337	0.971617	Gm13710
ENSMUSG00000118521.1	4.98802	-0.377368	0.815592	0.475865	0.626809	NA
ENSMUSG00000034101.14	365.193	0.469554	0.144214	0.00101329	0.00332351	Ctnnd1
ENSMUSG00000086598.9	38.5994	0.119154	0.385085	0.73945	0.838559	Btbd18
ENSMUSG00000076437.10	1183.47	-0.190998	0.0845931	0.0234252	0.0557908	2700094K13Rik
ENSMUSG00000050043.16	1034.58	0.0424492	0.0961309	0.657902	0.779399	Tmx2
ENSMUSG00000027080.6	662.826	0.707909	0.106384	2.19837e-11	1.89811e-10	Med19
ENSMUSG00000034075.10	1125.28	0.0376178	0.0856054	0.659661	0.780566	Zdhhc5
ENSMUSG00000027079.15	2631.78	2.68468	0.0656129	0	0	Clp1
ENSMUSG00000034059.14	37.8189	-0.844736	0.427303	0.0300668	0.0692046	Ypel4
ENSMUSG00000097187.1	8.89536	1.22906	0.841562	0.0445728	0.0972074	Gm19426
ENSMUSG00000023224.12	118.834	1.21292	0.237875	1.49885e-07	8.60839e-07	Serping1
ENSMUSG00000027078.14	49.1073	-1.14433	0.395327	0.00185701	0.00577741	Ube2l6
ENSMUSG00000027077.7	39.1717	-1.85829	0.490187	4.13113e-05	0.000172324	Smtnl1
ENSMUSG00000027076.10	233.76	0.158416	0.169274	0.34253	0.498718	Timm10
ENSMUSG00000027075.16	67.7851	0.0691884	0.308368	0.814905	0.887869	Slc43a1
ENSMUSG00000027074.14	64.6972	1.4382	0.349859	1.25548e-05	5.66059e-05	Slc43a3
ENSMUSG00000027071.14	3.62287	0.301932	0.843166	0.550382	0.692875	P2rx3
ENSMUSG00000027067.16	2950.32	-0.18899	0.063309	0.00277654	0.00833605	Ssrp1
ENSMUSG00000033955.13	392.643	0.710692	0.13807	2.04089e-07	1.15979e-06	Tnks1bp1
ENSMUSG00000082028.1	6.34712	-0.357046	0.767979	0.496537	0.64562	Gm1826
ENSMUSG00000025839.3	184.614	2.99201	0.217146	4.75191e-44	1.54684e-42	Pramel7
ENSMUSG00000025838.12	150.201	2.59661	0.231181	3.67476e-30	8.10159e-29	Pramel6
ENSMUSG00000081762.1	3.97169	0.176118	0.806099	0.727235	0.829565	Gm13738
ENSMUSG00000082908.4	23.492	-0.132997	0.475582	0.750555	0.84601	Gm13736
ENSMUSG00000061520.4	6.82366	-2.39081	1.51675	0.0199665	0.0484515	Olfr153
ENSMUSG00000080223.2	4.27333	0.0874152	0.787332	0.863457	0.919173	Gm13768
ENSMUSG00000085547.4	6.87459	0.0369685	0.706064	0.944287	0.966913	Gm13767
ENSMUSG00000025314.16	272.442	-0.213427	0.16208	0.182271	0.309871	Ptprj
ENSMUSG00000051329.13	1901.31	-0.134707	0.070821	0.0568675	0.119779	Nup160
ENSMUSG00000008200.15	1752.33	0.440476	0.0717478	7.48655e-10	5.59286e-09	Fnbp4
ENSMUSG00000040812.14	8.52234	0.0676112	0.692335	0.895399	0.93774	Agbl2
ENSMUSG00000080977.1	5.71317	0.124135	0.74058	0.810418	0.885748	Gm13772
ENSMUSG00000027282.17	1949.06	-0.201528	0.0698441	0.00378903	0.0110178	Mtch2
ENSMUSG00000040794.5	8.14667	1.10975	0.861316	0.0668626	0.137081	C1qtnf4
ENSMUSG00000005510.9	535.028	-0.14546	0.117896	0.213996	0.351038	Ndufs3
ENSMUSG00000005505.12	87.7317	-0.110897	0.272667	0.67167	0.788949	Kbtbd4
ENSMUSG00000063235.16	129.884	-0.367057	0.230503	0.102127	0.19471	Ptpmt1
ENSMUSG00000005506.16	3568.69	-0.398784	0.0583329	7.4451e-12	6.70578e-11	Celf1
ENSMUSG00000082108.3	18.1157	1.84501	0.63442	0.00072605	0.0024472	Gm13777
ENSMUSG00000002104.11	50.9179	-0.356827	0.357053	0.286494	0.437694	Rapsn
ENSMUSG00000086495.7	3.59978	-1.01982	1.26826	0.116933	0.217787	Gm13778
ENSMUSG00000002102.15	1951.49	0.0187805	0.0718569	0.793158	0.873889	Psmc3
ENSMUSG00000002105.15	133.56	-0.352294	0.240926	0.132861	0.241737	Slc39a13
ENSMUSG00000002111.8	28.4585	-0.840659	0.49585	0.0536474	0.114087	Spi1
ENSMUSG00000002100.15	6.37539	0.761464	0.845212	0.182252	0.309871	Mybpc3
ENSMUSG00000040687.16	111.669	-0.495291	0.249953	0.040929	0.0904607	Madd
ENSMUSG00000002108.10	7.45563	0.0143643	0.6922	0.979236	0.987189	Nr1h3
ENSMUSG00000002103.16	197.971	-0.71539	0.203835	0.000323044	0.00115592	Acp2
ENSMUSG00000002109.14	97.2126	-0.125002	0.261508	0.619421	0.748886	Ddb2
ENSMUSG00000027257.13	77.4013	0.196134	0.285853	0.474776	0.625883	Pacsin3
ENSMUSG00000027255.14	426.361	-0.0180018	0.129833	0.888183	0.933865	Arfgap2
ENSMUSG00000040591.18	185.778	-0.340734	0.192556	0.0713707	0.144782	1110051M20Rik
ENSMUSG00000027253.15	107.137	-0.0852376	0.247961	0.722333	0.826505	Lrp4
ENSMUSG00000040549.16	2411.26	0.172598	0.0674113	0.0103436	0.027049	Ckap5
ENSMUSG00000027249.15	27.9851	-0.271912	0.458364	0.506157	0.654968	F2
ENSMUSG00000075040.9	378.954	-0.20132	0.138831	0.143134	0.256507	Zfp408
ENSMUSG00000027247.16	829.35	-0.206003	0.105531	0.0493845	0.106268	Arhgap1
ENSMUSG00000027244.14	1276.34	0.389192	0.0811775	1.51227e-06	7.67046e-06	Atg13
ENSMUSG00000027243.8	117.697	-0.344875	0.238145	0.135878	0.246303	Harbi1
ENSMUSG00000082457.1	3.0656	-0.793422	1.14847	0.168908	NA	Gm13776
ENSMUSG00000040506.16	971.297	0.751252	0.0898988	4.82058e-17	6.32347e-16	Ambra1
ENSMUSG00000040495.4	9.30039	1.81062	0.911694	0.00841014	0.0224714	Chrm4
ENSMUSG00000027239.14	566.962	-0.147637	0.116515	0.201785	0.33531	Mdk
ENSMUSG00000040479.12	655.681	1.00861	0.109682	2.20693e-20	3.42807e-19	Dgkz
ENSMUSG00000095332.2	14.7423	0.0345708	0.59123	0.944221	0.966913	Gm9821
ENSMUSG00000027230.9	21.5462	0.067043	0.492565	0.878538	0.928047	Creb3l1
ENSMUSG00000058318.15	180.78	0.0565109	0.192337	0.76507	0.856351	Phf21a
ENSMUSG00000040434.16	102.148	-0.679103	0.263797	0.00760514	0.0205326	Gyltl1b
ENSMUSG00000027222.14	122.657	0.491535	0.23984	0.0351238	0.0793384	Pex16
ENSMUSG00000044916.10	6.4558	1.08184	0.940362	0.0810903	0.161109	1700029I15Rik
ENSMUSG00000027223.15	107.833	0.294984	0.244641	0.214063	0.351119	Mapk8ip1
ENSMUSG00000068742.11	191.635	1.08626	0.191382	7.49565e-09	5.02498e-08	Cry2
ENSMUSG00000084781.1	2.39193	-0.235046	0.901428	0.612976	NA	D930015M05Rik
ENSMUSG00000049922.8	81.5636	-0.235217	0.289449	0.395276	0.550784	Slc35c1
ENSMUSG00000027220.2	1.99723	-0.406717	0.989566	0.376457	NA	Syt13
ENSMUSG00000075028.12	32.4111	0.574865	0.431017	0.139134	0.250751	Prdm11
ENSMUSG00000068735.14	137.215	-1.34432	0.247749	2.35299e-08	1.48456e-07	Trp53i11
ENSMUSG00000027217.13	65.1965	3.29147	0.370937	8.75819e-20	1.31515e-18	Tspan18
ENSMUSG00000027215.13	11.1253	-0.187199	0.623253	0.704434	0.813529	Cd82
ENSMUSG00000027198.16	388.928	-0.331074	0.138018	0.0154038	0.0384272	Ext2
ENSMUSG00000040272.14	51.6408	-0.0374581	0.349303	0.907883	0.945767	Accs
ENSMUSG00000075023.11	93.8534	-1.60069	0.305116	5.25345e-08	3.18308e-07	Accsl
ENSMUSG00000083009.1	2.96681	-0.342197	0.90165	0.485238	NA	Gm1335
ENSMUSG00000087006.3	2.21845	-0.926915	1.43824	0.0729425	NA	Gm13889
ENSMUSG00000027196.11	9.65229	0.0823577	0.676303	0.871791	0.924163	4921507L20Rik
ENSMUSG00000040174.14	141.732	-0.343355	0.222499	0.113143	0.211718	Alkbh3
ENSMUSG00000027195.10	1375.4	1.05347	0.0784879	2.60285e-41	7.86573e-40	Hsd17b12
ENSMUSG00000027194.16	247.67	0.13341	0.166668	0.417896	0.572873	Ttc17
ENSMUSG00000081476.1	36.6256	-0.497507	0.430172	0.203635	0.337813	Itpa-ps1
ENSMUSG00000045464.5	15.693	0.471846	0.577744	0.326739	0.482201	2810002D19Rik
ENSMUSG00000027193.12	2884.2	0.43275	0.0612639	1.46632e-12	1.40346e-11	Api5
ENSMUSG00000082820.3	2.892	0.288988	0.879773	0.552273	NA	Gm13803
ENSMUSG00000075015.3	271.842	7.15629	0.414985	1.85956e-66	9.04192e-65	Gm10801
ENSMUSG00000075014.1	3736.95	6.56791	0.114267	0	0	Gm10800
ENSMUSG00000027165.16	52.8481	-0.679506	0.358821	0.0429455	0.094156	B230118H07Rik
ENSMUSG00000027164.8	462.566	0.326974	0.127972	0.00994407	0.0261133	Traf6
ENSMUSG00000032841.15	12.0946	-0.912536	0.752343	0.106699	0.202143	Prr5l
ENSMUSG00000027163.13	184.151	-0.681311	0.201078	0.000542727	0.00186626	Commd9
ENSMUSG00000048058.17	119.934	-1.133	0.259201	5.99894e-06	2.82078e-05	Ldlrad3
ENSMUSG00000027189.16	471.557	0.862287	0.126203	5.47846e-12	5.00884e-11	Trim44
ENSMUSG00000075012.4	31.7466	3.41227	0.532915	1.90366e-11	1.65396e-10	Fjx1
ENSMUSG00000005087.17	3.10574	0.13325	0.840835	0.784455	NA	Cd44
ENSMUSG00000010914.10	606.878	0.262576	0.115216	0.0217526	0.0523017	Pdhx
ENSMUSG00000010911.12	112.592	0.433099	0.240147	0.0633899	0.13107	Apip
ENSMUSG00000012350.15	3.14776	-0.0663671	0.840379	0.887625	NA	Ehf
ENSMUSG00000027187.10	811.798	-0.408035	0.0998551	4.02527e-05	0.000168198	Cat
ENSMUSG00000032724.5	116.855	1.4082	0.239427	1.48321e-09	1.07372e-08	Abtb2
ENSMUSG00000027185.15	1597.29	-0.215512	0.0773125	0.00516522	0.0145317	Nat10
ENSMUSG00000027184.14	7436.7	-0.1335	0.0505628	0.00821936	0.0220224	Caprin1
ENSMUSG00000032698.15	8.73321	0.995914	0.809853	0.0883625	0.17278	Lmo2
ENSMUSG00000027180.12	566.708	-0.296019	0.116511	0.0105063	0.0274116	Fbxo3
ENSMUSG00000087739.1	2.69356	-0.320753	0.912338	0.506234	NA	Gm24644
ENSMUSG00000068686.12	19.0623	-0.495639	0.543577	0.283617	0.434358	Cd59b
ENSMUSG00000032679.12	78.9621	0.554471	0.284111	0.0414731	0.0914999	Cd59a
ENSMUSG00000068373.15	42.0065	0.517879	0.379168	0.140875	0.253349	D430041D05Rik
ENSMUSG00000087473.7	4.40665	-0.231784	0.805479	0.649653	0.77244	Gm13883
ENSMUSG00000027177.14	435.956	0.464188	0.131232	0.000358022	0.00126983	Hipk3
ENSMUSG00000086454.7	694.933	0.0855902	0.106311	0.418432	0.573387	4930500J02Rik
ENSMUSG00000027176.8	950.295	0.313571	0.091754	0.000595724	0.00203839	Cstf3
ENSMUSG00000027175.10	64.9182	0.381479	0.315917	0.204464	0.338899	Tcp11l1
ENSMUSG00000027173.7	406.053	2.32441	0.137375	5.40478e-65	2.5451e-63	Depdc7
ENSMUSG00000074994.6	755.306	-0.415655	0.103312	5.21538e-05	0.000213874	Qser1
ENSMUSG00000083856.1	3.77941	-0.304728	0.84938	0.547793	0.690751	Gm13886
ENSMUSG00000027171.10	80.7616	-1.27496	0.319409	2.7832e-05	0.000119172	Prrg4
ENSMUSG00000045106.12	47.1703	-0.255855	0.382247	0.467	0.619209	Ccdc73
ENSMUSG00000027170.12	2605.92	-0.0497779	0.064889	0.441521	0.595643	Eif3m
ENSMUSG00000016458.15	19.6281	5.79089	1.09377	6.68642e-08	3.99821e-07	Wt1
ENSMUSG00000005973.6	1015	0.155303	0.0907826	0.0858513	0.168754	Rcn1
ENSMUSG00000080859.1	172.282	-0.155947	0.198081	0.421835	0.576705	Rpl10-ps1
ENSMUSG00000027168.21	7.9897	1.08972	0.857018	0.0710706	0.144276	Pax6
ENSMUSG00000027167.11	186.396	0.368553	0.187746	0.0457412	0.0995206	Elp4
ENSMUSG00000042670.5	180.054	0.227012	0.196595	0.240166	0.383906	Immp1l
ENSMUSG00000027166.14	118.911	-0.124997	0.234144	0.582784	0.718746	Dnajc24
ENSMUSG00000074981.13	302.256	8.49683	0.592714	1.35677e-45	4.56991e-44	Dcdc5
ENSMUSG00000085218.7	14.4055	1.40093	0.692194	0.0121385	0.0312125	BB218582
ENSMUSG00000016386.15	36.6829	0.633013	0.417301	0.0967816	0.186239	Mpped2
ENSMUSG00000027122.15	658.237	0.621224	0.107044	5.16643e-09	3.52193e-08	Arl14ep
ENSMUSG00000083424.3	203.839	-0.00231068	0.18401	0.988871	0.993222	Rpl35a-ps4
ENSMUSG00000063684.9	70.7561	0.357733	0.296846	0.20687	0.341893	Gm13910
ENSMUSG00000057234.9	66.5513	1.06018	0.311026	0.000336257	0.00119943	Mettl15
ENSMUSG00000027115.14	979.185	-0.019977	0.0920479	0.826521	0.894579	Kif18a
ENSMUSG00000048482.14	63.0443	4.24161	0.420836	1.09874e-24	2.02822e-23	Bdnf
ENSMUSG00000027162.7	1946.63	-0.279995	0.0730656	0.000121372	0.000466099	Lin7c
ENSMUSG00000063751.6	8.74895	0.924469	0.790748	0.106607	0.20206	Gm13939
ENSMUSG00000050199.13	767.603	1.35838	0.10143	2.8375e-41	8.56149e-40	Lgr4
ENSMUSG00000027160.16	220.096	-0.380562	0.181492	0.0330522	0.0751841	Ccdc34
ENSMUSG00000074968.11	48.1621	-1.62383	0.425771	4.34557e-05	0.000180532	Ano3
ENSMUSG00000084933.1	92.6002	11.386	2.98389	9.7606e-14	1.03365e-12	Gm13962
ENSMUSG00000063844.5	128.611	9.5544	1.30346	2.04824e-12	1.94223e-11	Olfr1276
ENSMUSG00000074965.5	108.854	11.6596	3.0136	2.55841e-14	2.83633e-13	Olfr1277
ENSMUSG00000081037.3	3.03721	-0.685346	1.08458	0.197	NA	Gm13929
ENSMUSG00000027134.4	451.781	3.78711	0.149714	4.78661e-142	5.10248e-140	Lpcat4
ENSMUSG00000041358.1	2.9436	-0.0726356	0.843422	0.877742	NA	Nutm1
ENSMUSG00000027133.3	524.139	0.00740054	0.119532	0.951151	0.970882	Nop10
ENSMUSG00000027130.15	266.835	-0.477815	0.164664	0.00322887	0.00955802	Slc12a6
ENSMUSG00000027131.3	433.06	0.447843	0.129769	0.000503676	0.00174	Emc4
ENSMUSG00000027132.3	1100.12	1.3108	0.0876174	5.15826e-51	1.94321e-49	Katnbl1
ENSMUSG00000055943.5	413.118	0.221908	0.137412	0.102892	0.195976	Emc7
ENSMUSG00000003604.14	173.936	-0.10478	0.198693	0.589547	0.725013	Aven
ENSMUSG00000057378.15	149.66	3.35491	0.244497	8.02606e-44	2.59091e-42	Ryr3
ENSMUSG00000044042.19	197.745	1.75922	0.189152	3.53828e-21	5.66855e-20	Fmn1
ENSMUSG00000087106.1	562.304	10.879	0.971184	4.21941e-27	8.43925e-26	Gm13964
ENSMUSG00000041219.14	1521.43	0.33729	0.075375	7.28588e-06	3.39221e-05	Arhgap11a
ENSMUSG00000096006.1	231.327	-0.224707	0.173968	0.189772	0.319652	Gm21596
ENSMUSG00000040383.16	9272.32	3.43647	0.0494374	0	0	Aqr
ENSMUSG00000040321.3	517.081	0.568888	0.124438	3.97115e-06	1.91462e-05	Zfp770
ENSMUSG00000101266.1	6.46757	6.59594	2.71208	3.87795e-05	0.000162392	Gm29234
ENSMUSG00000057147.13	269.621	-0.0839091	0.160423	0.600254	0.733854	Dph6
ENSMUSG00000040282.13	255.622	-0.441897	0.170535	0.00852684	0.0227551	BC052040
ENSMUSG00000027210.20	130.613	-1.32443	0.25092	5.49e-08	3.32019e-07	Meis2
ENSMUSG00000081787.1	9.14992	0.00779938	0.654791	0.98935	0.993395	Gm13991
ENSMUSG00000027351.14	446.366	-0.405584	0.13962	0.00329669	0.00974393	Spred1
ENSMUSG00000027349.5	418.941	0.903239	0.130345	2.70174e-12	2.53219e-11	Fam98b
ENSMUSG00000027347.18	79.9019	-0.196083	0.282717	0.46928	0.621297	Rasgrp1
ENSMUSG00000040152.8	76.5884	3.51839	0.345937	3.22325e-25	6.0654e-24	Thbs1
ENSMUSG00000027344.14	1.73014	-0.317191	0.968048	0.466715	NA	Fsip1
ENSMUSG00000005102.13	315.839	-0.329214	0.154041	0.0304354	0.0699204	Eif2ak4
ENSMUSG00000009549.14	672.001	-0.547218	0.111471	7.79292e-07	4.12486e-06	Srp14
ENSMUSG00000040093.16	80.4139	0.784026	0.282052	0.00370277	0.010801	Bmf
ENSMUSG00000040084.9	2631.32	0.460001	0.0636921	4.56375e-13	4.59239e-12	Bub1b
ENSMUSG00000074923.10	8.73289	-0.492436	0.721279	0.3573	0.514546	Pak6
ENSMUSG00000074918.4	51.372	0.960541	0.355444	0.00392226	0.011361	Inafm2
ENSMUSG00000045838.8	6.87943	0.279835	0.725237	0.590465	0.72575	A430105I19Rik
ENSMUSG00000040035.14	4.44724	2.80871	1.60282	0.00751666	0.0203333	Disp2
ENSMUSG00000027331.15	340.95	-0.0548966	0.144875	0.701282	0.811348	Knstrn
ENSMUSG00000086421.1	6.37419	-0.209943	0.740995	0.683367	0.79805	Gm14091
ENSMUSG00000027332.11	500.299	0.368445	0.119892	0.00196206	0.00606628	Ivd
ENSMUSG00000040007.8	262.617	0.96571	0.161795	1.45709e-09	1.0552e-08	Bahd1
ENSMUSG00000074916.5	37.5279	0.108725	0.401619	0.768963	0.858776	Chst14
ENSMUSG00000039983.13	85.7767	-0.624519	0.286572	0.0226751	0.0542776	Ccdc32
ENSMUSG00000027324.1	309.734	0.860058	0.152519	1.1696e-08	7.64278e-08	Rpusd2
ENSMUSG00000027326.13	877.961	0.174042	0.102797	0.0886812	0.173246	Casc5
ENSMUSG00000027323.10	667.355	-0.527605	0.111021	1.70649e-06	8.59716e-06	Rad51
ENSMUSG00000070730.11	370.751	0.107938	0.140428	0.437931	0.592503	Rmdn3
ENSMUSG00000046814.3	3.12412	-0.453785	0.937094	0.377662	NA	Gchfr
ENSMUSG00000034278.3	76.0486	-0.366429	0.292432	0.1899	0.319731	Dnajc17
ENSMUSG00000055926.3	8.14063	-0.122374	0.681935	0.807891	0.884182	Gm14137
ENSMUSG00000068580.11	82.6557	-0.865784	0.301358	0.0026575	0.00801464	Zfyve19
ENSMUSG00000027317.8	26.0778	0.358255	0.476901	0.393514	0.549329	Ppp1r14d
ENSMUSG00000027315.13	362.875	-0.0296546	0.144316	0.834872	0.899753	Spint1
ENSMUSG00000034226.7	27.3973	-0.867791	0.503294	0.0505719	0.108474	Rhov
ENSMUSG00000034216.12	454.754	0.278377	0.132499	0.0339482	0.0769653	Vps18
[truncated: 18,600 more rows]
