# Supplementary material for: Obox4 promotes zygotic genome activation upon loss of Dux
Source: eLife. 2024 Jun 24;13:e95856. doi: 10.7554/eLife.95856 (PMC11196112; doi:10.7554/eLife.95856)
Supplement: Supplementary file 3. [file elife-95856-supp3.xlsx]

## Sheet: Supplementary_Table_4
# Supplementary Table 3
# Genes targeted by OBOX4 and DUX
	geneId	SYMBOL	targetBy
1	ENSMUSG00000025903	Lypla1	Obox4
3	ENSMUSG00000085623	Gm16041	Obox4
4	ENSMUSG00000025907	Rb1cc1	Obox4
6	ENSMUSG00000097797	NA	Obox4
7	ENSMUSG00000103067	NA	Obox4
8	ENSMUSG00000103557	NA	Obox4
9	ENSMUSG00000025911	Adhfe1	Obox4
10	ENSMUSG00000025912	Mybl1	Obox4
11	ENSMUSG00000093178	Snord87	Obox4
13	ENSMUSG00000025917	Cops5	Obox4
14	ENSMUSG00000056763	Cspp1	Obox4
15	ENSMUSG00000057715	A830018L16Rik	Obox4
16	ENSMUSG00000016918	Sulf1	Obox4
17	ENSMUSG00000104518	NA	Obox4
18	ENSMUSG00000042414	Prdm14	Obox4
19	ENSMUSG00000005886	Ncoa2	Obox4
21	ENSMUSG00000102166	NA	Obox4
23	ENSMUSG00000077377	Gm25168	Obox4
25	ENSMUSG00000025921	Rdh10	Obox4
27	ENSMUSG00000079658	Eloc	Obox4
29	ENSMUSG00000041859	Mcm3	Obox4
31	ENSMUSG00000041779	Tram2	Obox4
33	ENSMUSG00000086194	NA	Obox4
34	ENSMUSG00000094926	NA	Obox4
35	ENSMUSG00000102766	NA	Obox4
36	ENSMUSG00000026158	Ogfrl1	Obox4
38	ENSMUSG00000048874	Phf3	Obox4
40	ENSMUSG00000117310	Ptp4a1	Obox4
41	ENSMUSG00000026058	Khdrbs2	Obox4
43	ENSMUSG00000105982	Mir6896	Obox4
44	ENSMUSG00000026127	Imp4	Obox4
45	ENSMUSG00000026126	Ptpn18	Obox4
46	ENSMUSG00000100280	NA	Obox4
48	ENSMUSG00000045216	Hs6st1	Obox4
49	ENSMUSG00000037470	Uggt1	Obox4
50	ENSMUSG00000037447	Arid5a	Obox4
51	ENSMUSG00000102762	NA	Obox4
52	ENSMUSG00000010453	Kansl3	Obox4
54	ENSMUSG00000001138	Cnnm3	Obox4
55	ENSMUSG00000079610	Ankrd39	Obox4
56	ENSMUSG00000037351	Actr1b	Obox4
57	ENSMUSG00000026117	Zap70	Obox4
60	ENSMUSG00000026110	Mgat4a	Obox4
61	ENSMUSG00000060771	Tsga10	Obox4
62	ENSMUSG00000037216	Lipt1	Obox4
63	ENSMUSG00000087374	NA	Obox4
64	ENSMUSG00000058407	Txndc9	Obox4
66	ENSMUSG00000048814	Lonrf2	Obox4
67	ENSMUSG00000026078	Pdcl3	Obox4
69	ENSMUSG00000048234	Rnf149	Obox4
70	ENSMUSG00000026074	Map4k4	Obox4
71	ENSMUSG00000045515	Pou3f3	Obox4
72	ENSMUSG00000041763	Tpp2	Obox4
74	ENSMUSG00000025995	Wdr75	Obox4
75	ENSMUSG00000101337	Dnah7c	Obox4
76	ENSMUSG00000025986	Slc39a10	Obox4
77	ENSMUSG00000101996	Gm19206	Obox4
78	ENSMUSG00000026109	Tmeff2	Obox4
79	ENSMUSG00000026107	Nabp1	Obox4
81	ENSMUSG00000026104	Stat1	Obox4
82	ENSMUSG00000026103	Gls	Obox4
83	ENSMUSG00000043015	Nemp2	Obox4
84	ENSMUSG00000043629	1700019D03Rik	Obox4
85	ENSMUSG00000026097	Ormdl1	Obox4
86	ENSMUSG00000026095	Asnsd1	Obox4
89	ENSMUSG00000025979	Mob4	Obox4
90	ENSMUSG00000061863	NA	Obox4
91	ENSMUSG00000025977	Boll	Obox4
92	ENSMUSG00000038349	Plcl1	Obox4
95	ENSMUSG00000054770	Kctd18	Obox4
96	ENSMUSG00000026039	Sgo2a	Obox4
97	ENSMUSG00000064294	Aox3	Obox4
98	ENSMUSG00000079554	Aox2	Obox4
99	ENSMUSG00000026034	Clk1	Obox4
100	ENSMUSG00000026037	Orc2	Obox4
101	ENSMUSG00000026032	Ndufb3	Obox4
102	ENSMUSG00000026031	Cflar	Obox4
103	ENSMUSG00000038079	Tmem237	Obox4
104	ENSMUSG00000026024	Als2	Obox4
105	ENSMUSG00000099922	NA	Obox4
106	ENSMUSG00000104502	NA	Obox4
107	ENSMUSG00000041075	Fzd7	Obox4
109	ENSMUSG00000026021	Sumo1	Obox4
111	ENSMUSG00000067336	Bmpr2	Obox4
113	ENSMUSG00000026019	Wdr12	Obox4
114	ENSMUSG00000073664	Nbeal1	Obox4
115	ENSMUSG00000049439	Cyp20a1	Obox4
117	ENSMUSG00000084799	Ino80dos	Obox4
118	ENSMUSG00000101599	NA	Obox4
119	ENSMUSG00000046856	Gpr1	Obox4
120	ENSMUSG00000102536	NA	Obox4
121	ENSMUSG00000025964	Adam23	Obox4
123	ENSMUSG00000086836	NA	Obox4
124	ENSMUSG00000025959	Klf7	Obox4
125	ENSMUSG00000070871	Ccnyl1	Obox4
126	ENSMUSG00000102140	NA	Obox4
127	ENSMUSG00000045005	Fzd5	Obox4
128	ENSMUSG00000070870	Cryge	Obox4
129	ENSMUSG00000067299	Crygd	Obox4
130	ENSMUSG00000025950	Idh1	Obox4
131	ENSMUSG00000025949	Pikfyve	Obox4
133	ENSMUSG00000026004	Kansl1l	Obox4
134	ENSMUSG00000026000	Lancl1	Obox4
135	ENSMUSG00000026196	Bard1	Obox4
136	ENSMUSG00000026192	Atic	Obox4
137	ENSMUSG00000073652	Apol7d	Obox4
138	ENSMUSG00000026193	Fn1	Obox4
139	ENSMUSG00000102123	NA	Obox4
142	ENSMUSG00000094050	NA	Obox4
144	ENSMUSG00000093843	NA	Obox4
146	ENSMUSG00000039354	Smarcal1	Obox4
147	ENSMUSG00000046330	Rpl37a	Obox4
149	ENSMUSG00000055322	Tns1	Obox4
150	ENSMUSG00000087820	Mir1928	Obox4
151	ENSMUSG00000006299	Aamp	Obox4
152	ENSMUSG00000103403	NA	Obox4
153	ENSMUSG00000103227	NA	Obox4
154	ENSMUSG00000033364	Usp37	Obox4
155	ENSMUSG00000026174	Cnot9	Obox4
156	ENSMUSG00000026173	Plcd4	Obox4
157	ENSMUSG00000026135	Zfp142	Obox4
158	ENSMUSG00000033227	Wnt6	Obox4
159	ENSMUSG00000089964	Gm16582	Obox4
160	ENSMUSG00000090071	Cdk5r2	Obox4
161	ENSMUSG00000103145	NA	Obox4
162	ENSMUSG00000026162	Nhej1	Obox4
163	ENSMUSG00000033159	Cnppd1	Obox4
164	ENSMUSG00000026197	Zfand2b	Obox4
165	ENSMUSG00000026199	Ankzf1	Obox4
166	ENSMUSG00000026200	Glb1l	Obox4
167	ENSMUSG00000118482	NA	Obox4
168	ENSMUSG00000026209	Dnpep	Obox4
169	ENSMUSG00000026207	Speg	Obox4
170	ENSMUSG00000033007	Asic4	Obox4
171	ENSMUSG00000032997	Chpf	Obox4
172	ENSMUSG00000026213	Stk11ip	Obox4
173	ENSMUSG00000026235	Epha4	Obox4
174	ENSMUSG00000004872	Pax3	Obox4
175	ENSMUSG00000026245	Farsb	Obox4
177	ENSMUSG00000099552	NA	Obox4
178	ENSMUSG00000004364	Cul3	Obox4
181	ENSMUSG00000100170	NA	Obox4
182	ENSMUSG00000038496	Slc19a3	Obox4
183	ENSMUSG00000045658	Pid1	Obox4
187	ENSMUSG00000026220	Slc16a14	Obox4
192	ENSMUSG00000026229	Psmd1	Obox4
195	ENSMUSG00000101328	NA	Obox4
197	ENSMUSG00000026239	Pde6d	Obox4
198	ENSMUSG00000036480	Prss56	Obox4
199	ENSMUSG00000048000	Gigyf2	Obox4
201	ENSMUSG00000026288	Inpp5d	Obox4
202	ENSMUSG00000026289	Atg16l1	Obox4
203	ENSMUSG00000070738	Dgkd	Obox4
205	ENSMUSG00000036251	Trpm8	Obox4
206	ENSMUSG00000100908	NA	Obox4
208	ENSMUSG00000055013	Agap1	Obox4
209	ENSMUSG00000044337	Ackr3	Obox4
211	ENSMUSG00000034432	Cops8	Obox4
212	ENSMUSG00000034343	Ube2f	Obox4
213	ENSMUSG00000026307	Scly	Obox4
214	ENSMUSG00000067071	Hes6	Obox4
215	ENSMUSG00000055866	Per2	Obox4
216	ENSMUSG00000026311	Asb1	Obox4
217	ENSMUSG00000026313	Hdac4	Obox4
218	ENSMUSG00000101522	NA	Obox4
220	ENSMUSG00000034220	Gpc1	Obox4
222	ENSMUSG00000047067	Dusp28	Obox4
223	ENSMUSG00000026270	Capn10	Obox4
224	ENSMUSG00000098997	Mir6901	Obox4
225	ENSMUSG00000026274	Pask	Obox4
226	ENSMUSG00000034088	Hdlbp	Obox4
227	ENSMUSG00000034066	Farp2	Obox4
228	ENSMUSG00000026283	Ing5	Obox4
229	ENSMUSG00000040710	St8sia4	Obox4
233	ENSMUSG00000038866	Zcchc2	Obox4
234	ENSMUSG00000102501	NA	Obox4
235	ENSMUSG00000009907	Vps4b	Obox4
236	ENSMUSG00000026312	Cdh7	Obox4
238	ENSMUSG00000026374	Tsn	Obox4
239	ENSMUSG00000064302	Clasp1	Obox4
240	ENSMUSG00000026380	Tfcp2l1	Obox4
241	ENSMUSG00000048402	Gli2	Obox4
242	ENSMUSG00000004451	Ralb	Obox4
245	ENSMUSG00000036975	Tmem177	Obox4
246	ENSMUSG00000036962	Cfap221	Obox4
247	ENSMUSG00000026385	Dbi	Obox4
248	ENSMUSG00000026389	Steap3	Obox4
249	ENSMUSG00000101386	NA	Obox4
251	ENSMUSG00000003721	Insig2	Obox4
253	ENSMUSG00000104039	NA	Obox4
254	ENSMUSG00000026348	Acmsd	Obox4
255	ENSMUSG00000102014	2900009J06Rik	Obox4
256	ENSMUSG00000103999	NA	Obox4
257	ENSMUSG00000036086	Zranb3	Obox4
258	ENSMUSG00000026353	Ubxn4	Obox4
259	ENSMUSG00000026355	Mcm6	Obox4
260	ENSMUSG00000026356	Dars	Obox4
261	ENSMUSG00000045382	Cxcr4	Obox4
262	ENSMUSG00000026399	Cd55	Obox4
263	ENSMUSG00000026405	C4bp	Obox4
264	ENSMUSG00000026409	Pfkfb2	Obox4
266	ENSMUSG00000016526	Dyrk3	Obox4
268	ENSMUSG00000026430	Rassf5	Obox4
269	ENSMUSG00000026425	Srgap2	Obox4
270	ENSMUSG00000042268	Slc26a9	Obox4
272	ENSMUSG00000013275	Slc41a1	Obox4
273	ENSMUSG00000100026	NA	Obox4
274	ENSMUSG00000026434	Nucks1	Obox4
276	ENSMUSG00000079330	Lemd1	Obox4
278	ENSMUSG00000009772	Nuak2	Obox4
280	ENSMUSG00000088911	Gm22609	Obox4
281	ENSMUSG00000026443	Lrrn2	Obox4
285	ENSMUSG00000070644	Etnk2	Obox4
288	ENSMUSG00000102380	NA	Obox4
289	ENSMUSG00000064246	Chil1	Obox4
291	ENSMUSG00000050526	Mgat4f	Obox4
292	ENSMUSG00000026456	Cyb5r1	Obox4
293	ENSMUSG00000026457	Adipor1	Obox4
294	ENSMUSG00000026455	Klhl12	Obox4
295	ENSMUSG00000042229	Rabif	Obox4
296	ENSMUSG00000077202	Gm25612	Obox4
297	ENSMUSG00000096712	NA	Obox4
299	ENSMUSG00000026452	Syt2	Obox4
301	ENSMUSG00000042793	Lgr6	Obox4
302	ENSMUSG00000097680	NA	Obox4
303	ENSMUSG00000003051	Elf3	Obox4
304	ENSMUSG00000062580	Timm17a	Obox4
305	ENSMUSG00000009418	Nav1	Obox4
307	ENSMUSG00000026418	Tnni1	Obox4
308	ENSMUSG00000026411	Tmem9	Obox4
309	ENSMUSG00000041642	Kif21b	Obox4
310	ENSMUSG00000041605	Inava	Obox4
311	ENSMUSG00000026404	Ddx59	Obox4
313	ENSMUSG00000041483	Zfp281	Obox4
314	ENSMUSG00000097113	Gm19705	Obox4
315	ENSMUSG00000097448	NA	Obox4
317	ENSMUSG00000096432	NA	Obox4
319	ENSMUSG00000098243	NA	Obox4
320	ENSMUSG00000026393	Nek7	Obox4
322	ENSMUSG00000033952	Aspm	Obox4
323	ENSMUSG00000026361	Cdc73	Obox4
324	ENSMUSG00000026360	Rgs2	Obox4
325	ENSMUSG00000006005	Tpr	Obox4
326	ENSMUSG00000066842	Hmcn1	Obox4
327	ENSMUSG00000023150	Ivns1abp	Obox4
329	ENSMUSG00000053286	Trmt1l	Obox4
331	ENSMUSG00000026483	Niban1	Obox4
332	ENSMUSG00000043019	Edem3	Obox4
333	ENSMUSG00000042772	Smg7	Obox4
334	ENSMUSG00000042751	Nmnat2	Obox4
335	ENSMUSG00000026478	Lamc1	Obox4
337	ENSMUSG00000042699	Dhx9	Obox4
338	ENSMUSG00000026473	Glul	Obox4
340	ENSMUSG00000056708	Ier5	Obox4
341	ENSMUSG00000026469	Xpr1	Obox4
343	ENSMUSG00000050565	Tor1aip2	Obox4
346	ENSMUSG00000033557	Fam20b	Obox4
347	ENSMUSG00000026594	Ralgps2	Obox4
348	ENSMUSG00000049881	2810025M15Rik	Obox4
350	ENSMUSG00000004031	Brinp2	Obox4
355	ENSMUSG00000043467	Zbtb37	Obox4
356	ENSMUSG00000080463	Gm22489	Obox4
357	ENSMUSG00000102864	NA	Obox4
358	ENSMUSG00000026708	Cenpl	Obox4
359	ENSMUSG00000044835	Ankrd45	Obox4
360	ENSMUSG00000049160	Tex50	Obox4
363	ENSMUSG00000026694	Eef1aknmt	Obox4
365	ENSMUSG00000040124	Gorab	Obox4
366	ENSMUSG00000089700	Gm2343	Obox4
367	ENSMUSG00000026585	Kifap3	Obox4
368	ENSMUSG00000041406	BC055324	Obox4
369	ENSMUSG00000040918	Slc19a2	Obox4
371	ENSMUSG00000104011	NA	Obox4
372	ENSMUSG00000103226	NA	Obox4
373	ENSMUSG00000097281	Gm26685	Obox4
374	ENSMUSG00000040836	Gpr161	Obox4
375	ENSMUSG00000026568	Mpc2	Obox4
377	ENSMUSG00000104517	Gm18407	Obox4
378	ENSMUSG00000040713	Creg1	Obox4
379	ENSMUSG00000102363	NA	Obox4
380	ENSMUSG00000026565	Pou2f1	Obox4
381	ENSMUSG00000026564	Dusp27	Obox4
382	ENSMUSG00000000544	Gpa33	Obox4
383	ENSMUSG00000040629	Mael	Obox4
384	ENSMUSG00000026558	Uck2	Obox4
385	ENSMUSG00000052428	Tmco1	Obox4
386	ENSMUSG00000026687	Aldh9a1	Obox4
387	ENSMUSG00000026688	Mgst3	Obox4
388	ENSMUSG00000052534	Pbx1	Obox4
389	ENSMUSG00000026675	Hsd17b7	Obox4
391	ENSMUSG00000026670	Uap1	Obox4
392	ENSMUSG00000053925	NA	Obox4
393	ENSMUSG00000104386	NA	Obox4
394	ENSMUSG00000099119	NA	Obox4
395	ENSMUSG00000098356	NA	Obox4
396	ENSMUSG00000098965	NA	Obox4
398	ENSMUSG00000038370	Pcp4l1	Obox4
399	ENSMUSG00000005674	Tomm40l	Obox4
400	ENSMUSG00000052423	B4galt3	Obox4
401	ENSMUSG00000062729	Ppox	Obox4
402	ENSMUSG00000053483	Usp21	Obox4
403	ENSMUSG00000079137	NA	Obox4
405	ENSMUSG00000013973	Dedd	Obox4
406	ENSMUSG00000006412	Pfdn2	Obox4
407	ENSMUSG00000045259	Klhdc9	Obox4
408	ENSMUSG00000026641	Usf1	Obox4
409	ENSMUSG00000038235	F11r	Obox4
410	ENSMUSG00000060244	Alyref2	Obox4
411	ENSMUSG00000026556	Vangl2	Obox4
412	ENSMUSG00000003464	Pex19	Obox4
413	ENSMUSG00000026554	Dcaf8	Obox4
414	ENSMUSG00000044708	Kcnj10	Obox4
415	ENSMUSG00000050229	Pigm	Obox4
416	ENSMUSG00000037995	Igsf9	Obox4
417	ENSMUSG00000026547	Tagln2	Obox4
418	ENSMUSG00000026546	Cfap45	Obox4
419	ENSMUSG00000053318	Slamf8	Obox4
420	ENSMUSG00000026544	Dusp23	Obox4
421	ENSMUSG00000090272	Mndal	Obox4
422	ENSMUSG00000028354	Fmn2	Obox4
423	ENSMUSG00000026526	Fh1	Obox4
424	ENSMUSG00000026525	Opn3	Obox4
426	ENSMUSG00000026504	Sdccag8	Obox4
427	ENSMUSG00000019699	Akt3	Obox4
428	ENSMUSG00000063659	Zbtb18	Obox4
429	ENSMUSG00000091476	Catspere2	Obox4
430	ENSMUSG00000099303	NA	Obox4
431	ENSMUSG00000026495	Efcab2	Obox4
432	ENSMUSG00000055067	Smyd3	Obox4
433	ENSMUSG00000026491	Ahctf1	Obox4
435	ENSMUSG00000026489	Coq8a	Obox4
437	ENSMUSG00000060743	H3f3a	Obox4
438	ENSMUSG00000038806	Sde2	Obox4
439	ENSMUSG00000026520	Pycr2	Obox4
441	ENSMUSG00000004880	Lbr	Obox4
442	ENSMUSG00000022995	Enah	Obox4
443	ENSMUSG00000026511	Srp9	Obox4
444	ENSMUSG00000038633	Degs1	Obox4
445	ENSMUSG00000026510	Trp53bp2	Obox4
447	ENSMUSG00000038576	Susd4	Obox4
448	ENSMUSG00000056050	Mia3	Obox4
449	ENSMUSG00000072258	Taf1a	Obox4
450	ENSMUSG00000039384	Dusp10	Obox4
451	ENSMUSG00000039377	Hlx	Obox4
452	ENSMUSG00000073481	Mtarc2	Obox4
453	ENSMUSG00000039349	C130074G19Rik	Obox4
454	ENSMUSG00000026618	Iars2	Obox4
455	ENSMUSG00000026614	Slc30a10	Obox4
456	ENSMUSG00000039239	Tgfb2	Obox4
457	ENSMUSG00000097784	NA	Obox4
458	ENSMUSG00000089730	1700007P06Rik	Obox4
459	ENSMUSG00000026611	Spata17	Obox4
460	ENSMUSG00000084550	Gm25269	Obox4
461	ENSMUSG00000026605	Cenpf	Obox4
462	ENSMUSG00000026604	Ptpn14	Obox4
463	ENSMUSG00000010175	Prox1	Obox4
464	ENSMUSG00000037568	Vash2	Obox4
465	ENSMUSG00000066595	Flvcr1	Obox4
466	ENSMUSG00000057072	Spata45	Obox4
467	ENSMUSG00000062510	Nsl1	Obox4
468	ENSMUSG00000026628	Atf3	Obox4
469	ENSMUSG00000026626	Ppp2r5a	Obox4
470	ENSMUSG00000037461	Ints7	Obox4
472	ENSMUSG00000102755	NA	Obox4
473	ENSMUSG00000094131	NA	Obox4
474	ENSMUSG00000016200	Syt14	Obox4
475	ENSMUSG00000016181	Utp25	Obox4
476	ENSMUSG00000016493	Cd46	Obox4
478	ENSMUSG00000075327	Zbtb2	Obox4
479	ENSMUSG00000095123	NA	Obox4
480	ENSMUSG00000061759	Armt1	Obox4
481	ENSMUSG00000019773	Fbxo5	Obox4
483	ENSMUSG00000040034	Nup43	Obox4
484	ENSMUSG00000097597	NA	Obox4
486	ENSMUSG00000047648	Fbxo30	Obox4
487	ENSMUSG00000055493	Epm2a	Obox4
489	ENSMUSG00000019814	Ltv1	Obox4
490	ENSMUSG00000015501	Hivep2	Obox4
491	ENSMUSG00000112490	NA	Obox4
493	ENSMUSG00000112227	C330004P14Rik	Obox4
494	ENSMUSG00000039910	Cited2	Obox4
495	ENSMUSG00000096977	NA	Obox4
496	ENSMUSG00000039835	Nhsl1	Obox4
497	ENSMUSG00000020009	Ifngr1	Obox4
498	ENSMUSG00000020003	Pex7	Obox4
500	ENSMUSG00000019992	Mtfr2	Obox4
501	ENSMUSG00000019990	Pde7b	Obox4
503	ENSMUSG00000097107	NA	Obox4
506	ENSMUSG00000097327	E030030I06Rik	Obox4
507	ENSMUSG00000097108	NA	Obox4
508	ENSMUSG00000097053	NA	Obox4
510	ENSMUSG00000061983	Rps12	Obox4
511	ENSMUSG00000037455	Slc18b1	Obox4
512	ENSMUSG00000037440	Vnn1	Obox4
513	ENSMUSG00000082437	Gm15136	Obox4
514	ENSMUSG00000082960	Gm6884	Obox4
516	ENSMUSG00000087400	NA	Obox4
518	ENSMUSG00000039166	Akap7	Obox4
519	ENSMUSG00000039089	L3mbtl3	Obox4
520	ENSMUSG00000038916	Soga3	Obox4
521	ENSMUSG00000019883	Echdc1	Obox4
522	ENSMUSG00000019791	Hint3	Obox4
523	ENSMUSG00000019789	Hey2	Obox4
524	ENSMUSG00000069670	Nkain2	Obox4
525	ENSMUSG00000039552	Rsph4a	Obox4
526	ENSMUSG00000112801	NA	Obox4
527	ENSMUSG00000019782	Rwdd1	Obox4
528	ENSMUSG00000039497	Dse	Obox4
530	ENSMUSG00000039480	Nt5dc1	Obox4
532	ENSMUSG00000019777	Hdac2	Obox4
533	ENSMUSG00000069662	Marcks	Obox4
534	ENSMUSG00000046463	NA	Obox4
535	ENSMUSG00000019846	Lama4	Obox4
537	ENSMUSG00000019842	Traf3ip2	Obox4
538	ENSMUSG00000111358	NA	Obox4
539	ENSMUSG00000019841	Rev3l	Obox4
540	ENSMUSG00000096687	Mfsd4b4	Obox4
541	ENSMUSG00000038528	Mfsd4b5	Obox4
542	ENSMUSG00000019837	Gtf3c6	Obox4
543	ENSMUSG00000111213	NA	Obox4
544	ENSMUSG00000075232	Amd1	Obox4
546	ENSMUSG00000038481	Cdk19	Obox4
547	ENSMUSG00000038491	NA	Obox4
548	ENSMUSG00000019831	Wasf1	Obox4
549	ENSMUSG00000038417	Fig4	Obox4
550	ENSMUSG00000091415	Ak9	Obox4
553	ENSMUSG00000019826	Zbtb24	Obox4
554	ENSMUSG00000019823	Mical1	Obox4
555	ENSMUSG00000019822	Smpd2	Obox4
556	ENSMUSG00000019818	Cd164	Obox4
557	ENSMUSG00000111376	NA	Obox4
559	ENSMUSG00000048756	Foxo3	Obox4
560	ENSMUSG00000038302	Afg1l	Obox4
561	ENSMUSG00000019804	Snx3	Obox4
562	ENSMUSG00000086434	NA	Obox4
563	ENSMUSG00000038240	Pdss2	Obox4
566	ENSMUSG00000111749	NA	Obox4
567	ENSMUSG00000111575	NA	Obox4
568	ENSMUSG00000111377	NA	Obox4
569	ENSMUSG00000019863	Qrsl1	Obox4
570	ENSMUSG00000110898	Gm40638	Obox4
571	ENSMUSG00000019849	Prep	Obox4
574	ENSMUSG00000019913	Sim1	Obox4
575	ENSMUSG00000019891	Dcbld1	Obox4
576	ENSMUSG00000019861	Gopc	Obox4
578	ENSMUSG00000112464	NA	Obox4
579	ENSMUSG00000019857	Asf1a	Obox4
580	ENSMUSG00000058298	Mcm9	Obox4
581	ENSMUSG00000003746	Man1a	Obox4
582	ENSMUSG00000038122	Tbc1d32	Obox4
585	ENSMUSG00000019920	Lims1	Obox4
586	ENSMUSG00000003226	Ranbp2	Obox4
587	ENSMUSG00000038010	Ccdc138	Obox4
588	ENSMUSG00000037990	Sh3rf3	Obox4
589	ENSMUSG00000019917	Septin10	Obox4
590	ENSMUSG00000019916	P4ha1	Obox4
591	ENSMUSG00000009647	Mcu	Obox4
593	ENSMUSG00000020107	Anapc16	Obox4
594	ENSMUSG00000004207	Psap	Obox4
595	ENSMUSG00000020101	Vsir	Obox4
596	ENSMUSG00000020100	Slc29a3	Obox4
597	ENSMUSG00000112592	NA	Obox4
598	ENSMUSG00000020099	Unc5b	Obox4
600	ENSMUSG00000037171	Nodal	Obox4
601	ENSMUSG00000112229	NA	Obox4
602	ENSMUSG00000037151	Lrrc20	Obox4
603	ENSMUSG00000020088	Sar1a	Obox4
604	ENSMUSG00000020087	Tysnd1	Obox4
605	ENSMUSG00000037031	Tspan15	Obox4
606	ENSMUSG00000085347	NA	Obox4
607	ENSMUSG00000037012	Hk1	Obox4
608	ENSMUSG00000020079	Supv3l1	Obox4
609	ENSMUSG00000020078	Vps26a	Obox4
610	ENSMUSG00000036955	Kifbp	Obox4
611	ENSMUSG00000020076	Ddx50	Obox4
612	ENSMUSG00000020074	Ccar1	Obox4
614	ENSMUSG00000071253	Slc25a16	Obox4
615	ENSMUSG00000020070	Rufy2	Obox4
616	ENSMUSG00000020069	Hnrnph3	Obox4
619	ENSMUSG00000060843	Ctnna3	Obox4
621	ENSMUSG00000097921	NA	Obox4
623	ENSMUSG00000019873	Reep3	Obox4
626	ENSMUSG00000086838	NA	Obox4
627	ENSMUSG00000019947	Arid5b	Obox4
628	ENSMUSG00000019945	Cabcoco1	Obox4
630	ENSMUSG00000019942	Cdk1	Obox4
631	ENSMUSG00000112729	NA	Obox4
632	ENSMUSG00000069601	Ank3	Obox4
633	ENSMUSG00000048701	Ccdc6	Obox4
634	ENSMUSG00000112676	Gm20108	Obox4
635	ENSMUSG00000037747	Phyhipl	Obox4
637	ENSMUSG00000093732	Gm20609	Obox4
638	ENSMUSG00000037710	Cisd1	Obox4
639	ENSMUSG00000060733	Ipmk	Obox4
640	ENSMUSG00000019923	Zwint	Obox4
642	ENSMUSG00000009070	Rsph14	Obox4
644	ENSMUSG00000020180	Snrpd3	Obox4
645	ENSMUSG00000020196	Cabin1	Obox4
646	ENSMUSG00000001666	Ddt	Obox4
647	ENSMUSG00000001665	Gstt3	Obox4
648	ENSMUSG00000033318	Gstt2	Obox4
649	ENSMUSG00000033307	Mif	Obox4
651	ENSMUSG00000009092	Derl3	Obox4
652	ENSMUSG00000049422	Chchd10	Obox4
653	ENSMUSG00000049764	Zfp280b	Obox4
654	ENSMUSG00000101695	1700094J05Rik	Obox4
655	ENSMUSG00000001151	Pcnt	Obox4
656	ENSMUSG00000033105	Lss	Obox4
657	ENSMUSG00000001120	Pcbp3	Obox4
658	ENSMUSG00000001435	Col18a1	Obox4
659	ENSMUSG00000009291	Pttg1ip	Obox4
660	ENSMUSG00000020265	Sumo3	Obox4
661	ENSMUSG00000051652	Lrrc3	Obox4
662	ENSMUSG00000020277	Pfkl	Obox4
663	ENSMUSG00000000730	Dnmt3l	Obox4
664	ENSMUSG00000000732	Icosl	Obox4
665	ENSMUSG00000064317	NA	Obox4
666	ENSMUSG00000112652	NA	Obox4
667	ENSMUSG00000098932	Mir6410	Obox4
668	ENSMUSG00000032788	Pdxk	Obox4
669	ENSMUSG00000099247	NA	Obox4
670	ENSMUSG00000032763	Ilvbl	Obox4
671	ENSMUSG00000060301	2610008E11Rik	Obox4
672	ENSMUSG00000042570	Mier2	Obox4
673	ENSMUSG00000020307	Cdc34	Obox4
674	ENSMUSG00000023175	Bsg	Obox4
675	ENSMUSG00000035890	Rnf126	Obox4
676	ENSMUSG00000020325	Fstl3	Obox4
677	ENSMUSG00000006498	Ptbp1	Obox4
678	ENSMUSG00000013833	Med16	Obox4
679	ENSMUSG00000035781	R3hdm4	Obox4
680	ENSMUSG00000013858	Tmem259	Obox4
681	ENSMUSG00000004665	Cnn2	Obox4
682	ENSMUSG00000035722	Abca7	Obox4
683	ENSMUSG00000004667	Polr2e	Obox4
684	ENSMUSG00000075706	Gpx4	Obox4
685	ENSMUSG00000003068	Stk11	Obox4
687	ENSMUSG00000045193	Cirbp	Obox4
688	ENSMUSG00000035595	Fam174c	Obox4
689	ENSMUSG00000020156	Pwwp3a	Obox4
690	ENSMUSG00000020150	Gamt	Obox4
691	ENSMUSG00000069565	Dazap1	Obox4
692	ENSMUSG00000063457	Rps15	Obox4
694	ENSMUSG00000020131	Pcsk4	Obox4
695	ENSMUSG00000043822	Adamtsl5	Obox4
696	ENSMUSG00000087432	NA	Obox4
697	ENSMUSG00000035478	Mbd3	Obox4
699	ENSMUSG00000089228	NA	Obox4
700	ENSMUSG00000003341	Atp8b3	Obox4
701	ENSMUSG00000047417	Rexo1	Obox4
702	ENSMUSG00000035397	Klf16	Obox4
703	ENSMUSG00000003346	Abhd17a	Obox4
704	ENSMUSG00000003345	Csnk1g2	Obox4
705	ENSMUSG00000020190	Mknk2	Obox4
706	ENSMUSG00000003348	Mob3a	Obox4
707	ENSMUSG00000020198	Ap3d1	Obox4
708	ENSMUSG00000061589	Dot1l	Obox4
709	ENSMUSG00000020211	Sf3a2	Obox4
710	ENSMUSG00000035242	Oaz1	Obox4
711	ENSMUSG00000087993	Mir1982	Obox4
712	ENSMUSG00000020219	Timm13	Obox4
713	ENSMUSG00000015312	Gadd45b	Obox4
714	ENSMUSG00000048240	Gng7	Obox4
715	ENSMUSG00000046822	Slc39a3	Obox4
716	ENSMUSG00000004929	Thop1	Obox4
718	ENSMUSG00000035027	Map2k2	Obox4
719	ENSMUSG00000035011	Zbtb7a	Obox4
720	ENSMUSG00000004934	Pias4	Obox4
721	ENSMUSG00000034994	Eef2	Obox4
722	ENSMUSG00000034974	Dapk3	Obox4
723	ENSMUSG00000034958	Atcay	Obox4
725	ENSMUSG00000034902	Pip5k1c	Obox4
726	ENSMUSG00000034889	Cactin	Obox4
727	ENSMUSG00000034872	Gipc3	Obox4
728	ENSMUSG00000020232	Hmg20b	Obox4
729	ENSMUSG00000034854	Mfsd12	Obox4
730	ENSMUSG00000020234	4930404N11Rik	Obox4
731	ENSMUSG00000020235	Fzr1	Obox4
732	ENSMUSG00000078440	Dohh	Obox4
733	ENSMUSG00000055053	Nfic	Obox4
734	ENSMUSG00000034792	Gna15	Obox4
735	ENSMUSG00000034781	Gna11	Obox4
736	ENSMUSG00000054452	Tle5	Obox4
737	ENSMUSG00000034771	Tle2	Obox4
738	ENSMUSG00000034758	Tle6	Obox4
739	ENSMUSG00000074862	BC025920	Obox4
740	ENSMUSG00000054708	Ankrd24	Obox4
741	ENSMUSG00000096856	Gm10778	Obox4
742	ENSMUSG00000094622	Gm3055	Obox4
744	ENSMUSG00000112160	BC024063	Obox4
745	ENSMUSG00000078435	AU041133	Obox4
746	ENSMUSG00000112110	NA	Obox4
747	ENSMUSG00000062931	Zfp938	Obox4
748	ENSMUSG00000073427	Gm4924	Obox4
749	ENSMUSG00000063320	1190007I07Rik	Obox4
750	ENSMUSG00000034674	Tdg	Obox4
751	ENSMUSG00000112107	NA	Obox4
752	ENSMUSG00000056821	1700028I16Rik	Obox4
753	ENSMUSG00000020250	Txnrd1	Obox4
754	ENSMUSG00000109864	Eid3	Obox4
755	ENSMUSG00000034591	Slc41a2	Obox4
756	ENSMUSG00000112134	NA	Obox4
757	ENSMUSG00000020255	Nopchap1	Obox4
758	ENSMUSG00000087651	1500009L16Rik	Obox4
759	ENSMUSG00000020033	4930463O16Rik	Obox4
760	ENSMUSG00000097076	Platr7	Obox4
762	ENSMUSG00000034453	Polr3b	Obox4
763	ENSMUSG00000035620	Ric8b	Obox4
764	ENSMUSG00000050035	Fhl4	Obox4
765	ENSMUSG00000049038	Mterf2	Obox4
769	ENSMUSG00000085111	Ascl4	Obox4
770	ENSMUSG00000020044	Timp3	Obox4
771	ENSMUSG00000059602	Syn3	Obox4
772	ENSMUSG00000020048	Hsp90b1	Obox4
773	ENSMUSG00000112743	Nt5dc3	Obox4
774	ENSMUSG00000054027	Nt5dc3	Obox4
777	ENSMUSG00000112536	NA	Obox4
778	ENSMUSG00000020059	Sycp3	Obox4
781	ENSMUSG00000004359	Spic	Obox4
782	ENSMUSG00000111919	NA	Obox4
783	ENSMUSG00000065005	NA	Obox4
784	ENSMUSG00000004356	Utp20	Obox4
786	ENSMUSG00000019948	Actr6	Obox4
787	ENSMUSG00000061904	Slc25a3	Obox4
789	ENSMUSG00000111591	NA	Obox4
790	ENSMUSG00000020014	Cfap54	Obox4
793	ENSMUSG00000020018	Snrpf	Obox4
794	ENSMUSG00000020021	Fgd6	Obox4
795	ENSMUSG00000020022	Ndufa12	Obox4
796	ENSMUSG00000020027	Socs2	Obox4
797	ENSMUSG00000112725	NA	Obox4
798	ENSMUSG00000112261	NA	Obox4
799	ENSMUSG00000092867	Mir3058	Obox4
801	ENSMUSG00000089618	NA	Obox4
803	ENSMUSG00000110353	Gm33543	Obox4
804	ENSMUSG00000112400	NA	Obox4
805	ENSMUSG00000036499	Eea1	Obox4
806	ENSMUSG00000112234	NA	Obox4
807	ENSMUSG00000036478	Btg1	Obox4
808	ENSMUSG00000036446	Lum	Obox4
810	ENSMUSG00000019952	Poc1b	Obox4
812	ENSMUSG00000019960	Dusp6	Obox4
815	ENSMUSG00000019888	Mgat4c	Obox4
816	ENSMUSG00000019897	Ccdc59	Obox4
817	ENSMUSG00000112523	NA	Obox4
818	ENSMUSG00000019907	Ppp1r12a	Obox4
819	ENSMUSG00000065653	Gm23105	Obox4
822	ENSMUSG00000020185	E2f7	Obox4
823	ENSMUSG00000020186	Csrp2	Obox4
824	ENSMUSG00000035798	Zdhhc17	Obox4
825	ENSMUSG00000035759	Bbs10	Obox4
826	ENSMUSG00000112246	NA	Obox4
827	ENSMUSG00000058799	Nap1l1	Obox4
830	ENSMUSG00000112087	NA	Obox4
833	ENSMUSG00000034163	Zfc3h1	Obox4
835	ENSMUSG00000020170	Frs2	Obox4
837	ENSMUSG00000112796	NA	Obox4
839	ENSMUSG00000020184	Mdm2	Obox4
840	ENSMUSG00000060181	Slc35e3	Obox4
842	ENSMUSG00000112525	NA	Obox4
844	ENSMUSG00000020212	Mdm1	Obox4
849	ENSMUSG00000056758	Hmga2	Obox4
850	ENSMUSG00000048661	Lemd3	Obox4
851	ENSMUSG00000025795	Rassf3	Obox4
852	ENSMUSG00000111926	NA	Obox4
853	ENSMUSG00000020115	Tbk1	Obox4
854	ENSMUSG00000092841	NA	Obox4
855	ENSMUSG00000020121	Srgap1	Obox4
856	ENSMUSG00000034620	Rxylt1	Obox4
857	ENSMUSG00000112237	NA	Obox4
858	ENSMUSG00000020124	Usp15	Obox4
860	ENSMUSG00000112482	NA	Obox4
861	ENSMUSG00000078429	Ctdsp2	Obox4
862	ENSMUSG00000040502	Marchf9	Obox4
863	ENSMUSG00000006728	Cdk4	Obox4
864	ENSMUSG00000006736	Tspan31	Obox4
865	ENSMUSG00000040462	Os9	Obox4
866	ENSMUSG00000025417	Pip4k2c	Obox4
867	ENSMUSG00000025410	Dctn2	Obox4
868	ENSMUSG00000025408	Ddit3	Obox4
870	ENSMUSG00000040287	Stac3	Obox4
871	ENSMUSG00000040249	Lrp1	Obox4
872	ENSMUSG00000025402	Nab2	Obox4
873	ENSMUSG00000040195	1700012D01Rik	Obox4
875	ENSMUSG00000040127	Sdr9c7	Obox4
876	ENSMUSG00000088687	Gm23996	Obox4
880	ENSMUSG00000040054	Baz2a	Obox4
881	ENSMUSG00000040043	Rbms2	Obox4
883	ENSMUSG00000044005	Gls2	Obox4
884	ENSMUSG00000039994	Timeless	Obox4
886	ENSMUSG00000005682	Pan2	Obox4
887	ENSMUSG00000005683	Cs	Obox4
888	ENSMUSG00000039914	Coq10a	Obox4
889	ENSMUSG00000014498	Ankrd52	Obox4
890	ENSMUSG00000025374	Nabp2	Obox4
891	ENSMUSG00000025373	Rnf41	Obox4
892	ENSMUSG00000025369	Smarcc2	Obox4
893	ENSMUSG00000090841	Myl6	Obox4
894	ENSMUSG00000025366	Esyt1	Obox4
896	ENSMUSG00000025364	Pa2g4	Obox4
898	ENSMUSG00000018166	Erbb3	Obox4
899	ENSMUSG00000112068	Gm9182	Obox4
900	ENSMUSG00000025362	Rps26	Obox4
901	ENSMUSG00000000711	Rab5b	Obox4
902	ENSMUSG00000025358	Cdk2	Obox4
903	ENSMUSG00000064030	Pym1	Obox4
904	ENSMUSG00000025354	Dnajc14	Obox4
905	ENSMUSG00000025353	Ormdl2	Obox4
906	ENSMUSG00000025352	Gdf11	Obox4
907	ENSMUSG00000025351	Cd63	Obox4
908	ENSMUSG00000090247	Bloc1s1	Obox4
909	ENSMUSG00000049052	Olfr812	Obox4
910	ENSMUSG00000096747	Olfr823	Obox4
911	ENSMUSG00000112742	NA	Obox4
912	ENSMUSG00000082286	NA	Obox4
914	ENSMUSG00000020457	Drg1	Obox4
915	ENSMUSG00000020453	Patz1	Obox4
916	ENSMUSG00000034614	Pik3ip1	Obox4
917	ENSMUSG00000020451	Limk2	Obox4
918	ENSMUSG00000034570	Inpp5j	Obox4
919	ENSMUSG00000084962	NA	Obox4
920	ENSMUSG00000034543	Morc2a	Obox4
921	ENSMUSG00000020435	Osbp2	Obox4
922	ENSMUSG00000048807	Slc35e4	Obox4
923	ENSMUSG00000082816	Gm11953	Obox4
924	ENSMUSG00000020430	Pes1	Obox4
925	ENSMUSG00000004748	Mtfp1	Obox4
926	ENSMUSG00000003581	Rnf215	Obox4
927	ENSMUSG00000034412	Tbc1d10a	Obox4
929	ENSMUSG00000058755	Osm	Obox4
930	ENSMUSG00000085512	NA	Obox4
931	ENSMUSG00000034354	Mtmr3	Obox4
932	ENSMUSG00000079010	NA	Obox4
933	ENSMUSG00000056288	Gm11961	Obox4
934	ENSMUSG00000059534	Uqcr10	Obox4
935	ENSMUSG00000009076	Zmat5	Obox4
936	ENSMUSG00000009073	Nf2	Obox4
937	ENSMUSG00000034285	Nipsnap1	Obox4
939	ENSMUSG00000034201	Gas2l1	Obox4
940	ENSMUSG00000009079	Ewsr1	Obox4
942	ENSMUSG00000085232	Gm11962	Obox4
943	ENSMUSG00000020484	Xbp1	Obox4
945	ENSMUSG00000049680	Urgcp	Obox4
946	ENSMUSG00000020476	Dbnl	Obox4
947	ENSMUSG00000020474	Polm	Obox4
948	ENSMUSG00000020471	Pold2	Obox4
949	ENSMUSG00000020456	Ogdh	Obox4
951	ENSMUSG00000071866	Ppia	Obox4
952	ENSMUSG00000041126	H2az2	Obox4
953	ENSMUSG00000083693	NA	Obox4
954	ENSMUSG00000094483	Purb	Obox4
955	ENSMUSG00000020437	Myo1g	Obox4
957	ENSMUSG00000000378	Ccm2	Obox4
958	ENSMUSG00000041073	Nacad	Obox4
961	ENSMUSG00000040978	Gm11992	Obox4
964	ENSMUSG00000020182	Ddc	Obox4
965	ENSMUSG00000086391	1700042O10Rik	Obox4
966	ENSMUSG00000020176	Grb10	Obox4
968	ENSMUSG00000087060	NA	Obox4
969	ENSMUSG00000033953	Ppp3r1	Obox4
970	ENSMUSG00000020116	Pno1	Obox4
971	ENSMUSG00000016984	Etaa1	Obox4
972	ENSMUSG00000020160	Meis1	Obox4
973	ENSMUSG00000045671	Spred2	Obox4
974	ENSMUSG00000020152	Actr2	Obox4
977	ENSMUSG00000020149	Rab1a	Obox4
978	ENSMUSG00000044066	Cep68	Obox4
979	ENSMUSG00000020142	Slc1a4	Obox4
980	ENSMUSG00000049800	Sertad2	Obox4
981	ENSMUSG00000042363	Lgalsl	Obox4
983	ENSMUSG00000001891	Ugp2	Obox4
984	ENSMUSG00000020319	Wdpcp	Obox4
985	ENSMUSG00000005917	Otx1	Obox4
986	ENSMUSG00000042302	Ehbp1	Obox4
987	ENSMUSG00000086256	NA	Obox4
988	ENSMUSG00000083008	NA	Obox4
990	ENSMUSG00000051650	B3gnt2	Obox4
991	ENSMUSG00000051355	Commd1	Obox4
994	ENSMUSG00000088010	NA	Obox4
995	ENSMUSG00000085665	NA	Obox4
997	ENSMUSG00000056342	Usp34	Obox4
998	ENSMUSG00000042208	0610010F05Rik	Obox4
999	ENSMUSG00000020280	Pus10	Obox4
1000	ENSMUSG00000020275	Rel	Obox4
1002	ENSMUSG00000020467	Efemp1	Obox4
1003	ENSMUSG00000020464	Pnpt1	Obox4
1004	ENSMUSG00000020462	Cfap36	Obox4
1006	ENSMUSG00000032673	Prorsd1	Obox4
1009	ENSMUSG00000085893	Gm12091	Obox4
1010	ENSMUSG00000083917	NA	Obox4
1011	ENSMUSG00000020458	Rtn4	Obox4
1012	ENSMUSG00000044072	Eml6	Obox4
1015	ENSMUSG00000040850	Psme4	Obox4
1016	ENSMUSG00000020309	Chac2	Obox4
1017	ENSMUSG00000020303	Stc2	Obox4
1018	ENSMUSG00000044502	Bod1	Obox4
1019	ENSMUSG00000020300	Cpeb4	Obox4
1020	ENSMUSG00000020297	Nsg2	Obox4
1021	ENSMUSG00000040767	Snrnp25	Obox4
1022	ENSMUSG00000020289	Nprl3	Obox4
1023	ENSMUSG00000044949	Ubtd2	Obox4
1024	ENSMUSG00000020271	Fbxw11	Obox4
1025	ENSMUSG00000057113	Npm1	Obox4
1026	ENSMUSG00000099902	NA	Obox4
1029	ENSMUSG00000069910	Spdl1	Obox4
1030	ENSMUSG00000056427	Slit3	Obox4
1033	ENSMUSG00000042032	Mat2b	Obox4
1035	ENSMUSG00000020326	Ccng1	Obox4
1036	ENSMUSG00000086475	NA	Obox4
1037	ENSMUSG00000086791	NA	Obox4
1038	ENSMUSG00000020415	Pttg1	Obox4
1039	ENSMUSG00000046491	C1qtnf2	Obox4
1040	ENSMUSG00000044950	Pwwp2a	Obox4
1041	ENSMUSG00000019189	Rnf145	Obox4
1042	ENSMUSG00000085476	NA	Obox4
1043	ENSMUSG00000011254	Thg1l	Obox4
1044	ENSMUSG00000040489	Sox30	Obox4
1045	ENSMUSG00000011256	Adam19	Obox4
1046	ENSMUSG00000020397	Med7	Obox4
1048	ENSMUSG00000040365	Trim41	Obox4
1049	ENSMUSG00000078154	Gm12184	Obox4
1050	ENSMUSG00000040350	Trim7	Obox4
1051	ENSMUSG00000086245	NA	Obox4
1052	ENSMUSG00000046311	Zfp62	Obox4
1053	ENSMUSG00000020346	Mgat1	Obox4
1054	ENSMUSG00000063386	Olfr1387	Obox4
1055	ENSMUSG00000020362	Cnot6	Obox4
1056	ENSMUSG00000020366	Mapk9	Obox4
1057	ENSMUSG00000084302	Gm12194	Obox4
1058	ENSMUSG00000015837	Sqstm1	Obox4
1061	ENSMUSG00000082545	NA	Obox4
1062	ENSMUSG00000007850	Hnrnph1	Obox4
1063	ENSMUSG00000088205	NA	Obox4
1064	ENSMUSG00000086226	NA	Obox4
1065	ENSMUSG00000020359	Phykpl	Obox4
1066	ENSMUSG00000020358	Hnrnpab	Obox4
1068	ENSMUSG00000001054	Rmnd5b	Obox4
1069	ENSMUSG00000001053	N4bp3	Obox4
1070	ENSMUSG00000020387	Jade2	Obox4
1071	ENSMUSG00000110618	Gm39822	Obox4
1073	ENSMUSG00000020389	Cdkl3	Obox4
1074	ENSMUSG00000020349	Ppp2ca	Obox4
1077	ENSMUSG00000083129	LOC118567943	Obox4
1079	ENSMUSG00000020361	Hspa4	Obox4
1080	ENSMUSG00000018239	Zcchc10	Obox4
1081	ENSMUSG00000082263	NA	Obox4
1082	ENSMUSG00000049470	Aff4	Obox4
1083	ENSMUSG00000018238	Gdf9	Obox4
1085	ENSMUSG00000018398	Septin8	Obox4
1086	ENSMUSG00000018899	Irf1	Obox4
1087	ENSMUSG00000018900	Slc22a5	Obox4
1088	ENSMUSG00000020334	Slc22a4	Obox4
1090	ENSMUSG00000060068	NA	Obox4
1091	ENSMUSG00000085888	Gm12224	Obox4
1092	ENSMUSG00000035992	Fnip1	Obox4
1093	ENSMUSG00000052298	Cdc42se2	Obox4
1096	ENSMUSG00000018340	Anxa6	Obox4
1097	ENSMUSG00000000594	Gm2a	Obox4
1099	ENSMUSG00000018583	G3bp1	Obox4
1100	ENSMUSG00000020520	Galnt10	Obox4
1101	ENSMUSG00000087165	2010001A14Rik	Obox4
1102	ENSMUSG00000020519	Sap30l	Obox4
1104	ENSMUSG00000037331	Larp1	Obox4
1105	ENSMUSG00000081223	NA	Obox4
1106	ENSMUSG00000020515	Cnot8	Obox4
1107	ENSMUSG00000049755	Zfp672	Obox4
1108	ENSMUSG00000013646	Sh3bp5l	Obox4
1109	ENSMUSG00000072915	Gm12258	Obox4
1110	ENSMUSG00000037001	Zfp39	Obox4
1111	ENSMUSG00000056895	H2bu2	Obox4
1112	ENSMUSG00000036964	Trim17	Obox4
1113	ENSMUSG00000080152	H3f4	Obox4
1114	ENSMUSG00000049287	Iba57	Obox4
1115	ENSMUSG00000020472	Zkscan17	Obox4
1116	ENSMUSG00000005417	Mprip	Obox4
1117	ENSMUSG00000043648	Pld6	Obox4
1118	ENSMUSG00000032633	Flcn	Obox4
1119	ENSMUSG00000088950	NA	Obox4
1120	ENSMUSG00000019373	Cops3	Obox4
1122	ENSMUSG00000098502	NA	Obox4
1123	ENSMUSG00000062115	Rai1	Obox4
1124	ENSMUSG00000098547	Mir6921	Obox4
1125	ENSMUSG00000020538	Srebf1	Obox4
1126	ENSMUSG00000000538	Tom1l2	Obox4
1127	ENSMUSG00000018415	Gid4	Obox4
1128	ENSMUSG00000083412	NA	Obox4
1129	ENSMUSG00000042650	Alkbh5	Obox4
1131	ENSMUSG00000084034	Gm12617	Obox4
1132	ENSMUSG00000020536	Llgl1	Obox4
1133	ENSMUSG00000002812	Flii	Obox4
1134	ENSMUSG00000018599	Mief2	Obox4
1136	ENSMUSG00000042569	Dhrs7b	Obox4
1138	ENSMUSG00000018932	Map2k3	Obox4
1141	ENSMUSG00000109829	NA	Obox4
1142	ENSMUSG00000001034	Mapk7	Obox4
1143	ENSMUSG00000085459	NA	Obox4
1144	ENSMUSG00000020528	Prpsap2	Obox4
1146	ENSMUSG00000018500	Adora2b	Obox4
1148	ENSMUSG00000014245	Pigl	Obox4
1149	ENSMUSG00000086310	NA	Obox4
1150	ENSMUSG00000018509	Cenpv	Obox4
1152	ENSMUSG00000064437	Snord49b	Obox4
1153	ENSMUSG00000085762	NA	Obox4
1154	ENSMUSG00000046417	Lrrc75a	Obox4
1155	ENSMUSG00000005267	Zfp287	Obox4
1156	ENSMUSG00000047342	Zfp286	Obox4
1157	ENSMUSG00000047821	Trim16	Obox4
1158	ENSMUSG00000090173	Fbxw10	Obox4
1159	ENSMUSG00000014177	Tvp23b	Obox4
1160	ENSMUSG00000070407	Hs3st3b1	Obox4
1161	ENSMUSG00000020549	Elac2	Obox4
1162	ENSMUSG00000020542	Myocd	Obox4
1163	ENSMUSG00000018347	Zkscan6	Obox4
1164	ENSMUSG00000050270	Tmem220	Obox4
1165	ENSMUSG00000020910	Adprm	Obox4
1166	ENSMUSG00000055134	NA	Obox4
1167	ENSMUSG00000020902	Ntn1	Obox4
1168	ENSMUSG00000020900	Myh10	Obox4
1170	ENSMUSG00000018740	Slc25a35	Obox4
1171	ENSMUSG00000032892	Rangrf	Obox4
1173	ENSMUSG00000020898	Ctc1	Obox4
1174	ENSMUSG00000020897	Aurkb	Obox4
1175	ENSMUSG00000045176	Borcs6	Obox4
1176	ENSMUSG00000072809	NA	Obox4
1177	ENSMUSG00000020895	Tmem107	Obox4
1178	ENSMUSG00000064899	Snord118	Obox4
1179	ENSMUSG00000088787	NA	Obox4
1180	ENSMUSG00000020893	Per1	Obox4
1181	ENSMUSG00000020892	Aloxe3	Obox4
1182	ENSMUSG00000020890	Gucy2e	Obox4
1183	ENSMUSG00000049299	Trappc1	Obox4
1184	ENSMUSG00000044795	Cyb5d1	Obox4
1185	ENSMUSG00000018476	Kdm6b	Obox4
1186	ENSMUSG00000003934	Efnb3	Obox4
1187	ENSMUSG00000041346	Wrap53	Obox4
1188	ENSMUSG00000059552	Trp53	Obox4
1190	ENSMUSG00000018765	Fxr2	Obox4
1191	ENSMUSG00000041287	Sox15	Obox4
1192	ENSMUSG00000018761	Mpdu1	Obox4
1193	ENSMUSG00000018774	Cd68	Obox4
1194	ENSMUSG00000084708	NA	Obox4
1195	ENSMUSG00000059796	Eif4a1	Obox4
1196	ENSMUSG00000005204	Senp3	Obox4
1197	ENSMUSG00000005198	Polr2a	Obox4
1198	ENSMUSG00000018750	Zbtb4	Obox4
1199	ENSMUSG00000041189	Chrnb1	Obox4
1200	ENSMUSG00000042826	Fgf11	Obox4
1201	ENSMUSG00000089876	Tmem102	Obox4
1202	ENSMUSG00000051790	Nlgn2	Obox4
1203	ENSMUSG00000094845	Tmem95	Obox4
1204	ENSMUSG00000046731	Kctd11	Obox4
1205	ENSMUSG00000018570	2810408A11Rik	Obox4
1206	ENSMUSG00000023170	Gps2	Obox4
1207	ENSMUSG00000078812	Eif5a	Obox4
1208	ENSMUSG00000018554	Ybx2	Obox4
1209	ENSMUSG00000018565	Elp5	Obox4
1210	ENSMUSG00000018572	Phf23	Obox4
1211	ENSMUSG00000020886	Dlg4	Obox4
1213	ENSMUSG00000020831	0610010K14Rik	Obox4
1214	ENSMUSG00000093989	Rnasek	Obox4
1215	ENSMUSG00000000320	Alox12	Obox4
1216	ENSMUSG00000082145	NA	Obox4
1217	ENSMUSG00000018921	Pelp1	Obox4
1218	ENSMUSG00000060216	Arrb2	Obox4
1219	ENSMUSG00000018923	Med11	Obox4
1220	ENSMUSG00000020828	Pld2	Obox4
1222	ENSMUSG00000085952	Gm12315	Obox4
1223	ENSMUSG00000018293	Pfn1	Obox4
1224	ENSMUSG00000060600	Eno3	Obox4
1225	ENSMUSG00000018287	Spag7	Obox4
1226	ENSMUSG00000043602	Zfp3	Obox4
1227	ENSMUSG00000018449	Rpain	Obox4
1228	ENSMUSG00000018446	C1qbp	Obox4
1231	ENSMUSG00000020808	Pimreg	Obox4
1232	ENSMUSG00000020807	4933427D14Rik	Obox4
1233	ENSMUSG00000045667	Smtnl2	Obox4
1234	ENSMUSG00000040447	Spns2	Obox4
1237	ENSMUSG00000020785	Camkk1	Obox4
1238	ENSMUSG00000050107	Haspin	Obox4
1239	ENSMUSG00000040158	Tax1bp3	Obox4
1240	ENSMUSG00000005951	Shpk	Obox4
1241	ENSMUSG00000020741	Cluh	Obox4
1243	ENSMUSG00000010554	Mettl16	Obox4
1244	ENSMUSG00000000282	Mnt	Obox4
1245	ENSMUSG00000043099	Hic1	Obox4
1246	ENSMUSG00000078789	Dph1	Obox4
1247	ENSMUSG00000045287	Rtn4rl1	Obox4
1248	ENSMUSG00000000751	Rpa1	Obox4
1249	ENSMUSG00000045374	Wdr81	Obox4
1250	ENSMUSG00000038217	Tlcd2	Obox4
1251	ENSMUSG00000065529	Mir22	Obox4
1252	ENSMUSG00000020850	Prpf8	Obox4
1253	ENSMUSG00000038178	Slc43a2	Obox4
1254	ENSMUSG00000017781	Pitpna	Obox4
1255	ENSMUSG00000006127	Inpp5k	Obox4
1256	ENSMUSG00000017774	Myo1c	Obox4
1257	ENSMUSG00000017776	Crk	Obox4
1259	ENSMUSG00000069808	Tlcd3a	Obox4
1260	ENSMUSG00000038057	Dbil5	Obox4
1261	ENSMUSG00000017631	Abr	Obox4
1262	ENSMUSG00000044243	Bhlha9	Obox4
1265	ENSMUSG00000037907	Ankrd13b	Obox4
1266	ENSMUSG00000011877	Git1	Obox4
1267	ENSMUSG00000017291	Taok1	Obox4
1268	ENSMUSG00000077442	NA	Obox4
1269	ENSMUSG00000037857	Nufip2	Obox4
1270	ENSMUSG00000017453	Pipox	Obox4
1271	ENSMUSG00000000632	Sez6	Obox4
1272	ENSMUSG00000037791	Phf12	Obox4
1273	ENSMUSG00000020834	Dhrs13	Obox4
1276	ENSMUSG00000017386	Traf4	Obox4
1277	ENSMUSG00000017405	Nek8	Obox4
1278	ENSMUSG00000019437	Tlcd1	Obox4
1279	ENSMUSG00000058546	Rpl23a	Obox4
1280	ENSMUSG00000002059	Rab34	Obox4
1281	ENSMUSG00000044122	Proca1	Obox4
1282	ENSMUSG00000002064	Sdf2	Obox4
1284	ENSMUSG00000010277	2610507B11Rik	Obox4
1285	ENSMUSG00000002055	Spag5	Obox4
1286	ENSMUSG00000041958	Pigs	Obox4
1287	ENSMUSG00000001095	Slc13a2	Obox4
1288	ENSMUSG00000020829	Slc46a1	Obox4
1289	ENSMUSG00000037278	Tmem97	Obox4
1290	ENSMUSG00000017376	Nlk	Obox4
1291	ENSMUSG00000017677	Wsb1	Obox4
1292	ENSMUSG00000020716	Nf1	Obox4
1293	ENSMUSG00000088879	Gm25867	Obox4
1294	ENSMUSG00000077574	Gm24887	Obox4
1295	ENSMUSG00000086474	NA	Obox4
1296	ENSMUSG00000082252	NA	Obox4
1297	ENSMUSG00000017548	Suz12	Obox4
1298	ENSMUSG00000017561	Crlf3	Obox4
1299	ENSMUSG00000017550	Atad5	Obox4
1301	ENSMUSG00000017421	Zfp207	Obox4
1302	ENSMUSG00000017428	Psmd11	Obox4
1303	ENSMUSG00000069796	Gm11426	Obox4
1304	ENSMUSG00000020698	Cct6b	Obox4
1305	ENSMUSG00000020697	Lig3	Obox4
1307	ENSMUSG00000020692	Nle1	Obox4
1308	ENSMUSG00000064856	NA	Obox4
1309	ENSMUSG00000093483	AA465934	Obox4
1310	ENSMUSG00000035085	1700020L24Rik	Obox4
1311	ENSMUSG00000020680	Taf15	Obox4
1312	ENSMUSG00000051832	E230016K23Rik	Obox4
1313	ENSMUSG00000018927	Ccl6	Obox4
1314	ENSMUSG00000018648	Dusp14	Obox4
1315	ENSMUSG00000020532	Acaca	Obox4
1316	ENSMUSG00000018697	Aatf	Obox4
1317	ENSMUSG00000018405	Mrm1	Obox4
1318	ENSMUSG00000020530	Ggnbp2	Obox4
1319	ENSMUSG00000000804	Usp32	Obox4
1320	ENSMUSG00000020525	Ppm1d	Obox4
1321	ENSMUSG00000059439	Bcas3	Obox4
1322	ENSMUSG00000000093	Tbx2	Obox4
1323	ENSMUSG00000034329	Brip1	Obox4
1324	ENSMUSG00000034297	Med13	Obox4
1325	ENSMUSG00000020516	Rps6kb1	Obox4
1326	ENSMUSG00000020513	Tubd1	Obox4
1327	ENSMUSG00000047126	Cltc	Obox4
1328	ENSMUSG00000018427	Ypel2	Obox4
1329	ENSMUSG00000020492	Ska2	Obox4
1330	ENSMUSG00000085310	NA	Obox4
1331	ENSMUSG00000007646	Rad51c	Obox4
1333	ENSMUSG00000010342	Tex14	Obox4
1334	ENSMUSG00000088184	NA	Obox4
1335	ENSMUSG00000098641	NA	Obox4
1336	ENSMUSG00000083894	NA	Obox4
1337	ENSMUSG00000098925	NA	Obox4
1338	ENSMUSG00000020486	Septin4	Obox4
1339	ENSMUSG00000018401	Mtmr4	Obox4
1340	ENSMUSG00000020485	Supt4a	Obox4
1341	ENSMUSG00000084796	NA	Obox4
1342	ENSMUSG00000034156	Tspoap1	Obox4
1343	ENSMUSG00000009356	Lpo	Obox4
1344	ENSMUSG00000020483	Dynll2	Obox4
1345	ENSMUSG00000018379	Srsf1	Obox4
1346	ENSMUSG00000023723	Mrps23	Obox4
1347	ENSMUSG00000085246	NA	Obox4
1348	ENSMUSG00000069769	Msi2	Obox4
1349	ENSMUSG00000018428	Akap1	Obox4
1350	ENSMUSG00000065012	Gm23507	Obox4
1352	ENSMUSG00000000278	Scpep1	Obox4
1354	ENSMUSG00000033983	Coil	Obox4
1355	ENSMUSG00000081766	2210409E12Rik	Obox4
1357	ENSMUSG00000000276	Dgke	Obox4
1358	ENSMUSG00000072553	Gm525	Obox4
1359	ENSMUSG00000088798	Gm22534	Obox4
1360	ENSMUSG00000020553	Pctp	Obox4
1361	ENSMUSG00000003948	Mmd	Obox4
1362	ENSMUSG00000003949	Hlf	Obox4
1363	ENSMUSG00000020544	Cox11	Obox4
1364	ENSMUSG00000054079	Utp18	Obox4
1365	ENSMUSG00000020857	Nme2	Obox4
1366	ENSMUSG00000086003	B230206L02Rik	Obox4
1367	ENSMUSG00000037573	Tob1	Obox4
1368	ENSMUSG00000020866	Cacna1g	Obox4
1369	ENSMUSG00000010080	Epn3	Obox4
1370	ENSMUSG00000076435	Acsf2	Obox4
1373	ENSMUSG00000024414	Mrpl27	Obox4
1375	ENSMUSG00000064512	Gm22456	Obox4
1376	ENSMUSG00000089404	NA	Obox4
1377	ENSMUSG00000038976	Ppp1r9b	Obox4
1378	ENSMUSG00000047181	Samd14	Obox4
1379	ENSMUSG00000038967	Pdk2	Obox4
1380	ENSMUSG00000001507	Itga3	Obox4
1381	ENSMUSG00000001510	Dlx3	Obox4
1382	ENSMUSG00000085992	NA	Obox4
1383	ENSMUSG00000020872	Tac4	Obox4
1384	ENSMUSG00000038909	Kat7	Obox4
1385	ENSMUSG00000038893	Fam117a	Obox4
1386	ENSMUSG00000020873	Slc35b1	Obox4
1387	ENSMUSG00000057522	Spop	Obox4
1388	ENSMUSG00000000120	Ngfr	Obox4
1389	ENSMUSG00000084856	NA	Obox4
1391	ENSMUSG00000075595	Zfp652	Obox4
1392	ENSMUSG00000050860	Phospho1	Obox4
1393	ENSMUSG00000018381	Abi3	Obox4
1394	ENSMUSG00000085578	NA	Obox4
1395	ENSMUSG00000093358	Mir3063	Obox4
1397	ENSMUSG00000099928	NA	Obox4
1398	ENSMUSG00000103376	NA	Obox4
1399	ENSMUSG00000006058	Snf8	Obox4
1400	ENSMUSG00000014349	Ube2z	Obox4
1403	ENSMUSG00000038756	Ttll6	Obox4
1404	ENSMUSG00000049604	Hoxb13	Obox4
1405	ENSMUSG00000099133	NA	Obox4
1406	ENSMUSG00000078706	NA	Obox4
1407	ENSMUSG00000038692	Hoxb4	Obox4
1408	ENSMUSG00000018973	Hoxb1	Obox4
1410	ENSMUSG00000018666	Cbx1	Obox4
1411	ENSMUSG00000081249	NA	Obox4
1413	ENSMUSG00000065515	Mir152	Obox4
1414	ENSMUSG00000018669	Cdk5rap3	Obox4
1415	ENSMUSG00000018659	Pnpo	Obox4
1416	ENSMUSG00000018678	Sp2	Obox4
1417	ENSMUSG00000020877	Scrn2	Obox4
1418	ENSMUSG00000001445	Mrpl10	Obox4
1419	ENSMUSG00000038534	Osbpl7	Obox4
1420	ENSMUSG00000001440	Kpnb1	Obox4
1423	ENSMUSG00000018882	Mrpl45	Obox4
1424	ENSMUSG00000081958	NA	Obox4
1425	ENSMUSG00000049807	Arhgap23	Obox4
1426	ENSMUSG00000038453	Srcin1	Obox4
1427	ENSMUSG00000085860	2410003L11Rik	Obox4
1428	ENSMUSG00000043439	Epop	Obox4
1429	ENSMUSG00000093004	NA	Obox4
1430	ENSMUSG00000038437	Mllt6	Obox4
1431	ENSMUSG00000098881	Mir6927	Obox4
1432	ENSMUSG00000018537	Pcgf2	Obox4
1433	ENSMUSG00000069744	Psmb3	Obox4
1434	ENSMUSG00000018547	Pip4k2b	Obox4
1435	ENSMUSG00000018543	1700001P01Rik	Obox4
1438	ENSMUSG00000050538	NA	Obox4
1439	ENSMUSG00000070336	Fbxo47	Obox4
1440	ENSMUSG00000017417	Plxdc1	Obox4
1441	ENSMUSG00000038352	Arl5c	Obox4
1442	ENSMUSG00000020882	Cacnb1	Obox4
1443	ENSMUSG00000017404	Rpl19	Obox4
1444	ENSMUSG00000017400	Stac2	Obox4
1446	ENSMUSG00000018160	Med1	Obox4
1447	ENSMUSG00000003119	Cdk12	Obox4
1448	ENSMUSG00000061718	Ppp1r1b	Obox4
1449	ENSMUSG00000018167	Stard3	Obox4
1450	ENSMUSG00000038208	Pgap3	Obox4
1452	ENSMUSG00000038150	Ormdl3	Obox4
1453	ENSMUSG00000017221	Psmd3	Obox4
1454	ENSMUSG00000017210	Med24	Obox4
1455	ENSMUSG00000058756	Thra	Obox4
1456	ENSMUSG00000020889	Nr1d1	Obox4
1457	ENSMUSG00000052915	Msl1	Obox4
1458	ENSMUSG00000075576	Gm12359	Obox4
1459	ENSMUSG00000037992	Rara	Obox4
1460	ENSMUSG00000065262	Gm23451	Obox4
1462	ENSMUSG00000037935	Smarce1	Obox4
1463	ENSMUSG00000006777	Krt23	Obox4
1464	ENSMUSG00000062278	Gm11562	Obox4
1465	ENSMUSG00000035530	Eif1	Obox4
1466	ENSMUSG00000006930	Hap1	Obox4
1467	ENSMUSG00000091478	NA	Obox4
1469	ENSMUSG00000020917	Acly	Obox4
1470	ENSMUSG00000006784	Odad4	Obox4
1471	ENSMUSG00000118532	NA	Obox4
1472	ENSMUSG00000014195	Dnajc7	Obox4
1473	ENSMUSG00000017837	Nkiras2	Obox4
1474	ENSMUSG00000019173	Rab5c	Obox4
1475	ENSMUSG00000004040	Stat3	Obox4
1476	ENSMUSG00000001751	Naglu	Obox4
1477	ENSMUSG00000017801	Mlx	Obox4
1478	ENSMUSG00000019303	Psmc3ip	Obox4
1479	ENSMUSG00000017802	Retreg3	Obox4
1480	ENSMUSG00000035112	Wnk4	Obox4
1481	ENSMUSG00000017188	Coa3	Obox4
1482	ENSMUSG00000063316	Rpl27	Obox4
1483	ENSMUSG00000001313	Rnd2	Obox4
1485	ENSMUSG00000034947	Tmem106a	Obox4
1486	ENSMUSG00000085486	Gm11634	Obox4
1487	ENSMUSG00000065820	NA	Obox4
1488	ENSMUSG00000086617	LOC666331	Obox4
1490	ENSMUSG00000064702	NA	Obox4
1491	ENSMUSG00000065251	NA	Obox4
1493	ENSMUSG00000034936	Arl4d	Obox4
1494	ENSMUSG00000034931	Dhx8	Obox4
1495	ENSMUSG00000017724	Etv4	Obox4
1496	ENSMUSG00000001494	Sost	Obox4
1497	ENSMUSG00000003518	Dusp3	Obox4
1498	ENSMUSG00000017314	Mpp2	Obox4
1499	ENSMUSG00000048217	Nags	Obox4
1500	ENSMUSG00000020922	Lsm12	Obox4
1501	ENSMUSG00000034793	G6pc3	Obox4
1502	ENSMUSG00000008855	Hdac5	Obox4
1504	ENSMUSG00000034768	Asb16	Obox4
1505	ENSMUSG00000034757	Tmub2	Obox4
1506	ENSMUSG00000059995	Atxn7l3	Obox4
1507	ENSMUSG00000020923	Ubtf	Obox4
1508	ENSMUSG00000087330	Bloodlinc	Obox4
1509	ENSMUSG00000006575	Rundc3a	Obox4
1510	ENSMUSG00000018677	Slc25a39	Obox4
1511	ENSMUSG00000034708	Grn	Obox4
1512	ENSMUSG00000034685	Fam171a2	Obox4
1513	ENSMUSG00000034664	Itga2b	Obox4
1514	ENSMUSG00000050288	Fzd2	Obox4
1515	ENSMUSG00000051455	Meioc	Obox4
1516	ENSMUSG00000020926	Adam11	Obox4
1517	ENSMUSG00000034520	Gjc1	Obox4
1519	ENSMUSG00000020929	Eftud2	Obox4
1520	ENSMUSG00000051378	Kif18b	Obox4
1521	ENSMUSG00000020935	Dcakd	Obox4
1522	ENSMUSG00000056938	Acbd4	Obox4
1523	ENSMUSG00000048878	Hexim1	Obox4
1524	ENSMUSG00000043372	Hexim2	Obox4
1525	ENSMUSG00000020941	Map3k14	Obox4
1526	ENSMUSG00000034247	Plekhm1	Obox4
1528	ENSMUSG00000000125	Wnt3	Obox4
1530	ENSMUSG00000062421	Arf2	Obox4
1531	ENSMUSG00000018412	Kansl1	Obox4
1532	ENSMUSG00000020687	Cdc27	Obox4
1533	ENSMUSG00000020694	Tlk2	Obox4
1535	ENSMUSG00000049354	Dcaf7	Obox4
1536	ENSMUSG00000020700	Map3k3	Obox4
1537	ENSMUSG00000088702	NA	Obox4
1538	ENSMUSG00000069631	Strada	Obox4
1539	ENSMUSG00000020705	Ddx42	Obox4
1540	ENSMUSG00000078619	Smarcd2	Obox4
1541	ENSMUSG00000020712	Tcam1	Obox4
1542	ENSMUSG00000020715	Ern1	Obox4
1543	ENSMUSG00000065126	Snord104	Obox4
1544	ENSMUSG00000080540	Gm22711	Obox4
1547	ENSMUSG00000088400	NA	Obox4
1548	ENSMUSG00000020719	Ddx5	Obox4
1549	ENSMUSG00000018372	Cep95	Obox4
1550	ENSMUSG00000018363	Smurf2	Obox4
1552	ENSMUSG00000078607	1810010H24Rik	Obox4
1553	ENSMUSG00000040481	Bptf	Obox4
1555	ENSMUSG00000040430	Pitpnc1	Obox4
1556	ENSMUSG00000020720	Psmd12	Obox4
1557	ENSMUSG00000083996	NA	Obox4
1558	ENSMUSG00000020721	Helz	Obox4
1559	ENSMUSG00000082544	NA	Obox4
1560	ENSMUSG00000020728	Cep112	Obox4
1562	ENSMUSG00000020599	Rgs9	Obox4
1563	ENSMUSG00000020611	Gna13	Obox4
1564	ENSMUSG00000020604	Arsg	Obox4
1566	ENSMUSG00000041895	Wipi1	Obox4
1567	ENSMUSG00000020612	Prkar1a	Obox4
1568	ENSMUSG00000018800	Abca5	Obox4
1570	ENSMUSG00000041695	Kcnj2	Obox4
1571	ENSMUSG00000000567	Sox9	Obox4
1572	ENSMUSG00000087259	2610035D17Rik	Obox4
1574	ENSMUSG00000041623	D11Wsu47e	Obox4
1575	ENSMUSG00000018727	Cpsf4l	Obox4
1576	ENSMUSG00000041598	Cdc42ep4	Obox4
1577	ENSMUSG00000083090	Gm11736	Obox4
1578	ENSMUSG00000086135	1700001J04Rik	Obox4
1579	ENSMUSG00000083769	NA	Obox4
1580	ENSMUSG00000057322	Rpl38	Obox4
1581	ENSMUSG00000034714	Ttyh2	Obox4
1582	ENSMUSG00000034706	Dnai2	Obox4
1583	ENSMUSG00000020732	Rab37	Obox4
1584	ENSMUSG00000020733	Slc9a3r1	Obox4
1585	ENSMUSG00000015542	Nat9	Obox4
1586	ENSMUSG00000018861	Fdxr	Obox4
1587	ENSMUSG00000050910	Cdr2l	Obox4
1588	ENSMUSG00000018858	Mrpl58	Obox4
1589	ENSMUSG00000016940	Kctd2	Obox4
1590	ENSMUSG00000045775	Slc16a5	Obox4
1591	ENSMUSG00000057219	Armc7	Obox4
1592	ENSMUSG00000020737	Jpt1	Obox4
1593	ENSMUSG00000020738	Sumo2	Obox4
1594	ENSMUSG00000020739	Nup85	Obox4
1595	ENSMUSG00000020743	Mif4gd	Obox4
1596	ENSMUSG00000020744	Slc25a19	Obox4
1597	ENSMUSG00000059923	Grb2	Obox4
1598	ENSMUSG00000020747	Tmem94	Obox4
1599	ENSMUSG00000034471	Caskin2	Obox4
1600	ENSMUSG00000020782	Llgl2	Obox4
1601	ENSMUSG00000016559	H3f3b	Obox4
1602	ENSMUSG00000020770	Unk	Obox4
1603	ENSMUSG00000034341	Wbp2	Obox4
1604	ENSMUSG00000020777	Acox1	Obox4
1605	ENSMUSG00000020793	Galr2	Obox4
1606	ENSMUSG00000020792	Exoc7	Obox4
1607	ENSMUSG00000034227	Foxj1	Obox4
1608	ENSMUSG00000052949	Rnf157	Obox4
1609	ENSMUSG00000050628	Ubald2	Obox4
1610	ENSMUSG00000015869	Prpsap1	Obox4
1611	ENSMUSG00000020804	Aanat	Obox4
1612	ENSMUSG00000075410	Prcd	Obox4
1613	ENSMUSG00000020812	Snhg16	Obox4
1614	ENSMUSG00000057286	St6galnac2	Obox4
1615	ENSMUSG00000056962	Jmjd6	Obox4
1616	ENSMUSG00000034120	Srsf2	Obox4
1617	ENSMUSG00000020818	Mfsd11	Obox4
1618	ENSMUSG00000093083	NA	Obox4
1620	ENSMUSG00000059248	Septin9	Obox4
1621	ENSMUSG00000086588	Gm11729	Obox4
1622	ENSMUSG00000085336	Gm11732	Obox4
1623	ENSMUSG00000054418	NA	Obox4
1624	ENSMUSG00000025571	Tnrc6c	Obox4
1625	ENSMUSG00000025572	Tmc6	Obox4
1626	ENSMUSG00000025574	Tk1	Obox4
1627	ENSMUSG00000017718	Afmid	Obox4
1628	ENSMUSG00000070330	Tmem235	Obox4
1629	ENSMUSG00000053113	Socs3	Obox4
1630	ENSMUSG00000017715	Pgs1	Obox4
1631	ENSMUSG00000033857	Engase	Obox4
1632	ENSMUSG00000085059	NA	Obox4
1633	ENSMUSG00000025577	Cbx2	Obox4
1634	ENSMUSG00000025578	Cbx8	Obox4
1635	ENSMUSG00000098704	Mir6934	Obox4
1636	ENSMUSG00000088015	Mir1932	Obox4
1638	ENSMUSG00000039850	Endov	Obox4
1639	ENSMUSG00000025372	Baiap2	Obox4
1640	ENSMUSG00000039781	Cep131	Obox4
1641	ENSMUSG00000025377	Tepsin	Obox4
1642	ENSMUSG00000061306	Slc38a10	Obox4
1643	ENSMUSG00000075389	NA	Obox4
1645	ENSMUSG00000039741	Bahcc1	Obox4
1646	ENSMUSG00000043644	0610009L18Rik	Obox4
1647	ENSMUSG00000025793	Hgs	Obox4
1648	ENSMUSG00000039640	Mrpl12	Obox4
1649	ENSMUSG00000025792	Slc25a10	Obox4
1650	ENSMUSG00000025130	P4hb	Obox4
1651	ENSMUSG00000025134	Alyref	Obox4
1652	ENSMUSG00000025137	Pcyt2	Obox4
1653	ENSMUSG00000051510	Mafg	Obox4
1654	ENSMUSG00000025140	Pycr1	Obox4
1655	ENSMUSG00000025141	Myadml2	Obox4
1656	ENSMUSG00000042988	Notum	Obox4
1657	ENSMUSG00000025142	Aspscr1	Obox4
1658	ENSMUSG00000090758	NA	Obox4
1659	ENSMUSG00000025144	Cenpx	Obox4
1660	ENSMUSG00000039450	Dcxr	Obox4
1661	ENSMUSG00000025153	Fasn	Obox4
1662	ENSMUSG00000025161	Slc16a3	Obox4
1663	ENSMUSG00000025169	Ogfod3	Obox4
1664	ENSMUSG00000000056	Narf	Obox4
1665	ENSMUSG00000039275	Foxk2	Obox4
1667	ENSMUSG00000025170	Rab40b	Obox4
1668	ENSMUSG00000039253	Fn3krp	Obox4
1669	ENSMUSG00000046605	B3gntl1	Obox4
1670	ENSMUSG00000099690	NA	Obox4
1671	ENSMUSG00000020671	Rab10	Obox4
1672	ENSMUSG00000118499	NA	Obox4
1673	ENSMUSG00000037486	Asxl2	Obox4
1674	ENSMUSG00000020661	Dnmt3a	Obox4
1675	ENSMUSG00000020658	Efr3b	Obox4
1676	ENSMUSG00000112517	NA	Obox4
1677	ENSMUSG00000020657	Dnajc27	Obox4
1678	ENSMUSG00000020652	Cenpo	Obox4
1679	ENSMUSG00000020647	Ncoa1	Obox4
1680	ENSMUSG00000084597	NA	Obox4
1682	ENSMUSG00000050545	Fam228b	Obox4
1683	ENSMUSG00000020639	Pfn4	Obox4
1684	ENSMUSG00000051721	Wdcp	Obox4
1685	ENSMUSG00000037336	Mfsd2b	Obox4
1686	ENSMUSG00000020634	Ubxn2a	Obox4
1688	ENSMUSG00000020627	Klhl29	Obox4
1689	ENSMUSG00000054364	Rhob	Obox4
1690	ENSMUSG00000020594	Pum2	Obox4
1691	ENSMUSG00000020585	Laptm4a	Obox4
1694	ENSMUSG00000020608	Smc6	Obox4
1695	ENSMUSG00000091430	NA	Obox4
1697	ENSMUSG00000096633	NA	Obox4
1698	ENSMUSG00000020607	Lratd1	Obox4
1699	ENSMUSG00000020601	Trib2	Obox4
1700	ENSMUSG00000020580	Rock2	Obox4
1701	ENSMUSG00000051726	Kcnf1	Obox4
1702	ENSMUSG00000020571	Pdia6	Obox4
1703	ENSMUSG00000071379	Hpcal1	Obox4
1704	ENSMUSG00000113294	NA	Obox4
1705	ENSMUSG00000113234	NA	Obox4
1706	ENSMUSG00000113199	NA	Obox4
1710	ENSMUSG00000113402	NA	Obox4
1711	ENSMUSG00000114188	NA	Obox4
1712	ENSMUSG00000113205	NA	Obox4
1713	ENSMUSG00000113570	NA	Obox4
1715	ENSMUSG00000093908	NA	Obox4
1717	ENSMUSG00000114100	NA	Obox4
1718	ENSMUSG00000113901	NA	Obox4
1719	ENSMUSG00000113964	NA	Obox4
1721	ENSMUSG00000116558	NA	Obox4
1722	ENSMUSG00000112951	NA	Obox4
1724	ENSMUSG00000113157	NA	Obox4
1726	ENSMUSG00000091071	NA	Obox4
1727	ENSMUSG00000069755	3110053B16Rik	Obox4
1728	ENSMUSG00000052632	Asap2	Obox4
1729	ENSMUSG00000070166	Gm25821	Obox4
1730	ENSMUSG00000052593	Adam17	Obox4
1731	ENSMUSG00000076432	Ywhaq	Obox4
1732	ENSMUSG00000093846	Gm4425	Obox4
1733	ENSMUSG00000092597	NA	Obox4
1734	ENSMUSG00000113123	NA	Obox4
1735	ENSMUSG00000113574	NA	Obox4
1736	ENSMUSG00000113798	NA	Obox4
1737	ENSMUSG00000092465	NA	Obox4
1738	ENSMUSG00000113407	NA	Obox4
1739	ENSMUSG00000059669	Taf1b	Obox4
1740	ENSMUSG00000020656	Grhl1	Obox4
1741	ENSMUSG00000020653	Klf11	Obox4
1742	ENSMUSG00000020649	Rrm2	Obox4
1745	ENSMUSG00000020644	Id2	Obox4
1746	ENSMUSG00000063632	Sox11	Obox4
1747	ENSMUSG00000020629	Adi1	Obox4
1748	ENSMUSG00000020628	Trappc12	Obox4
1750	ENSMUSG00000020669	Sh3yl1	Obox4
1751	ENSMUSG00000020659	Cbll1	Obox4
1752	ENSMUSG00000002996	Hbp1	Obox4
1753	ENSMUSG00000090946	Ccdc71l	Obox4
1754	ENSMUSG00000020572	Nampt	Obox4
1755	ENSMUSG00000020570	Sypl	Obox4
1758	ENSMUSG00000020561	Polr1f	Obox4
1759	ENSMUSG00000020590	Snx13	Obox4
1761	ENSMUSG00000020547	Bzw2	Obox4
1762	ENSMUSG00000004151	Etv1	Obox4
1763	ENSMUSG00000047446	Arl4a	Obox4
1764	ENSMUSG00000001627	Ifrd1	Obox4
1765	ENSMUSG00000055917	Zfp277	Obox4
1766	ENSMUSG00000056899	Immp2l	Obox4
1767	ENSMUSG00000014905	Dnajb9	Obox4
1769	ENSMUSG00000021047	Nova1	Obox4
1770	ENSMUSG00000020950	Foxg1	Obox4
1772	ENSMUSG00000020954	Strn3	Obox4
1773	ENSMUSG00000035133	Arhgap5	Obox4
1774	ENSMUSG00000064489	NA	Obox4
1775	ENSMUSG00000112705	NA	Obox4
1776	ENSMUSG00000044408	Sptssa	Obox4
1778	ENSMUSG00000054302	Eapp	Obox4
1779	ENSMUSG00000072255	Rpl31-ps17	Obox4
1780	ENSMUSG00000094826	NA	Obox4
1782	ENSMUSG00000093815	NA	Obox4
1783	ENSMUSG00000095590	NA	Obox4
1784	ENSMUSG00000096206	NA	Obox4
1785	ENSMUSG00000005656	Snx6	Obox4
1786	ENSMUSG00000062929	Cfl2	Obox4
1788	ENSMUSG00000035021	Baz1a	Obox4
1789	ENSMUSG00000062198	2700097O09Rik	Obox4
1790	ENSMUSG00000112022	Gm2436	Obox4
1791	ENSMUSG00000079108	Srp54c	Obox4
1792	ENSMUSG00000021024	Psma6	Obox4
1793	ENSMUSG00000112348	NA	Obox4
1794	ENSMUSG00000045440	Insm2	Obox4
1795	ENSMUSG00000012076	Brms1l	Obox4
1796	ENSMUSG00000047022	Mipol1	Obox4
1797	ENSMUSG00000020986	Sec23a	Obox4
1798	ENSMUSG00000060121	Gemin2	Obox4
1800	ENSMUSG00000020994	Pnn	Obox4
1801	ENSMUSG00000021000	Mia2	Obox4
1804	ENSMUSG00000047227	Gm527	Obox4
1805	ENSMUSG00000035614	Togaram1	Obox4
1806	ENSMUSG00000020949	Fkbp3	Obox4
1808	ENSMUSG00000047534	Mis18bp1	Obox4
1809	ENSMUSG00000113716	NA	Obox4
1810	ENSMUSG00000113158	Gm31447	Obox4
1811	ENSMUSG00000083191	Gm15571	Obox4
1812	ENSMUSG00000034892	Rps29	Obox4
1813	ENSMUSG00000034883	Lrr1	Obox4
1814	ENSMUSG00000043998	Mgat2	Obox4
1815	ENSMUSG00000020974	Pole2	Obox4
1816	ENSMUSG00000020982	Nemf	Obox4
1818	ENSMUSG00000044147	Arf6	Obox4
1819	ENSMUSG00000052673	NA	Obox4
1820	ENSMUSG00000034801	Sos2	Obox4
1821	ENSMUSG00000020988	L2hgdh	Obox4
1823	ENSMUSG00000021071	Trim9	Obox4
1824	ENSMUSG00000113900	NA	Obox4
1825	ENSMUSG00000021076	Actr10	Obox4
1826	ENSMUSG00000060073	Psma3	Obox4
1827	ENSMUSG00000048118	Arid4a	Obox4
1828	ENSMUSG00000034574	Daam1	Obox4
1830	ENSMUSG00000019718	L3hypdh	Obox4
1831	ENSMUSG00000005078	Jkamp	Obox4
1832	ENSMUSG00000034501	Pcnx4	Obox4
1834	ENSMUSG00000021094	Dhrs7	Obox4
1835	ENSMUSG00000112989	NA	Obox4
1836	ENSMUSG00000021096	Ppm1a	Obox4
1837	ENSMUSG00000051367	Six1	Obox4
1838	ENSMUSG00000034460	Six4	Obox4
1842	ENSMUSG00000045690	Wdr89	Obox4
1844	ENSMUSG00000021056	Tex21	Obox4
1846	ENSMUSG00000021057	Akap5	Obox4
1847	ENSMUSG00000033454	Zbtb1	Obox4
1848	ENSMUSG00000059970	Hspa2	Obox4
1850	ENSMUSG00000052609	Plekhg3	Obox4
1851	ENSMUSG00000112388	AI463170	Obox4
1852	ENSMUSG00000021061	Sptb	Obox4
1853	ENSMUSG00000021062	Rab15	Obox4
1854	ENSMUSG00000033373	Fntb	Obox4
1856	ENSMUSG00000021065	Fut8	Obox4
1857	ENSMUSG00000047454	Gphn	Obox4
1859	ENSMUSG00000046157	Tmem229b	Obox4
1861	ENSMUSG00000066440	Zfyve26	Obox4
1862	ENSMUSG00000059060	Rad51b	Obox4
1863	ENSMUSG00000021127	Zfp36l1	Obox4
1864	ENSMUSG00000112545	NA	Obox4
1865	ENSMUSG00000097729	NA	Obox4
1866	ENSMUSG00000112336	NA	Obox4
1867	ENSMUSG00000015143	Actn1	Obox4
1871	ENSMUSG00000089074	Gm23817	Obox4
1872	ENSMUSG00000112047	NA	Obox4
1873	ENSMUSG00000021131	Erh	Obox4
1874	ENSMUSG00000066438	Plekhd1	Obox4
1875	ENSMUSG00000097575	NA	Obox4
1876	ENSMUSG00000021133	Susd6	Obox4
1878	ENSMUSG00000021134	Srsf5	Obox4
1879	ENSMUSG00000021136	Smoc1	Obox4
1880	ENSMUSG00000091803	Cox16	Obox4
1881	ENSMUSG00000021139	Gm20498	Obox4
1882	ENSMUSG00000042724	Map3k9	Obox4
1883	ENSMUSG00000113622	NA	Obox4
1884	ENSMUSG00000113746	NA	Obox4
1885	ENSMUSG00000021221	Dpf3	Obox4
1890	ENSMUSG00000019969	Psen1	Obox4
1891	ENSMUSG00000021224	Numb	Obox4
1892	ENSMUSG00000042523	Dnal1	Obox4
1894	ENSMUSG00000072946	Ptgr2	Obox4
1895	ENSMUSG00000113529	NA	Obox4
1896	ENSMUSG00000021234	Fam161b	Obox4
1897	ENSMUSG00000057265	Bbof1	Obox4
1898	ENSMUSG00000021238	Aldh6a1	Obox4
1899	ENSMUSG00000085793	Lin52	Obox4
1900	ENSMUSG00000021239	Vsx2	Obox4
1901	ENSMUSG00000021240	Abcd4	Obox4
1902	ENSMUSG00000071235	Vrtn	Obox4
1903	ENSMUSG00000021242	Npc2	Obox4
1904	ENSMUSG00000021241	Isca2	Obox4
1905	ENSMUSG00000079645	NA	Obox4
1907	ENSMUSG00000004789	Dlst	Obox4
1908	ENSMUSG00000019235	Rps6kl1	Obox4
1911	ENSMUSG00000021248	Tmed10	Obox4
1912	ENSMUSG00000021250	Fos	Obox4
1913	ENSMUSG00000012609	Ttll5	Obox4
1915	ENSMUSG00000075832	Gm22004	Obox4
1916	ENSMUSG00000021257	Angel1	Obox4
1917	ENSMUSG00000059114	Lrrc74a	Obox4
1918	ENSMUSG00000088403	NA	Obox4
1919	ENSMUSG00000034168	Irf2bpl	Obox4
1920	ENSMUSG00000034157	Cipc	Obox4
1921	ENSMUSG00000021033	Gstz1	Obox4
1924	ENSMUSG00000079036	Alkbh1	Obox4
1925	ENSMUSG00000113372	Gm18624	Obox4
1930	ENSMUSG00000113991	NA	Obox4
1934	ENSMUSG00000113748	NA	Obox4
1938	ENSMUSG00000071207	Gm8587	Obox4
1939	ENSMUSG00000114108	NA	Obox4
1944	ENSMUSG00000113490	Gm18620	Obox4
1945	ENSMUSG00000061533	Cep128	Obox4
1947	ENSMUSG00000020962	Gtf2a1	Obox4
1950	ENSMUSG00000020964	Sel1l	Obox4
1952	ENSMUSG00000021003	Galc	Obox4
1953	ENSMUSG00000021012	Zc3h14	Obox4
1954	ENSMUSG00000033713	Foxn3	Obox4
1955	ENSMUSG00000033731	NA	Obox4
1956	ENSMUSG00000021178	Psmc1	Obox4
1958	ENSMUSG00000072884	Gm10433	Obox4
1959	ENSMUSG00000113362	Gm40557	Obox4
1960	ENSMUSG00000033530	Ttc7b	Obox4
1961	ENSMUSG00000021180	Rps6ka5	Obox4
1962	ENSMUSG00000021182	Ccdc88c	Obox4
1963	ENSMUSG00000097121	D130020L05Rik	Obox4
1964	ENSMUSG00000113817	NA	Obox4
1965	ENSMUSG00000077058	NA	Obox4
1966	ENSMUSG00000021186	Fbln5	Obox4
1967	ENSMUSG00000021188	Trip11	Obox4
1968	ENSMUSG00000021189	Atxn3	Obox4
1969	ENSMUSG00000041781	Cpsf2	Obox4
1970	ENSMUSG00000021190	Lgmn	Obox4
1971	ENSMUSG00000057963	Itpk1	Obox4
1972	ENSMUSG00000096751	NA	Obox4
1973	ENSMUSG00000041712	Ubr7	Obox4
1974	ENSMUSG00000021198	Unc79	Obox4
1975	ENSMUSG00000110677	NA	Obox4
1976	ENSMUSG00000041415	Dicer1	Obox4
1978	ENSMUSG00000021102	Glrx5	Obox4
1979	ENSMUSG00000041359	Tcl1	Obox4
1982	ENSMUSG00000021258	Ccnk	Obox4
1983	ENSMUSG00000084883	Ccdc85c	Obox4
1984	ENSMUSG00000021262	Evl	Obox4
1985	ENSMUSG00000021264	Yy1	Obox4
1986	ENSMUSG00000021265	Slc25a29	Obox4
1987	ENSMUSG00000021266	Wars	Obox4
1988	ENSMUSG00000113217	NA	Obox4
1989	ENSMUSG00000075707	Dio3	Obox4
1990	ENSMUSG00000017843	Ppp2r5c	Obox4
1992	ENSMUSG00000113361	NA	Obox4
1994	ENSMUSG00000056458	Mok	Obox4
1995	ENSMUSG00000097832	NA	Obox4
1997	ENSMUSG00000037904	Ankrd9	Obox4
1998	ENSMUSG00000113056	6030440G07Rik	Obox4
1999	ENSMUSG00000037896	Rcor1	Obox4
2000	ENSMUSG00000021277	Traf3	Obox4
2001	ENSMUSG00000097081	NA	Obox4
2003	ENSMUSG00000007411	Mark3	Obox4
2004	ENSMUSG00000001270	Ckb	Obox4
2005	ENSMUSG00000060950	Trmt61a	Obox4
2006	ENSMUSG00000090193	NA	Obox4
2007	ENSMUSG00000021286	Zfyve21	Obox4
2008	ENSMUSG00000021285	Ppp1r13b	Obox4
2009	ENSMUSG00000021290	Atp5mpl	Obox4
2010	ENSMUSG00000021294	Kif26a	Obox4
2011	ENSMUSG00000054013	Tmem179	Obox4
2012	ENSMUSG00000064326	Siva1	Obox4
2013	ENSMUSG00000047832	Cdca4	Obox4
2014	ENSMUSG00000113830	NA	Obox4
2015	ENSMUSG00000002799	Jag2	Obox4
2016	ENSMUSG00000097476	NA	Obox4
2017	ENSMUSG00000011158	Brf1	Obox4
2018	ENSMUSG00000021143	Pacs2	Obox4
2019	ENSMUSG00000006356	Crip2	Obox4
2020	ENSMUSG00000006360	Crip1	Obox4
2021	ENSMUSG00000037466	Tedc1	Obox4
2022	ENSMUSG00000095079	Igha	Obox4
2024	ENSMUSG00000092683	NA	Obox4
2025	ENSMUSG00000076661	Ighv16-1	Obox4
2029	ENSMUSG00000102301	NA	Obox4
2030	ENSMUSG00000076709	Ighv1-47	Obox4
2031	ENSMUSG00000042063	Zfp386	Obox4
2032	ENSMUSG00000021171	Esyt2	Obox4
2033	ENSMUSG00000099907	Gm10421	Obox4
2036	ENSMUSG00000025323	Sp4	Obox4
2037	ENSMUSG00000113875	D230030E09Rik	Obox4
2040	ENSMUSG00000099269	Calm5	Obox4
2042	ENSMUSG00000021215	Net1	Obox4
2046	ENSMUSG00000000078	Klf6	Obox4
2047	ENSMUSG00000021193	Pitrm1	Obox4
2049	ENSMUSG00000068324	Gm10029	Obox4
2052	ENSMUSG00000058258	Idi1	Obox4
2053	ENSMUSG00000061988	Rpl10a-ps2	Obox4
2054	ENSMUSG00000033499	Larp4b	Obox4
2055	ENSMUSG00000048264	Dip2c	Obox4
2057	ENSMUSG00000021311	Mtr	Obox4
2060	ENSMUSG00000088112	NA	Obox4
2061	ENSMUSG00000113021	NA	Obox4
2062	ENSMUSG00000113308	NA	Obox4
2063	ENSMUSG00000021306	Gpr137b	Obox4
2064	ENSMUSG00000005397	Nid1	Obox4
2067	ENSMUSG00000021302	Ggps1	Obox4
2068	ENSMUSG00000012429	Mplkip	Obox4
2069	ENSMUSG00000041297	Cdk13	Obox4
2071	ENSMUSG00000113528	NA	Obox4
2073	ENSMUSG00000041236	Vps41	Obox4
2074	ENSMUSG00000003062	Stard3nl	Obox4
2075	ENSMUSG00000021322	Aoah	Obox4
2076	ENSMUSG00000021326	Trim27	Obox4
2077	ENSMUSG00000004341	Gpx6	Obox4
2078	ENSMUSG00000021327	Zkscan3	Obox4
2079	ENSMUSG00000088563	Gm23779	Obox4
2080	ENSMUSG00000094338	H2bc13	Obox4
2081	ENSMUSG00000071516	H2ac13	Obox4
2082	ENSMUSG00000080076	H2ac14	Obox4
2083	ENSMUSG00000114279	H2bc14	Obox4
2084	ENSMUSG00000067455	H4c11	Obox4
2085	ENSMUSG00000064288	H4c12	Obox4
2086	ENSMUSG00000063021	H2ac15	Obox4
2087	ENSMUSG00000085331	NA	Obox4
2088	ENSMUSG00000058773	H1f5	Obox4
2090	ENSMUSG00000069306	H4c17	Obox4
2091	ENSMUSG00000069303	H2bc24	Obox4
2092	ENSMUSG00000080770	Gm11278	Obox4
2093	ENSMUSG00000088148	Mir1983	Obox4
2094	ENSMUSG00000081576	NA	Obox4
2095	ENSMUSG00000105839	NA	Obox4
2098	ENSMUSG00000006179	Prss16	Obox4
2101	ENSMUSG00000114817	NA	Obox4
2102	ENSMUSG00000082869	NA	Obox4
2103	ENSMUSG00000082656	Vmn1r-ps125	Obox4
2104	ENSMUSG00000061376	Vmn1r219	Obox4
2105	ENSMUSG00000069280	Vmn1r223	Obox4
2106	ENSMUSG00000085122	4933404K08Rik	Obox4
2107	ENSMUSG00000046351	Zfp322a	Obox4
2108	ENSMUSG00000036376	Abt1	Obox4
2109	ENSMUSG00000085024	C230035I16Rik	Obox4
2110	ENSMUSG00000113440	NA	Obox4
2112	ENSMUSG00000104750	NA	Obox4
2113	ENSMUSG00000060981	H4c8	Obox4
2114	ENSMUSG00000100210	H3c7	Obox4
2115	ENSMUSG00000069274	H4c6	Obox4
2116	ENSMUSG00000052565	H1f3	Obox4
2117	ENSMUSG00000069273	H3c6	Obox4
2118	ENSMUSG00000104771	NA	Obox4
2119	ENSMUSG00000058385	H2bc8	Obox4
2120	ENSMUSG00000061482	H4c4	Obox4
2121	ENSMUSG00000047246	H2bc6	Obox4
2122	ENSMUSG00000084753	Gm22452	Obox4
2123	ENSMUSG00000088030	NA	Obox4
2124	ENSMUSG00000018102	H2bc4	Obox4
2125	ENSMUSG00000036211	H1f6	Obox4
2126	ENSMUSG00000060678	H4c3	Obox4
2128	ENSMUSG00000061615	H2ac4	Obox4
2129	ENSMUSG00000049539	H1f1	Obox4
2130	ENSMUSG00000064140	Trim38	Obox4
2131	ENSMUSG00000050799	H2bc1	Obox4
2132	ENSMUSG00000021337	Scgn	Obox4
2135	ENSMUSG00000006715	Gmnn	Obox4
2136	ENSMUSG00000019132	BC005537	Obox4
2137	ENSMUSG00000006717	Acot13	Obox4
2138	ENSMUSG00000035958	Tdp2	Obox4
2139	ENSMUSG00000016477	E2f3	Obox4
2140	ENSMUSG00000050295	Foxc1	Obox4
2142	ENSMUSG00000021400	Wrnip1	Obox4
2143	ENSMUSG00000021403	Serpinb9b	Obox4
2144	ENSMUSG00000051029	Serpinb1b	Obox4
2147	ENSMUSG00000052180	Serpinb6c	Obox4
2148	ENSMUSG00000046949	Nqo2	Obox4
2149	ENSMUSG00000114067	NA	Obox4
2150	ENSMUSG00000113591	4930447K03Rik	Obox4
2152	ENSMUSG00000071451	Psmg4	Obox4
2154	ENSMUSG00000021413	Prpf4b	Obox4
2155	ENSMUSG00000113066	NA	Obox4
2157	ENSMUSG00000021418	Rpp40	Obox4
2158	ENSMUSG00000021420	Fars2	Obox4
2159	ENSMUSG00000114387	NA	Obox4
2161	ENSMUSG00000099847	NA	Obox4
2162	ENSMUSG00000039087	Rreb1	Obox4
2163	ENSMUSG00000021427	Ssr1	Obox4
2164	ENSMUSG00000021431	Snrnp48	Obox4
2165	ENSMUSG00000114512	NA	Obox4
2166	ENSMUSG00000114491	Gm46393	Obox4
2167	ENSMUSG00000114936	NA	Obox4
2168	ENSMUSG00000021359	Tfap2a	Obox4
2169	ENSMUSG00000114640	NA	Obox4
2172	ENSMUSG00000038683	Pak1ip1	Obox4
2173	ENSMUSG00000021361	Tmem14c	Obox4
2174	ENSMUSG00000021363	Mak	Obox4
2176	ENSMUSG00000091264	Smim13	Obox4
2177	ENSMUSG00000021365	Nedd9	Obox4
2178	ENSMUSG00000087370	Tmem170b	Obox4
2179	ENSMUSG00000085759	NA	Obox4
2180	ENSMUSG00000021366	Hivep1	Obox4
2181	ENSMUSG00000021367	Edn1	Obox4
2182	ENSMUSG00000054021	Sirt5	Obox4
2183	ENSMUSG00000112983	NA	Obox4
2184	ENSMUSG00000044164	Rnf182	Obox4
2185	ENSMUSG00000113780	NA	Obox4
2188	ENSMUSG00000047061	NA	Obox4
2189	ENSMUSG00000038175	Mylip	Obox4
2190	ENSMUSG00000021374	Nup153	Obox4
2191	ENSMUSG00000021375	Kif13a	Obox4
2192	ENSMUSG00000114449	NA	Obox4
2193	ENSMUSG00000051606	NA	Obox4
2194	ENSMUSG00000021377	Dek	Obox4
2195	ENSMUSG00000021379	Id4	Obox4
2197	ENSMUSG00000038042	Ptpdc1	Obox4
2198	ENSMUSG00000038014	Fam120a	Obox4
2199	ENSMUSG00000021384	Susd3	Obox4
2200	ENSMUSG00000037933	Bicd2	Obox4
2201	ENSMUSG00000021385	Ippk	Obox4
2202	ENSMUSG00000021390	Ogn	Obox4
2203	ENSMUSG00000021391	Cenpp	Obox4
2204	ENSMUSG00000037851	Iars	Obox4
2205	ENSMUSG00000113718	NA	Obox4
2207	ENSMUSG00000021395	Spin1	Obox4
2208	ENSMUSG00000021396	Nxnl2	Obox4
2209	ENSMUSG00000091383	NA	Obox4
2210	ENSMUSG00000021448	Shc3	Obox4
2211	ENSMUSG00000062248	Cks2	Obox4
2212	ENSMUSG00000064672	Gm22806	Obox4
2213	ENSMUSG00000035139	Secisbp2	Obox4
2214	ENSMUSG00000021457	Syk	Obox4
2215	ENSMUSG00000021468	Sptlc1	Obox4
2216	ENSMUSG00000107008	Gm2762	Obox4
2217	ENSMUSG00000021469	Msx2	Obox4
2219	ENSMUSG00000025872	Thoc3	Obox4
2220	ENSMUSG00000025871	4833439L19Rik	Obox4
2221	ENSMUSG00000025868	Higd2a	Obox4
2222	ENSMUSG00000047547	Cltb	Obox4
2223	ENSMUSG00000025873	Faf2	Obox4
2224	ENSMUSG00000034928	Rnf44	Obox4
2225	ENSMUSG00000074895	Eif4e1b	Obox4
2226	ENSMUSG00000025875	Tspan17	Obox4
2227	ENSMUSG00000025878	Uimc1	Obox4
2228	ENSMUSG00000021488	Nsd1	Obox4
2229	ENSMUSG00000021485	Mxd3	Obox4
2230	ENSMUSG00000021484	Lman2	Obox4
2231	ENSMUSG00000074886	Grk6	Obox4
2232	ENSMUSG00000058569	Tmed9	Obox4
2233	ENSMUSG00000045767	B230219D22Rik	Obox4
2234	ENSMUSG00000021496	Pcbd2	Obox4
2235	ENSMUSG00000048904	Neurog1	Obox4
2236	ENSMUSG00000007836	Hnrnpa0	Obox4
2239	ENSMUSG00000097399	NA	Obox4
2240	ENSMUSG00000021546	Hnrnpk	Obox4
2241	ENSMUSG00000021553	Slc28a3	Obox4
2242	ENSMUSG00000021557	Agtpbp1	Obox4
2245	ENSMUSG00000035248	Tut7	Obox4
2246	ENSMUSG00000052957	Gas1	Obox4
2247	ENSMUSG00000113471	NA	Obox4
2251	ENSMUSG00000074867	Zfp808	Obox4
2254	ENSMUSG00000094942	Gm3604	Obox4
2255	ENSMUSG00000113865	NA	Obox4
2256	ENSMUSG00000076246	NA	Obox4
2257	ENSMUSG00000055228	NA	Obox4
2259	ENSMUSG00000072066	6720489N17Rik	Obox4
2261	ENSMUSG00000091183	Gm5141	Obox4
2262	ENSMUSG00000021458	Aopep	Obox4
2264	ENSMUSG00000021466	Ptch1	Obox4
2265	ENSMUSG00000102282	NA	Obox4
2266	ENSMUSG00000044934	Zfp367	Obox4
2267	ENSMUSG00000021476	Habp4	Obox4
2268	ENSMUSG00000097101	1810034E14Rik	Obox4
2269	ENSMUSG00000113603	NA	Obox4
2270	ENSMUSG00000033102	Cdc14b	Obox4
2271	ENSMUSG00000021482	Prxl2c	Obox4
2272	ENSMUSG00000118556	NA	Obox4
2273	ENSMUSG00000021477	Ctsl	Obox4
2274	ENSMUSG00000021483	Cdk20	Obox4
2275	ENSMUSG00000114179	NA	Obox4
2276	ENSMUSG00000110393	NA	Obox4
2277	ENSMUSG00000021514	Zfp369	Obox4
2278	ENSMUSG00000114194	Gm3800	Obox4
2279	ENSMUSG00000113406	Gm7762	Obox4
2280	ENSMUSG00000112935	NA	Obox4
2281	ENSMUSG00000113207	Cbx3-ps5	Obox4
2285	ENSMUSG00000113008	NA	Obox4
2286	ENSMUSG00000113565	LOC118568054	Obox4
2287	ENSMUSG00000097562	NA	Obox4
2292	ENSMUSG00000113712	NA	Obox4
2293	ENSMUSG00000074841	LOC118568056	Obox4
2295	ENSMUSG00000113559	NA	Obox4
2301	ENSMUSG00000113156	NA	Obox4
2302	ENSMUSG00000114616	NA	Obox4
2304	ENSMUSG00000114776	Gm18260	Obox4
2305	ENSMUSG00000114629	NA	Obox4
2311	ENSMUSG00000097483	NA	Obox4
2312	ENSMUSG00000114434	NA	Obox4
2313	ENSMUSG00000098452	NA	Obox4
2314	ENSMUSG00000114814	NA	Obox4
2319	ENSMUSG00000114353	Gm7896	Obox4
2320	ENSMUSG00000071294	NA	Obox4
2321	ENSMUSG00000114374	Gm7911	Obox4
2322	ENSMUSG00000021520	Uqcrb	Obox4
2323	ENSMUSG00000021518	Ptdss1	Obox4
2324	ENSMUSG00000090641	Zfp712	Obox4
2326	ENSMUSG00000114568	NA	Obox4
2328	ENSMUSG00000055560	Zfp459	Obox4
2329	ENSMUSG00000069206	Zfp874a	Obox4
2334	ENSMUSG00000113394	NA	Obox4
2337	ENSMUSG00000021598	Med10	Obox4
2338	ENSMUSG00000034525	Ice1	Obox4
2339	ENSMUSG00000021606	Ndufs6	Obox4
2340	ENSMUSG00000021607	Mrpl36	Obox4
2341	ENSMUSG00000113346	Eprn	Obox4
2343	ENSMUSG00000021569	Trip13	Obox4
2344	ENSMUSG00000021572	Cep72	Obox4
2346	ENSMUSG00000021576	Pdcd6	Obox4
2347	ENSMUSG00000021577	Sdha	Obox4
2349	ENSMUSG00000112964	NA	Obox4
2350	ENSMUSG00000069208	Zfp825	Obox4
2351	ENSMUSG00000113019	NA	Obox4
2352	ENSMUSG00000113660	Gm5626	Obox4
2353	ENSMUSG00000113047	NA	Obox4
2355	ENSMUSG00000021585	Cast	Obox4
2356	ENSMUSG00000001542	Ell2	Obox4
2357	ENSMUSG00000113409	Gm8288	Obox4
2358	ENSMUSG00000021591	Glrx	Obox4
2359	ENSMUSG00000021589	Rhobtb3	Obox4
2360	ENSMUSG00000074794	Arrdc3	Obox4
2362	ENSMUSG00000035834	Polr3g	Obox4
2363	ENSMUSG00000021537	Cetn3	Obox4
2365	ENSMUSG00000021549	Rasa1	Obox4
2366	ENSMUSG00000017778	Cox7c	Obox4
2367	ENSMUSG00000012422	Tmem167	Obox4
2369	ENSMUSG00000078958	Atp6ap1l	Obox4
2371	ENSMUSG00000091419	NA	Obox4
2372	ENSMUSG00000021619	Atg10	Obox4
2373	ENSMUSG00000003992	Ssbp2	Obox4
2374	ENSMUSG00000021621	Zcchc9	Obox4
2375	ENSMUSG00000014850	Msh3	Obox4
2376	ENSMUSG00000114968	A630019I02Rik	Obox4
2377	ENSMUSG00000042167	Tent2	Obox4
2378	ENSMUSG00000113791	NA	Obox4
2379	ENSMUSG00000021687	Scamp1	Obox4
2380	ENSMUSG00000021686	Ap3b1	Obox4
2381	ENSMUSG00000113598	NA	Obox4
2382	ENSMUSG00000042015	Wdr41	Obox4
2383	ENSMUSG00000041995	Zbed3	Obox4
2384	ENSMUSG00000021681	Aggf1	Obox4
2385	ENSMUSG00000021678	F2rl1	Obox4
2386	ENSMUSG00000113359	NA	Obox4
2387	ENSMUSG00000113743	Gm8712	Obox4
2388	ENSMUSG00000021671	Poc5	Obox4
2389	ENSMUSG00000021670	Hmgcr	Obox4
2390	ENSMUSG00000091387	Gcnt4	Obox4
2391	ENSMUSG00000041817	Fam169a	Obox4
2397	ENSMUSG00000098238	Gm8756	Obox4
2398	ENSMUSG00000041685	Fcho2	Obox4
2399	ENSMUSG00000114719	Gm18134	Obox4
2400	ENSMUSG00000062461	NA	Obox4
2401	ENSMUSG00000009470	Tnpo1	Obox4
2403	ENSMUSG00000089488	NA	Obox4
2404	ENSMUSG00000021650	Ptcd2	Obox4
2406	ENSMUSG00000097027	NA	Obox4
2408	ENSMUSG00000049658	Bdp1	Obox4
2411	ENSMUSG00000061474	Mrps36	Obox4
2412	ENSMUSG00000041431	Ccnb1	Obox4
2413	ENSMUSG00000041417	Pik3r1	Obox4
2414	ENSMUSG00000034751	Mast4	Obox4
2415	ENSMUSG00000032621	Srek1	Obox4
2416	ENSMUSG00000114637	NA	Obox4
2417	ENSMUSG00000021710	Nln	Obox4
2418	ENSMUSG00000021712	Trim23	Obox4
2419	ENSMUSG00000021713	Ppwd1	Obox4
2420	ENSMUSG00000021715	Cwc27	Obox4
2421	ENSMUSG00000114326	NA	Obox4
2422	ENSMUSG00000114367	NA	Obox4
2424	ENSMUSG00000021692	Dimt1	Obox4
2427	ENSMUSG00000021694	Ercc8	Obox4
2428	ENSMUSG00000021697	Depdc1b	Obox4
2430	ENSMUSG00000021701	Plk2	Obox4
2431	ENSMUSG00000032745	Gpbp1	Obox4
2432	ENSMUSG00000116016	NA	Obox4
2433	ENSMUSG00000032727	Mier3	Obox4
2434	ENSMUSG00000086480	NA	Obox4
2435	ENSMUSG00000085204	NA	Obox4
2436	ENSMUSG00000114656	NA	Obox4
2437	ENSMUSG00000021756	Il6st	Obox4
2438	ENSMUSG00000021758	Ddx4	Obox4
2439	ENSMUSG00000047789	Slc38a9	Obox4
2440	ENSMUSG00000021759	Plpp1	Obox4
2441	ENSMUSG00000042417	Ccno	Obox4
2442	ENSMUSG00000021760	Gpx8	Obox4
2443	ENSMUSG00000042364	Snx18	Obox4
2444	ENSMUSG00000042348	Arl15	Obox4
2445	ENSMUSG00000042284	Itga1	Obox4
2446	ENSMUSG00000042258	Isl1	Obox4
2447	ENSMUSG00000021728	Emb	Obox4
2449	ENSMUSG00000021731	Mrps30	Obox4
2450	ENSMUSG00000093930	Hmgcs1	Obox4
2451	ENSMUSG00000094870	Zfp131	Obox4
2453	ENSMUSG00000096039	D830030K20Rik	Obox4
2454	ENSMUSG00000096574	Gm2956	Obox4
2460	ENSMUSG00000079396	Gm3411	Obox4
2461	ENSMUSG00000090691	Gm3667	Obox4
2463	ENSMUSG00000094242	Gm5456	Obox4
2464	ENSMUSG00000091472	Gm3739	Obox4
2465	ENSMUSG00000079364	Gm3558	Obox4
2466	ENSMUSG00000072723	NA	Obox4
2467	ENSMUSG00000023156	Rpp14	Obox4
2468	ENSMUSG00000021748	Pdhb	Obox4
2469	ENSMUSG00000021752	Kctd6	Obox4
2470	ENSMUSG00000097898	4930455B14Rik	Obox4
2471	ENSMUSG00000021745	NA	Obox4
2473	ENSMUSG00000054423	Cadps	Obox4
2474	ENSMUSG00000051729	Gm5087	Obox4
2475	ENSMUSG00000084902	Gm281	Obox4
2476	ENSMUSG00000068758	Il3ra	Obox4
2477	ENSMUSG00000021733	Slc4a7	Obox4
2479	ENSMUSG00000114390	NA	Obox4
2481	ENSMUSG00000017491	Rarb	Obox4
2482	ENSMUSG00000021775	Nr1d2	Obox4
2485	ENSMUSG00000021807	Rtraf	Obox4
2486	ENSMUSG00000114350	D14Ertd670e	Obox4
2487	ENSMUSG00000043004	Gng2	Obox4
2488	ENSMUSG00000045107	Saysd1	Obox4
2489	ENSMUSG00000023243	Kcnk5	Obox4
2491	ENSMUSG00000039599	Fam149b	Obox4
2492	ENSMUSG00000021811	Dnajc9	Obox4
2493	ENSMUSG00000049960	Mrps16	Obox4
2494	ENSMUSG00000021816	Ppp3cb	Obox4
2496	ENSMUSG00000039376	Synpo2l	Obox4
2497	ENSMUSG00000039367	Sec24c	Obox4
2498	ENSMUSG00000039357	Fut11	Obox4
2499	ENSMUSG00000063787	Chchd1	Obox4
2500	ENSMUSG00000021820	Camk2g	Obox4
2501	ENSMUSG00000021822	Plau	Obox4
2502	ENSMUSG00000021823	Vcl	Obox4
2507	ENSMUSG00000021771	Vdac2	Obox4
2508	ENSMUSG00000021773	Comtd1	Obox4
2509	ENSMUSG00000039081	Zfp503	Obox4
2510	ENSMUSG00000103160	NA	Obox4
2511	ENSMUSG00000021782	Dlg5	Obox4
2512	ENSMUSG00000118605	NA	Obox4
2513	ENSMUSG00000025280	Polr3a	Obox4
2514	ENSMUSG00000025290	Rps24	Obox4
2515	ENSMUSG00000087535	NA	Obox4
2516	ENSMUSG00000007817	Zmiz1	Obox4
2517	ENSMUSG00000021868	Ppif	Obox4
2521	ENSMUSG00000021866	Anxa11	Obox4
[truncated: 9,597 more rows]
