# Supplementary material for: Obox4 promotes zygotic genome activation upon loss of Dux
Source: eLife. 2024 Jun 24;13:e95856. doi: 10.7554/eLife.95856 (PMC11196112; doi:10.7554/eLife.95856)
Supplement: Supplementary file 6. [file elife-95856-supp6.xlsx]

## Sheet: 4.5dpc blastocysts
# Supplementary Table 6
# Developmental stages of embryos produced by DuxKO/Obox4Het x DuxHet/Obox4Het
	Dux+/- Obox4+/?	Dux+/- Obox4-/-	Dux-/- Obox4+/?	Dux-/- Obox4-/-
Degenerated	0	0	0	2
2C	0	1	4	5
4C	1	0	0	0
8C	0	1	0	0
Morula	1	1	2	0
Blastocyst (abnormal)	4	0	0	0
Blastocyst (normal)	54	1	17	0
