# Supplementary material for: Obox4 promotes zygotic genome activation upon loss of Dux
Source: eLife. 2024 Jun 24;13:e95856. doi: 10.7554/eLife.95856 (PMC11196112; doi:10.7554/eLife.95856)
Supplement: Supplementary file 7. [file elife-95856-supp7.xlsx]

## Sheet: Genes
# Supplementary Table 7
# Gene expression in DuxKO/Obox4Het and DuxKO/Obox4KO versus DuxKO/Obox4WT 2C embryos
Geneid	symbol	baseMean_het	log2FoldChange_het	lfcSE_het	pvalue_het	padj_het	baseMean_DKO	log2FoldChange_DKO	lfcSE_DKO	pvalue_DKO	padj_DKO
ENSMUSG00000051951	Xkr4	3.87445	0.00493146	0.188111	0.252029		16.8996	0.0259229	0.413954	0.098577
ENSMUSG00000102343	RP23-333I7.1	16.6046	0.00398505	0.188017	0.528162		4.78517	0.00641904	0.411304	0.868816
ENSMUSG00000025900	Rp1	94.8135	0.0176404	0.188637	0.290844	0.846146	59.5948	0.0271167	0.410414	0.645784	0.920761
ENSMUSG00000025902	Sox17	140.772	0.0218934	0.189937	1.60281e-18	1.34668e-14	54.8783	0.0510659	0.417483	0.00660371	0.0996257
ENSMUSG00000104328	RP23-37D15.1	52.2664	-0.00948663	0.188292	0.217048	0.777765	43.8805	-0.0402423	0.415749	0.0206548	0.188521
ENSMUSG00000102735	RP23-37D15.2	5.90351	-0.0048169	0.188116	0.211618		5.31885	-0.0231465	0.413729	0.233566
ENSMUSG00000098104	Gm6085	18.2025	-0.00483052	0.18812	0.111827		121.948	0.0679536	0.417894	0.250662	0.680682
ENSMUSG00000088000	Gm25493	10.6544	-0.00485486	0.18812	0.153246		9.54133	-0.0233909	0.41378	0.17119
ENSMUSG00000103922	RP23-34E15.4	5.48956	0.000339307	0.187868	0.974744		9.40245	0.0124981	0.411774	0.729537
ENSMUSG00000033845	Mrpl15	112.704	-0.0300935	0.19085	0.112492	0.601315	271.5	0.0902842	0.411167	0.422445	0.821538
ENSMUSG00000025903	Lypla1	1344.69	-0.00117343	0.178288	0.97853	0.999351	1198.56	-0.00984088	0.329218	0.94489	0.989206
ENSMUSG00000033813	Tcea1	8014.45	0.0327923	0.15874	0.710284	0.987738	10091.2	0.763274	0.332479	0.00377611	0.0712258
ENSMUSG00000062588	Gm6104	234.678	0.0184241	0.186694	0.562538	0.957625	134.178	-0.0464201	0.402116	0.651041	0.923138
ENSMUSG00000002459	Rgs20	46.2426	0.00510805	0.187777	0.679738	0.981835	33.2565	0.0111255	0.410031	0.838351	0.969334
ENSMUSG00000033793	Atp6v1h	1368.07	-0.100413	0.211578	0.139407	0.663476	1402.21	-0.11307	0.331825	0.580079	0.895237
ENSMUSG00000104046	RP23-267J18.1	749.615	-0.0221675	0.186954	0.498129	0.942206	516.374	-0.0263415	0.412005	0.535526	0.877071
ENSMUSG00000102907	RP23-335P21.1	26.5658	-0.00626983	0.188183	0.0564832	0.42639	23.9348	-0.0244163	0.413892	0.0941918
ENSMUSG00000033774	Npbwr1	12.0538	0.00512885	0.188124	0.13643
ENSMUSG00000025907	Rb1cc1	22647.9	0.0221241	0.143865	0.830378	0.992863	19973.4	-0.00325965	0.222989	0.983675	0.997461
ENSMUSG00000090031	4732440D04Rik	201.586	0.00263806	0.186337	0.925519	0.995492	111.915	-0.058142	0.413156	0.404202	0.811265
ENSMUSG00000103355	RP23-76C20.3	13.7819	-0.00318424	0.187891	0.699107		11.8533	-0.0135417	0.411806	0.690334
ENSMUSG00000103845	RP23-76C20.4	64.1301	-0.0140753	0.188138	0.393465	0.911301	77.2745	-0.0130079	0.40483	0.851799	0.972494
ENSMUSG00000033740	St18	358.802	0.050393	0.195592	0.115158	0.60752	320.629	0.220414	0.468323	0.135267	0.508421
ENSMUSG00000102135	RP23-5K7.4	3.05255	0.00331825	0.187979	0.611149
ENSMUSG00000102213	RP23-5K7.2	15.2507	-0.00486897	0.188121	0.124407		13.7404	-0.0234258	0.413795	0.139255
ENSMUSG00000051285	Pcmtd1	1896.97	0.0781322	0.197543	0.232143	0.793518	2260.05	0.88432	0.517495	0.00912029	0.118214
ENSMUSG00000103509	WI1-817D1.2	46.7361	-0.00985932	0.188414	0.0108507	0.221013	49.729	-0.0372575	0.413207	0.413459	0.816023
ENSMUSG00000097797	Gm26901	18.406	0.00519059	0.188128	0.105895
ENSMUSG00000103067	RP24-181G14.2	38.9829	-0.0128401	0.188681	0.00584508	0.155167	34.98	-0.0489905	0.417154	0.0155766	0.162273
ENSMUSG00000025909	Sntg1	25.7058	0.000206601	0.187806	0.996843	0.999472	60.389	0.0328318	0.412395	0.503559	0.862269
ENSMUSG00000084353	Gm15452	71.7246	0.00713594	0.187271	0.71686	0.989198	72.1789	0.0401927	0.407203	0.636155	0.917766
ENSMUSG00000104428	RP23-411P10.3	2.58297	0.00483201	0.188104	0.306622
ENSMUSG00000061024	Rrs1	1288.46	-0.015611	0.176964	0.795842	0.991271	846.191	-0.521604	0.645934	0.0500979	0.293037
ENSMUSG00000025911	Adhfe1	42.3478	0.00924002	0.188195	0.333347	0.872975	79.9981	0.0705937	0.420523	0.112905	0.461372
ENSMUSG00000079671	2610203C22Rik	53.6885	0.0116893	0.188293	0.318608	0.865174	71.5982	0.0487505	0.415468	0.275649	0.706057
ENSMUSG00000081441	Gm6161	26.4162	0.00358149	0.187696	0.77976	0.990448	19.3312	0.00502072	0.40998	0.930519
ENSMUSG00000067879	3110035E14Rik	4.1562	0.0049448	0.188112	0.243795		21.0855	0.0251467	0.413887	0.0909828
ENSMUSG00000025912	Mybl1	5965.9	0.0520024	0.167101	0.547699	0.955184	4932.3	-0.0276462	0.262045	0.887313	0.981185
ENSMUSG00000045210	Vcpip1	2844.47	0.0827041	0.188823	0.301428	0.855154	2138.22	-0.0442148	0.302968	0.829375	0.967534
ENSMUSG00000097893	1700034P13Rik	31.7862	-0.0120037	0.18852	0.122258	0.625979	27.1708	-0.0361532	0.415171	0.0416052
ENSMUSG00000025915	Sgk3	644.72	-0.00828809	0.183147	0.839649	0.993473	780.236	0.159844	0.393164	0.38964	0.802583
ENSMUSG00000046101	Mcmdc2	9.00654	-0.00151893	0.187893	0.829484		5.367	-0.0231537	0.413731	0.232395
ENSMUSG00000098234	Snhg6	65.3105	0.003816	0.187716	0.764758	0.989985	20.8322	-0.0235264	0.413813	0.108636
ENSMUSG00000093178	Snord87	396.378	0.0755783	0.207654	0.0442359	0.38756	318.171	0.244456	0.481745	0.122091	0.482752
ENSMUSG00000099032	Tcf24	102.978	0.014728	0.188382	0.330637	0.872566	146.768	0.0846712	0.421992	0.186308	0.594537
ENSMUSG00000025917	Cops5	370.521	0.019382	0.185946	0.594315	0.965693	158.038	-0.156049	0.449461	0.0767202	0.370499
ENSMUSG00000056763	Cspp1	667.938	-0.0117752	0.1844	0.753395	0.989985	704.488	0.0466017	0.369497	0.803899	0.962427
ENSMUSG00000067851	Arfgef1	36427.5	-0.295506	0.240608	0.03064	0.331389	39440.1	0.0595477	0.217927	0.751127	0.948501
ENSMUSG00000088153	Gm26348	11.1924	-0.000984951	0.187877	0.882965		6.20532	-0.0232276	0.413746	0.215733
ENSMUSG00000042501	Cpa6	23.6767	-0.00110823	0.187832	0.885108		33.4726	0.00923512	0.410592	0.852429	0.972741
ENSMUSG00000100212	Gm5522	38.8957	-0.00499393	0.187794	0.654806	0.978449	24.7966	-0.0352687	0.415054	0.0473345
ENSMUSG00000048960	Prex2	353.355	-0.0276173	0.186797	0.472071	0.936575	827.493	0.635532	0.913696	0.0279567	0.217074
ENSMUSG00000057715	A830018L16Rik	205.799	-0.00982226	0.185998	0.734065	0.989985	153.154	-0.0735369	0.409081	0.463385	0.839001
ENSMUSG00000103825	RP23-2K13.1	18.9998	0.00519424	0.188128	0.103838
ENSMUSG00000016918	Sulf1	34.7995	-0.00126607	0.187687	0.900453	0.995173	19.7765	-0.0243367	0.413042	0.432104
ENSMUSG00000025938	Slco5a1	412.618	-0.0413522	0.190755	0.273779	0.833893	414.068	-0.0315272	0.40172	0.740448	0.947268
ENSMUSG00000069620	Gm5250	15.7529	-0.00473317	0.188107	0.20857		14.5838	-0.0212262	0.413316	0.345276
ENSMUSG00000099498	Gm29283	11.2811	0.00511328	0.188123	0.141903
ENSMUSG00000042414	Prdm14	24.5305	-0.00804176	0.188283	0.0359703		22.6559	-0.0341532	0.414597	0.180662
ENSMUSG00000005886	Ncoa2	18310.2	-0.022476	0.148617	0.803881	0.991606	17691.3	0.108815	0.22183	0.564537	0.888849
ENSMUSG00000104170	RP23-125I14.3	5.78762	0.00425152	0.188046	0.445329		13.7852	0.0234325	0.413537	0.279674
ENSMUSG00000103085	RP23-125I14.2	17.6637	0.00531732	0.188116	0.242331		41.1578	0.0456698	0.416397	0.0556878	0.309505
ENSMUSG00000102664	RP23-125I14.1	14.2466	0.00421622	0.188037	0.476978
ENSMUSG00000025935	Tram1	5981.92	0.0244794	0.159663	0.778946	0.990294	5970.01	0.232986	0.282958	0.279779	0.709388
ENSMUSG00000025937	Lactb2	154.314	0.0075347	0.18678	0.75659	0.989985	161.587	0.0565002	0.404793	0.590322	0.900753
ENSMUSG00000102982	RP23-70F22.2	73.2685	-0.014778	0.188594	0.225218	0.786429	163.774	0.0600812	0.405691	0.563191	0.888058
ENSMUSG00000067813	Xkr9	56.4038	-0.0207054	0.189723	0.00270976	0.104678	141.129	0.0427596	0.406212	0.639178	0.917905
ENSMUSG00000025932	Eya1	1751.66	0.046645	0.180919	0.497231	0.942206	2130.81	0.66815	0.48057	0.0256242	0.21007
ENSMUSG00000095853	Gm22616	3.15643	-0.00186661	0.187909	0.791944		2.89166	-0.00844612	0.411527	0.803436
ENSMUSG00000081201	Smt3h2-ps4	18.2986	0.00396769	0.187848	0.699529		4.71572	-0.023074	0.413715	0.24817
ENSMUSG00000082193	Rpl5-ps1	7.18542	-0.000240354	0.187867	0.964778		14.1854	0.0160448	0.41165	0.689102
ENSMUSG00000032769	Trpa1	151.247	0.00864599	0.186463	0.749599	0.989985	167.179	0.0805026	0.40609	0.494993	0.857289
ENSMUSG00000092083	Kcnb2	76.8281	0.000336999	0.187407	0.996676	0.999472	109.239	0.0670795	0.409193	0.491902	0.856174
ENSMUSG00000025925	Terf1	970.037	0.0240195	0.180192	0.677846	0.981835	722.201	-0.0804505	0.364118	0.654161	0.924676
ENSMUSG00000067795	4930444P10Rik	38.5977	0.00986588	0.188262	0.2848	0.841098	43.5666	0.0518453	0.416257	0.225547	0.649862
ENSMUSG00000043716	Rpl7	956.415	-0.0272657	0.18116	0.6307	0.973682	676.563	-0.354552	0.518505	0.103318	0.441575
ENSMUSG00000025921	Rdh10	3217.71	-0.123365	0.214192	0.154906	0.693463	3508.9	0.0385151	0.279738	0.85656	0.97406
ENSMUSG00000025920	Stau2	1566.78	-0.0271591	0.177644	0.670538	0.981835	1660.39	0.113673	0.326047	0.58769	0.899744
ENSMUSG00000025939	Ube2w	1200.71	-0.0218338	0.17994	0.701446	0.986161	1168.11	0.00805171	0.337488	0.972381	0.995391
ENSMUSG00000102457	RP23-382H8.2	168.945	0.00393394	0.186132	0.891472	0.994267	257.457	0.0665745	0.411856	0.446685	0.832196
ENSMUSG00000079658	Tceb1	3031.09	0.180745	0.271441	0.065832	0.461527	1837.77	-0.166166	0.32669	0.435893	0.82799
ENSMUSG00000097744	D030040B21Rik	69.82	-0.0135882	0.188434	0.272648	0.833436	53.3725	-0.0738372	0.422747	0.0023272	0.0543408
ENSMUSG00000100959	Gm7654	13.2625	0.00420162	0.188024	0.504662
ENSMUSG00000025940	Tmem70	306.588	-0.018099	0.186321	0.577787	0.961814	229.22	-0.158103	0.431281	0.234699	0.662729
ENSMUSG00000025779	Ly96	62.6893	-0.0191214	0.189036	0.187988	0.742044	48.2314	-0.0675732	0.421116	0.00375522	0.0711047
ENSMUSG00000091020	Gm5828	3.89461	0.00327013	0.187974	0.625138		11.6686	0.0222405	0.413297	0.365155
ENSMUSG00000101640	Gm28376	106.055	0.00446468	0.186723	0.852623	0.99374	55.1007	-0.0541564	0.412966	0.415146	0.817113
ENSMUSG00000042686	Jph1	158.516	-0.0267238	0.189453	0.256844	0.813878	534.904	0.984069	1.28515	0.0134034	0.148826
ENSMUSG00000025777	Gdap1	18316.8	-0.0515025	0.155844	0.574573	0.961814	21903.9	0.509291	0.25419	0.0159979	0.164289
ENSMUSG00000099899	Gm28784	252.433	-0.0191343	0.186645	0.546058	0.954041	389.403	0.136805	0.408985	0.373851	0.791392
ENSMUSG00000101589	Rbm6-ps1	26.6882	-0.00306632	0.187676	0.79158	0.991121	24.8207	-0.00918313	0.409705	0.847862
ENSMUSG00000067773	Defb41	56.4749	0.00481327	0.187805	0.683196	0.982072	15.1071	-0.0234587	0.4138	0.131725
ENSMUSG00000042596	Tfap2d	27.4649	-0.00583481	0.188088	0.371492	0.896686	22.6051	-0.0235209	0.413814	0.103306
ENSMUSG00000100720	AC098736.2	21.8475	0.0023324	0.187727	0.841137		12.3947	-0.00579932	0.411047	0.871007
ENSMUSG00000025927	Tfap2b	506.2	0.0161577	0.183308	0.723001	0.989515	479.239	0.0821166	0.37884	0.628035	0.915327
ENSMUSG00000043760	Pkhd1	560.73	-0.00797084	0.182561	0.851798	0.993659	749.071	0.188519	0.419195	0.287944	0.71794
ENSMUSG00000041872	Il17f	136.372	0.0106975	0.186779	0.678527	0.981835	110.286	0.0168508	0.402634	0.863566	0.976089
ENSMUSG00000041859	Mcm3	1845.56	0.0542796	0.182295	0.44014	0.926324	1106.6	-0.395735	0.486881	0.103506	0.441947
ENSMUSG00000102121	Gm28065	40.5644	0.00432334	0.187588	0.769107	0.989985	83.6903	0.0993247	0.424284	0.202495	0.61705
ENSMUSG00000025931	Paqr8	23.8529	-0.00801546	0.188281	0.0370895		72.7457	0.0396682	0.409933	0.581047	0.89592
ENSMUSG00000041809	Efhc1	40.5879	-0.000291963	0.187728	0.954638	0.998605	19.5024	-0.0235381	0.413813	0.113097
ENSMUSG00000041779	Tram2	405.559	0.0331759	0.189733	0.297459	0.853584	197.201	-0.0384417	0.398503	0.723844	0.943535
ENSMUSG00000100819	Gm2693	28.8431	0.00713665	0.188223	0.0424496	0.379677	27.7807	0.0298479	0.414356	0.0548775
ENSMUSG00000025933	Tmem14a	14.2305	-0.004912	0.188123	0.128262		154.211	0.181603	0.468853	0.027581	0.21557
ENSMUSG00000102633	RP23-278E1.4	34.722	-0.00860129	0.188153	0.34609	0.880591	58.6227	0.00637067	0.40702	0.937979	0.988446
ENSMUSG00000099343	Gm28836	53.1316	-0.0108657	0.188497	0.00681185	0.169291	47.8696	-0.0430952	0.416182	0.015696	0.162734
ENSMUSG00000096375	Gm7094	4.34502	-0.000558012	0.187873	0.934344		4.35881	-2.61559e-05	0.41114	0.991911
ENSMUSG00000025936	Gm4956	12.9447	-0.00436249	0.188071	0.362982		11.0809	-0.0234157	0.413788	0.157506
ENSMUSG00000067750	Khdc1a	10825.4	-0.00330459	0.153524	0.972435	0.999351	11598.4	0.330149	0.269922	0.117451	0.471611
ENSMUSG00000086194	Gm16329	35.4019	0.00459786	0.187805	0.69095	0.983876	38.0472	0.0364371	0.411232	0.548209	0.883699
ENSMUSG00000094436	Gm16327	45.609	0.0041524	0.187705	0.749336	0.989985	15.6187	-0.0214122	0.413031	0.434385
ENSMUSG00000041722	Khdc1c	12296.5	0.0103896	0.155329	0.907085	0.995192	11710.6	0.129202	0.246561	0.51265	0.866227
ENSMUSG00000085507	Gm2709	48.5624	0.00638563	0.187768	0.633867	0.974738	22.3147	-0.00427262	0.410642	0.906293
ENSMUSG00000085079	Khdc1b	54223.2	0.333058	0.243498	0.0216507	0.292459	61382.6	0.906732	0.319342	0.000677152	0.0245043
ENSMUSG00000028033	Kcnq5	33.0804	-0.0113195	0.188525	0.0316451	0.335889	34.9606	-0.0311479	0.412813	0.453223	0.834307
ENSMUSG00000041670	Rims1	4065.8	0.0520639	0.171331	0.530625	0.951657	3798.41	0.171736	0.30199	0.426632	0.823746
ENSMUSG00000102766	RP23-28L24.5	38.4316	0.00631283	0.187907	0.572523	0.961814	12.4351	-0.00682029	0.411348	0.839614
ENSMUSG00000065405	Mir30a	2.58297	0.00483201	0.188104	0.306622
ENSMUSG00000026158	Ogfrl1	507.186	0.0187439	0.183849	0.6754	0.981835	271.14	-0.213246	0.462755	0.141532	0.5181
ENSMUSG00000026156	B3gat2	88.7132	0.00952473	0.187657	0.583092	0.963008	49.6818	-0.000760012	0.407473	0.978732	0.996168
ENSMUSG00000026155	Smap1	1642.98	-0.0519411	0.181559	0.452206	0.930242	1768.68	0.0895831	0.317673	0.669401	0.92844
ENSMUSG00000026154	1110058L19Rik	120.711	0.00800185	0.187632	0.624092	0.972654	62.8549	-0.0120452	0.405796	0.863823	0.976089
ENSMUSG00000026153	Fam135a	3435.42	-0.00843322	0.169515	0.905381	0.995192	3123.01	-0.0050025	0.281188	0.976817	0.99597
ENSMUSG00000102398	RP23-255J24.2	22.0757	-0.00383655	0.187969	0.58923		16.7552	-0.0221638	0.413511	0.27489
ENSMUSG00000026141	Col19a1	146.13	-0.00777694	0.186841	0.727877	0.989823	157.617	0.0047836	0.396856	0.974196	0.995633
ENSMUSG00000100131	Gm28439	17097.2	-0.0073427	0.155522	0.943145	0.99729	20015.8	0.514939	0.297604	0.0270175	0.213917
ENSMUSG00000067736	Gm10222	10237.4	-0.0407088	0.167167	0.741486	0.989985	11643.6	0.345806	0.315517	0.134329	0.507073
ENSMUSG00000101939	Gm28438	8840.73	-0.157296	0.21377	0.142316	0.668438	10896.8	0.32913	0.291238	0.138557	0.512922
ENSMUSG00000101111	Gm28437	13205.1	0.329437	0.292056	0.0293247	0.327309	12500.9	0.561688	0.287463	0.0147206	0.157349
ENSMUSG00000100862	Gm10925	77013.4	0.140955	0.167754	0.2058	0.765676	74627.9	0.352054	0.249301	0.0853101	0.395363
ENSMUSG00000102070	Gm28661	28819.1	0.226815	0.218157	0.0611065	0.442601	27108.1	0.409642	0.28052	0.0635467	0.332886
ENSMUSG00000101249	Gm29216	13639.4	0.317641	0.300161	0.0288105	0.324791	14219.4	0.768716	0.334888	0.0036791	0.0703654
ENSMUSG00000073725	Lmbrd1	36.0999	-0.0119771	0.188536	0.0998792	0.566189	47.5801	-0.0221568	0.408895	0.715187	0.941704
ENSMUSG00000033569	Bai3	228.161	0.00226477	0.186604	0.9321	0.995758	169.907	-0.0362831	0.397251	0.744821	0.947844
ENSMUSG00000103924	RP23-184I13.4	10.8231	-0.00485579	0.18812	0.151921		9.75122	-0.0233821	0.41378	0.169184
ENSMUSG00000095256	n-R5s209	11.5752	0.00426966	0.188043	0.457796		9.96741	0.0203102	0.41293	0.46716
ENSMUSG00000101372	Gm19028	3.34778	0.000214566	0.18787	0.9846
ENSMUSG00000086240	Gm7846	3.04407	-0.00133098	0.18789	0.853283
ENSMUSG00000081557	Gm5697	5.92092	-0.00383306	0.188026	0.495309		18.1583	0.0121719	0.411705	0.745294
ENSMUSG00000053185	Gm9898	42.6511	-0.00405263	0.18772	0.725395	0.98956	25.5571	-0.035706	0.415111	0.0449157
ENSMUSG00000048874	Phf3	27850.5	-0.171774	0.200038	0.112631	0.601798	28097.4	-0.0175017	0.21275	0.918287	0.984254
ENSMUSG00000104315	RP23-471J16.2	12.1221	0.00369068	0.187994	0.579048
ENSMUSG00000026064	Ptp4a1	79.8966	-0.00999669	0.187908	0.484346	0.940602	112.247	0.00921092	0.399887	0.936518	0.987806
ENSMUSG00000117310		553.206	0.0288533	0.185815	0.51347	0.944823	748.031	0.51803	0.675322	0.0496079	0.292247
ENSMUSG00000117091		34.4287	-0.0095823	0.188391	0.016657	0.260619	30.8334	-0.0375014	0.415354	0.0343099	0.241403
ENSMUSG00000086727	4931428L18Rik	358.468	0.000926412	0.184825	0.985627	0.999472	359.871	0.0383805	0.390979	0.778632	0.956422
ENSMUSG00000100237	Gm28644	31.1715	0.00752178	0.188245	0.0352874	0.349834
ENSMUSG00000100910	Gm29128	15.4373	0.00516031	0.188126	0.117886		4.68567	0.0240328	0.413742	0.217254
ENSMUSG00000100205	Gm4850	1083.47	-0.122286	0.241458	0.0301631	0.32915	814.932	-2.06984	1.00925	0.00121265	0.0358252
ENSMUSG00000100592	Gm28645	631.391	-0.00695896	0.182536	0.869835	0.994267	306.56	-0.244823	0.528625	0.00151307	0.0416386
ENSMUSG00000094215	Gm6489	2.76736	-0.000245075	0.187872	0.968806
ENSMUSG00000070960	Gm10307	39.3205	0.00883546	0.187995	0.475815	0.937154	18.5371	0.00685839	0.410516	0.891094
ENSMUSG00000026058	Khdrbs2	65.8002	0.0161065	0.188992	0.0439911	0.387312
ENSMUSG00000104498	RP23-109J14.3	18352.3	-0.0147945	0.150104	0.849469	0.993659	18229.6	0.154981	0.265998	0.475003	0.846804
ENSMUSG00000102917	RP23-75G11.4	7063.93	0.018684	0.162846	0.82425	0.992863	7106.53	0.237448	0.286054	0.273639	0.704421
ENSMUSG00000100481	Gm7114	9.90476	0.00223943	0.187901	0.782383		10.2466	0.0121052	0.411725	0.740787
ENSMUSG00000026134	Prim2	634.649	-0.0249211	0.184102	0.593227	0.965387	543.313	-0.113406	0.385785	0.500804	0.860279
ENSMUSG00000102714	RP24-423J19.3	70.9625	0.0160018	0.188501	0.306206	0.8593	54.8281	0.0432727	0.412143	0.483144	0.851365
ENSMUSG00000102093	Gm17813	3.66646	0.0049287	0.188111	0.259392
ENSMUSG00000103746	RP24-423J19.1	10.5263	0.00466232	0.188078	0.351517
ENSMUSG00000102198	RP24-423J19.7	19.9419	-0.00677982	0.188209	0.0610367		18.6001	-0.0288254	0.413981	0.241496
ENSMUSG00000004768	Rab23	914.846	0.0320913	0.183172	0.557134	0.956242	960.006	0.215089	0.407405	0.283584	0.713366
ENSMUSG00000103072	RP23-32P22.1	2.88556	-0.00473271	0.188108	0.302015		2.58411	-0.0226611	0.413624	0.330794
ENSMUSG00000042197	Zfp451	5387.22	-0.00373865	0.169443	0.955193	0.998605	4993.69	0.0387314	0.279531	0.858328	0.97406
ENSMUSG00000081402	Gm15455	3998.53	0.361993	0.390172	0.0225306	0.295154	2529.13	-0.0922661	0.304884	0.655517	0.925036
ENSMUSG00000042182	Bend6	36.3712	0.0120437	0.18834	0.295165	0.85185	9.86521	0.00259082	0.411125	0.957453
ENSMUSG00000104416	RP23-32P22.2	8.4347	-0.00484238	0.188118	0.174637		19.6024	0.00627205	0.411231	0.883193
ENSMUSG00000026131	Dst	16557.7	-0.105647	0.165793	0.290217	0.845639	15055.8	-0.149704	0.225889	0.427746	0.82385
ENSMUSG00000103596	RP23-87D8.2	24.1065	0.00842657	0.188302	0.0336602		34.117	0.0495644	0.417194	0.0126608	0.144682
ENSMUSG00000103364	RP23-87D8.4	10.3856	0.00340031	0.187977	0.620501
ENSMUSG00000096992	Gm26788	366.039	-0.0491597	0.194834	0.134548	0.65402	529.521	0.0449656	0.377954	0.782333	0.956869
ENSMUSG00000101206	Gm5266	43.9247	-0.010165	0.188214	0.326697	0.870573	34.0589	-0.0479102	0.416963	0.0169949	0.169991
ENSMUSG00000102336	mmu-mir-5103	257.214	0.0426546	0.193654	0.10581	0.584879	146.354	0.0733715	0.408302	0.488434	0.854213
ENSMUSG00000042111	Ccdc115	1658.88	0.201886	0.355257	0.017685	0.269184	790.889	-0.0876243	0.359901	0.635581	0.917766
ENSMUSG00000026127	Imp4	1266.13	0.0519891	0.185643	0.411818	0.918621	737.08	-0.300927	0.458286	0.15827	0.550661
ENSMUSG00000026126	Ptpn18	387.013	-0.0527034	0.195075	0.165374	0.709133	298.397	-0.361032	0.62149	0.0358042	0.245886
ENSMUSG00000100280	Gm28417	60.6086	0.00610118	0.187483	0.717696	0.989307	68.9618	0.0319865	0.410154	0.618537	0.912336
ENSMUSG00000104098	RP24-70I14.4	1092.03	0.0206631	0.178727	0.732279	0.989985	995.614	0.0589082	0.359532	0.752049	0.948818
ENSMUSG00000037509	Arhgef4	77.5501	-0.00283036	0.187434	0.842909	0.993659	49.5273	-0.0571298	0.414433	0.35867	0.782074
ENSMUSG00000037503	Fam168b	805.675	-0.0114503	0.180983	0.816101	0.992096	1012.45	0.244299	0.41034	0.246148	0.676257
ENSMUSG00000104358	RP23-348C6.1	5.77111	-0.00481467	0.188116	0.214053		6.50699	-0.0134398	0.412024	0.671255
ENSMUSG00000026123	Plekhb2	398.022	-0.0323127	0.189003	0.335835	0.874672	583.382	0.133844	0.385636	0.460635	0.837185
ENSMUSG00000103716	RP23-348C6.4	33.3808	0.00711154	0.18802	0.476536	0.937526	24.3962	0.0166778	0.411893	0.663408
ENSMUSG00000045216	Hs6st1	4216.32	-0.0316505	0.168321	0.68479	0.982354	4208.32	0.091874	0.280236	0.662973	0.92643
ENSMUSG00000037470	Uggt1	1241.45	0.00931725	0.177225	0.883373	0.994267	756.265	-0.533381	0.660731	0.0476381	0.286894
ENSMUSG00000037447	Arid5a	1230.91	0.00804025	0.178386	0.892623	0.994412	1172.43	0.0801926	0.344761	0.687795	0.933848
ENSMUSG00000010453	Kansl3	2048.15	-0.0429127	0.183138	0.479947	0.939356	1635.71	-0.354541	0.429463	0.137908	0.51283
ENSMUSG00000037432	Fer1l5	176.609	0.00794882	0.18621	0.780969	0.990658	383.988	0.359018	0.622777	0.0352363	0.243952
ENSMUSG00000001143	Lman2l	591.201	-0.0122871	0.182963	0.780266	0.990632	429.274	-0.15391	0.416624	0.31458	0.741072
ENSMUSG00000037408	Cnnm4	1355.98	-0.0342219	0.181083	0.567041	0.960028	1146.75	-0.186306	0.365763	0.370078	0.7898
ENSMUSG00000104316	RP23-294I17.4	156.13	-0.00977179	0.187193	0.639988	0.976337	94.2122	-0.0951166	0.427104	0.0786357	0.376327
ENSMUSG00000001138	Cnnm3	569.936	0.00667422	0.185321	0.844947	0.993659	304.848	-0.166288	0.444685	0.155794	0.544816
ENSMUSG00000079610	Ankrd39	54.8998	0.0123634	0.18816	0.394302	0.911459	19.7041	-0.00196555	0.409979	0.955307
ENSMUSG00000026121	Sema4c	214.253	-0.00503781	0.18618	0.845902	0.993659	227.411	0.0199072	0.396183	0.869764	0.977688
ENSMUSG00000087589	D430040D24Rik	12.4843	0.00513846	0.188125	0.133658
ENSMUSG00000046337	Fam178b	48.2061	0.00121629	0.187392	0.948593	0.99784	44.2582	0.00585843	0.407833	0.93903	0.988466
ENSMUSG00000061518	Cox5b	1412.1	0.10174	0.212637	0.138512	0.662556	2300.83	1.7293	0.493013	2.83432e-05	0.00233995
ENSMUSG00000037351	Actr1b	272.572	-0.00781965	0.185615	0.785166	0.991001	150.364	-0.118706	0.434118	0.0878239	0.40124
ENSMUSG00000102416	RP23-247A1.6	34.4799	0.00836212	0.188256	0.182914	0.735771	38.678	0.0398031	0.41525	0.160251	0.553801
ENSMUSG00000026117	Zap70	71.2726	-0.0147659	0.188883	0.00984968	0.21031	72.5281	-0.0430862	0.414354	0.326919	0.753479
ENSMUSG00000026116	Tmem131	1394.59	-0.041904	0.182762	0.458216	0.931845	1221.61	-0.169296	0.361641	0.411286	0.815276
ENSMUSG00000103016	RP23-328J8.4	7.31841	0.00506581	0.18812	0.180829
ENSMUSG00000103159	RP23-328J8.3	9.04038	0.00508873	0.188122	0.160862
ENSMUSG00000050122	Vwa3b	23.6894	0.00250338	0.18781	0.807671		34.3103	0.0209498	0.411794	0.625399	0.914205
ENSMUSG00000026113	Inpp4a	3180.93	-0.0659588	0.180723	0.40141	0.915607	2636.1	-0.209304	0.381292	0.31563	0.74208
ENSMUSG00000026112	Coa5	290.378	0.00601662	0.18537	0.857945	0.994267	222.61	-0.0264421	0.392654	0.827696	0.967386
ENSMUSG00000026111	Unc50	6613.07	0.0203048	0.156984	0.821844	0.992863	5022.89	-0.240682	0.33102	0.280241	0.709915
ENSMUSG00000026110	Mgat4a	2116.68	0.0419492	0.182638	0.500399	0.942627	1695.45	0.0156637	0.317509	0.942014	0.989094
ENSMUSG00000026090	2010300C02Rik	371.356	-0.052539	0.195225	0.156311	0.696859	487.368	0.0205108	0.370463	0.907139	0.983093
ENSMUSG00000104365	RP23-402K6.2	34.0705	0.00896291	0.188323	0.0842641	0.515668	29.896	0.0348915	0.414797	0.122036	0.482652
ENSMUSG00000060771	Tsga10	1327.79	-0.0469585	0.185437	0.431552	0.924536	1686.42	0.182422	0.378031	0.372929	0.790697
ENSMUSG00000037216	Lipt1	435.751	-0.00283224	0.183549	0.935114	0.996346	283.458	-0.16837	0.432406	0.234452	0.662391
ENSMUSG00000026088	Mitd1	99.8212	0.0249208	0.189821	0.161615	0.705351	27.6922	-0.00242089	0.408947	0.953669
ENSMUSG00000026087	Mrpl30	69.8571	0.0267774	0.190733	0.0180172	0.270806	119.961	0.157485	0.458303	0.00268789	0.0599865
ENSMUSG00000061584	Lyg2	24.4162	-0.00585803	0.188164	0.0682923		33.783	-0.0126287	0.410076	0.789329	0.957676
ENSMUSG00000087374	Gm15457	8.92281	-0.0014858	0.187892	0.83306		55.1807	0.0544001	0.41639	0.241835	0.671603
ENSMUSG00000058407	Txndc9	1957.66	0.117864	0.22192	0.113659	0.605175	1648.86	0.251078	0.376582	0.260399	0.691053
ENSMUSG00000026083	Eif5b	10434.1	-0.11248	0.17911	0.252899	0.810741	12720	0.399951	0.285687	0.0722862	0.357923
ENSMUSG00000026082	Rev1	3171.33	0.0113218	0.166385	0.871439	0.994267	2846.21	0.0262552	0.301204	0.9029	0.982079
ENSMUSG00000103804	RP23-195A24.4	7.48737	-0.000282894	0.187867	0.96027		3.62368	-0.0229435	0.413683	0.282332
ENSMUSG00000037138	Aff3	969.407	0.0539818	0.191478	0.299142	0.853686	1395.14	0.911024	0.894528	0.0160786	0.164583
ENSMUSG00000085391	Gm16150	3.22871	0.00488917	0.188108	0.275668
ENSMUSG00000048814	Lonrf2	738.371	0.00773936	0.182512	0.868662	0.994267	1047.08	0.373685	0.533605	0.0979317	0.428072
ENSMUSG00000026080	Chst10	26.6648	-0.00563046	0.187994	0.504215	0.942627	37.2817	-0.00158185	0.410149	0.957781	0.99158
ENSMUSG00000026078	Pdcl3	150.986	0.00940437	0.186721	0.713259	0.988474	174.092	0.0903234	0.410265	0.430939	0.825591
ENSMUSG00000026077	Npas2	273.295	-0.058308	0.200615	0.0160846	0.258669	450.026	0.0220035	0.377413	0.892063	0.981639
ENSMUSG00000073702	Rpl31	884.301	0.021345	0.184489	0.626552	0.972797	688.676	0.000401793	0.367326	0.995452	0.99945
ENSMUSG00000003134	Tbc1d8	1836.25	-0.132675	0.23163	0.0956822	0.551544	1520.66	-0.439938	0.527197	0.0817082	0.386298
ENSMUSG00000102607	RP24-539E18.5	16.7893	0.00517838	0.188127	0.111969
ENSMUSG00000003135	Cnot11	1375.81	-0.117782	0.226038	0.0928656	0.542787	1378.36	-0.163769	0.357431	0.425246	0.822868
ENSMUSG00000085894	Gm15832	4.88325	-0.00480136	0.188114	0.233321		4.37311	-0.0230567	0.413708	0.257572
ENSMUSG00000077704	Snord89	13.2748	0.00483411	0.188064	0.407375		3.83296	0.0128912	0.411872	0.707636
ENSMUSG00000048234	Rnf149	844.439	-0.109033	0.224949	0.0685985	0.471464	648.287	-1.29199	0.909628	0.00600737	0.0942647
ENSMUSG00000064936	Gm23722	40.9712	0.00445268	0.187742	0.723164	0.989515	12.1254	-0.0234378	0.413792	0.149621
ENSMUSG00000097083	D930019O06Rik	2.66359	-0.00472337	0.188106	0.313555		2.38533	-0.0225071	0.413602	0.343026
ENSMUSG00000026074	Map4k4	4311.53	-0.0256241	0.165301	0.744142	0.989985	3678.21	-0.138834	0.299934	0.508657	0.863646
ENSMUSG00000026073	Il1r2	10.6544	-0.00485486	0.18812	0.153246		9.54133	-0.0233909	0.41378	0.17119
ENSMUSG00000026072	Il1r1	113.82	-0.0301527	0.191219	0.0524076	0.412448	239.636	0.0597708	0.400611	0.617356	0.912336
ENSMUSG00000103560	RP24-317P24.1	419.258	0.0216914	0.185224	0.597947	0.96654	355.217	0.0427536	0.384892	0.775552	0.955192
ENSMUSG00000070942	Il1rl2	9.7145	-0.00352307	0.188001	0.558859		8.02256	-0.0205671	0.413185	0.392157
ENSMUSG00000026070	Il18r1	19.9769	-0.00493742	0.188124	0.103651		17.89	-0.0235126	0.413809	0.119133
ENSMUSG00000026068	Il18rap	90.8183	-0.0273996	0.190961	0.00346137	0.118277	83.9378	-0.108913	0.433008	0.0316951	0.230265
ENSMUSG00000026065	Slc9a4	68.5591	0.00627028	0.187608	0.686706	0.982354	142.106	0.0868119	0.421608	0.213914	0.634197
ENSMUSG00000102676	RP23-346B12.4	3.01346	0.00487343	0.188107	0.285
ENSMUSG00000041945	Mfsd9	209.399	0.00343253	0.186371	0.898552	0.995091	115.774	-0.0569355	0.412646	0.421416	0.820852
ENSMUSG00000079588	Tmem182	678.048	-0.03636	0.187345	0.417591	0.919792	912.846	0.1604	0.384244	0.40637	0.812059
ENSMUSG00000101877	Gm8176	4.30051	0.00191911	0.187903	0.803477		3.87019	0.00919206	0.411506	0.802268
ENSMUSG00000101299	Gm28175	15.2306	0.00528651	0.188131	0.114767
ENSMUSG00000060424	Pantr1	34.3749	-0.0104905	0.188464	0.0126428	0.234847	35.4802	-0.0346692	0.413355	0.398414	0.807377
ENSMUSG00000045515	Pou3f3	255.335	0.0401864	0.194132	0.0117797	0.227787	227.41	0.137461	0.444514	0.036384	0.248649
ENSMUSG00000093436	Gm20646	13.7484	-0.00455358	0.188089	0.294167		39.7074	0.0167835	0.41089	0.730827	0.945201
ENSMUSG00000060679	Mrps9	258.935	0.00319912	0.186169	0.911284	0.995246	519.532	0.815473	1.16804	0.0180724	0.176287
ENSMUSG00000041907	Gpr45	11.9135	0.0043452	0.188049	0.442227		13.1892	0.0259171	0.413452	0.35827
ENSMUSG00000070939	Tgfbrap1	4449.08	-0.0656556	0.179628	0.408141	0.918033	4514.37	0.030196	0.306495	0.887988	0.981218
ENSMUSG00000041878	8430432A02Rik	20.8648	-0.00512357	0.188132	0.0952698		18.6851	-0.0235442	0.413812	0.116052
ENSMUSG00000010290	AI597479	908.051	0.0617914	0.194078	0.253328	0.810741	1200.76	1.04487	0.669693	0.00783663	0.109387
ENSMUSG00000094497	Gm8210	2.40131	0.000443506	0.187873	0.961543		5.47935	0.0154501	0.412175	0.63899
ENSMUSG00000066877	Nck2	45.9813	-0.000980331	0.18771	0.914284	0.995246	151.053	0.0863644	0.42135	0.220107	0.644472
ENSMUSG00000057363	Uxs1	2293.61	0.00506513	0.171187	0.943969	0.99729	1984.72	-0.035702	0.303601	0.858657	0.974179
ENSMUSG00000090243	Gm16103	4.64288	-0.00433933	0.18807	0.380718		7.17709	-0.00208893	0.411144	0.944839
ENSMUSG00000041763	Tpp2	1098.14	0.0559999	0.189937	0.353661	0.884987	933.12	0.112479	0.366638	0.555729	0.885192
ENSMUSG00000091844	Gm8251	150.382	-0.0270908	0.190625	0.0518075	0.410542	466.795	0.126503	0.424194	0.274375	0.704659
ENSMUSG00000026049	Tex30	487.477	-0.0171453	0.184786	0.660829	0.979326	370.488	-0.125764	0.412438	0.360111	0.782419
ENSMUSG00000026047	Kdelc1	66.8944	0.00270293	0.187208	0.889438	0.994267	79.3641	0.0266905	0.408761	0.70069	0.938813
ENSMUSG00000041684	Bivm	548.554	0.0205436	0.183751	0.656371	0.978449	432.508	-0.00475194	0.371749	0.969822	0.994458
ENSMUSG00000026048	Ercc5	181.931	0.00893043	0.186227	0.756501	0.989985	318.586	0.124429	0.42806	0.224894	0.649012
ENSMUSG00000056870	Gulp1	29.7439	-0.000151467	0.187782	0.972518	0.999351	13.9144	-0.0234268	0.413795	0.138214
ENSMUSG00000101701	4930521E06Rik	8.60989	0.00507207	0.188121	0.165317
ENSMUSG00000103071	RP24-541P18.1	855.894	-0.0382542	0.184569	0.479848	0.939356	1038.2	0.136222	0.367255	0.488971	0.854517
ENSMUSG00000100434	Gm3489	10.2104	-0.00485192	0.188119	0.156986		9.14378	-0.0233695	0.413777	0.175254
ENSMUSG00000026042	Col5a2	3.55145	-0.00476328	0.188111	0.273428		12.5518	0.0124552	0.411753	0.734215
ENSMUSG00000025995	Wdr75	1718.7	-0.992272	0.60226	0.00269024	0.104531	1814.25	-0.36096	0.394705	0.134472	0.507073
ENSMUSG00000084817	Gm5526	8.85575	0.00288795	0.187945	0.693675		5.14736	0.0077032	0.411377	0.840147
ENSMUSG00000098549	Gm5269	4.73544	0.00497347	0.188114	0.227702
ENSMUSG00000025993	Slc40a1	42.9211	0.00421343	0.187569	0.778483	0.990294	48.4972	0.023943	0.410202	0.68124	0.930518
ENSMUSG00000041144	Dnah7b	1460.26	0.0875436	0.204606	0.174132	0.721127	985.199	-0.00227173	0.340119	0.985636	0.997497
ENSMUSG00000096047	n-R5s211	8.05126	0.00297698	0.187951	0.678719		4.91665	0.00928645	0.411497	0.802947
ENSMUSG00000101337	Dnah7c	2414.18	0.0802776	0.193557	0.274019	0.83432	2439.83	0.362074	0.420294	0.136479	0.511102
ENSMUSG00000025986	Slc39a10	8509.05	0.0281683	0.158844	0.796544	0.991271	8092.63	0.135735	0.280224	0.519676	0.869763
ENSMUSG00000100213	Gm28151	8.17939	0.00506269	0.18812	0.1701		51.5424	0.0480184	0.416932	0.00880429	0.116346
ENSMUSG00000101447	Gm28826	35.1123	-0.0131401	0.188689	0.0335291	0.34363	40.5196	-0.0287437	0.411443	0.562273	0.887657
ENSMUSG00000081185	Gm4852	30.802	0.0124282	0.188594	0.0673241	0.466718
ENSMUSG00000064943	Gm23240	2.78367	0.00323056	0.187974	0.623059		2.91146	0.0167285	0.412408	0.584479
ENSMUSG00000026109	Tmeff2	147.695	0.0279542	0.189557	0.268086	0.826589	86.2643	0.020514	0.40587	0.804881	0.962596
ENSMUSG00000026107	Nabp1	2397.52	-0.0436458	0.177441	0.53836	0.953202	1851.79	-0.389418	0.42673	0.114758	0.464907
ENSMUSG00000099413	Gm17767	138.629	-0.0113867	0.186872	0.641357	0.976653	188.563	0.0339825	0.403009	0.733394	0.945441
ENSMUSG00000018417	Myo1b	1938.72	-0.100081	0.206877	0.175552	0.722857	2458.62	0.159795	0.352824	0.446034	0.832196
ENSMUSG00000100313	Gm28323	24.106	-0.00582422	0.188162	0.070616		21.7186	-0.0235036	0.413812	0.10589
ENSMUSG00000062939	Stat4	590.923	-0.032548	0.185572	0.487735	0.940602	728.96	0.113788	0.373392	0.539858	0.878874
ENSMUSG00000101628	Gm28177	13.096	-0.00485983	0.18812	0.136073		11.7279	-0.0234398	0.413791	0.15249
ENSMUSG00000026104	Stat1	5.28886	0.0031712	0.187965	0.644609
ENSMUSG00000026103	Gls	3378.73	0.0687919	0.186547	0.352526	0.884538	1918.87	-0.513596	0.560172	0.0576741	0.313232
ENSMUSG00000002881	Nab1	4746.51	-0.100116	0.187182	0.274965	0.834509	4613.84	-0.0528246	0.27837	0.793094	0.958704
ENSMUSG00000100007	Gm5527	9.30804	0.00226456	0.187913	0.772868		3.86537	-0.0051314	0.411285	0.880914
ENSMUSG00000043015	Tmem194b	72.7251	0.0140561	0.18877	0.0413291	0.376624
ENSMUSG00000041439	Mfsd6	866.652	-0.00878118	0.181094	0.854276	0.994212	1021.41	0.207913	0.385014	0.315767	0.74208
ENSMUSG00000026102	Inpp1	9.90137	0.00510201	0.188123	0.152801		29.0111	0.0375345	0.415292	0.0316142	0.230124
ENSMUSG00000041426	Hibch	5.19281	0.00331355	0.187975	0.623309
ENSMUSG00000043629	1700019D03Rik	125.625	-0.0004698	0.186517	0.97543	0.999351	57.9371	-0.0860084	0.426008	0.0113729	0.135592
ENSMUSG00000026100	Mstn	58.7806	0.0121421	0.188607	0.00415546	0.129899
ENSMUSG00000026098	Pms1	377.371	0.00349659	0.184857	0.925587	0.995492	377.224	0.0518387	0.38824	0.721673	0.943296
ENSMUSG00000026096	Osgepl1	321.051	-0.0466086	0.193329	0.182676	0.73543	361.232	-0.0561	0.383979	0.702701	0.939755
ENSMUSG00000026095	Asnsd1	86.0688	0.00782056	0.187342	0.686892	0.982354	384.224	2.30713	2.07342	0.0034302	0.0670891
ENSMUSG00000096141	Dnah7a	599.796	0.00743287	0.182381	0.874959	0.994267	700.151	0.1933	0.410379	0.303968	0.731518
ENSMUSG00000026094	Stk17b	874.091	0.0785556	0.208709	0.0535664	0.417799	377.503	-0.00962182	0.387897	0.933975	0.986996
ENSMUSG00000042807	Hecw2	697.427	-0.0363413	0.18645	0.444092	0.927867	734.359	-0.00416102	0.357678	0.975432	0.995935
ENSMUSG00000094013	Gm25829	3.07493	0.00333949	0.18798	0.608482
ENSMUSG00000025983	Ccdc150	88.1029	0.0114228	0.187709	0.536889	0.953202	49.1885	0.00065091	0.407047	0.996534	0.99945
ENSMUSG00000041303	Gtf3c3	824.874	0.00536801	0.179966	0.924873	0.995492	567.422	-0.148306	0.407643	0.35544	0.779121
ENSMUSG00000073678	Pgap1	161.932	-0.0160529	0.188283	0.360644	0.888872	122.026	-0.177158	0.464524	0.0376324	0.253594
ENSMUSG00000052331	Ankrd44	35051.2	0.0761165	0.152233	0.322432	0.868528	35312.7	0.421312	0.229591	0.0313521	0.22913
ENSMUSG00000102503	RP23-388I22.1	4.88325	-0.00480136	0.188114	0.233321		4.37311	-0.0230567	0.413708	0.257572
ENSMUSG00000102642	RP23-68O7.2	45.7952	0.00485995	0.187776	0.691412	0.984033	67.4246	0.0455619	0.413271	0.424662	0.822291
ENSMUSG00000025982	Sf3b1	9354.99	0.0716754	0.169792	0.428865	0.92359	6501.64	-0.403499	0.288	0.0695928	0.350767
ENSMUSG00000025981	Coq10b	709.779	0.0654273	0.197142	0.200889	0.758251	662.469	0.162968	0.417417	0.313477	0.73988
ENSMUSG00000101122	Gm17971	8.3633	-0.00484181	0.188118	0.17551		30.294	0.0173142	0.411555	0.683961	0.931124
ENSMUSG00000025980	Hspd1	5146.31	-0.021441	0.160988	0.796404	0.991271	4263.59	-0.184472	0.297211	0.383843	0.799238
ENSMUSG00000073676	Hspe1	1699.2	-0.0967915	0.204	0.190626	0.746554	1951.23	0.0687258	0.32883	0.733543	0.945441
ENSMUSG00000089670	Gm16581	13.6707	0.00606297	0.18811	0.336445
ENSMUSG00000025979	Mob4	671.43	-0.0759328	0.206174	0.0760525	0.494576	687.09	-0.1926	0.413211	0.2912	0.720722
ENSMUSG00000025978	Rftn2	264.881	-0.0315943	0.190246	0.225324	0.786429	260.007	-0.0515334	0.407588	0.553783	0.885073
ENSMUSG00000097649	Gm10561	14.6368	0.00515554	0.188126	0.121639		12.7183	0.0248179	0.413848	0.124248
ENSMUSG00000046994	Mars2	1221.49	-0.0201838	0.178694	0.729451	0.989854	1068.83	-0.0566942	0.369871	0.734034	0.945441
ENSMUSG00000025977	Boll	69.2562	0.00743874	0.187733	0.614039	0.971707	47.12	0.00972252	0.409933	0.86268	0.9758
ENSMUSG00000038349	Plcl1	206.261	0.0169727	0.187223	0.536072	0.953202	225.449	0.0855795	0.411879	0.418685	0.819046
ENSMUSG00000102145	RP23-453N3.4	36.5884	0.0110351	0.188193	0.366884	0.892977	24.7672	0.0280377	0.411592	0.578187
ENSMUSG00000099950	9130227L01Rik	232.481	0.00221513	0.186155	0.940639	0.99729	156.588	-0.0604132	0.404621	0.560559	0.886931
ENSMUSG00000038331	Satb2	3003.63	0.059486	0.182804	0.414193	0.918621	2322.56	-0.0221498	0.332954	0.904146	0.98235
ENSMUSG00000087022	9130024F11Rik	21.0181	-0.00740405	0.1882	0.212166		27.897	-0.0143189	0.40981	0.775957
ENSMUSG00000094128	Gm23943	5.51083	0.00285593	0.187946	0.690353
ENSMUSG00000097519	4930558J18Rik	43.687	-0.0144733	0.188859	0.00327843	0.116697	62.9387	-0.0172773	0.408307	0.776647	0.955912
ENSMUSG00000038323	1700066M21Rik	1496.02	-0.00291934	0.175986	0.95789	0.998605	1758.51	0.262616	0.398912	0.235434	0.663739
ENSMUSG00000048495	Tyw5	77.7813	-0.00109049	0.187021	0.945538	0.99729	108.925	0.0565408	0.407384	0.555078	0.885073
ENSMUSG00000025971	9430016H08Rik	89.1784	0.00461622	0.18753	0.769628	0.989985	59.3033	-0.000582186	0.409191	0.976415	0.995935
ENSMUSG00000038305	Spats2l	5.37521	-0.00480919	0.188115	0.222113		61.7138	0.0569165	0.417191	0.197734	0.611207
ENSMUSG00000054770	Kctd18	594.114	0.0033193	0.183005	0.943461	0.99729	535.214	0.0155191	0.364672	0.933861	0.986996
ENSMUSG00000026039	Sgol2	1478.44	-0.0330979	0.178247	0.609812	0.970019	1596.52	0.0842295	0.357357	0.66071	0.926415
ENSMUSG00000063558	Aox1	17.7573	-0.00481617	0.188119	0.113506		15.9022	-0.0234878	0.413804	0.1278
ENSMUSG00000038242	Aox4	171.415	-0.0464047	0.196323	0.00493222	0.142033	177.972	-0.10419	0.424269	0.214701	0.635481
ENSMUSG00000079554	Aox2	78.0115	0.0034471	0.187321	0.848743	0.993659	66.2655	0.0107433	0.405048	0.903051	0.982079
ENSMUSG00000051223	Bzw1	7880.54	0.0666712	0.166338	0.464196	0.934302	5773.98	-0.261945	0.283154	0.221545	0.646013
ENSMUSG00000026034	Clk1	1596.89	0.0117048	0.178667	0.842744	0.993659	1031.78	-0.424402	0.506409	0.0903651	0.407345
ENSMUSG00000026035	Ppil3	86.898	0.024387	0.190013	0.0925809	0.541689	45.1935	0.0476752	0.413674	0.400633	0.808892
ENSMUSG00000026036	Nif3l1	242.216	-0.00699018	0.186211	0.791049	0.991121	329.833	0.0950241	0.402201	0.48935	0.854541
ENSMUSG00000026037	Orc2	4214.98	0.0621895	0.172526	0.467439	0.935693	4204.72	0.292578	0.327936	0.198365	0.612296
ENSMUSG00000094245	Gm23966	3.91465	0.00310189	0.187963	0.649737		6.03366	0.0189267	0.412715	0.516202
ENSMUSG00000038174	Fam126b	10110.1	0.064601	0.164714	0.480299	0.939356	9252.32	0.158184	0.26165	0.443889	0.832196
ENSMUSG00000026032	Ndufb3	53.3186	0.00140155	0.18758	0.928339	0.995758	29.7942	-0.0185375	0.411087	0.672931	0.929431
ENSMUSG00000059647	Gm10068	15.9416	0.00204339	0.187792	0.847355		7.7376	-0.00938965	0.411568	0.779483
ENSMUSG00000047528	Als2cr12	12.0755	-0.00164956	0.187897	0.81394		37.6401	0.039471	0.41264	0.466139	0.840725
ENSMUSG00000026031	Cflar	648.161	-0.00603726	0.181661	0.894181	0.99447	565.304	-0.0401768	0.365574	0.810556	0.963697
ENSMUSG00000026029	Casp8	49.3023	0.0025821	0.187374	0.881503	0.994267	270.317	2.7515	1.45807	0.00128992	0.0373101
ENSMUSG00000099719	Gm28802	103.414	-0.00790038	0.187381	0.660177	0.979223	128.06	0.0126842	0.401609	0.90367	0.98235
ENSMUSG00000026028	Trak2	2864.12	-0.00122657	0.173529	0.98359	0.999472	2028.58	-0.287523	0.426118	0.184937	0.592747
ENSMUSG00000026027	Stradb	8457.34	0.0162171	0.156016	0.854728	0.994212	9236.39	0.425785	0.275837	0.0520183	0.297566
ENSMUSG00000072295	Als2cr11	40.7745	-0.00857301	0.188255	0.206459	0.766364	69.0558	0.000933899	0.407361	0.998323	0.99945
ENSMUSG00000038079	Tmem237	2.66359	-0.00472337	0.188106	0.313555		36.542	0.035113	0.414278	0.286424	0.716701
ENSMUSG00000079550	Mpp4	55.3099	-0.0142697	0.188655	0.164192	0.707645	74.542	-0.0250671	0.405713	0.74721	0.948352
ENSMUSG00000101586	Gm29017	8.4347	-0.00484238	0.188118	0.174637		12.2392	-0.00504002	0.411242	0.879864
ENSMUSG00000026024	Als2	3635.37	-0.0784302	0.181223	0.351281	0.884538	3601.42	-0.00894303	0.27476	0.961459	0.992406
ENSMUSG00000026023	Cdk15	237.859	0.0592324	0.200013	0.0499173	0.403081	197.794	0.190491	0.458788	0.124079	0.48663
ENSMUSG00000099922	Gm29016	268.291	0.025728	0.187765	0.434197	0.924536	600.018	1.52432	1.47145	0.00626262	0.0966657
ENSMUSG00000104502	RP24-149E13.2	14.4751	-0.000988581	0.187877	0.884676		32.0488	0.0180659	0.411529	0.676816	0.930269
ENSMUSG00000041075	Fzd7	3803.05	0.0846736	0.19011	0.299342	0.853782	2047.78	-0.795846	0.669621	0.0194624	0.182817
ENSMUSG00000097819	Gm26813	473.644	0.0284928	0.187761	0.42703	0.921885	330.967	0.0120762	0.39609	0.923562	0.986164
ENSMUSG00000047361	Gm973	449.886	-0.0473943	0.194781	0.109724	0.595998	318.268	-4.78023	1.1034	5.26239e-07	7.2652e-05
ENSMUSG00000099811	Gm28411	7.87134	-0.0048381	0.188118	0.181438		23.157	0.0112288	0.411371	0.785121
ENSMUSG00000026021	Sumo1	6691.67	0.277913	0.347281	0.0363867	0.353027	6558.76	0.694981	0.353868	0.0094375	0.120781
ENSMUSG00000103821	RP24-147G7.2	39.4164	-0.000945132	0.18774	0.91406	0.995246	19.8778	-0.0235275	0.413812	0.111777
ENSMUSG00000026020	Nop58	5051.3	-0.0528969	0.1704	0.622504	0.972654	3128.85	-1.45254	0.492465	0.000204201	0.0105167
ENSMUSG00000077345	Snord70	10.9692	0.00446961	0.188018	0.512174		12.5689	0.0228458	0.412978	0.456873
ENSMUSG00000089093	Snord11	7.88878	0.00180459	0.187894	0.832481		6.42913	0.00654613	0.411291	0.868893
ENSMUSG00000067336	Bmpr2	11169.7	-0.0124847	0.158645	0.878244	0.994267	9958.39	-0.0452324	0.235725	0.813232	0.963847
ENSMUSG00000041040	Fam117b	12555.2	0.523746	0.277068	0.00408412	0.129101	10169.3	0.314637	0.282553	0.146022	0.526846
ENSMUSG00000103696	RP23-27C10.2	95.9076	-0.00372861	0.187406	0.804724	0.991606	52.8953	-0.0458569	0.416075	0.142959	0.520311
ENSMUSG00000100901	Gm18829	42.711	0.00417393	0.187838	0.698021	0.985319	35.3118	0.0186008	0.410419	0.72798	0.944157
ENSMUSG00000026018	Ica1l	520.94	0.037019	0.187593	0.412747	0.918621	555.805	0.222217	0.43824	0.222486	0.646764
ENSMUSG00000026019	Wdr12	1233.3	-0.130861	0.238479	0.0718318	0.481448	898.873	-1.55545	0.745807	0.00165681	0.0443318
ENSMUSG00000026017	Carf	227.101	0.0236713	0.187576	0.45586	0.930548	211.973	0.0948973	0.406176	0.460499	0.837185
ENSMUSG00000073664	Nbeal1	3250.66	-0.0678322	0.180286	0.394069	0.911459	2739.21	-0.277371	0.345612	0.222705	0.647078
ENSMUSG00000049439	Cyp20a1	418.332	-0.0122738	0.186239	0.670616	0.981835	535.812	0.0850613	0.390288	0.581216	0.895927
ENSMUSG00000103822	RP23-264G9.1	11.0983	-0.00485663	0.18812	0.149723		9.93889	-0.0233876	0.413781	0.16736
ENSMUSG00000026782	Abi2	745.426	-0.000237775	0.182105	0.989794	0.999472	655.519	-0.0164787	0.36021	0.922961	0.985912
ENSMUSG00000026014	Raph1	1401.28	0.00121948	0.175071	0.990534	0.999472	1403.13	0.115625	0.341251	0.576268	0.894092
ENSMUSG00000082160	Gm11578	6.82805	0.00504102	0.188119	0.188012
ENSMUSG00000101188	Eif4a-ps4	528.332	0.0318865	0.185989	0.488346	0.940602	570.951	0.241915	0.438269	0.213924	0.634197
ENSMUSG00000026011	Ctla4	84.8931	0.00156626	0.187466	0.92812	0.995758	35.3676	-0.0443936	0.416378	0.0199563	0.185758
ENSMUSG00000102561	RP23-148E7.2	25.9051	0.00914349	0.188194	0.329504	0.871428	13.7033	0.0187106	0.41202	0.622827
ENSMUSG00000085248	Gm11587	81.655	0.00142603	0.186927	0.953079	0.998333	76.7977	0.0096955	0.405183	0.91325	0.983596
ENSMUSG00000086408	Gm11588	10.2395	0.00414645	0.188033	0.483569		10.9272	0.0207325	0.413004	0.448462
ENSMUSG00000089546	Gm25839	42.3424	0.00923785	0.188302	0.181748	0.733627
ENSMUSG00000100965	Gm28449	181.906	0.00952948	0.186269	0.74105	0.989985	134.656	-0.00802546	0.397457	0.932035	0.986921
ENSMUSG00000100381	Gm28094	4.91959	-0.00480068	0.188114	0.232555		4.43237	-0.0230604	0.413709	0.255991
ENSMUSG00000052062	Pard3b	195.509	-0.0179066	0.187503	0.484777	0.940602	204.662	-0.0259116	0.397139	0.808746	0.963586
ENSMUSG00000085019	Pard3bos2	49.4523	-0.00416139	0.187671	0.735132	0.989985	39.6286	-0.0236293	0.410765	0.636959	0.917766
ENSMUSG00000100750	Gm29084	3.56589	0.00129533	0.187885	0.871664		3.68374	0.00856064	0.411454	0.818362
ENSMUSG00000025969	Nrp2	24.9948	-0.00409103	0.187872	0.658016		65.8051	0.0368332	0.411224	0.548742	0.883874
ENSMUSG00000100811	Gm29083	31.1214	0.0105432	0.188461	0.0144537	0.24647
ENSMUSG00000040865	Ino80d	16902.9	0.0507965	0.154848	0.559926	0.956393	14889.3	0.0645479	0.223284	0.733351	0.945441
ENSMUSG00000084799	Ino80dos	13.5158	-0.00479296	0.188088	0.320647		11.5748	-0.023434	0.413791	0.153633
ENSMUSG00000101599	Gm20342	10.3319	0.00511102	0.188123	0.149137		137.296	10.2889	3.86999	1.80388e-05	0.00160194
ENSMUSG00000025968	Ndufs1	605.377	-0.0113916	0.181997	0.80657	0.991606	330.302	-0.274366	0.541616	0.0253917	0.208998
ENSMUSG00000025967	Eef1b2	2042.44	-0.0423645	0.178173	0.53571	0.953202	2168.97	0.0923566	0.322618	0.652905	0.923713
ENSMUSG00000064602	Snora41	41.1026	-0.00198589	0.187502	0.87889	0.994267	37.3816	-0.00725387	0.408005	0.89707	0.982079
ENSMUSG00000046856	Gpr1	263.641	0.0138876	0.185623	0.688195	0.982869	173.821	-0.0360745	0.399491	0.729788	0.944814
ENSMUSG00000087561	Gm11608	2.44162	-0.00470517	0.188105	0.32643		2.18656	-0.0224606	0.413587	0.356651
ENSMUSG00000027520	Zdbf2	526.508	-0.0197326	0.183938	0.653342	0.978449	822.696	0.389147	0.516451	0.100669	0.43503
ENSMUSG00000081643	Gm11605	7.45441	-0.00368685	0.188014	0.528337		6.94209	-0.0163332	0.412439	0.577945
ENSMUSG00000025964	Adam23	27.6388	-0.0029433	0.187802	0.759364	0.989985	27.9065	-0.00947313	0.409418	0.849538
ENSMUSG00000025962	Fastkd2	370.397	-0.0358843	0.188941	0.348789	0.883652	337.705	-0.0960168	0.40072	0.483838	0.851616
ENSMUSG00000025959	Klf7	1759.68	-0.122143	0.230142	0.0876426	0.527323	2194.47	0.084067	0.324528	0.68634	0.933191
ENSMUSG00000025958	Creb1	543.712	0.0602007	0.19635	0.189732	0.745892	458.43	0.112462	0.405186	0.433894	0.826736
ENSMUSG00000025956	Mettl21a	77.7758	-0.0230115	0.190123	0.0016665	0.0811705	70.3354	-0.08881	0.426981	0.00757157	0.107051
ENSMUSG00000087213	2810408I11Rik	1920.73	-0.0734863	0.192721	0.281099	0.840066	2189.33	0.095943	0.316503	0.647634	0.921578
ENSMUSG00000070871	Ccnyl1	1558.87	-0.0200892	0.177482	0.722681	0.989515	1038.82	-0.517301	0.646422	0.0516114	0.29596
ENSMUSG00000045005	Fzd5	2446.88	1.57978	0.498896	6.09594e-05	0.0102249	809.727	-0.158649	0.380491	0.40818	0.812749
ENSMUSG00000102140	RP24-388P13.2	6.2729	0.00456538	0.188077	0.332456
ENSMUSG00000051344	Plekhm3	783.12	-0.0324057	0.185209	0.502064	0.942627	1035.81	0.212746	0.389073	0.304986	0.732196
ENSMUSG00000084416	Rpl10a-ps1	65.8748	0.00927718	0.187775	0.556887	0.956242	37.5357	0.00626921	0.407857	0.933322	0.986921
ENSMUSG00000025955	Akr1cl	57.9541	-0.0100143	0.188105	0.40086	0.915237	125.913	0.0579365	0.407056	0.554239	0.885073
ENSMUSG00000100774	Gm7329	314.965	-0.0110336	0.185396	0.735672	0.989985	289.108	-0.0332694	0.388592	0.800415	0.960907
ENSMUSG00000044816	D630023F18Rik	22.8162	0.00590039	0.188159	0.0743272		31.1826	0.0414205	0.415848	0.0230274	0.201011
ENSMUSG00000025950	Idh1	66.2437	0.00304176	0.187149	0.87904	0.994267	155.554	0.176181	0.456057	0.101868	0.437885
ENSMUSG00000025949	Pikfyve	3502.35	-0.0631847	0.178156	0.426584	0.921878	3320.32	-0.0705059	0.289323	0.764461	0.95215
ENSMUSG00000099383	Gm28925	12.7909	-0.00486226	0.18812	0.137986		11.5242	-0.0234319	0.41379	0.154049
ENSMUSG00000100340	Gm28923	14.672	0.000471592	0.187841	0.96929		8.49169	-0.0104228	0.411664	0.753808
ENSMUSG00000015222	Map2	1362.92	0.0239012	0.182091	0.65266	0.978449	1285.14	0.160673	0.349403	0.445387	0.832196
ENSMUSG00000055567	Unc80	406.757	-0.0236615	0.185851	0.543063	0.953202	623.428	0.225303	0.431914	0.234225	0.662102
ENSMUSG00000026005	Rpe	1297.75	-0.0196631	0.180474	0.714525	0.988974	1624.53	0.254518	0.399312	0.248503	0.677733
ENSMUSG00000026004	Kansl1l	882.912	-0.0662888	0.195886	0.227922	0.788873	1181.53	0.164168	0.364717	0.424478	0.82228
ENSMUSG00000102559	RP24-429G21.5	10.6544	-0.00485486	0.18812	0.153246		82.1811	0.0502368	0.415374	0.295898	0.72611
ENSMUSG00000082057	Gm15789	32.407	-0.00741139	0.188246	0.0336774	0.34363	58.4744	0.00137786	0.409269	0.994961	0.999385
ENSMUSG00000103706	RP24-429G21.2	18.2025	-0.00483052	0.18812	0.111827		16.3998	-0.0234988	0.413806	0.125507
ENSMUSG00000103756	RP24-429G21.1	26.6359	-0.00629469	0.188185	0.0558091	0.425313	23.8533	-0.0244055	0.413891	0.0944475
ENSMUSG00000103382	RP24-429G21.6	66.594	0.00618162	0.187864	0.601871	0.967966	30.2311	2.68684e-05	0.410487	0.984567	0.997497
ENSMUSG00000026003	Acadl	72.8632	0.0123932	0.187786	0.506337	0.942627	82.1457	0.0679703	0.413982	0.392385	0.803501
ENSMUSG00000026000	Lancl1	579.899	-0.0990526	0.225494	0.0112314	0.223458	808.337	-0.0393997	0.354654	0.824856	0.967081
ENSMUSG00000025991	Cps1	59.5349	-0.0150671	0.188931	0.00172434	0.0823174	105.997	0.000417579	0.404128	0.992835	0.998983
ENSMUSG00000086204	Gm15668	114.441	0.0391339	0.193684	0.0213755	0.292201	54.6866	0.0453388	0.413972	0.380624	0.797103
ENSMUSG00000087329	Gm15671	8.60989	0.00507207	0.188121	0.165317		30.5776	0.0402727	0.415678	0.0252694	0.208619
ENSMUSG00000062209	Erbb4	80.7199	-0.00123783	0.187453	0.920805	0.995246	39.1432	-0.050111	0.417361	0.0128167	0.145922
ENSMUSG00000101387	Pced1c-ps	13.2522	-0.00470112	0.188104	0.228497		12.2012	-0.0215992	0.413394	0.3217
ENSMUSG00000025997	Ikzf2	594.922	-0.0102213	0.182387	0.820436	0.992863	483.254	-0.0933158	0.384182	0.564477	0.888849
ENSMUSG00000053153	Spag16	280.502	0.0061818	0.185145	0.859091	0.994267	389.57	0.211341	0.447259	0.199491	0.613806
ENSMUSG00000045648	Vwc2l	93.1609	9.61631	3.61604	1.56355e-05	0.00370056
ENSMUSG00000026196	Bard1	758.875	0.00169014	0.181898	0.976513	0.999351	534.758	-0.168119	0.40654	0.335907	0.762345
ENSMUSG00000050296	Abca12	365.224	-0.0470461	0.193162	0.191924	0.748456	356.84	-0.122515	0.404756	0.406585	0.812059
ENSMUSG00000026192	Atic	778.499	-0.0416764	0.19008	0.309262	0.860601	594.648	-0.224402	0.470667	0.127693	0.493499
ENSMUSG00000026193	Fn1	557.448	-0.040044	0.187953	0.387494	0.907518	768.264	0.160425	0.390557	0.394069	0.804767
ENSMUSG00000073652	Apol7d	5.16557	-0.00480567	0.188115	0.226812		4.65399	-0.0230691	0.413714	0.249846
ENSMUSG00000101848	4933417E11Rik	125.418	-0.0043662	0.186708	0.839118	0.993242	151.242	0.0398252	0.399805	0.723661	0.943535
ENSMUSG00000102123	Gm4319	13.7758	0.00515155	0.188125	0.126116
ENSMUSG00000039395	Mreg	857.055	-0.0103669	0.180103	0.840167	0.993473	767.748	-0.0355849	0.352877	0.842013	0.970463
ENSMUSG00000094655	Gm25360	400.987	0.0144838	0.184137	0.728471	0.989854	422.139	0.130338	0.39715	0.434729	0.827384
ENSMUSG00000094050	Gm23472	901.041	0.1025	0.218249	0.0943604	0.547336	863.296	0.443314	0.543269	0.0796077	0.379094
ENSMUSG00000093956	Gm24497	904.738	0.107618	0.22249	0.0826552	0.510847	863.146	0.457866	0.554885	0.0736408	0.361691
ENSMUSG00000093843	Gm25939	434.576	0.0492454	0.19275	0.23848	0.800204	418.763	0.219238	0.444627	0.207736	0.624616
ENSMUSG00000026189	Pecr	1667.95	-0.0974387	0.206394	0.174188	0.721127	2105.03	0.156844	0.345207	0.455737	0.834776
ENSMUSG00000026188	Tmem169	1628.17	0.0712078	0.190467	0.310279	0.861062	1754.48	0.494646	0.458833	0.0660847	0.339601
ENSMUSG00000026187	Xrcc5	234.958	-0.0212273	0.187625	0.451806	0.930068	333.072	0.0665966	0.393414	0.635083	0.917658
ENSMUSG00000039372	March4	116.06	-0.0223445	0.188818	0.302717	0.855954	86.67	-0.0766714	0.420528	0.175415	0.577943
ENSMUSG00000039354	Smarcal1	1409.1	-0.0288907	0.178254	0.645785	0.977525	1584.24	0.164835	0.344866	0.431544	0.826146
ENSMUSG00000110712		22.1667	-0.00721244	0.188233	0.0494779		19.8617	-0.0275893	0.414183	0.0874948
ENSMUSG00000039342	Ankar	3.87421	-0.00368343	0.188015	0.52749		3.10266	-0.0228162	0.413657	0.304139
ENSMUSG00000110596		10.197	-0.00442986	0.188078	0.340338		8.74622	-0.02335	0.413773	0.179575
ENSMUSG00000046330	Rpl37a	831.012	0.0619114	0.193244	0.271313	0.832399	435.909	-0.151677	0.416852	0.315147	0.741664
ENSMUSG00000039323	Igfbp2	16.0044	-0.00617319	0.188154	0.2082		14.6568	-0.0228867	0.413414	0.334264
ENSMUSG00000026185	Igfbp5	215.896	-0.0307599	0.19133	0.0549315	0.42398	180.945	-0.237551	0.520637	0.00218095	0.0524061
ENSMUSG00000101968	1700027A15Rik	11.561	-0.00485835	0.18812	0.146295		20.4568	0.000312628	0.411059	0.990485
ENSMUSG00000026182	Tnp1	3.01346	0.00487343	0.188107	0.285
ENSMUSG00000102266	RP24-141F19.1	3.10752	-0.00474293	0.188109	0.291589		44.6817	0.0405249	0.414946	0.244095	0.674936
ENSMUSG00000099877	Pinc	9.7665	-0.00484912	0.188119	0.160966		8.74622	-0.02335	0.413773	0.179575
ENSMUSG00000100301	6030407O03Rik	52.5574	-0.0012954	0.187548	0.913188	0.995246	45.1731	-0.0110824	0.407231	0.860445	0.974847
ENSMUSG00000101344	Gm29183	76.8374	-0.0171127	0.188955	0.137668	0.660242	62.5255	-0.084363	0.425828	0.00105218	0.0328812
ENSMUSG00000055322	Tns1	17.6565	-0.00316126	0.187966	0.631473		12.9206	-0.0234357	0.413794	0.14427
ENSMUSG00000006304	Arpc2	3478.12	-0.167296	0.25004	0.0867433	0.52414	3680.4	-0.033111	0.322788	0.86461	0.976333
ENSMUSG00000006299	Aamp	1106.83	0.0856904	0.205998	0.147083	0.678374	882.559	0.176485	0.382037	0.379164	0.796107
ENSMUSG00000026179	Pnkd	614.27	-0.00990103	0.181481	0.833672	0.993242	430.58	-0.149143	0.418293	0.308693	0.735823
ENSMUSG00000006301	Tmbim1	3184.44	-0.00471877	0.167627	0.947436	0.997538	2691.3	-0.0802097	0.32842	0.688885	0.934142
ENSMUSG00000103403	RP23-280F6.6	5.16593	0.00499063	0.188116	0.217695
ENSMUSG00000073650	Catip	3.55145	-0.00476328	0.188111	0.273428		18.2094	0.0164704	0.412254	0.624821
ENSMUSG00000026177	Slc11a1	5.03856	-0.000201137	0.187869	0.970287		2.38533	-0.0225071	0.413602	0.343026
ENSMUSG00000026176	Ctdsp1	1993.67	0.0110146	0.172716	0.873243	0.994267	1962.68	0.132501	0.331337	0.522417	0.870941
ENSMUSG00000026175	Vil1	3495.12	-0.00638901	0.166314	0.931112	0.995758	4448.93	0.652492	0.348944	0.012886	0.146094
ENSMUSG00000033364	Usp37	15129.1	-0.00946303	0.149596	0.871493	0.994267	15538	0.241309	0.239187	0.221161	0.645831
ENSMUSG00000103227	RP23-102B12.2	225.118	0.00335641	0.185763	0.916702	0.995246	142.75	-0.0733013	0.408198	0.476066	0.847285
ENSMUSG00000026174	Rqcd1	1318.68	-0.00109487	0.175248	0.982003	0.999472	1142.51	-0.039449	0.332687	0.833002	0.967939
ENSMUSG00000026173	Plcd4	171.581	-0.000892668	0.185824	0.966315	0.999144	194.252	0.0579526	0.39723	0.649176	0.922717
ENSMUSG00000026135	Zfp142	3040.92	-0.000861272	0.167896	0.990584	0.999472	2248.3	-0.348515	0.371211	0.144338	0.523462
ENSMUSG00000026172	Bcs1l	152.129	0.00242504	0.186641	0.924902	0.995492	130.644	0.00267115	0.40143	0.987571	0.997958
ENSMUSG00000026171	Rnf25	585.036	-0.0129728	0.182388	0.773912	0.989985	472.629	-0.0927447	0.389129	0.546611	0.882688
ENSMUSG00000033276	Stk36	2449.95	-0.0897045	0.201622	0.200993	0.758302	2596.15	-0.0178624	0.348276	0.917699	0.984095
ENSMUSG00000033257	Ttll4	6698.23	0.0845808	0.180015	0.343199	0.878831	6954	0.426026	0.352922	0.0826409	0.38836
ENSMUSG00000026170	Cyp27a1	25.8661	-0.00215656	0.187782	0.816481	0.992096	84.3252	0.0418597	0.413274	0.426984	0.823746
ENSMUSG00000006542	Prkag3	38.3728	-0.00845481	0.188311	0.0207417	0.28935	39.2582	-0.0293712	0.413152	0.417378	0.818994
ENSMUSG00000089964	Gm16582	10.6544	-0.00485486	0.18812	0.153246		9.54133	-0.0233909	0.41378	0.17119
ENSMUSG00000090071	Cdk5r2	1088.82	-0.0302932	0.184749	0.525909	0.950562	972.512	-0.111298	0.374089	0.535801	0.877071
ENSMUSG00000055197	Fev	5.4424	-0.00206902	0.187916	0.765402		30.3685	0.0359486	0.413703	0.378752	0.796107
ENSMUSG00000006546	Cryba2	7.80988	-0.00429616	0.188065	0.385967		6.64856	-0.023256	0.413752	0.208081
ENSMUSG00000047021	Ccdc108	2.62328	-1.14798e-05	0.187871	0.99345		9.89463	0.0187459	0.412652	0.53456
ENSMUSG00000006538	Ihh	10.9843	0.00491164	0.188103	0.246388
ENSMUSG00000026162	Nhej1	349.095	0.0230997	0.18626	0.540444	0.953202	277.145	0.0348393	0.386991	0.822061	0.966471
ENSMUSG00000026205	Slc23a3	90.2264	0.0156853	0.188705	0.209997	0.769433	79.0523	0.102526	0.427032	0.149401	0.53278
ENSMUSG00000033159	Cnppd1	5489.38	-0.161945	0.221127	0.119197	0.618183	4581.21	-0.482812	0.369167	0.0565411	0.310986
ENSMUSG00000049339	Fam134a	571.495	0.068415	0.200443	0.141956	0.668296	312.03	-0.0217933	0.383809	0.87157	0.977688
ENSMUSG00000026197	Zfand2b	196.725	0.00270562	0.185863	0.938589	0.997047	104.754	-0.0896519	0.420487	0.247325	0.676741
ENSMUSG00000026198	Abcb6	12.8701	0.00514138	0.188125	0.131313		24.0243	0.0359235	0.415073	0.0410425
ENSMUSG00000033124	Atg9a	1061.67	0.0526386	0.18843	0.365039	0.891617	709.54	-0.0789987	0.36285	0.661205	0.926415
ENSMUSG00000026199	Ankzf1	200.864	-0.0465286	0.195243	0.0643404	0.454551	285.837	-0.0126309	0.386318	0.918992	0.984362
ENSMUSG00000026200	Glb1l	72.6341	-0.023745	0.190277	0.000143663	0.0179242	170.321	0.0598574	0.401217	0.611503	0.910067
ENSMUSG00000026201	Stk16	143.892	-0.00478924	0.187229	0.783067	0.990989	116.796	-0.0566814	0.40567	0.562806	0.887875
ENSMUSG00000026202	Tuba4a	1121.94	-0.000718261	0.178795	0.985183	0.999472	1170.97	0.136955	0.356239	0.499892	0.859759
ENSMUSG00000026203	Dnajb2	61.7234	0.00927128	0.187724	0.570888	0.961604	40.5435	0.00993446	0.40923	0.871115	0.977688
ENSMUSG00000026204	Ptprn	33.5625	-0.0139296	0.188711	0.0920169	0.539839	28.8111	-0.0405488	0.41578	0.030528	0.226738
ENSMUSG00000026209	Dnpep	78.8505	-0.0105262	0.18797	0.456968	0.930782	53.7972	-0.0753211	0.423154	0.00213058	0.0517053
ENSMUSG00000026208	Des	18.9404	-0.00484899	0.188121	0.109145		17.0646	-0.0235087	0.413807	0.122571
ENSMUSG00000026207	Speg	18.1027	-0.00606459	0.188121	0.308154		128.306	0.147421	0.445862	0.078306	0.375508
ENSMUSG00000033021	Gmppa	19.6396	0.0042256	0.187925	0.636109		57.4128	0.0668897	0.419371	0.146352	0.527633
ENSMUSG00000032997	Chpf	70.7686	-0.0112238	0.188123	0.391538	0.910355	64.9429	-0.042055	0.412196	0.465522	0.840247
ENSMUSG00000026211	Obsl1	98.3811	0.000622146	0.187304	0.983365	0.999472	43.9279	-0.0689157	0.421213	0.0234062	0.201965
ENSMUSG00000051703	Tmem198	29.7643	0.0109967	0.188428	0.149781	0.682468
ENSMUSG00000026213	Stk11ip	189.924	-0.0215509	0.187595	0.453401	0.930519	247.334	0.030099	0.394719	0.807609	0.963586
ENSMUSG00000006576	Slc4a3	24.4862	0.00705202	0.188124	0.35544		17.261	0.0268871	0.412993	0.45424
ENSMUSG00000100553	Gm17751	2158.68	-0.096894	0.200748	0.215808	0.775874	2255.84	-0.00711474	0.337698	0.956179	0.990913
ENSMUSG00000026235	Epha4	1447.35	0.0135208	0.178452	0.821362	0.992863	1269.51	0.0224705	0.326949	0.91531	0.984095
ENSMUSG00000099141	Mir6352	23.5284	-0.00567874	0.188155	0.0741277		21.0704	-0.0235105	0.413812	0.107866
ENSMUSG00000101849	Gm28386	37.5063	0.00149652	0.187755	0.900493	0.995173	22.0542	-0.00699924	0.411189	0.84015
ENSMUSG00000102052	Gm28387	30.7484	-0.000581101	0.187781	0.935264	0.996346	17.0859	-0.0205888	0.412841	0.476558
ENSMUSG00000004872	Pax3	89.1575	0.0227002	0.19001	0.0110741	0.223091	14.9466	0.0193264	0.412693	0.526008
ENSMUSG00000118426		24.7831	-0.00161222	0.187838	0.84089		14.639	-0.0219465	0.413465	0.294177
ENSMUSG00000032908	Sgpp2	71.8901	-0.0143236	0.188821	0.0211427	0.290976	89.9425	-0.0291442	0.409931	0.622697	0.914205
ENSMUSG00000026245	Farsb	1436.09	-0.0386312	0.180555	0.542695	0.953202	1866.43	0.32851	0.40187	0.166119	0.563063
ENSMUSG00000090486	BC035947	15.1014	-0.00469073	0.188054	0.424122		12.3699	-0.0234406	0.413793	0.147924
ENSMUSG00000012187	Mogat1	73.3889	-0.0241304	0.190351	0.000129094	0.0169476	87.841	-0.0740276	0.413998	0.377586	0.795202
ENSMUSG00000099364	5730419F03Rik	71.0146	0.0177484	0.189136	0.0787753	0.500799	3.578	-0.0229369	0.413681	0.284038
ENSMUSG00000032883	Acsl3	3652.2	-0.0221476	0.167936	0.677945	0.981835	4080.97	0.263816	0.314345	0.238277	0.667575
ENSMUSG00000079470	Utp14b	6699.79	0.0388911	0.164789	0.641547	0.976677	4526.71	-0.495841	0.392942	0.0569809	0.311695
ENSMUSG00000099377	Gm6159	23.4621	0.00184544	0.187689	0.885497		61.2888	0.0659358	0.417147	0.274421	0.704668
ENSMUSG00000054702	Ap1s3	230.406	-0.0235062	0.187463	0.454541	0.930519	210.524	-0.077466	0.400302	0.539337	0.878701
ENSMUSG00000073643	Wdfy1	321.369	0.0136666	0.18538	0.702034	0.986161	432.417	0.238812	0.464894	0.161806	0.557065
ENSMUSG00000026248	Mrpl44	151.382	-0.00922614	0.186928	0.68265	0.981835	286.142	0.176256	0.437288	0.222262	0.646709
ENSMUSG00000026249	Serpine2	1237.88	-0.00644038	0.176754	0.911658	0.995246	812.841	-0.411895	0.5531	0.0818256	0.386541
ENSMUSG00000100397	Gm28071	24.5043	0.00355737	0.187915	0.682504		5.367	-0.0231537	0.413731	0.232395
ENSMUSG00000096297	Gm23934	3.41871	-0.00247592	0.187937	0.715601		4.16813	-0.00250982	0.411176	0.938442
ENSMUSG00000099552	9830004L10Rik	2265.28	0.0419956	0.177295	0.558752	0.956242	2450.99	0.378153	0.398074	0.124426	0.487176
ENSMUSG00000043230	Fam124b	39.667	0.0100542	0.188406	0.0594512	0.437973	16.8384	0.0237244	0.413581	0.264301
ENSMUSG00000101257	2310015K22Rik	398.682	0.0580459	0.197848	0.11787	0.615309	337.087	0.205444	0.448593	0.192374	0.604073
ENSMUSG00000004364	Cul3	8116.93	-0.144081	0.214899	0.160235	0.703943	5561.73	-1.50906	0.338414	6.13855e-07	8.19921e-05
ENSMUSG00000103076	RP24-193D9.4	99.2044	-0.0328449	0.192355	1.06744e-05	0.00288018	91.1322	-0.116496	0.437011	0.0090595	0.117812
ENSMUSG00000103525	RP24-193D9.3	105.599	-0.0161772	0.188461	0.313477	0.863098	176.574	0.0183187	0.405387	0.831626	0.967939
ENSMUSG00000101722	Gm29125	144.704	-0.00917554	0.186636	0.70943	0.987738	139.75	-0.0178628	0.397983	0.857962	0.97406
ENSMUSG00000038608	Dock10	340.064	0.0120961	0.185152	0.738083	0.989985	309.278	0.0486773	0.387979	0.737141	0.946101
ENSMUSG00000054976	Nyap2	74.0212	-0.000531392	0.187483	0.957531	0.998605	129.139	0.0721545	0.412859	0.417508	0.818994
ENSMUSG00000055980	Irs1	166.745	0.0115392	0.186692	0.668383	0.981353	103.901	-0.0146775	0.406421	0.832045	0.967939
ENSMUSG00000026142	Rhbdd1	162.547	-0.0026528	0.186732	0.895216	0.99447	115.437	-0.0631451	0.407978	0.507087	0.863134
ENSMUSG00000100786	Gm28940	1135.44	-0.00154031	0.176634	0.976898	0.999351	927.838	-0.0946597	0.352582	0.622019	0.914138
ENSMUSG00000096779	Gm22112	181.054	-0.0116085	0.186764	0.648961	0.977689	139.766	-0.0900623	0.412537	0.3919	0.803409
ENSMUSG00000067158	Col4a4	3.37465	-0.00228643	0.187927	0.741544		2.58977	-0.0167483	0.412528	0.554006
ENSMUSG00000079465	Col4a3	446.999	-0.0878313	0.217848	0.00690095	0.170789	684.365	-0.00179251	0.365757	0.984837	0.997497
ENSMUSG00000097564	C430014B12Rik	30.6449	0.0102968	0.188441	0.0157504	0.256198
ENSMUSG00000026150	Mff	6401.57	0.0140067	0.161584	0.86971	0.994267	7017.03	0.396823	0.307451	0.0855925	0.396224
ENSMUSG00000026159	Agfg1	3372.52	0.0778245	0.185351	0.338267	0.876031	2819.44	0.088913	0.291089	0.674565	0.929746
ENSMUSG00000101784	Gm7553	18.6398	-0.00157099	0.187752	0.86917		17.6486	-0.00409004	0.410244	0.916878
ENSMUSG00000038496	Slc19a3	6602.37	-0.0653417	0.186213	0.332514	0.872566	4021.54	-2.32726	0.382765	6.76292e-11	1.48144e-08
ENSMUSG00000100432	Gm7539	37.9864	0.00200719	0.187671	0.878657	0.994267	27.3508	-0.00116719	0.409937	0.967069
ENSMUSG00000100190	Krtap28-10	5.32718	-0.00480839	0.188115	0.223136		14.142	0.00844301	0.41138	0.831934
ENSMUSG00000026166	Ccl20	18.6944	-0.00487482	0.188122	0.110022		16.843	-0.0235065	0.413807	0.123531
ENSMUSG00000053161	Daw1	651.017	-0.0368921	0.185981	0.456882	0.930782	826.128	0.146419	0.375596	0.451122	0.833474
ENSMUSG00000101896	Gm6244	9.10689	0.00508986	0.188122	0.160274		60.5711	0.055251	0.418298	0.00446313	0.0794417
ENSMUSG00000100580	4933436I20Rik	5.54915	-0.00481204	0.188115	0.218469		4.96945	-0.0231039	0.413721	0.241641
ENSMUSG00000045658	Pid1	714.876	0.0147149	0.182291	0.761252	0.989985	837.806	0.23604	0.428462	0.233788	0.661655
ENSMUSG00000101934	Gm18304	19.9871	0.0051349	0.188074	0.392811
ENSMUSG00000036766	Dner	49.7097	0.00442297	0.18745	0.789372	0.991121	142.941	0.0838689	0.421816	0.187212	0.595605
ENSMUSG00000026219	Trip12	102783	-0.0776381	0.153501	0.4223	0.92121	119939	0.436357	0.237615	0.0293247	0.222221
ENSMUSG00000104503	RP23-447L15.3	122.738	-0.0264893	0.189752	0.207003	0.76703	105.036	-0.110669	0.426793	0.191007	0.601621
ENSMUSG00000073633	Fbxo36	516.273	-0.0286677	0.185397	0.519573	0.949285	316.004	-0.589087	1.25494	0.0106681	0.130035
ENSMUSG00000118590		46.7963	-0.0097819	0.188174	0.351685	0.884538	61.5251	-0.0158673	0.406179	0.822767	0.96676
ENSMUSG00000099693	Gm29284	101.647	-0.0216269	0.189038	0.249842	0.808229	109.385	-0.0544702	0.406103	0.565993	0.889463
ENSMUSG00000052477	C130026I21Rik	1890.46	-0.339617	0.6125	0.0173942	0.266838	1899.65	-0.270377	0.365602	0.231178	0.658739
ENSMUSG00000064281	Rpl19-ps1	3.67264	0.00374626	0.188008	0.542786		16.7927	0.0238491	0.413609	0.252578
ENSMUSG00000101279	Gm18342	96.171	-0.00812672	0.187478	0.636592	0.975694	69.449	-0.0757714	0.417333	0.292984	0.722412
ENSMUSG00000089844	A530032D15Rik	980.713	-0.0295922	0.180866	0.608383	0.969989	808.029	-0.175757	0.381715	0.373155	0.790697
ENSMUSG00000073631	Gm10553	109.043	0.0260821	0.190208	0.111181	0.597661	22.6551	-0.00299706	0.410477	0.931767
ENSMUSG00000072109	A530040E14Rik	704.613	0.0156025	0.181818	0.759109	0.989985	490.208	-0.117145	0.388587	0.481922	0.851201
ENSMUSG00000090128	Gm16038	13.12	-0.00486004	0.18812	0.135928		18.5821	-0.00662467	0.411026	0.853864
ENSMUSG00000089716	Gm6264	968.63	-0.0990684	0.21546	0.101041	0.56919	957.888	-0.191205	0.380377	0.346972	0.771575
ENSMUSG00000079457	Gm7609	7.37215	0.00266986	0.187934	0.718941		27.8779	0.0401407	0.414956	0.234651
ENSMUSG00000090252	Gm16028	77.9664	-0.00246266	0.187278	0.874515	0.994267	107.009	0.042741	0.405668	0.64645	0.921024
ENSMUSG00000079455	Gm16026	2997.53	-0.413965	0.837166	0.0131475	0.237661	2739.87	-0.753184	0.417105	0.0104254	0.128076
ENSMUSG00000091199	Gm2619	11.6986	-0.00486235	0.18812	0.145287		10.7376	-0.0223669	0.413556	0.264644
ENSMUSG00000118591		45.8233	-0.0148273	0.188891	0.0107404	0.220099	50.7901	-0.0355793	0.412413	0.4718	0.844457
ENSMUSG00000101751	Gm2427	143.186	0.00122714	0.186365	0.969931	0.999242	112.967	-0.0194824	0.400828	0.834222	0.968098
ENSMUSG00000089714	Gm16092	2.44162	-0.00470517	0.188105	0.32643		6.87223	0.00905241	0.41146	0.811774
ENSMUSG00000118607		107.701	-0.028876	0.190771	0.0886035	0.530084	105.458	-0.0874142	0.41932	0.269386	0.700166
ENSMUSG00000070034	Sp110	6336.61	-0.0493725	0.177108	0.506479	0.942627	5527.7	-0.208829	0.294753	0.330394	0.757362
ENSMUSG00000090103	Gm16094	38.0111	-0.0124898	0.188395	0.262858	0.820711	74.5667	0.0268875	0.405064	0.760468	0.950816
ENSMUSG00000070031	Sp140	1096.63	-0.00727271	0.181072	0.876527	0.994267	872.052	-0.128483	0.376718	0.486625	0.853662
ENSMUSG00000073628	Gm10552	110.185	-0.0121672	0.187262	0.583799	0.963116	121.42	-0.00641502	0.400357	0.938301	0.988446
ENSMUSG00000090246	Gm17017	12.0102	-0.00488631	0.188121	0.143086		10.7568	-0.0234029	0.413785	0.160124
ENSMUSG00000026222	Sp100	105.648	0.00533193	0.187123	0.794804	0.991121	195.067	0.163863	0.44582	0.145806	0.526357
ENSMUSG00000052760	A630001G21Rik	137.418	0.0043839	0.187375	0.804474	0.991606	163.443	0.0499603	0.409178	0.550287	0.883874
ENSMUSG00000100217	9930111H07Rik	7.35824	-0.00287524	0.187958	0.661523		10.0045	-0.00091864	0.411115	0.967732
ENSMUSG00000092932	Gm22906	7.32487	-0.00483349	0.188117	0.188599		6.55967	-0.0232519	0.413751	0.209482
ENSMUSG00000036707	Cab39	8758.89	-0.0755961	0.167812	0.411085	0.918621	8139.57	-0.0812307	0.240276	0.677105	0.930269
ENSMUSG00000026223	Itm2c	56.4754	-0.0151504	0.18894	0.00183463	0.0849468	51.2503	-0.0641789	0.420034	0.0299049	0.224003
ENSMUSG00000100108	Gm28100	8.3633	-0.00484181	0.188118	0.17551		7.53503	-0.0233021	0.413762	0.194709
ENSMUSG00000099342	Gm18180	72.4903	-0.0206526	0.18923	0.174565	0.721399	66.1488	-0.0770813	0.418727	0.251463	0.681545
ENSMUSG00000026226	Spata3	19.311	-0.00487594	0.188122	0.10784		17.2937	-0.0235097	0.413808	0.121579
ENSMUSG00000026227	2810459M11Rik	76.1956	0.00393826	0.187684	0.767818	0.989985	24.8213	-0.0252023	0.413962	0.0874561
ENSMUSG00000026229	Psmd1	1817.75	0.152034	0.259185	0.0589315	0.436441	1629.26	0.487092	0.466506	0.0700186	0.351626
ENSMUSG00000077274	Gm22786	55.1333	0.0222543	0.189834	0.0433705	0.385404	19.6909	0.0316795	0.413203	0.426564
ENSMUSG00000026228	Htr2b	20.9621	-0.00683955	0.188212	0.0574355		18.8765	-0.0262768	0.414055	0.0977458
ENSMUSG00000103272	RP24-308M3.2	21.0942	0.00553673	0.188142	0.0879332
ENSMUSG00000062590	Armc9	104.487	0.00703513	0.187588	0.662822	0.98002	78.8717	0.0228517	0.405616	0.787146	0.957113
ENSMUSG00000087538	Gm16341	19.2734	-0.00388997	0.187921	0.634755		17.1029	-0.0155614	0.411873	0.655105
ENSMUSG00000079445	B3gnt7	747.48	-0.0703144	0.19914	0.177762	0.727678	595.509	-0.382707	0.574455	0.0733097	0.361033
ENSMUSG00000026234	Ncl	27484.8	0.677651	0.313777	0.00180312	0.0843241	18025.6	0.0563058	0.233918	0.755887	0.949595
ENSMUSG00000064823	Snord82	167.667	0.0338542	0.190919	0.194046	0.750637	150.942	0.122504	0.425254	0.255659	0.685298
ENSMUSG00000073627	C130036L24Rik	234.281	-0.0015119	0.185996	0.937589	0.996978	515.328	0.384378	0.63414	0.0445981	0.276962
ENSMUSG00000101328	Rpl30-ps6	26.6359	-0.00629469	0.188185	0.0558091	0.425313	23.8533	-0.0244055	0.413891	0.0944475
ENSMUSG00000026238	Ptma	8194.7	0.841759	0.299323	0.000268924	0.0270599	4000.4	-0.437614	0.343141	0.0689794	0.348911
ENSMUSG00000026239	Pde6d	160.228	0.0352132	0.191582	0.14651	0.676754	304.591	2.12775	1.54935	0.00320735	0.0646547
ENSMUSG00000026240	Cops7b	921.43	0.0786054	0.201062	0.186823	0.740706	831.173	0.222221	0.412794	0.267925	0.698657
ENSMUSG00000026241	Nppc	98.2516	0.0229113	0.18924	0.239671	0.801577	19.914	-0.0279201	0.413607	0.333523
ENSMUSG00000053333	Dis3l2	226.361	-0.012916	0.186359	0.651776	0.978184	396.233	0.221824	0.451621	0.189555	0.599692
ENSMUSG00000104121	RP23-26I10.1	5.36563	-0.00283666	0.187956	0.667996		6.77804	-0.00267563	0.411164	0.932221
ENSMUSG00000084106	Gm6136	238.601	0.0234399	0.187369	0.472516	0.936726	118.223	-0.0508062	0.4077	0.557043	0.886273
ENSMUSG00000099401	Gm28375	13.7749	-0.0048676	0.188121	0.132131		12.4106	-0.0234415	0.413793	0.147676
ENSMUSG00000103984	RP24-286D13.3	14.6368	0.00515554	0.188126	0.121639		4.76818	0.0240582	0.413745	0.214849
ENSMUSG00000101940	Akp-ps1	12.7909	-0.00486226	0.18812	0.137986		11.5242	-0.0234319	0.41379	0.154049
ENSMUSG00000101625	Gm29371	19.3844	-0.00610256	0.188175	0.0747332		17.6899	-0.0278707	0.414097	0.165069
ENSMUSG00000026246	Alppl2	3412.94	0.0802422	0.182404	0.344289	0.879972	1948.3	-0.843449	0.516223	0.0102438	0.126605
ENSMUSG00000079440	Alpi	9.7665	-0.00484912	0.188119	0.160966		42.2153	0.0250874	0.411942	0.578799	0.894549
ENSMUSG00000099839	Gm29374	30.3499	0.00743085	0.18824	0.0370773	0.356482
ENSMUSG00000026247	Ecel1	77.4609	0.00766814	0.187732	0.610156	0.970093	137.007	0.16726	0.453022	0.0940195	0.418026
ENSMUSG00000036480	Prss56	58.9519	0.00184676	0.187569	0.903585	0.995192	41.5291	-0.00424482	0.410018	0.914614	0.984095
ENSMUSG00000026251	Chrnd	115.36	-0.00574066	0.18731	0.738467	0.989985	117.006	-0.00830619	0.404134	0.909364	0.983288
ENSMUSG00000026253	Chrng	99.6959	0.0219397	0.189671	0.0861846	0.52189	163.821	0.152742	0.453884	0.0145036	0.155739
ENSMUSG00000026254	Eif4e2	1385.46	-0.0182737	0.177468	0.762421	0.989985	1200.29	-0.087187	0.347097	0.652235	0.923368
ENSMUSG00000026255	Efhd1	184.399	0.00598746	0.186079	0.836782	0.993242	233.634	0.126159	0.415321	0.349853	0.773793
ENSMUSG00000089821	Efhd1os	10.5471	0.00511131	0.188123	0.147387
ENSMUSG00000048000	Gigyf2	3906.71	-0.00674297	0.167545	0.939394	0.99729	3667	0.0517053	0.28731	0.807695	0.963586
ENSMUSG00000079436	Kcnj13	26.5658	-0.00626983	0.188183	0.0564832	0.42639	23.9348	-0.0244163	0.413892	0.0941918
ENSMUSG00000026258	3110079O15Rik	15.0047	-0.00486523	0.188121	0.125616		13.5187	-0.0234272	0.413795	0.140575
ENSMUSG00000026259	Ngef	691.466	-0.0413855	0.18677	0.412121	0.918621	676.943	-0.0569131	0.363645	0.742991	0.947729
ENSMUSG00000079434	Neu2	17.8654	0.00446315	0.188041	0.46952		8.02046	0.0151407	0.41211	0.653885
ENSMUSG00000090994	Gm6153	8.73233	-0.0038615	0.188028	0.492801		7.0918	-0.023279	0.413757	0.201104
ENSMUSG00000026288	Inpp5d	560.618	-0.0507709	0.191742	0.281832	0.840593	476.934	-0.212272	0.433532	0.230599	0.658241
ENSMUSG00000026289	Atg16l1	1639.13	-0.0376688	0.178659	0.568853	0.960846	1607	0.00147305	0.318906	0.993928	0.999158
ENSMUSG00000087968	Gm25395	2180.7	-0.0149372	0.170685	0.84154	0.993659	2537.11	0.307245	0.371877	0.190965	0.601604
ENSMUSG00000089281	Scarna6	2445.2	0.00774242	0.17	0.916836	0.995246	2617.18	0.276704	0.336464	0.224813	0.649012
ENSMUSG00000056055	Sag	28.1916	-0.00991292	0.188359	0.148064	0.680546	108.711	0.0555176	0.413205	0.422255	0.821538
ENSMUSG00000070738	Dgkd	2359.72	-0.0749858	0.191858	0.269138	0.828374	2575.76	0.0549586	0.291797	0.796113	0.959318
ENSMUSG00000005501	Usp40	106.692	0.0156356	0.188565	0.275243	0.834705	152.933	0.11598	0.432923	0.0990536	0.43095
ENSMUSG00000081984	Dnajb3	6.88791	0.00514755	0.188123	0.186886
ENSMUSG00000079429	Mroh2a	639.731	0.0941121	0.216122	0.0690921	0.472809	1340.49	2.50074	0.636095	4.13352e-06	0.000455769
ENSMUSG00000044783	Hjurp	8787.67	0.169216	0.256863	0.0847094	0.516676	6207.56	0.0276379	0.297808	0.916911	0.984095
ENSMUSG00000062310	Glrp1	33.2949	-0.00757702	0.188255	0.0312342	0.33388	29.8167	-0.0293836	0.414375	0.0582247	0.315181
ENSMUSG00000049866	Arl4c	229.732	-0.00950575	0.186053	0.737776	0.989985	249.859	0.0108711	0.401893	0.917191	0.984095
ENSMUSG00000036206	Sh3bp4	805.342	0.0274764	0.183802	0.579635	0.961814	690.157	0.0626084	0.365306	0.735939	0.945919
ENSMUSG00000101288	Gm28342	20.2666	0.00117119	0.187852	0.896955		7.35478	-0.0232938	0.41376	0.19718
ENSMUSG00000055013	Agap1	4751.78	-0.157767	0.22332	0.121289	0.623876	4875.77	-0.0366149	0.264349	0.853967	0.973144
ENSMUSG00000101662	Gm28499	27.2795	0.00302482	0.187676	0.815635	0.992096	102.49	0.148637	0.448421	0.0523003	0.29897
ENSMUSG00000034486	Gbx2	2218.66	0.0482007	0.178373	0.507315	0.94289	1383.76	-0.442173	0.469959	0.0867441	0.398637
ENSMUSG00000092627	D130058E05Rik	81.0783	0.00607918	0.187607	0.691844	0.984072	25.2645	-0.025582	0.413997	0.0843183
ENSMUSG00000067081	Asb18	18.8365	0.0062806	0.188177	0.0753607
ENSMUSG00000026301	Iqca	8148.57	0.0290478	0.163384	0.726189	0.989787	8939.52	0.413905	0.334089	0.0840838	0.392211
ENSMUSG00000044337	Ackr3	64.7818	-0.0103111	0.188162	0.364631	0.891494	48.6647	-0.0575925	0.418836	0.00638886	0.0974583
ENSMUSG00000103292	RP24-393L8.1	44.1712	-0.00947823	0.188384	0.0130133	0.236931	66.8821	-0.00880096	0.409186	0.859937	0.974766
ENSMUSG00000034432	Cops8	1140.87	0.0490037	0.185103	0.42922	0.92359	862.455	-0.0155869	0.34808	0.928387	0.986921
ENSMUSG00000048126	Col6a3	844.489	-0.000226721	0.181236	0.985552	0.999472	1285.6	0.350975	0.527724	0.101121	0.436155
ENSMUSG00000026303	Mlph	25.7102	0.00542689	0.187969	0.549846	0.955798	92.545	0.0859527	0.424927	0.0645784	0.335652
ENSMUSG00000026305	Lrrfip1	17688.7	-0.0351961	0.147484	0.703174	0.986726	18422.9	0.244383	0.228861	0.201994	0.61705
ENSMUSG00000070732	Rbm44	2052.15	-0.0267411	0.176166	0.68406	0.982354	2107.33	0.0819629	0.325365	0.69364	0.936166
ENSMUSG00000034343	Ube2f	399.517	0.0465522	0.192351	0.237254	0.79896	232.268	-0.00419939	0.39562	0.96134	0.992406
ENSMUSG00000083064	Gm7785	8.55466	-0.00259001	0.18794	0.70107		5.96086	-0.0232113	0.413742	0.220281
ENSMUSG00000026307	Scly	112.008	-0.008343	0.186892	0.708608	0.987738	133.656	0.0227367	0.39856	0.840542	0.969911
ENSMUSG00000049515	Espnl	16.4446	0.0040511	0.187971	0.597483		10.0226	0.0117721	0.411692	0.748978
ENSMUSG00000026308	Klhl30	87.817	0.00390392	0.187431	0.816737	0.992096	57.9144	-0.00729288	0.408075	0.894655	0.98198
ENSMUSG00000047443	Fam132b	170.973	0.000300566	0.18652	0.998819	0.999472	76.6862	-0.107149	0.433984	0.00024531	0.0120304
ENSMUSG00000026309	Ilkap	185.343	-0.0165438	0.186862	0.559781	0.956242	202.993	-0.00222454	0.392142	0.977558	0.996111
ENSMUSG00000067071	Hes6	314.172	0.0485167	0.195905	0.0643795	0.454551	190.955	0.144727	0.42946	0.244944	0.675653
ENSMUSG00000055866	Per2	137.026	-0.0249193	0.190157	0.0736684	0.487564	169.886	-0.0628614	0.405809	0.537404	0.878187
ENSMUSG00000034292	Traf3ip1	10.0646	0.00514728	0.188124	0.151393		24.1527	0.0350404	0.414961	0.0432209
ENSMUSG00000026311	Asb1	11.1929	0.00511788	0.188124	0.14243		56.6835	0.0650551	0.420453	0.00256988	0.0583157
ENSMUSG00000026313	Hdac4	460.37	-0.00640061	0.18335	0.870868	0.994267	285.73	-0.118212	0.423913	0.255814	0.685298
ENSMUSG00000026260	Ndufa10	665.062	0.02003	0.186348	0.56743	0.960174	642.989	0.197813	0.406819	0.305276	0.732196
ENSMUSG00000067064	Olfr1416	13.7749	-0.0048676	0.188121	0.132131		12.4106	-0.0234415	0.413793	0.147676
ENSMUSG00000073616	Myeov2	408.074	-0.0208301	0.185453	0.582414	0.962769	452.048	0.0305936	0.3754	0.853506	0.973091
ENSMUSG00000100546	Gm29483	263.521	-0.00957882	0.185389	0.764864	0.989985	215.366	-0.0497904	0.400348	0.649337	0.922736
ENSMUSG00000034220	Gpc1	307.685	-0.0390549	0.190753	0.260104	0.817735	295.205	-0.109974	0.40293	0.441237	0.830778
ENSMUSG00000034212	Ankmy1	55.4485	0.0168879	0.189155	0.00118155	0.0682292	61.9467	0.0896352	0.427473	0.000566902	0.0219144
ENSMUSG00000047067	Dusp28	18.5727	0.00549206	0.188122	0.238876
ENSMUSG00000097251	5033417F24Rik	5.90351	-0.0048169	0.188116	0.211618		5.31885	-0.0231465	0.413729	0.233566
ENSMUSG00000026269	Rnpepl1	324.096	-0.0281764	0.187483	0.434146	0.924536	316.227	-0.0610527	0.387935	0.669169	0.92844
ENSMUSG00000100632	9430060I03Rik	27.8607	0.00210581	0.187825	0.83559	0.993242	17.8457	0.000116317	0.411087	0.987176
ENSMUSG00000026270	Capn10	704.771	-0.0254976	0.186057	0.518462	0.948838	520.083	-0.241608	0.469986	0.146038	0.526846
ENSMUSG00000026271	Gpr35	1231.03	-0.0437683	0.184318	0.458846	0.931845	1113.5	-0.123886	0.35696	0.527691	0.873055
ENSMUSG00000014602	Kif1a	80.0591	-0.00404106	0.187503	0.776234	0.989985	55.9591	-0.0529152	0.413207	0.407389	0.812308
ENSMUSG00000047793	Sned1	243.234	0.0129161	0.186611	0.650096	0.978053	170.688	-0.00718807	0.393874	0.943284	0.989206
ENSMUSG00000026273	Mterf4	201.597	0.00831426	0.186473	0.757553	0.989985	245.023	0.0977644	0.411569	0.407789	0.812364
ENSMUSG00000101172	Gm28535	11.8749	0.00513102	0.188124	0.137735		35.7247	0.0520035	0.417646	0.0103859	0.127717
ENSMUSG00000026274	Pask	353.648	-0.0263278	0.187775	0.421378	0.920818	525.413	0.106472	0.396642	0.490454	0.855307
ENSMUSG00000026275	Ppp1r7	1837.82	0.0378828	0.182729	0.523968	0.949854	1660.25	0.140042	0.344412	0.501555	0.861078
ENSMUSG00000034107	Ano7	14.6513	0.0053187	0.188132	0.115805		23.1517	0.0346197	0.414907	0.0458658
ENSMUSG00000034088	Hdlbp	29885.3	0.158305	0.194201	0.141553	0.667224	28178	0.34692	0.269278	0.0971273	0.425475
ENSMUSG00000026276	Sept2	124.16	0.0169745	0.187709	0.47935	0.939184	45.524	-0.0514581	0.413777	0.382484	0.797846
ENSMUSG00000034066	Farp2	862.097	-0.0185736	0.180866	0.72462	0.989515	727.128	-0.104269	0.371766	0.561062	0.886931
ENSMUSG00000103854	RP23-302H1.1	96.9181	-0.0113516	0.187988	0.444843	0.928357	65.9103	-0.0885169	0.427163	0.000780692	0.026841
ENSMUSG00000026277	Stk25	2356.08	-0.0506379	0.180098	0.475308	0.937154	1984.36	-0.244728	0.357234	0.273187	0.703818
ENSMUSG00000026278	Bok	68.1956	0.0244224	0.190377	0.00179701	0.0843241	17.8472	0.0238099	0.413599	0.256636
ENSMUSG00000026279	Thap4	409.231	0.0231177	0.185828	0.559686	0.956242	293.091	-0.0120314	0.386279	0.922269	0.985576
ENSMUSG00000026280	Atg4b	745.629	-0.0431572	0.190395	0.301407	0.855154	874.333	0.0174033	0.35195	0.932009	0.986921
ENSMUSG00000026281	Dtymk	266.724	0.0422565	0.192206	0.204933	0.763873	106.057	-0.0393742	0.407308	0.620605	0.913609
ENSMUSG00000026283	Ing5	655.681	-0.0224679	0.183941	0.618449	0.971707	615.092	-0.050468	0.364455	0.768573	0.95353
ENSMUSG00000088961	Gm22089	7.1334	-0.00483158	0.188117	0.191379		6.42694	-0.0232438	0.413749	0.211816
ENSMUSG00000073609	D2hgdh	113.624	-0.00849708	0.187087	0.684512	0.982354	93.8609	-0.0476257	0.407103	0.581193	0.895927
ENSMUSG00000094651	Gal3st2	294.542	-0.0477576	0.194337	0.141411	0.666928	279.232	-0.0947284	0.412505	0.388301	0.801533
ENSMUSG00000101660	Gm18666	9.83819	-0.00411909	0.188044	0.448051		8.46606	-0.021418	0.413359	0.32599
ENSMUSG00000093805	Gm9994	118.5	-0.0311555	0.190963	0.123872	0.628016	119.241	-0.0773845	0.413715	0.38174	0.797408
ENSMUSG00000073608	Gm6086	351.739	0.00425037	0.185236	0.902544	0.995173	396.044	0.097632	0.399253	0.500168	0.859797
ENSMUSG00000034000	Neu4	42.1558	0.00950152	0.188379	0.0141669	0.245076
ENSMUSG00000100990	Gm7891	32.6559	0.00780239	0.188262	0.0310239	0.333609
ENSMUSG00000100347	Gm7895	334.914	-0.0117165	0.184681	0.741897	0.989985	345.336	0.0170052	0.382715	0.9136	0.983651
ENSMUSG00000099592	Gm5264	23.0845	-0.0055674	0.18815	0.0772441		20.6729	-0.023526	0.413813	0.109133
ENSMUSG00000051185	Fam174a	73.7064	-0.00444793	0.187594	0.740581	0.989985	79.8122	-0.00526844	0.405226	0.935081	0.987077
ENSMUSG00000081051	Gm15427	140.823	-0.00361857	0.186499	0.87217	0.994267	119.032	-0.0260231	0.40093	0.786156	0.957113
ENSMUSG00000040710	St8sia4	16.2035	-0.00487101	0.188121	0.119958		32.5841	0.00460615	0.410422	0.934312	0.986996
ENSMUSG00000095955	Gm22360	13.3453	0.00514066	0.188125	0.128511
ENSMUSG00000040693	Slco4c1	17.2825	-0.00496597	0.188027	0.475188		31.8909	0.00930987	0.408942	0.883375	0.979745
ENSMUSG00000044757	Gm6430	405.403	-0.0228655	0.185282	0.572712	0.961814	365.061	-0.0720299	0.386046	0.63153	0.915908
ENSMUSG00000044768	D1Ertd622e	4854.75	0.0660334	0.172206	0.449687	0.929383	5132.4	0.463726	0.317858	0.0513961	0.295378
ENSMUSG00000040648	Ppip5k2	24184	-0.184303	0.196022	0.106962	0.58796	23695	-0.0702672	0.212917	0.703391	0.939896
ENSMUSG00000026333	Gin1	16.0727	0.00188331	0.187854	0.839124		33.5512	0.0331592	0.412965	0.453842	0.834435
ENSMUSG00000026335	Pam	19.2707	-0.00477111	0.188071	0.381772		17.1051	-0.0206194	0.413193	0.385383
ENSMUSG00000089782	Gm3531	137.185	0.0158265	0.187487	0.518956	0.949205	176.73	0.153323	0.43625	0.201164	0.615648
ENSMUSG00000089791	Gm3555	35.2793	0.0051982	0.187653	0.714688	0.988974	17.9886	-0.0072402	0.410401	0.862069
ENSMUSG00000100009	Gm7967	11.4388	0.00491199	0.188102	0.247407		10.1202	0.0235877	0.41359	0.249639
ENSMUSG00000099686	Gm29460	8.87864	-0.00484533	0.188119	0.169758		7.95111	-0.0233212	0.413766	0.189107
ENSMUSG00000082431	Tdpx-ps1	22.5503	0.00559395	0.18799	0.52645		29.7953	0.0349639	0.413588	0.389083	0.802108
ENSMUSG00000050840	Cdh20	21.6462	-0.00527789	0.188138	0.0887294		70.8309	0.031159	0.41063	0.606702	0.907806
ENSMUSG00000103991	RP24-267G24.1	18.6944	-0.00487482	0.188122	0.110022		16.843	-0.0235065	0.413807	0.123531
ENSMUSG00000047496	Rnf152	125.474	-0.00057532	0.187059	0.965005	0.998605	211.947	0.13689	0.426143	0.264972	0.695079
ENSMUSG00000067017	Gm3608	316.24	0.00956569	0.185292	0.781881	0.990727	315.384	0.0799042	0.392503	0.589806	0.900718
ENSMUSG00000056536	Pign	999.078	0.00229408	0.180694	0.969424	0.999242	815.228	-0.0533924	0.371241	0.745181	0.947971
ENSMUSG00000026319	2310035C23Rik	2279.41	0.553752	0.645658	0.0100548	0.213014	1548.36	0.171975	0.346736	0.420074	0.820264
ENSMUSG00000104044	RP24-283P23.1	5.32718	-0.00480839	0.188115	0.223136		4.77067	-0.0230796	0.413716	0.246651
ENSMUSG00000101330	Gm10193	11.0323	0.000278675	0.187837	0.985711		15.6845	0.0137038	0.411054	0.760387
ENSMUSG00000026321	Tnfrsf11a	144.401	0.0238469	0.188777	0.331398	0.872566	154.512	0.0642709	0.413556	0.406746	0.812059
ENSMUSG00000038866	Zcchc2	4392.69	-0.136336	0.2168	0.148334	0.680753	4017.14	-0.192107	0.344416	0.370149	0.7898
ENSMUSG00000044340	Phlpp1	18.4436	-0.00144174	0.187877	0.8408		62.811	0.0478612	0.413909	0.388939	0.802108
ENSMUSG00000057329	Bcl2	23.3574	0.000283949	0.187758	0.990687		10.819	-0.0213493	0.413341	0.340858
ENSMUSG00000009905	Kdsr	420.509	-0.00390524	0.183492	0.916871	0.995246	228.595	-0.247918	0.51078	0.0435448	0.273679
ENSMUSG00000009907	Vps4b	996.599	-0.0239361	0.181411	0.65832	0.978734	868.885	-0.108995	0.359439	0.5683	0.89001
ENSMUSG00000067006	Serpinb5	43.9492	-0.00944772	0.188382	0.0132371	0.238665	67.1387	-0.00824843	0.409148	0.867899	0.977428
ENSMUSG00000059956	Serpinb12	25.6509	-0.0047108	0.187905	0.608375	0.969989	57.8516	0.0268141	0.409978	0.663814	0.926537
ENSMUSG00000044594	Serpinb3a	121.137	-0.0208523	0.188632	0.321092	0.867588	227.126	0.0863778	0.404969	0.491661	0.856146
ENSMUSG00000026315	Serpinb8	44.2253	-0.00884689	0.188074	0.414117	0.918621	116.387	0.0683331	0.411682	0.445887	0.832196
ENSMUSG00000096241	Gm24267	9.53066	0.00424456	0.188033	0.482209		4.69813	0.0154992	0.412192	0.634966
ENSMUSG00000100041	Gm5702	40.3585	0.0045889	0.187872	0.658543	0.978734	9.54133	-0.0233909	0.41378	0.17119
ENSMUSG00000047216	Cdh19	62.905	-0.00861532	0.187896	0.507423	0.94289	97.576	0.0209803	0.402279	0.832359	0.967939
ENSMUSG00000038702	Dsel	428.162	-0.0298042	0.188328	0.375267	0.899828	661.386	0.120899	0.400508	0.441356	0.830778
ENSMUSG00000101220	Gm6717	10.7624	0.00511358	0.188123	0.145687
ENSMUSG00000070695	Cntnap5a	11.8449	0.00100456	0.187873	0.911459		7.72002	-0.0026563	0.411161	0.93213
ENSMUSG00000107979		364.011	0.0873914	0.216637	0.0147085	0.248653	251.294	0.164429	0.442417	0.175075	0.577573
ENSMUSG00000101373	Zfp813-ps	2323.39	0.625963	0.764503	0.00890701	0.199564	2159.92	0.786284	0.594312	0.0188043	0.179343
ENSMUSG00000099615	Gm28362	245.083	-0.0274593	0.189013	0.316414	0.864464	233.322	-0.0968239	0.407197	0.436773	0.828595
ENSMUSG00000100265	Gm28363	135.207	0.0142755	0.187253	0.566157	0.95943	62.1584	-0.0378198	0.409894	0.569578	0.890691
ENSMUSG00000100527	Gm28359	8.17939	0.00506269	0.18812	0.1701
ENSMUSG00000101303	B020011L13Rik	1198.54	0.010515	0.177318	0.865272	0.994267	1575.23	0.586016	0.508724	0.0437058	0.273749
ENSMUSG00000100305	Gm28360	18.0996	0.00489587	0.188005	0.524202		25.7729	0.0316011	0.413605	0.372493
ENSMUSG00000100886	Gm7195	3.01346	0.00487343	0.188107	0.285		16.7483	0.0249975	0.41387	0.105111
ENSMUSG00000101415	Gm28168	47.9103	-0.00774254	0.187769	0.574382	0.961814	88.4182	0.0415198	0.406989	0.632625	0.916525
ENSMUSG00000100617	Gm7145	1590.28	-0.0108686	0.176088	0.857961	0.994267	1925.82	0.353185	0.398485	0.147908	0.530911
ENSMUSG00000100703	Gm28358	5.8133	-0.0048153	0.188116	0.213283		10.3618	0.000397139	0.411103	0.995714
ENSMUSG00000100177	Gm29489	7.99077	-0.00483912	0.188118	0.179893		92.1823	0.084042	0.423432	0.11664	0.469893
ENSMUSG00000102030	Gm29106	3520.68	0.196039	0.274313	0.0675657	0.46733	4082.77	1.01984	0.376186	0.000733585	0.0258074
ENSMUSG00000026374	Tsn	413.053	0.00559124	0.184194	0.888397	0.994267	295.473	-0.0736402	0.394545	0.584641	0.897586
ENSMUSG00000026377	Nifk	2520.4	-0.0602746	0.182842	0.404372	0.916593	1838.4	-0.733884	0.537011	0.0204884	0.187634
ENSMUSG00000099936	Gm28867	120.065	0.00187887	0.187507	0.909986	0.995246	77.9546	-0.0130971	0.409183	0.804284	0.962527
ENSMUSG00000064302	Clasp1	3916.01	-0.0305731	0.165365	0.70569	0.987488	3154.05	-0.279187	0.316879	0.209787	0.627168
ENSMUSG00000107722		15.2306	0.00528651	0.188131	0.114767
ENSMUSG00000100770	Gm28466	3.10752	-0.00474293	0.188109	0.291589		2.78289	-0.0227258	0.413638	0.319727
ENSMUSG00000026380	Tfcp2l1	883.35	0.0385397	0.184172	0.494591	0.941208	1024.3	0.430157	0.503678	0.0895444	0.405619
ENSMUSG00000089601	Gm22094	14.2668	-0.00487129	0.188121	0.129427		12.8539	-0.0234392	0.413794	0.144729
ENSMUSG00000048402	Gli2	68.0302	0.0063993	0.187322	0.734004	0.989985	27.9012	-0.0379716	0.413385	0.399614
ENSMUSG00000098923	Tmem185b	184.915	-0.0196848	0.187925	0.425713	0.921509	149.157	-0.113885	0.422323	0.269952	0.700528
ENSMUSG00000026383	Epb4.1l5	2095.1	-0.0281828	0.173049	0.693368	0.984225	2107.25	0.0689949	0.321206	0.739579	0.946923
ENSMUSG00000102687	RP23-386K20.6	23.1221	-0.00556471	0.18815	0.077334		20.8322	-0.0235264	0.413813	0.108636
ENSMUSG00000026384	Ptpn4	1122.86	0.0571092	0.190767	0.312925	0.862172	660.217	-0.157485	0.39312	0.385722	0.799916
ENSMUSG00000091876	Gm3851	3.83863	0.000193258	0.187869	0.987542		3.82421	0.00315655	0.411181	0.939594
ENSMUSG00000103146	RP23-274C16.4	61.9536	0.0173145	0.188867	0.19618	0.752917	100.299	0.120869	0.436534	0.0554995	0.309184
ENSMUSG00000090277	Gm8338	3.01346	0.00487343	0.188107	0.285
ENSMUSG00000036975	Tmem177	165.508	-0.00879221	0.186732	0.710832	0.987738	149.967	-0.0226374	0.403601	0.788919	0.957676
ENSMUSG00000036962	Cfap221	44.5573	0.0106755	0.18826	0.315798	0.864464	16.9398	0.0106951	0.411335	0.794545
ENSMUSG00000050777	Tmem37	42.2745	0.00347301	0.187804	0.752625	0.989985	12.4106	-0.0234415	0.413793	0.147676
ENSMUSG00000026385	Dbi	1378.43	0.763387	0.859928	0.00691123	0.170789	984.623	0.25031	0.434251	0.214574	0.635473
ENSMUSG00000026388	3110009E18Rik	333.71	0.0198042	0.186045	0.584429	0.963343	332.323	0.121973	0.402639	0.428932	0.824724
ENSMUSG00000026389	Steap3	15.836	0.00454499	0.188065	0.39616
ENSMUSG00000058665	En1	55.6408	-0.00294506	0.187466	0.833607	0.993242	60.1544	0.00315641	0.407778	0.973683	0.995589
ENSMUSG00000003721	Insig2	121.727	0.0126211	0.187993	0.453244	0.930519	60.9958	0.00488472	0.408336	0.949648	0.9904
ENSMUSG00000026339	Ccdc93	402.917	0.0142025	0.184891	0.711035	0.987738	504.287	0.175941	0.429367	0.259387	0.689711
ENSMUSG00000050534	Htr5b	136.398	-0.0327559	0.191819	0.0462211	0.394664	119.575	-0.142363	0.446257	0.0404125	0.263991
ENSMUSG00000001674	Ddx18	2135.1	-0.100927	0.201806	0.204362	0.763011	1571.84	-0.937229	0.574851	0.0088593	0.116346
ENSMUSG00000036815	Dpp10	817.315	0.00825639	0.181541	0.869512	0.994267	1088.06	0.41251	0.519629	0.0930612	0.415463
ENSMUSG00000026341	Actr3	14749.4	0.0442085	0.152997	0.569823	0.961182	13443.1	0.122617	0.235394	0.52243	0.870941
ENSMUSG00000026342	Slc35f5	127.627	-0.0133522	0.188048	0.418734	0.919792	98.6389	-0.128653	0.436303	0.109623	0.455146
ENSMUSG00000049690	Nckap5	1764.75	-0.0521068	0.185236	0.409167	0.91829	2375.21	0.306185	0.403042	0.186514	0.594917
ENSMUSG00000036155	Mgat5	291.257	-0.00527549	0.185467	0.851903	0.993659	281.009	0.00161748	0.389353	0.998449	0.99945
ENSMUSG00000099471	Gm8451	10.515	-0.000983669	0.187877	0.88748		5.77814	-0.0232006	0.413739	0.223829
ENSMUSG00000065687	Gm23734	62.6101	0.0104955	0.187707	0.551757	0.955798	64.216	0.0536105	0.411178	0.487428	0.853676
ENSMUSG00000026347	Tmem163	36.2173	0.0130969	0.18868	0.0341405	0.345809	6.77346	0.0215074	0.413185	0.393959
ENSMUSG00000026349	Ccnt2	4381.85	0.198893	0.275856	0.0647993	0.455983	4582.61	0.800076	0.354145	0.00370255	0.0707316
ENSMUSG00000051590	Map3k19	35.5288	-0.011226	0.188527	0.0102791	0.215392	32.4463	-0.0492783	0.416984	0.0657913	0.338942
ENSMUSG00000036104	Rab3gap1	5050.11	0.0409152	0.179642	0.534536	0.953202	4913.53	0.22515	0.350913	0.307816	0.734713
ENSMUSG00000036086	Zranb3	268.382	0.000720298	0.185246	0.987817	0.999472	373.666	0.152207	0.421485	0.300919	0.729843
ENSMUSG00000058603	Rpl28-ps1	29.4486	-0.00862073	0.188149	0.351244	0.884538	24.629	-0.0395859	0.414864	0.236901
ENSMUSG00000102782	RP23-264E23.2	14.5129	-0.00367375	0.188013	0.530387		41.6738	0.023959	0.410827	0.654663	0.924774
ENSMUSG00000103999	RP23-264E23.1	13.7484	-0.00455358	0.188089	0.294167		11.9267	-0.0234341	0.413791	0.151038
ENSMUSG00000056211	R3hdm1	7347.34	-0.289638	0.333013	0.0349264	0.34961	5958.64	-0.903013	0.342755	0.00109556	0.0335804
ENSMUSG00000104239	RP23-114N13.2	43.1351	-0.015758	0.189002	0.0097947	0.209402	78.1194	0.00196642	0.407096	0.990016	0.998219
ENSMUSG00000102179	RP23-114N13.3	102.702	-0.0107536	0.187929	0.468613	0.93589	68.9351	-0.0902639	0.427746	0.000660115	0.0241537
ENSMUSG00000026353	Ubxn4	5914.41	0.0718142	0.170096	0.42508	0.921359	4442.49	-0.135501	0.315224	0.51484	0.866735
ENSMUSG00000026354	Lct	36.7431	0.00137588	0.187659	0.921357	0.995246	17.492	-0.0193243	0.4124	0.553706
ENSMUSG00000026355	Mcm6	4081.83	0.0347502	0.166609	0.674131	0.981835	2640.83	-0.531103	0.485806	0.0540866	0.304103
ENSMUSG00000026356	Dars	782.721	-0.0128665	0.180574	0.814545	0.992096	927.201	0.178241	0.386662	0.368747	0.789335
ENSMUSG00000100078	Gm6170	12.7152	0.00168239	0.187833	0.86268		10.7283	0.00504214	0.411184	0.906494
ENSMUSG00000045382	Cxcr4	152.123	0.00436499	0.18741	0.80253	0.991606	97.2731	-0.0120057	0.406807	0.85332	0.973091
ENSMUSG00000042581	Thsd7b	1024.65	-0.00725008	0.180283	0.883707	0.994267	1177.42	0.220756	0.376034	0.30695	0.734135
ENSMUSG00000089648	Gm15790	5.59035	0.000670229	0.187871	0.940837		5.39735	0.00471362	0.411209	0.907905
ENSMUSG00000094122	Rpl31-ps9	3.15269	0.00141884	0.187889	0.857164
ENSMUSG00000026401	Daf2	147.119	-0.00685287	0.186735	0.760864	0.989985	112.056	-0.0652317	0.408255	0.496812	0.857998
ENSMUSG00000026399	Cd55	4747.07	-0.116312	0.198793	0.207525	0.767249	4262.63	-0.25493	0.297798	0.242293	0.672508
ENSMUSG00000103751	RP24-483O2.2	4.74995	0.00497275	0.188114	0.227742		15.3958	0.0249469	0.413864	0.1107
ENSMUSG00000042554	Zp3r	60.9844	-0.00767725	0.18777	0.575684	0.961814	40.7253	-0.0489218	0.416503	0.139724	0.514809
ENSMUSG00000026405	C4bp	17.7105	-0.0048737	0.188122	0.113707		15.9565	-0.0234862	0.413804	0.127564
ENSMUSG00000026409	Pfkfb2	110.65	-0.0109508	0.187092	0.627388	0.972955	91.8207	-0.0393973	0.408091	0.605307	0.907121
ENSMUSG00000046404	Yod1	155.838	0.00577456	0.186551	0.821825	0.992863	152.564	0.0433435	0.399633	0.704933	0.940349
ENSMUSG00000042510	AA986860	13.4683	0.00442337	0.188055	0.427093		74.3408	0.094852	0.428901	0.00799699	0.110631
ENSMUSG00000100106	Gm28856	97.6825	0.00735426	0.187325	0.701798	0.986161	82.5793	0.019875	0.406861	0.798231	0.959899
ENSMUSG00000026415	Fcamr	181.799	-0.0131986	0.187123	0.582413	0.962769	341.953	0.129243	0.420093	0.313618	0.73997
ENSMUSG00000026416	Il20	15.2507	-0.00486897	0.188121	0.124407		143.08	0.0703455	0.419485	0.182355	0.588913
ENSMUSG00000016528	Mapkapk2	1092.07	1.08513	0.867757	0.00409421	0.129101	433.781	-0.0297573	0.378674	0.839425	0.969495
ENSMUSG00000102856	RP23-122P5.3	122.157	0.0252027	0.190343	0.0395442	0.368962	43.4645	0.0303158	0.412825	0.47375	0.845781
ENSMUSG00000016526	Dyrk3	614.687	-0.0954054	0.21764	0.0589058	0.436441	739.471	-0.046098	0.358199	0.794096	0.958944
ENSMUSG00000026427	Eif2d	1209.5	-0.086993	0.203684	0.175882	0.723507	1260.54	-0.0703865	0.335764	0.719937	0.942965
ENSMUSG00000026430	Rassf5	1554.01	0.0265457	0.175882	0.699155	0.985538	1963.06	0.656794	0.464175	0.0258547	0.210802
ENSMUSG00000042349	Ikbke	55.3925	0.00261848	0.187616	0.848571	0.993659	52.1577	0.019323	0.4077	0.789748	0.95783
ENSMUSG00000026425	Srgap2	2466.58	0.00288479	0.168331	0.977251	0.999351	2279.89	0.0456578	0.29865	0.829346	0.967534
ENSMUSG00000102733	RP24-81A5.3	11.1929	0.00511788	0.188124	0.14243
ENSMUSG00000104060	RP24-81A5.2	5.59643	0.00500615	0.188117	0.208775		14.057	0.0248774	0.413856	0.116996
ENSMUSG00000101778	Gm29488	22.1966	-0.00545176	0.188145	0.0838806		83.469	0.0332422	0.411515	0.55519	0.885073
ENSMUSG00000055184	Fam72a	871.961	-0.0193193	0.180061	0.727286	0.989823	739.154	-0.0853208	0.374068	0.617575	0.912336
ENSMUSG00000095841	Gm8532	76.5929	0.0145976	0.18887	0.00131662	0.072778
ENSMUSG00000042268	Slc26a9	1197.35	0.0221374	0.178863	0.714868	0.988974	885.791	-0.108623	0.363091	0.560787	0.886931
ENSMUSG00000013275	Slc41a1	1553.13	-0.0222396	0.181251	0.67429	0.981835	1049.92	-0.450018	0.618518	0.0623446	0.329344
ENSMUSG00000026433	Rab29	179.048	-0.03117	0.1901	0.236053	0.797635	167.253	-0.10323	0.414825	0.355683	0.779201
ENSMUSG00000026434	Nucks1	2837.55	-0.0105008	0.17554	0.865074	0.994267	2469.75	-0.0772562	0.305806	0.688379	0.933848
ENSMUSG00000103569	RP24-325N3.3	279.493	-0.0365522	0.191982	0.126296	0.634622	252.514	-0.173741	0.450028	0.134237	0.506986
ENSMUSG00000026435	Slc45a3	7269.92	0.0967416	0.187104	0.284936	0.841098	4947.34	-0.290345	0.309095	0.194636	0.606539
ENSMUSG00000026436	Elk4	7659.07	0.0556367	0.161862	0.54102	0.953202	8735.01	0.58589	0.322073	0.0178363	0.174841
ENSMUSG00000059149	Mfsd4	982.526	0.0758654	0.19972	0.197207	0.753602	1052.4	0.436969	0.548703	0.0802446	0.381133
ENSMUSG00000103966	RP24-340N18.1	57.271	0.017333	0.189177	0.0200471	0.286653	39.7992	0.0600255	0.418875	0.0626633	0.330708
ENSMUSG00000026437	Cdk18	12.4843	0.00513846	0.188125	0.133658		25.0207	0.0353185	0.414997	0.0411967
ENSMUSG00000079330	Lemd1	36.8121	0.00856552	0.188312	0.0218351	0.292598	32.3349	0.033687	0.414799	0.037187	0.251521
ENSMUSG00000118219		35.6236	-0.0118887	0.188588	0.00856584	0.193323	41.5461	-0.029863	0.411456	0.554978	0.885073
ENSMUSG00000066936	Gm10188	12.299	-0.00486191	0.18812	0.141165		11.0809	-0.0234157	0.413788	0.157506
ENSMUSG00000009772	Nuak2	174.212	0.0418845	0.193813	0.0757248	0.494167	26.7498	-0.0374847	0.415347	0.0390285
ENSMUSG00000042066	Tmcc2	3876.21	-0.00629344	0.162835	0.94676	0.997437	3401.79	-0.0491849	0.2771	0.807538	0.963586
ENSMUSG00000042046	Dstyk	2014.42	-0.0541908	0.18743	0.366799	0.8929	2476.79	0.214781	0.334035	0.331293	0.758133
ENSMUSG00000026439	Rbbp5	576.399	0.0521335	0.193359	0.232955	0.793856	519.594	0.182808	0.421402	0.285336	0.715801
ENSMUSG00000048174	Tmem81	8.65667	-0.00484389	0.188119	0.172153		25.5138	0.0122995	0.411282	0.772984
ENSMUSG00000053024	Cntn2	382.722	0.0800665	0.209892	0.0464289	0.395233	269.638	0.145241	0.423407	0.291644	0.721057
ENSMUSG00000026442	Nfasc	61.4621	-0.0138933	0.188546	0.218589	0.779535	176.95	0.124996	0.422453	0.289478	0.719055
ENSMUSG00000088911	Gm22609	4.30494	0.00495384	0.188113	0.239037
ENSMUSG00000026443	Lrrn2	5.66361	0.00115853	0.187879	0.890175
ENSMUSG00000054387	Mdm4	131319	0.0260102	0.147883	0.697941	0.985315	131891	0.300732	0.222337	0.102753	0.440307
ENSMUSG00000026447	Pik3c2b	5410.59	0.00825786	0.164126	0.921202	0.995246	5200.16	0.125079	0.28252	0.55237	0.884319
ENSMUSG00000101102	Gm28609	10.3311	-0.00485248	0.188119	0.155987		9.30798	-0.0233767	0.413778	0.173592
ENSMUSG00000102425	RP23-304O9.1	76.4995	0.00937563	0.187514	0.616233	0.971707	24.2844	-0.0363002	0.414874	0.160932
ENSMUSG00000046062	Ppp1r15b	4009.8	0.0937863	0.196649	0.242369	0.803307	2511.44	-0.304174	0.368125	0.190317	0.600713
ENSMUSG00000041757	Plekha6	2692.44	0.0222044	0.16949	0.767845	0.989985	2549.61	0.13294	0.30067	0.533172	0.875406
ENSMUSG00000101693	Gm19461	161.518	0.00880827	0.186333	0.753457	0.989985	192.788	0.105553	0.411656	0.396771	0.806575
ENSMUSG00000070644	Etnk2	7.58143	-0.00427284	0.188063	0.391197		6.40657	-0.023243	0.413749	0.212095
ENSMUSG00000070643	Sox13	188.489	0.0166388	0.187527	0.506414	0.942627	63.1467	-0.064967	0.418847	0.153768	0.541036
ENSMUSG00000090553	Snrpe	1783.05	-0.0743245	0.190449	0.380355	0.903731	2576.6	0.579143	0.420607	0.0355983	0.245681
ENSMUSG00000102976	Zc3h11a	323.835	0.0401899	0.191563	0.224904	0.786429	259.784	0.103048	0.409708	0.417264	0.818994
ENSMUSG00000094410	Zbed6	1354.19	0.056017	0.189538	0.338798	0.876653	1083.5	0.0675531	0.358217	0.714375	0.94164
ENSMUSG00000051998	Lax1	15.5376	-0.00486946	0.188121	0.123009		47.1602	0.019149	0.410784	0.7076	0.94063
ENSMUSG00000026463	Atp2b4	1305.52	0.0237874	0.179851	0.680356	0.981835	975.398	-0.0964667	0.35415	0.613776	0.910621
ENSMUSG00000100830	Gm28441	6.45742	0.00502478	0.188118	0.193499
ENSMUSG00000010311	Optc	24.8007	-0.00588194	0.188033	0.457502		75.1452	0.035897	0.411157	0.556399	0.885592
ENSMUSG00000090208	Gm15851	3.44371	-0.00475865	0.18811	0.277732		3.10266	-0.0228162	0.413657	0.304139
ENSMUSG00000041577	Prelp	1215.4	-0.0684852	0.195001	0.247227	0.807851	1531.34	0.148667	0.346279	0.477442	0.847849
ENSMUSG00000020423	Btg2	586.302	-0.0178109	0.185036	0.630946	0.97378	457.983	-0.109318	0.408271	0.406843	0.812139
ENSMUSG00000026450	Chit1	1328.07	-0.0653438	0.192235	0.283296	0.841086	773.99	-0.039546	0.414584	0.26981	0.700528
ENSMUSG00000026458	Ppfia4	142.299	0.0300256	0.190327	0.19684	0.75329	57.7316	0.000871848	0.405939	0.998394	0.99945
ENSMUSG00000042305	Tmem183a	2920.72	-0.00379629	0.168851	0.95673	0.998605	2136.16	-0.29325	0.402933	0.195117	0.607059
ENSMUSG00000026456	Cyb5r1	36.7842	0.00455986	0.187777	0.704177	0.986838	16.1469	-0.00639758	0.411211	0.851314
ENSMUSG00000026457	Adipor1	1582.87	0.000756737	0.174506	0.994931	0.999472	1508.25	0.068033	0.324549	0.742642	0.947729
ENSMUSG00000101061	Gm29643	32.851	-0.00756125	0.188254	0.0324303	0.338533	29.4191	-0.0291493	0.414351	0.0600836	0.321117
ENSMUSG00000102722	RP24-547I3.2	10.3428	-0.00485264	0.188119	0.15587		9.2944	-0.023377	0.413778	0.173712
ENSMUSG00000026455	Klhl12	3160.09	-0.0621096	0.182315	0.403797	0.916464	2959.15	-0.0887406	0.317217	0.664453	0.926537
ENSMUSG00000042229	Rabif	639.87	-0.0187186	0.183373	0.683763	0.982336	519.353	-0.141872	0.393395	0.414718	0.816926
ENSMUSG00000096712	Gm15454	30.9416	0.00535418	0.187991	0.534775	0.953202	24.4517	0.0232202	0.412066	0.580217
ENSMUSG00000046367	Mgat4e	5.00829	0.00276675	0.187942	0.701208		51.5168	0.0836464	0.424998	0.0249297	0.207935
ENSMUSG00000042207	Kdm5b	9500.32	0.129141	0.188077	0.202342	0.760151	5403.42	-0.964658	0.421902	0.00232856	0.0543408
ENSMUSG00000097435	Gm26783	3.47083	0.00243747	0.187927	0.739954
ENSMUSG00000026452	Syt2	158.558	-0.0367927	0.192909	0.0325792	0.338533	227.162	-0.0207897	0.401899	0.816347	0.964979
ENSMUSG00000073557	Ppp1r12b	759.777	0.0082382	0.180334	0.879236	0.994267	535.4	-0.145987	0.397001	0.397113	0.806575
ENSMUSG00000103614	RP24-541A5.3	47.9217	-0.00968344	0.188176	0.348599	0.883405	36.7578	-0.0474726	0.416891	0.0160108	0.164298
ENSMUSG00000103976	RP24-541A5.1	132.996	0.0229859	0.189714	0.120785	0.62279	15.0944	-0.0205279	0.413172	0.394659
ENSMUSG00000101168	Gm28892	11.267	-0.00485556	0.18812	0.148471		10.1488	-0.0233924	0.413782	0.165464
ENSMUSG00000026429	Ube2t	711.318	0.0218858	0.185343	0.592608	0.965282	381.891	-0.181905	0.437158	0.21923	0.642706
ENSMUSG00000042793	Lgr6	108.247	-0.00774974	0.187035	0.710327	0.987738	187.442	0.059627	0.409064	0.517263	0.868717
ENSMUSG00000097993	Ptprv	172.481	-0.00210396	0.186634	0.917257	0.995246	94.6875	-0.0638749	0.417066	0.255839	0.685298
ENSMUSG00000031506	Ptpn7	38.8633	-0.0128939	0.188632	0.0735029	0.48693	34.3155	-0.0546702	0.41799	0.0513392	0.295378
ENSMUSG00000026426	Arl8a	379.225	-0.0451842	0.192292	0.223003	0.783472	360.163	-0.135457	0.40761	0.374749	0.792579
ENSMUSG00000079139	Gm4204	860.318	0.0219558	0.181696	0.679739	0.981835	1144.98	0.403692	0.543974	0.0886514	0.403311
ENSMUSG00000003051	Elf3	1058.52	0.0466702	0.188231	0.379809	0.903731	823.123	0.0401747	0.36917	0.818082	0.965262
ENSMUSG00000041926	Rnpep	399.784	0.0033312	0.184725	0.931778	0.995758	303.962	-0.0535636	0.389777	0.693981	0.936166
ENSMUSG00000062580	Timm17a	743.416	0.0274264	0.184771	0.560275	0.956403	573.073	0.00290109	0.36932	0.992635	0.998983
ENSMUSG00000048096	Lmod1	164.048	0.0377171	0.192971	0.0529103	0.414456	18.4246	-0.0255986	0.413992	0.103351
ENSMUSG00000041889	Shisa4	24.2824	0.00363394	0.187921	0.673464		5.16822	-0.0231296	0.413726	0.236897
ENSMUSG00000041879	Ipo9	3567.91	-0.0308092	0.175611	0.651919	0.978199	2994.09	-0.215632	0.324437	0.323146	0.74956
ENSMUSG00000009418	Nav1	1931.56	0.0435961	0.177662	0.544453	0.953517	2052.71	0.363786	0.384174	0.133236	0.504885
ENSMUSG00000054412	Gm4793	30.6618	-0.0100967	0.188431	0.016379	0.259418	28.8362	-0.0402244	0.415136	0.19573	0.608102
ENSMUSG00000026421	Csrp1	1294.16	0.0478128	0.187635	0.383253	0.906047	1465.45	0.619086	0.520413	0.0372306	0.251609
ENSMUSG00000026418	Tnni1	19.3074	-0.00461754	0.187989	0.534744		28.8519	0.000359732	0.41009	0.991593	0.998896
ENSMUSG00000041782	Lad1	24.106	-0.00582422	0.188162	0.070616		49.0439	0.00614145	0.409692	0.920284	0.984909
ENSMUSG00000101482	Gm28883	3.48084	0.00490496	0.18811	0.266307
ENSMUSG00000026413	Pkp1	17.383	0.00589539	0.188158	0.0882701
ENSMUSG00000051985	Igfn1	41.8419	0.00857632	0.18823	0.257801	0.815606	21.3317	0.0203321	0.412687	0.524409
ENSMUSG00000026411	Tmem9	35.8941	0.000339833	0.187669	0.990279	0.999472	19.5999	-0.0144127	0.412134	0.642525
ENSMUSG00000026407	Cacna1s	23.9723	-0.00581301	0.188162	0.0711437		21.468	-0.0235124	0.413812	0.106635
ENSMUSG00000102717	RP23-211F21.1	3.55145	-0.00476328	0.188111	0.273428		3.18044	-0.0228415	0.413662	0.30041
ENSMUSG00000041642	Kif21b	1005.92	-0.0174253	0.179411	0.753551	0.989985	981.372	0.0220412	0.343765	0.913349	0.983639
ENSMUSG00000087230	Mroh3	69.1488	0.0154375	0.188347	0.350038	0.884538	13.7725	-0.0234257	0.413795	0.13906
ENSMUSG00000041605	5730559C18Rik	5.30031	-0.00321084	0.18798	0.611936		16.5868	0.0140641	0.411787	0.707442
ENSMUSG00000103594	RP23-211F21.3	17.8053	-0.00569279	0.188155	0.0892577		15.9479	-0.0234892	0.413804	0.127584
ENSMUSG00000097433	Gm26781	44.8512	-0.00795959	0.187983	0.474473	0.937154	32.0551	-0.0449363	0.416461	0.0214183	0.192706
ENSMUSG00000041570	Camsap2	31470.2	0.171992	0.200584	0.13033	0.645274	29064.4	0.33189	0.250767	0.105177	0.44604
ENSMUSG00000026404	Ddx59	1081.27	0.040367	0.185629	0.45553	0.930548	866.638	0.0465047	0.351675	0.809118	0.963634
ENSMUSG00000041498	Kif14	13804.6	0.00306798	0.147776	0.974173	0.999351	13242.2	0.134064	0.237835	0.495479	0.857497
ENSMUSG00000099337	Gm29486	3.10752	-0.00474293	0.188109	0.291589		2.78289	-0.0227258	0.413638	0.319727
ENSMUSG00000104509	RP24-68C1.4	64.2056	0.00645773	0.187384	0.722729	0.989515	22.5942	-0.0344095	0.414625	0.179441
ENSMUSG00000104366	RP24-68C1.5	19.6156	-0.00489359	0.188012	0.498994		15.1071	-0.0234587	0.4138	0.131725
ENSMUSG00000097229	Gm26598	147.283	-0.00752748	0.187387	0.667106	0.981353	150.505	-0.0261078	0.397748	0.804882	0.962596
ENSMUSG00000041483	Zfp281	1053.34	0.0709182	0.198681	0.195481	0.75272	596.577	-0.0999127	0.378093	0.560881	0.886931
ENSMUSG00000097113	Gm19705	165.643	-0.0160043	0.187472	0.505301	0.942627	145.684	-0.0666355	0.407079	0.508809	0.86371
ENSMUSG00000097448	Gm16880	183.944	0.0230091	0.188018	0.419218	0.919792	70.6299	-0.0467402	0.412738	0.431791	0.826176
ENSMUSG00000096432	Gm22132	3.44371	-0.00475865	0.18811	0.277732		3.10266	-0.0228162	0.413657	0.304139
ENSMUSG00000104360	RP23-302C16.5	4.67361	-0.00479543	0.188114	0.238705		4.21075	-0.0230411	0.413704	0.262564
ENSMUSG00000026398	Nr5a2	2974.37	0.266671	0.376051	0.0331107	0.341345	2051.88	0.0611163	0.307218	0.774403	0.955012
ENSMUSG00000104118	RP23-393I12.1	8.17939	0.00506269	0.18812	0.1701
ENSMUSG00000026393	Nek7	980.11	-0.00652964	0.17982	0.896909	0.994764	1077.78	0.145521	0.369814	0.462059	0.838228
ENSMUSG00000099510	Gm28501	7.12492	0.00504838	0.188119	0.183715
ENSMUSG00000019230	Lhx9	3.93567	-0.00477609	0.188112	0.260155		9.57033	0.00672489	0.411285	0.867856
ENSMUSG00000079283	2310009B15Rik	6.53118	0.00503316	0.188118	0.192579
ENSMUSG00000065275	n-R5s217	6.9041	0.00412709	0.188028	0.501927		6.44177	0.0194851	0.41281	0.493866
ENSMUSG00000056268	Dennd1b	473.678	0.0145946	0.183769	0.735701	0.989985	514.679	0.112925	0.400846	0.45613	0.834911
ENSMUSG00000063681	Crb1	196.164	0.010269	0.187121	0.655313	0.978449	291.688	0.249167	0.491631	0.101374	0.436674
ENSMUSG00000033964	Zbtb41	5828.16	0.0573251	0.167286	0.514472	0.945553	5086.74	0.0672594	0.272871	0.742987	0.947729
ENSMUSG00000033952	Aspm	6467.55	0.17073	0.217879	0.111671	0.59895	4637.95	-0.080389	0.311409	0.697748	0.937737
ENSMUSG00000026368	F13b	60.2535	-0.00150399	0.187547	0.89935	0.995173	56.4595	-0.00305518	0.408252	0.94687	0.989513
ENSMUSG00000033898	Cfhr2	7.06932	-0.00332346	0.187987	0.593636		5.367	-0.0231537	0.413731	0.232395
ENSMUSG00000089991	Gm16332	222.558	-0.0243734	0.188113	0.397681	0.912918	132.362	-0.191579	0.483799	2.99437e-06	0.000341629
ENSMUSG00000104496	RP23-13N24.1	321.79	-0.0376135	0.189892	0.297482	0.853584	192.897	-0.27066	0.56315	4.00701e-05	0.00304455
ENSMUSG00000085867	Gm5834	42.0804	-0.00255745	0.187494	0.850213	0.993659	21.8674	-0.031195	0.414565	0.0661842
ENSMUSG00000026365	Cfh	45.3975	0.0084371	0.187836	0.552821	0.955798	32.0917	0.0184088	0.409667	0.754522	0.949536
ENSMUSG00000093879	Gm25457	3.13639	0.00186666	0.187903	0.806359		7.6628	0.0188373	0.412684	0.525251
ENSMUSG00000026361	Cdc73	1597.67	-0.0334319	0.178564	0.603817	0.968553	1670.1	0.0842	0.31931	0.687029	0.933248
ENSMUSG00000033849	B3galt2	70.8505	0.00350439	0.187516	0.822114	0.992863	51.3051	0.000532015	0.408644	0.993738	0.99909
ENSMUSG00000089640	Gm6397	80.8682	0.00666862	0.187124	0.749461	0.989985	52.0147	-0.0116201	0.406386	0.864113	0.976089
ENSMUSG00000018196	Glrx2	384.613	0.0138873	0.184998	0.712467	0.988042	276.105	-0.0353446	0.389535	0.784457	0.956869
ENSMUSG00000018199	Trove2	453.725	-0.022591	0.18585	0.552857	0.955798	439.875	-0.0406516	0.380521	0.783358	0.956869
ENSMUSG00000018189	Uchl5	503.318	-0.00721134	0.183501	0.851904	0.993659	503.718	0.0250372	0.382479	0.871814	0.977688
ENSMUSG00000100455	Gm29170	260.412	-0.00102098	0.185601	0.964774	0.998605	178.265	-0.0817391	0.407454	0.464953	0.840099
ENSMUSG00000026360	Rgs2	1281.52	1.92276	0.534907	1.34352e-05	0.00328905	904.373	1.12583	0.813692	0.00832608	0.113424
ENSMUSG00000026357	Rgs18	17.2186	-0.00487229	0.188121	0.115665		15.5133	-0.02347	0.413802	0.129706
ENSMUSG00000099964	Gm29514	28.9063	0.0101153	0.188315	0.235284	0.796852	8.56832	0.0130489	0.41184	0.714144
ENSMUSG00000090323	Gm5263	19.5544	-0.00305808	0.187783	0.759655		31.2689	0.0163351	0.409121	0.79267	0.958704
ENSMUSG00000035131	Brinp3	91.2647	-0.00681768	0.187399	0.689694	0.982975	128.5	0.0189433	0.406977	0.806864	0.963407
ENSMUSG00000080078	Gm15583	778.039	-0.0159361	0.180671	0.75778	0.989985	936.064	0.203507	0.385554	0.327067	0.753525
ENSMUSG00000087627	A230059L01Rik	23.5284	-0.00567874	0.188155	0.0741277		21.0704	-0.0235105	0.413812	0.107866
ENSMUSG00000104036	RP24-150D10.2	16.6306	-0.0054621	0.188145	0.0999075		14.9787	-0.0234502	0.413799	0.13241
ENSMUSG00000032487	Ptgs2	27.9821	0.00696716	0.188213	0.0459017	0.39297
ENSMUSG00000099875	Gm15453	5.18112	0.000728621	0.187872	0.927891		3.79571	-0.000697017	0.411151	0.976476
ENSMUSG00000100690	Gm4322	16.3588	0.00517498	0.188127	0.113752
ENSMUSG00000006010	BC003331	588.27	0.0132829	0.182165	0.786567	0.991121	481.808	-0.0124911	0.372954	0.932903	0.986921
ENSMUSG00000006005	Tpr	25371.9	0.0261898	0.145618	0.779054	0.990294	18379.1	-0.492988	0.26878	0.0232033	0.201492
ENSMUSG00000006014	Prg4	125.628	-0.0110014	0.187775	0.510736	0.943708	123.208	-0.0594729	0.405153	0.558255	0.886498
ENSMUSG00000066842	Hmcn1	61.9726	0.0162049	0.18863	0.261676	0.818776	47.5074	0.0547971	0.41407	0.385608	0.799916
ENSMUSG00000114212		36.5907	0.00740885	0.188019	0.474275	0.937154	42.1095	0.0555091	0.415528	0.311429	0.738092
ENSMUSG00000114943		128.915	0.00957313	0.187666	0.581103	0.962137	141.026	0.0569276	0.411905	0.461821	0.838093
ENSMUSG00000114694		83.442	-0.000556868	0.187399	0.960128	0.998605	49.7783	-0.0348792	0.411879	0.506013	0.863105
ENSMUSG00000114582		62.4725	0.00883629	0.187822	0.550476	0.955798	22.6813	-0.0126591	0.410962	0.759662
ENSMUSG00000114591		171.05	0.0230245	0.188361	0.382054	0.905338	58.7471	-0.0640712	0.415667	0.321009	0.747687
ENSMUSG00000100954	Gm10138	51.2541	-0.0132691	0.188252	0.350405	0.884538	37.7958	-0.0560038	0.418061	0.0768205	0.370656
ENSMUSG00000023150	Ivns1abp	2050.94	0.0196544	0.176786	0.761316	0.989985	1400.15	-0.288647	0.410541	0.196867	0.609447
ENSMUSG00000052748	Swt1	3767.92	-0.158442	0.232705	0.110192	0.597215	3955.2	-0.0217023	0.282127	0.910529	0.983344
ENSMUSG00000053286	Trmt1l	360.039	-0.00476392	0.184785	0.883689	0.994267	283.271	-0.0621786	0.39604	0.624078	0.914205
ENSMUSG00000103928	RP24-167M10.4	21.4087	-0.00019384	0.187836	0.968624		10.1945	-0.0233933	0.413783	0.165051
ENSMUSG00000026484	Rnf2	10146.2	0.0166518	0.150898	0.920742	0.995246	10436.4	0.281108	0.25121	0.161596	0.557042
ENSMUSG00000103238	RP24-395F2.1	189.491	0.0329691	0.19141	0.114019	0.605937	82.8356	0.0295948	0.408017	0.693405	0.936145
ENSMUSG00000100981	Gm29072	42.8394	-0.00925546	0.188368	0.0144221	0.24647	38.3641	-0.0362753	0.415197	0.0303814	0.226058
ENSMUSG00000026483	Fam129a	118.21	-0.0176678	0.188778	0.234307	0.796055	173.152	-0.00404683	0.396452	0.961653	0.992487
ENSMUSG00000043019	Edem3	781.671	-0.0500408	0.188712	0.357622	0.886887	745.201	-0.0937419	0.365068	0.606758	0.907806
ENSMUSG00000032666	1700025G04Rik	490.078	-0.0398591	0.188671	0.362009	0.889771	569.58	0.0297229	0.365464	0.866746	0.97715
ENSMUSG00000014980	Tsen15	36.2183	0.00845775	0.188305	0.02294	0.29751
ENSMUSG00000032649	Colgalt2	1014.47	-1.55213	0.681497	0.00061044	0.0453887	809.719	-0.0386023	0.414152	0.322512	0.748931
ENSMUSG00000026482	Rgl1	367.169	0.0344978	0.189851	0.296828	0.853507	200.3	-0.0162392	0.392781	0.886308	0.980945
ENSMUSG00000080950	Gm7278	17.0038	-0.00423107	0.187904	0.630967		12.1216	-0.0215869	0.413391	0.322671
ENSMUSG00000055547	Apobec4	30.9934	-0.00712582	0.188229	0.0382918	0.36251	62.9914	0.00703294	0.409198	0.914678	0.984095
ENSMUSG00000008475	Arpc5	304.777	0.0430627	0.192499	0.195904	0.752867	93.4408	-0.10467	0.426326	0.17222	0.57298
ENSMUSG00000026480	Ncf2	9.99308	-0.00248538	0.187934	0.714252		56.8873	0.0510484	0.415381	0.298836	0.728574
ENSMUSG00000042772	Smg7	4859.31	0.0310534	0.165773	0.698253	0.985341	3465.81	-0.362563	0.342941	0.125373	0.488792
ENSMUSG00000100394	Gm28791	10.7624	0.00511358	0.188123	0.145687
ENSMUSG00000042751	Nmnat2	545.246	0.0254618	0.185818	0.5425	0.953202	450.09	0.0549282	0.377291	0.73983	0.946923
ENSMUSG00000026479	Lamc2	308.865	-0.0170377	0.187469	0.49549	0.941561	221.955	-0.102017	0.423828	0.215843	0.637007
ENSMUSG00000026478	Lamc1	3059.7	-0.0622633	0.184215	0.38224	0.905338	3117.31	0.00981498	0.283723	0.969569	0.994362
ENSMUSG00000103818	RP24-571N3.1	50.8372	-0.00777013	0.188099	0.387222	0.907518	48.06	-0.0276734	0.412258	0.513607	0.866735
ENSMUSG00000042708	Shcbp1l	173.084	-0.0153024	0.187897	0.446241	0.928849	212.074	-0.00808845	0.391784	0.93985	0.988466
ENSMUSG00000042699	Dhx9	5862.06	0.588599	0.343095	0.00464608	0.135838	2899.06	-0.664133	0.40091	0.0176082	0.173775
ENSMUSG00000042684	Npl	670.23	-0.00435636	0.181816	0.916547	0.995246	435.296	-0.266675	0.478683	0.138821	0.513391
ENSMUSG00000099858	Gm6652	8.06556	-0.00351245	0.188001	0.560893		8.87419	-0.00936375	0.411563	0.779784
ENSMUSG00000102404	RP23-184B11.5	63.0182	-0.000114465	0.187497	0.981103	0.999351	53.8564	-0.00516956	0.406618	0.930559	0.986921
ENSMUSG00000100334	C230024C17Rik	12.779	0.00489051	0.188081	0.354046		64.857	0.0612003	0.419394	0.0244178	0.20608
ENSMUSG00000026475	Rgs16	495.552	0.0102984	0.186738	0.693745	0.984225	195.623	-0.224266	0.503079	0.0115287	0.136854
ENSMUSG00000066800	Rnasel	5.59643	0.00500615	0.188117	0.208775
ENSMUSG00000045968	Teddm2	115.731	0.0155901	0.187701	0.49136	0.940602	216.689	0.250095	0.511527	0.0479074	0.287672
ENSMUSG00000043282	Teddm1b	19.7978	0.00453945	0.187973	0.575313		27.4539	0.0324867	0.413424	0.402409
ENSMUSG00000026473	Glul	5354.93	0.158057	0.229278	0.115865	0.609349	2752.28	-0.886593	0.606484	0.011489	0.136506
ENSMUSG00000100014	Gm29290	358.462	-0.0602395	0.201752	0.00939307	0.204041	359.994	-0.165083	0.446457	0.14013	0.515495
ENSMUSG00000100627	A830008E24Rik	10.301	0.00367853	0.187996	0.574742
ENSMUSG00000066797	Zfp648	20.7459	0.00690888	0.188041	0.456553		10.1792	0.0107621	0.411589	0.774351
ENSMUSG00000004110	Cacna1e	18.788	0.00554622	0.188124	0.235238
ENSMUSG00000096950	Gm9530	43.2924	-0.00929394	0.188371	0.0140887	0.245076	39.0049	-0.0366343	0.415245	0.0292397	0.221782
ENSMUSG00000056708	Ier5	912.587	0.115813	0.233053	0.0460915	0.393958	317.324	-0.101001	0.420169	0.281665	0.710978
ENSMUSG00000026471	Mr1	4.88325	-0.00480136	0.188114	0.233321		4.37311	-0.0230567	0.413708	0.257572
ENSMUSG00000026470	Stx6	1014.84	-0.0243788	0.179886	0.672987	0.981835	1051.22	0.0397786	0.369532	0.819856	0.96556
ENSMUSG00000033722	BC034090	205.029	-0.00434055	0.186053	0.866284	0.994267	173.163	-0.0365437	0.395688	0.75218	0.948903
ENSMUSG00000026469	Xpr1	4385.9	0.0505906	0.167916	0.542315	0.953202	3395.08	-0.131455	0.291091	0.529212	0.873641
ENSMUSG00000073535	Gm5532	36.891	0.00700416	0.187957	0.524032	0.949854	7.0918	-0.023279	0.413757	0.201104
ENSMUSG00000033701	Acbd6	751.808	-0.0315282	0.184451	0.525677	0.950451	939.875	0.163386	0.375292	0.414952	0.816926
ENSMUSG00000033684	Qsox1	384.717	0.0190621	0.186762	0.550503	0.955798	391.972	0.138862	0.412489	0.3568	0.780023
ENSMUSG00000033671	Cep350	5650.94	0.0272532	0.159727	0.755342	0.989985	5437.79	0.177265	0.268804	0.396265	0.806425
ENSMUSG00000102833	RP24-310B3.1	49.6264	-0.0114602	0.188536	0.031114	0.333656	44.3237	-0.0405524	0.415795	0.0200257	0.185788
ENSMUSG00000026466	Tor1aip1	803.951	-0.0150933	0.181235	0.763266	0.989985	555.808	-0.20961	0.443857	0.202394	0.61705
ENSMUSG00000102964	RP24-321N12.1	111.7	-0.0376452	0.193701	6.5579e-05	0.0106989	99.7531	-0.143354	0.451358	3.11913e-05	0.00248758
ENSMUSG00000050565	Tor1aip2	1128.61	-0.0636857	0.193695	0.261746	0.818776	710.87	-2.25818	0.883008	0.000367692	0.0161436
ENSMUSG00000015484	Fam163a	4.63143	-0.0047946	0.188114	0.239733		4.15828	-0.0230318	0.413702	0.264108
ENSMUSG00000060985	Tdrd5	526.304	-0.0123336	0.182919	0.776399	0.989985	502.548	-0.0034703	0.372736	0.975561	0.995935
ENSMUSG00000026602	Nphs2	11.0983	-0.00485663	0.18812	0.149723		9.93889	-0.0233876	0.413781	0.16736
ENSMUSG00000026601	Axdnd1	283.416	-0.0282867	0.1888	0.341247	0.877567	383.568	0.0522399	0.379685	0.744982	0.947902
ENSMUSG00000078193	Gm2000	138.018	0.0175191	0.18804	0.426737	0.921878	91.8319	0.0244072	0.405132	0.77986	0.956426
ENSMUSG00000026600	Soat1	611.979	-0.0113515	0.182586	0.797092	0.991289	814.805	0.223989	0.422004	0.252441	0.682466
ENSMUSG00000101523	Csnk2a1	963.857	0.00359969	0.178008	0.954796	0.998605	908.141	0.0469302	0.351966	0.801499	0.961436
ENSMUSG00000026596	Abl2	35931.2	0.0226093	0.147521	0.809265	0.991606	39277.5	0.441248	0.268683	0.0416356	0.2672
ENSMUSG00000104293	RP23-363M8.2	92.2732	0.00419626	0.187524	0.791659	0.991121	79.5649	0.0139999	0.408092	0.841803	0.970389
ENSMUSG00000060519	Tor3a	157.553	0.00653733	0.186726	0.790715	0.991121	160.555	0.0397044	0.40446	0.680882	0.930518
ENSMUSG00000033557	Fam20b	352.823	-0.0350024	0.191231	0.174665	0.721399	293.294	-0.150212	0.442168	0.129633	0.497702
ENSMUSG00000026594	Ralgps2	15080.6	0.0241574	0.14861	0.79646	0.991271	15442.7	0.306253	0.247037	0.126819	0.49257
ENSMUSG00000101964	Gm28693	3.44396	0.00490457	0.18811	0.267131		8.60873	0.0245395	0.413813	0.155924
ENSMUSG00000033544	Angptl1	26.6852	-0.00890577	0.188341	0.026144	0.316044	27.187	-0.0315406	0.413316	0.400479
ENSMUSG00000101905	4930439D14Rik	33.6248	-0.00276099	0.187825	0.76072	0.989985	20.4741	-0.0235326	0.413813	0.109779
ENSMUSG00000101768	Gm28694	26.6359	-0.00629469	0.188185	0.0558091	0.425313	28.539	-0.0203098	0.412299	0.555169
ENSMUSG00000026592	Tex35	23.0835	-0.0047756	0.187939	0.579587		62.685	0.0536248	0.411543	0.477375	0.847849
ENSMUSG00000070565	Rasal2	824.367	-0.157748	0.283551	0.0194514	0.281292	1156.5	0.0790148	0.336746	0.697598	0.937737
ENSMUSG00000102391	RP24-227F14.4	12.5619	0.00435057	0.188049	0.441204
ENSMUSG00000103808	RP24-227F14.1	84.8995	-0.00565267	0.187767	0.639139	0.976337	95.7828	-0.00822825	0.407362	0.888598	0.981319
ENSMUSG00000049881	2810025M15Rik	427.927	0.0423684	0.19146	0.251705	0.810208	302.234	0.0644373	0.392527	0.647609	0.921578
ENSMUSG00000033488	BC026585	164.693	0.0139899	0.1875	0.539468	0.953202	50.7723	-0.0706816	0.421907	0.00295784	0.0626216
ENSMUSG00000087093	Gm15486	133.672	0.0123965	0.187949	0.467426	0.935693	77.894	0.0145281	0.407414	0.844649	0.971296
ENSMUSG00000026589	Sec16b	686.454	-0.0550408	0.193577	0.235264	0.796852	1064.95	0.28642	0.41722	0.20052	0.614732
ENSMUSG00000004031	Brinp2	14.7978	-0.00325845	0.187982	0.60301		11.1316	-0.0234197	0.413788	0.157065
ENSMUSG00000026587	Astn1	35.9625	-0.00738423	0.188035	0.445181	0.928357	79.8756	0.0266024	0.409038	0.694841	0.936698
ENSMUSG00000102618	RP23-411L6.3	5.41155	-0.00480965	0.188115	0.221432		5.78645	-0.0156554	0.412332	0.604469
ENSMUSG00000073530	Pappa2	8.67087	-0.00336648	0.18799	0.587152		10.2919	-0.00632026	0.411319	0.850749
ENSMUSG00000040782	Rfwd2	25351.5	0.000238753	0.146839	0.999148	0.99948	24543.4	0.143767	0.229884	0.434857	0.827457
ENSMUSG00000103572	RP23-375F6.4	76.9013	-0.00659909	0.187662	0.639538	0.976337	83.117	-0.010086	0.40705	0.871751	0.977688
ENSMUSG00000103186	RP23-145H3.4	7.7489	0.0050459	0.188119	0.175254		9.37134	0.0246013	0.413821	0.148572
ENSMUSG00000089536	Scarna3a	2.66359	-0.00472337	0.188106	0.313555		2.38533	-0.0225071	0.413602	0.343026
ENSMUSG00000015829	Tnr	23.0845	-0.0055674	0.18815	0.0772441		20.6729	-0.023526	0.413813	0.109133
ENSMUSG00000026725	Tnn	607.696	-0.102645	0.226274	0.0251343	0.309947	797.354	-0.0338618	0.357937	0.845882	0.971476
ENSMUSG00000058267	Mrps14	1571.27	0.0257318	0.176969	0.68583	0.982354	1900.87	0.531691	0.464181	0.0546904	0.306428
ENSMUSG00000014226	Cacybp	1476.98	0.028516	0.181523	0.616389	0.971707	845.477	-0.568637	0.638664	0.0446036	0.276962
ENSMUSG00000103006	RP23-71J17.5	73.9619	-0.0116321	0.188437	0.188174	0.742445	114.774	-0.00352272	0.407791	0.941236	0.988856
ENSMUSG00000026721	Rabgap1l	2071.58	0.0252207	0.175849	0.709733	0.987738	2135.78	0.236394	0.36094	0.286142	0.716701
ENSMUSG00000103432	RP24-546N2.2	7.80988	-0.00429616	0.188065	0.385967		6.64856	-0.023256	0.413752	0.208081
ENSMUSG00000040423	Rc3h1	8046.21	0.0407172	0.156902	0.662558	0.98002	7264.19	0.0824357	0.249077	0.673769	0.929607
ENSMUSG00000103343	RP24-188H2.3	5.16593	0.00499063	0.188116	0.217695
ENSMUSG00000103846	RP24-188H2.4	9.47088	0.00508295	0.188122	0.1567
ENSMUSG00000103739	RP24-188H2.5	17.7117	0.00525375	0.188111	0.254073
ENSMUSG00000026715	Serpinc1	856.212	0.0480455	0.189618	0.339058	0.876949	457.85	-0.172705	0.418291	0.294888	0.725039
ENSMUSG00000043467	Zbtb37	3619.1	-0.141876	0.229971	0.112351	0.600876	4026.51	0.0351963	0.297189	0.869707	0.977688
ENSMUSG00000053332	Gas5	1350.63	0.0725255	0.193754	0.27233	0.833436	876.734	-0.0834597	0.371132	0.630114	0.915641
ENSMUSG00000026709	Dars2	300.939	-0.0370571	0.190282	0.274697	0.834482	213.604	-0.115887	0.430665	0.140526	0.516548
ENSMUSG00000026708	Cenpl	960.591	0.14935	0.266913	0.0330606	0.341345	415.462	-0.122369	0.402674	0.415912	0.818033
ENSMUSG00000026705	Klhl20	255.207	-0.0319923	0.189172	0.325028	0.870402	250.306	-0.074995	0.397638	0.565622	0.889002
ENSMUSG00000044835	Ankrd45	95.7791	-0.00609757	0.187522	0.692209	0.984092	55.5923	-0.074662	0.422975	0.00208737	0.0510318
ENSMUSG00000102817	RP23-16I21.1	35.1667	-0.0103633	0.188453	0.0128083	0.235999	31.4983	-0.0404492	0.415769	0.0282373	0.21773
ENSMUSG00000026701	Prdx6	484.156	-0.00347298	0.184248	0.918318	0.995246	483.59	0.019082	0.394367	0.87691	0.978321
ENSMUSG00000040323	Gm15429	130.51	-0.000399861	0.186619	0.976822	0.999351	158.922	0.060175	0.402536	0.598258	0.90338
ENSMUSG00000102399	RP24-75E15.1	472.522	0.00753271	0.184108	0.851038	0.993659	406.045	0.00709491	0.382233	0.968311	0.993662
ENSMUSG00000103625	RP24-75E15.5	3.05377	0.00068377	0.187874	0.935557		2.55893	0.00186264	0.411176	0.96497
ENSMUSG00000040297	Suco	5959.18	0.140278	0.212095	0.154372	0.692432	4422.8	-0.0361053	0.266295	0.856195	0.97406
ENSMUSG00000103158	RP24-75E15.3	86.6441	5.36497e-05	0.187161	0.991204	0.999472	99.2825	0.0279335	0.405263	0.750467	0.948456
ENSMUSG00000026698	Pigc	301.168	-0.0411095	0.191818	0.211262	0.770332	315.716	-0.0772316	0.395361	0.573792	0.893007
ENSMUSG00000103393	RP24-499I2.1	26.5364	0.00327209	0.187885	0.722024	0.989515	6.64856	-0.023256	0.413752	0.208081
ENSMUSG00000040265	Dnm3	371.491	-0.0435288	0.19268	0.185434	0.738745	527.486	0.0420283	0.382031	0.770244	0.953965
ENSMUSG00000078190	Dnm3os	18.406	0.00519059	0.188128	0.105895
ENSMUSG00000026694	Mettl13	575.393	-0.0439923	0.189299	0.340727	0.87735	396.27	-0.503297	0.836464	0.0252689	0.208619
ENSMUSG00000026696	Vamp4	1351.09	1.16827	0.579926	0.00134809	0.073082	1192.06	1.07018	0.636884	0.00633326	0.0971112
ENSMUSG00000091743	Gm5705	86.1738	0.00312109	0.187028	0.883717	0.994267	103.926	0.0521358	0.40702	0.578644	0.894547
ENSMUSG00000026697	Myoc	7.10291	-0.00483138	0.188117	0.191752		6.5886	-0.021583	0.413391	0.335398
ENSMUSG00000091060	7420461P10Rik	236.053	0.0124985	0.18585	0.701972	0.986161	247.918	0.0948041	0.402594	0.487344	0.853676
ENSMUSG00000040225	Prrc2c	25727.2	-0.0243217	0.149912	0.798329	0.991289	20145.7	-0.385865	0.253584	0.0619851	0.328414
ENSMUSG00000026692	Fmo4	541.217	-0.00653042	0.182924	0.872372	0.994267	626.876	0.113489	0.387838	0.505159	0.863091
ENSMUSG00000040170	Fmo2	17.2198	0.00518192	0.188127	0.110253		19.6535	0.0284404	0.414202	0.0764115
ENSMUSG00000095576	Fmo6	43.9025	-0.0145202	0.188864	0.00321578	0.11522	41.4205	-0.0545461	0.417343	0.137067	0.511652
ENSMUSG00000026691	Fmo3	77.328	-0.00382996	0.18716	0.828201	0.992863	113.17	0.0435678	0.406655	0.62722	0.914814
ENSMUSG00000040124	Gorab	123.957	0.0210217	0.188369	0.376465	0.900317	32.928	-0.0463895	0.416702	0.0191966	0.18188
ENSMUSG00000026585	Kifap3	11.8453	0.00493885	0.188105	0.237029		7.56198	0.0231498	0.413516	0.281909
ENSMUSG00000026584	Scyl3	117.923	-0.00880722	0.187645	0.582509	0.962769	215.032	0.0595321	0.40714	0.548325	0.883699
ENSMUSG00000041406	BC055324	272.541	0.0225868	0.187857	0.436618	0.924536	84.5256	-0.115146	0.437348	0.000140602	0.0077776
ENSMUSG00000041396	Mettl18	74.2402	-0.00489191	0.187543	0.731675	0.989914	100.007	0.0261961	0.402302	0.792802	0.958704
ENSMUSG00000026580	Selp	128.517	-0.0133042	0.187602	0.516514	0.947453	136.454	-0.0274647	0.39967	0.784768	0.956869
ENSMUSG00000086593	Gm16548	5.77111	-0.00481467	0.188116	0.214053		5.16822	-0.0231296	0.413726	0.236897
ENSMUSG00000026579	F5	302.724	0.0183352	0.185864	0.611002	0.97051	234.871	0.00985534	0.397281	0.941174	0.988856
ENSMUSG00000040918	Slc19a2	548.024	-0.0179086	0.185802	0.606584	0.969736	427.545	-0.187232	0.428205	0.252836	0.682635
ENSMUSG00000026578	Ccdc181	1390.05	0.131136	0.23573	0.0851199	0.518057	1212.75	0.231362	0.412026	0.25443	0.684513
ENSMUSG00000026577	Blzf1	687.361	-0.0681936	0.198103	0.189536	0.74572	789.909	-0.00275948	0.358155	0.981496	0.996723
ENSMUSG00000026575	Nme7	176.007	-0.0103663	0.186543	0.689322	0.982942	228.185	0.055994	0.39641	0.662878	0.92643
ENSMUSG00000026576	Atp1b1	1475.62	0.0153072	0.181314	0.772963	0.989985	1200.68	-0.0204564	0.361645	0.900754	0.982079
ENSMUSG00000026572	Tbx19	996.726	-0.0699316	0.196619	0.224238	0.785837	1038.09	-0.0651095	0.34321	0.733685	0.945441
ENSMUSG00000040848	Sft2d2	78.4631	0.0158912	0.18819	0.39573	0.911915	145.027	0.0893793	0.423179	0.176845	0.580336
ENSMUSG00000040843	Tiprl	2288.5	-0.0291302	0.179764	0.616116	0.971707	1335.9	-2.09585	0.59098	1.89707e-05	0.00167565
ENSMUSG00000102302	RP23-187M7.5	231.514	-0.00268035	0.186005	0.913859	0.995246	157.121	-0.0568843	0.408858	0.512292	0.865889
ENSMUSG00000040836	Gpr161	1278.92	-0.0461276	0.187277	0.391241	0.910132	856.966	-1.27082	0.876378	0.00594753	0.0935043
ENSMUSG00000026571	Dcaf6	3445.17	0.103356	0.19678	0.230893	0.791013	3078.31	0.2333	0.315852	0.292836	0.722412
ENSMUSG00000102401	RP24-323I23.1	14.6497	-0.00486432	0.188121	0.12739		47.7314	0.021142	0.411008	0.674763	0.929746
ENSMUSG00000026568	Mpc2	875.299	0.0422298	0.188022	0.388822	0.908476	492.26	-0.131736	0.404734	0.392893	0.803841
ENSMUSG00000103763	RP24-323I23.2	23.3943	1.49633e-05	0.18782	0.986172		31.4848	0.0115296	0.410868	0.805999	0.963107
ENSMUSG00000026567	Adcy10	40.3303	0.0062105	0.18787	0.595793	0.965749	52.509	0.044472	0.41343	0.414842	0.816926
ENSMUSG00000026566	Mpzl1	810.406	0.0169525	0.180899	0.752024	0.989985	606.751	-0.0671789	0.37601	0.679198	0.930518
ENSMUSG00000104517	RP23-469D21.6	14.7588	-0.00486955	0.188121	0.126855		21.9991	-0.00458527	0.411081	0.889502
ENSMUSG00000040723	Rcsd1	58.2044	0.00901076	0.188036	0.453317	0.930519	19.476	-0.00223554	0.410262	0.948068
ENSMUSG00000040713	Creg1	92.2532	0.00392325	0.187001	0.856674	0.994267	131.418	0.046564	0.41045	0.532897	0.875406
ENSMUSG00000005763	Cd247	68.1252	0.0129645	0.188633	0.0805881	0.505865	83.7348	0.0947403	0.428487	0.0210245	0.19094
ENSMUSG00000094394	Gm23402	9.59332	-0.00305816	0.187969	0.6349		7.31951	-0.0217898	0.413433	0.319205
ENSMUSG00000026565	Pou2f1	1662.77	-0.0506455	0.183765	0.436029	0.924536	1292.25	-0.438835	0.472174	0.0870729	0.399141
ENSMUSG00000097196	Gm26665	6.52567	0.00232328	0.187918	0.758572
ENSMUSG00000026564	Dusp27	33.2496	0.00791347	0.188269	0.0294811	0.327309
ENSMUSG00000000544	Gpa33	93.6637	-0.00639607	0.187104	0.742851	0.989985	101.074	0.0017584	0.405978	0.993613	0.99909
ENSMUSG00000040629	Mael	2524.7	0.125447	0.215595	0.16328	0.706609	2208.39	0.226075	0.342554	0.310747	0.737222
ENSMUSG00000040612	Ildr2	27.9924	-0.00935479	0.188374	0.0220808	0.293603	39.6923	-0.0132594	0.409533	0.796078	0.959318
ENSMUSG00000103400	RP24-229G16.1	61.7389	-0.00168963	0.187561	0.887908	0.994267	32.7173	-0.0417381	0.415418	0.172184	0.57298
ENSMUSG00000026563	Tada1	241.282	0.0116515	0.18556	0.730677	0.989914	189.012	0.000136915	0.396365	0.991889	0.998896
ENSMUSG00000040596	Pogk	264.014	0.00982099	0.185215	0.779125	0.990294	274.01	0.0745545	0.397947	0.57829	0.894547
ENSMUSG00000104194	RP24-229G16.2	9.01998	-0.00199743	0.187911	0.774905		17.6055	0.00905508	0.411415	0.820331
ENSMUSG00000096172	Gm22992	4.60181	0.00251059	0.187929	0.733346
ENSMUSG00000051081	Gm4847	42.8225	-0.0141396	0.188821	0.00367969	0.121005	40.4426	-0.0532252	0.417085	0.144704	0.523576
ENSMUSG00000086925	Gm6286	8.00049	0.00485989	0.188096	0.288749
ENSMUSG00000097823	Gm16701	4.52019	0.00496404	0.188114	0.233185
ENSMUSG00000060568	Fam78b	76.3565	-0.00906241	0.187384	0.629916	0.973579	106.842	0.0283979	0.403085	0.771843	0.954145
ENSMUSG00000026558	Uck2	5650.38	-0.0186733	0.163466	0.816732	0.992096	4297.45	-0.392458	0.340156	0.0957672	0.422378
ENSMUSG00000103139	RP23-79H24.3	19.9369	-0.00072915	0.18785	0.915288		10.3364	-0.0233947	0.413783	0.163741
ENSMUSG00000102909	RP23-79H24.4	11.561	-0.00485835	0.18812	0.146295		10.4161	-0.0233965	0.413784	0.163079
ENSMUSG00000052428	Tmco1	1361.66	0.0193935	0.178758	0.746461	0.989985	1002.03	-0.144768	0.359724	0.468564	0.842149
ENSMUSG00000088246	Gm25911	3197.63	1.07458	0.4645	0.000798931	0.0534469	2460.21	0.712946	0.456936	0.0170517	0.170325
ENSMUSG00000026687	Aldh9a1	5778.38	0.0602244	0.171043	0.514359	0.945449	4414.74	-0.152394	0.285898	0.466795	0.841025
ENSMUSG00000026688	Mgst3	1228.97	0.0246724	0.17846	0.692133	0.984092	1824.42	0.628263	0.698723	0.0366161	0.249643
ENSMUSG00000040485	Lrrc52	35.5039	0.00993298	0.188317	0.219665	0.780187	17.0036	0.0208479	0.412653	0.525743
ENSMUSG00000026686	Lmx1a	995.18	-0.0184641	0.184988	0.633215	0.974738	521.467	-4.94366	1.18013	8.16969e-07	0.000107376
ENSMUSG00000052534	Pbx1	26.7444	0.00649843	0.18813	0.318464	0.865174	2.95649	-0.00140019	0.41117	0.963843
ENSMUSG00000058622	Gm5265	2.36772	0.00480735	0.188103	0.3193
ENSMUSG00000026683	Nuf2	5229.11	0.0103915	0.160239	0.904833	0.995192	6781.98	0.730382	0.372126	0.00851746	0.114699
ENSMUSG00000038530	Rgs4	8.87864	-0.00484533	0.188119	0.169758		7.95111	-0.0233212	0.413766	0.189107
ENSMUSG00000026675	Hsd17b7	469.601	0.0779586	0.210982	0.0114216	0.224922	427.193	0.457268	0.830055	0.015012	0.15922
ENSMUSG00000097503	3110045C21Rik	33.8909	0.00173441	0.187697	0.893211	0.994412	43.1909	0.0220214	0.410396	0.69231	0.935681
ENSMUSG00000026674	Ddr2	2454.8	0.0992835	0.199128	0.223506	0.784417	1530.3	-0.268123	0.376468	0.23242	0.660743
ENSMUSG00000026670	Uap1	1715.98	0.00664062	0.176881	0.917101	0.995246	1172.25	-0.280809	0.436362	0.183648	0.590904
ENSMUSG00000104266	RP23-124N16.3	5.65789	0.00415308	0.188037	0.467468
ENSMUSG00000026667	Uhmk1	17841.3	-0.0858912	0.167595	0.346326	0.880591	18257.1	0.0993308	0.226611	0.601056	0.905145
ENSMUSG00000044306	4930500M09Rik	3.44396	0.00490457	0.18811	0.267131
ENSMUSG00000073494	Sh2d1b2	6.45742	0.00502478	0.188118	0.193499
ENSMUSG00000096964	Gm6345	8.24086	0.00448103	0.188064	0.394168
ENSMUSG00000102752	Gm7694	1205.02	-0.141182	0.257154	0.0368055	0.355244	1785.58	0.156851	0.365144	0.443136	0.831843
ENSMUSG00000038473	Nos1ap	694.209	-0.0651229	0.197715	0.176204	0.724284	856.904	0.0374147	0.353082	0.850112	0.972122
ENSMUSG00000102193	RP24-212P5.2	6.17451	0.00281833	0.187943	0.696868		47.7604	0.0565796	0.418111	0.0800564	0.380604
ENSMUSG00000038463	Olfml2b	36.8884	-0.00106616	0.187758	0.902177	0.995173	19.0592	-0.0235427	0.413813	0.114685
ENSMUSG00000026663	Atf6	507.769	-0.0495929	0.192461	0.248623	0.808212	547.788	-0.0358935	0.382428	0.801241	0.961196
ENSMUSG00000026659	Dusp12	144.754	-0.0240614	0.18888	0.308871	0.860601	173.96	-0.0167741	0.397465	0.868979	0.977688
ENSMUSG00000096968	Gm26620	17.8897	-0.00609527	0.188174	0.0795596		32.448	0.00138775	0.409535	0.992208	0.998896
ENSMUSG00000070524	Fcrlb	2.67504	-0.00394357	0.188036	0.485264		2.88557	-0.0120756	0.411887	0.708825
ENSMUSG00000059089	Fcgr4	3.25711	0.000505985	0.187873	0.953998		7.25019	0.0155565	0.412175	0.639373
ENSMUSG00000065905	Gm26110	31.0098	0.00688123	0.18786	0.579405	0.961814	25.4993	0.0230553	0.410688	0.667499
ENSMUSG00000059498	Fcgr3	2896.62	0.0664608	0.179145	0.413436	0.918621	1527.66	-1.40321	0.537795	0.000556791	0.0217798
ENSMUSG00000099119	Mir6546	3.55145	-0.00476328	0.188111	0.273428		3.18044	-0.0228415	0.413662	0.30041
ENSMUSG00000098356	Gm27552	7.10291	-0.00483138	0.188117	0.191752		6.36089	-0.0232403	0.413748	0.212884
ENSMUSG00000098965	Gm27844	3.55145	-0.00476328	0.188111	0.273428		3.18044	-0.0228415	0.413662	0.30041
ENSMUSG00000026649	1700009P17Rik	13.318	-0.00486425	0.188121	0.134743		11.9267	-0.0234341	0.413791	0.151038
ENSMUSG00000058076	Sdhc	271.821	0.0350756	0.189993	0.290002	0.845639	199.635	0.0545725	0.400336	0.64285	0.919715
ENSMUSG00000038370	Pcp4l1	105.284	-0.0346494	0.192808	0.000253677	0.0263934	93.9446	-0.149859	0.454919	0.000265527	0.0127554
ENSMUSG00000013593	Ndufs2	141.906	-0.00857433	0.187488	0.622881	0.972654	84.3082	-0.130481	0.444256	0.000973223	0.0315718
ENSMUSG00000006403	Adamts4	79.2511	-0.0229692	0.189646	0.134108	0.653395	119.889	-0.00300266	0.403504	0.960892	0.9922
ENSMUSG00000052423	B4galt3	907.887	-0.0224586	0.183526	0.630666	0.973682	561.844	-0.453527	0.758195	0.0269579	0.213854
ENSMUSG00000062729	Ppox	5.92293	0.00501626	0.188117	0.202679
ENSMUSG00000053483	Usp21	3307.22	0.00883849	0.170594	0.906858	0.995192	2792.28	-0.0685433	0.289363	0.737915	0.94644
ENSMUSG00000062963	Ufc1	109.503	-0.0121249	0.187764	0.499595	0.942627	350.106	0.227954	0.485234	0.0860079	0.397363
ENSMUSG00000087747	Gm25151	22.8591	0.00586231	0.188157	0.0751715
ENSMUSG00000103983	RP23-395H6.2	21.8928	-0.00112027	0.187844	0.880923		36.6718	0.0182274	0.410222	0.739832	0.946923
ENSMUSG00000013973	Dedd	173.86	0.000551354	0.185836	0.992035	0.999472	128.037	-0.0377094	0.402684	0.694124	0.936166
ENSMUSG00000013997	Nit1	214.72	-0.0175143	0.186916	0.54409	0.953377	262.472	0.0318748	0.38957	0.818202	0.965262
ENSMUSG00000006412	Pfdn2	583.703	0.0389334	0.187554	0.409251	0.91829	378.773	-0.0485317	0.381318	0.743541	0.947729
ENSMUSG00000102929	RP23-191A19.1	40.7097	-0.0094984	0.188358	0.0952324	0.54986	51.4905	-0.0231502	0.410023	0.671288	0.928866
ENSMUSG00000006411	Pvrl4	8.26002	0.00187386	0.187898	0.815439		9.74853	0.0127412	0.411799	0.723739
ENSMUSG00000048865	Arhgap30	27.1211	0.00679097	0.188204	0.0496664	0.40287
ENSMUSG00000026641	Usf1	1300.31	0.0694295	0.195178	0.250957	0.809111	762.304	-0.155673	0.385175	0.40656	0.812059
ENSMUSG00000103711	Tstd1	14.5112	-0.00397669	0.187993	0.552874		11.113	-0.0234177	0.413788	0.157237
ENSMUSG00000038235	F11r	607.522	0.0302975	0.18505	0.527601	0.950797	407.809	-0.0588673	0.385358	0.688037	0.933848
ENSMUSG00000091993	B930036N10Rik	109.988	0.00533638	0.187055	0.801321	0.991606	70.4499	-0.018786	0.406352	0.79291	0.958704
ENSMUSG00000060244	Alyref2	27.7398	-0.00582071	0.187829	0.608086	0.969989	18.8995	-0.0293352	0.414034	0.235115
ENSMUSG00000038218	Gm9765	16.4255	-0.00487157	0.188121	0.118981		44.9951	0.0158087	0.410519	0.759546	0.950212
ENSMUSG00000038209	Itln1	16.4735	-0.00521594	0.188135	0.104394		38.1836	0.0114435	0.409865	0.838488	0.969334
ENSMUSG00000004709	Cd244	96.7344	-0.00153706	0.187552	0.895605	0.99447	138.811	0.0345542	0.407448	0.669265	0.92844
ENSMUSG00000038179	Slamf7	26.5409	-0.00983297	0.188399	0.0522346	0.412448	25.3004	-0.0336814	0.414167	0.282009
ENSMUSG00000103219	RP23-116M12.7	12.6467	-0.0044007	0.188075	0.349789		10.8593	-0.0234058	0.413786	0.159309
ENSMUSG00000103083	RP23-145F9.4	86.3771	-0.0283547	0.191244	3.64178e-05	0.00681482	120.65	-0.043458	0.405573	0.625705	0.914205
ENSMUSG00000103137	RP23-145F9.2	52.8432	0.0112424	0.188523	0.00631651	0.163548	7.3632	0.0244153	0.413796	0.170258
ENSMUSG00000103883	RP23-145F9.3	169.874	0.0070641	0.18635	0.796418	0.991271	143.226	0.0112046	0.401321	0.916579	0.984095
ENSMUSG00000059058	Tma7-ps	6.79612	-0.00111126	0.187882	0.874419		4.26183	-0.0179691	0.412709	0.519505
ENSMUSG00000015316	Slamf1	210.871	-0.0350034	0.191085	0.190048	0.745892	354.312	0.0673519	0.396282	0.616062	0.911783
ENSMUSG00000038147	Cd84	126.236	-0.0164661	0.187912	0.438574	0.925622	105.466	-0.0754483	0.414018	0.376623	0.794062
ENSMUSG00000015314	Slamf6	83.1864	0.000935069	0.187392	0.96379	0.998605	37.4626	-0.0363058	0.414791	0.185089	0.592755
ENSMUSG00000026556	Vangl2	37.0225	0.00869693	0.188321	0.0208172	0.28935
ENSMUSG00000003458	Ncstn	548.778	-0.00131418	0.182536	0.970197	0.999256	534.056	0.043194	0.368387	0.803953	0.962427
ENSMUSG00000026553	Copa	3342	-0.748452	0.422715	0.00295246	0.110012	4227.3	0.075594	0.2703	0.716034	0.941806
ENSMUSG00000003464	Pex19	792.642	0.0363124	0.186634	0.439302	0.926324	966.39	0.421173	0.566071	0.0787306	0.376335
ENSMUSG00000089803	Gm10171	212.475	0.00111611	0.185405	0.974601	0.999351	231.206	0.0641505	0.394881	0.636361	0.917766
ENSMUSG00000026554	Dcaf8	11137.1	0.0712828	0.162164	0.445007	0.928357	10973.4	0.322119	0.259972	0.123468	0.485624
ENSMUSG00000013698	Pea15a	82.8865	0.00215036	0.187206	0.914726	0.995246	107.371	0.0465729	0.408541	0.5777	0.894547
ENSMUSG00000007122	Casq1	49.4683	-0.00515015	0.18752	0.727472	0.989823	29.0546	-0.0438435	0.415845	0.13964	0.514613
ENSMUSG00000007107	Atp1a4	19.2402	-0.00656877	0.18817	0.20261		168.844	0.160515	0.454399	0.049914	0.29287
ENSMUSG00000038034	Igsf8	146.953	-0.0115917	0.187833	0.488715	0.940602	186.609	-0.000818449	0.403933	0.979651	0.996201
ENSMUSG00000044708	Kcnj10	17.9459	-0.000298238	0.187859	0.954688		19.5663	0.00402045	0.41065	0.939328
ENSMUSG00000050229	Pigm	801.844	-0.00890664	0.183264	0.82667	0.992863	849.264	0.0814402	0.360108	0.666501	0.927658
ENSMUSG00000102278	RP23-157J4.3	5.95738	-0.00481793	0.188116	0.210586		58.2389	0.0555872	0.416673	0.229141	0.655504
ENSMUSG00000026548	Slamf9	5.59643	0.00500615	0.188117	0.208775
ENSMUSG00000037995	Igsf9	32.1963	0.0137403	0.188742	0.0362721	0.353027
ENSMUSG00000026547	Tagln2	29.5239	0.00907322	0.188347	0.0231643	0.298422	2.73253	0.0234515	0.413654	0.283951
ENSMUSG00000026546	Cfap45	393.914	-0.0223326	0.187115	0.491684	0.940602	379.679	-0.0649143	0.389002	0.643783	0.920337
ENSMUSG00000026544	Dusp23	162.366	0.0185588	0.187644	0.477929	0.938038	165.316	0.0479229	0.409463	0.552758	0.884568
ENSMUSG00000060128	Gm10075	4.91101	0.00227411	0.187917	0.763346		2.91646	0.00413601	0.411225	0.916137
ENSMUSG00000037942	Crp	31.299	-0.00650858	0.188012	0.471888	0.936437	30.1854	-0.0173319	0.411729	0.643571	0.920292
ENSMUSG00000066680	Olfr1407-ps1	2.58297	0.00483201	0.188104	0.306622
ENSMUSG00000005338	Cadm3	7.54684	-0.00483547	0.188118	0.185577		8.12471	-0.0152074	0.41226	0.618843
ENSMUSG00000066677	Pydc3	6.94714	-0.00482978	0.188117	0.194078		13.0687	0.00173685	0.411099	0.976758
ENSMUSG00000026532	Spta1	99.6645	0.000219974	0.186976	0.998877	0.999472	127.803	0.0459624	0.406367	0.618187	0.912336
ENSMUSG00000028354	Fmn2	16709.8	-0.190908	0.212279	0.0965909	0.554685	16748.6	-0.0517211	0.242306	0.821435	0.966024
ENSMUSG00000103079	RP24-151M13.1	191.013	0.0198718	0.18772	0.461209	0.933613	613.058	2.8674	0.798306	1.34873e-05	0.00126618
ENSMUSG00000026526	Fh1	254.631	0.0105377	0.185573	0.752104	0.989985	165.023	-0.0541439	0.400696	0.626034	0.914205
ENSMUSG00000026525	Opn3	180.327	0.0153982	0.188032	0.434043	0.924536	150.483	0.0921992	0.41239	0.403692	0.810889
ENSMUSG00000078185	Chml	792.486	-0.0677288	0.1971	0.207585	0.767249	857.385	-0.0427996	0.347914	0.816228	0.964979
ENSMUSG00000026523	Wdr64	174.416	-0.00293154	0.187103	0.865402	0.994267	145.636	-0.0212479	0.405383	0.781332	0.956869
ENSMUSG00000039748	Exo1	3436.35	-0.102907	0.200525	0.217282	0.777958	3192.42	-0.161633	0.331515	0.444946	0.832196
ENSMUSG00000104158	RP24-531A1.1	470.973	0.0341222	0.188334	0.386796	0.907285	198.535	-0.186848	0.457356	0.118174	0.473877
ENSMUSG00000055214	Pld5	38.2715	0.0115515	0.188349	0.272677	0.833436	6.02938	-0.00743404	0.411416	0.826446
ENSMUSG00000078184	B020018G12Rik	565.447	-0.0672866	0.200051	0.138834	0.663201	393.414	-0.298155	0.571069	0.0183504	0.177759
ENSMUSG00000057335	Cep170	2747.14	-0.0085535	0.170995	0.891584	0.994267	2806.28	0.149069	0.312566	0.482412	0.851294
ENSMUSG00000026504	Sdccag8	278.252	0.0344766	0.191198	0.175124	0.721987	155.16	0.049221	0.403499	0.638909	0.917779
ENSMUSG00000019699	Akt3	11230.2	-0.0751242	0.162566	0.420397	0.920595	12853.8	0.351837	0.253849	0.087338	0.399797
ENSMUSG00000063659	Zbtb18	5050.24	-0.197253	0.259622	0.0740566	0.489148	6424.29	0.310631	0.286404	0.159285	0.552549
ENSMUSG00000102885	RP23-326H11.2	3.99539	-0.0047782	0.188112	0.258071		3.578	-0.0229369	0.413681	0.284038
ENSMUSG00000015961	Adss	10370.6	-0.0666818	0.172248	0.439984	0.926324	10187.6	0.00750386	0.273705	0.945651	0.989206
ENSMUSG00000089657	Gm16585	9.90137	0.00510201	0.188123	0.152801
ENSMUSG00000091476	Gm16432	31.338	0.0092332	0.188098	0.411991	0.918621	49.0904	0.049621	0.415578	0.270914	0.701363
ENSMUSG00000026502	Desi2	7134.82	-0.0356183	0.1576	0.676528	0.981835	6934.37	0.0735502	0.246314	0.708652	0.940792
ENSMUSG00000103958	RP24-259F2.1	6.53967	-0.00250899	0.187937	0.711553		7.4063	-0.00453342	0.411232	0.892202
ENSMUSG00000070489	4930527J03Rik	26.5822	-0.00612469	0.188119	0.316011	0.864464	22.2631	-0.023504	0.413812	0.104271
ENSMUSG00000104126	RP24-252K15.3	26.5629	0.00273265	0.187657	0.836201	0.993242	11.6815	-0.0158914	0.412136	0.624301
ENSMUSG00000086350	B230369F24Rik	18.296	0.0051652	0.188126	0.106229		15.3958	0.0249469	0.413864	0.1107
ENSMUSG00000039630	Hnrnpu	18753.4	0.0438988	0.160553	0.623312	0.972654	12298.5	-0.73445	0.329182	0.00458734	0.0805186
ENSMUSG00000104279	RP24-252K15.4	29.2717	-0.00665714	0.188147	0.281353	0.840066	24.8213	-0.0252023	0.413962	0.0874561
ENSMUSG00000026495	Efcab2	73.2112	-0.00800435	0.187329	0.666047	0.98119	82.2851	-0.000333818	0.402541	0.987326	0.997852
ENSMUSG00000026494	Kif26b	957.552	-0.0351734	0.186608	0.450195	0.929394	1187.88	0.101986	0.371605	0.576501	0.894142
ENSMUSG00000055067	Smyd3	574.268	-0.0294447	0.185646	0.500404	0.942627	511.192	-0.0957745	0.387548	0.545164	0.881893
ENSMUSG00000096474	Gm5561	34.7437	0.000122459	0.187549	0.995892	0.999472	31.8964	0.00196336	0.408653	0.985228	0.997497
ENSMUSG00000026492	Tfb2m	4120.12	0.0879485	0.186771	0.308077	0.860574	3700.72	0.175274	0.319994	0.414318	0.81683
ENSMUSG00000038949	Cnst	9752.34	-0.0700108	0.165478	0.445392	0.928357	9073.73	-0.0676912	0.238307	0.726743	0.943878
ENSMUSG00000038936	Sccpdh	363.504	0.0344014	0.189582	0.315079	0.864141	171.172	-0.0338618	0.406273	0.672401	0.929271
ENSMUSG00000087236	Gm1305	54.8114	-0.00962128	0.188104	0.395829	0.911915	62.5229	-0.0280095	0.407618	0.692932	0.935891
ENSMUSG00000026491	Ahctf1	18729.5	0.0095716	0.147081	0.919074	0.995246	16160	-0.0648839	0.225339	0.728282	0.944157
ENSMUSG00000073486	Gm10518	18.1884	-0.00702572	0.188199	0.167711		24.6542	-0.0101331	0.410559	0.810475
ENSMUSG00000026490	Cdc42bpa	3033.54	-0.0553013	0.180613	0.447249	0.929083	4052.97	0.49105	0.37818	0.0561724	0.310413
ENSMUSG00000102194	RP23-204N23.3	30.8974	-0.00931881	0.188371	0.0201111	0.286653	29.8407	-0.0360346	0.414367	0.271978	0.702235
ENSMUSG00000026489	Adck3	92.4463	-0.00662851	0.187816	0.585792	0.96374	183.848	0.0318102	0.408877	0.659697	0.926415
ENSMUSG00000010609	Psen2	497.187	0.00180871	0.182333	0.973355	0.999351	499.268	0.0551988	0.382045	0.726447	0.943878
ENSMUSG00000026496	Parp1	1153.62	-0.063254	0.194232	0.250636	0.809011	1333.71	0.0384242	0.34321	0.849767	0.972036
ENSMUSG00000058729	Lin9	1249.58	-0.0668404	0.191773	0.29336	0.848911	919.091	-0.726223	0.709664	0.0256504	0.21018
ENSMUSG00000026499	Acbd3	7158.17	0.0363484	0.163968	0.665851	0.98119	7422.12	0.311909	0.318727	0.171377	0.572035
ENSMUSG00000060743	H3f3a	4585.63	0.135344	0.208771	0.169118	0.715113	3103.96	-0.150161	0.340105	0.470296	0.843411
ENSMUSG00000073485	H3f3aos	15.78	-0.000770919	0.187872	0.908108		8.68336	-0.0214834	0.413371	0.321976
ENSMUSG00000084558	Gm24836	20.4209	-0.00503073	0.188128	0.099378		18.2876	-0.0235148	0.413809	0.117568
ENSMUSG00000038806	Sde2	1033.53	-0.0110337	0.183807	0.766427	0.989985	737.424	-0.361471	0.508449	0.108314	0.452566
ENSMUSG00000066652	Lefty2	17.932	0.00638049	0.188181	0.0756087		34.8078	0.0354366	0.415019	0.0311716	0.228597
ENSMUSG00000026520	Pycr2	157.027	0.0306559	0.19088	0.129024	0.641833	158.244	0.140898	0.440209	0.119924	0.478212
ENSMUSG00000026519	Tmem63a	81.1301	0.0197483	0.188837	0.27256	0.833436	41.7539	0.0185609	0.409059	0.770176	0.953965
ENSMUSG00000038768	9130409I23Rik	140.057	-0.0196647	0.188043	0.410626	0.91829	118.934	-0.0834	0.413763	0.378952	0.796107
ENSMUSG00000102219	RP24-242P4.3	50.1798	-0.0104475	0.188461	0.00841923	0.191902	45.2102	-0.0411869	0.415889	0.0188305	0.179343
ENSMUSG00000026516	Nvl	1512.98	-0.0190241	0.176539	0.760622	0.989985	1279.37	-0.0953542	0.360782	0.608141	0.908616
ENSMUSG00000062169	Cnih4	196.92	-0.00522337	0.185753	0.853467	0.994035	132.202	-0.0815223	0.412843	0.394821	0.805105
ENSMUSG00000038733	Wdr26	36747.3	-0.0149846	0.145259	0.866177	0.994267	32706.6	-0.0422097	0.20708	0.784514	0.956869
ENSMUSG00000054135	A430110L20Rik	23.3082	0.00663588	0.188177	0.171485
ENSMUSG00000047369	Dnah14	393.296	-0.0319379	0.189501	0.292437	0.847965	581.584	0.0843863	0.386158	0.598871	0.903808
ENSMUSG00000004880	Lbr	1893.72	-0.0193501	0.175466	0.765856	0.989985	1363.98	-0.390917	0.470803	0.110263	0.456581
ENSMUSG00000022995	Enah	5815.72	0.0687152	0.169515	0.442954	0.92707	7354.64	0.890902	0.317402	0.000694838	0.0248704
ENSMUSG00000103317	RP23-73N8.3	16.4255	-0.00487157	0.188121	0.118981		14.7096	-0.0234446	0.413798	0.133803
ENSMUSG00000102760	RP23-73N8.1	21.9685	0.00567667	0.188149	0.0817753
ENSMUSG00000026511	Srp9	1371.03	0.0658423	0.191823	0.298279	0.853686	1268.42	0.232772	0.385741	0.280883	0.710707
ENSMUSG00000038633	Degs1	2644.53	0.0145084	0.168176	0.822548	0.992863	2477.39	0.0968568	0.305653	0.647125	0.921495
ENSMUSG00000047539	Fbxo28	1558.7	0.00869891	0.176106	0.887334	0.994267	1640.48	0.222286	0.352097	0.314569	0.741072
ENSMUSG00000026510	Trp53bp2	90.0457	0.0270993	0.190521	0.077807	0.498124	100.494	0.0818816	0.422626	0.132123	0.502932
ENSMUSG00000026509	Capn2	33.1391	0.00995818	0.188322	0.215039	0.775436	62.9015	0.0545037	0.417619	0.100899	0.435886
ENSMUSG00000104376	RP23-191P7.1	68.3576	-0.0208037	0.189752	0.000315965	0.0290136	61.9926	-0.090502	0.427591	0.0066431	0.0997619
ENSMUSG00000038576	Susd4	73.2009	0.00562377	0.18719	0.777027	0.989985	43.8113	-0.0168364	0.408166	0.784847	0.956869
ENSMUSG00000102291	RP23-160F6.1	3.99539	-0.0047782	0.188112	0.258071		3.578	-0.0229369	0.413681	0.284038
ENSMUSG00000079164	Tlr5	88.0099	0.00867314	0.187372	0.659343	0.978965	42.2358	-0.0264478	0.409458	0.66124	0.926415
ENSMUSG00000104367	CAAA01116243.1	16.8694	-0.00487278	0.188121	0.117085		15.1071	-0.0234587	0.4138	0.131725
ENSMUSG00000094807	Gm24975	34.1892	0.00115278	0.18753	0.944758	0.99729	25.014	-0.0067786	0.409352	0.888438
ENSMUSG00000030768	Disp1	392.553	-0.0207927	0.18612	0.558341	0.956242	334.279	-0.0808779	0.401001	0.523243	0.871315
ENSMUSG00000102478	RP24-268A16.1	45.2453	-0.00179031	0.187622	0.874698	0.994267	23.4916	-0.0240291	0.413858	0.0977078
ENSMUSG00000118599		73.6378	0.0244572	0.190369	0.00346299	0.118277
ENSMUSG00000046836	Brox	3057.59	-0.0142022	0.169976	0.843649	0.993659	3828.88	0.560284	0.356672	0.0298232	0.224003
ENSMUSG00000042901	Aida	1936.83	-0.0780131	0.194759	0.261594	0.818776	2126.88	0.0480712	0.304114	0.82015	0.96556
ENSMUSG00000056050	Mia3	1407.43	0.0147516	0.17647	0.817459	0.992096	1150.17	-0.0475976	0.346598	0.797922	0.959789
ENSMUSG00000072258	Taf1a	1989.25	-0.00437452	0.173342	0.942691	0.99729	1727.64	-0.0561473	0.315042	0.77998	0.956433
ENSMUSG00000053461	Hhipl2	31.0724	-0.00551641	0.187796	0.634086	0.974767	218.665	0.232631	0.507955	0.0183118	0.177489
ENSMUSG00000103451	RP24-411K2.1	28.3639	0.00120892	0.18765	0.933123	0.995758	11.6205	-0.0234354	0.413791	0.153291
ENSMUSG00000103305	RP23-352D14.1	64.4723	0.0183489	0.189239	0.0617405	0.444489	20.4833	0.0246832	0.412738	0.496515
ENSMUSG00000102743	RP24-187H3.2	4.73544	0.00497347	0.188114	0.227702
ENSMUSG00000039384	Dusp10	1289.04	0.0329937	0.179321	0.59499	0.965749	961.356	-0.0888277	0.348397	0.645576	0.920675
ENSMUSG00000044854	1700056E22Rik	105.623	0.0058684	0.187466	0.731455	0.989914	35.7541	-0.0498822	0.417315	0.0144135	0.155402
ENSMUSG00000101574	1700112H15Rik	35.421	-0.00793272	0.188277	0.0263754	0.31658	31.9131	-0.0311034	0.414564	0.0497366	0.292247
ENSMUSG00000103308	RP24-286C21.1	3.10752	-0.00474293	0.188109	0.291589		2.78289	-0.0227258	0.413638	0.319727
ENSMUSG00000092578	4930488B22Rik	3.55145	-0.00476328	0.188111	0.273428		3.18044	-0.0228415	0.413662	0.30041
ENSMUSG00000039377	Hlx	30.0275	-0.00414568	0.187776	0.702065	0.986161	19.5498	-0.0328452	0.414202	0.261567
ENSMUSG00000073481	Marc2	649.873	0.0584017	0.194739	0.220053	0.780187	496.126	0.100435	0.381275	0.551427	0.884279
ENSMUSG00000039349	C130074G19Rik	796.929	0.0267814	0.188376	0.386004	0.906556	543.726	0.0497975	0.382502	0.749593	0.948352
ENSMUSG00000026620	Mark1	3.55145	-0.00476328	0.188111	0.273428		12.7443	0.0126882	0.411777	0.72886
ENSMUSG00000104461	RP23-450D2.3	22.0291	-0.00743629	0.188246	0.0467336		19.7679	-0.0282746	0.414251	0.0843364
ENSMUSG00000039318	Rab3gap2	6437.37	-0.063821	0.176456	0.417032	0.919792	6441.17	0.0268695	0.252478	0.893702	0.981639
ENSMUSG00000026618	Iars2	487.546	-0.00734806	0.185995	0.789322	0.991121	494.649	0.00874241	0.376293	0.961966	0.992487
ENSMUSG00000102526	RP24-150H14.3	18.0808	0.00517889	0.188127	0.107005		61.5831	0.0548158	0.41821	0.00444374	0.0791863
ENSMUSG00000026617	Bpnt1	17.3711	0.000341811	0.187818	0.98334		127.614	0.0928149	0.426685	0.0722628	0.357916
ENSMUSG00000097261	4930532G15Rik	6.51888	0.00428674	0.188048	0.438749		28.4808	0.0462994	0.416406	0.0795675
ENSMUSG00000026615	Eprs	3477.03	0.0274596	0.170202	0.721466	0.989515	2387.59	-0.437459	0.38649	0.0821223	0.386953
ENSMUSG00000103799	RP24-71M17.1	9.70679	-0.00484895	0.188119	0.161539		8.71412	-0.0233428	0.413772	0.179957
ENSMUSG00000039246	Lyplal1	692.436	-0.0178095	0.181691	0.720148	0.989307	675.018	0.00346399	0.378512	0.989294	0.998201
ENSMUSG00000103056	RP24-275B23.1	3.44371	-0.00475865	0.18811	0.277732		3.10266	-0.0228162	0.413657	0.304139
ENSMUSG00000089363	Gm23821	9.63413	0.00510234	0.188122	0.155201
ENSMUSG00000039239	Tgfb2	16021.8	-0.125723	0.197628	0.206136	0.765676	16572.7	0.0305547	0.259688	0.884365	0.980182
ENSMUSG00000100393	Gm29491	3.55145	-0.00476328	0.188111	0.273428		3.18044	-0.0228415	0.413662	0.30041
ENSMUSG00000102619	RP24-276N20.3	47.8992	-0.0155132	0.188983	0.00218907	0.0930616	43.0903	-0.0593462	0.419203	0.00681273	0.101132
ENSMUSG00000001305	Rrp15	870.353	0.0810384	0.205568	0.128292	0.639897	532.51	0.00895281	0.370069	0.963024	0.992487
ENSMUSG00000097784	A430105J06Rik	120.4	0.0180248	0.188806	0.244848	0.805403	19.2853	-0.0220775	0.413454	0.298288
ENSMUSG00000104312	RP23-429I18.2	66.7076	0.00881448	0.187637	0.602167	0.968082	21.9429	-0.0250065	0.412877	0.458644
ENSMUSG00000039224	D1Pas1	2985.55	0.0216593	0.171004	0.771811	0.989985	1608.6	-1.5881	0.681477	0.000942356	0.0309639
ENSMUSG00000039210	Gpatch2	1520.04	-0.00599345	0.178499	0.911335	0.995246	1520.03	0.0765035	0.347106	0.699123	0.938549
ENSMUSG00000104394	RP23-306B14.3	390.431	0.0112283	0.183862	0.787852	0.991121	286.503	-0.0514564	0.387174	0.714323	0.94164
ENSMUSG00000104245	RP23-349L18.2	27.9807	-0.00940161	0.188377	0.0218115	0.292598	25.1324	-0.0356996	0.415109	0.0455389
ENSMUSG00000026610	Esrrg	2788.54	-0.00247868	0.171579	0.968003	0.999242	2390.81	-0.0664441	0.312597	0.743395	0.947729
ENSMUSG00000103401	RP24-177B16.1	5.90351	-0.0048169	0.188116	0.211618		25.8128	0.0182609	0.411976	0.636847
ENSMUSG00000104482	RP23-15D21.1	18.1476	0.00567754	0.18806	0.431604		6.01695	0.0101232	0.411559	0.784695
ENSMUSG00000026609	Ush2a	1740.33	0.14658	0.246598	0.076276	0.49516	1377.8	0.196999	0.359436	0.357624	0.781137
ENSMUSG00000026608	Kctd3	19133.1	0.00761954	0.145913	0.944345	0.99729	19674.4	0.294731	0.231163	0.127833	0.493555
ENSMUSG00000037624	Kcnk2	43.6867	0.0147951	0.18889	0.00297669	0.11042
ENSMUSG00000102824	RP23-411B11.2	3.63683	0.00182231	0.187901	0.812582		3.87908	0.0111764	0.411683	0.753625
ENSMUSG00000093791	Gm24092	2.45606	-0.000528837	0.187875	0.940249
ENSMUSG00000026605	Cenpf	22245.1	-0.037329	0.153287	0.642204	0.976689	24992.2	0.378884	0.252599	0.0658945	0.339154
ENSMUSG00000103374	RP24-511M8.2	6.02692	0.00502095	0.188117	0.200757
ENSMUSG00000026604	Ptpn14	418.911	-0.0159819	0.184897	0.671193	0.981835	776.845	0.573597	0.710946	0.0416087	0.267171
ENSMUSG00000097925	Gm26574	21.6462	-0.00527789	0.188138	0.0887294		19.5024	-0.0235381	0.413813	0.113097
ENSMUSG00000026603	Smyd2	33.6354	0.00950728	0.188261	0.267736	0.825815	12.9064	0.0147866	0.412036	0.670911
ENSMUSG00000010175	Prox1	253.09	-0.0272871	0.188167	0.39156	0.910355	238.146	-0.0541294	0.401881	0.614756	0.911172
ENSMUSG00000103510	RP24-240P15.2	473.141	0.014718	0.184755	0.707702	0.987578	502.779	0.161446	0.403354	0.361543	0.784378
ENSMUSG00000093064	Gm23153	21.6347	0.00774179	0.188119	0.37806		14.5832	0.0219612	0.412388	0.553801
ENSMUSG00000089872	Rps6kc1	32.6346	-0.00571346	0.187813	0.619038	0.971761	66.001	0.0362691	0.408878	0.62594	0.914205
ENSMUSG00000026634	Angel2	12414.5	-0.122865	0.182163	0.222239	0.782913	14586.4	0.330901	0.256061	0.11071	0.457805
ENSMUSG00000037568	Vash2	142.928	0.00988018	0.187395	0.626548	0.972797	54.0836	-0.0406113	0.413582	0.385036	0.799916
ENSMUSG00000103964	RP23-399N18.1	37.3181	0.00440706	0.187879	0.663109	0.980283	37.5296	0.0212128	0.411621	0.63614	0.917766
ENSMUSG00000066595	Mfsd7b	612.179	0.0259833	0.184265	0.585061	0.963343	369.765	-0.127071	0.406816	0.388504	0.801533
ENSMUSG00000097845	A230020J21Rik	22.5676	-0.00494496	0.187979	0.536448		16.743	-0.0235056	0.413807	0.12395
ENSMUSG00000026632	Tatdn3	125.713	0.0207358	0.188605	0.335685	0.874672	62.6843	0.00430564	0.407767	0.959605	0.991945
ENSMUSG00000062510	Nsl1	36.6218	0.00693169	0.187784	0.610009	0.970057	9.95786	-0.0211559	0.413302	0.354519
ENSMUSG00000026628	Atf3	504.134	0.0900047	0.219048	0.00958117	0.206282	142.733	-0.00161664	0.40451	0.971862	0.995391
ENSMUSG00000026627	Tmem206	381.063	-0.0164203	0.185689	0.631551	0.97398	296.591	-0.091406	0.408479	0.434707	0.827384
ENSMUSG00000026626	Ppp2r5a	639.284	0.0142461	0.181881	0.77587	0.989985	595.533	0.0704163	0.367066	0.696813	0.937679
ENSMUSG00000037474	Dtl	3424.99	0.015294	0.165483	0.880614	0.994267	2154.36	-0.904358	0.503925	0.00750107	0.106353
ENSMUSG00000037461	Ints7	914.043	-0.000474884	0.180154	0.98765	0.999472	474.798	-1.46595	1.93961	0.00650555	0.0987797
ENSMUSG00000102970	RP24-566B6.2	7.37938	-0.0048339	0.188118	0.187911		6.64856	-0.023256	0.413752	0.208081
ENSMUSG00000026623	Lpgat1	2252.22	-0.157308	0.261029	0.0622115	0.446944	2678.57	0.0306632	0.332133	0.882343	0.979737
ENSMUSG00000102840	RP23-355E19.1	44.7391	0.000319253	0.187708	0.992354	0.999472	47.051	0.00995082	0.408841	0.87798	0.978694
ENSMUSG00000026622	Nek2	6055.07	0.0312076	0.159865	0.721783	0.989515	4096.72	-0.614884	0.356723	0.0185221	0.177849
ENSMUSG00000055833	1700034H15Rik	427.049	-0.0378551	0.189871	0.303167	0.856636	409.251	-0.11316	0.396408	0.46362	0.839001
ENSMUSG00000037434	Slc30a1	2346.96	0.146819	0.247818	0.075816	0.494366	899.926	-2.06828	0.855996	0.000564625	0.0218779
ENSMUSG00000049353	Rd3	211.454	-0.00225967	0.186709	0.909162	0.995246	131.683	-0.0900999	0.417732	0.309989	0.737176
ENSMUSG00000097416	Gm26670	56.9074	0.00249518	0.18736	0.888037	0.994267	35.6295	-0.0122826	0.41004	0.794983	0.958945
ENSMUSG00000026637	Traf5	49.3824	-0.0178499	0.189133	0.0844507	0.515948	102.54	0.0251982	0.404916	0.776359	0.955703
ENSMUSG00000103653	WI1-1003N17.1	13.9388	0.00285834	0.187927	0.715818		15.1026	0.0156308	0.412022	0.66176
ENSMUSG00000037395	Rcor3	175.186	-0.0387372	0.193853	0.00360124	0.120518	162.233	-0.204343	0.487037	0.0127096	0.145105
ENSMUSG00000097316	Gm10516	66.0008	-0.0223964	0.189986	0.00577481	0.154329	174.689	0.0919392	0.408556	0.445853	0.832196
ENSMUSG00000058248	Kcnh1	6777.2	-0.0762534	0.180429	0.368604	0.894479	5946.85	-0.212265	0.307836	0.327589	0.754304
ENSMUSG00000037375	Hhat	237.168	0.0405787	0.192052	0.194759	0.751802	206.345	0.139758	0.424953	0.276852	0.706273
ENSMUSG00000094131	Gm22265	150.847	0.0371504	0.192624	0.0752061	0.492888	139.582	0.168987	0.454944	0.0839123	0.391758
ENSMUSG00000047384	A730013G03Rik	15.9283	0.00517134	0.188126	0.115605		238.962	11.8443	3.3756	2.74136e-09	5.29856e-07
ENSMUSG00000016200	Syt14	207.89	-0.0276896	0.18864	0.353431	0.884794	160.711	-0.093046	0.41936	0.282088	0.711435
ENSMUSG00000016181	Diexf	1015.76	-0.0616171	0.191767	0.29292	0.848221	726.093	-0.811064	0.886184	0.019754	0.184817
ENSMUSG00000026638	Irf6	21.1132	0.00729245	0.188186	0.238562		64.1901	0.0600311	0.419054	0.0377821	0.254082
ENSMUSG00000079144	A130010J15Rik	74.4735	-0.00353589	0.187499	0.800078	0.991606	80.2396	0.00101323	0.407007	0.998858	0.999588
ENSMUSG00000026639	Lamb3	85.0746	-0.0182661	0.189266	0.0400412	0.370513	74.3847	-0.0873525	0.426614	0.00553721	0.0901934
ENSMUSG00000016194	Hsd11b1	7.41247	0.000908898	0.187873	0.91817		2.78289	-0.0227258	0.413638	0.319727
ENSMUSG00000016179	Camk1g	35.6644	-0.00876692	0.188313	0.0900974	0.534792	38.7701	-0.0232864	0.412052	0.558704	0.886498
ENSMUSG00000097850	4631405K08Rik	24.8602	-0.00594821	0.188168	0.0655669		22.2631	-0.023504	0.413812	0.104271
ENSMUSG00000026640	Plxna2	1044.52	-0.057596	0.194923	0.201828	0.759681	951.21	-0.218901	0.424125	0.245651	0.676257
ENSMUSG00000102523	RP23-288J11.1	6.14949	-0.00483097	0.188117	0.207125		5.54047	-0.0231713	0.413734	0.228744
ENSMUSG00000096929	A330023F24Rik	15.0673	0.00516302	0.188126	0.119544
ENSMUSG00000104077	RP23-445K23.6	25.5819	-0.00607572	0.188174	0.0617205	0.444489	23.0483	-0.0236458	0.413825	0.101392
ENSMUSG00000016481	Cr1l	174.34	0.0183757	0.188011	0.429637	0.92359	48.7036	-0.0612399	0.419626	0.0052021	0.0868126
ENSMUSG00000026616	Cr2	14.2668	-0.00487129	0.188121	0.129427		34.2741	0.00971179	0.410589	0.844849	0.971296
ENSMUSG00000050530	Fam171a1	115.402	0.02144	0.18863	0.336241	0.874672	28.0388	-0.0395596	0.415636	0.0331752
ENSMUSG00000026643	Nmt2	995.637	-0.053755	0.190796	0.306807	0.859513	1061.71	-0.0165937	0.353349	0.913164	0.983579
ENSMUSG00000049950	Rpp38	34.0386	-0.00595774	0.187939	0.540031	0.953202	31.9557	-0.0281513	0.411232	0.578519	0.894547
ENSMUSG00000026644	Acbd7	49.0906	-0.00151818	0.187609	0.892356	0.99433	86.2795	0.0534272	0.410368	0.509316	0.864128
ENSMUSG00000026645	Olah	830.379	-0.0212936	0.185217	0.592751	0.965282	1454.13	0.456582	0.591421	0.0692752	0.349654
ENSMUSG00000026650	Meig1	15.0047	-0.00486523	0.188121	0.125616		40.294	0.0138784	0.410612	0.781876	0.956869
ENSMUSG00000026648	Dclre1c	272.414	0.0501937	0.195294	0.128177	0.639897	231.547	0.151117	0.430817	0.240985	0.670358
ENSMUSG00000026646	Suv39h2	3504.77	0.0392594	0.167995	0.612746	0.971463	3794.88	0.396189	0.357794	0.105233	0.446162
ENSMUSG00000109865		1608.59	-0.0361712	0.179106	0.576346	0.961814	933.643	-2.04202	0.735587	0.000229544	0.0115632
ENSMUSG00000051396	Hspa14	603.295	0.00915218	0.184615	0.818586	0.992462	432.815	-0.0826944	0.383709	0.599696	0.904555
ENSMUSG00000039496	Cdnf	30.3019	-0.00898365	0.188254	0.239996	0.802087	59.4808	0.0107484	0.408381	0.875071	0.978021
ENSMUSG00000026655	Fam107b	2102.63	-0.00507165	0.173115	0.935334	0.996346	2509.15	0.367883	0.396456	0.131961	0.502797
ENSMUSG00000085205	Gm13185	11.5288	-0.00448699	0.188083	0.320772		9.93889	-0.0233876	0.413781	0.16736
ENSMUSG00000085656	Gm13180	90.3084	0.00944905	0.187813	0.542626	0.953202	45.2479	-7.3622e-05	0.408776	0.985265	0.997497
ENSMUSG00000086445	Gm13191	159.362	0.0235556	0.188801	0.326062	0.870573	145.824	0.0762387	0.413057	0.409275	0.813411
ENSMUSG00000026657	Frmd4a	741.631	0.0846077	0.211543	0.0593613	0.437503	954.13	1.5924	0.810837	0.00209268	0.0510856
ENSMUSG00000086458	Gm2639	12.6521	-0.00481199	0.188118	0.138835		11.3303	-0.0234271	0.413789	0.155501
ENSMUSG00000081889	Gm13188	25.3723	-0.00798604	0.188258	0.123196	0.627329	64.1619	0.0173262	0.40986	0.764852	0.952231
ENSMUSG00000104284	RP23-74F20.2	21.2783	0.0023973	0.187882	0.785885		5.9837	-0.0232128	0.413742	0.219848
ENSMUSG00000102517	RP23-74F20.3	12.6681	-0.00280772	0.187953	0.669316		25.1515	0.00872492	0.411043	0.844849
ENSMUSG00000039449	Prpf18	2661.91	0.534622	0.520744	0.0106197	0.218805	2090.51	0.262186	0.390758	0.234966	0.663045
ENSMUSG00000048186	Bend7	16.9726	-0.00487205	0.188121	0.116675		72.1891	0.0337769	0.412062	0.522057	0.870941
ENSMUSG00000083407	Gm13176	54.5106	-0.00709852	0.187841	0.563443	0.95827	74.8703	0.00473613	0.404389	0.964502	0.992657
ENSMUSG00000026662	Sephs1	362.928	-0.0406931	0.190644	0.276642	0.835649	671.425	0.297942	0.476449	0.14808	0.531055
ENSMUSG00000026664	Phyh	137.736	-0.0144979	0.187222	0.552478	0.955798	144.968	-0.0115097	0.40277	0.88709	0.981113
ENSMUSG00000069188	Gm13192	42.0548	0.011682	0.188563	0.0073535	0.176526	6.3759	0.0242772	0.413779	0.18397
ENSMUSG00000026669	Mcm10	2517.22	-0.102934	0.211585	0.143226	0.670151	2242.61	-0.381294	0.405604	0.120654	0.480072
ENSMUSG00000026672	Optn	584.111	-0.00232435	0.182272	0.952712	0.998333	491.352	-0.0493245	0.370648	0.763046	0.951939
ENSMUSG00000026676	Ccdc3	6.80231	0.0032896	0.187972	0.630873		19.724	0.0368402	0.41457	0.249794
ENSMUSG00000039145	Camk1d	1867.71	0.11136	0.216551	0.137409	0.659611	1785.63	0.474878	0.434306	0.0718561	0.356757
ENSMUSG00000039128	Cdc123	313.088	0.0323675	0.189178	0.334638	0.873428	132.924	-0.0908514	0.413658	0.376287	0.794062
ENSMUSG00000025817	Nudt5	1251.17	-0.00216285	0.177619	0.971494	0.999351	1696.96	0.439033	0.506471	0.0853958	0.395648
ENSMUSG00000056718	Gm13199	36.3626	0.0086279	0.188275	0.169856	0.716073
ENSMUSG00000025816	Sec61a2	169.751	0.0170926	0.18728	0.529441	0.950797	162.979	0.0828869	0.407022	0.479714	0.849334
ENSMUSG00000085818	Gm13267	54.9162	-0.0149554	0.188762	0.128612	0.640734	66.7819	-0.028049	0.409311	0.651822	0.923331
ENSMUSG00000025815	Dhtkd1	1821.61	0.0873645	0.198163	0.233112	0.793971	1049.72	-0.267656	0.425895	0.205807	0.622567
ENSMUSG00000043241	Upf2	2292.57	0.00310688	0.171346	0.969011	0.999242	2921.64	0.58204	0.428349	0.037314	0.251787
ENSMUSG00000045319	Proser2	218.564	-0.0205738	0.187639	0.456889	0.930782	386.055	0.115814	0.412044	0.383933	0.799238
ENSMUSG00000082332	Gm13384	3.03812	-6.64116e-05	0.187871	0.986954
ENSMUSG00000102887	RP23-413M3.5	5391.15	-0.341638	0.405485	0.0248342	0.307532	5887.88	-0.0521124	0.275931	0.796256	0.95942
ENSMUSG00000039063	Echdc3	701.62	0.0169694	0.183678	0.703631	0.986752	475.862	-0.0882649	0.390934	0.555338	0.885073
ENSMUSG00000039046	Usp6nl	917.062	0.0892128	0.209522	0.120212	0.62126	779.49	0.186605	0.413555	0.304023	0.731518
ENSMUSG00000086109	Gm13391	213.244	-0.0108856	0.186106	0.70612	0.987488	259.751	0.0504463	0.39356	0.705481	0.940496
ENSMUSG00000102599	RP23-256D19.3	4.99473	0.00025677	0.187868	0.981936		3.50927	-0.00521525	0.411303	0.878626
ENSMUSG00000002107	Celf2	3595.34	-0.0684285	0.18414	0.365559	0.892191	3428.91	-0.0886215	0.291453	0.667041	0.927905
ENSMUSG00000065824	Gm26315	5713.37	0.118769	0.191454	0.220887	0.781265	5315.2	0.299529	0.288519	0.171698	0.572414
ENSMUSG00000085070	Gm13211	49.2096	-0.0116757	0.188466	0.159306	0.702061	90.5627	0.00855098	0.406422	0.918644	0.984334
ENSMUSG00000082953	Gm13217	48.0222	-0.0105556	0.188044	0.426674	0.921878	67.2423	0.000774872	0.407328	0.996491	0.99945
ENSMUSG00000085580	1700061F12Rik	7.67474	-0.000762339	0.187876	0.891554		5.99602	-0.00874176	0.411513	0.796423
ENSMUSG00000079604	Gm13219	62.7666	0.0161835	0.188882	0.130642	0.645736	148.418	0.15958	0.459014	0.00518955	0.0868126
ENSMUSG00000015619	Gata3	239.045	-0.00148556	0.18616	0.946037	0.997437	214.704	-0.00840253	0.390023	0.939593	0.988466
ENSMUSG00000075534	Gm13262	25.748	-0.00612788	0.188176	0.0604703	0.440524	38.3149	-0.00690502	0.410248	0.868748	0.977688
ENSMUSG00000025782	Taf3	17775.4	-0.0672955	0.163216	0.452493	0.930457	16903	-0.0183033	0.247946	0.922776	0.985778
ENSMUSG00000025781	Atp5c1	1568.94	-0.101857	0.212565	0.133008	0.650993	1580.76	-0.123925	0.34997	0.547181	0.883008
ENSMUSG00000037262	Kin	520.01	-0.0332685	0.188654	0.360782	0.888872	434.573	-0.211664	0.44373	0.203999	0.620248
ENSMUSG00000025780	Itih5	20.236	-0.00637169	0.188107	0.351518		47.6154	0.0189169	0.409524	0.754946	0.949536
ENSMUSG00000086748	Gm13261	119.147	0.0232178	0.188903	0.306994	0.859513	28.2419	-0.0399103	0.415687	0.032323
ENSMUSG00000061186	Sfmbt2	291.199	-0.012821	0.187541	0.534909	0.953202	174.302	-0.266472	0.560059	2.20326e-07	3.3516e-05
ENSMUSG00000076126	Mir669b	28.4116	-0.00665271	0.188203	0.0476345	0.396972	25.4436	-0.0258014	0.414018	0.0827175
ENSMUSG00000080504	Mir669d-2	6.21505	-0.00481963	0.188116	0.205886		5.56578	-0.0231753	0.413735	0.228114
ENSMUSG00000077981	Mir466f-3	6.21505	-0.00481963	0.188116	0.205886		5.56578	-0.0231753	0.413735	0.228114
ENSMUSG00000076028	Mir669a-3	14.2058	-0.00487128	0.188121	0.129729		12.7218	-0.0234391	0.413794	0.145562
ENSMUSG00000095843	Gm26491	17.7573	-0.00481617	0.188119	0.113506		15.9022	-0.0234878	0.413804	0.1278
ENSMUSG00000095938	Gm25701	2.44162	-0.00470517	0.188105	0.32643		2.18656	-0.0224606	0.413587	0.356651
ENSMUSG00000096027	Mir467a-2	8.87864	-0.00484533	0.188119	0.169758		7.95111	-0.0233212	0.413766	0.189107
ENSMUSG00000096492	Mir467a-4	7.99077	-0.00483912	0.188118	0.179893		7.156	-0.023283	0.413758	0.200076
ENSMUSG00000095884	Gm26431	5.77111	-0.00481467	0.188116	0.214053		5.16822	-0.0231296	0.413726	0.236897
ENSMUSG00000096782	Gm24640	8.21274	-0.00484079	0.188118	0.177215		7.35478	-0.0232938	0.41376	0.19718
ENSMUSG00000094688	Mir467a-7	7.99077	-0.00483912	0.188118	0.179893		7.156	-0.023283	0.413758	0.200076
ENSMUSG00000094709	Gm24488	4.43932	-0.00479015	0.188113	0.244856		3.97556	-0.0230018	0.413696	0.269919
ENSMUSG00000094457	Gm22626	8.21274	-0.00484079	0.188118	0.177215		7.35478	-0.0232938	0.41376	0.19718
ENSMUSG00000083900	Gm13294	32.3714	0.0112033	0.188477	0.0938053	0.545057	26.7099	0.041846	0.415535	0.14806
ENSMUSG00000026778	Prkcq	64.2953	-0.0129647	0.188421	0.261573	0.818776	184.038	0.0480046	0.410948	0.514312	0.866735
ENSMUSG00000102992	RP23-291L24.4	25.3041	-0.00604241	0.188172	0.0629615		22.6607	-0.0235348	0.413815	0.103136
ENSMUSG00000102674	RP23-247J17.2	2.58969	0.00401285	0.188031	0.483383
ENSMUSG00000082424	Gm13292	11.9578	-0.000465639	0.187831	0.944916		7.81635	-0.0116402	0.411802	0.721175
ENSMUSG00000026773	Pfkfb3	1074.7	0.0392374	0.187687	0.405383	0.91708	613.962	-0.192444	0.405635	0.307856	0.734713
ENSMUSG00000102329	RP23-428M4.4	25.3095	-0.00965059	0.188373	0.0847546		24.3509	-0.0317236	0.41376	0.334875
ENSMUSG00000102376	RP23-307N14.2	71.9728	0.000898425	0.187472	0.963355	0.998605	91.2216	0.0281082	0.408714	0.690283	0.935004
ENSMUSG00000037197	Rbm17	5369.19	-0.186671	0.240977	0.0937807	0.545057	4539.96	-0.476708	0.366477	0.0583377	0.315377
ENSMUSG00000026770	Il2ra	98.1769	-0.0284025	0.190905	0.045659	0.39297	88.404	-0.0857716	0.423718	0.116104	0.46878
ENSMUSG00000058594	Fbxo18	8685.82	0.0647171	0.166809	0.476591	0.937526	8973.76	0.372266	0.317501	0.109508	0.454998
ENSMUSG00000047909	Ankrd16	154.641	-0.0315762	0.190938	0.138956	0.663458	178.997	-0.0548651	0.402821	0.60281	0.905772
ENSMUSG00000026768	Itga8	447.105	0.00127118	0.182784	0.982153	0.999472	564.517	0.193053	0.419333	0.283715	0.713588
ENSMUSG00000086843	E030013I19Rik	13.2829	-0.00486244	0.188121	0.134979		23.8084	0.000706966	0.410833	0.99748
ENSMUSG00000026767	Fam188a	2425.27	-0.0722557	0.187794	0.333941	0.873328	2363.1	-0.0710599	0.301079	0.73433	0.945479
ENSMUSG00000102630	RP23-232K16.3	6.34744	-0.00481986	0.188116	0.203681		38.0513	0.0346764	0.41313	0.437775	0.828861
ENSMUSG00000104449	RP23-232K16.2	13.7965	-0.00507527	0.188107	0.268953		11.9724	-0.023435	0.413792	0.150711
ENSMUSG00000104406	RP23-232K16.4	40.7823	-0.00974097	0.188282	0.247481	0.807851	33.4404	-0.0413059	0.415897	0.0253285	0.208897
ENSMUSG00000026730	Pter	903.045	0.00159151	0.178629	0.98181	0.999472	1244.59	0.560507	0.536282	0.0494609	0.292195
ENSMUSG00000103143	RP23-415C3.4	23.4613	-0.00196618	0.187861	0.800262		22.4576	-0.00788249	0.410725	0.841309
ENSMUSG00000026727	Rsu1	861.844	-0.0299417	0.183979	0.549182	0.955722	990.623	0.0756608	0.371669	0.669339	0.92844
ENSMUSG00000102691	RP23-415C3.8	5.59643	0.00500615	0.188117	0.208775		62.3928	0.0562898	0.41851	0.00395031	0.0734159
ENSMUSG00000103232	RP23-336A16.3	8.4347	-0.00484238	0.188118	0.174637		7.55356	-0.0232926	0.413762	0.19439
ENSMUSG00000086358	Gm13270	13.2117	0.00514393	0.188125	0.12928		4.55422	0.0240145	0.413739	0.219972
ENSMUSG00000026726	Cubn	256.965	-0.0101751	0.185846	0.733765	0.989985	432.514	0.256229	0.468625	0.158879	0.55161
ENSMUSG00000026723	Trdmt1	154.478	-0.0109634	0.187673	0.533793	0.953202	242.013	0.0495765	0.400468	0.666147	0.927626
ENSMUSG00000026728	Vim	69.6973	-0.0107434	0.188073	0.41397	0.918621	98.5689	0.000991805	0.405983	0.998363	0.99945
ENSMUSG00000003418	St8sia6	379.866	0.054797	0.196129	0.148443	0.680753	618.807	1.75618	0.954477	0.00227491	0.0538538
ENSMUSG00000063275	Ptpla	43.479	0.00375083	0.187808	0.734991	0.989985	12.4106	-0.0234415	0.413793	0.147676
ENSMUSG00000086657	Stamos	24.9951	-0.00120716	0.187825	0.878178		14.4277	-0.0203763	0.413144	0.402995
ENSMUSG00000026718	Stam	302.604	-0.00861932	0.186675	0.719298	0.989307	509.969	0.222649	0.448136	0.19893	0.612945
ENSMUSG00000026712	Mrc1	743.203	0.000558383	0.181915	0.998349	0.999472	792.279	0.126248	0.373001	0.50598	0.863105
ENSMUSG00000084901	Gm13266	10.793	0.00329488	0.187969	0.637105
ENSMUSG00000057914	Cacnb2	857.985	0.00687595	0.179636	0.902902	0.995173	742.143	-0.0073357	0.356031	0.962512	0.992487
ENSMUSG00000103050	RP23-446D4.8	609.591	0.0927161	0.215755	0.0638961	0.452851	444.155	0.159987	0.411632	0.337055	0.762924
ENSMUSG00000087086	Gm13269	260.819	-0.012585	0.185516	0.702442	0.986217	304.085	0.0539424	0.386916	0.716343	0.941806
ENSMUSG00000085281	Gm13316	8.23508	0.000414781	0.187867	0.969346		19.1894	0.0197795	0.412195	0.596371
ENSMUSG00000026707	Nsun6	9.50501	0.00416384	0.188035	0.479105
ENSMUSG00000017418	Arl5b	708.39	0.0173127	0.181692	0.736104	0.989985	576.47	-0.00872283	0.376102	0.948507	0.990253
ENSMUSG00000102258	RP23-379F6.3	6.48429	0.0036792	0.187999	0.566594		28.5362	0.0434239	0.41579	0.134194
ENSMUSG00000075520	Malrd1	7.82905	-0.00123215	0.187883	0.869205		7.1649	-0.00505522	0.411256	0.880399
ENSMUSG00000103865	RP23-131N18.1	2.6952	-0.00214258	0.187921	0.759132		3.13921	-0.00260367	0.411195	0.937519
ENSMUSG00000026748	Plxdc2	225.391	-0.00744364	0.185451	0.808475	0.991606	135.242	-0.139707	0.436873	0.151852	0.537667
ENSMUSG00000053702	Nebl	606.374	0.0499933	0.19121	0.295864	0.852415	421.163	0.015949	0.377886	0.92388	0.986253
ENSMUSG00000054057	A930004D18Rik	38.0664	-0.00124349	0.187753	0.890213	0.994267	48.6221	0.0103066	0.409372	0.865125	0.976437
ENSMUSG00000054074	Skida1	349.018	-0.0290262	0.187605	0.425562	0.921419	234.586	-0.268577	0.526128	0.0453451	0.279016
ENSMUSG00000026743	Mllt10	14757.1	0.000106125	0.151455	0.997188	0.999472	16696.8	0.459835	0.284206	0.0408361	0.265001
ENSMUSG00000026740	Dnajc1	1218.99	0.179857	0.3206	0.0144602	0.24647	1002.82	0.547369	0.62335	0.0496891	0.292247
ENSMUSG00000082520	Gm13349	6.20886	-0.00199961	0.187912	0.774589		3.98914	-0.0230033	0.413696	0.269619
ENSMUSG00000051154	Commd3	1374.83	0.0171541	0.176033	0.79288	0.991121	2047.21	1.00786	0.486506	0.00354629	0.0684629
ENSMUSG00000026739	Bmi1	74879	0.131601	0.162674	0.221014	0.781548	77926.9	0.530891	0.225858	0.00651601	0.0988472
ENSMUSG00000026737	Pip4k2a	195.007	0.0028109	0.186498	0.913776	0.995246	332.198	0.146579	0.432902	0.218876	0.641904
ENSMUSG00000083281	Gm13332	3.88789	0.00382144	0.188013	0.52966		3.31654	0.0179564	0.412593	0.542053
ENSMUSG00000043415	Otud1	1409.37	-0.0256217	0.178191	0.674516	0.981835	1446.42	0.0705775	0.32737	0.732413	0.945441
ENSMUSG00000087246	Gm13346	251.201	0.00889793	0.185597	0.785453	0.991001	406.226	0.263116	0.495488	0.108068	0.452134
ENSMUSG00000036617	Etl4	3801.6	-0.173266	0.248478	0.0892592	0.531507	4819.35	0.241081	0.320513	0.2798	0.709388
ENSMUSG00000083777	Gm13361	16.2064	0.00296808	0.187905	0.726327		29.3343	0.030892	0.413104	0.44053	0.830701
ENSMUSG00000060795	Gm13363	61.023	-0.00481328	0.187329	0.771541	0.989985	54.3028	-0.0181482	0.4072	0.78672	0.957113
ENSMUSG00000082164	Gm13360	425.456	-0.0252168	0.187823	0.420266	0.920595	316.115	-0.179344	0.450809	0.142566	0.520023
ENSMUSG00000081128	Gm13328	6.68299	-0.00482723	0.188117	0.198113		6.21389	-0.0214639	0.413367	0.344724
ENSMUSG00000085477	Gm13335	277.522	-0.0218758	0.186914	0.50331	0.942627	332.458	0.0322209	0.383841	0.830862	0.967939
ENSMUSG00000036591	Arhgap21	34192.1	-0.0673591	0.150866	0.49805	0.942206	35651.1	0.213258	0.215538	0.253299	0.683325
ENSMUSG00000085206	Gm13380	43.4387	-0.0114804	0.188444	0.170129	0.716073	36.606	-0.0471767	0.41684	0.0164184	0.166505
ENSMUSG00000075514	Gm13375	408.742	-0.0144522	0.185297	0.679837	0.981835	310.614	-0.135445	0.415274	0.334567	0.761465
ENSMUSG00000086821	Gm13377	20.4169	-0.000732314	0.187847	0.915454		68.4762	0.0402067	0.413499	0.410808	0.814874
ENSMUSG00000048550	Thnsl1	372.855	0.0393198	0.190409	0.289392	0.845288	195.244	-0.0271046	0.401521	0.772425	0.954145
ENSMUSG00000084071	Gm13378	199.018	-0.00666732	0.185723	0.817483	0.992096	200.74	0.00862987	0.393711	0.950618	0.9904
ENSMUSG00000045967	Gpr158	72.7481	-0.000405163	0.187433	0.965968	0.998963	43.8144	-0.0301688	0.411492	0.550267	0.883874
ENSMUSG00000025716	Myo3a	730.421	0.0118757	0.184559	0.768747	0.989985	588.812	-0.00502324	0.37534	0.967087	0.993351
ENSMUSG00000083863	Gm13341	185.172	0.00408392	0.185753	0.895893	0.99447	168.64	0.0179704	0.394875	0.886205	0.980945
ENSMUSG00000083563	Gm13340	438.709	0.025458	0.185507	0.551112	0.955798	374.244	0.0584418	0.38246	0.711523	0.941155
ENSMUSG00000082884	Gm13339	104.741	0.0144627	0.187688	0.503578	0.942627	92.4672	0.0543184	0.407726	0.557647	0.886498
ENSMUSG00000026787	Gad2	155.109	-0.0125838	0.187658	0.514996	0.945895	170.85	-0.0269905	0.396396	0.805714	0.963031
ENSMUSG00000026786	Apbb1ip	6.65898	-0.00482693	0.188117	0.198491		5.96333	-0.0232117	0.413742	0.22015
ENSMUSG00000026784	Pdss1	119.941	0.0258836	0.189677	0.215221	0.775436	54.2924	0.0156362	0.406348	0.844248	0.971296
ENSMUSG00000081861	Gm14441	17.3133	-0.00484872	0.188121	0.115262		15.5047	-0.0234739	0.413802	0.129726
ENSMUSG00000058835	Abi1	5430.42	0.0424845	0.166567	0.587836	0.96446	5321	0.266739	0.280739	0.215502	0.6365
ENSMUSG00000083650	Gm13357	14.8207	-0.000493836	0.187868	0.935429		7.53503	-0.0233021	0.413762	0.194709
ENSMUSG00000026781	Acbd5	8643.18	0.0642738	0.162114	0.488888	0.940602	8009	0.170345	0.267555	0.414713	0.816926
ENSMUSG00000026779	Mastl	5966.75	-0.203079	0.243825	0.0828925	0.511353	6189.27	-0.0232343	0.252723	0.903625	0.98235
ENSMUSG00000026775	Yme1l1	2047.67	0.0449753	0.182133	0.489547	0.940602	1310.24	-0.300421	0.405377	0.18733	0.595854
ENSMUSG00000084098	Gm13422	15.2661	-0.0035854	0.187883	0.679028		11.1621	-0.0190364	0.412893	0.46898
ENSMUSG00000026771	Spopl	310.121	0.028838	0.187607	0.434575	0.924536	313.188	0.151103	0.417287	0.321416	0.747953
ENSMUSG00000083373	Gm13392	68.1847	0.0127983	0.187883	0.479621	0.939356	49.4213	0.0274304	0.408074	0.70814	0.940727
ENSMUSG00000026986	Hnmt	219.745	0.0255173	0.188409	0.381043	0.903972	220.4	0.116469	0.417917	0.331783	0.75875
ENSMUSG00000061809	Tbpl2	339.263	-0.0246618	0.188019	0.405803	0.917286	305.509	-0.127463	0.409933	0.372575	0.790627
ENSMUSG00000026979	Psd4	5.77111	-0.00481467	0.188116	0.214053		5.16822	-0.0231296	0.413726	0.236897
ENSMUSG00000026976	Pax8	18.5919	0.00405534	0.188001	0.557791		2.38533	-0.0225071	0.413602	0.343026
ENSMUSG00000102591	RP23-264D16.7	4164.82	0.101982	0.20959	0.161985	0.705351	3674.04	0.265624	0.380358	0.23923	0.668036
ENSMUSG00000084241	Gm13416	18.3324	-0.0035234	0.187925	0.651559		13.7259	-0.0198804	0.41305	0.426914
ENSMUSG00000004113	Cacna1b	151.955	0.0202127	0.189324	0.132061	0.649248	43.9605	0.0195404	0.409863	0.737773	0.946425
ENSMUSG00000036893	Ehmt1	1630.55	-0.043415	0.179161	0.52487	0.950451	1476.17	-0.0868137	0.343676	0.657087	0.92551
ENSMUSG00000102875	RP23-358I10.4	57.3633	-0.0153282	0.188962	0.0017054	0.0816452	86.1839	-0.0134837	0.40787	0.824083	0.96702
ENSMUSG00000026972	Arrdc1	835.267	-0.0162634	0.181292	0.74913	0.989985	686.258	-0.0798865	0.387213	0.598029	0.90338
ENSMUSG00000026974	Zmynd19	14230.9	-0.0161975	0.159987	0.845112	0.993659	13230.1	0.0298371	0.225355	0.878047	0.978694
ENSMUSG00000026975	Dph7	120.881	0.00291605	0.187417	0.864951	0.994267	209.579	0.0839862	0.417401	0.321309	0.747953
ENSMUSG00000036850	Mrpl41	182.527	0.0134435	0.187235	0.581158	0.962137	62.9943	-0.104435	0.431129	0.0402102	0.263235
ENSMUSG00000036833	Pnpla7	639.339	0.00150229	0.183707	0.980155	0.999351	402.983	-0.175243	0.434745	0.227043	0.652363
ENSMUSG00000084383	Gm13370	92.876	-0.00737034	0.187027	0.721913	0.989515	82.264	-0.0176551	0.407287	0.789871	0.957845
ENSMUSG00000083796	Gm13369	18.9418	0.00519643	0.188128	0.103979
ENSMUSG00000036813	Entpd8	48.4528	0.012767	0.188622	0.0718833	0.481448
ENSMUSG00000036805	Noxa1	3.56246	0.0049103	0.18811	0.263316
ENSMUSG00000118563		19.7423	0.00696578	0.188212	0.0598698
ENSMUSG00000087028	Gm13387	3.74533	0.0026138	0.187935	0.717145		5.14609	0.0166728	0.412358	0.598004
ENSMUSG00000078202	Nrarp	98.4875	0.00488104	0.18742	0.777373	0.990144	94.8728	0.0183424	0.408992	0.77681	0.955912
ENSMUSG00000059555	Tor4a	101.506	0.000101296	0.187282	0.99216	0.999472	79.6465	-0.0195817	0.403884	0.81223	0.963847
ENSMUSG00000013465	Nelfb	455.954	0.0394091	0.190825	0.265843	0.824284	211.571	-0.058169	0.402443	0.592201	0.901658
ENSMUSG00000064919	Gm22572	7.04916	-0.00236004	0.18793	0.724496		4.77067	-0.0230796	0.413716	0.246651
ENSMUSG00000036770	4933433C11Rik	32.5797	0.00713492	0.188042	0.456269	0.930684	19.7675	0.0168068	0.411668	0.679741
ENSMUSG00000026969	Fam166a	54.915	0.00158131	0.18727	0.935635	0.99635	63.2699	0.0202529	0.408702	0.761881	0.951786
ENSMUSG00000036752	Tubb4b	10463	0.0810449	0.173314	0.376311	0.900317	7607.64	-0.235117	0.275351	0.262157	0.692306
ENSMUSG00000006469	Slc34a3	74.2179	0.0142873	0.188834	0.00152176	0.0770232
ENSMUSG00000044628	Rnf208	4.30494	0.00495384	0.188113	0.239037
ENSMUSG00000006471	Ndor1	107.913	-0.0103975	0.187689	0.541432	0.953202	158.622	0.0278244	0.401548	0.783167	0.956869
ENSMUSG00000078201	Tmem203	40.7487	0.0052917	0.187919	0.598838	0.966583	23.7444	0.00894685	0.411142	0.836934
ENSMUSG00000048707	Tprn	1133.75	0.0220778	0.179927	0.703227	0.986726	937.073	-0.00517587	0.347923	0.972732	0.995391
ENSMUSG00000026966	Ssna1	721.839	0.0752308	0.201852	0.159388	0.702061	435.101	-0.0222116	0.372459	0.897658	0.982079
ENSMUSG00000026965	Anapc2	1572.67	0.0907828	0.203681	0.189219	0.744821	1220.32	0.100641	0.341993	0.620825	0.913609
ENSMUSG00000026961	Lrrc26	47.2905	-0.00423445	0.187828	0.673353	0.981835	37.9466	-0.0225423	0.411994	0.569501	0.890655
ENSMUSG00000026959	Grin1	9.68612	0.00513047	0.188124	0.154719
ENSMUSG00000085830	Grin1os	13.0428	-0.00486827	0.188121	0.136421		11.739	-0.0234301	0.413791	0.152435
ENSMUSG00000036646	Man1b1	383.845	0.0247467	0.186224	0.528213	0.950797	199.221	-0.126728	0.419297	0.309426	0.736322
ENSMUSG00000088171	Gm25220	6.14949	-0.00483097	0.188117	0.207125		6.90673	-0.0137403	0.412059	0.663563
ENSMUSG00000026958	Dpp7	203.334	0.0178949	0.187421	0.507048	0.942846	144.285	0.0116434	0.405172	0.895637	0.982051
ENSMUSG00000026956	Uap1l1	585.585	-0.0553976	0.195245	0.184301	0.736903	589.585	-0.116419	0.39112	0.476453	0.847415
ENSMUSG00000026955	Sapcd2	1337.09	-0.0936383	0.2086	0.146511	0.676754	882.338	-2.26997	0.668622	2.99124e-05	0.00241981
ENSMUSG00000015085	Entpd2	72.8022	0.000725089	0.187444	0.97375	0.999351	82.6	0.031645	0.40534	0.721172	0.943242
ENSMUSG00000015094	Npdc1	7.5334	-0.00427027	0.188063	0.392337		39.0795	0.0375364	0.41313	0.436064	0.828218
ENSMUSG00000026944	Abca2	300.439	-0.0179687	0.185666	0.613381	0.971463	310.257	-0.00364557	0.380958	0.972694	0.995391
ENSMUSG00000015090	Ptgds	82.2318	-0.00112073	0.187394	0.930313	0.995758	85.5453	0.00597476	0.408519	0.935509	0.987077
ENSMUSG00000015083	C8g	6.87422	-0.00451881	0.188086	0.316965		5.96333	-0.0232117	0.413742	0.22015
ENSMUSG00000015095	Fbxw5	252.117	-0.00369776	0.185246	0.901109	0.995173	369.169	0.16648	0.425641	0.278155	0.707401
ENSMUSG00000026942	Traf2	506.057	0.00932274	0.18412	0.816976	0.992096	235.967	-0.190987	0.473038	0.0356766	0.245886
ENSMUSG00000015092	Edf1	275.601	0.00510962	0.185445	0.877704	0.994267	182.435	-0.0575905	0.404086	0.577708	0.894547
ENSMUSG00000026941	Mamdc4	140.746	-0.0203461	0.189274	0.149283	0.682034	110.615	-0.142299	0.450621	0.000247281	0.012091
ENSMUSG00000029419	Gm996	211.831	-0.0084632	0.187264	0.661872	0.98002	127.158	-0.125182	0.438992	0.0385556	0.257806
ENSMUSG00000015087	Rabl6	692.99	-0.00824739	0.182544	0.848334	0.993659	692.583	0.0379078	0.366401	0.832093	0.967939
ENSMUSG00000052403	Fcnaos	8.60989	0.00507207	0.188121	0.165317
ENSMUSG00000026940	Ccdc183	15.78	-0.000770919	0.187872	0.908108		8.34867	-0.0233405	0.41377	0.184182
ENSMUSG00000062061	Obp2a	3.35164	0.00207222	0.187911	0.783483
ENSMUSG00000087612	A230005M16Rik	52.0898	0.0112659	0.188525	0.00635572	0.163806
ENSMUSG00000049086	Bmyc	16.3068	0.00560193	0.188145	0.100569
ENSMUSG00000036401	Glt6d1	3.10752	-0.00474293	0.188109	0.291589		16.8399	0.0168747	0.412319	0.61057
ENSMUSG00000023210	Lcn9	17.7573	-0.00481617	0.188119	0.113506		15.9022	-0.0234878	0.413804	0.1278
ENSMUSG00000059625	Sohlh1	27.4865	-0.00697171	0.18797	0.498828	0.942627	44.5758	0.00684266	0.409125	0.916024	0.984095
ENSMUSG00000058740	Kcnt1	6.84835	0.000484084	0.187868	0.953293		2.78289	-0.0227258	0.413638	0.319727
ENSMUSG00000026933	Camsap1	17345.6	-0.0294655	0.147742	0.7496	0.989985	15096.2	-0.110347	0.246793	0.570972	0.89146
ENSMUSG00000036352	Ubac1	943.299	-0.0570105	0.191042	0.304163	0.857	827.176	-0.213091	0.401459	0.287932	0.71794
ENSMUSG00000026932	Nacc2	757.132	-0.0494738	0.189632	0.333494	0.873024	673.113	-0.162243	0.394564	0.375004	0.792715
ENSMUSG00000087679	C330006A16Rik	700.783	-0.0375826	0.187837	0.397242	0.912918	802.133	0.0315033	0.365026	0.862239	0.9758
ENSMUSG00000087595	1810012K08Rik	2.58297	0.00483201	0.188104	0.306622
ENSMUSG00000036327	Qsox2	82.0941	0.0154998	0.188256	0.377649	0.901273	65.1289	0.0328355	0.410594	0.596569	0.903191
ENSMUSG00000048038	4932418E24Rik	30.5646	0.000726477	0.18778	0.955822	0.998605	12.7218	-0.0234391	0.413794	0.145562
ENSMUSG00000026930	Gpsm1	28.3339	0.00624507	0.187881	0.567166	0.960075	40.2338	0.0477945	0.414283	0.363585	0.785758
ENSMUSG00000075467	Dnlz	191.95	0.0236449	0.188161	0.404514	0.916593	61.1185	-0.0721954	0.42084	0.110194	0.456476
ENSMUSG00000036281	Snapc4	769.617	0.0654796	0.199127	0.15215	0.688176	444.256	-0.00109965	0.384278	0.986803	0.997734
ENSMUSG00000085767	Gm13563	3.35164	0.00207222	0.187911	0.783483		7.03467	0.0182878	0.412597	0.545018
ENSMUSG00000026927	Sdccag3	556.454	-0.0242514	0.184835	0.579941	0.961814	520.798	-0.0578347	0.373273	0.726594	0.943878
ENSMUSG00000026926	Pmpca	348.984	-0.0420838	0.191113	0.260422	0.818087	263.938	-0.208984	0.470067	0.10381	0.442525
ENSMUSG00000026925	Inpp5e	663.267	-0.0115892	0.183885	0.769222	0.989985	779.628	0.113384	0.382532	0.521336	0.870429
ENSMUSG00000026924	Sec16a	22692.5	-0.174541	0.193796	0.115858	0.609349	21636	-0.121477	0.24859	0.565586	0.889002
ENSMUSG00000086714	0610009E02Rik	2.90946	0.0048601	0.188106	0.290143		8.488	0.0245279	0.413811	0.157189
ENSMUSG00000026923	Notch1	498.758	-0.0379458	0.188113	0.384375	0.906117	452.297	-0.106083	0.393262	0.495369	0.857497
ENSMUSG00000026921	Egfl7	21.6634	0.00475501	0.188026	0.496293		9.19988	0.0120128	0.411721	0.742071
ENSMUSG00000026922	Agpat2	153.457	-0.0317992	0.191092	0.122433	0.626101	164.68	-0.0999152	0.412434	0.383979	0.799238
ENSMUSG00000036186	Fam69b	54.012	0.0126309	0.188439	0.247324	0.807851	6.23516	-0.0180891	0.412731	0.509528
ENSMUSG00000077192	Snora17	16.9456	0.00436939	0.187889	0.654129		44.834	0.0709912	0.419851	0.163657	0.558889
ENSMUSG00000015787	Abo	46.8179	-0.0153695	0.188966	0.00234758	0.0966881	94.8936	0.0115059	0.406576	0.886014	0.980945
ENSMUSG00000036160	Surf6	2286.67	0.00940976	0.173515	0.892976	0.994412	1524.81	-0.323736	0.464152	0.143608	0.521631
ENSMUSG00000015776	Med22	594.962	0.0138748	0.182872	0.765726	0.989985	766.388	0.302921	0.477441	0.14506	0.524009
ENSMUSG00000062647	Rpl7a	2582.13	0.825978	0.503314	0.00332516	0.116895	1556.26	0.0994387	0.331534	0.62579	0.914205
ENSMUSG00000065258	Gm23969	5.92293	0.00501626	0.188117	0.202679		5.65152	0.0241934	0.413766	0.196471
ENSMUSG00000015790	Surf1	162.748	-0.0240772	0.188657	0.336821	0.874672	181.374	-0.0347537	0.395646	0.762636	0.951849
ENSMUSG00000014873	Surf2	179.128	-0.00032038	0.186081	0.99822	0.999472	89.4622	-0.0797326	0.421472	0.159478	0.552601
ENSMUSG00000014867	Surf4	6283.38	0.041071	0.16626	0.644873	0.977525	6080.53	0.220612	0.278958	0.301376	0.729926
ENSMUSG00000052406	Rexo4	675.675	0.0418332	0.187971	0.387762	0.907893	380.158	-0.134336	0.40483	0.388257	0.801533
ENSMUSG00000014852	Adamts13	16.8748	-0.00644605	0.188168	0.191704		20.8136	-0.0130474	0.411192	0.740089
ENSMUSG00000015488	Cacfd1	224.659	0.0198258	0.18687	0.535509	0.953202	283.691	0.130661	0.424243	0.277259	0.706769
ENSMUSG00000036067	Slc2a6	55.3686	-0.00277774	0.187595	0.822497	0.992863	31.8523	-0.0372328	0.414542	0.258389	0.688296
ENSMUSG00000083335	Gm13397	79.4691	0.00867035	0.187917	0.518091	0.948416	29.7327	-0.00655065	0.410174	0.875929	0.978054
ENSMUSG00000085008	Dbhos	117.003	0.00501232	0.186619	0.842125	0.993659	92.8449	-0.00154868	0.401382	0.977378	0.995989
ENSMUSG00000000889	Dbh	177.448	-0.0158208	0.186863	0.569302	0.961182	231.435	0.0499129	0.39335	0.70878	0.940792
ENSMUSG00000009614	Sardh	519.25	-0.0297351	0.188247	0.384342	0.906117	373.037	-0.356659	0.609002	0.0412498	0.265658
ENSMUSG00000009621	Vav2	668.131	-0.0378691	0.189147	0.356562	0.885939	825.633	0.0682904	0.355796	0.720173	0.942965
ENSMUSG00000076364	Gm24049	13.0477	0.00405967	0.188008	0.541372		4.25636	0.00670396	0.411324	0.861693
ENSMUSG00000109946		27.9573	-0.00922676	0.188364	0.0231415	0.298422	25.1596	-0.035141	0.415039	0.0470936
ENSMUSG00000026918	Brd3	2197.16	-0.0534417	0.179552	0.464213	0.934302	1922	-0.131038	0.354034	0.510286	0.864545
ENSMUSG00000026917	Wdr5	7203.24	0.0526481	0.161968	0.559141	0.956242	6685.42	0.168265	0.254912	0.410202	0.814397
ENSMUSG00000080538	Gm25541	562.016	0.0630216	0.199582	0.115184	0.60752	367.114	0.0977418	0.395247	0.519982	0.869763
ENSMUSG00000085929	Gm13421	92.3693	-0.00840116	0.187208	0.672262	0.981835	52.2775	-0.0778385	0.423534	0.0176485	0.173775
ENSMUSG00000015846	Rxra	977.521	0.0155637	0.179891	0.782332	0.990901	729.098	-0.108286	0.366919	0.559335	0.886522
ENSMUSG00000026837	Col5a1	33.0662	-0.00866716	0.188318	0.0542629	0.4202	29.4191	-0.0291493	0.414351	0.0600836	0.321117
ENSMUSG00000086425	F730016J06Rik	270.699	-0.00223406	0.185614	0.925161	0.995492	267.379	0.0184046	0.390358	0.894254	0.981672
ENSMUSG00000026833	Olfm1	871.985	0.0337889	0.18534	0.496298	0.942206	945.152	0.30159	0.451076	0.171734	0.572414
ENSMUSG00000035829	Ppp1r26	135.99	-0.00929623	0.187144	0.657407	0.978535	161.402	0.0139371	0.398275	0.904596	0.982521
ENSMUSG00000026831	1700007K13Rik	12.9148	0.00514197	0.188125	0.131022
ENSMUSG00000035772	Mrps2	686.648	-0.023273	0.185981	0.540635	0.953202	799.022	0.0712	0.356043	0.706994	0.94063
ENSMUSG00000082895	Rpsa-ps9	6.61623	0.00131449	0.187882	0.874434		3.5985	-0.00517675	0.411288	0.880097
ENSMUSG00000026829	Gbgt1	24.2618	0.00754177	0.188246	0.0431641
ENSMUSG00000063611	Gm10134	4.91959	-0.00480068	0.188114	0.232555		4.43237	-0.0230604	0.413709	0.255991
ENSMUSG00000026821	Ralgds	2543	0.0561484	0.178162	0.474287	0.937154	2291.6	0.134225	0.313399	0.519779	0.869763
ENSMUSG00000087667	Gm13381	2.66359	-0.00472337	0.188106	0.313555		2.38533	-0.0225071	0.413602	0.343026
ENSMUSG00000026816	Gtf3c5	2768.4	0.113393	0.208176	0.200683	0.758224	1457.88	-0.574503	0.64008	0.0432007	0.272979
ENSMUSG00000026812	Tsc1	4445.7	0.0654266	0.176751	0.490046	0.940602	3292.19	-0.182974	0.298066	0.389975	0.802769
ENSMUSG00000026807	Ak8	47.9188	0.00248558	0.187732	0.837679	0.993242	16.6973	-0.0235051	0.413807	0.124152
ENSMUSG00000035666	Gtf3c4	1252.14	0.0436252	0.185601	0.438533	0.925622	757.806	-0.193614	0.407336	0.303908	0.731518
ENSMUSG00000026806	Ddx31	639.102	-0.0488521	0.190288	0.31459	0.863727	458.627	-0.478683	0.734118	0.0375139	0.252899
ENSMUSG00000026805	Barhl1	168.185	-0.0221602	0.189513	0.142282	0.668438	138.658	-0.116786	0.435773	0.0357217	0.245886
ENSMUSG00000079502	1700101E01Rik	47.7978	0.00417697	0.187808	0.710611	0.987738	17.1356	-0.0121374	0.41184	0.708701
ENSMUSG00000083773	Gm13394	92.6485	0.00847513	0.187106	0.698929	0.985411	173.139	0.135962	0.435194	0.165849	0.562656
ENSMUSG00000026803	Ttf1	701.447	-0.0268754	0.185973	0.511835	0.9443	447.693	-1.31324	1.35918	0.00769989	0.107936
ENSMUSG00000082788	Gm13396	9.47088	0.00508295	0.188122	0.1567
ENSMUSG00000043535	Setx	16696.1	0.0169164	0.148029	0.855595	0.994267	14491.5	-0.0338653	0.240684	0.850946	0.972494
ENSMUSG00000035513	Ntng2	2.88556	-0.00473271	0.188108	0.302015		127.37	0.086781	0.425996	0.021003	0.190851
ENSMUSG00000079499	6530402F18Rik	12.4301	-0.00477492	0.188117	0.140268		33.8905	0.0129665	0.410857	0.784489	0.956869
ENSMUSG00000026799	Med27	5672.32	-0.192767	0.25693	0.0816978	0.507462	5684.29	-0.129626	0.26092	0.534032	0.875986
ENSMUSG00000086994	Gm13402	5.77111	-0.00481467	0.188116	0.214053		5.16822	-0.0231296	0.413726	0.236897
ENSMUSG00000039844	Rapgef1	2027.14	-0.0308832	0.176296	0.645611	0.977525	1968.72	0.0122072	0.312846	0.958085	0.991609
ENSMUSG00000075425	Gm13547	9.10124	0.00454876	0.188069	0.376652
ENSMUSG00000039826	Trub2	579.111	0.00430226	0.181622	0.932898	0.995758	306.702	-0.386112	0.668751	0.0260936	0.211387
ENSMUSG00000026798	Coq4	253.003	-0.0614495	0.201153	0.0402389	0.371321	189.116	-0.21012	0.497173	0.000643156	0.0237565
ENSMUSG00000059316	Slc27a4	265.445	-0.00767536	0.185224	0.810719	0.991941	194.357	-0.0943125	0.408159	0.433004	0.826596
ENSMUSG00000069020	Urm1	144.334	-0.00459525	0.186404	0.846582	0.993659	94.8938	-0.0688214	0.413216	0.396817	0.806575
ENSMUSG00000039787	Cercam	53.2538	-7.04419e-05	0.187544	0.983161	0.999472	47.837	-0.000464808	0.407388	0.982562	0.997079
ENSMUSG00000026790	Odf2	14167.4	-0.125903	0.180552	0.218712	0.779808	14946.5	0.115703	0.233702	0.538937	0.878701
ENSMUSG00000019715	Gle1	6022.95	-0.164008	0.231097	0.121475	0.624239	5428.02	-0.290516	0.317652	0.192987	0.605177
ENSMUSG00000057738	Sptan1	11058.8	-0.209219	0.230376	0.0798948	0.504529	10546.9	-0.179292	0.241477	0.359702	0.782244
ENSMUSG00000039715	Wdr34	86.7723	-0.00996869	0.187561	0.57789	0.961814	176.091	0.109021	0.416082	0.351554	0.775467
ENSMUSG00000054766	Set	7086.59	0.082222	0.175168	0.374512	0.898915	4692.19	-0.43202	0.361064	0.0794489	0.378667
ENSMUSG00000026785	Pkn3	151.748	0.0299548	0.190902	0.104363	0.57974	34.8222	-0.00707026	0.408909	0.88931	0.981426
ENSMUSG00000015335	Zdhhc12	52.0913	0.00911632	0.188103	0.410494	0.91829	14.217	-0.00218583	0.411128	0.939805
ENSMUSG00000039686	Zer1	144.767	0.0174425	0.188613	0.295992	0.852415	91.26	0.034572	0.410181	0.601134	0.905145
ENSMUSG00000039678	Tbc1d13	2807.8	0.00866585	0.167353	0.916016	0.995246	2820.09	0.184854	0.306812	0.393973	0.804767
ENSMUSG00000085401	Slc39a1-ps	34.3393	0.0114403	0.18852	0.0489391	0.402376
ENSMUSG00000015337	Endog	71.0793	0.00917138	0.187879	0.52454	0.950145	75.0792	0.0329745	0.411795	0.541402	0.879704
ENSMUSG00000039660	D2Wsu81e	196.397	-0.0183627	0.187397	0.492486	0.940958	146.494	-0.0691094	0.414679	0.359177	0.782074
ENSMUSG00000039648	Ccbl1	106.688	-0.0143377	0.18832	0.335037	0.873811	76.4319	-0.106936	0.433898	0.000249422	0.0121235
ENSMUSG00000100747	1700084E18Rik	105.612	0.00913327	0.187712	0.578476	0.961814	51.6779	-0.00503334	0.409632	0.906967	0.983093
ENSMUSG00000007476	Lrrc8a	351.785	0.024037	0.18627	0.5312	0.951978	206.802	-0.0729568	0.399321	0.561144	0.886957
ENSMUSG00000075419	Dolk	156.348	-0.0133483	0.186817	0.610294	0.97013	183.679	0.015036	0.397811	0.898226	0.982079
ENSMUSG00000052533	Nup188	2151.5	-0.0446845	0.183924	0.461249	0.933613	1866.69	-0.213878	0.35943	0.322657	0.748931
ENSMUSG00000084892	Gm14471	23.1091	-0.00781154	0.188269	0.0404603		20.7457	-0.0296795	0.414398	0.0751219
ENSMUSG00000026860	Sh3glb2	227.57	0.00189486	0.186196	0.95041	0.997934	265.674	0.0633646	0.402392	0.587906	0.899798
ENSMUSG00000026858	Fam73b	159.865	-0.01668	0.187236	0.524769	0.950444	101.146	-0.145095	0.446277	0.0569135	0.311678
ENSMUSG00000026856	Dolpp1	142.736	0.00910258	0.187528	0.621797	0.972654	88.7079	0.00232232	0.406777	0.986322	0.997497
ENSMUSG00000026853	Crat	412.484	0.0816916	0.210549	0.0506981	0.405875	348.776	0.253602	0.483447	0.126525	0.491878
ENSMUSG00000039515	Ppp2r4	710.754	0.0717881	0.201139	0.150993	0.684697	498.421	0.0884539	0.378193	0.615676	0.911592
ENSMUSG00000089762	Ier5l	2609.67	0.146313	0.24766	0.0781891	0.498124	1279.71	-0.38226	0.499505	0.107307	0.450305
ENSMUSG00000026857	Ntmt1	898.852	-0.0236999	0.181085	0.662039	0.98002	600.957	-0.444834	0.628681	0.0579676	0.314203
ENSMUSG00000039483	Asb6	170.135	0.0186438	0.187423	0.500787	0.942627	75.9084	-0.0448014	0.410211	0.525662	0.872311
ENSMUSG00000050737	Ptges	96.8012	0.0134763	0.188088	0.422157	0.921079	21.7421	-0.0302664	0.414462	0.0701574
ENSMUSG00000084143	Gm13400	3.25711	0.000505985	0.187873	0.953998
ENSMUSG00000026848	Tor1b	1178.1	0.0203355	0.179854	0.724304	0.989515	677.202	-0.306753	0.515633	0.101072	0.436113
ENSMUSG00000026849	Tor1a	4575.05	-0.3388	0.355287	0.0253677	0.310699	4763.97	-0.111376	0.26728	0.584863	0.897759
ENSMUSG00000026851	BC005624	271.636	0.0157458	0.18672	0.595245	0.965749	401.028	0.281198	0.513222	0.0904246	0.407345
ENSMUSG00000026854	Usp20	646.372	0.0810524	0.206482	0.1146	0.606534	280.944	-0.129969	0.413736	0.347843	0.772467
ENSMUSG00000075415	Fnbp1	393.832	-0.0199545	0.185172	0.60931	0.969996	454.825	0.0618134	0.375486	0.714163	0.94164
ENSMUSG00000000194	Gpr107	316.303	2.86878e-05	0.185115	0.993251	0.999472	288.238	0.00348875	0.394833	0.985199	0.997497
ENSMUSG00000062661	Ncs1	56.9231	-0.00627278	0.18773	0.631252	0.973844	74.7858	0.00637644	0.404489	0.948069	0.99016
ENSMUSG00000055632	Hmcn2	73.3073	0.00775532	0.187669	0.622375	0.972654	32.3575	-0.015213	0.409739	0.766897	0.952734
ENSMUSG00000076441	Ass1	18.1104	0.00619782	0.188173	0.0792333		15.0289	0.0249369	0.413862	0.112245
ENSMUSG00000084226	Gm13426	19.533	-0.00487332	0.188122	0.107085		17.4924	-0.0235106	0.413808	0.12075
ENSMUSG00000026843	Fubp3	815.891	-0.0851151	0.206457	0.135386	0.655441	863.267	-0.0838388	0.359111	0.649199	0.922717
ENSMUSG00000085224	Gm13425	35.3805	0.0128258	0.188652	0.036799	0.355244	41.8992	0.0456537	0.416397	0.0548993	0.307096
ENSMUSG00000079466	Prdm12	135.646	0.0146442	0.188627	0.2114	0.770332	44.2902	0.0220915	0.410119	0.702154	0.93948
ENSMUSG00000039356	Exosc2	357.482	0.0282679	0.186941	0.472825	0.937146	386.525	0.195492	0.432136	0.246088	0.676257
ENSMUSG00000087549	Gm13427	26.8176	-0.00857188	0.188318	0.0285675	0.323595	29.8394	-0.0253476	0.412072	0.543072	0.880541
ENSMUSG00000026842	Abl1	1711.69	0.00307265	0.17531	0.964411	0.998605	1398.92	-0.102041	0.332176	0.614574	0.91102
ENSMUSG00000026841	Fibcd1	22.1966	-0.00545176	0.188145	0.0838806		86.1466	0.0347602	0.411708	0.537596	0.878244
ENSMUSG00000026840	Lamc3	124.209	0.00115055	0.187	0.963796	0.998605	54.6773	-0.0855602	0.425954	0.00962676	0.121848
ENSMUSG00000001864	Aif1l	109.899	-0.0243401	0.189298	0.245039	0.805468	86.6901	-0.0733445	0.419275	0.208174	0.625107
ENSMUSG00000085737	Gm13442	5.16593	0.00499063	0.188116	0.217695
ENSMUSG00000001855	Nup214	40185.3	-0.0010037	0.141921	0.981947	0.999472	35122.4	-0.0635804	0.207024	0.719608	0.942965
ENSMUSG00000081480	Gm13608	68.7836	0.00950069	0.187977	0.480145	0.939356	18.3283	-0.0128674	0.411929	0.688405
ENSMUSG00000050592	Fam78a	32.7338	0.00602124	0.187925	0.56888	0.960846	6.64856	-0.023256	0.413752	0.208081
ENSMUSG00000051373	Ppapdc3	30.1014	0.00371215	0.187787	0.743761	0.989985	8.86475	-0.0233557	0.413774	0.178308
ENSMUSG00000039262	Prrc2b	305.694	-0.00998514	0.184809	0.775233	0.989985	432.02	0.18519	0.420563	0.28625	0.716701
ENSMUSG00000094382	Gm22192	4.7265	0.00405078	0.18803	0.486803		5.47292	0.0206793	0.413037	0.434561
ENSMUSG00000094251	Gm25632	4.7265	0.00405078	0.18803	0.486803		2.98185	0.0172256	0.412483	0.567283
ENSMUSG00000086216	Gm13610	17.2803	-0.00318004	0.187972	0.621882		12.8539	-0.0234392	0.413794	0.144729
ENSMUSG00000039254	Pomt1	132.211	-0.0408525	0.194465	0.00496637	0.142658	304.775	0.114366	0.401915	0.447249	0.832237
ENSMUSG00000002550	Uck1	27.6855	-0.00216956	0.18784	0.784543	0.991001	45.8443	0.0127433	0.4102	0.81231	0.963847
ENSMUSG00000066068	Gm13611	8.22642	0.00319641	0.187964	0.648044		2.85094	0.00076714	0.411167	0.989207
ENSMUSG00000044627	Swi5	1722.47	-0.0248898	0.176575	0.701106	0.986056	2958.13	1.13588	0.450096	0.00100776	0.0320958
ENSMUSG00000002546	Golga2	4945.73	-0.0358671	0.166641	0.679744	0.981835	5913.78	0.417841	0.334666	0.0820201	0.386881
ENSMUSG00000026825	Dnm1	14.1521	-0.00364353	0.18801	0.536218		19.8335	-0.00219812	0.411121	0.937742
ENSMUSG00000039205	Ciz1	34.9408	-0.0111516	0.18852	0.0106252	0.218805	75.6355	0.0138929	0.407811	0.846609	0.971634
ENSMUSG00000039195	1110008P14Rik	82.7428	0.0110109	0.188158	0.389226	0.90877	38.0914	0.0181452	0.409056	0.77454	0.955022
ENSMUSG00000026822	Lcn2	3.10752	-0.00474293	0.188109	0.291589		79.5214	0.0631396	0.419321	0.0852397	0.395259
ENSMUSG00000026820	Ptges2	217.201	0.0257034	0.18894	0.323428	0.86902	84.7693	-0.0434257	0.407816	0.58921	0.900227
ENSMUSG00000026819	Slc25a25	1847.66	0.102076	0.20593	0.185924	0.739733	1098.44	-0.168252	0.391458	0.370387	0.7898
ENSMUSG00000039164	Naif1	686.262	-0.0737582	0.201245	0.157622	0.698457	589.604	-0.304677	0.481999	0.136642	0.511446
ENSMUSG00000103175	RP23-255P20.8	18.5195	0.00661742	0.188171	0.196459
ENSMUSG00000039157	Fam102a	2039.04	-0.027915	0.175424	0.697581	0.98522	1806.06	-0.0929036	0.315007	0.644757	0.920466
ENSMUSG00000026810	Dpm2	240.646	-0.00483416	0.185592	0.866033	0.994267	235.689	0.00845188	0.391023	0.954614	0.990851
ENSMUSG00000046854	Pip5kl1	53.3134	0.00761887	0.187666	0.628401	0.973271	15.3355	-0.0234669	0.413801	0.130571
ENSMUSG00000079442	St6galnac4	69.171	-0.00459509	0.187395	0.770427	0.989985	81.8889	0.0124643	0.403049	0.898004	0.982079
ENSMUSG00000026811	St6galnac6	109.712	-0.0146337	0.188127	0.396118	0.912033	92.3759	-0.0784892	0.417242	0.301411	0.729926
ENSMUSG00000026814	Eng	11.807	-0.00486583	0.18812	0.144534		30.1323	0.0133681	0.410316	0.798023	0.959789
ENSMUSG00000009566	Fpgs	2757.85	-0.0941241	0.196464	0.238121	0.800037	2421.84	-0.284721	0.352135	0.218755	0.641904
ENSMUSG00000009555	Cdk9	2708.63	0.036405	0.17344	0.628127	0.973264	1442.27	-1.57416	0.584253	0.000381838	0.0165085
ENSMUSG00000059013	Sh2d3c	1921.85	-0.0667188	0.188379	0.336593	0.874672	1427.1	-0.756575	0.560433	0.0196282	0.184164
ENSMUSG00000009551	6330409D20Rik	42.9575	0.0133465	0.188728	0.00448674	0.133207	10.0407	0.0246513	0.413827	0.142778
ENSMUSG00000039021	Ttc16	103.861	0.00797326	0.187214	0.700659	0.986056	42.3156	-0.0508696	0.414676	0.333556	0.760424
ENSMUSG00000009563	Tor2a	361.731	-0.0733637	0.206252	0.048483	0.401334	442.763	-0.0409631	0.39178	0.74609	0.948352
ENSMUSG00000053746	Ptrh1	107.832	0.0002964	0.186706	0.998475	0.999472	90.5537	-0.00753768	0.403759	0.918938	0.984362
ENSMUSG00000038987	1700019L03Rik	148.724	0.00905962	0.186451	0.740333	0.989985	85.0114	-0.0289551	0.408596	0.663177	0.926474
ENSMUSG00000026797	Stxbp1	1950.82	-0.109357	0.20899	0.17015	0.716073	2548.95	0.262542	0.351927	0.249846	0.679815
ENSMUSG00000064652	Gm24165	3.56246	0.0049103	0.18811	0.263316
ENSMUSG00000085397	Gm13524	28.9323	0.00201962	0.187819	0.844323	0.993659	13.7675	-0.00931887	0.411551	0.779496
ENSMUSG00000026796	Fam129b	3.10752	-0.00474293	0.188109	0.291589		6.64022	0.00436392	0.411186	0.918122
ENSMUSG00000026792	Lrsam1	275.268	-0.00648929	0.185447	0.8301	0.992863	154.13	-0.142432	0.442223	0.0952595	0.420812
ENSMUSG00000038900	Rpl12	1437.91	0.146535	0.259087	0.0466236	0.395891	801.62	-0.038853	0.354434	0.827219	0.967386
ENSMUSG00000026791	Slc2a8	245.601	-0.0130081	0.186648	0.636081	0.975425	247.096	-0.0176771	0.394311	0.870807	0.977688
ENSMUSG00000038860	Garnl3	1317.93	-0.0745209	0.197847	0.216776	0.777671	1445.33	-0.00460252	0.36865	0.970364	0.994565
ENSMUSG00000104277	RP23-365F1.5	41.0361	0.00714964	0.188084	0.414125	0.918621	16.9245	0.0109184	0.411581	0.775621
ENSMUSG00000038831	Ralgps1	1682.59	-0.0807524	0.193859	0.265616	0.824267	1645.89	-0.0772434	0.332889	0.697147	0.937697
ENSMUSG00000004105	Angptl2	1377.23	0.0202586	0.176482	0.754057	0.989985	1660.84	0.48775	0.451826	0.0679644	0.345648
ENSMUSG00000068966	Zbtb34	1879.82	0.0894135	0.2012	0.210285	0.769854	1563.45	0.162497	0.345546	0.442074	0.830988
ENSMUSG00000026788	Zbtb43	618.926	-0.0274438	0.184815	0.529431	0.950797	559.221	-0.0780319	0.382087	0.622273	0.914205
ENSMUSG00000038765	Lmx1b	466.413	0.0389582	0.189121	0.351479	0.884538	422.498	0.0503198	0.404459	0.624837	0.914205
ENSMUSG00000052951	C130021I20Rik	48.1393	0.00988646	0.187975	0.47582	0.937154	11.5792	-0.0176804	0.412649	0.530795
ENSMUSG00000038740	Mvb12b	5472.06	-0.0217765	0.16635	0.775707	0.989985	5062.23	-0.00504159	0.272614	0.975527	0.995935
ENSMUSG00000087461	C230014O12Rik	6.02225	0.000957481	0.187875	0.90785
ENSMUSG00000103413	RP23-241O13.3	30.6313	-0.00706357	0.188225	0.0392254	0.366578	50.1903	-0.00320997	0.409623	0.934888	0.987077
ENSMUSG00000038718	Pbx3	472.407	0.0208347	0.184673	0.626283	0.972797	473.8	0.11959	0.395912	0.46246	0.83846
ENSMUSG00000038696	Mapkap1	5354.91	-0.0711548	0.174451	0.410089	0.91829	5974.12	0.217525	0.291403	0.316591	0.74252
ENSMUSG00000083503	Gm13407	5.54915	-0.00481204	0.188115	0.218469		4.96945	-0.0231039	0.413721	0.241641
ENSMUSG00000081992	Gm13408	12.516	0.000249285	0.187814	0.990533		6.99317	-0.0132607	0.412	0.676339
ENSMUSG00000087635	Gm13414	83.5285	0.00594944	0.187055	0.779957	0.990508	54.2624	-0.0145454	0.406171	0.835985	0.968741
ENSMUSG00000026867	Gapvd1	1707.55	-0.0291239	0.175368	0.669011	0.981552	1580.69	-0.0323301	0.332641	0.865356	0.976437
ENSMUSG00000026864	Hspa5	13560.3	0.854501	0.304071	0.000251789	0.0263934	6294.61	-0.560045	0.391703	0.0356057	0.245681
ENSMUSG00000070953	Rabepk	174.027	0.00415298	0.185963	0.889825	0.994267	148.355	0.00331174	0.397595	0.985352	0.997497
ENSMUSG00000035949	Fbxw2	727.626	-0.0673716	0.198588	0.174188	0.721127	615.71	-0.3432	0.513156	0.107159	0.449798
ENSMUSG00000081904	Gm13419	11.9088	-0.00422754	0.188067	0.359982		10.1945	-0.0233933	0.413783	0.165051
ENSMUSG00000107167		4.81606	-0.00042748	0.18787	0.94753		3.05472	-0.0127007	0.411957	0.691483
ENSMUSG00000026869	Psmd5	2845.58	0.0365557	0.179665	0.577895	0.961814	2429.05	0.0581827	0.312196	0.781891	0.956869
ENSMUSG00000026873	Phf19	25.1162	0.000480065	0.18781	0.9733		24.2316	0.00495067	0.410273	0.928952
ENSMUSG00000026875	Traf1	231.732	-0.0440404	0.193598	0.131065	0.646819	268.742	-0.0658163	0.392183	0.630955	0.915641
ENSMUSG00000026874	Hc	117.784	0.0187637	0.188728	0.28483	0.841098	50.8077	0.00824873	0.408984	0.898965	0.982079
ENSMUSG00000085599	Gm13449	27.3122	0.00677068	0.188203	0.0497492	0.40287
ENSMUSG00000057110	Cntrl	1905.01	-0.0627307	0.183694	0.39047	0.909891	1744.49	-0.129552	0.324057	0.531554	0.874847
ENSMUSG00000026878	Rab14	14988.6	-0.176714	0.197664	0.116434	0.610277	16328	0.146102	0.230745	0.447942	0.83287
ENSMUSG00000026879	Gsn	25.8911	0.00723113	0.18821	0.143861	0.670952
ENSMUSG00000026880	Stom	705.392	0.0343979	0.187183	0.435687	0.924536	642.504	0.164459	0.392114	0.383321	0.798912
ENSMUSG00000035778	Ggta1	1569.11	0.0338817	0.178392	0.605043	0.968718	1589.65	0.254	0.365158	0.262254	0.692306
ENSMUSG00000026883	Dab2ip	146.777	0.0176259	0.187542	0.495606	0.941568	45.8596	-0.0640233	0.420259	0.00486797	0.0835694
ENSMUSG00000026885	Ttll11	787.072	0.0385178	0.185169	0.470738	0.936285	908.57	0.404597	0.507334	0.0987793	0.430235
ENSMUSG00000026895	Ndufa8	92.5681	-0.0162292	0.188257	0.368725	0.894479	146.937	0.032693	0.399844	0.766937	0.952734
ENSMUSG00000026894	Morn5	13.7749	-0.0048676	0.188121	0.132131		12.4106	-0.0234415	0.413793	0.147676
ENSMUSG00000107351		23.1221	-0.00556471	0.18815	0.077334		20.8322	-0.0235264	0.413813	0.108636
ENSMUSG00000026890	Lhx6	69.9519	0.00412832	0.187536	0.788601	0.991121	72.6479	0.0403977	0.407675	0.625171	0.914205
ENSMUSG00000026889	Rbm18	3221.4	1.25962	0.368681	2.80831e-05	0.00575497	3662.61	1.69552	0.44979	1.09734e-05	0.00104815
ENSMUSG00000026887	Mrrf	321.459	0.0400963	0.190603	0.282781	0.840985	571.448	1.68203	0.910725	0.00237669	0.0553068
ENSMUSG00000047250	Ptgs1	4.88325	-0.00480136	0.188114	0.233321		4.37311	-0.0230567	0.413708	0.257572
ENSMUSG00000083716	Gm13436	13.7977	0.00185258	0.187823	0.852472		17.0757	0.0164165	0.411272	0.711198
ENSMUSG00000075378	Olfr361	8.58143	-0.000451469	0.187869	0.942323		5.07865	-0.0157294	0.412348	0.600339
ENSMUSG00000064626	Gm22306	16.9675	0.00515548	0.187957	0.568506		12.6134	0.0151717	0.411735	0.693702
ENSMUSG00000009030	Pdcl	1146.02	0.050801	0.187238	0.388345	0.908161	816.412	-0.0364297	0.360975	0.831818	0.967939
ENSMUSG00000075376	Rc3h2	1711.13	0.0588882	0.18816	0.355737	0.885939	1122.66	-0.11715	0.369526	0.527448	0.873055
ENSMUSG00000066798	Zbtb6	351.493	0.0186632	0.186923	0.544034	0.953377	360.354	0.118677	0.411372	0.387381	0.8009
ENSMUSG00000050714	Zbtb26	356.423	-0.00598505	0.185963	0.825195	0.992863	488.055	0.161092	0.410981	0.338505	0.763768
ENSMUSG00000035437	Rabgap1	2406.23	0.179386	0.270084	0.0689592	0.472809	2334.35	0.575455	0.423552	0.0372873	0.251787
ENSMUSG00000026915	Strbp	9037.32	-0.0302577	0.156088	0.813473	0.992096	10164.1	0.394915	0.277824	0.0692159	0.349461
ENSMUSG00000053164	Gpr21	100.859	0.0288836	0.190827	0.0815584	0.507462	49.1592	0.0347371	0.411977	0.521035	0.870225
ENSMUSG00000108226		2.58297	0.00483201	0.188104	0.306622
ENSMUSG00000092958	Mir5128	11.561	-0.00485835	0.18812	0.146295		10.8715	-0.0213595	0.413344	0.340087
ENSMUSG00000035403	Crb2	24.7403	-0.00904086	0.188329	0.0956329		70.7312	0.0428455	0.409159	0.581301	0.895936
ENSMUSG00000035392	Dennd1a	6314.58	0.0321563	0.159249	0.714833	0.988974	5806.77	0.100325	0.272316	0.630534	0.915641
ENSMUSG00000087294	Gm13556	52.8432	0.0112424	0.188523	0.00631651	0.163548
ENSMUSG00000000247	Lhx2	475.119	0.0467187	0.192258	0.242662	0.803307	346.89	0.0846969	0.388909	0.587193	0.899234
ENSMUSG00000026749	Nek6	46.5888	0.010334	0.187981	0.469284	0.935993	33.2993	0.0239808	0.410248	0.677503	0.930407
ENSMUSG00000107535		16908.6	0.00774612	0.151208	0.948527	0.99784	16488.5	0.130817	0.268577	0.529176	0.873641
ENSMUSG00000026750	Psmb7	563.353	0.0255751	0.184253	0.588265	0.964617	320.098	-0.173731	0.42853	0.255463	0.685298
ENSMUSG00000095278	Gm27634	26.9059	0.00674726	0.188201	0.05066	0.405763
ENSMUSG00000083722	Gpr144-ps	157.028	-0.00126499	0.186696	0.94465	0.99729	104.901	-0.0384085	0.409169	0.585872	0.898552
ENSMUSG00000026751	Nr5a1	11.4616	-0.00260474	0.187941	0.698655		7.95111	-0.0233212	0.413766	0.189107
ENSMUSG00000063972	Nr6a1	16842.1	-0.170323	0.196335	0.122418	0.626101	17745.8	0.0809506	0.225432	0.670024	0.92844
ENSMUSG00000046618	Olfml2a	61.1051	-0.0150418	0.188686	0.183852	0.736109	66.1807	-0.0382577	0.410828	0.536295	0.877219
ENSMUSG00000084184	Gm13474	18.8161	0.00312792	0.187878	0.735529		27.2999	0.0205595	0.41223	0.58734
ENSMUSG00000085755	Gm13496	12.7061	-0.00302918	0.187965	0.643449		9.30798	-0.0233767	0.413778	0.173592
ENSMUSG00000035295	Wdr38	11.6233	0.00512658	0.188124	0.13935
ENSMUSG00000062997	Rpl35	538.187	0.0349619	0.186576	0.454051	0.930519	463.29	0.0857505	0.381447	0.608099	0.908616
ENSMUSG00000026755	Arpc5l	2646.89	0.155689	0.240756	0.0990966	0.564481	2281.84	0.277929	0.343642	0.224107	0.648784
ENSMUSG00000026754	Golga1	165.151	-0.00662101	0.186742	0.767402	0.989985	175.398	0.00662721	0.398621	0.958941	0.991781
ENSMUSG00000035236	Scai	810.855	0.00630867	0.181044	0.903927	0.995192	894.164	0.175012	0.388789	0.370871	0.7898
ENSMUSG00000107833		4.66128	-0.00479661	0.188114	0.238902		44.3372	0.0364588	0.414063	0.337192	0.762924
ENSMUSG00000082315	Gm16523	26.3127	-0.00884991	0.188337	0.0270186	0.319958	94.5744	0.0463748	0.411631	0.495738	0.857635
ENSMUSG00000107955		30.7393	-0.00212329	0.187816	0.80859	0.991606	52.0835	0.0199554	0.409546	0.742949	0.947729
ENSMUSG00000026753	Ppp6c	498.894	0.0227503	0.18424	0.617264	0.971707	436.144	0.058079	0.377073	0.7261	0.943878
ENSMUSG00000107699		33.1929	-0.00218723	0.187713	0.83444	0.993242	66.1325	0.0489753	0.41075	0.513723	0.866735
ENSMUSG00000083240	Gm13453	10.222	0.000601782	0.187867	0.951715		9.70961	0.00394029	0.411158	0.927973
ENSMUSG00000082536	Gm13456	178.659	0.012508	0.186714	0.648051	0.97766	169.205	0.0479336	0.403212	0.646315	0.921024
ENSMUSG00000049252	Lrp1b	876.713	0.0517117	0.19017	0.326598	0.870573	749.96	0.147214	0.375931	0.448884	0.833396
ENSMUSG00000081999	Gm13461	134.962	0.0202513	0.188122	0.410554	0.91829	69.187	-0.0106958	0.404262	0.887648	0.981218
ENSMUSG00000026866	Kynu	61.2848	0.00339578	0.187558	0.820739	0.992863	39.5572	-0.00534005	0.409179	0.909342	0.983288
ENSMUSG00000049744	Arhgap15	276.262	0.0283874	0.188021	0.410388	0.91829	151.502	-0.0392726	0.400087	0.707479	0.94063
ENSMUSG00000036890	Gtdc1	1854.98	-0.0160696	0.174309	0.807434	0.991606	2205.48	0.30136	0.381082	0.19226	0.604063
ENSMUSG00000083849	Gm13477	22.3138	-0.00757267	0.188213	0.199297		19.2197	-0.026575	0.414084	0.0948665
ENSMUSG00000026872	Zeb2	14.0128	0.00516592	0.188126	0.124887
ENSMUSG00000085591	Gm13479	4.88325	-0.00480136	0.188114	0.233321		4.37311	-0.0230567	0.413708	0.257572
ENSMUSG00000086710	Gm13465	599.906	-0.0491182	0.190351	0.313848	0.863098	737.607	0.0741547	0.363924	0.687987	0.933848
ENSMUSG00000092853	Gm25959	22.4658	-0.00294767	0.18791	0.698862		16.1112	-0.020435	0.413156	0.396365
ENSMUSG00000086353	Gm13481	17.3133	-0.00484872	0.188121	0.115262		15.5047	-0.0234739	0.413802	0.129726
ENSMUSG00000052155	Acvr2a	273.784	-0.0223791	0.187888	0.42215	0.921079	292.869	-0.0425331	0.386051	0.759322	0.950212
ENSMUSG00000026761	Orc4	1888.52	0.00535453	0.173637	0.94036	0.99729	1597.33	-0.0590793	0.317029	0.768948	0.953653
ENSMUSG00000036792	Mbd5	7203.34	0.0359755	0.163742	0.676441	0.981835	7040.64	0.239886	0.268536	0.255183	0.684921
ENSMUSG00000081272	Gm13509	262.363	0.0104692	0.185248	0.765202	0.989985	206.152	-0.00651473	0.390382	0.951302	0.9904
ENSMUSG00000069495	Epc2	12399.2	0.0746319	0.160929	0.435429	0.924536	10777.9	0.0718814	0.234253	0.713139	0.941511
ENSMUSG00000026764	Kif5c	8334.29	0.0245751	0.158908	0.764502	0.989985	8366.68	0.26708	0.266835	0.207545	0.624547
ENSMUSG00000082879	Gm13525	22.6405	-0.00551305	0.188148	0.0804456		20.2753	-0.0235278	0.413813	0.110436
ENSMUSG00000026765	Lypd6b	84.6273	-0.0269965	0.190941	5.03174e-05	0.00880765	83.1517	-0.0803064	0.422187	0.129978	0.49846
ENSMUSG00000050447	Lypd6	283.641	0.0306969	0.189454	0.303962	0.856911	179.774	0.0273055	0.398847	0.808581	0.963586
ENSMUSG00000026766	Mmadhc	1345.1	0.000227371	0.179052	0.998746	0.999472	1121.85	-0.0781541	0.338107	0.690713	0.9352
ENSMUSG00000083449	Gm13487	20.129	0.0058388	0.187968	0.539941		4.87557	-0.00999873	0.411639	0.765266
ENSMUSG00000017144	Rnd3	799.552	0.0114827	0.188446	0.179778	0.729768	310.264	0.259242	0.521526	0.041163	0.26536
ENSMUSG00000086007	1700057H21Rik	112.598	-0.0184345	0.188275	0.372658	0.89722	151.987	0.00927624	0.397312	0.941005	0.988856
ENSMUSG00000084334	Gm13494	7.71866	0.00506199	0.18812	0.175834
ENSMUSG00000026946	Nmi	124.619	-0.0018307	0.186669	0.928982	0.995758	63.7367	-0.0689403	0.419586	0.152018	0.537792
ENSMUSG00000053475	Tnfaip6	83.765	0.0216282	0.189376	0.170571	0.716153	30.2519	0.0150308	0.409673	0.794835	0.958945
ENSMUSG00000036202	Rif1	67351.4	0.144291	0.1667	0.146756	0.677498	62147.3	0.29236	0.216765	0.116718	0.469967
ENSMUSG00000026950	Neb	1943.98	-0.0447213	0.179025	0.518118	0.948416	2021.08	0.0687412	0.30961	0.742189	0.947729
ENSMUSG00000036093	Arl5a	1453.3	-0.0253605	0.178241	0.645842	0.977525	2116.33	0.460777	0.512702	0.0786373	0.376327
ENSMUSG00000085315	A430018G15Rik	15.4373	0.00516031	0.188126	0.117886
ENSMUSG00000017412	Cacnb4	76.9831	0.0150425	0.188897	0.0202542	0.287681	28.1507	0.0435871	0.415766	0.144143
ENSMUSG00000055371	Stam2	971.443	-0.00562824	0.17822	0.916869	0.995246	847.032	-0.0431002	0.347622	0.815363	0.964615
ENSMUSG00000036053	Fmnl2	1852.21	0.141612	0.255514	0.0577034	0.4323	1670.62	0.534787	0.535659	0.0559085	0.309974
ENSMUSG00000061136	Prpf40a	7497.19	0.0631783	0.174318	0.454022	0.930519	5957.48	-0.0575993	0.257736	0.772666	0.954145
ENSMUSG00000026960	Arl6ip6	680.596	-0.00113951	0.182648	0.96837	0.999242	476.567	-0.16766	0.414317	0.311953	0.738505
ENSMUSG00000083287	Gm13502	212.226	-0.0145372	0.18635	0.625621	0.972654	237.094	0.0150684	0.390105	0.914871	0.984095
ENSMUSG00000026826	Nr4a2	531.64	0.0867098	0.214613	0.0328405	0.34023	212.145	-0.00337287	0.393942	0.96698	0.993351
ENSMUSG00000084938	BB557941	580.77	-0.0062795	0.183822	0.867037	0.994267	550.264	0.00463018	0.364196	0.984531	0.997497
ENSMUSG00000026827	Gpd2	629.357	0.0582386	0.198145	0.109173	0.59409	560.385	0.333408	0.539046	0.0894475	0.4055
ENSMUSG00000053472	Gm13534	3.44396	0.00490457	0.18811	0.267131
ENSMUSG00000026836	Acvr1	155.13	-0.00852936	0.186842	0.708113	0.987578	121.381	-0.0607825	0.408401	0.507718	0.863244
ENSMUSG00000036641	Ccdc148	155.069	-0.00233883	0.186802	0.903719	0.995192	133.366	-0.0165553	0.402385	0.847263	0.971659
ENSMUSG00000026991	Pkp4	13280.9	-0.122337	0.183352	0.214713	0.775436	14603.9	0.18284	0.246455	0.358686	0.782074
ENSMUSG00000081157	Gm13552	72.2782	0.0199293	0.189218	0.158425	0.700083	8.37513	-0.0220135	0.413481	0.299156
ENSMUSG00000035168	Tanc1	3831.33	-0.0437447	0.169459	0.590673	0.964856	3568.13	-0.0392714	0.273753	0.84209	0.970463
ENSMUSG00000026988	Wdsub1	188.235	0.0413123	0.193712	0.0713647	0.479543	103.247	0.0450565	0.410965	0.522902	0.87102
ENSMUSG00000026987	Baz2b	3623.85	-0.0669811	0.178272	0.413451	0.918621	4213.86	0.263513	0.309496	0.237011	0.665821
ENSMUSG00000081236	Gm13574	3.44371	-0.00475865	0.18811	0.277732		3.10266	-0.0228162	0.413657	0.304139
ENSMUSG00000085975	Gm13572	10.5376	0.00470757	0.188082	0.33702		6.42199	0.0212896	0.413147	0.40436
ENSMUSG00000026977	March7	1989.89	-0.00401974	0.171246	0.95036	0.997934	1651.96	-0.107351	0.329508	0.599062	0.903824
ENSMUSG00000026980	Ly75	77.8362	2.31076e-05	0.187156	0.990698	0.999472	123.64	0.0461869	0.410288	0.538741	0.878595
ENSMUSG00000086196	Gm13571	2.66359	-0.00472337	0.188106	0.313555		2.38533	-0.0225071	0.413602	0.343026
ENSMUSG00000054580	Pla2r1	96.4456	0.0125155	0.187653	0.532745	0.952372	116.354	0.052351	0.412346	0.45687	0.835382
ENSMUSG00000026971	Itgb6	32.283	0.00219364	0.187589	0.881169	0.994267	41.2018	0.0298113	0.40989	0.6415	0.919135
ENSMUSG00000026970	Rbms1	36.1111	-0.00994625	0.188352	0.162891	0.70603	30.9809	-0.03863	0.415509	0.0319414	0.230896
ENSMUSG00000064289	Tank	2918.72	-0.107201	0.200264	0.213995	0.774489	2852.68	-0.0919169	0.294694	0.659683	0.926415
ENSMUSG00000026914	Psmd14	762.2	0.0070438	0.184266	0.860281	0.994267	450.985	-0.194563	0.444866	0.193118	0.605177
ENSMUSG00000092660	Gm22403	13.0624	0.005143	0.188125	0.130244
ENSMUSG00000087794	Gm25966	6.14949	-0.00483097	0.188117	0.207125		5.54047	-0.0231713	0.413734	0.228744
ENSMUSG00000035033	Tbr1	9.12101	0.00218501	0.18791	0.780711		5.06286	0.00170649	0.411141	0.972341
ENSMUSG00000026904	Slc4a10	267.68	-0.00110788	0.185088	0.965902	0.998963	322.43	0.0999938	0.399432	0.49312	0.85671
ENSMUSG00000035000	Dpp4	23.3054	-0.00409029	0.187885	0.650096		17.5227	-0.0227655	0.412938	0.454617
ENSMUSG00000026893	Gca	96.538	-0.00919585	0.188055	0.423184	0.921359	71.3086	-0.0594787	0.418898	0.0483059	0.288614
ENSMUSG00000075324	Fign	82.8746	-0.00469474	0.18764	0.717525	0.989307	48.5018	-0.043726	0.416282	0.0148638	0.158466
ENSMUSG00000082127	Gm13577	58.5998	0.014222	0.188266	0.365977	0.892191	19.4548	-0.00653041	0.410077	0.880675
ENSMUSG00000084104	Gm13578	4.36144	0.000383748	0.187869	0.9688		3.1872	-0.00320173	0.411216	0.924258
ENSMUSG00000034903	Cobll1	2506.04	-0.0731514	0.190961	0.310544	0.861062	2445.99	-0.0910407	0.30414	0.660578	0.926415
ENSMUSG00000057182	Scn3a	100.663	-0.0277914	0.190803	0.0419271	0.379677	141.633	-0.0360453	0.40027	0.724822	0.943685
ENSMUSG00000075318	Scn2a1	32.2233	-0.00733102	0.188241	0.0344716	0.347696	29.032	-0.0287581	0.41431	0.0622989	0.329314
ENSMUSG00000044647	Csrnp3	934.572	-0.0787441	0.201985	0.166969	0.711148	979.237	-0.0771902	0.354582	0.678801	0.930461
ENSMUSG00000026994	Galnt3	325.895	-0.0249001	0.187131	0.469413	0.935993	298.968	-0.0890354	0.394496	0.537421	0.878187
ENSMUSG00000034848	Ttc21b	38.0024	-0.0128755	0.188634	0.0714029	0.479543	47.2659	-0.0234309	0.410156	0.66391	0.926537
ENSMUSG00000075316	Scn9a	3.56246	0.0049103	0.18811	0.263316
ENSMUSG00000027022	Xirp2	35.26	0.0059823	0.188011	0.499781	0.942627	5.85136	-0.0176043	0.412643	0.534028
ENSMUSG00000027030	Stk39	164.882	-0.0252635	0.189708	0.188746	0.743951	161.963	-0.122608	0.423287	0.269284	0.70001
ENSMUSG00000075312	Gm13597	15.5247	0.00459187	0.18807	0.382424
ENSMUSG00000116244		10.3545	-0.0048528	0.188119	0.155753		9.28082	-0.0233773	0.413778	0.173832
ENSMUSG00000053896	4933409G03Rik	12.366	0.00153473	0.187885	0.855229		3.97556	-0.0230018	0.413696	0.269919
ENSMUSG00000027035	Cers6	1566.74	-0.0660251	0.189155	0.326968	0.870573	1906.32	0.197816	0.336843	0.36563	0.787124
ENSMUSG00000103233	RP23-412L18.4	5.08308	0.00214503	0.187911	0.779184
ENSMUSG00000103747	RP23-412L18.3	3.13639	0.00186666	0.187903	0.806359		37.3202	0.0401019	0.415377	0.132685	0.503978
ENSMUSG00000104262	RP23-412L18.2	45.7182	0.0101056	0.188427	0.0107354	0.220099
ENSMUSG00000034738	Nostrin	104.231	3.58281	2.76125	0.00164685	0.0804468	111.959	3.85649	2.72183	0.00152886	0.0420027
ENSMUSG00000005233	Spc25	6240.86	-0.0605865	0.180121	0.426648	0.921878	4404.1	-0.992335	0.442284	0.00230172	0.0542539
ENSMUSG00000027048	Abcb11	10.0544	-0.00463662	0.188098	0.263169		8.86475	-0.0233557	0.413774	0.178308
ENSMUSG00000027070	Lrp2	99.2043	0.0177009	0.188871	0.209972	0.769433	48.2815	0.0291199	0.41094	0.607067	0.907921
ENSMUSG00000063145	Bbs5	382.852	-0.00105155	0.183522	0.972836	0.999351	460.943	0.15272	0.401575	0.379649	0.796178
ENSMUSG00000027086	Fastkd1	3826.24	-0.41022	0.416168	0.0170002	0.264022	3699.85	-0.316355	0.315807	0.161842	0.557071
ENSMUSG00000042133	Ppig	10882.9	-0.087332	0.174206	0.33154	0.872566	10703.4	0.00140991	0.267716	0.99701	0.99945
ENSMUSG00000082345	Gm13622	26.8524	-0.0090622	0.188296	0.172249	0.719481	59.5346	0.0164211	0.408598	0.804797	0.962596
ENSMUSG00000070883	Ccdc173	209.247	0.00891712	0.185714	0.780326	0.990632	107.291	-0.0799271	0.416769	0.315875	0.74208
ENSMUSG00000027088	Phospho2	9690.98	-0.114493	0.18903	0.228448	0.789186	10076.1	0.0607651	0.239834	0.759781	0.950212
ENSMUSG00000042155	Klhl23	20.4209	-0.00503073	0.188128	0.099378		18.2876	-0.0235148	0.413809	0.117568
ENSMUSG00000068882	Ssb	4512.25	-0.0741449	0.17705	0.386828	0.907285	5681.94	0.287997	0.387059	0.210506	0.628458
ENSMUSG00000051730	Mettl5	91.6342	-0.0297233	0.191565	2.3743e-05	0.00518153	107.352	-0.0953849	0.418987	0.293596	0.723074
ENSMUSG00000085735	Mettl5os	33.9978	-0.0113037	0.188534	0.0104336	0.216186	30.5223	-0.0430707	0.416163	0.02504	0.208311
ENSMUSG00000044308	Ubr3	5480.07	0.234847	0.290729	0.0574201	0.431331	3444.05	-0.225401	0.308237	0.301342	0.729926
ENSMUSG00000042064	Myo3b	25.1983	0.000729169	0.187814	0.951518		10.3364	-0.0233947	0.413783	0.163741
ENSMUSG00000075304	Sp5	862.912	0.0635129	0.201355	0.0638186	0.452684	214.971	-0.123552	0.430679	0.175925	0.578982
ENSMUSG00000097025	Gm26558	55.4483	0.0065969	0.187669	0.658554	0.978734	29.5401	-0.00445242	0.408954	0.924718	0.986654
ENSMUSG00000014959	Gorasp2	1885.34	-0.00324841	0.172663	0.95637	0.998605	1653.87	-0.0388456	0.314337	0.845006	0.971296
[truncated: 23,026 more rows]

## Sheet: TEs
# Supplementary Table 7
# TE expression in DuxKO/Obox4Het and DuxKO/Obox4KO versus DuxKO/Obox4WT 2C embryos
Name	family	baseMean_het	log2FoldChange_het	lfcSE_het	pvalue_het	padj_het	baseMean_DKO	log2FoldChange_DKO	lfcSE_DKO	pvalue_DKO	padj_DKO
L1_Mus3	L1	20933.4	-0.462483	0.282083	0.00796277	0.192407	26631.8	0.210635	0.274082	0.280479	0.723165
L1Md_F	L1	5532.05	-0.0474727	0.165591	0.599383	0.967788	5792.25	0.142045	0.263894	0.458116	0.848148
L1_Rod	L1	5832.8	-0.0920188	0.189775	0.306382	0.863804	6148.87	0.0566374	0.258048	0.765491	0.954596
Lx9	L1	19485.9	-0.148403	0.195389	0.185291	0.75649	23011.6	0.261083	0.253834	0.153902	0.560567
L1M4	L1	7190.22	-0.0661739	0.169405	0.490143	0.944743	7993.74	0.222285	0.274138	0.262526	0.706521
L1_Mur2	L1	9826.58	-0.641776	0.394312	0.00439946	0.135125	13622.3	0.235785	0.285805	0.23917	0.682686
RLTR26B_MM	ERVK	224.668	-0.0589126	0.206132	0.0213332	0.298508	294.809	-0.0555609	0.356051	0.600506	0.913437
RLTR25A	ERVK	1692.18	-0.194375	0.303461	0.0476607	0.409816	1816.51	-0.105865	0.296831	0.564256	0.895085
L1M2	L1	8940.62	-0.20987	0.237466	0.0872473	0.55718	9832.74	0.0769295	0.228648	0.664509	0.930072
B3	B2	140880	0.00928165	0.140233	0.926619	0.998482	139778	0.190567	0.206089	0.254685	0.699554
L1VL1	L1	1865.38	-0.0193737	0.181746	0.764435	0.987493	2222.71	0.227563	0.351262	0.246164	0.68915
L1Md_F2	L1	54480	-0.0339118	0.15647	0.715995	0.986988	67517.9	0.55742	0.29585	0.0138145	0.163761
ERVB7_1-LTR_MM	ERVK	753.412	-0.0827727	0.211158	0.135043	0.678418	853.62	-0.0425302	0.323991	0.781634	0.956842
L1MEf	L1	2534.3	-0.0597817	0.185524	0.44045	0.933696	2901.49	0.168724	0.294174	0.382628	0.811321
RLTR14	ERV1	2609.63	-0.0183386	0.171917	0.817166	0.993459	2096.97	-0.211056	0.322404	0.28655	0.729715
RMER17A	ERVK	862.013	-0.0616328	0.198616	0.274415	0.84163	1058.57	0.0644928	0.326067	0.691242	0.937247
RLTR13E	ERVK	459.825	-0.0247319	0.190139	0.589077	0.967125	384.163	-0.0972488	0.358681	0.445586	0.842231
Lx2	L1	6080.83	-0.163197	0.228255	0.125103	0.655431	7777.12	0.315095	0.29463	0.131083	0.516666
IAPLTR1a_Mm	ERVK	1199.07	0.109843	0.222517	0.128218	0.661992	948.514	0.13109	0.335499	0.447532	0.843021
ERVB7_3-LTR_MM	ERVK	90.8547	-0.00756337	0.192868	0.715233	0.986988	107.358	0.00829859	0.361131	0.916547	0.983576
ID_B1	B4	67842.6	-0.127954	0.160317	0.213543	0.789205	71443.6	0.126433	0.215314	0.465943	0.85221
L1Md_A	L1	32887.9	-0.080866	0.163791	0.412843	0.924358	36567.5	0.259029	0.247649	0.186872	0.614639
RLTR1D	ERV1	318.645	0.0151455	0.190639	0.701905	0.986988	256.804	0.00471058	0.349072	0.973576	0.991953
MER44D	TcMar-Tigger	525.529	-0.0592737	0.200955	0.206979	0.782602	421.098	-0.26356	0.469498	0.0787276	0.391398
Tigger7	TcMar-Tigger	2960.82	-0.024209	0.172477	0.758532	0.987493	2882.11	0.0445088	0.272404	0.817044	0.963158
RLTR13C1	ERVK	358.76	-0.0493605	0.198442	0.233826	0.810185	485.736	0.030855	0.350931	0.788277	0.95894
MER74B	ERVL	162.088	0.0107619	0.192718	0.669726	0.982717	165.567	0.0627848	0.363357	0.503273	0.870187
ID4_	ID	12795.7	-0.24771	0.229721	0.0606617	0.464691	12986.1	-0.0572944	0.225831	0.748648	0.950601
MLT1A1	ERVL-MaLR	3246.42	-0.13706	0.220874	0.152132	0.706069	3858.08	0.157355	0.276836	0.417796	0.830531
Lx4B	L1	2750.06	-0.344479	0.513554	0.0225405	0.303298	3800.92	0.200073	0.306577	0.309632	0.752363
B4A	B4	63026.9	-0.080246	0.149186	0.406202	0.92215	66579.3	0.181698	0.22041	0.299754	0.7417
BGLII_Mur	ERVK	678.526	-0.0125777	0.186442	0.806807	0.992854	577.518	-0.0707699	0.337863	0.626678	0.921105
L1_Mur3	L1	17329.9	-0.365427	0.299642	0.0209843	0.297207	18792.7	-0.0224223	0.230912	0.897255	0.980079
B2_Mm2	B2	89953.5	-0.191642	0.183495	0.0883697	0.558857	116909	0.539361	0.226358	0.00471662	0.0883862
B1_Mus1	Alu	64139.8	-0.0851199	0.150858	0.396607	0.919747	80231.3	0.56985	0.242688	0.00470854	0.0883368
Lx7	L1	18666.4	-0.387094	0.341703	0.0198365	0.289549	22515.7	0.129797	0.24258	0.4859	0.863345
ERVB4_2-LTR_MM	ERVK	879.746	1.89642	0.711102	0.000253186	0.0250361	494.547	0.272851	0.46921	0.0894853	0.420558
RLTR45-int	ERVK	4092.26	0.119047	0.19853	0.226837	0.804839	5244.26	0.993832	0.354737	0.000491717	0.0223076
PB1D10	Alu	36788.7	-0.126922	0.167869	0.233144	0.810185	38381.4	0.10379	0.217699	0.560795	0.892296
ORR1E	ERVL-MaLR	10946.3	-0.16126	0.20082	0.145537	0.698278	12230.7	0.157098	0.238812	0.403099	0.82255
PB1D11	Alu	9645.73	-0.149443	0.195923	0.176977	0.746653	9491.94	-0.0590912	0.226966	0.739773	0.94979
RLTR9D2	ERVK	115.345	-0.00590034	0.192663	0.782768	0.988795	175.823	0.0302266	0.364295	0.646295	0.92566
B2_Mm1t	B2	76390.9	-0.0195672	0.16068	0.825449	0.993459	114245	1.07682	0.235064	4.84838e-07	8.95131e-05
Charlie2b	hAT-Charlie	476.948	-0.0527357	0.198172	0.26104	0.835536	425.408	-0.108725	0.367722	0.361831	0.797156
Lx8	L1	25440.1	-0.14919	0.183288	0.171723	0.738372	28279.9	0.164847	0.233622	0.325009	0.766835
ORR1F	ERVL-MaLR	12367	-0.314192	0.251786	0.0291033	0.339302	14584.3	0.175019	0.239214	0.348451	0.787519
RSINE1	B4	76970.3	-0.133485	0.160394	0.212021	0.788121	77995.8	0.0549781	0.211615	0.749298	0.950785
MTEa	ERVL-MaLR	8245.4	-0.261227	0.251618	0.0477423	0.4103	10268.9	0.257678	0.278117	0.198333	0.631331
B1F	Alu	26551	-0.142878	0.170685	0.183879	0.755265	27024	0.0421424	0.219683	0.814874	0.963026
MT2_Mm	ERVL	174070	0.00646659	0.163376	0.928902	0.998723	121313	-0.751038	0.247175	0.000359174	0.0174194
L1_Mur1	L1	3291.84	-0.13854	0.219829	0.153123	0.706839	4059.41	0.222507	0.290712	0.26862	0.711604
RMER4B	ERVK	4597.93	-0.0671421	0.173992	0.462635	0.939657	5166.89	0.226061	0.273482	0.253271	0.697438
RLTR10D	ERVK	226.958	-0.0152105	0.191757	0.641336	0.977764	299.675	0.0636716	0.354683	0.589937	0.908589
Lx	L1	11842.4	-0.082994	0.172788	0.373487	0.908423	14773.5	0.417101	0.313603	0.0600602	0.33661
Lx10	L1	3033.44	-0.500532	0.483704	0.0118897	0.233432	3786.58	0.0667886	0.281898	0.720517	0.945527
MER119	hAT-Charlie	213.475	0.0035757	0.19116	0.918645	0.998211	174.258	-0.0126979	0.354847	0.885401	0.978668
B1_Mm	Alu	27647.5	-0.0487774	0.151359	0.618405	0.971859	36577.6	0.73558	0.255265	0.000580954	0.0249702
L1Md_T	L1	57644	-0.113409	0.162499	0.310461	0.86979	65426.1	0.298823	0.237249	0.113861	0.483887
L2a	L2	16213	-0.102632	0.163922	0.318075	0.874385	16976.6	0.123946	0.228403	0.492706	0.865587
MTD	ERVL-MaLR	31862.8	-0.219555	0.196363	0.0653405	0.483975	35118.8	0.125241	0.217124	0.455916	0.846771
MTC	ERVL-MaLR	16192.5	-0.224014	0.230732	0.0770729	0.52261	18653.2	0.170485	0.235432	0.344919	0.784969
L1M5	L1	7883.64	-0.187486	0.217013	0.0997704	0.592033	8641.61	0.0861214	0.241763	0.641182	0.922765
B1F2	Alu	11930.6	-0.0834287	0.165077	0.395281	0.919041	11004.6	-0.0887114	0.236841	0.598423	0.912159
L1MC	L1	1941.87	-0.0672723	0.188342	0.366417	0.905127	2344.04	0.210417	0.313159	0.289918	0.733946
L1MEg	L1	1984.79	-0.0891837	0.20549	0.219525	0.796039	2611.72	0.236523	0.325825	0.243619	0.687511
Lx5b	L1	4333.09	-0.22006	0.271489	0.0659967	0.485603	5144.39	0.140713	0.259555	0.460284	0.849454
L1MB7	L1	5371.49	0.0354013	0.169223	0.686199	0.984963	5560.41	0.279991	0.298791	0.177184	0.599411
B3A	B2	57735.4	-0.197608	0.182289	0.0877362	0.558406	59349	0.0246589	0.216533	0.89161	0.97902
RMER15	ERVL	9606.58	-0.125295	0.185481	0.228448	0.806498	10918.3	0.223534	0.240633	0.228002	0.669985
RLTR20B4_MM	ERVK	313.455	-0.0209166	0.192178	0.547206	0.957079	351.021	0.00851264	0.342758	0.952744	0.989103
B1F1	Alu	12244.3	-0.0165822	0.156534	0.851175	0.993459	12220.9	0.127814	0.253063	0.502532	0.869856
MLT1A	ERVL-MaLR	2164.63	-0.0797632	0.19361	0.318871	0.875404	2166.38	-0.0369001	0.288767	0.835186	0.969137
RLTRETN_Mm	ERVK	883.084	-0.101055	0.220613	0.110658	0.621283	1038.65	-0.00779131	0.315617	0.955727	0.989215
RMER1B	Other	7222.4	-0.187196	0.22054	0.10117	0.594229	7534.39	0.00129735	0.238638	0.996205	0.99891
L1_Mus1	L1	15755.6	-0.191172	0.215806	0.107919	0.614938	18320.6	0.189872	0.260438	0.320277	0.7622
Lx3A	L1	6461.81	-0.151932	0.223917	0.148228	0.701878	7571.51	0.166936	0.263756	0.389351	0.814863
MLT1B	ERVL-MaLR	4506.43	-0.285442	0.320306	0.0395307	0.387535	5732.6	0.238158	0.269342	0.231702	0.674031
MTB	ERVL-MaLR	5154.23	0.00634105	0.16214	0.946133	0.998866	4852.99	0.0680805	0.256144	0.721515	0.945816
MLT1C	ERVL-MaLR	2921.97	-0.145954	0.228991	0.128963	0.663937	3278.77	0.0552725	0.268588	0.768835	0.954996
L1_Mm	L1	5644.93	0.413952	0.368157	0.0173427	0.279014	5234.47	0.517804	0.369877	0.0347768	0.258353
IAPEY2_LTR	ERVK	254.594	-0.0869313	0.22282	0.00279715	0.106754	713.794	0.358276	0.528954	0.0696641	0.365634
IAPEy-int	ERVK	510.063	0.0556679	0.199284	0.244415	0.818772	295.894	-0.035084	0.347558	0.763949	0.954393
ERVB4_1B-I_MM-int	ERVK	1046.54	-0.0418927	0.191415	0.445486	0.936563	1328.01	0.138198	0.339714	0.422616	0.832877
RMER16A3	ERVK	56.2436	-0.00313915	0.193174	0.837797	0.993459	45.8048	-0.0165158	0.365048	0.734321	0.949266
IAPEY3_LTR	ERVK	211.46	-0.0531425	0.20334	0.0440244	0.402222	277.362	-0.028907	0.35805	0.736182	0.949266
L1Md_Gf	L1	1786.25	-0.0088962	0.178126	0.897896	0.996153	1972.42	0.191049	0.326724	0.320142	0.762116
MMETn-int	ERVK	3319.14	0.157128	0.231893	0.124577	0.653759	5568.42	1.67201	0.372227	4.5051e-07	8.41315e-05
ERVB4_1C-LTR_Mm	ERVK	384.277	-0.0172997	0.19006	0.677814	0.983086	403.182	0.0144706	0.339319	0.91895	0.98365
ETnERV-int	ERVK	3389.18	0.0628517	0.189618	0.382204	0.913728	3554.9	0.455248	0.371347	0.0554443	0.321606
MLT1D	ERVL-MaLR	3844.32	-0.328904	0.440173	0.0255793	0.321569	4884.66	0.120067	0.282575	0.528496	0.880483
L4_C_Mam	RTE-X	363.798	-0.00595002	0.189651	0.872776	0.993459	248.263	-0.109339	0.374695	0.297733	0.740095
MER45C	hAT-Tip100	97.349	-0.00651624	0.193024	0.727665	0.987493	129.65	0.0255092	0.359922	0.762081	0.954023
L1VL4	L1	6276.68	-0.130666	0.206833	0.186045	0.757301	8282.66	0.371654	0.336161	0.0922403	0.428424
L1_Mus4	L1	5362.78	-0.194229	0.251316	0.08728	0.55718	6052.75	0.071264	0.262981	0.704814	0.941388
RLTR6B_Mm	ERV1	1187.06	-0.0482057	0.19205	0.410334	0.923712	884.939	-0.402057	0.562307	0.0567866	0.325436
L1MA4A	L1	1446.83	-0.0218112	0.182257	0.735711	0.987493	1395.76	0.00575526	0.298028	0.978875	0.993244
L1MB3	L1	2867.49	-0.163453	0.24589	0.100879	0.59391	3547.41	0.176283	0.282086	0.365993	0.799986
Lx8b	L1	10972.2	-0.201796	0.2397	0.0840765	0.547308	12465.1	0.109963	0.255212	0.565015	0.895415
RMER17A2	ERVK	1452.56	-0.0186631	0.182696	0.765458	0.987719	1639.93	0.1581	0.32846	0.391827	0.817307
LTR81B	Gypsy	113.258	0.00649436	0.193042	0.746557	0.987493	118.313	0.0524177	0.363662	0.534909	0.883109
MusHAL1	L1	7055.59	0.264453	0.278652	0.0465102	0.407855	5137.07	-0.0063666	0.284619	0.967554	0.991284
ORR1B1	ERVL-MaLR	9574.2	-0.0859506	0.168107	0.360516	0.901849	9722.28	0.061768	0.235345	0.739128	0.94979
Lx6	L1	10198.1	-0.201631	0.237456	0.0886758	0.559893	11968.1	0.187373	0.236194	0.297136	0.739064
RLTR13A1	ERVK	182.038	-0.015121	0.192899	0.560131	0.959606	178.027	-0.0290364	0.358967	0.726472	0.947481
RLTR20B3	ERVK	316.233	-0.0334092	0.194358	0.367199	0.905739	421.136	0.0494835	0.346127	0.703783	0.941189
MIRb	MIR	20533.1	-0.104765	0.161564	0.300287	0.862372	22781.1	0.25072	0.225003	0.169291	0.586271
RMER12C	ERVK	1574.24	0.0698604	0.193554	0.345467	0.890304	1467.69	0.190174	0.333275	0.315839	0.757721
L1MC4	L1	4087.19	-0.125684	0.207873	0.190836	0.764601	4781.17	0.145617	0.291214	0.448011	0.843041
HAL1ME	L1	554.002	0.00832479	0.187776	0.867018	0.993459	692.118	0.205736	0.393989	0.211725	0.647841
MER58B	hAT-Charlie	1423.15	-0.0207057	0.18047	0.758792	0.987493	1465.26	0.0734581	0.307167	0.679671	0.934489
RLTR9A3	ERVK	199.104	-0.0464772	0.20046	0.0899817	0.562542	339.646	0.0468984	0.351599	0.690198	0.937208
RMER16-int	ERVK	1997.17	-0.115226	0.224952	0.119648	0.64263	2653.89	0.156939	0.318272	0.400726	0.821423
MMERVK9E_I-int	ERVK	2782.47	-0.0145986	0.175282	0.845996	0.993459	2958.08	0.175263	0.294131	0.368518	0.802379
RLTR6-int	ERV1	9723.61	-0.109749	0.188637	0.272456	0.840161	9841.21	0.00689644	0.250347	0.974823	0.992033
ORR1G	ERVL-MaLR	2360.3	-0.0288601	0.181055	0.677374	0.983086	2682.82	0.182366	0.31799	0.342783	0.782631
RMER1A	Other	4063.31	-0.142596	0.220256	0.156009	0.711957	4757.98	0.150117	0.272762	0.434996	0.83717
L2b	L2	8038.87	-0.115673	0.180946	0.262482	0.837197	9239.6	0.240912	0.265125	0.221132	0.6614
L1M3	L1	3034.25	-0.203437	0.304462	0.0557959	0.445296	3454.34	-0.00717989	0.282016	0.964001	0.990953
URR1A	hAT-Charlie	10891.4	-0.361862	0.293405	0.0211933	0.298351	11465.1	-0.068751	0.235796	0.695293	0.938475
ERVB7_4-LTR_MM	ERVK	100.883	-0.00182489	0.192427	0.928374	0.998636	160.452	0.0821134	0.36967	0.370215	0.803309
L2	L2	13908	-0.218893	0.22904	0.0761646	0.520108	15887.7	0.157949	0.233129	0.390497	0.815895
L1MC2	L1	1311.75	-0.0632162	0.193622	0.350936	0.894522	1238.89	-0.102054	0.320081	0.553872	0.888503
RLTR13G	ERVK	315.301	-0.00479466	0.190256	0.890247	0.995947	459.696	0.158644	0.385461	0.245198	0.68863
Lx4A	L1	5669.71	-0.411442	0.361081	0.0170131	0.275626	7053.4	0.130059	0.281955	0.498469	0.867198
L1MC1	L1	3064.45	-0.166491	0.254338	0.0888402	0.560156	3033.13	-0.157564	0.299925	0.405688	0.823793
MTE2a	ERVL-MaLR	8412.15	-0.327026	0.288617	0.0270781	0.329939	9299.88	0.0230825	0.244347	0.903224	0.981072
MLT2B4	ERVL	558.973	-0.181043	0.340179	0.00325518	0.115261	748.182	-0.059228	0.331427	0.695197	0.938424
L1MD	L1	4036.95	-0.0678016	0.178165	0.441622	0.934938	3975.12	-0.00130391	0.26301	0.990582	0.99764
Lx3C	L1	2665.88	-0.155114	0.242568	0.105232	0.607962	3724.21	0.384921	0.333078	0.0843915	0.406435
L4_B_Mam	RTE-X	176.101	0.00361931	0.191818	0.900572	0.996162	134.689	-0.0171109	0.358761	0.826402	0.966213
MER5A	hAT-Charlie	3851.46	-0.0607832	0.174519	0.485369	0.944601	3915.93	0.0540282	0.27054	0.773717	0.955995
MER3	hAT-Charlie	1605.41	-0.0444458	0.185858	0.515282	0.95028	1719.66	0.064698	0.300881	0.719731	0.945488
IMPB_01	Satellite	12056.1	0.231783	0.287645	0.0663829	0.487339	9321.87	0.108396	0.24525	0.557882	0.890215
MER2	TcMar-Tigger	4846.64	-0.0666714	0.174689	0.462311	0.939581	4916.78	0.0556798	0.254093	0.767363	0.954996
L1M4a1	L1	339.445	-0.0416419	0.196389	0.282211	0.847208	502.442	0.0937034	0.350251	0.50894	0.872967
L1MA4	L1	3087.55	-0.10465	0.208874	0.199368	0.774928	4009.6	0.205055	0.333355	0.292331	0.735901
RLTR51A_Mm	ERVK?	1199.88	-0.0423463	0.187138	0.513034	0.950191	1199.67	-0.0102087	0.304911	0.947782	0.988479
PB1D7	Alu	17753.2	-0.0558987	0.151527	0.563695	0.959606	17421.5	0.0676944	0.211857	0.699911	0.939668
UCON12	Unknown	17.3015	-0.00517616	0.193931	0.115872		15.6917	-0.0186153	0.368672	0.128599
L1MEd	L1	11564.4	0.0893192	0.178227	0.304383	0.863747	11873.2	0.394038	0.315473	0.0725983	0.373616
MIR3	MIR	7906.22	-0.0388145	0.164071	0.666813	0.982717	8312.75	0.181829	0.249506	0.338307	0.779753
L1_Mus2	L1	10298.2	-0.352187	0.295415	0.0232569	0.308135	12328.8	0.142921	0.256887	0.45257	0.84468
MMERVK9C_I-int	ERVK	2142.88	-0.0123109	0.174793	0.872578	0.993459	2065.23	0.0460692	0.284296	0.804321	0.961544
Lx3B	L1	3151.56	-0.077724	0.194316	0.315722	0.872926	3128.45	-0.0432641	0.3049	0.797425	0.959555
MIR	MIR	20247.1	-0.210839	0.241602	0.0794698	0.531229	21892.3	0.0323549	0.224967	0.834508	0.968862
RLTR20C1_MM	ERVK	1340.76	-0.0232721	0.181118	0.727793	0.987493	1278.93	0.00295788	0.306035	0.976715	0.992537
MIRc	MIR	11810.2	-0.0793921	0.162681	0.427011	0.927235	11727.1	0.0464377	0.229987	0.801648	0.961066
B1_Mur4	Alu	26192.7	-0.113094	0.165398	0.280197	0.845196	25269.3	-0.0396507	0.22577	0.85443	0.973418
MER5B	hAT-Charlie	2552.86	0.0442285	0.177428	0.589275	0.967125	2773.58	0.353032	0.360162	0.111717	0.479058
L1MA6	L1	4038.55	-0.138069	0.209766	0.171021	0.737659	4084.39	-0.043627	0.25633	0.809672	0.961806
Charlie1	hAT-Charlie	879.602	-0.0701281	0.202814	0.215522	0.791826	1169.39	0.117828	0.329651	0.495267	0.866251
MLT1A0	ERVL-MaLR	4059.14	-0.0222458	0.167639	0.794522	0.991345	4339.97	0.196144	0.28711	0.321302	0.763119
B1_Mus2	Alu	54970.1	-0.0969161	0.152171	0.323259	0.877076	65498.6	0.437476	0.226653	0.0186862	0.193372
Tigger18a	TcMar-Tigger	130.619	-0.0212278	0.194997	0.195772	0.771942	117.498	-0.083281	0.377828	0.167379	0.58244
L1MC5a	L1	1009.36	-0.0444049	0.188813	0.479375	0.944062	1281.69	0.200568	0.347862	0.290501	0.734138
L1Md_F3	L1	11859.4	0.251808	0.259422	0.0583524	0.454369	12729.5	0.744456	0.311023	0.00254975	0.0624824
L1M4b	L1	2469.92	-0.059627	0.183934	0.452646	0.937957	2079.36	-0.211812	0.342765	0.271212	0.71461
L1MA5	L1	1613.31	0.040988	0.183344	0.569208	0.961352	1622.25	0.165327	0.341003	0.355223	0.792675
L1ME3D	L1	150.535	-0.00664445	0.19236	0.782184	0.988596	303.291	0.145858	0.393258	0.180117	0.603746
MER131	SINE?	97.7414	-0.00702447	0.192761	0.741415	0.987493	158.132	0.0553759	0.364406	0.510924	0.874339
ID4	ID	11351.7	-0.113868	0.17318	0.276198	0.843159	12549.8	0.207636	0.235154	0.263153	0.707101
MER5A1	hAT-Charlie	1385.23	-0.0240811	0.180904	0.722815	0.987148	1670.8	0.241108	0.35469	0.227001	0.669101
RLTR17B_Mm	ERVK	4966.29	-0.168665	0.241407	0.104879	0.607218	6372.38	0.261234	0.301296	0.203991	0.636282
RLTR13D4	ERVK	20.4424	0.00378843	0.193604	0.735743		79.7874	0.073013	0.377264	0.0930259	0.430841
HAL1M8	L1	571.901	-0.0276275	0.191081	0.5313	0.954034	438.928	-0.179102	0.397273	0.19173	0.622069
URR1B	hAT-Charlie	9856.03	-0.0859027	0.168053	0.381134	0.913728	10078.6	0.0794907	0.230089	0.655336	0.927164
L2c	L2	7501.24	-0.0563314	0.171181	0.525697	0.952433	8086.54	0.154822	0.276682	0.422389	0.832809
RLTR45	ERVK	1034.94	-0.151569	0.267357	0.0456634	0.404662	1244.24	-0.0185488	0.309004	0.907365	0.981691
ORR1D2	ERVL-MaLR	6682.79	-0.285837	0.295815	0.0407051	0.389552	8304.83	0.212923	0.269944	0.278258	0.721389
L1MC4a	L1	2348.28	-0.0847233	0.193562	0.3058	0.863747	2487.9	0.0327028	0.284198	0.861089	0.975941
Lx3_Mus	L1	8845.57	-0.271525	0.2701	0.0457077	0.404662	10547.4	0.180153	0.248147	0.343459	0.783294
MLT1J	ERVL-MaLR	1749.12	0.00739587	0.180233	0.915837	0.998179	1779.09	0.128897	0.31655	0.480379	0.860827
L1MD1	L1	908.949	-0.106789	0.224497	0.100697	0.59391	914.211	-0.153049	0.345296	0.371596	0.803309
UCON6	Unknown	45.0927	-0.0162807	0.194781	0.0507261	0.422076	57.5185	-0.0208671	0.365717	0.657881	0.92745
MLT1F	ERVL-MaLR	841.815	-0.0531388	0.194668	0.349463	0.893414	1083.83	0.134389	0.335641	0.439442	0.839704
Zaphod	hAT-Tip100	157.134	-0.00893398	0.191951	0.748935	0.987493	168.597	0.00791868	0.354804	0.939365	0.987485
RLTR10C	ERVK	2431.81	-0.000637678	0.174919	0.995744	0.999821	2249.53	0.0240002	0.278187	0.899068	0.980741
MER77B	ERVL	264.158	-0.000490002	0.190547	0.982396	0.999215	439.932	0.248936	0.450103	0.103214	0.457173
MER89	ERV1	2558.56	-0.487944	0.509857	0.0130134	0.245393	2216.78	-0.527352	0.567946	0.042713	0.285697
PB1	Alu	8021.92	-0.0693247	0.164801	0.471273	0.942337	7967.74	0.0482002	0.233868	0.792386	0.95894
RLTR28B	ERVL	307.977	-0.0446399	0.198308	0.200779	0.775391	420.326	0.0252113	0.341663	0.852185	0.972728
X3_LINE	RTE-BovB	131.437	0.00757121	0.192741	0.745761	0.987493	131.436	0.0426704	0.361672	0.616474	0.919951
Lx2A1	L1	871.267	-0.168687	0.310382	0.00816575	0.195333	1120.7	-0.0618585	0.326589	0.69084	0.937208
L3	CR1	4344.71	-0.0908988	0.190325	0.306966	0.864433	4641.14	0.0681155	0.26932	0.719836	0.945488
MamGypLTR1c	Gypsy	53.7137	0.000817855	0.193094	0.974324	0.999215	36.9402	-0.010681	0.365855	0.786034	0.95839
MTE2b	ERVL-MaLR	6334.24	-0.086966	0.18198	0.351905	0.894577	7452.78	0.280338	0.275364	0.160445	0.572284
Charlie9	hAT-Charlie	223.508	-0.0164576	0.191856	0.617054	0.971532	259.549	0.0241023	0.348764	0.83983	0.970395
MTA_Mm	ERVL-MaLR	982693	0.0145137	0.138323	0.884408	0.994742	920121	0.0798963	0.214545	0.651355	0.926715
MLTR31FA_MM	ERVK	420.401	-0.013524	0.189534	0.742741	0.987493	521.452	0.100218	0.352522	0.479631	0.860171
MTC-int	ERVL-MaLR	5882.98	-0.0111918	0.160425	0.899559	0.996153	6219.06	0.241525	0.265538	0.222813	0.662937
MTD-int	ERVL-MaLR	2721.01	-0.0558143	0.180678	0.473555	0.943052	3324.2	0.307086	0.324848	0.148976	0.551756
MURVY-int	ERV1	338.251	-0.051266	0.200546	0.155563	0.711643	240.973	-0.163883	0.420221	0.0172227	0.184947
MTE2b-int	ERVL-MaLR	832.292	-0.00691795	0.185831	0.891595	0.996105	866.842	0.0775159	0.327248	0.643897	0.924233
RLTR27	ERVK	469.744	0.0319319	0.19258	0.465326	0.940348	405.612	0.0698442	0.349661	0.595547	0.910411
MT2B1	ERVL	7694.6	-0.52873	0.342121	0.00712038	0.180244	8811.28	-0.000469493	0.261953	0.989494	0.997475
BGLII	ERVK	4999.96	0.0426434	0.167241	0.674695	0.983086	6075.7	0.657675	0.332797	0.0081216	0.122155
B1_Mur2	Alu	21994.2	-0.109976	0.162901	0.287762	0.850645	23347.3	0.151006	0.222948	0.398709	0.820942
Lx5c	L1	7923.76	-0.645522	0.308313	0.00187427	0.083733	9337.99	0.0121317	0.24279	0.927885	0.986356
L1MD3	L1	943.688	-0.0679209	0.199878	0.261321	0.835536	1020.5	-0.0144225	0.327713	0.917218	0.983576
RMER17B	ERVK	2053.14	-0.0496031	0.181392	0.525403	0.952433	2155.45	0.0761302	0.284123	0.684869	0.935521
RLTR13B4	ERVK	255.259	-0.0158586	0.192904	0.550087	0.958088	356.17	0.0700775	0.350888	0.587317	0.907996
B1_Mur1	Alu	28667.1	-0.212592	0.199145	0.077784	0.525374	28327.2	-0.0697929	0.223475	0.680718	0.934489
ORR1A3	ERVL-MaLR	3127.71	-0.102853	0.195817	0.259569	0.834603	3349.1	0.0588432	0.264339	0.754575	0.952307
B4	B4	29507.4	-0.250658	0.215188	0.0519749	0.427147	32559.2	0.106483	0.210428	0.516886	0.876779
MER44C	TcMar-Tigger	96.5857	-0.0271551	0.196103	0.110681	0.621283	116.683	-0.0427486	0.363154	0.573965	0.900551
MTA_Mm-int	ERVL-MaLR	3.25576e+06	0.0376248	0.143855	0.703582	0.986988	3.09205e+06	0.144753	0.213217	0.41075	0.826149
Lx5	L1	11650.4	-0.0770537	0.171033	0.411657	0.924122	12334.7	0.129434	0.250446	0.491385	0.865587
L1ME4a	L1	886.278	0.00563552	0.183614	0.928227	0.998636	804.449	0.0143993	0.320539	0.935118	0.987157
L1MB8	L1	4419.28	-0.168258	0.231672	0.119076	0.64162	5091.29	0.128773	0.260345	0.501502	0.869507
RMER13A2	ERVK	914.427	-0.05726	0.19511	0.34108	0.888275	1122.9	0.104292	0.324798	0.545338	0.885745
ORR1D1	ERVL-MaLR	11329.8	-0.272057	0.239535	0.0396209	0.387535	12097.4	0.0118077	0.241377	0.952598	0.989103
RLTR20C2_MM	ERVK	598.978	-0.1057	0.2312	0.0403638	0.388276	988.67	0.148032	0.348379	0.383035	0.811366
ORR1A2	ERVL-MaLR	11869.2	-0.15555	0.191914	0.153018	0.706839	12112.8	0.00783882	0.235859	0.967024	0.991244
MER33	hAT-Charlie	1489.24	-0.121076	0.225731	0.129426	0.665472	1754.43	0.0540848	0.293898	0.767315	0.954996
RLTR16	ERVK	750.048	-0.0236523	0.188738	0.633975	0.974725	1112.87	0.379337	0.467936	0.08827	0.418085
UCON28a	Unknown	36.3469	-0.00460375	0.193543	0.695853	0.985856	55.667	0.0161027	0.363295	0.802872	0.961526
YREP_Mm	Unknown	181.881	-0.016839	0.192617	0.563243	0.959606	111.254	-0.136711	0.403291	0.0281217	0.233705
RMER20B	ERVK	868.654	-0.0662412	0.201105	0.235814	0.811588	1062	0.0579214	0.315395	0.73411	0.949266
Tigger16a	TcMar-Tigger	309.992	0.0122736	0.191536	0.715826	0.986988	191.303	-0.0528958	0.360929	0.560862	0.892316
ORR1B1-int	ERVL-MaLR	2996.68	-0.0929571	0.196033	0.280891	0.846537	3408.99	0.127636	0.282404	0.502575	0.869856
L1MC3	L1	2502.81	-0.41853	0.550701	0.0169219	0.274972	3072.57	0.040778	0.279613	0.828911	0.966873
L1MD2	L1	1745.81	0.000762308	0.178266	0.995773	0.999821	2107.24	0.370367	0.39025	0.0992205	0.445979
RLTR15	ERVK	1348.47	-0.195638	0.343774	0.0170086	0.275626	1942.41	0.112071	0.300632	0.546279	0.886181
RLTR1D2_MM	ERV1	206.101	0.0150168	0.192199	0.632218	0.974324	116.912	-0.0381631	0.36277	0.60713	0.9166
UCON26	Unknown	45.044	-0.00458903	0.193495	0.712167	0.986988	74.9363	0.0132086	0.365552	0.786841	0.958773
RMER6C	ERVK	3074.92	-0.177454	0.257963	0.086669	0.556197	3651.64	0.0989924	0.27935	0.598983	0.912573
RLTR19B	ERVK	210.225	-0.000224371	0.190929	0.989056	0.999821	255.849	0.0784094	0.360038	0.495011	0.866107
MER34A1	ERV1	297.16	-0.000859787	0.19003	0.975056	0.999215	304.853	0.0387183	0.347528	0.755216	0.952308
RLTR13D5	ERVK	794.715	-0.00813813	0.185782	0.875213	0.993459	1025.88	0.266775	0.401028	0.169824	0.586925
L1MCa	L1	2014.88	-0.0975778	0.202481	0.238957	0.813769	2335.54	0.118768	0.28712	0.530232	0.881403
RMER20A	ERVK	848.973	-0.0353033	0.187901	0.549751	0.958017	868.222	0.00621732	0.319941	0.973463	0.991909
RLTR14_RN	ERV1	581.904	-0.134653	0.260649	0.0173638	0.279077	576.914	-0.180585	0.398923	0.187491	0.615385
RMER13A	ERVK	742.569	0.00594244	0.185736	0.916866	0.998211	860.643	0.200679	0.369572	0.261398	0.704916
RLTR51B_Mm	ERVK?	378.02	-0.0280233	0.191779	0.507513	0.948758	438.814	0.0330182	0.339665	0.812274	0.962235
RodERV21-int	ERV1	4325.02	0.0229298	0.167106	0.793565	0.991161	5554.19	0.737511	0.350843	0.00493989	0.0908928
RLTR14-int	ERV1	1096.67	-0.0641632	0.195662	0.323005	0.876855	1506.3	0.248049	0.366517	0.210588	0.647105
MLT-int	ERVL-MaLR	417.123	-0.0465866	0.197141	0.27535	0.842267	478.054	-0.0148227	0.337019	0.907023	0.981691
MTE-int	ERVL-MaLR	2741.81	-0.076178	0.187536	0.3601	0.901752	3153.57	0.178117	0.284671	0.355987	0.792693
RLTR41	ERV1	550.929	-0.0720155	0.206323	0.154019	0.707771	615.371	-0.0501263	0.331805	0.73251	0.949136
RMER10B	ERVL	1681.62	-0.0586025	0.189877	0.408525	0.922581	2110.46	0.210579	0.338529	0.280011	0.722987
MLTR11B	ERVK	1669.25	-0.120267	0.223072	0.140115	0.688157	1918.76	0.0413924	0.28856	0.822612	0.965585
RMER4A	ERVK	2022.53	-0.0487217	0.183213	0.514381	0.95028	2043.6	0.0159905	0.306064	0.930762	0.986738
RLTR25B	ERVK	1648.27	-0.0779086	0.199701	0.269525	0.838273	2134.71	0.195134	0.333791	0.311831	0.754417
RMER20C_Mm	ERVK	1073.54	-0.0800408	0.204308	0.216879	0.791968	1081.88	-0.0851077	0.321816	0.608142	0.9166
RLTR28	ERVL	2035.55	-0.0483157	0.185941	0.490919	0.944743	2259.79	0.117191	0.292983	0.533713	0.882658
MamRep605	LTR?	245.181	-0.024945	0.194452	0.341338	0.888519	343.549	0.0321729	0.346204	0.798458	0.959999
ORR1C2	ERVL-MaLR	6154.22	-0.245577	0.2761	0.0560854	0.445989	6263.02	-0.0908476	0.26559	0.622842	0.921105
ERV3-16A3_I-int	ERVL	242.254	-0.0247051	0.19312	0.461133	0.939052	353.351	0.0849409	0.355543	0.50753	0.872392
L1MB4	L1	1477.96	-0.0474474	0.18634	0.494657	0.945044	1729.91	0.137809	0.324015	0.447769	0.843041
LTR72_RN	ERV1	434.753	-0.0451282	0.196277	0.300263	0.862372	543.948	0.0393249	0.333266	0.791047	0.95894
Charlie5	hAT-Charlie	866.417	-0.0181555	0.185001	0.752813	0.987493	925.435	0.0726012	0.325302	0.659274	0.92746
MER2B	TcMar-Tigger	430.302	-0.0119854	0.189602	0.767759	0.988003	454.595	0.0295431	0.341028	0.82838	0.966768
MYSERV16_I-int	ERVK	2350.68	-0.145765	0.240426	0.103166	0.601166	2918.78	0.136099	0.291376	0.476343	0.858038
RLTR20B2	ERVK	356.793	-0.0686033	0.207727	0.0929991	0.57394	429.075	-0.0427115	0.343842	0.734923	0.949266
LTR16B2	ERVL	238.339	-0.0185947	0.192121	0.572332	0.962122	313.742	0.058674	0.352152	0.628561	0.921362
MLTR25A	ERVK	891.092	-0.0780914	0.204455	0.213036	0.788589	1370.68	0.315883	0.410372	0.134215	0.521343
Lx2B2	L1	5445.67	-0.123427	0.201728	0.207395	0.782623	5974.9	0.0921578	0.261257	0.62857	0.921362
RLTR20A3_MM	ERVK	464.791	0.0003534	0.188981	0.998755	0.999905	430.578	0.00923743	0.341403	0.949671	0.988479
X7B_LINE	CR1	32.6728	-0.00608114	0.193684	0.576047	0.963195	48.3208	0.00416037	0.364369	0.947692	0.988479
RCHARR1	hAT-Charlie	3950.35	-0.134167	0.208969	0.17812	0.747969	4472.67	0.125646	0.262166	0.502622	0.869856
MER92-int	ERV1	113.124	-0.00635657	0.193147	0.715187	0.986988	155.762	0.0352427	0.357996	0.709604	0.942676
MER57-int	ERV1	182.09	0.0118587	0.193451	0.548187	0.957226	65.4525	-0.029562	0.367562	0.479352	0.860081
RLTR9F	ERVK	188.663	-0.0194348	0.192917	0.511683	0.950014	128.082	-0.104838	0.384708	0.127479	0.509785
L1MC5	L1	2353.11	-0.0858252	0.198014	0.276868	0.84398	2227.88	-0.125857	0.302686	0.494775	0.866048
RLTR17	ERVK	2188.65	-0.0744178	0.191927	0.341053	0.888275	2718.96	0.231912	0.325336	0.249885	0.694236
RLTR16B_MM	ERVK	441.825	-0.0305959	0.191903	0.486655	0.944601	467.843	-0.0043951	0.350506	0.958563	0.990004
Charlie13a	hAT-Charlie	182.696	0.000171764	0.191796	0.998486	0.999905	136.066	-0.0327902	0.360491	0.680681	0.934489
RMER5	ERV1	4659.58	0.02014	0.171025	0.78025	0.98845	5215.04	0.363409	0.346168	0.0998547	0.447295
MT2A	ERVL	5319.06	-0.0775406	0.18466	0.373946	0.908423	6308.36	0.256944	0.294582	0.207147	0.641173
ERVL-B4-int	ERVL	4396.2	0.036048	0.177928	0.647818	0.978532	3057.48	-0.306006	0.365443	0.148751	0.551427
MERVL_2A-int	ERVL	61050.1	0.0492994	0.173345	0.573031	0.962122	42086.8	-0.545156	0.266577	0.010365	0.139174
MurSatRep1	Unknown	7103.07	0.0071827	0.160195	0.939242	0.998723	7489.24	0.223657	0.299631	0.265744	0.709887
RLTR9E	ERVK	776.533	-0.0783587	0.206193	0.189163	0.763307	1263.34	0.31214	0.427278	0.128234	0.510893
Lx2B	L1	2783.22	-0.1172	0.212732	0.180122	0.750378	3440.39	0.193167	0.300075	0.327102	0.76803
RMER17C2	ERVK	1023.07	-0.0747729	0.20112	0.250994	0.826715	1423.49	0.230218	0.358884	0.236353	0.679952
MT2C_Mm	ERVL	8901.74	-0.172812	0.217685	0.123039	0.651212	7208.86	-0.651171	0.332694	0.00834557	0.124069
ORR1B2	ERVL-MaLR	4935.77	-0.0382603	0.174803	0.634346	0.974812	4844.57	0.0287981	0.269071	0.879335	0.978484
LTRIS2	ERV1	1206.59	-0.0560965	0.190611	0.406352	0.92215	1331.42	0.0582036	0.307561	0.741183	0.950258
MuRRS4-int	ERV1	3767.8	0.202172	0.263736	0.0797599	0.532071	3686.12	0.493838	0.360938	0.04015	0.276448
RMER17C	ERVK	3379.61	-0.0426323	0.174839	0.604806	0.968967	3729.24	0.200918	0.282943	0.31011	0.752781
IAPLTR2b	ERVK	417.849	0.0153481	0.189252	0.736973	0.987493	470.845	0.144084	0.369271	0.325332	0.767151
Tigger6a	TcMar-Tigger	283.729	-0.0618831	0.205867	0.0706761	0.501161	379.636	-0.020725	0.341966	0.864844	0.976858
LTR48	ERV1	300.939	0.00721444	0.190195	0.854583	0.993459	700.199	1.42233	1.03207	0.00482949	0.0899826
L1ME3	L1	827.439	-0.00743787	0.184442	0.899523	0.996153	922.591	0.139151	0.338554	0.421913	0.832805
LTR16C	ERVL	861.524	-0.0147607	0.185351	0.794023	0.991345	857.62	0.0301443	0.317622	0.857479	0.974495
Cheshire	hAT-Charlie	817.878	-0.027729	0.187615	0.61396	0.970158	785.92	-0.0310413	0.321658	0.839342	0.970107
MLT1E2	ERVL-MaLR	1161.63	-0.0535688	0.194584	0.361659	0.902599	1068.68	-0.152446	0.339255	0.384286	0.812004
B1_Mur3	Alu	17082.2	-0.148494	0.179061	0.176772	0.746611	17245.4	0.00871721	0.229426	0.940572	0.987586
RLTR9D	ERVK	603.977	-0.0344117	0.191425	0.48024	0.944062	553.282	-0.082469	0.345556	0.555213	0.889343
MLT2C2	ERVL	217.084	0.00088417	0.190746	0.986308	0.99981	229.441	0.0404029	0.353832	0.711811	0.943383
L1M3b	L1	38.1465	0.0138559	0.19456	0.00568592	0.159255
LTR80B	ERVL	13.0914	0.00546611	0.193935	0.129595		8.29323	0.019469	0.368679	0.159502
MLT1G3	ERVL-MaLR	853.228	0.0318282	0.187785	0.580617	0.96374	716.666	0.0223657	0.335332	0.879174	0.978484
MER20	hAT-Charlie	3488.88	-0.17328	0.244012	0.103406	0.601945	3380.45	-0.142134	0.29897	0.453044	0.845172
RLTR22_Mur	ERVK	1440.22	-0.0116778	0.180356	0.856626	0.993459	2574.89	1.24367	0.47455	0.000606433	0.0254592
RMER19B	ERVK	12062.8	-0.0753402	0.160554	0.442195	0.935132	13215.8	0.236325	0.239224	0.203964	0.636282
ORR1C1	ERVL-MaLR	5014.16	-0.138796	0.205469	0.171083	0.737688	5171.7	-0.00372865	0.258745	0.979015	0.993244
RMER10A	ERVL	4930.95	0.0562295	0.168957	0.542079	0.955883	5025.12	0.301884	0.294938	0.154819	0.562843
RLTR42-int	ERVK	1242.94	-0.0714726	0.199978	0.263504	0.837197	1334.98	-0.0179517	0.305265	0.912261	0.982044
MYSERV6-int	ERVK	6412.4	0.04681	0.165198	0.610993	0.969771	7101.03	0.460464	0.309323	0.0395284	0.276064
RMER17C-int	ERVK	2769.99	0.0449391	0.179424	0.556678	0.959021	2220.63	-0.0494706	0.282546	0.781595	0.956842
MLTR31A_MM	ERVK	196.755	-0.0471746	0.20059	0.0939085	0.576412	339.99	0.0568879	0.351758	0.638533	0.921992
MLTR11A	ERVK	1808.91	0.0428561	0.18476	0.544349	0.956519	2146.7	0.473616	0.470759	0.0568111	0.325462
MMAR1	TcMar-Mariner	615.385	-0.0628221	0.202799	0.179325	0.75037	688.035	-0.0532803	0.329645	0.717372	0.945031
MLTR18_MM	ERVK	296.223	-0.0518534	0.201546	0.114435	0.630606	390.001	-0.0177251	0.340242	0.885843	0.978668
MT2B	ERVL	4797.09	-0.131634	0.208045	0.182947	0.754805	4244.88	-0.268458	0.319389	0.191257	0.621718
LTR90A	LTR	6.78775	-0.00446407	0.19386	0.413934		29.6918	0.0224105	0.367524	0.539471	0.883502
7SK	RNA	391.351	0.0538852	0.20265	0.0933132	0.574728	249.059	0.0823114	0.36787	0.398216	0.820834
L1M3de	L1	6.45557	-0.00299603	0.193748	0.670176		28.3217	0.0314034	0.368283	0.426488	0.833933
L1VL2	L1	4823.11	-0.0811825	0.180111	0.377168	0.910096	6845.13	0.673817	0.361061	0.00959574	0.133136
RMER3D-int	ERVK	2815.29	-0.0877172	0.197325	0.260436	0.834848	3199.43	0.101298	0.283264	0.590933	0.909175
Tigger1	TcMar-Tigger	695.171	-0.0377764	0.190654	0.482387	0.944601	685.493	-0.0327774	0.334112	0.813464	0.962547
L1MB1	L1	951.317	-0.0385894	0.190467	0.480443	0.944062	1530.39	0.484604	0.531886	0.0527735	0.314925
MER52-int	ERV1	61.0525	-0.0144469	0.19435	0.2317	0.809538	84.5362	-0.0160582	0.361412	0.811032	0.961935
ORR1D1-int	ERVL-MaLR	1778.64	-0.0611901	0.189116	0.403296	0.920741	1642.61	-0.112246	0.309987	0.53159	0.881675
RLTR21	ERVK	2029.49	-1.12111	0.470386	0.000618457	0.043797	2587.1	-0.0436386	0.277758	0.813216	0.962547
RLTR53B_Mm	ERVK	32.8386	0.013965	0.194558	0.0229321	0.306135	48.6417	0.0426411	0.371582	0.0204414	0.201246
UCON4	Unknown	103.408	-0.017844	0.194531	0.251815	0.828166	105.003	-0.0400173	0.366974	0.476046	0.858038
MER106B	hAT-Charlie	80.7202	-0.00893131	0.192995	0.66411	0.982717	97.6921	0.00535923	0.36321	0.940069	0.987586
LTR37A	ERV1	281.599	0.0358751	0.195493	0.313711	0.872167	218.305	0.0596123	0.358385	0.574906	0.901071
MLTR32C_MM	ERVK	123.947	0.00630026	0.192225	0.816102	0.993353	69.6053	-0.034922	0.366017	0.537449	0.883321
RLTR18	ERVK	463.308	-0.0461328	0.197343	0.26111	0.835536	409.436	-0.163009	0.387744	0.226839	0.668866
RLTR30	ERV1	528.17	0.0503017	0.19734	0.285533	0.850065	301.993	-0.0485436	0.350797	0.67199	0.9328
BGLII_B	ERVK	846.589	0.0378749	0.190647	0.491009	0.944743	819.982	0.135944	0.353863	0.393167	0.817668
L1M4c	L1	1262.46	0.0447359	0.189269	0.47788	0.943394	1641.74	0.683357	0.605776	0.0229594	0.21407
PB1D9	Alu	23462	-0.0465027	0.148944	0.652944	0.979068	22436.7	0.0391075	0.223844	0.847214	0.971287
ORR1F-int	ERVL-MaLR	202.985	0.0039238	0.192092	0.889818	0.995803	281.127	0.115508	0.376205	0.294194	0.736871
ETnERV2-int	ERVK	1787.7	-0.0240529	0.17989	0.7293	0.987493	1728.16	0.0127814	0.289917	0.94728	0.988479
RLTR1B	ERV1	1231.52	0.0709651	0.196629	0.308602	0.868224	1154.52	0.198119	0.351412	0.289517	0.73337
RLTR1B-int	ERV1	5178.15	0.0933081	0.188523	0.31325	0.87178	5957.96	0.66979	0.368146	0.0105407	0.140951
MMERGLN-int	ERV1	9779.55	-0.321019	0.26498	0.0284485	0.33626	12099.8	0.226177	0.275479	0.260696	0.70463
L1MA10	L1	130.515	-0.0134647	0.192702	0.604413	0.968903	143.947	-0.00305967	0.355753	0.964794	0.991067
MER44B	TcMar-Tigger	874.261	-0.0726705	0.201844	0.236815	0.81176	998.388	0.019265	0.312691	0.912329	0.982044
RMER21B	ERV1	819.491	-0.083112	0.209377	0.161894	0.721537	947.178	-0.0044877	0.329653	0.969409	0.991457
L1ME1	L1	2501.06	-0.129746	0.220305	0.149644	0.7045	2764.51	0.0335083	0.276214	0.858929	0.97499
L1MA7	L1	741.186	-0.0389502	0.190096	0.48651	0.944601	1020.33	0.216935	0.376102	0.236312	0.679952
ORR1C1-int	ERVL-MaLR	1519.47	-0.0822238	0.19938	0.269679	0.838419	1541.56	-0.0278182	0.328431	0.846572	0.971287
ID2	ID	2532.6	-0.112458	0.210648	0.191352	0.764635	2812.24	0.0536515	0.270342	0.775117	0.956249
L1MDa	L1	1753.85	-0.166486	0.269532	0.0657056	0.48456	2144.89	0.0642348	0.285943	0.72879	0.948314
LTR78B	ERV1	99.7515	0.00580864	0.192599	0.808385	0.992854	163.512	0.10467	0.379673	0.232931	0.675491
RLTR13B2	ERVK	1382.81	0.161463	0.28651	0.0276142	0.330487	585.721	-0.116281	0.361752	0.384939	0.812567
MLT1K	ERVL-MaLR	1993.8	0.106341	0.208693	0.207516	0.782623	1933.31	0.316534	0.374789	0.143568	0.542328
Charlie1a	hAT-Charlie	2090.72	-0.0705418	0.19075	0.361018	0.902238	2010.44	-0.0739037	0.296184	0.678325	0.934058
RMER19C	ERVK	3028.41	-0.141174	0.222743	0.147492	0.700643	3100.22	-0.0510977	0.279242	0.776357	0.956363
L1ME3A	L1	828.792	-0.0511765	0.194937	0.347312	0.890982	1632.36	0.633023	0.73798	0.0272528	0.230493
IAPLTR2_Mm	ERVK	982.95	-0.0818899	0.207725	0.180612	0.750487	1472.63	0.27546	0.37704	0.177764	0.600068
IAPEz-int	ERVK	66070.9	0.337633	0.245245	0.0204313	0.294782	71182	0.786426	0.298686	0.00119302	0.0398009
IAPEY4_I-int	ERVK	526.681	0.00844779	0.187444	0.867956	0.993459	1102.17	1.33917	0.844959	0.00417177	0.0826165
L1M1	L1	192.883	0.00952213	0.191428	0.773966	0.988334	159.296	0.00623604	0.354554	0.956008	0.989253
Plat_L3	CR1	414.192	0.000604744	0.188698	0.995033	0.999821	563.44	0.196794	0.397012	0.20263	0.635554
B2_Mm1a	B2	115369	-0.0324187	0.164141	0.714717	0.986988	147610	0.686103	0.233038	0.000626927	0.0259839
L1MB2	L1	1567.8	-0.12444	0.229511	0.119578	0.64263	2065.09	0.166346	0.317711	0.38191	0.811321
RMER17D2	ERVK	650.023	-0.0269733	0.189539	0.585813	0.96546	744.075	0.0616033	0.334345	0.68554	0.935521
Tigger17a	TcMar-Tigger	882.612	-0.0467607	0.191955	0.416394	0.925	798.144	-0.118926	0.342398	0.456404	0.84716
ORR1A4	ERVL-MaLR	4890.77	-0.122113	0.197327	0.219573	0.796039	4958.23	-0.0144085	0.247541	0.933882	0.986837
Tigger17c	TcMar-Tigger	167.985	-0.0400791	0.198603	0.110364	0.620587	234.599	-0.012969	0.349718	0.897984	0.980348
BGLII_B2	ERVK	186.391	0.0119393	0.191856	0.705826	0.986988	197.719	0.0610158	0.361821	0.530843	0.881586
RLTR12B	ERVK	1236.98	-0.0119387	0.180653	0.853546	0.993459	955.055	-0.158533	0.355605	0.34056	0.781509
MLTR14	ERV1	3947.05	-0.0131905	0.166315	0.868589	0.993459	4002.32	0.128409	0.276121	0.498282	0.867136
RMER12	ERVK	1597.47	-0.0387179	0.184729	0.564633	0.959606	1711.29	0.0748562	0.302239	0.678533	0.934058
RLTR41A2	ERV1	267.379	-0.00239592	0.190528	0.937378	0.998723	212.366	-0.0270848	0.357463	0.715772	0.944922
MERV1_I-int	ERV1	2492.5	0.0316043	0.183703	0.638566	0.976469	2604.41	0.234192	0.352584	0.236923	0.680566
L1ME3G	L1	729.159	-0.0035469	0.185952	0.941018	0.998723	581.603	-0.0826611	0.343987	0.560698	0.892296
L1ME3B	L1	425.383	0.0118113	0.189964	0.776474	0.98845	320.505	-0.0290537	0.349516	0.790187	0.95894
Kanga1a	TcMar-Tc2	21.723	-0.00395555	0.19359	0.71052		33.7613	0.00745667	0.365835	0.869281	0.977581
RLTR31D_MM	ERVK	1732.68	-0.0418855	0.183026	0.559306	0.959234	2397.85	0.483933	0.427362	0.0518329	0.311669
Kanga1c	TcMar-Tc2	143.617	-0.0327059	0.196375	0.199764	0.775018	172.53	-0.0215469	0.359603	0.779207	0.956363
LTR16A	ERVL	584.506	-0.0945613	0.221487	0.0658483	0.484951	881.849	0.104952	0.335107	0.523113	0.878501
Tigger5	TcMar-Tigger	554.762	0.0178581	0.188214	0.721459	0.987148	806.89	0.506999	0.659215	0.0400899	0.276448
RLTR10A	ERVK	816.402	0.0040588	0.185852	0.945123	0.998866	1211.34	0.669331	0.61754	0.0244614	0.219571
MuLV-int	ERV1	1897.91	-0.00432991	0.177535	0.946554	0.998866	1549.39	-0.127578	0.314025	0.477461	0.858861
MLT1L	ERVL-MaLR	516.069	-0.0645205	0.206792	0.0738351	0.509959	865.845	0.105884	0.345386	0.491744	0.865587
RMER6D	ERVK	1235.3	0.0399942	0.190288	0.485202	0.944601	1473.68	0.397924	0.505424	0.0750049	0.381171
LTR40b	ERVL	330.988	-0.0165416	0.191247	0.644124	0.978433	235.153	-0.102931	0.377156	0.259223	0.702869
RLTR20A4	ERVK	1907.51	-0.055453	0.184152	0.470432	0.942337	2472.5	0.283549	0.373914	0.172663	0.591328
ORR1A0	ERVL-MaLR	23049.9	0.142078	0.177541	0.185891	0.757296	13335.6	-1.13552	0.282867	5.38994e-06	0.000663412
LTR10_RN	ERVK	353.676	-0.000527032	0.189321	0.983307	0.999653	402.508	0.090095	0.352755	0.507761	0.872518
RLTR13C2	ERVK	561.193	-0.0364727	0.192362	0.443059	0.935192	806.771	0.140653	0.364256	0.350341	0.7876
ID	ID	2824.5	0.0183809	0.17083	0.826546	0.993459	2705.93	0.105452	0.281382	0.575727	0.901705
RLTR19	ERVK	1445.08	-0.0980356	0.210019	0.190866	0.764601	1189.74	-0.40361	0.4886	0.0760749	0.384451
L1MB5	L1	2383.72	-0.0607125	0.182959	0.450563	0.937957	2620.44	0.122994	0.287768	0.516399	0.876706
RMER1C	Other	2909.55	-0.175164	0.263452	0.0807853	0.536145	3472.91	0.0839288	0.281121	0.651108	0.926715
RLTR42	ERVK	93.7451	0.000272605	0.192583	0.999494	0.999905	49.4863	-0.0528859	0.371194	0.259282	0.702912
MER46C	TcMar-Tigger	573.565	0.0702433	0.207898	0.108329	0.615763	427.971	0.117427	0.369401	0.350816	0.788123
RMER6B	ERVK	1546.22	-0.197959	0.317831	0.0388134	0.384271	1887.77	0.0235787	0.288112	0.900101	0.981072
Charlie4	hAT-Charlie	43.3406	-0.00152435	0.193366	0.897807	0.996153	105.93	0.0564342	0.370172	0.342665	0.782471
Charlie19a	hAT-Charlie	66.6859	-0.00800487	0.193122	0.67081	0.982717	72.4806	-0.00547167	0.361318	0.927008	0.986123
RMER6A	ERVK	9755.02	-0.0978112	0.175775	0.315231	0.872297	10218.2	0.0858189	0.242464	0.618863	0.919986
CYRA11_Mm	Y-chromosome	73.43	0.00156795	0.192701	0.949663	0.998866	79.427	0.0225246	0.36203	0.758487	0.953331
RLTR48A	ERV1	895.412	-0.0659576	0.20227	0.166559	0.730661	758.251	-0.178534	0.400305	0.180386	0.604399
RMER13B	ERVK	2725.5	0.0334719	0.176828	0.676629	0.983086	2435.9	0.053675	0.280522	0.773861	0.955995
L1ME3E	L1	139.357	-0.0147839	0.193937	0.395685	0.919267	148.961	-0.0357823	0.362794	0.621426	0.920652
MMERGLN_LTR	ERV1	585.352	0.019998	0.189282	0.672939	0.983086	595.138	0.126788	0.353852	0.411751	0.826257
RLTR1A2_MM	ERV1	155.87	-0.0127798	0.192245	0.652709	0.979068	340.223	0.198717	0.422962	0.114033	0.48424
RLTR12BD_Mm	ERVK	731.394	-0.0142688	0.186627	0.788983	0.990495	747.926	0.0377317	0.328124	0.809337	0.961806
Helitron1Nb_Mam	Helitron	31.8747	-0.00231645	0.19351	0.828913	0.993459	46.4619	0.0116227	0.365373	0.81428	0.962923
RLTR10B2	ERVK	208.658	-0.0200587	0.193261	0.476332	0.943087	213.356	-0.0310766	0.356515	0.73501	0.949266
RLTR10-int	ERVK	6678.03	-0.0683807	0.170956	0.462431	0.939582	8756.85	0.582754	0.309101	0.0120721	0.152231
IAP-d-int	ERVK	199.533	-0.0124842	0.192758	0.614907	0.970411	441.788	0.302485	0.505113	0.0663243	0.356439
IAPEY3-int	ERVK	1569.97	-0.104771	0.215407	0.162264	0.721537	1890.56	0.0801857	0.302247	0.658025	0.92745
RLTR18B	ERVK	779.396	0.0817223	0.208493	0.172075	0.738827	702.178	0.201094	0.383688	0.236374	0.679952
MER68B	ERVL	65.7001	-0.00837667	0.193208	0.647044	0.978532	120.258	0.0464647	0.364979	0.535974	0.883321
L1M4a2	L1	214.081	-0.0337922	0.195642	0.28217	0.847208	319.982	0.0542807	0.351003	0.655709	0.927164
MMERVK10D3_I-int	ERVK	640.379	0.111249	0.233926	0.049034	0.415614	582.829	0.25931	0.452804	0.104536	0.460144
MMERVK10C-int	ERVK	13973.6	0.147193	0.224477	0.141612	0.691005	13274.3	0.402849	0.314134	0.0652693	0.353595
BGLII_A	ERVK	454.495	-0.00799299	0.189876	0.832056	0.993459	379.609	-0.0567161	0.349909	0.634006	0.921434
RLTR34C_MM	ERVK	223.074	-0.0271789	0.193774	0.406906	0.92215	356.29	0.106821	0.362674	0.409852	0.825587
ORR1D2-int	ERVL-MaLR	1144.22	0.0194644	0.184177	0.753426	0.987493	1283.9	0.204058	0.372329	0.255257	0.699705
MLTR12	ERV1	400.256	-0.0221941	0.191614	0.5621	0.959606	515.531	0.0393133	0.356298	0.700978	0.940081
RLTR1E_MM	ERV1	31.1286	-0.00529178	0.193679	0.606626	0.969498	21.5015	-0.0233389	0.369074	0.0743048
L1MEc	L1	2743.41	-0.159553	0.244077	0.106142	0.611258	3136.09	0.0553587	0.279033	0.771002	0.954996
RLTR20B3A_MM	ERVK	247.069	-0.0401829	0.196896	0.245951	0.820095	332.718	0.024549	0.345267	0.847368	0.971287
RMER17B2	ERVK	726.724	0.0010997	0.187658	0.987979	0.999821	955.275	0.256545	0.415737	0.15921	0.570381
MamRep137	TcMar-Tigger	104.16	0.0125512	0.193149	0.584631	0.96546	65.7828	5.83998e-05	0.362595	0.989933	0.997475
RLTR30E_MM	ERV1	439.33	-0.0178068	0.190369	0.667632	0.982717	690.47	0.2862	0.444666	0.123283	0.502709
Looper	PiggyBac	127.856	-0.00123175	0.192942	0.934709	0.998723	157.064	0.0335213	0.360934	0.686525	0.935646
LTR50	ERVL	161.376	-0.00869491	0.192034	0.749725	0.987493	180.522	0.0175736	0.353962	0.867248	0.977013
RLTR24B_MM	ERV1	284.636	-0.00156897	0.189969	0.96022	0.999131	273.168	0.0125134	0.349276	0.917711	0.983576
Tigger5b	TcMar-Tigger	760.922	-0.0599843	0.198131	0.28029	0.845196	849.596	0.000166416	0.316405	0.995704	0.998808
MER47B	TcMar-Tigger	146.042	-0.0162751	0.193253	0.508269	0.948929	121.552	-0.0649486	0.368213	0.3956	0.819707
RMER15-int	ERVL	1338.42	-0.0704517	0.197308	0.297621	0.860361	2200.67	0.645267	0.503341	0.0237125	0.216666
ORR1A3-int	ERVL-MaLR	3774.86	-0.13703	0.235345	0.111168	0.622088	3929.96	-0.106663	0.269669	0.566773	0.896366
Lx2A	L1	423.801	-0.037716	0.195417	0.316616	0.873952	642.033	0.117197	0.355037	0.426706	0.834013
RMER2	ERV1	1671.66	-0.0539079	0.188205	0.443702	0.935819	2085.15	0.209971	0.340257	0.280498	0.723165
MurERV4-int	ERVK	1845.25	-0.0248974	0.178976	0.729186	0.987493	1918.76	0.0784392	0.308337	0.652107	0.926715
RLTR1	ERV1	201.319	-0.0456326	0.200961	0.0395013	0.387535	173.286	-0.156195	0.415102	0.0193292	0.19603
RLTR40	ERVK	2663.66	0.0846683	0.193024	0.319869	0.875404	3062.9	0.621703	0.430568	0.0213298	0.205911
RMER19A	ERVK	3872.94	-0.0538771	0.173746	0.539788	0.955883	4419.77	0.25729	0.28778	0.203265	0.635858
RMER13A1	ERVK	1118.63	-0.155773	0.26921	0.0497925	0.417388	1250.65	-0.0505293	0.330512	0.732834	0.949136
AmnSINE2	Deu	183.181	-0.00945764	0.193129	0.631766	0.974262	136.487	-0.0546786	0.369618	0.349415	0.7876
MER65D	ERV1	12.4209	-0.00361576	0.193779	0.593735		67.8138	0.0428229	0.369804	0.315682	0.757667
RLTR16C_MM	ERVK	261.121	-0.00565868	0.19097	0.85819	0.993459	171.879	-0.084699	0.372575	0.308317	0.751346
MamGypLTR2c	Gypsy	65.4097	0.0120903	0.194036	0.358993	0.901526	26.0472	0.00729685	0.366179	0.860627
RLTR9A3B	ERVK	112.473	0.00996016	0.192715	0.686738	0.984963	75.238	-0.00667486	0.361191	0.913899	0.982538
MERVL-int	ERVL	2.08499e+06	0.0447543	0.171332	0.612071	0.969771	1.33314e+06	-0.90931	0.259063	5.33482e-05	0.004373
RMER12B	ERVK	776.972	-0.0585212	0.199015	0.257576	0.833058	1068.04	0.1185	0.342137	0.466519	0.852495
MLT1F2	ERVL-MaLR	1119	0.0147408	0.18203	0.832845	0.993459	969.253	-0.00483887	0.318892	0.970374	0.991471
ERVB7_2-LTR_MM	ERVK	234.889	0.0153455	0.191716	0.654753	0.979939	160.989	-0.0192977	0.356167	0.826003	0.966086
L1MEi	L1	56.7925	0.0027703	0.193177	0.875979	0.993675	129.664	0.0892822	0.378689	0.188581	0.617428
MER68	ERVL	750.467	-0.0635444	0.199231	0.263431	0.837197	751.433	-0.070625	0.336301	0.637037	0.921992
MLT2D	ERVL	577.043	-0.0283311	0.190564	0.544277	0.956519	612.531	0.00756537	0.331505	0.963144	0.990908
MERV1_LTR	ERV1	295.336	-0.0321294	0.193961	0.389683	0.917892	393.012	0.0528865	0.346964	0.683926	0.935345
RLTR13A	ERVK	358.241	-0.0531517	0.200446	0.180595	0.750487	431.693	-0.0192196	0.339983	0.877933	0.978043
RMER19B2	ERVK	2123	-0.0522637	0.181697	0.505019	0.948597	2532.57	0.251177	0.321026	0.223143	0.663081
ORR1A0-int	ERVL-MaLR	185995	0.100597	0.15302	0.253531	0.82889	106611	-1.30235	0.314224	2.57135e-06	0.000379789
RLTR50B	ERVK	311.659	-0.0251103	0.192655	0.48743	0.944601	260.109	-0.109389	0.370601	0.337841	0.779562
RLTR10F	ERVK	243.375	0.0228531	0.192646	0.515195	0.95028	189.682	0.0249389	0.354479	0.809308	0.961806
ORR1E-int	ERVL-MaLR	1229.38	-0.0721058	0.19845	0.281975	0.847126	1155.12	-0.118543	0.333415	0.480658	0.860827
RMER17D	ERVK	580.045	-0.00645412	0.187639	0.887485	0.995146	519.83	-0.0216039	0.337972	0.866746	0.976921
MLT1J1	ERVL-MaLR	394.398	-0.019775	0.191379	0.597456	0.967361	544.069	0.134457	0.359754	0.375701	0.806199
MT2B2	ERVL	7099.57	-0.0967717	0.176572	0.325724	0.877992	5674	-0.507744	0.317007	0.0266951	0.228533
MLTR18D_MM	ERVK	556.699	-0.0372067	0.192849	0.42489	0.926437	558.698	-0.0457414	0.336668	0.741664	0.950258
RLTR11A2	ERVK	1989.94	-0.0970156	0.203495	0.233321	0.810185	2071.06	-0.0193987	0.293324	0.909631	0.981691
RLTR11A	ERVK	1829.74	-0.0663011	0.188927	0.395661	0.919267	2774.08	0.682654	0.430555	0.0145731	0.169201
RLTR44B	ERVK	115.981	0.00916493	0.192872	0.688759	0.984963	132.493	0.051568	0.365833	0.493018	0.865673
RLTR44-int	ERVK	445.419	-0.0469908	0.196671	0.289733	0.852493	369.68	-0.175227	0.398457	0.185308	0.612692
IAP1-MM_I-int	ERVK	393.21	-0.0149769	0.191566	0.647139	0.978532	498.829	0.054076	0.352724	0.646708	0.925679
RLTR44A	ERVK	57.5949	-0.0122753	0.193863	0.41856	0.925	102.865	0.0306494	0.361189	0.703237	0.941189
IAP1-MM_LTR	ERVK	779.408	0.0728638	0.208152	0.126753	0.658178	486.951	0.0462146	0.343211	0.731678	0.948971
MER74A	ERVL	320.762	0.0102266	0.19138	0.762041	0.987493	352.165	0.111292	0.364321	0.391885	0.817324
RLTR26	ERVK	109.029	-0.00833913	0.192921	0.686852	0.984963	279.069	0.185772	0.419999	0.0991761	0.445977
MYSERV-int	ERVK	975.593	-0.913323	0.879149	0.00536367	0.153409	1135.91	-0.135487	0.33534	0.429638	0.835236
MER21C	ERVL	1534.64	-0.0647963	0.191252	0.367033	0.905686	2079.2	0.305594	0.380144	0.149296	0.551777
MLT2B1	ERVL	659.48	-0.0221947	0.188072	0.662118	0.982378	557.915	-0.0897748	0.348916	0.516709	0.876779
MER54A	ERVL	151.275	-0.0341767	0.196814	0.175529	0.744444	160.246	-0.0328027	0.364175	0.609133	0.9166
MER34	ERV1	265.356	-0.0214352	0.193275	0.466684	0.940348	334.08	0.0197171	0.350673	0.863707	0.976456
RLTR9A3A	ERVK	47.5155	0.00260293	0.193401	0.859061	0.993459	22.2888	-0.0154504	0.36737	0.601943
RLTR1C	ERV1	635.354	0.0308376	0.190298	0.542001	0.955883	509.068	0.0184388	0.33534	0.900876	0.981072
MTEb	ERVL-MaLR	4749.1	-0.127395	0.198639	0.203318	0.778928	5673.33	0.26081	0.272095	0.193831	0.625333
RLTR9B2	ERVK	84.103	-0.0066045	0.193097	0.714926	0.986988	137.057	0.0565463	0.363372	0.524619	0.87862
RLTR9C	ERVK	60.6487	-0.00793413	0.193562	0.576133	0.963195	75.1655	-0.0026288	0.363791	0.949272	0.988479
MTB_Mm	ERVL-MaLR	3390.06	-0.0597787	0.178702	0.454673	0.937957	3625.55	0.113213	0.268156	0.551238	0.887871
RMER21A	ERV1	1147.51	0.0525371	0.19341	0.372611	0.908392	1110.91	0.209849	0.368385	0.254266	0.699013
IAPLTR2a2_Mm	ERVK	2527.85	-0.0321548	0.181157	0.645545	0.978532	2814.6	0.147183	0.30994	0.429432	0.835167
L1MA9	L1	1651.64	-0.0306824	0.181883	0.652417	0.979068	1870.94	0.143661	0.323804	0.432698	0.835886
RMER6BA	ERVK	622.328	-0.0508727	0.196549	0.302057	0.863265	687.49	-0.0158247	0.325084	0.912104	0.982044
ORR1A2-int	ERVL-MaLR	22667.6	-0.178566	0.190428	0.122757	0.650361	18855.7	-0.517367	0.257321	0.0120829	0.152231
L1ME2z	L1	977.923	0.00922627	0.185514	0.867666	0.993459	912.776	0.0382589	0.33066	0.802243	0.961468
RLTR20B1	ERVK	396.084	0.025254	0.192041	0.527204	0.953408	451.984	0.166944	0.39009	0.223826	0.663835
LTR55	ERVL?	10.3056	-0.00309975	0.193724	0.68382		37.5481	0.0373427	0.368332	0.421515	0.832684
MLT1O	ERVL-MaLR	570.561	0.0302031	0.191177	0.522587	0.952409	482.353	0.0488295	0.342231	0.721779	0.945934
RLTR23	ERV1	878.727	-0.0882817	0.211134	0.159447	0.717071	922.759	-0.070558	0.327075	0.654621	0.927164
L1ME4b	L1	1307.74	0.00548095	0.180228	0.938669	0.998723	1823.37	0.648902	0.524729	0.024239	0.21842
RLTR18-int	ERVK	264.439	-0.00388745	0.190691	0.903234	0.996162	314.926	0.0746805	0.354949	0.544706	0.885391
LTR29	ERV1	6.11181	0.00531279	0.193926	0.19862
MLTR18A_MM	ERVK	226.013	-0.00790077	0.191299	0.79336	0.991059	184.019	-0.0411684	0.359789	0.635872	0.921992
RLTR26_Mus	ERVK	493.445	0.00316866	0.187911	0.951808	0.998884	526.792	0.0886126	0.345628	0.543905	0.885391
RLTR12A	ERVK	786.929	0.017125	0.185631	0.766539	0.987898	966.075	0.296093	0.42938	0.133436	0.520676
MLT1E1A	ERVL-MaLR	446.417	-0.0366727	0.19304	0.415398	0.925	516.62	0.0219384	0.339685	0.875001	0.977581
MER34A	ERV1	301.307	-0.035865	0.195185	0.322816	0.876855	397.496	0.0389048	0.343282	0.769986	0.954996
ORR1A4-int	ERVL-MaLR	5247.25	-0.132201	0.202812	0.185348	0.75649	4660.16	-0.252212	0.306342	0.211686	0.647841
L1P5	L1	27.9236	-0.00420132	0.193611	0.688304	0.984963	45.4555	0.014058	0.364379	0.805809	0.961544
MLTR18C_MM	ERVK	171.739	-0.0190533	0.193492	0.45856	0.938308	356.266	0.179716	0.40237	0.177492	0.599831
IAPLTR4	ERVK	120.263	-0.0379012	0.198757	0.0434895	0.400296	132.568	-0.0745813	0.370617	0.340029	0.781284
MLTR31F_MM	ERVK	349.174	-0.00912617	0.189985	0.809353	0.992854	283.901	-0.0627764	0.354757	0.57587	0.901761
Ricksha_c	MULE-MuDR	57.9454	0.0247621	0.196022	0.0348506	0.366048	40.9425	0.0571868	0.37359	0.116735	0.490581
RLTR9A2	ERVK	67.1413	0.00889829	0.193241	0.651611	0.979068	155.813	0.144643	0.404049	0.0665402	0.356908
RLTR30D2_MM	ERV1	565.769	-0.0169811	0.187744	0.732596	0.987493	607.138	0.0355017	0.342887	0.786143	0.95839
Charlie4a	hAT-Charlie	369.26	-0.0535101	0.203114	0.0612093	0.466564	625.431	0.0789911	0.336877	0.60806	0.9166
RLTR47	ERVK	10.0641	-0.00194067	0.193692	0.794663		13.0774	0.00105559	0.366757	0.986368
RLTR31B2	ERVK	1041.43	0.00135387	0.182194	0.98649	0.999821	1149.22	0.158143	0.343744	0.371439	0.803309
ORR1D-int	ERVL-MaLR	414.368	0.0253409	0.191399	0.552853	0.958582	404.563	0.0922473	0.358007	0.471242	0.855736
RLTR20D	ERVK	489.387	-0.068428	0.206336	0.128751	0.663474	677.926	0.0573907	0.328982	0.715241	0.944828
ERVB4_1B-LTR_MM	ERVK	356.252	-0.00422864	0.189586	0.909071	0.996932	441.332	0.108731	0.360049	0.42134	0.832684
RLTR33	ERVK	1050.78	-0.0711535	0.199562	0.268627	0.837197	1489.79	0.270347	0.373814	0.184144	0.610731
Charlie12	hAT-Charlie	264.562	-0.0234586	0.192876	0.48434	0.944601	358.772	0.0588661	0.351209	0.632839	0.921434
MLTR73	ERV1	368.62	-0.0257485	0.192851	0.473147	0.943052	433.092	0.0195772	0.338439	0.889978	0.97902
LTRIS_Mus	ERV1	1114.27	-0.0947361	0.211661	0.172642	0.739198	1042.8	-0.180656	0.351721	0.311913	0.754417
MuRRS-int	ERV1	4652.02	-0.0116921	0.167705	0.886368	0.995031	3931.83	-0.115843	0.289306	0.532646	0.882146
IAPLTR1_Mm	ERVK	2171.36	0.0036815	0.176346	0.956701	0.999131	2723.82	0.485026	0.419146	0.0493517	0.304757
RLTR4_MM-int	ERV1	8035.25	-0.0880435	0.180451	0.348144	0.891919	9554.52	0.276226	0.297544	0.177368	0.599605
L1ME3Cz	L1	463.96	-0.0451354	0.195702	0.321753	0.87647	464.294	-0.0600649	0.346235	0.640718	0.922662
MER21B	ERVL	1362.24	-0.0484661	0.189469	0.45504	0.937957	1279.6	-0.082022	0.317388	0.625755	0.921105
MER31B	ERV1	519.723	-0.0246771	0.190013	0.592087	0.967361	481.242	-0.0517845	0.342733	0.693445	0.938315
ERVL-E-int	ERVL	545.799	-0.000625672	0.188495	0.982191	0.999215	548.464	0.0362892	0.344695	0.778181	0.956363
RLTR9A	ERVK	293.198	-0.0198531	0.192787	0.518097	0.951718	646.81	0.22745	0.44022	0.102404	0.455006
MLT1H-int	ERVL-MaLR	267.418	0.0287929	0.194186	0.386299	0.916083	169.602	0.00536565	0.355013	0.962795	0.990908
RLTR12H	ERVK	84.6458	-0.0172358	0.194296	0.313775	0.872167	136.717	0.0190272	0.358161	0.832079	0.967979
ERVB7_2B-LTR_MM	ERVK	374.007	0.011045	0.190004	0.787182	0.98978	475.46	0.170637	0.389475	0.229074	0.671678
MER88	ERVL	3.5512	0.00125897	0.193668	0.88351		5.15096	0.0100749	0.367272	0.719521
RLTR11C_MM	ERVK	1064.83	0.0210865	0.185108	0.725748	0.987148	861.731	-0.0317523	0.317471	0.840082	0.970617
RLTR10D2	ERVK	205.647	0.0195486	0.192626	0.544935	0.956597	140.086	-0.00229024	0.356249	0.967951	0.991445
ORR1C2-int	ERVL-MaLR	1239.28	0.0268983	0.184785	0.670434	0.982717	1310.44	0.211236	0.358213	0.263115	0.707101
RLTR34B_MM	ERVK	522.724	-0.0555749	0.198655	0.256588	0.832383	585.31	-0.0159895	0.335518	0.901913	0.981072
RLTR13B1	ERVK	705.014	-0.0199815	0.187642	0.694721	0.985435	844.843	0.125464	0.343907	0.444118	0.841664
MER31A	ERV1	413.809	-0.0693339	0.209334	0.0578696	0.453149	490.557	-0.073856	0.351975	0.557769	0.890215
MER57C2	ERV1	205.726	-0.0375866	0.196742	0.231605	0.809538	307.224	0.0467072	0.34921	0.703769	0.941189
MER53	hAT	596.299	-0.0435852	0.193368	0.394489	0.918774	719.576	0.0673375	0.329458	0.673044	0.933431
L1MA5A	L1	830.345	0.00956137	0.184625	0.871944	0.993459	713.736	-0.0115007	0.326584	0.933587	0.986837
MTEa-int	ERVL-MaLR	1569.47	-0.0826448	0.199781	0.266582	0.837197	1199.75	-0.625914	0.61066	0.0280773	0.233575
UCON11	Unknown	16.0886	-0.0060097	0.193966	0.0972223		14.598	-0.0186487	0.368673	0.134199
HAL1	L1	3142.16	-0.0979387	0.195487	0.270292	0.838419	3530.46	0.12363	0.273472	0.51618	0.876706
Arthur1	hAT-Tip100	499.7	0.00550431	0.188726	0.906217	0.99626	728.261	0.356165	0.515067	0.0764501	0.38574
ORR1B2-int	ERVL-MaLR	911.877	0.00283852	0.185393	0.964887	0.999215	895.313	0.0658432	0.32164	0.69094	0.937208
Tigger9b	TcMar-Tigger	231.394	-0.010049	0.19126	0.74955	0.987493	265.111	0.0362821	0.349996	0.758304	0.953331
MLT1J2	ERVL-MaLR	355.572	0.0135712	0.190004	0.744825	0.987493	408.615	0.109331	0.366272	0.381481	0.81092
MER121	TcMar?	229.476	-0.0162595	0.191805	0.625036	0.973632	264.379	0.0190456	0.351705	0.86228	0.976153
ERVB4_1-LTR_MM	ERVK	7.63976	0.00536681	0.193929	0.176028
ORR1G-int	ERVL-MaLR	28.441	-0.0039088	0.193595	0.707996	0.986988	26.214	-0.0135626	0.366284	0.721628
RLTR17D_Mm	ERVK	805.966	0.00141988	0.1853	0.984232	0.999678	1004.03	0.229189	0.391629	0.204124	0.636547
L1MA8	L1	1782.1	-0.051824	0.184546	0.471337	0.942337	1982.51	0.119269	0.296941	0.525119	0.878732
MLT1E3	ERVL-MaLR	646.22	-0.0335003	0.191091	0.488822	0.944601	620.408	-0.0556336	0.336773	0.694625	0.938315
MLTR18B_MM	ERVK	278.745	0.0267874	0.193723	0.422451	0.926235	296.628	0.122461	0.378717	0.27439	0.717842
RLTR19-int	ERVK	3213.26	-0.074934	0.189521	0.358659	0.901526	2816.32	-0.205888	0.324958	0.296553	0.738802
ORR1A1	ERVL-MaLR	11045.3	0.0851183	0.16697	0.392935	0.918419	7019.56	-0.798391	0.317936	0.00155209	0.0460962
ORR1A1-int	ERVL-MaLR	71579.9	-0.0755653	0.146159	0.459946	0.938822	49081.7	-1.08298	0.27194	6.49678e-06	0.000782289
RLTR10	ERVK	2927.16	-0.0541594	0.180569	0.502078	0.947387	3286.12	0.171389	0.286529	0.35799	0.794028
L3b	CR1	825.311	-0.0597634	0.198427	0.274375	0.84163	840.529	-0.0704825	0.329169	0.65118	0.926715
MARNA	TcMar-Mariner	163.102	-0.0172739	0.19274	0.54853	0.957226	258.976	0.0906583	0.36373	0.43157	0.835459
MER44A	TcMar-Tigger	361.876	0.00423423	0.18967	0.92425	0.998482	367.055	0.0509801	0.347971	0.687676	0.936484
MER110A	ERV1	44.8796	0.00782345	0.19369	0.549215	0.95789	101.781	0.0750401	0.377197	0.124535	0.504622
MER92D	ERV1	12.829	-0.000878089	0.193657	0.902686		66.0241	0.0513292	0.371685	0.215934	0.653677
MER90	ERV1	185.852	-0.00143542	0.191915	0.948904	0.998866	129.861	-0.0341771	0.364315	0.596583	0.910569
RLTR13D6	ERVK	629.707	-0.0201389	0.189077	0.665433	0.982717	885.694	0.207776	0.388366	0.222717	0.662937
MTB_Mm-int	ERVL-MaLR	1914.41	0.117115	0.230156	0.0997593	0.592033	1653.88	0.238832	0.386583	0.201032	0.6341
RLTR9B	ERVK	171.524	0.0285986	0.195344	0.273153	0.840631	76.5366	-0.00778385	0.361076	0.902259	0.981072
RMER16	ERVK	547.008	-0.0075264	0.187608	0.86956	0.993459	478.533	-0.0373951	0.338601	0.778954	0.956363
ERVB2_1A-I_MM-int	ERVK	168.265	-0.0169255	0.193204	0.507584	0.948758	211.822	0.0128094	0.3547	0.902014	0.981072
MRLTR33	ERVK	421.987	0.00749181	0.18867	0.870979	0.993459	508.276	0.136559	0.370072	0.332538	0.773322
RLTR12D	ERVK	447.612	0.00629737	0.188694	0.892139	0.996105	565.177	0.172698	0.383777	0.251059	0.696304
RLTR12E	ERVK	729.541	-0.0094268	0.186539	0.852361	0.993459	773.755	0.0753363	0.330019	0.639634	0.922269
LTRIS4A	ERV1	298.94	-0.0234598	0.192984	0.477119	0.943087	349.624	0.00897847	0.345572	0.947134	0.988479
LTR89	ERVL?	60.9452	-0.00632633	0.193363	0.677833	0.983086	36.5227	-0.0385082	0.370982	0.0151323	0.173626
RLTR13A2	ERVK	468.823	-0.167878	0.32335	0.000510032	0.0395751	607.482	-0.140701	0.357754	0.363618	0.798338
RLTR20A2B_MM	ERVK	422.958	-0.0898849	0.220903	0.0381221	0.38281	518.348	-0.0640125	0.342092	0.640446	0.922662
LTRIS4	ERV1	81.1504	-0.017745	0.194697	0.185544	0.756781	107.585	-0.0278433	0.36066	0.715335	0.944828
RLTR20B5_MM	ERVK	407.581	0.0138535	0.189124	0.764322	0.987493	360.861	0.0205757	0.347558	0.866836	0.976921
MLT1E	ERVL-MaLR	301.044	-0.0279276	0.192928	0.455828	0.937986	288.753	-0.0581642	0.35194	0.618263	0.919986
MER47A	TcMar-Tigger	75.1154	-0.00814736	0.192968	0.688557	0.984963	198.135	0.155983	0.403374	0.122095	0.501055
L1M2c	L1	328.606	-0.0107357	0.190196	0.764122	0.987493	506.514	0.151527	0.383872	0.251863	0.696569
MLT1-int	ERVL-MaLR	93.111	-0.0086911	0.192788	0.693843	0.985414	90.2807	-0.0152824	0.361089	0.822533	0.965585
AmnSINE1	Deu	407.817	0.0282663	0.191906	0.510739	0.949503	365.17	0.0703757	0.351683	0.581661	0.90563
RLTR13A3	ERVK	332.296	-0.0148853	0.190989	0.680877	0.983358	393.067	0.0423204	0.350213	0.722858	0.945975
MER63D	hAT-Blackjack	366.019	-0.0104033	0.189322	0.799827	0.99225	338.038	-0.014936	0.349712	0.885335	0.978668
RLTR31_Mm	ERVK	63.4187	-0.0223162	0.195393	0.112181	0.624576	75.0968	-0.0398049	0.365072	0.544205	0.885391
MMVL30-int	ERV1	7131.49	-0.0658799	0.166299	0.507755	0.948758	9010.43	0.508561	0.308345	0.0236281	0.216152
RLTR43C	ERVK	44.929	-0.00542224	0.193525	0.667873	0.982717	63.5335	0.00932595	0.363203	0.886921	0.978668
MERVK26-int	ERVK	828.406	-0.0727998	0.205087	0.184868	0.756309	1226.73	0.175714	0.355875	0.315969	0.757724
RLTR31C_MM	ERVK	680.872	0.0102287	0.186689	0.850707	0.993459	859.135	0.2131	0.3987	0.199288	0.632265
L1ME2	L1	1513.44	-0.0589365	0.190535	0.39921	0.920079	1906.76	0.198808	0.340127	0.299127	0.741405
MLTR25C	ERVK	164.497	-0.00856481	0.192529	0.720048	0.987148	223.22	0.05834	0.356918	0.593976	0.910246
RLTR6C_Mm	ERV1	3.28437	-0.00436572	0.193852	0.445804		6.86575	0.00393865	0.366838	0.904573
RLTR26D_MM	ERVK	101.029	0.00875906	0.192894	0.697705	0.986393	123.77	0.0534057	0.366934	0.458838	0.848189
RLTR13D3	ERVK	663.58	-0.0247257	0.188424	0.628829	0.973632	664.235	-0.00398815	0.327523	0.973055	0.991801
RMER17A-int	ERVK	524.716	-0.0938435	0.222523	0.0490199	0.415614	940.752	0.195681	0.374915	0.258344	0.701795
RLTR11D	ERVK	233.488	0.0334899	0.195177	0.324263	0.877307	244.131	0.13682	0.38595	0.225432	0.666715
BGLII_C	ERVK	75.443	0.0107462	0.1935	0.553823	0.958829	40.975	-0.000201508	0.364149	0.98553	0.995624
ETnERV3-int	ERVK	5581.26	0.112562	0.211273	0.193489	0.767382	3234.87	-0.487468	0.427873	0.0496991	0.305743
RLTR10B	ERVK	214.784	0.0275874	0.193873	0.409393	0.92364	123.597	-0.0162779	0.357737	0.841371	0.970717
RLTR31M	ERVK	223.094	-0.00970571	0.191371	0.758967	0.987493	242.003	0.0194647	0.34987	0.867469	0.977013
RLTR17C_Mm	ERVK	40.7251	-0.00871549	0.194022	0.268042	0.837197	149.252	0.0564003	0.369543	0.369838	0.803309
RLTR13F	ERVK	60.3507	0.00744792	0.193546	0.614088	0.970158	63.6992	0.0476921	0.367771	0.440571	0.839741
IAPEY3C_LTR	ERVK	127.475	-0.0360596	0.197841	0.0968658	0.585233	204.681	0.0121971	0.354386	0.907967	0.981691
Charlie7	hAT-Charlie	345.881	-0.0517776	0.200603	0.159211	0.717071	506.637	0.0582766	0.339812	0.685197	0.935521
ERVB4_2-I_MM-int	ERVK	878.072	0.0328355	0.18898	0.556233	0.959021	1057.75	0.405238	0.50035	0.0740789	0.378503
IAPLTR3	ERVK	73.967	-0.0109654	0.193281	0.576822	0.963195	72.4693	-0.0144942	0.364444	0.775602	0.956249
IAPLTR3-int	ERVK	420.591	0.00729113	0.18863	0.874872	0.993459	508.05	0.136986	0.370255	0.329995	0.771278
LTR104_Mam	Gypsy	52.6602	-0.00714309	0.193428	0.635422	0.975487	74.4794	0.0134091	0.361973	0.852229	0.972728
MER45B	hAT-Tip100	146.124	-0.0075545	0.192264	0.764312	0.987493	239.055	0.0911241	0.369418	0.370841	0.803309
L1MCb	L1	213.554	0.0159154	0.192294	0.614856	0.970411	173.435	0.0235892	0.35573	0.811777	0.962092
MTB-int	ERVL-MaLR	9826.7	0.051019	0.158682	0.600899	0.967959	9117.48	0.117162	0.234463	0.505927	0.87161
RLTR34D_MM	ERVK	308.175	0.0167044	0.19067	0.677534	0.983086	395.279	0.177721	0.397779	0.196505	0.628286
L1MEb	L1	116.731	-0.0140826	0.193102	0.551111	0.958329	107.723	-0.0362583	0.36247	0.625145	0.921105
Ricksha_0	MULE-MuDR	22.0228	0.000216208	0.193553	0.99634		11.9087	-0.0122283	0.3676	0.611531
Charlie1b	hAT-Charlie	773.709	-0.0482627	0.193567	0.378266	0.910546	860.892	0.0217893	0.319902	0.896267	0.980079
LTRIS3	ERV1	74.0917	-5.31359e-05	0.192785	0.988057	0.999821	100.64	0.0400569	0.364112	0.5842	0.90645
RLTR11B	ERVK	1005.8	-0.103433	0.219804	0.126731	0.658178	1149.22	-0.0101552	0.319561	0.94327	0.987987
HERVL40-int	ERVL	812.105	-0.0028792	0.186898	0.947823	0.998866	841.331	0.066709	0.335194	0.661701	0.928542
LTR40a	ERVL	248.601	-0.041901	0.197727	0.207127	0.782615	345.957	0.0262396	0.344973	0.837873	0.969735
LTR68	ERV1	19.4522	-0.00717998	0.194025	0.0636259		36.765	0.00230432	0.36544	0.971177	0.991471
L1MDb	L1	488.935	-0.014263	0.190607	0.711338	0.986988	329.298	-0.148839	0.395727	0.16034	0.57209
MLT2C1	ERVL	391.639	-0.0318022	0.192513	0.457014	0.938308	476.011	0.0313868	0.349433	0.791554	0.95894
RLTR44C	ERVK	159.043	-0.0433889	0.1997	0.0854257	0.552595	212.876	-0.0258593	0.35372	0.79143	0.95894
MLT1E1	ERVL-MaLR	215.057	0.0189998	0.192233	0.576451	0.963195	199.265	0.0513958	0.358824	0.607739	0.9166
MLTR31D_MM	ERVK	844.264	-0.0281161	0.187446	0.61108	0.969771	702.501	-0.139066	0.352999	0.378691	0.8087
RLTR26C_MM	ERVK	299.3	-0.0233114	0.192429	0.512425	0.950123	382.272	0.0406021	0.351421	0.725996	0.947363
BGLII_Mus	ERVK	553.094	-0.0961511	0.223895	0.0468704	0.408393	963.745	0.20029	0.368445	0.2648	0.708981
MER58A	hAT-Charlie	2111.94	-0.103035	0.216313	0.153213	0.706839	1908.98	-0.309048	0.38935	0.142193	0.539264
RLTR6_Mm	ERV1	889.069	-0.00401722	0.18676	0.93064	0.998723	1130.12	0.284306	0.405046	0.156391	0.565412
MER135	DNA	104.774	-0.000344064	0.19237	0.978914	0.999215	76.8592	-0.0272743	0.362754	0.685434	0.935521
MLT1H	ERVL-MaLR	920.709	-0.0704831	0.205126	0.171638	0.738372	1178.87	0.0584756	0.312378	0.735354	0.949266
RLTR30C_MM	ERV1	103.935	-0.0194004	0.194801	0.202551	0.77746	102.418	-0.0563422	0.36986	0.341987	0.782189
RLTR12C	ERVK	243.123	0.00636227	0.190609	0.864307	0.993459	398.995	0.263597	0.467575	0.0839285	0.404985
MER94	hAT-Blackjack	209.038	-0.0053944	0.191245	0.852655	0.993459	190.66	-0.0137195	0.35432	0.879331	0.978484
ERVB3_1-I_MM-int	ERVK	149.22	0.014971	0.193008	0.565564	0.959991	227.127	0.182986	0.418716	0.0990805	0.445751
MTE2a-int	ERVL-MaLR	280.932	-0.0102304	0.19043	0.7786	0.98845	351.492	0.0768315	0.355119	0.537087	0.883321
L1M	L1	238.327	-0.00437151	0.19118	0.883658	0.994742	209.534	-0.0225651	0.35231	0.823094	0.965824
RLTR13D2	ERVK	140.664	0.0247071	0.194716	0.317455	0.874385	55.3962	-0.0126652	0.365064	0.78349	0.958034
LTR80A	ERVL	29.2819	-0.0120266	0.194358	0.0564168	0.447135	51.8725	0.000316127	0.364678	0.992065	0.998026
MADE2	TcMar-Mariner	40.0109	0.00817101	0.193944	0.362295	0.903166	4.02173	-0.0182586	0.368599	0.268196
BLACKJACK	hAT-Blackjack	359.113	0.00143626	0.189701	0.977293	0.999215	433.478	0.113346	0.362548	0.39938	0.820942
Arthur1C	hAT-Tip100	4.46764	-0.000935436	0.193665	0.897475		45.0993	0.0596428	0.374259	0.0971365	0.441431
LTR40c	ERVL	136.433	-0.00207064	0.192877	0.903327	0.996162	140.043	0.00892111	0.356433	0.929041	0.986728
ZP3AR	Satellite	1115.61	0.0587696	0.192909	0.376174	0.909457	872.636	0.0182266	0.316631	0.915651	0.983316
Charlie8	hAT-Charlie	317.4	0.00128668	0.190226	0.978967	0.999215	565.899	0.45809	0.693244	0.0360511	0.263246
RLTR13C3	ERVK	378.196	0.0582525	0.202661	0.149526	0.70449	253.151	0.0625835	0.356429	0.581407	0.905408
LTRIS_Mm	ERV1	321.59	0.0267214	0.193317	0.449951	0.937957	207.769	-0.00677991	0.353589	0.936907	0.987209
MER112	hAT-Charlie	306.87	0.0382019	0.195616	0.315784	0.872926	154.84	-0.0424863	0.359575	0.631244	0.921434
RMER30	hAT-Charlie	1319.18	-0.040527	0.186277	0.535148	0.954863	1427.99	0.0678797	0.30854	0.700544	0.940081
Charlie29a	hAT-Charlie	93.6808	0.00571453	0.192674	0.805907	0.992854	82.0334	0.0107868	0.362474	0.877272	0.97786
MER90a	ERV1	231.096	-0.0406048	0.19753	0.20584	0.78236	228.894	-0.073256	0.364371	0.448196	0.843041
L1MCc	L1	172.872	-0.0242978	0.194301	0.357903	0.901526	158.254	-0.0667282	0.366688	0.424485	0.833225
MLT1F1	ERVL-MaLR	1159.33	-0.0212556	0.18228	0.741202	0.987493	1442.14	0.274296	0.373801	0.181162	0.605358
MER67A	ERV1	29.9936	-0.00464852	0.193604	0.670728	0.982717	48.489	0.0103249	0.365167	0.839727	0.970344
LTR85a	Gypsy?	117.548	-0.0151316	0.193499	0.484846	0.944601	100.556	-0.051266	0.367255	0.437965	0.838415
L1ME4c	L1	458.561	-0.0278084	0.190841	0.528701	0.953544	541.99	0.0567086	0.337865	0.6979	0.939114
LTR31	ERV1	208.874	-0.0206419	0.192789	0.511389	0.949912	130.795	-0.121796	0.394929	0.0461157	0.29509
LTR103_Mam	ERV1?	43.582	0.00693333	0.193798	0.501678	0.947346	12.2092	-0.00272315	0.366808	0.913862
RLTR13D3A1	ERVK	821.05	-0.0696623	0.200934	0.254799	0.830066	1001.54	0.0693325	0.321142	0.679072	0.934254
SRV_MM-int	ERVK	331.953	-0.0177164	0.190948	0.622733	0.973434	362.081	0.0141647	0.345216	0.913539	0.982476
L1MEh	L1	89.8903	0.00860261	0.192904	0.704801	0.986988	265.49	0.248456	0.492103	0.0156363	0.177766
RLTR44E	ERVK	186.545	0.0343751	0.196378	0.230961	0.808851	119.42	0.0409896	0.36118	0.633715	0.921434
MER92B	ERV1	438.755	-0.0100084	0.188478	0.819938	0.993459	551.445	0.135321	0.360817	0.370632	0.803309
Arthur1A	hAT-Tip100	41.5137	0.00388108	0.193289	0.80893	0.992854	40.4054	0.0159408	0.364893	0.768363	0.954996
RLTR13B3	ERVK	289.156	0.0249562	0.19384	0.416353	0.925	374.045	0.1916	0.420523	0.111264	0.478128
MLT2B3	ERVL	484.207	-0.031125	0.191718	0.490396	0.944743	481.521	-0.0393041	0.337119	0.772797	0.955995
MLT1I	ERVL-MaLR	693.146	-0.0545063	0.197913	0.27452	0.84163	1037.18	0.166787	0.364686	0.313702	0.756638
Tigger13a	TcMar-Tigger	428.543	-0.00985801	0.188646	0.819982	0.993459	452.345	0.0404219	0.340822	0.769338	0.954996
MamRep1151	LTR?	98.2258	0.0237875	0.195128	0.234051	0.810185	104.161	0.0888531	0.378596	0.188428	0.617216
Charlie21a	hAT-Charlie	53.0502	0.00343319	0.193175	0.846307	0.993459	21.298	-0.0305064	0.369492	0.196173
MLT1H1	ERVL-MaLR	710.718	0.000437663	0.186387	0.998708	0.999905	631.952	-0.0104508	0.328748	0.937971	0.987209
Charlie2a	hAT-Charlie	348.804	-0.0276691	0.193647	0.414855	0.925	376.538	-0.027147	0.34685	0.815967	0.963026
MLT2B2	ERVL	386.488	-0.0219069	0.190843	0.59543	0.967361	626.549	0.227308	0.415357	0.163615	0.57629
LTR33A	ERVL	164.567	-0.0176827	0.193069	0.5146	0.95028	227.561	0.0423425	0.354197	0.697749	0.939114
LTR33	ERVL	710.631	-0.0287979	0.188484	0.589327	0.967125	620.844	-0.101526	0.342273	0.505416	0.871498
RMER16_Mm	ERVK	334.24	0.00126194	0.189669	0.980837	0.999215	346.026	0.0522442	0.347089	0.685676	0.935521
LTR48B	ERV1	93.9373	0.00329413	0.192511	0.894217	0.996153	88.8989	0.0144303	0.360742	0.853706	0.973212
MER57E1	ERV1	228.611	-0.0460326	0.199271	0.160539	0.718591	275.187	-0.0308284	0.350755	0.773622	0.955995
MLT1H2	ERVL-MaLR	666.931	0.066651	0.20531	0.144446	0.696362	358.838	-0.0131113	0.34776	0.901508	0.981072
IAPLTR2a	ERVK	352.196	0.0008382	0.18983	0.989158	0.999821	595.27	0.335633	0.530165	0.0639403	0.349307
MER45R	hAT-Tip100	134.293	-0.0411168	0.199286	0.0709113	0.501663	232.981	0.0303715	0.353107	0.779359	0.956363
MER102c	hAT-Charlie	167.766	0.00335837	0.192111	0.905744	0.996165	217.148	0.0845356	0.36702	0.406701	0.824777
Eulor10	DNA?	51.7706	0.0120253	0.194378	0.00628457	0.169016
MLTR31E_MM	ERVK	66.3334	0.00984953	0.193583	0.548107	0.957226	72.4811	0.0418979	0.367787	0.450463	0.843942
Charlie10	hAT-Charlie	97.8315	-0.00131707	0.192866	0.934918	0.998723	91.6493	-0.00167724	0.360255	0.972038	0.991751
MLT2B5	ERVL	31.0327	0.00255514	0.19359	0.818873	0.993459	38.8436	0.0215206	0.366723	0.61803	0.919986
RLTR41C	ERV1	162.585	0.000238374	0.191613	0.998653	0.999905	155.518	0.0105878	0.355911	0.916083	0.983492
Arthur1B	hAT-Tip100	291.126	-0.0165962	0.19135	0.640524	0.977294	315.907	0.0119036	0.344361	0.929156	0.986728
IAPA_MM-int	ERVK	69.9102	0.00726004	0.193085	0.715559	0.986988	99.5945	0.0655451	0.370341	0.350475	0.787792
L1ME3C	L1	198.537	-0.0380814	0.197132	0.204264	0.781076	259.144	-0.00381384	0.351402	0.962866	0.990908
MLT2E	ERVL	57.7852	-0.00283474	0.19329	0.83757	0.993459	39.9636	-0.0284822	0.367149	0.515073	0.876551
IAPEY5_LTR	ERVK	176.888	0.00704592	0.191649	0.821412	0.993459	155.484	0.0131873	0.356532	0.891753	0.97902
IAPEY5_I-int	ERVK	213.431	-0.0129049	0.191864	0.673728	0.983086	263.915	0.0397451	0.353454	0.718241	0.945217
RMER16B2	ERVK	301.499	-0.0230702	0.193655	0.425413	0.926437	379.352	0.0184332	0.342625	0.891187	0.97902
MER20B	hAT-Charlie	427.797	-0.000796192	0.190227	0.975277	0.999215	427.393	0.0356444	0.342287	0.79086	0.95894
MER103C	hAT-Charlie	446.564	-0.0509229	0.197783	0.26621	0.837197	534.138	0.0129461	0.331752	0.934292	0.986959
LTR67B	ERVL	378.5	-0.0172372	0.190504	0.664787	0.982717	452.172	0.0589456	0.34688	0.65494	0.927164
MER87	ERV1	11.5311	0.000462208	0.193651	0.96952		24.0039	0.017978	0.367367	0.595351
Chap1_Mam	hAT-Charlie	41.3423	-0.0185513	0.195067	0.0418299	0.393935	41.4948	-0.0481539	0.370757	0.257348	0.701124
MER89-int	ERV1	16.3152	-0.00586399	0.193959	0.100109		14.7977	-0.0186493	0.368673	0.133119
Charlie24	hAT-Charlie	427.35	-0.0707293	0.208726	0.0887294	0.559893	461.522	-0.101966	0.357038	0.440398	0.839741
L1ME3F	L1	112.039	-0.00891504	0.192939	0.670941	0.982717	169.376	0.0552122	0.36061	0.569809	0.898085
Charlie17	hAT-Charlie	89.4079	0.0228255	0.195637	0.0576148	0.452026	87.3784	0.102215	0.387771	0.0323185	0.249089
MER63A	hAT-Blackjack	161.625	0.0293566	0.195191	0.297841	0.860438	258.92	0.236777	0.47097	0.0358023	0.2619
MurERV4_19-int	ERVK	903.523	-0.0559733	0.195808	0.327009	0.878781	902.587	-0.0671673	0.325675	0.671266	0.9328
MER70A	ERVL	115.382	0.0044899	0.192319	0.862139	0.993459	148.287	0.0595888	0.365465	0.47787	0.858881
RLTR31_Mur	ERVK	490.628	-0.0552095	0.200514	0.196028	0.771942	766.424	0.133605	0.355529	0.39249	0.817599
MamTip2	hAT-Tip100	649.477	0.0109911	0.1868	0.837455	0.993459	606.457	0.0374332	0.338139	0.792128	0.95894
MER77	ERVL	402.368	0.000557009	0.189153	0.995827	0.999821	369.081	0.00584516	0.342619	0.969289	0.991457
LTR16B	ERVL	127.785	-0.0182962	0.193903	0.403984	0.921048	126.573	-0.0433996	0.363109	0.57103	0.898921
RLTR31A_Mm	ERVK	60.666	-0.0049618	0.193297	0.742577	0.987493	109.815	0.0359538	0.365173	0.580008	0.904877
MER130	Unknown	44.5874	-0.0112216	0.19406	0.317926	0.874385	73.2202	0.0050916	0.362276	0.947537	0.988479
RLTR20A	ERVK	82.1633	-0.0100228	0.193674	0.498493	0.945045	93.5751	-0.0162184	0.362801	0.789199	0.95894
MLT1G1	ERVL-MaLR	371.313	-0.01432	0.192234	0.626557	0.973632	566.854	0.17924	0.380747	0.257242	0.701124
LTR102_Mam	ERVL	114.256	0.00456473	0.192375	0.846058	0.993459	127.058	0.0392541	0.362349	0.625405	0.921105
LTR53B	ERVL	21.8815	-0.00514236	0.193739	0.571892		35.6623	0.00503473	0.36553	0.920897	0.984463
Charlie7a	hAT-Charlie	10.716	-0.000610711	0.193655	0.927342		5.5616	-0.0184038	0.368626	0.227876
MER21-int	ERVL	68.8035	-0.0128201	0.193794	0.438134	0.932525	58.6392	-0.0339846	0.367846	0.445032	0.842218
MER5C1	hAT-Charlie	69.6433	-0.00779124	0.193569	0.576419	0.963195	57.2916	-0.030978	0.367631	0.469113	0.853871
MTEb-int	ERVL-MaLR	486.21	-0.00835863	0.188598	0.845203	0.993459	545.569	0.0757344	0.344275	0.595514	0.910411
LTRIS6	ERV1	43.9211	0.00993151	0.193732	0.496314	0.945045	68.3382	0.0672575	0.374053	0.209582	0.645721
RLTR24	ERV1	972.006	-0.0611495	0.195632	0.323123	0.876855	1049.68	0.00246064	0.327284	0.992318	0.998026
LTRIS5	ERV1	54.5174	-0.0195236	0.195299	0.000885923	0.0544205	62.4698	-0.0480532	0.368971	0.372126	0.80334
MER115	hAT-Tip100	125.024	-0.0149947	0.193951	0.392299	0.917892	185.339	0.0172483	0.354102	0.869091	0.977521
ORSL-2b	hAT-Tip100	45.9291	0.00526445	0.193322	0.746176	0.987493	100.731	0.0835163	0.377828	0.17685	0.598897
MLT1G	ERVL-MaLR	452.604	-0.0760493	0.212085	0.0616119	0.467031	472.543	-0.154527	0.377786	0.274441	0.717842
ERVL-int	ERVL	450.652	-0.0148939	0.190082	0.714231	0.986988	456.151	0.00304625	0.337313	0.98815	0.99711
LTR86A2	ERVL	92.0239	0.0152537	0.193884	0.423201	0.926235	42.0911	-0.00173401	0.364279	0.961611	0.990908
MER127	TcMar-Tigger	70.053	-0.0060152	0.193416	0.675769	0.983086	100.643	0.0183391	0.361454	0.806256	0.961544
LTR33A_	ERVL	161.945	-0.0327183	0.196221	0.216701	0.791968	228.643	0.0109656	0.350222	0.926383	0.986042
MER94B	hAT-Blackjack	14.6691	-0.00421913	0.193838	0.468469		12.1164	-0.0186072	0.368666	0.149446
MER58C	hAT-Charlie	214.723	-0.015624	0.191784	0.63465	0.97491	279.758	0.0616225	0.353305	0.60757	0.9166
Charlie23a	hAT-Charlie	114.748	0.0140979	0.193243	0.54881	0.95751	91.9083	0.0260963	0.362373	0.720776	0.945611
MER117	hAT-Charlie	172.433	-0.0225691	0.193899	0.398724	0.920079	181.295	-0.0251913	0.35996	0.744602	0.950258
Helitron2Na_Mam	Helitron?	26.5877	0.006657	0.193913	0.361659
MER45A	hAT-Tip100	196.487	-0.0258315	0.194243	0.367734	0.905991	194.793	-0.0345634	0.361574	0.651141	0.926715
RLTR30D_MM	ERV1	97.5332	-0.00192085	0.192569	0.921406	0.998482	63.1058	-0.0368885	0.3668	0.495179	0.866189
Charlie15a	hAT-Charlie	75.4864	-0.0165687	0.194278	0.310704	0.86979	146.894	0.0493985	0.360906	0.592803	0.910048
L4_A_Mam	RTE-X	231.262	-0.0181271	0.19238	0.569445	0.961352	270.544	0.0178438	0.347995	0.883087	0.978668
L1PB4	L1	57.405	-0.00828112	0.193864	0.421705	0.926235	51.0717	-0.0348008	0.368807	0.362245	0.797194
X6A_LINE	CR1	27.7771	-0.00207892	0.193607	0.817713	0.993459	16.2876	-0.0185911	0.368671	0.125791
Charlie18a	hAT-Charlie	72.4899	-0.00197498	0.192987	0.902995	0.996162	118.35	0.0402805	0.365725	0.539528	0.883502
LTR33B	ERVL	61.6363	-0.00935539	0.193684	0.505208	0.948597	87.6293	0.00565565	0.360317	0.948386	0.988479
MER81	hAT-Blackjack	315.167	-0.0356704	0.194929	0.338055	0.886162	273.101	-0.0976748	0.370314	0.345019	0.785088
RLTR44D	ERVK	18.1895	-0.00324375	0.193691	0.694256		26.7498	0.00367792	0.365517	0.943887
LTR81	Gypsy	30.7796	0.0115789	0.194285	0.110307	0.620587
HERV16-int	ERVL	9.46407	-0.00448701	0.193862	0.401416		121.839	0.115405	0.393163	0.031168	0.245152
X6B_LINE	CR1	46.0689	-0.012774	0.194247	0.234289	0.810185	38.7573	-0.0446989	0.3716	0.0974537	0.441808
MamRep4096	hAT?	37.3731	-0.0135386	0.194464	0.0883814	0.558857	44.9551	-0.0306315	0.366301	0.550979	0.887668
MER70B	ERVL	133.498	-0.00345561	0.192921	0.846289	0.993459	105.088	-0.0329383	0.363525	0.624932	0.921105
MER67B	ERV1	116.374	-0.0136692	0.193324	0.527801	0.953544	122.051	-0.0237386	0.359361	0.764095	0.954502
Tigger19a	TcMar-Tigger	449.587	-0.023035	0.19054	0.593962	0.967361	373.788	-0.0943888	0.36012	0.438427	0.839002
ERVB5_2-LTR_MM	ERVK	122.858	0.00761089	0.192561	0.758545	0.987493	146.541	0.0447958	0.365075	0.537604	0.883321
MamRep434	TcMar-Tigger	220.027	-0.0601644	0.205794	0.049891	0.417584	296.134	-0.0160206	0.356839	0.847716	0.971287
Charlie16a	hAT-Charlie	38.5686	-0.00915798	0.19372	0.49449	0.945044	38.6536	-0.0213303	0.365735	0.653411	0.927078
LTR41	ERVL	204.199	-0.0263184	0.193936	0.395805	0.919267	244.039	-0.00036165	0.3501	0.989675	0.997475
RLTR20A1	ERVK	105.934	0.00620476	0.193191	0.736006	0.987493	37.6156	-0.0555244	0.373767	0.0595822	0.334728
MLT1D-int	ERVL-MaLR	108.122	0.0242225	0.195216	0.224681	0.803159	109.802	0.0859325	0.377578	0.200819	0.6341
MER113	hAT-Charlie	248.93	-0.0451981	0.198581	0.191071	0.764635	301.305	-0.0156468	0.353124	0.868293	0.977153
LTR53	ERVL	185.374	-0.0197393	0.193144	0.489737	0.944601	281.328	0.0754903	0.357883	0.520729	0.878501
ERVB4_3-I_MM-int	ERVK	9.99318	0.00307399	0.193738	0.69298		31.7535	0.0341547	0.369697	0.231231	0.673768
HAL1b	L1	248.75	-0.0187858	0.192034	0.578438	0.963473	505.751	0.296595	0.492264	0.0761111	0.384508
L1ME5	L1	75.4796	-0.0164282	0.194534	0.208737	0.78367	113.88	-0.00331016	0.362667	0.945058	0.988007
CR1_Mam	CR1	220.105	-0.0016257	0.192613	0.930958	0.998723	231.613	0.0208819	0.355024	0.837507	0.969735
MER102b	hAT-Charlie	289.953	-0.030917	0.193853	0.397017	0.919905	465.172	0.146386	0.371066	0.314805	0.756936
Tigger15a	TcMar-Tigger	272.587	-0.0314943	0.194546	0.35094	0.894522	328.405	0.00159855	0.349044	0.996087	0.99891
Charlie14a	hAT-Charlie	15.97	-0.00167766	0.193681	0.821539		9.73281	-0.0185744	0.368658	0.169056
L1MEa	L1	48.3213	-0.010361	0.193992	0.347833	0.891567	132.051	0.0565665	0.367386	0.440189	0.839704
LTR83	ERVL	91.6877	0.0142721	0.194044	0.376104	0.909457	92.8627	0.0458555	0.369195	0.372748	0.80404
FAM	Alu	70.8985	-0.00561994	0.193104	0.747746	0.987493	42.5739	-0.0389891	0.37017	0.22103	0.661218
MMERVK10D3_LTR	ERVK	64.8817	0.000739828	0.193058	0.976927	0.999215	134.903	0.10448	0.381352	0.201708	0.634491
LTR16A2	ERVL	116.497	-0.0152177	0.193244	0.520326	0.952409	175.496	0.0247623	0.361896	0.740034	0.94979
MamGypLTR3a	Gypsy	87.3515	-0.0141447	0.19391	0.402382	0.920741	158.773	0.0310937	0.362237	0.683829	0.935345
LTR16B1	ERVL	221.413	-0.0349802	0.19633	0.23514	0.810642	182.561	-0.13549	0.394047	0.134192	0.521343
RLTR13D3A	ERVK	121.711	0.00825084	0.192693	0.731376	0.987493	116.101	0.029563	0.361928	0.700869	0.940081
FordPrefect	hAT-Tip100	1086.74	0.0678247	0.20314	0.20555	0.78236	1566.89	1.15243	0.863669	0.00693711	0.110932
MER99	hAT?	76.3329	-0.0180397	0.194798	0.151264	0.704795	85.2378	-0.0339398	0.366395	0.527225	0.87981
RLTR13D1	ERVK	194.875	-0.00606249	0.192064	0.813161	0.993353	203.172	0.00758209	0.355059	0.944882	0.988007
LTR16A1	ERVL	231.082	-0.0163682	0.192813	0.552471	0.958504	178.863	-0.0762911	0.371081	0.330019	0.771278
LTR78	ERV1	386.313	-0.0236144	0.192335	0.514653	0.95028	351.924	-0.0430248	0.358499	0.639863	0.922518
MamRep1879	hAT-Tip100?	36.1935	-0.00392911	0.193402	0.766414	0.987898	44.9032	0.00555719	0.363844	0.930788	0.986738
MLT1J-int	ERVL-MaLR	145.088	-0.0224211	0.194222	0.361961	0.902786	213.427	0.0259176	0.356486	0.789447	0.95894
MER104	TcMar-Tc2	157.008	-0.0342428	0.196775	0.181216	0.750487	204.31	-0.0178398	0.352596	0.856814	0.974376
RMER16B	ERVK	40.629	0.00599173	0.193731	0.572533	0.962122	17.7628	0.00296807	0.366549	0.942211
LTR28B	ERV1	50.5156	-0.00102925	0.193451	0.918445	0.998211	39.9861	-0.010322	0.36577	0.795225	0.959489
RLTR48B	ERV1	160.046	0.000219518	0.191726	0.996688	0.999821	217.362	0.0566247	0.364319	0.50851	0.872693
MER67C	ERV1	380.878	0.0141448	0.189732	0.744466	0.987493	273.381	-0.0454153	0.350648	0.689528	0.937208
ERVB4_1-I_MM-int	ERVK	206.223	-0.0442114	0.200299	0.0566618	0.447364	330.568	0.00892766	0.353455	0.937063	0.987209
RLTR20C	ERVK	240.919	0.0289055	0.194306	0.376848	0.909967	177.116	0.0183113	0.362185	0.799285	0.960289
L1M3e	L1	624.514	-0.0226883	0.188477	0.649354	0.978769	807.308	0.121832	0.357375	0.40909	0.825053
RLTR22_Mus	ERVK	476.025	-0.0665579	0.204602	0.156532	0.712656	754.928	0.143091	0.359132	0.364018	0.798852
Eulor6B	DNA?	14.909	-0.00538868	0.193939	0.119718		45.6649	0.0239131	0.366048	0.634077	0.921453
RLTR12G	ERVK	419.114	-0.12954	0.260132	0.00513384	0.148671	486.117	-0.118644	0.367448	0.352166	0.788973
RLTR30D_RN	ERV1	29.6681	0.00647237	0.193861	0.441801	0.934938	28.0654	0.0265117	0.368432	0.401298	0.821586
LTR33C	ERVL	128.07	-0.0249413	0.194642	0.319317	0.875404	116.408	-0.0672663	0.368577	0.384968	0.812567
Charlie15b	hAT-Charlie	175.719	-0.0330356	0.196248	0.218953	0.794989	275.924	0.0335707	0.354777	0.748073	0.950596
MER126	DNA	51.5053	0.014326	0.1942	0.314658	0.872297	40.2892	0.0248008	0.367545	0.523044	0.878501
LTR84a	ERVL	36.8169	0.00290826	0.193479	0.826639	0.993459	22.1381	-0.00291901	0.366669	0.910624
Zaphod3	hAT-Tip100	103.143	0.00350647	0.19259	0.883936	0.994742	77.1565	-0.0111026	0.361256	0.864673	0.976784
LTR16E2	ERVL	132.303	-0.0441166	0.200544	0.0361208	0.372806	180.388	-0.0176711	0.361882	0.787072	0.958773
MER105	DNA	59.6214	-0.00501737	0.193364	0.726303	0.987148	68.7564	-0.000383438	0.36276	0.983834	0.994905
MLT1N2	ERVL-MaLR	263.937	0.000565428	0.191329	0.993457	0.999821	294.661	0.0560168	0.35541	0.618191	0.919986
Eulor11	DNA	5.02041	0.00529808	0.193924	0.220247		23.7889	0.0277874	0.369488	0.0440058
ORSL-2a	hAT-Tip100	6.78193	-0.00170196	0.193685	0.815927		4.1712	-0.0182933	0.368603	0.263284
IAPEY_LTR	ERVK	164.876	0.00229983	0.191666	0.943371	0.998866	191.112	0.0423532	0.360921	0.630124	0.921434
UCON29	PiggyBac?	52.2118	0.0132562	0.193927	0.410422	0.923712	70.3299	0.0699576	0.374332	0.216625	0.655037
MER124	DNA?	58.9542	0.00597813	0.19306	0.760112	0.987493	164.296	0.164595	0.416749	0.0459785	0.29496
MER76	ERVL	185.298	0.00101425	0.192451	0.97515	0.999215	149.011	-0.0186286	0.357132	0.825276	0.966086
RLTR35B_MM	ERVL	141.058	-0.00787711	0.192314	0.752964	0.987493	261.438	0.0970101	0.374133	0.306172	0.74842
MT-int	ERVL-MaLR	65743.9	0.0878307	0.155756	0.444665	0.936263	59821.4	0.121123	0.20966	0.484254	0.862758
RLTR8	ERVK	308.88	0.0243136	0.19285	0.491873	0.944743	277.827	0.0736929	0.358497	0.521635	0.878501
hAT-N1_Mam	hAT?	59.9831	-0.0170718	0.194803	0.0962331	0.582971	102.911	0.00156368	0.359704	0.993257	0.998295
MamRep488	hAT-Tip100	8.29605	0.00488252	0.193876	0.37508
X8_LINE	CR1	67.1576	0.00637091	0.193182	0.730354	0.987493	81.5372	0.0493076	0.366828	0.470555	0.855227
MER63B	hAT-Blackjack	236.492	-0.0104588	0.191038	0.755849	0.987493	171.158	-0.0828113	0.369236	0.365732	0.799818
Charlie17a	hAT-Charlie	26.903	-0.0103334	0.194068	0.28433		24.4848	-0.0242835	0.368381	0.392517
LTR88b	Gypsy?	89.7325	0.00517346	0.193208	0.770756	0.988003	49.4103	-0.0132629	0.365431	0.763363	0.954351
RLTR48C	ERV1	111.332	-0.0141751	0.193374	0.514399	0.95028	100.523	-0.0266693	0.365057	0.630084	0.921434
MLT1I-int	ERVL-MaLR	6.44676	0.00062399	0.193654	0.957325		2.68115	-0.0180277	0.368553	0.325112
L5	RTE-X	66.2924	0.00305117	0.192997	0.876546	0.99387	27.685	-0.0319394	0.36974	0.162156	0.574225
Tigger17	TcMar-Tigger	185.54	-0.0388646	0.197618	0.175617	0.744444	168.719	-0.102545	0.378125	0.243784	0.687511
MER65-int	ERV1	55.846	-0.0138264	0.194558	0.0120548	0.234967	69.6675	-0.0266765	0.366226	0.580909	0.905163
RLTR49	ERVK	279.745	-0.0148593	0.191413	0.658642	0.98171	619.553	0.382208	0.612469	0.0397315	0.276335
L1M2a	L1	102.604	-0.0107386	0.193037	0.616764	0.971532	219.626	0.105893	0.377414	0.270136	0.713347
MamGypLTR1d	Gypsy	21.9225	0.00545763	0.193769	0.555187		23.8876	0.0207415	0.367842	0.506464
MER67D	ERV1	202.364	-0.0122958	0.191732	0.691979	0.985053	249.629	0.0324892	0.356595	0.741706	0.950258
MER96	hAT-Tip100	17.4783	0.00267372	0.193702	0.755309		23.4834	0.0147883	0.367509	0.614405
ORSL	hAT-Tip100	47.3317	0.00236498	0.193185	0.895292	0.996153	83.6603	0.061552	0.370244	0.348448	0.787519
Charlie10b	hAT-Charlie	40.3258	-0.00555594	0.193558	0.650489	0.979068	25.8941	-0.0301452	0.36981	0.0389726
ERVB3_1-LTR_MM	ERVK	29.4501	-0.00850938	0.193857	0.427365	0.927235	50.9972	0.00856742	0.364297	0.882629	0.978668
LTR101_Mam	ERVL	33.3643	0.00352927	0.193474	0.792754	0.991059	42.5253	0.0270589	0.366642	0.575727	0.901705
MER97c	hAT-Tip100	30.5512	-0.00781627	0.193853	0.432426	0.930036	57.0064	0.0133348	0.363996	0.823836	0.966086
MER63C	hAT-Blackjack	164.405	-0.0099166	0.192313	0.704723	0.986988	271.992	0.093578	0.369219	0.37106	0.803309
UCON27	Unknown	58.2358	-0.00388514	0.193367	0.775225	0.988334	107.119	0.0408237	0.365477	0.544371	0.885391
RLTR41B	ERV1	125.931	0.0187567	0.193888	0.418686	0.925	70.5773	0.00508392	0.361565	0.950235	0.988479
LTR40A1	ERVL	94.8906	-0.00986779	0.19353	0.543763	0.956214	61.1263	-0.0681564	0.377483	0.00100011	0.0353121
Eulor9C	DNA	7.65286	-3.93132e-05	0.193651	0.985197		5.22304	-0.0065902	0.367034	0.807032
MLT1B-int	ERVL-MaLR	46.1244	-0.0196504	0.195149	0.072859	0.507759	55.7286	-0.0284134	0.36583	0.586505	0.907777
RMER16A2	ERVK	362.978	-0.0465372	0.197719	0.246904	0.821586	511.974	0.060653	0.345962	0.65019	0.926331
RLTR10E	ERVK	106.025	0.00164931	0.192305	0.952646	0.999131	115.578	0.0305548	0.360234	0.717308	0.945031
MER5C	hAT-Charlie	87.875	0.0152888	0.193586	0.482872	0.944601	107.648	0.0816819	0.374155	0.277525	0.720992
ERVB5_1-I_MM-int	ERVK	406.643	-0.0288958	0.194742	0.32956	0.881054	581.48	0.0626357	0.342114	0.657625	0.92745
L1M8	L1	69.0813	-0.00305111	0.193262	0.830908	0.993459	64.0728	-0.00976634	0.36382	0.850391	0.972105
L1M7	L1	87.1617	0.0125962	0.193579	0.509647	0.948929	60.2602	0.0169431	0.364136	0.776724	0.956363
RMER16C	ERVK	187.384	-0.0283508	0.194687	0.332965	0.88288	163.08	-0.0652739	0.368311	0.392217	0.817546
Charlie4z	hAT-Charlie	221.149	0.0116236	0.191231	0.740101	0.987493	247.894	0.090422	0.364094	0.428628	0.834501
LTR86A1	ERVL	37.4525	-0.000105003	0.193417	0.980285	0.999215	48.9341	0.0113647	0.366063	0.794308	0.95932
RMER6-int	ERVK	660.948	-0.0515288	0.196394	0.310077	0.869787	631.353	-0.0810505	0.349011	0.544739	0.885391
Charlie26a	hAT-Charlie	76.2892	0.0139446	0.19396	0.401671	0.920556	15.9399	-0.018603	0.368671	0.127411
LTR73	ERV1	22.1007	-0.00436184	0.19369	0.638328		23.4332	-0.00994531	0.366166	0.786771
RLTR30B_MM	ERV1	269.515	-0.0105679	0.191	0.754958	0.987493	267.556	-0.00362663	0.349239	0.966173	0.991142
Tigger16b	TcMar-Tigger	96.4029	-0.0101976	0.192963	0.635564	0.975487	126.328	0.0222622	0.358141	0.805388	0.961544
LTR82A	ERVL	97.8534	0.0118661	0.193027	0.61253	0.969872	136.409	0.0978917	0.377829	0.245127	0.68863
Eulor4	Unknown	30.8273	0.00524968	0.193749	0.580961	0.96374	5.5616	-0.0184038	0.368626	0.227876
L1M6	L1	60.2749	-0.00617504	0.193087	0.731463	0.987493	78.5302	0.0151912	0.362061	0.83167	0.967711
Tigger11a	TcMar-Tigger	93.2211	-0.00905567	0.193482	0.571332	0.962122	73.0514	-0.0413407	0.368684	0.382884	0.811321
RLTR53_Mm	ERVK	223.69	-0.0262452	0.193638	0.421291	0.926235	361.62	0.117928	0.365546	0.374905	0.805804
MER96B	hAT-Tip100	99.8571	-0.0072775	0.193031	0.700378	0.986921	118.808	0.00621151	0.36166	0.937869	0.987209
LTR16E1	ERVL	299.218	-0.02178	0.192876	0.495895	0.945044	459.45	0.114794	0.36313	0.39533	0.819409
RLTR19D	ERVK	9.19197	0.000312098	0.193651	0.982281		26.7603	0.0180393	0.367782	0.534402
Tigger9a	TcMar-Tigger	48.3261	-0.0140615	0.194426	0.164361	0.725868	40.9295	-0.051682	0.373242	0.0292254	0.237159
LTR106_Mam	LTR	64.7102	-0.0176243	0.194808	0.126242	0.657804	98.0334	-0.0105731	0.360954	0.872459	0.977581
L1MEg2	L1	184.385	-0.035894	0.196907	0.19426	0.768568	206.254	-0.0503188	0.358091	0.606521	0.9166
MLT2F	ERVL	498.603	0.0142287	0.188741	0.761983	0.987493	436.338	0.0199786	0.342016	0.882386	0.978668
LTR79	ERVL	48.9072	-0.00369464	0.193386	0.780829	0.98845	78.6436	0.0264996	0.364209	0.677309	0.934058
LTR52	ERVL	141.795	-0.00991821	0.192363	0.701241	0.986988	143.304	-0.00978677	0.356704	0.903278	0.981072
LTRIS4B	ERV1	73.499	0.0156593	0.193978	0.39995	0.920304	27.0715	-0.00980634	0.36545	0.815669	0.963026
MER54B	ERVL	62.3274	-0.00351333	0.193317	0.800374	0.99225	42.2718	-0.0204312	0.367495	0.536675	0.883321
Charlie25	hAT-Charlie	10.4956	-9.17862e-05	0.19365	0.9785		152.599	0.13226	0.403364	0.00510181	0.092407
RLTR19C	ERVK	270.793	0.0104768	0.190907	0.773277	0.988334	259.922	0.046408	0.352692	0.685461	0.935521
MLT1C-int	ERVL-MaLR	41.9969	-0.00236086	0.193526	0.821462	0.993459	82.824	0.0218629	0.366302	0.64332	0.924058
UCON31	Unknown	21.2786	-0.00642356	0.193858	0.429128		16.9315	-0.0199458	0.368775	0.111903
RLTR31B_Mm	ERVK	229.952	-0.0272732	0.19485	0.310228	0.869787	294.424	-0.00241283	0.345889	0.976667	0.992537
UCON7	DNA?	5.41622	-0.0051099	0.193924	0.222257		4.91545	-0.018357	0.368617	0.242756
MLTR13	ERVK	199.742	-0.0252792	0.194899	0.286749	0.850645	155.742	-0.129691	0.396366	0.0755642	0.382816
MURVY-LTR	ERV1	940.586	-0.00933901	0.185868	0.856597	0.993459	891.835	0.00431922	0.320515	0.983648	0.994905
LTR37B	ERV1	154.165	0.00167027	0.191901	0.959837	0.999131	189.934	0.0516978	0.362229	0.562908	0.89408
Tigger17b	TcMar-Tigger	35.944	-0.00872245	0.194121	0.0240937	0.312582	62.6048	-0.00159567	0.364289	0.962675	0.990908
MER74C	ERVL	30.8686	-0.0121603	0.194359	0.0708314	0.501663	55.9803	0.00210918	0.363858	0.981109	0.994018
LTR75B	ERVL	35.8662	0.0013634	0.193426	0.927226	0.998482	21.3136	-0.00980377	0.366677	0.760545
LTR88c	Gypsy?	22.7792	-0.00500749	0.193823	0.486377		59.2909	0.0167218	0.366294	0.702894	0.941013
MER57D	ERV1	185.545	-0.00690598	0.191956	0.796779	0.991816	95.3837	-0.0974702	0.387241	0.00329279	0.0726076
Kanga1	TcMar-Tc2	58.537	0.00891495	0.193665	0.537916	0.955883	54.1996	0.0281218	0.366834	0.557742	0.890215
MER91B	hAT-Tip100	121.359	-0.00855921	0.192483	0.723997	0.987148	197.859	0.084082	0.367247	0.405031	0.823495
LTR107_Mam	LTR	47.1898	0.00806799	0.193703	0.53762	0.955883	22.1414	0.00214585	0.366629	0.96213
Tigger2b	TcMar-Tigger	207.373	-0.0292691	0.194634	0.341075	0.888275	309.328	0.0622877	0.351986	0.612774	0.918272
Tigger10	TcMar-Tigger	154.172	0.0125336	0.192417	0.659098	0.98171	158.543	0.052236	0.362732	0.552631	0.888241
MLT1H1-int	ERVL-MaLR	93.4485	0.00435407	0.192791	0.842398	0.993459	61.5323	-0.0153884	0.363631	0.784297	0.958248
Charlie13b	hAT-Charlie	52.6083	-0.00538087	0.193455	0.689754	0.985053	52.5025	-0.0150259	0.364074	0.779102	0.956363
Tigger14a	TcMar-Tigger	16.5957	0.00492696	0.193804	0.530347		65.3425	0.0791372	0.38002	0.0294742	0.238095
Helitron3Na_Mam	Helitron	49.897	-0.0133106	0.19428	0.232574	0.810185	103.251	0.0311969	0.361325	0.697077	0.939114
MLT1F-int	ERVL-MaLR	211.255	0.00882695	0.191703	0.778073	0.98845	138.863	-0.0343386	0.360201	0.673286	0.933431
HAL1_SS	L1	31.5264	-0.000411956	0.193464	0.959721	0.999131	21.2576	-0.00988468	0.366852	0.745154
MER134	DNA?	17.1579	-0.0051208	0.193811	0.499432		17.0316	-0.0127255	0.36731	0.649622
L1M3c	L1	235.865	0.0334161	0.195154	0.325507	0.877957	183.84	0.0575663	0.359469	0.572324	0.899907
MamTip3	hAT-Tip100	39.6787	-0.0117327	0.194071	0.320979	0.87602	145.602	0.0811481	0.374876	0.257064	0.701111
X7A_LINE	CR1	15.3077	0.00435796	0.193774	0.586959		22.4196	0.0239529	0.368364	0.405099
Kanga2_a	TcMar-Tc2	170.788	-0.0215201	0.194848	0.24161	0.816417	190.522	-0.05923	0.363179	0.503899	0.870293
MamRep38	hAT	138.718	-0.00844571	0.192341	0.736962	0.987493	240.922	0.110099	0.37503	0.303834	0.74534
MER97b	hAT-Tip100	17.5191	-0.00541528	0.193921	0.240535		15.493	-0.0186264	0.368672	0.12957
Kanga11a	TcMar-Tc2	233.97	-0.00657625	0.192036	0.799281	0.99225	328.797	0.092303	0.363217	0.433019	0.835886
LTR82B	ERVL	68.1919	-0.0235792	0.195902	0.0127989	0.242599	102.002	-0.0139115	0.363409	0.804511	0.961544
Charlie22a	hAT-Charlie	24.3473	-0.00857147	0.19411	0.0362624		31.583	-0.0175694	0.366122	0.676566	0.933756
LTR41B	ERVL	194.2	-0.0105138	0.191762	0.72468	0.987148	364.805	0.199193	0.416737	0.140431	0.535082
MLT1M	ERVL-MaLR	265.467	0.036039	0.195453	0.317035	0.874145	197.36	0.0443109	0.357027	0.663668	0.929376
Zaphod2	hAT-Tip100	17.976	-0.00771226	0.193975	0.288592		19.9142	-0.0155566	0.367022	0.639206
LTR84b	ERVL	125.322	-0.032026	0.197229	0.0668367	0.488826	174.042	-0.0350319	0.356109	0.713533	0.944344
RLTR1F_Mm	ERVK	4.15735	-0.00453534	0.193867	0.401997		30.482	0.0218938	0.368167	0.444622	0.841997
MER110-int	ERV1	18.6072	-0.00809329	0.194065	0.10705		17.3428	-0.0222222	0.368733	0.255753
RMER16B3	ERVK	8.75329	0.00137059	0.193666	0.87926		132.671	3.91871	2.48512	0.0012377	0.0406239
UCON19	Unknown	12.1988	0.00545524	0.193934	0.135093		3.95454	0.0189756	0.368615	0.237563
LTR86C	ERVL	33.6819	-0.00154135	0.19355	0.871053	0.993459	18.2738	-0.0186921	0.36868	0.117423
LTR65	ERV1	84.9409	-0.00818277	0.193016	0.681837	0.984012	175.01	0.090077	0.373134	0.31466	0.756927
RLTR20A2	ERVK	195.365	0.052963	0.204349	0.00443723	0.136027	51.5883	0.0371511	0.36797	0.447676	0.843041
RLTR19A	ERVK	129.309	-0.0175531	0.194105	0.363868	0.903652	152.275	-0.0212675	0.359896	0.77869	0.956363
MLT1F2-int	ERVL-MaLR	144.025	0.00559063	0.19188	0.848985	0.993459	132.507	0.0145071	0.359714	0.862063	0.976084
Eulor5A	DNA?	43.8723	-0.000243562	0.193219	0.976123	0.999215	20.4089	-0.0230524	0.369046	0.0788083
LTR85b	Gypsy?	25.4379	-0.00879828	0.194081	0.166537		72.5885	0.0325503	0.365541	0.589091	0.908561
LTR86B2	ERVL	6.13219	-0.00501767	0.193921	0.208218		6.22069	-0.0144447	0.367926	0.506857
MER106A	hAT-Charlie	76.0931	-0.016581	0.194567	0.199617	0.774928	111.529	-0.00623758	0.362835	0.906304	0.981691
UCON13	Penelope?	30.9162	-0.0112815	0.194247	0.138267	0.684248	47.7664	-0.00777046	0.36373	0.87909	0.978484
UCON20	Unknown	17.2334	-0.00517837	0.193931	0.11617		15.6401	-0.0186252	0.368672	0.128874
MER58D	hAT-Charlie	206.382	0.00183723	0.191985	0.963382	0.999215	148.498	-0.0354279	0.360775	0.658037	0.92745
X7C_LINE	CR1	192.415	0.0100205	0.191486	0.761445	0.987493	137.383	-0.0187632	0.358	0.817995	0.963459
MMTV-int	ERVK	41.0932	0.00194917	0.193511	0.88179	0.994505	15.8226	-0.0178506	0.368515	0.237291
RLTR46A	ERVK	27.5891	0.00102503	0.193575	0.934098	0.998723	11.6314	-0.017076	0.368369	0.330394
ERV3-16A3_LTR	ERVL	168.617	-0.00791655	0.191974	0.771205	0.988003	160.259	-0.0141798	0.355942	0.8689	0.97743
MER73	ERVL	1172.91	0.044377	0.188069	0.496689	0.945045	1189.04	0.210447	0.360042	0.259849	0.703746
LTR87	ERVL?	113.533	0.00491785	0.192472	0.842704	0.993459	83.5003	-0.00585318	0.363793	0.903517	0.981072
Kanga1d	TcMar-Tc2	93.2056	-0.0284636	0.196843	0.0104544	0.220753	83.6278	-0.0896739	0.384033	0.00838646	0.124207
Eulor2A	DNA?	8.3077	0.000392294	0.193651	0.974127		3.57532	-0.0182128	0.368588	0.28376
MER68C	ERVL	13.5183	0.00456225	0.193812	0.526885
MamGypLTR1a	Gypsy	49.0834	0.00364857	0.193424	0.797941	0.991816	17.8033	-0.0166582	0.368292	0.366525
LTR108a_Mam	ERVL	19.9216	-0.00457407	0.193819	0.499345		15.8903	-0.0186051	0.368671	0.127646
ERVB4_3-LTR_MM	ERVK	28.3995	0.0042293	0.193694	0.666298	0.982717	33.4932	0.0188709	0.367506	0.571045	0.898921
MMSAT4	Satellite	38069.4	0.153499	0.179405	0.189366	0.763307	47369.8	0.928033	0.248931	1.76346e-05	0.00174701
Eulor8	TcMar?	204.193	0.0392812	0.197323	0.21145	0.787879	84.2265	-0.0238296	0.361796	0.732554	0.949136
MLT1E2-int	ERVL-MaLR	53.4646	-0.019063	0.19523	0.00101464	0.0598345	74.7988	-0.0281345	0.363788	0.655067	0.927164
MER95	ERV1	15.4978	0.00550417	0.193937	0.117094
Charlie10a	hAT-Charlie	58.2523	-0.0170122	0.194503	0.240015	0.815318	68.0507	-0.0301802	0.364034	0.63343	0.921434
Tigger12c	TcMar-Tigger	68.9026	0.0213707	0.195544	0.00934631	0.210513
Tigger12A	TcMar-Tigger	12.2236	0.00545312	0.193934	0.13483		23.6585	0.0273134	0.369435	0.0458997
LTR16D	ERVL	159.137	-0.00471626	0.191842	0.853955	0.993459	149.913	-0.00681431	0.356412	0.930401	0.986738
SUBTEL_sa	Satellite	19.3132	-0.00681456	0.194006	0.0691128		19.9262	-0.0231589	0.368187	0.423722
MER102a	hAT-Charlie	79.4746	-0.0185674	0.194835	0.159557	0.717081	93.7881	-0.0480838	0.364981	0.509958	0.873568
MER68-int	ERVL	138.644	-0.0221908	0.194207	0.363506	0.903652	263.58	0.0889517	0.366463	0.407364	0.824822
LTR81A	Gypsy	105.115	-0.00222949	0.193059	0.886536	0.995031	93.8949	-0.00553082	0.364713	0.896077	0.980079
RLTR13D	ERVK	57.8584	0.0113633	0.194195	0.216037	0.791953	14.518	0.00918949	0.36715	0.758826
MER91A	hAT-Tip100	193.495	-0.00823451	0.191881	0.767822	0.988003	227.789	0.0298354	0.355354	0.768059	0.954996
MamRep1527	LTR	26.9411	0.00404673	0.193477	0.764468		92.741	0.113455	0.391046	0.0572512	0.326716
L1M6B	L1	5.03715	-0.00510538	0.193923	0.230585		4.56846	-0.0183126	0.36861	0.251695
L1MEj	L1	463.904	0.0494414	0.197111	0.290592	0.852701	378.941	0.0829816	0.352712	0.530382	0.881403
FordPrefect_a	hAT-Tip100	9.57582	-0.0051528	0.193928	0.163526		21.2119	0.00538925	0.366388	0.891975
LTR105_Mam	ERVL	122.27	-0.000127897	0.192134	0.987375	0.999821	83.9232	-0.0228715	0.364922	0.668128	0.932041
RLTR5_Mm	ERV1	5.80073	-0.00393419	0.193815	0.525494		96.1979	0.0686538	0.376629	0.0655725	0.354384
X5A_LINE	CR1	7.42221	0.00506195	0.193897	0.298208
MLT1H2-int	ERVL-MaLR	8.92596	0.00540438	0.193931	0.161616		12.1861	0.0196889	0.368704	0.127698
L1M3d	L1	99.012	0.0171785	0.193638	0.462334	0.939581	110.77	0.0408937	0.367297	0.47728	0.858672
RNERVK23-int	ERVK	16.2487	-0.00514028	0.193929	0.12036		16.7236	-0.0139728	0.367856	0.527409
LTR75	ERVL	4.76051	0.00528542	0.193923	0.226757		37.6157	0.0435762	0.371786	0.0082259	0.123122
MamGypLTR2b	Gypsy	61.3228	-0.0171737	0.194818	0.0918232	0.569226	99.3527	-0.00588204	0.360103	0.927411	0.986123
MamGypLTR1b	Gypsy	3.5782	-0.00169337	0.193686	0.823314		70.8073	0.08865	0.383315	0.0190129	0.194523
MLT1J2-int	ERVL-MaLR	9.8549	0.00488994	0.193878	0.362742
MLT1J1-int	ERVL-MaLR	72.0396	0.0173674	0.194694	0.178582	0.748226	7.15063	-0.0184894	0.368643	0.19986
MamTip1	hAT-Tip100	14.64	0.00213191	0.193689	0.805649		17.7398	0.0107484	0.367299	0.710086
MLTR31C_MM	ERVK	147.801	-0.0105666	0.192325	0.690045	0.985053	208.217	0.0483319	0.360126	0.608769	0.9166
Charlie17b	hAT-Charlie	62.3456	-0.0173746	0.194383	0.290055	0.852651	85.5582	-0.00385915	0.363551	0.93308	0.986837
MER110	ERV1	27.8763	0.004218	0.193617	0.708356	0.986988	164.771	0.169984	0.427352	0.0042892	0.0834734
Tigger20a	TcMar-Tigger	64.1671	-0.0185834	0.195008	0.0758181	0.519263	155.574	0.0413967	0.363121	0.599233	0.912783
MER125	DNA	151.307	-0.0397746	0.199212	0.0446169	0.403418	141.049	-0.0746132	0.375824	0.177686	0.599972
DNA1_Mam	TcMar	9.19828	-0.00515037	0.193928	0.167196		8.34241	-0.0185328	0.368651	0.183978
Ricksha	MULE-MuDR	29.4964	-0.0121173	0.194366	0.0552039	0.442313	29.6615	-0.0280757	0.368616	0.361315	0.79651
RLTR46B	ERVK	19.9572	0.00344376	0.193721	0.687707		4.24516	-0.0183006	0.368605	0.261166
LTR86B1	ERVL	27.5948	-0.00705888	0.19402	0.0491807	0.415614	33.5954	-0.0133845	0.366936	0.677258	0.934058
ERVB5_1-LTR_MM	ERVK	60.836	-0.00648693	0.19347	0.645296	0.978532	129.484	0.0718943	0.368619	0.393989	0.818141
MLT1A0-int	ERVL-MaLR	79.0408	0.00861958	0.193413	0.62194	0.973177	99.6328	0.0645316	0.370576	0.342087	0.782189
MER113A	hAT-Charlie	26.061	0.00665671	0.193809	0.494389		40.3087	0.0279354	0.368735	0.354243	0.791771
Tigger12	TcMar-Tigger	112.122	0.00447335	0.192278	0.863535	0.993459	70.1922	-0.0308928	0.364096	0.626468	0.921105
MamGypLTR3	Gypsy	186.989	-0.0321608	0.197328	0.0559292	0.445921	211.622	-0.0522159	0.367015	0.442593	0.840944
Eulor9A	DNA	23.6411	-0.00479781	0.193797	0.525505		38.8078	0.00318125	0.365296	0.956113	0.989275
LTR9	ERV1	6.13219	-0.00501767	0.193921	0.208218		5.5616	-0.0184038	0.368626	0.227876
MamRep564	Unknown	90.3306	-0.00301171	0.193094	0.851566	0.993459	95.4727	0.00252495	0.363149	0.978328	0.993183
X5B_LINE	CR1	17.791	-0.00643688	0.19394	0.281719		50.2758	0.0183681	0.366169	0.687945	0.936506
LTR81C	Gypsy	56.387	-0.00367219	0.193326	0.792387	0.991059	31.816	-0.0416237	0.371316	0.0600623	0.33661
Tigger8	TcMar-Tigger	51.6591	-0.0122025	0.193917	0.398372	0.920079	74.2329	0.0010485	0.364138	0.997494	0.999216
MER113B	hAT-Charlie	55.2894	0.0249531	0.196137	0.0138187	0.252453	29.348	0.0318064	0.369603	0.199727	0.632868
Charlie20a	hAT-Charlie	58.7447	0.00949221	0.193958	0.374843	0.908749	134.142	0.106025	0.389377	0.0294832	0.238095
Tigger6b	TcMar-Tigger	197.913	-0.0335949	0.195744	0.272428	0.840161	192.939	-0.0527233	0.36311	0.528658	0.880483
MER92A	ERV1	8.86291	-0.00514775	0.193928	0.170736		33.748	0.0158005	0.367108	0.652235	0.926715
LTR103b_Mam	ERV1?	12.7024	-0.00518405	0.19393	0.139162		12.1796	-0.0165269	0.36827	0.373685
MLT1A-int	ERVL-MaLR	34.3669	-0.000766641	0.193464	0.935739	0.998723	44.3169	0.0106268	0.365643	0.821846	0.96552
LTR109A2	ERV1	14.0329	-0.00517316	0.19393	0.131318		31.5195	0.00592667	0.366357	0.883463	0.978668
UCON28b	Unknown	22.7265	0.00238229	0.193644	0.809966		16.611	0.00368507	0.366803	0.917243
MER97a	hAT-Tip100	17.0512	0.00071397	0.193647	0.948351		6.95201	-0.0184822	0.368641	0.202868
IAPEY4_LTR	ERVK	10.2844	-0.0033543	0.193771	0.619756		18.9506	0.00504433	0.366505	0.895242
MER34B-int	ERV1	262.492	0.00620913	0.190599	0.867808	0.993459	216.516	-0.00796861	0.3514	0.932329	0.986837
MER50-int	ERV1	36.1496	-0.0147893	0.194652	0.019382	0.288113	32.7539	-0.0439481	0.371803	0.0337467	0.254394
LTR37-int	ERV1	236.955	-0.0211648	0.192784	0.507425	0.948758	318.914	0.0465948	0.353328	0.68057	0.934489
ERVB2_1-I_MM-int	ERVK	35.6507	-0.0125641	0.194138	0.297628	0.860361	98.7105	0.0553747	0.367384	0.441272	0.840409
LTR69	ERVL	17.4808	-0.000847103	0.193652	0.90526		12.1437	-0.00986748	0.367312	0.701376
LTR28	ERV1	39.8831	-0.00947172	0.194174	0.0174779	0.279156	36.1956	-0.0282349	0.369593	0.0334501	0.253363
L1MEg1	L1	40.2163	0.0108819	0.194066	0.315255	0.872297	55.9775	0.0356175	0.369691	0.261602	0.705084
RLTR12F	ERVK	60.9421	0.018264	0.195007	0.0558366	0.445402
Charlie6	hAT-Charlie	130.051	0.0138405	0.193309	0.542974	0.955883	42.8184	-0.0503221	0.372	0.160874	0.573161
RLTR12B2	ERVK	17.8966	-0.00532716	0.193911	0.272335		42.0553	0.00916369	0.366148	0.828986	0.966873
IAPLTR4_I	ERVK	145.636	-0.000480683	0.192665	0.960725	0.999171	151.926	0.0169581	0.358692	0.846638	0.971287
MamRep1894	hAT	21.3191	-0.0078802	0.194066	0.0486165		20.6587	-0.0239402	0.368693	0.307781
LTR108b_Mam	ERVL	8.76027	-0.00514713	0.193928	0.171782		7.94515	-0.0185255	0.368649	0.188899
RLTR46	ERVK	24.0907	-0.00629498	0.19398	0.0678446		21.8492	-0.0187037	0.368683	0.105305
MERX	TcMar-Tigger	5.51388	-0.00027375	0.193654	0.964781		7.29478	0.00537407	0.366901	0.864952
Eulor3	DNA?	23.596	0.0023205	0.193638	0.817243		7.37317	-0.0185041	0.368645	0.196695
LTR108e_Mam	ERVL	56.9807	0.0185921	0.195041	0.0597454	0.459844	38.2877	0.0414955	0.370753	0.175825	0.598122
MLT1A1-int	ERVL-MaLR	13.4092	-0.00516916	0.19393	0.134853		52.2992	0.0438536	0.368032	0.43436	0.836638
RLTR4_Mm	ERV1	1179.16	0.0202737	0.185618	0.729627	0.987493	1167.08	0.140946	0.32921	0.433027	0.835886
LTR32	ERVL	12.0634	-0.0051122	0.193927	0.14342		10.948	-0.0185681	0.368661	0.158335
L1M3f	L1	13.8349	-0.00059609	0.193654	0.928947		7.15063	-0.0184894	0.368643	0.19986
MER70-int	ERVL	6.40099	-0.00512537	0.193925	0.203649		5.80916	-0.0184235	0.368629	0.222926
HERVL74-int	ERVL	94.1227	-0.0110011	0.193992	0.353395	0.89617	176.831	0.0211631	0.362232	0.770836	0.954996
Tigger1a_Art	TcMar-Tigger	7.13957	-0.00513391	0.193926	0.192121		6.47945	-0.0184661	0.368637	0.210614
X2_LINE	CR1	135.318	-0.0214822	0.19522	0.135012	0.678418	165.647	-0.0485701	0.363185	0.544962	0.885488
UCON2	Unknown	16.9593	-0.0054085	0.19393	0.186333		24.75	-0.00459094	0.366622	0.87212
MER91C	hAT-Tip100	22.0957	-0.0021283	0.19365	0.798392		14.8249	-0.0151932	0.368041	0.465455
LTR16D1	ERVL	32.9339	-0.00912069	0.194131	0.0831218	0.54449	29.4927	-0.0238569	0.369129	0.0564494	0.324305
MER129	LTR?	10.2868	-0.00312897	0.193755	0.651395		8.66693	-0.013576	0.367793	0.551199
LTR16D2	ERVL	14.2233	-0.00485336	0.193897	0.291127		43.7579	0.0187928	0.366455	0.665936	0.931212
LTR45C	ERV1	20.0912	-0.00729879	0.194032	0.0590902		49.5428	0.0199307	0.364409	0.735343	0.949266
LTR59	ERV1	5.66241	-0.00511864	0.193924	0.217189		5.13887	-0.0183834	0.368621	0.237361
MLT1G3-int	ERVL-MaLR	100.687	0.0136274	0.193143	0.568359	0.961114	87.0684	0.0334954	0.362633	0.657514	0.92745
UCON17	Unknown	22.7767	-0.00601096	0.193967	0.0767699		20.6574	-0.018693	0.368682	0.108996
UCON16	Unknown	26.8992	0.00165449	0.193594	0.882321		9.83089	-0.0185766	0.368659	0.168165
MLT1G-int	ERVL-MaLR	28.107	0.00948436	0.194166	0.0251997	0.319747	3.21966	0.0187854	0.36859	0.262639
MER50	ERV1	4.16113	-0.00508178	0.193921	0.253911		3.77395	-0.0182529	0.368594	0.276457
Helitron1Na_Mam	Helitron	13.1404	-0.00516538	0.19393	0.136442		58.7131	0.0253588	0.367514	0.524576	0.87862
Eulor6D	DNA?	83.194	-0.01447	0.194141	0.329518	0.881054	69.7909	-0.0516436	0.371383	0.234443	0.67774
RLTR3_Mm	ERVK	24.3758	0.00678509	0.19385	0.452994		3.76252	-0.0117485	0.367555	0.629334
RLTR46A2	ERVK	8.49792	-0.000268259	0.193652	0.962758		4.60591	-0.0145226	0.367943	0.504124
MLT1E-int	ERVL-MaLR	7.85804	0.00539623	0.19393	0.173319
C573_MM	Other	9.84768	-0.00515468	0.193928	0.160991		8.93717	-0.0185556	0.368655	0.177248
GSAT_MM	Satellite	51913.6	-0.100301	0.180164	0.324523	0.877417	29176.6	-2.87447	0.259374	6.1254e-30	9.95193e-26
MLT1L-int	ERVL-MaLR	43.5363	-0.00937549	0.193865	0.421413	0.926235	32.3736	-0.037168	0.370772	0.01901	0.194523
LTR39	ERV1	13.0967	0.00546655	0.193935	0.129472
Eulor2B	DNA?	24.5288	-0.00639691	0.193985	0.0651301		22.2464	-0.0188758	0.368697	0.102702
RLTR47_MM	ERV1	12.4782	0.00545851	0.193934	0.133278		6.43931	0.0193107	0.368659	0.183355
UCON23	hAT?	16.1672	0.00260159	0.193709	0.755116		3.97257	-0.0182535	0.368598	0.26965
RNLTR23	ERVK	5.91318	-0.0050257	0.193921	0.212229		5.36298	-0.0183882	0.368623	0.232153
MER34-int	ERV1	27.3649	-0.0058137	0.193846	0.445016	0.936263	90.8032	0.0413986	0.36766	0.458992	0.848281
MLT1N2-int	ERVL-MaLR	28.5583	-0.00724329	0.19403	0.045444	0.404442	68.7586	0.0117116	0.365579	0.808155	0.961806
MARINER1_EC	TcMar-Tigger	12.0454	-0.00504365	0.193925	0.143507		25.873	0.00446584	0.366507	0.911426
MurSAT1	Satellite	100.534	-0.030001	0.197324	2.56867e-05	0.00504635	109.589	-0.0631186	0.37242	0.252174	0.696943
LTR85c	Gypsy?						9.63278	0.0159794	0.368033	0.476003
MER72B	ERV1						34.2727	0.02863	0.36959	0.0303348	0.241593
MER57E2	ERV1						4.59951	0.0190859	0.36863	0.219273
LTR88a	Gypsy?						7.15042	0.0193751	0.368667	0.173379
UCON25	Unknown						15.8182	0.0198289	0.368719	0.109121
UCON10	Unknown						60.9435	0.0454178	0.372132	0.00393962	0.0805208
X9_LINE	L1?						20.1022	0.0199506	0.368731	0.0939946
MER92C	ERV1						2.96888	-0.0010215	0.366807	0.966307
LTR52-int	ERVL						7.90908	0.0194385	0.368675	0.163914
MLT1F1-int	ERVL-MaLR						17.197	0.0238102	0.368927	0.197285
Mam_R4	Dong-R4						62.6998	0.0448616	0.371644	0.0946225	0.435258
LTR90B	LTR						21.2935	0.0238758	0.368659	0.325513
MER123	DNA						34.6562	0.0367735	0.37029	0.152382	0.558103
MLT1G1-int	ERVL-MaLR						6.26135	0.019288	0.368657	0.186486
RLTR9A4	ERVK						11.2045	0.0196417	0.368698	0.134212
UCON21	DNA?						5.93181	0.0192527	0.368652	0.192028
MER31-int	ERV1						29.4282	0.0394818	0.370928	0.0681365	0.362243
LTR9A1	ERV1						15.4084	0.0198166	0.368717	0.110801
SYNREP_MM	Satellite						3.53008	0.00934015	0.367223	0.736843
UCON12A	Unknown						3.67961	0.0188959	0.368606	0.245751
MER4B-int	ERV1						46.8314	0.0555871	0.374228	0.00254853	0.0624824
L1M3a	L1						4.96746	0.0174046	0.36831	0.354835
X7D_LINE	CR1						10.5454	0.0196092	0.368695	0.139056
L1M2a1	L1						11.8636	0.0196679	0.368702	0.129767
MER51-int	ERV1						8.23862	0.0194636	0.368678	0.160194
