# Supplementary material for: Obox4 promotes zygotic genome activation upon loss of Dux
Source: eLife. 2024 Jun 24;13:e95856. doi: 10.7554/eLife.95856 (PMC11196112; doi:10.7554/eLife.95856)
Supplement: Supplementary file 8. [file elife-95856-supp8.xlsx]

## Sheet: Genes
# Supplementary Table 8
# Gene expression in mESC Obox induced versus non-induced
Geneid	symbol	baseMean_Obox4OE	log2FoldChange_Obox4OE	lfcSE_Obox4OE	pvalue_Obox4OE	padj_Obox4OE	baseMean_Obox3OE	log2FoldChange_Obox3OE	lfcSE_Obox3OE	pvalue_Obox3OE	padj_Obox3OE	baseMean_Obox5OE	log2FoldChange_Obox5OE	lfcSE_Obox5OE	pvalue_Obox5OE	padj_Obox5OE
ENSMUSG00000051951		3.26	0.101179	0.371888	0.324212	0.702395
ENSMUSG00000025902	Sox17	26.9929	1.19166	0.452032	0.00014875	0.00280905	1.79536	-0.202266	0.517275	0.0391955	0.249969	1.79536	0.0060011	0.370306	0.955891
ENSMUSG00000098104	Gm6085	2.3813	-0.143196	0.42429	0.202245	0.570739	1.75532	0.0853103	0.455335	0.404014	0.780841	1.75532	0.0283094	0.375523	0.674186
ENSMUSG00000102175		2.18051	-0.103223	0.436049	0.279833	0.660188
ENSMUSG00000103922	RP23-34E15.4	169.896	-0.139437	0.151749	0.107085	0.401454	15.9766	0.19498	0.368429	0.410728	0.785663	15.9766	0.358043	0.420982	0.113972	0.458187
ENSMUSG00000033845	Mrpl15	2702.43	-0.0095502	0.100982	0.880551	0.972883	1924.71	0.178751	0.246728	0.390436	0.771253	1924.71	0.273009	0.250629	0.159543	0.536067
ENSMUSG00000102275	RP23-34E15.5	33.6853	-0.0661953	0.191951	0.433857	0.793622	1.06774	0.0474154	0.455384	0.507457		1.06774	-0.0336004	0.381964	0.548499
ENSMUSG00000025903	Lypla1	1402.75	0.0737907	0.121678	0.30996	0.691103	3164.11	0.51684	0.299112	0.0328933	0.226804	3164.11	0.535591	0.307426	0.0226839	0.18951
ENSMUSG00000033813	Tcea1	3914.35	-0.0251616	0.102617	0.695379	0.9193	1124.79	0.172502	0.271366	0.434546	0.79758	1124.79	0.114793	0.252076	0.548847	0.867438
ENSMUSG00000062588	Gm6104	3.43774	-0.0599045	0.338612	0.526225	0.848955	1.94595	-0.121606	0.454584	0.384871	0.768257	1.94595	-0.0973941	0.384256	0.347811
ENSMUSG00000103280	RP24-426M1.4	5.71447	0.590508	0.781107	0.0119876	0.0936932	2.63978	0.217836	0.512998	0.084597	0.390627	2.63978	0.0695171	0.379885	0.363678
ENSMUSG00000002459	Rgs20	3.05894	-0.0747245	0.353081	0.44102	0.798319	0.697897	0.0355669	0.452433	0.667172		0.697897	-0.0370423	0.382272	0.52536
ENSMUSG00000033793	Atp6v1h	2337.16	0.0794722	0.126427	0.286232	0.666861	1292.63	-0.153938	0.247604	0.460525	0.80936	1292.63	0.034753	0.22837	0.852091	0.968011
ENSMUSG00000025905		11.528	1.41121	0.779199	0.000525574	0.00811653
ENSMUSG00000025907	Rb1cc1	1853.08	-0.0489526	0.0903545	0.399585	0.765699	441.782	1.68113	0.275545	9.90061e-11	1.56273e-08	441.782	1.35061	0.278555	1.10287e-07	1.00964e-05
ENSMUSG00000090031	4732440D04Rik	74.8569	-0.00587913	0.131755	0.935641	0.986104	13.6781	1.01374	0.719928	0.0121943	0.119613	13.6781	0.180697	0.370413	0.305614	0.708124
ENSMUSG00000087247		1.33634	0.235326	0.624875	0.0384337
ENSMUSG00000102135	RP23-5K7.4	4.75408	0.0107629	0.280315	0.903785	0.978574	1.94292	0.0560524	0.448668	0.572679	0.869737	1.94292	0.0270111	0.375012	0.696802
ENSMUSG00000051285	Pcmtd1	4225.27	-0.0601427	0.106708	0.365043	0.738985	139.716	-0.579169	0.361549	0.0312515	0.219481	139.716	-0.366976	0.331625	0.099354	0.428437
ENSMUSG00000098201		11.6467	0.0320298	0.261897	0.718675	0.928127
ENSMUSG00000103509	WI1-817D1.2	458.959	-0.223472	0.14186	0.0166319	0.119721	11.5417	-0.345804	0.549203	0.113579	0.458503	11.5417	-0.182405	0.401174	0.220059	0.616814
ENSMUSG00000048538	Gm9826	2.24203	0.0297189	0.34793	0.739164	0.934476	4.40219	-0.0309518	0.425474	0.837856	0.960118	4.40219	0.0592705	0.366511	0.603617	0.893547
ENSMUSG00000097797	Gm26901	32.0447	0.0743251	0.209984	0.39636	0.763053	11.3589	-0.358465	0.476987	0.155472	0.531264	11.3589	-0.503782	0.625999	0.0445133	0.28035
ENSMUSG00000103067	RP24-181G14.2	21.141	0.285593	0.374305	0.0468469	0.240646	1.76289	-0.0136329	0.445627	0.884524	0.973546	1.76289	-0.0277226	0.376915	0.648196
ENSMUSG00000104226		2.16379	-0.0212368	0.332576	0.812565	0.953358
ENSMUSG00000103903		1.37326	-0.0379525	0.371292	0.66465
ENSMUSG00000025909	Sntg1	42.0632	-0.330424	0.303592	0.0194063	0.133603	2.4024	-0.0355476	0.439289	0.76665	0.939121	2.4024	-0.0986977	0.391192	0.214818
ENSMUSG00000084353	Gm15452	4.14449	0.0129667	0.2936	0.884936	0.973994	5.23184	0.044539	0.41092	0.809621	0.952176	5.23184	-0.0396054	0.355828	0.764202	0.947719
ENSMUSG00000103933	RP23-397E23.1	1.85479	0.0405658	0.342612	0.656222		0.799471	0.107393	0.471157	0.212855		0.799471	0.0688561	0.387657	0.313009
ENSMUSG00000076135	Gm24276	1.26264	0.0231984	0.369938	0.786284		2.03475	-0.00842231	0.43847	0.942745	0.985987	2.03475	-0.0241726	0.372164	0.766197
ENSMUSG00000061024	Rrs1	1177.54	-0.0324675	0.101351	0.610461	0.885841	226.538	-0.634405	0.403205	0.0266595	0.198802	226.538	-0.216159	0.309129	0.287833	0.690567
ENSMUSG00000025911	Adhfe1	160.973	0.0638893	0.128987	0.389915	0.759349	12.8303	-0.704776	0.609371	0.0345282	0.233314	12.8303	-0.134933	0.334606	0.464482	0.8223
ENSMUSG00000079671	2610203C22Rik	9.59124	0.0136329	0.222983	0.871609	0.971054	0.907455	0.0963022	0.463562	0.334173		0.907455	0.0514868	0.381388	0.480631
ENSMUSG00000081441		1.17592	-0.0179335	0.391202	0.822938
ENSMUSG00000025912	Mybl1	1153.37	-0.0227099	0.0921866	0.702543	0.922025	49.1942	-0.337122	0.3943	0.187683	0.579335	49.1942	-0.15448	0.319831	0.426709	0.801992
ENSMUSG00000045210	Vcpip1	2306.15	0.0405411	0.156726	0.603218	0.883192	120.167	-0.037546	0.248915	0.855394	0.964135	120.167	-0.193986	0.250952	0.313249	0.715844
ENSMUSG00000097893	1700034P13Rik	12.6888	0.0407426	0.247839	0.644654	0.901169	4.37202	0.140989	0.446255	0.413737	0.787603	4.37202	0.0442996	0.362384	0.71667	0.93649
ENSMUSG00000025915	Sgk3	1011.42	-0.220645	0.161302	0.0244197	0.156018	356.165	3.43737	0.53077	6.46857e-12	1.25022e-09	356.165	2.82509	0.536324	8.53019e-09	1.07448e-06
ENSMUSG00000046101	Mcmdc2	170.479	-0.0241253	0.119729	0.731181	0.93168	14.4321	0.498213	0.552319	0.0855177	0.393344	14.4321	-0.0331242	0.330432	0.842264	0.966006
ENSMUSG00000098234	Snhg6	1099.7	-0.13102	0.151533	0.125708	0.440089	411.48	0.160864	0.320098	0.494277	0.829115	411.48	0.0881135	0.287188	0.651259	0.913285
ENSMUSG00000093178	Snord87	12.6635	-0.00266863	0.208224	0.974209	0.994238	7.60299	-0.0047721	0.396003	0.979254	0.99432	7.60299	0.0284984	0.34425	0.848965	0.967268
ENSMUSG00000099032	Tcf24	173.576	0.0225903	0.103819	0.727157	0.930158	3.33209	0.0541301	0.438802	0.687716	0.914611	3.33209	0.133716	0.401782	0.190152	0.580363
ENSMUSG00000025916	Ppp1r42	3.54796	0.126945	0.428754	0.232272	0.609051	1.11248	0.0904909	0.458574	0.382662		1.11248	0.0372497	0.377693	0.59879
ENSMUSG00000025917	Cops5	1677.27	-0.14186	0.110645	0.0554736	0.268461	1544.21	-0.043964	0.247077	0.830995	0.959339	1544.21	0.0723032	0.234218	0.700678	0.932068
ENSMUSG00000056763	Cspp1	1375.43	-0.104062	0.106385	0.128382	0.445112	292.213	-0.243603	0.24349	0.23864	0.640874	292.213	-0.609878	0.276255	0.00583897	0.0790147
ENSMUSG00000102356	RP23-228G18.5	8.65536	0.00555448	0.229698	0.947842	0.988288	0.753911	-0.0421855	0.454657	0.548093		0.753911	-0.0473541	0.38428	0.259036
ENSMUSG00000067851	Arfgef1	3267.93	0.0269444	0.142222	0.719996	0.928944	162.928	-0.294738	0.365154	0.234645	0.636005	162.928	-0.420046	0.413676	0.0780772	0.379909
ENSMUSG00000088153	Gm26348	5.52186	-0.00729353	0.264241	0.933949	0.985923	0.836086	0.0239515	0.45096	0.754139		0.836086	-0.033927	0.381263	0.564965
ENSMUSG00000102556	RP24-327F2.1	14.9315	0.0730189	0.283222	0.441782	0.79879	4.4277	0.0252091	0.424873	0.875195	0.970692	4.4277	-0.138242	0.40029	0.215338	0.609529
ENSMUSG00000048960	Prex2	1575.52	0.0575313	0.084343	0.290686	0.6719	79.0294	0.243606	0.334309	0.313113	0.713903	79.0294	-0.0268663	0.283052	0.886953	0.974625
ENSMUSG00000077318		1.51948	0.0371853	0.407051	0.637014
ENSMUSG00000103494		1.48758	0.00668369	0.379147	0.935317
ENSMUSG00000057715	A830018L16Rik	164.411	-0.234459	0.175898	0.0228433	0.149059	37.5234	-0.836133	0.629939	0.0182156	0.156401	37.5234	-1.59609	0.647076	0.000585377	0.0143165
ENSMUSG00000103825	RP23-2K13.1	11.3217	-0.0474957	0.229502	0.585271	0.878034	4.35167	-0.694913	1.31872	0.0153299	0.139196	4.35167	-0.408699	0.732164	0.0134144	0.136338
ENSMUSG00000016918	Sulf1	232.556	-0.829635	0.17338	1.06617e-07	4.7236e-06	158.914	-0.771529	0.519302	0.0188428	0.159402	158.914	-1.46167	0.538655	0.000333211	0.00936625
ENSMUSG00000025938	Slco5a1	215.559	0.613572	0.21733	8.84097e-05	0.00180857	48.9729	-0.887445	0.454844	0.00640818	0.0765787	48.9729	-0.969676	0.473912	0.00313366	0.0512678
ENSMUSG00000104518		1.46476	-0.0478532	0.384366	0.583623
ENSMUSG00000069620	Gm5250	2.32546	0.0151999	0.323514	0.865275	0.969196	3.04306	0.020597	0.444666	0.842083	0.960432	3.04306	-0.0530454	0.381625	0.267616	0.673482
ENSMUSG00000099498	Gm29283	21.1472	-0.0658853	0.208744	0.446386	0.801228	5.71293	-0.044897	0.408549	0.808717	0.951911	5.71293	-0.147378	0.389312	0.289246	0.69215
ENSMUSG00000042414	Prdm14	2108.52	0.877625	0.10419	7.40845e-18	1.59465e-15	281.073	-0.198195	0.238716	0.328464	0.725446	281.073	0.0270866	0.21848	0.880126	0.973217
ENSMUSG00000005886	Ncoa2	1763.53	0.0508	0.128004	0.488617	0.82805	281.692	0.298091	0.318307	0.216495	0.615619	281.692	0.0433083	0.267312	0.821617	0.961152
ENSMUSG00000103506	RP23-93D12.2	20.7382	0.12272	0.24053	0.210382	0.581966	6.63353	0.320326	0.553467	0.112848	0.456312	6.63353	0.213759	0.436202	0.124617	0.475352
ENSMUSG00000103495		6.82614	-0.058	0.282746	0.532509	0.852344
ENSMUSG00000102639		2.76368	-0.00734753	0.323703	0.934403	0.986002
ENSMUSG00000104170		4.74625	0.35442	0.651175	0.035493	0.199284
ENSMUSG00000103085	RP23-125I14.2	21.0692	0.0106027	0.223559	0.899961	0.977922	10.6495	-0.297271	0.509614	0.164744	0.545433	10.6495	-0.295581	0.502126	0.0661247	0.346617
ENSMUSG00000102664	RP23-125I14.1	8.21787	0.0284675	0.304133	0.753651	0.938578	7.99212	-0.613787	0.671144	0.050051	0.29262	7.99212	-1.77441	0.85464	0.00160933	0.0310253
ENSMUSG00000025935	Tram1	3975.93	0.00594572	0.109134	0.928952	0.984906	621.18	0.210909	0.240437	0.304983	0.706714	621.18	0.109079	0.22434	0.551054	0.868631
ENSMUSG00000025937	Lactb2	4731.87	0.0350868	0.0850532	0.526238	0.848955	1257	0.0475487	0.275097	0.823841	0.956971	1257	0.0902286	0.259339	0.636217	0.907574
ENSMUSG00000102982	RP23-70F22.2	93.0923	0.0526839	0.193325	0.527587	0.849676	5.50857	0.0848677	0.422803	0.633704	0.895298	5.50857	-0.098332	0.375117	0.423113	0.79988
ENSMUSG00000067813	Xkr9	5.04678	0.159492	0.430458	0.173413	0.527042	2.45984	0.176764	0.49421	0.0637285	0.337456	2.45984	0.0831428	0.386232	0.19926
ENSMUSG00000025932	Eya1	524.651	-0.934753	0.121153	2.24646e-15	3.54809e-13	34.1402	-0.28232	0.468508	0.213884	0.612987	34.1402	-0.260291	0.437804	0.143325	0.508072
ENSMUSG00000095853		2.19353	-0.261652	0.608833	0.0529261	0.260855
ENSMUSG00000102588		3.52051	-0.0273682	0.29441	0.762121	0.941206
ENSMUSG00000054493	Gm9947	10.7196	-2.41442	0.803876	9.88718e-06	0.000275787	0.963637	-0.0339117	0.450546	0.688377		0.963637	-0.0373735	0.380103	0.518217
ENSMUSG00000025930	Msc	100.633	-1.75335	0.325727	4.17833e-09	2.55351e-07	30.4471	-1.13106	0.746121	0.0079658	0.0889424	30.4471	-1.01392	0.812653	0.00915347	0.105583
ENSMUSG00000103492		2.40639	-0.220279	0.571567	0.0717062	0.314708
ENSMUSG00000082193	Rpl5-ps1	6.29301	-0.00409523	0.253261	0.962507	0.991434	9.3673	0.100563	0.429932	0.556105	0.860343	9.3673	-0.0218495	0.359185	0.852363	0.968011
ENSMUSG00000032769	Trpa1	500.74	0.268914	0.139505	0.00559995	0.0539534	17.7338	-0.171137	0.435493	0.380656	0.766024	17.7338	-1.33398	1.40965	0.00665293	0.0867366
ENSMUSG00000073737	Gm10566	2.18737	-0.0849474	0.395779	0.376276	0.747787	3.86381	-0.0421682	0.436689	0.740622	0.931856	3.86381	-0.0333882	0.369397	0.723715	0.937651
ENSMUSG00000025925	Terf1	1401.41	-0.106225	0.175987	0.222991	0.597337	515.03	-0.198874	0.246121	0.335253	0.73151	515.03	-0.0451246	0.225196	0.802007	0.954881
ENSMUSG00000104379	RP23-325F17.4	38.8171	0.0393598	0.186354	0.629144	0.894004	1.82002	0.0315332	0.446023	0.752353	0.935634	1.82002	-0.0424895	0.379457	0.420084
ENSMUSG00000032719		13.6024	-0.00664135	0.209073	0.935974	0.986104
ENSMUSG00000043716	Rpl7	46281.6	-0.0506865	0.128828	0.490787	0.828849	12019.5	0.175138	0.283939	0.438768	0.799841	12019.5	0.154455	0.267842	0.451768	0.815385
ENSMUSG00000025921	Rdh10	130.479	-0.0113157	0.124615	0.873883	0.971477	41.6867	-0.130648	0.371854	0.561105	0.86326	41.6867	-0.160568	0.348473	0.382639	0.770482
ENSMUSG00000025920	Stau2	168.006	0.0129101	0.124505	0.856281	0.96665	40.5453	-0.142059	0.363689	0.535571	0.849888	40.5453	0.0158991	0.310039	0.932373	0.9841
ENSMUSG00000025939	Ube2w	688.456	-0.0359409	0.104116	0.579968	0.874998	429.747	0.354143	0.327098	0.146607	0.516596	429.747	0.3324	0.32256	0.133453	0.493165
ENSMUSG00000102457	RP23-382H8.2	16.4708	0.310812	0.419581	0.0433467	0.22863	3.79298	3.39978	1.67907	0.00150869	0.0264593	3.79298	0.244745	0.485533	0.0361536	0.247723
ENSMUSG00000079658	Tceb1	1957.72	0.137767	0.157697	0.115939	0.420015	1725.98	0.310382	0.301203	0.187617	0.579335	1725.98	0.0756563	0.257495	0.669191	0.921717
ENSMUSG00000097744		1.46408	0.00050192	0.369439	0.995246
ENSMUSG00000025940	Tmem70	439.967	-0.0119473	0.105561	0.855028	0.966351	424.656	0.433887	0.344087	0.0912374	0.408928	424.656	0.362396	0.333491	0.109057	0.447474
ENSMUSG00000025779	Ly96	22.1627	0.662704	0.552334	0.00599003	0.0566688	44.201	0.306994	0.419178	0.222281	0.62116	44.201	0.0559914	0.318568	0.755153	0.945082
ENSMUSG00000091020	Gm5828	5.13822	-0.000585354	0.269933	0.994712	0.998077	0.533872	0.0133437	0.451563	0.879427		0.533872	0.0105209	0.378136	0.861622
ENSMUSG00000042686	Jph1	77.5468	0.459983	0.281522	0.00332361	0.0361157	0.72336	0.102887	0.469862	0.228685		0.72336	0.0623339	0.386053	0.370431
ENSMUSG00000025777	Gdap1	4.46555	-0.0962127	0.328407	0.34254	0.720166	0.723301	0.0608405	0.460785	0.314497		0.723301	0.0300755	0.381286	0.653772
ENSMUSG00000100398		16.6964	0.769157	0.583413	0.00383956	0.0402022
ENSMUSG00000101589		6.66058	0.102469	0.315888	0.314747	0.694825
ENSMUSG00000102048	Gm6075	2.07975	-0.13481	0.44177	0.210102	0.581868	1.82812	-0.0652688	0.462398	0.11954	0.469752	1.82812	-0.045335	0.384431	0.116059
ENSMUSG00000067780		4.75383	0.105634	0.346545	0.308971	0.690029
ENSMUSG00000085125		2.06909	-0.0060665	0.368136	0.942823	0.987389
ENSMUSG00000025776	Crispld1	30.5041	0.77477	0.456641	0.00171121	0.0213445	1.27941	0.0107676	0.447533	0.906364		1.27941	-0.0510398	0.383198	0.37055
ENSMUSG00000099433		1.24056	-0.0224719	0.399491	0.774013
ENSMUSG00000089787		2.56282	0.0767531	0.366349	0.427531	0.788867
ENSMUSG00000100720	AC098736.2	1.31947	-0.0430152	0.382546	0.619214		4.19827	-0.224229	0.487328	0.199653	0.59525	4.19827	-0.107357	0.376723	0.38805	0.774411
ENSMUSG00000100204	Gm4849	2.10342	0.0907069	0.41767	0.336267	0.715848	1.03234	0.0409919	0.449223	0.68128		1.03234	0.0284888	0.376998	0.67243
ENSMUSG00000043760	Pkhd1	20.2921	0.037892	0.194891	0.645551	0.901436	20.5965	-1.57354	0.762855	0.00166867	0.0287069	20.5965	-0.430482	0.557414	0.0612373	0.332554
ENSMUSG00000090142		1.71784	-0.0162873	0.371316	0.847332
ENSMUSG00000041872	Il17f	39.7557	0.689503	0.384697	0.0015125	0.0193014	9.41541	1.63224	0.88395	0.00386686	0.0528735	9.41541	0.194879	0.397794	0.249555	0.652178
ENSMUSG00000041859	Mcm3	9768.61	-0.193687	0.112419	0.0164163	0.11886	2120.81	-0.231166	0.246133	0.263876	0.668888	2120.81	0.0788091	0.224585	0.664526	0.919232
ENSMUSG00000097934	6720483E21Rik	2.9274	0.00554915	0.327774	0.95031	0.989077	0.700623	0.0193576	0.449776	0.820296		0.700623	-0.0225856	0.378455	0.75037
ENSMUSG00000025931	Paqr8	156.373	-0.0856472	0.124589	0.249294	0.628675	29.7927	-0.852986	0.629147	0.0178568	0.15437	29.7927	-0.391559	0.479178	0.0818955	0.388008
ENSMUSG00000041809	Efhc1	100.525	0.297597	0.225071	0.014285	0.107504	15.016	0.380782	0.46819	0.149501	0.520595	15.016	0.0541999	0.324426	0.760713	0.946129
ENSMUSG00000041779	Tram2	434.053	0.077234	0.266179	0.4116	0.776123	78.6778	-0.550396	0.50055	0.0608752	0.328595	78.6778	-0.891263	0.615967	0.0096452	0.10918
ENSMUSG00000100819	Gm2693	3.50858	0.0254985	0.293722	0.777563	0.944517	1.73019	-0.120661	0.469161	0.245505	0.648426	1.73019	-0.0371196	0.375494	0.617579
ENSMUSG00000025933	Tmem14a	128.422	-0.0350002	0.154823	0.651144	0.903003	76.7324	-0.192945	0.330308	0.413823	0.787603	76.7324	0.132246	0.295659	0.500327	0.841476
ENSMUSG00000102633	RP23-278E1.4	2.7764	-0.0490306	0.336511	0.597033	0.881114	8.46101	-0.206783	0.479224	0.230841	0.63136	8.46101	0.142809	0.389255	0.287332	0.690132
ENSMUSG00000025934	Gsta3	377.699	0.0705995	0.134989	0.354503	0.730543	62.4146	-1.14481	0.452507	0.00107119	0.0200974	62.4146	-0.405138	0.382398	0.0829111	0.390171
ENSMUSG00000099343	Gm28836	15.1605	-0.0281721	0.194516	0.730349	0.931237	0.872634	-0.00472576	0.446209	0.95663		0.872634	-0.0382268	0.379046	0.584993
ENSMUSG00000028033	Kcnq5	7.61699	-0.103646	0.309242	0.308191	0.689485	1.19023	-0.0878157	0.464416	0.359925		1.19023	0.0547238	0.381184	0.407401
ENSMUSG00000082935	Gm7658	48.4942	0.0687855	0.163002	0.396714	0.763452	49.472	-0.0472387	0.334347	0.83247	0.959449	49.472	-0.101454	0.310127	0.589299	0.887273
ENSMUSG00000041670	Rims1	149.068	-0.354424	0.189222	0.0030273	0.0335153	49.1464	-0.851822	0.475052	0.00949044	0.0995891	49.1464	-0.361795	0.384716	0.109469	0.448393
ENSMUSG00000102766	RP23-28L24.5	1.31118	0.0963324	0.441613	0.289483		0.644295	-0.00654573	0.450461	0.919142		0.644295	-0.0402123	0.382998	0.391862
ENSMUSG00000065405		3.83006	0.0510671	0.328911	0.584048	0.877498
ENSMUSG00000097970	Gm27028	27.4398	0.113054	0.232598	0.236754	0.614048	1.15182	0.0114321	0.443897	0.915288		1.15182	-0.0791837	0.389191	0.236138
ENSMUSG00000026158	Ogfrl1	371.76	0.183434	0.130513	0.0322487	0.187513	28.3958	0.236751	0.426998	0.309503	0.710408	28.3958	0.08176	0.338916	0.630892	0.905515
ENSMUSG00000026156	B3gat2	59.8338	-0.0169393	0.145863	0.822232	0.956377	8.27001	-0.136371	0.440867	0.428573	0.793345	8.27001	0.0140853	0.354981	0.914823	0.981215
ENSMUSG00000026155	Smap1	653.953	-0.00813462	0.0959121	0.894492	0.97673	95.4247	0.818041	0.324751	0.00238839	0.0372026	95.4247	0.675889	0.32854	0.00725253	0.0919032
ENSMUSG00000026154	1110058L19Rik	341.589	-0.00165554	0.133589	0.981942	0.996367	170.534	-0.00946527	0.288545	0.964216	0.991218	170.534	0.0942566	0.271476	0.627706	0.903804
ENSMUSG00000026153	Fam135a	1162.69	0.108487	0.110617	0.124761	0.438339	150.475	-0.255159	0.390561	0.291085	0.694826	150.475	-0.311526	0.408194	0.143152	0.507992
ENSMUSG00000102398		3.891	0.0711298	0.31655	0.46075	0.810078
ENSMUSG00000026147	Col9a1	1.78598	0.112341	0.461522	0.22756		0.464805	-0.0146093	0.45267	0.907929		0.464805	0.00612005	0.378225	0.868108
ENSMUSG00000067736	Gm10222	3.9365	-0.0314682	0.292385	0.728527	0.930297	37.7021	-0.0190404	0.429283	0.891173	0.97431	37.7021	0.0289078	0.365438	0.79178	0.95402
ENSMUSG00000101939	Gm28438	85.1364	-0.0554126	0.177771	0.4982	0.83375	8.96402	-0.00113764	0.419789	0.992952	0.998064	8.96402	0.0869137	0.3702	0.483958	0.833727
ENSMUSG00000101111	Gm28437	52.599	0.0349923	0.164428	0.656302	0.905202	109.627	-0.0146201	0.420012	0.923433	0.981917	109.627	0.012408	0.358823	0.923317	0.982677
ENSMUSG00000100862	Gm10925	3.78288	-0.105427	0.360434	0.310256	0.691186	239.159	-0.0204785	0.422409	0.891319	0.97431	239.159	0.0182824	0.360333	0.883203	0.973436
ENSMUSG00000102070	Gm28661	15.9609	-0.231709	0.364369	0.0787272	0.333429	106.751	-0.346113	0.509409	0.145792	0.515375	106.751	-0.111207	0.354032	0.48633	0.834526
ENSMUSG00000101249	Gm29216	24.8862	-0.113882	0.246552	0.241994	0.620865	39.2706	-0.204965	0.456469	0.293777	0.696248	39.2706	-0.110622	0.3688	0.431756	0.805402
ENSMUSG00000073725	Lmbrd1	549.648	0.182967	0.140628	0.0388087	0.211741	174.148	0.527208	0.31826	0.0348217	0.234218	174.148	0.158265	0.262446	0.420962	0.798158
ENSMUSG00000033569	Bai3	11.9605	0.124595	0.305935	0.236407	0.613814	5.38475	0.0995753	0.428055	0.571737	0.869526	5.38475	0.481684	0.836389	0.0239196	0.19516
ENSMUSG00000103924		1.28037	-0.00164255	0.381762	0.983943
ENSMUSG00000073722		1.89099	-0.0762783	0.365525	0.430113
ENSMUSG00000086240	Gm7846	30.6118	-0.0167455	0.182756	0.833992	0.959766	64.4409	-0.0829873	0.343538	0.715686	0.924167	64.4409	-0.0299181	0.304834	0.869099	0.971984
ENSMUSG00000099492	Gm5525	10.1829	-0.28655	0.427984	0.0551277	0.267639	27.3015	0.620133	0.503986	0.0448697	0.272752	27.3015	0.196343	0.343955	0.321039	0.722417
ENSMUSG00000048874	Phf3	6766.62	-0.209703	0.106781	0.00902103	0.0766394	368.055	-0.477209	0.275915	0.03509	0.234859	368.055	-0.276107	0.25436	0.16013	0.537284
ENSMUSG00000103783	RP24-172B22.6	65.4026	-0.0495394	0.166421	0.535287	0.853757	6.28484	-0.0235312	0.41235	0.89161	0.97431	6.28484	-0.149571	0.395523	0.248522	0.651508
ENSMUSG00000104315	RP23-471J16.2	82.6143	-0.152139	0.242062	0.138872	0.465903	20.058	-0.278567	0.449621	0.234438	0.635718	20.058	-0.722074	0.897779	0.0192214	0.171194
ENSMUSG00000026064	Ptp4a1	103.439	-0.171837	0.181922	0.0748313	0.322831	3.3978	0.0646937	0.430011	0.678562	0.912645	3.3978	-0.165458	0.41825	0.125926	0.478267
ENSMUSG00000117310		5.48014	0.0159824	0.257549	0.855442	0.966517	8.03153	0.00602594	0.38412	0.977616	0.993886	8.03153	0.14811	0.362719	0.384838	0.772396
ENSMUSG00000117091		35.1747	2.16229	0.433478	2.03441e-08	1.09475e-06	22.4907	0.275849	0.491069	0.203182	0.599678	22.4907	0.10356	0.364229	0.482574	0.833461
ENSMUSG00000086727	4931428L18Rik	21.0522	2.20642	0.535659	7.72483e-07	2.79184e-05	13.2645	0.181134	0.461363	0.314158	0.71477	13.2645	0.012458	0.358392	0.921049	0.982128
ENSMUSG00000099796		1.91485	-0.0433328	0.392928	0.607523
ENSMUSG00000094215	Gm6489	25.6716	2.45064	0.488047	1.04925e-08	6.01906e-07	8.78422	0.199362	0.473414	0.260387	0.665765	8.78422	0.0458517	0.362437	0.707494	0.934355
ENSMUSG00000070960	Gm10307	5.51849	0.0342227	0.291337	0.706421	0.92348	1.89152	0.048144	0.442289	0.691974	0.916315	1.89152	-0.0218486	0.372494	0.788993
ENSMUSG00000026058		12.5642	0.9349	0.686875	0.00258704	0.0295652
ENSMUSG00000100481		1.08962	0.0779265	0.431789	0.361442
ENSMUSG00000101754		2.27994	-0.0383005	0.446562	0.520429	0.845238
ENSMUSG00000100318		1.12885	0.0819603	0.433351	0.344573
ENSMUSG00000026134	Prim2	1866.37	-0.0278968	0.105653	0.670232	0.911446	488.957	-0.0299853	0.255804	0.883606	0.973376	488.957	0.226117	0.260323	0.251798	0.654822
ENSMUSG00000101682	Gm29228	3.16518	0.0115017	0.329976	0.897309	0.97757	2.82062	0.0713892	0.453489	0.461532	0.810067	2.82062	0.00570336	0.374726	0.9285
ENSMUSG00000102714	RP24-423J19.3	41.8268	0.0661035	0.214507	0.448493	0.802506	6.1826	-0.263147	0.512025	0.152339	0.525453	6.1826	-0.338734	0.591253	0.0314919	0.229484
ENSMUSG00000102093	Gm17813	2.68989	0.0497163	0.326304	0.593398	0.88028	2.6335	0.101626	0.457684	0.355787	0.747029	2.6335	0.0255621	0.373686	0.731237
ENSMUSG00000103746		5.63313	0.0390603	0.267142	0.663787	0.908366
ENSMUSG00000004768	Rab23	647.474	-0.0357394	0.146976	0.639591	0.898976	186.955	-0.0698025	0.260498	0.742843	0.932295	186.955	0.268266	0.271032	0.186994	0.575866
ENSMUSG00000042215	Bag2	173.601	0.120802	0.141615	0.141455	0.471833	64.8401	0.73007	0.321007	0.00536226	0.0670406	64.8401	0.555455	0.318309	0.0200484	0.176217
ENSMUSG00000042197	Zfp451	2100.56	-0.0131605	0.0899931	0.821885	0.956377	336.346	0.196842	0.17641	0.226133	0.625688	336.346	0.141234	0.171381	0.35729	0.749992
ENSMUSG00000081402	Gm15455	25.0507	0.509366	0.42832	0.00860527	0.0739859	27.0038	3.3125	0.863034	4.68655e-06	0.000207402	27.0038	3.10977	0.874289	1.3061e-05	0.000646292
ENSMUSG00000042182	Bend6	38.0315	0.00297712	0.164909	0.969392	0.992992	5.13416	0.0550737	0.417486	0.757631	0.936581	5.13416	0.027386	0.357708	0.826431	0.963468
ENSMUSG00000104416		2.16448	0.100101	0.426596	0.298286	0.678818
ENSMUSG00000026131	Dst	22136.2	-0.04207	0.124568	0.559438	0.865819	1472.45	0.395956	0.352597	0.123315	0.476094	1472.45	0.175158	0.294831	0.380928	0.769821
ENSMUSG00000103596	RP23-87D8.2	4.67781	0.0447509	0.300206	0.627509	0.893223	5.67488	-0.147144	0.456068	0.338068	0.733152	5.67488	-0.268551	0.516951	0.0157837	0.151769
ENSMUSG00000103364	RP23-87D8.4	33.6681	-0.0829867	0.20956	0.349161	0.725619	42.1147	0.213723	0.507743			42.1147	0.0576939	0.37334
ENSMUSG00000105982		4.59843	-0.0357325	0.276337	0.69205	0.918867
ENSMUSG00000096992	Gm26788	250.502	0.0733565	0.142815	0.348087	0.724781	21.1193	0.309289	0.377757	0.218582	0.617658	21.1193	-0.0579428	0.302933	0.751961	0.944029
ENSMUSG00000103001	RP24-422C24.3	33.3343	0.0574033	0.172377	0.480314	0.823751	3.99458	-0.0102973	0.423037	0.946122	0.986662	3.99458	0.039845	0.362369	0.736143	0.940183
ENSMUSG00000102336	mmu-mir-5103	28.7888	-0.0618033	0.188538	0.460377	0.810078	2.89987	-0.0671561	0.448233	0.53437	0.848953	2.89987	-0.0742657	0.383888	0.304025
ENSMUSG00000042111	Ccdc115	689.445	-0.153505	0.147396	0.0778217	0.331098	367.92	-0.211903	0.236541	0.294879	0.696286	367.92	-0.0363259	0.216662	0.83428	0.965175
ENSMUSG00000101711	Gm28306	1.75063	0.0361448	0.353235	0.686655		0.65293	0.0380477	0.454099	0.497217		0.65293	0.00853956	0.378276	0.749538
ENSMUSG00000026127	Imp4	1722.41	0.0411202	0.0994371	0.513102	0.841643	947.612	-0.240176	0.232417	0.230276	0.631299	947.612	-0.0472169	0.212288	0.798536	0.954157
ENSMUSG00000026126	Ptpn18	49.2436	0.201937	0.245917	0.0694944	0.308676	5.44599	0.260611	0.522055	0.141221	0.508979	5.44599	0.167392	0.412556	0.170764	0.551884
ENSMUSG00000100280	Gm28417	5.32352	0.0518971	0.27844	0.572355	0.872335	20.4927	0.113855	0.4285	0.527613	0.845786	20.4927	0.0308118	0.356115	0.812805	0.958386
ENSMUSG00000026125	Prss39	1.67969	0.0436432	0.401697	0.59522		1.26511	-0.0637631	0.46172	0.20461		1.26511	-0.02237	0.379207	0.608766
ENSMUSG00000026124		1.84138	0.0770624	0.405227	0.401383
ENSMUSG00000037529		1.7809	0.0243778	0.371741	0.775246
ENSMUSG00000037509	Arhgef4	286.645	0.592123	0.171511	9.24075e-06	0.000260443	11.1771	-0.0412342	0.407425	0.820749	0.955666	11.1771	-0.061477	0.355855	0.65721	0.916298
ENSMUSG00000104002		59.1987	-0.193877	0.234615	0.0733631	0.318816
ENSMUSG00000037503	Fam168b	3365.23	-0.0526565	0.0910554	0.367841	0.740034	211.107	-0.14036	0.251957	0.502004	0.832527	211.107	-0.460085	0.289111	0.0356052	0.246296
ENSMUSG00000104358	RP23-348C6.1	87.8624	-0.0930879	0.202853	0.296236	0.677105	4.32617	-0.168074	0.453124	0.346274	0.740843	4.32617	-0.156689	0.400319	0.226005	0.624849
ENSMUSG00000026123	Plekhb2	882.326	-0.104553	0.10233	0.116433	0.421012	238.693	-0.248163	0.292296	0.276728	0.681069	238.693	-0.0525648	0.254929	0.775211	0.950586
ENSMUSG00000102531		3.55848	-0.0133368	0.2894	0.881528	0.972926
ENSMUSG00000102279	RP24-424K5.3	1.11233	-0.0235198	0.399982	0.763805		0.573389	-0.0522422	0.456898	0.523336		0.573389	-0.0139451	0.37766	0.821168
ENSMUSG00000103708	RP24-424K5.4	9.39516	0.109095	0.318651	0.291047	0.6719	20.9502	-0.535359	0.625393	0.0649197	0.340747	20.9502	-0.0790792	0.338655	0.632669	0.90594
ENSMUSG00000102434	RP24-424K5.2	7.62181	-0.0738902	0.28584	0.437884	0.796265	0.656093	0.0804691	0.464689	0.245212		0.656093	0.027634	0.380583	0.773155
ENSMUSG00000045216	Hs6st1	1257.88	-0.813081	0.169393	9.33166e-08	4.18e-06	160.364	-0.378239	0.469812	0.144403	0.512927	160.364	-1.40171	0.688902	0.00167091	0.0319552
ENSMUSG00000102202	RP23-173H19.3	20.037	0.115046	0.235599	0.2318	0.608477	3.24392	-0.0790397	0.454707	0.42973	0.794376	3.24392	-0.0203085	0.373745	0.779217	0.951364
ENSMUSG00000037470	Uggt1	6319.36	-0.0414854	0.0785224	0.417019	0.780663	781.228	0.533698	0.353232	0.0443461	0.27113	781.228	0.344013	0.323973	0.121522	0.470189
ENSMUSG00000098752		1.91173	-0.000312909	0.393304	0.996818
ENSMUSG00000047180		3.11212	0.0957631	0.368064	0.344909	0.7224
ENSMUSG00000037447	Arid5a	172.224	-0.0481814	0.113971	0.484908	0.826678	42.5961	0.227761	0.374621	0.348461	0.742513	42.5961	0.0192438	0.307657	0.915802	0.981352
ENSMUSG00000102762		2.33889	-0.0993889	0.407785	0.316099	0.695923
ENSMUSG00000010453	Kansl3	1372.35	-0.0549135	0.0959173	0.368959	0.740634	302.009	0.474057	0.398246	0.083923	0.389154	302.009	0.0199105	0.286765	0.908137	0.980158
ENSMUSG00000037432	Fer1l5	104.061	0.0408224	0.168141	0.607445	0.88531	5.21937	-0.0909734	0.427178	0.59691	0.87944	5.21937	-0.0388571	0.358605	0.758398	0.945808
ENSMUSG00000001143	Lman2l	255.236	0.00948667	0.162502	0.902428	0.978181	123.403	-0.0218147	0.271018	0.915948	0.98111	123.403	0.0051639	0.252337	0.979992	0.995511
ENSMUSG00000037408	Cnnm4	278.57	0.616239	0.173717	6.77464e-06	0.000198052	75.5767	1.20548	0.458442	0.000907493	0.0177022	75.5767	0.222593	0.325781	0.283357	0.688086
ENSMUSG00000104316		6.51788	0.322065	0.532187	0.0489851	0.24817
ENSMUSG00000001138	Cnnm3	672.519	0.0666807	0.134761	0.379842	0.75052	95.9918	-0.0440578	0.306962	0.844123	0.961372	95.9918	-0.0963144	0.287647	0.612842	0.89691
ENSMUSG00000067653	Ankrd23	24.5505	-0.0356889	0.175836	0.655641	0.905099	2.34471	-0.142681	0.478636	0.128155	0.484452	2.34471	-0.0692685	0.38231	0.350016
ENSMUSG00000079610	Ankrd39	199.079	0.0242455	0.10183	0.704479	0.923056	36.8233	-0.345557	0.329317	0.158917	0.536941	36.8233	0.0771807	0.266214	0.688719	0.929103
ENSMUSG00000026121	Sema4c	86.7491	0.281661	0.247248	0.0226822	0.148506	2.03144	0.100648	0.459814	0.346338	0.740843	2.03144	-0.0525347	0.380431	0.494026
ENSMUSG00000087589	D430040D24Rik	11.5719	0.129013	0.27804	0.211668	0.583719	0.816871	0.0747312	0.455516	0.408883		0.816871	-0.0563058	0.384469	0.475539
ENSMUSG00000046337	Fam178b	571.561	0.0232103	0.0962813	0.705641	0.923183	239.794	-0.309824	0.25012	0.140231	0.507099	239.794	0.0718085	0.221629	0.687446	0.929035
ENSMUSG00000089906		4.80703	-0.00499647	0.272778	0.954988	0.990196
ENSMUSG00000061518	Cox5b	3233.64	-0.0356796	0.127014	0.622456	0.890745	2939.02	0.0843611	0.213233	0.655431	0.904607	2939.02	0.0806909	0.204429	0.599386	0.891476
ENSMUSG00000037351	Actr1b	2791.2	-0.0310594	0.102535	0.62877	0.893838	605.976	-0.26932	0.286351	0.233703	0.635272	605.976	-0.0886516	0.252077	0.641956	0.908635
ENSMUSG00000102416	RP23-247A1.6	1.91866	0.0419986	0.392922	0.617291		1.21728	0.0132697	0.445632	0.885548		1.21728	-0.0135426	0.374902	0.852585
ENSMUSG00000026117	Zap70	127.97	0.129135	0.14637	0.124994	0.438795	45.0673	0.235203	0.450614	0.287234	0.691031	45.0673	0.268438	0.448616	0.138865	0.501604
ENSMUSG00000026116	Tmem131	3344.45	-0.00323122	0.187723	0.967864	0.992961	223.144	-0.298677	0.377495	0.229644	0.630679	223.144	-0.55317	0.48481	0.0385555	0.256623
ENSMUSG00000103016		4.24314	-0.071526	0.299437	0.455178	0.806322
ENSMUSG00000102930	RP23-328J8.2	39.0352	-0.1027	0.251963	0.285975	0.666836	15.0376	-0.785938	0.713691	0.0279131	0.204448	15.0376	-0.286647	0.43131	0.146251	0.512904
ENSMUSG00000103159	RP23-328J8.3	49.4292	-0.11777	0.22875	0.218874	0.592454	8.85079	-0.0521241	0.415532	0.761787	0.937805	8.85079	-0.217145	0.441759	0.110749	0.450552
ENSMUSG00000050122	Vwa3b	133.156	0.146549	0.16285	0.102314	0.390054	194.536	-0.366161	0.359403	0.148209	0.51861	194.536	0.18214	0.300677	0.368789	0.758634
ENSMUSG00000103603	RP23-259P18.1	3.95561	0.0515779	0.327659	0.580695	0.875379	0.570205	-0.031685	0.452498	0.737619		0.570205	0.00440322	0.376909	0.93857
ENSMUSG00000026114	Cnga3	159.961	1.05636	0.209329	4.43609e-08	2.17844e-06	13.6328	0.80376	0.693611	0.0265604	0.198324	13.6328	2.71935	0.635091	1.11494e-06	7.91465e-05
ENSMUSG00000026113	Inpp4a	237.883	0.0398783	0.236409	0.647211	0.902112	53.1351	-0.0903258	0.316075	0.689882	0.91506	53.1351	-0.11843	0.296295	0.539755	0.861779
ENSMUSG00000086064		1.95719	-0.0736063	0.380215	0.436744	0.795924
ENSMUSG00000102879		1.21742	-0.223959	0.598339	0.0539134
ENSMUSG00000026112	Coa5	2043.04	-0.292238	0.131492	0.00240784	0.0279871	984.22	-0.0197557	0.274541	0.933271	0.984115	984.22	-0.0634167	0.257556	0.738755	0.940608
ENSMUSG00000026111	Unc50	1013.7	-0.0303861	0.129462	0.676612	0.912567	379.576	-0.0784438	0.280319	0.719547	0.925119	379.576	0.0254706	0.257917	0.896202	0.976811
ENSMUSG00000026110	Mgat4a	439.731	0.274785	0.15807	0.00764756	0.0678379	102.655	0.1572	0.378618	0.49255	0.828322	102.655	0.054553	0.322453	0.75777	0.945808
ENSMUSG00000103948		3.18045	0.0230801	0.358734	0.791442	0.947528
ENSMUSG00000026090	2010300C02Rik	92.112	0.52849	0.320217	0.00270529	0.0306193	16.9307	2.80279	1.09368	0.000414032	0.00945982	16.9307	2.12335	1.22338	0.00240579	0.0421152
ENSMUSG00000060771	Tsga10	126.467	0.0425333	0.126131	0.557465	0.865048	34.2809	-0.359917	0.375757	0.158934	0.536941	34.2809	-0.606948	0.461813	0.0287361	0.218429
ENSMUSG00000037216	Lipt1	174.466	-0.0690218	0.134645	0.364162	0.738371	35.5695	-0.496832	0.520986	0.0828224	0.387056	35.5695	-0.0779912	0.322912	0.661482	0.918486
ENSMUSG00000026088	Mitd1	492.674	-0.165123	0.156571	0.0681366	0.304573	276.731	0.114294	0.304374	0.619972	0.889914	276.731	0.11726	0.283624	0.547803	0.866768
ENSMUSG00000026087	Mrpl30	1196.13	-0.095976	0.141781	0.229484	0.606382	804.515	-0.00429961	0.224849	0.982182	0.995532	804.515	-0.0801686	0.216231	0.65332	0.9146
ENSMUSG00000058407	Txndc9	2864.24	-0.0985847	0.11188	0.161606	0.505951	1018.4	0.141244	0.265592	0.510565	0.838299	1018.4	0.132966	0.251743	0.501427	0.841476
ENSMUSG00000026083	Eif5b	2035.53	0.0554669	0.203021	0.512998	0.841643	802.769	0.125802	0.167551	0.414316	0.787626	802.769	-0.0382558	0.162334	0.793268	0.954157
ENSMUSG00000026082	Rev1	1352.61	-0.474128	0.131502	5.46299e-06	0.000162242	141.81	-0.222017	0.259015	0.296462	0.698134	141.81	0.181459	0.244338	0.342923	0.74043
ENSMUSG00000103804	RP23-195A24.4	49.252	-0.721439	0.370335	0.00100634	0.0138996	3.88285	0.167289	0.480569	0.210814	0.609496	3.88285	0.0564683	0.375643	0.523656	0.854009
ENSMUSG00000037138	Aff3	93.4332	1.12255	0.365072	5.45732e-05	0.00122114	13.2507	0.762505	0.761645	0.0330494	0.227632	13.2507	0.017175	0.337641	0.913471	0.980952
ENSMUSG00000085391	Gm16150	2.04864	0.338405	0.720777	0.0205405	0.138656	0.732467	0.0537481	0.45645	0.482928		0.732467	-0.00183321	0.377862	0.983303
ENSMUSG00000048814	Lonrf2	211.374	0.93375	0.211185	6.44664e-07	2.37578e-05	30.5437	0.945571	0.775674	0.0190498	0.160597	30.5437	0.40108	0.538249	0.0774101	0.377651
ENSMUSG00000026080	Chst10	208.113	0.417233	0.178379	0.000619724	0.00931041	24.7436	0.0369014	0.410846	0.840238	0.960118	24.7436	0.0612824	0.357981	0.650219	0.912813
ENSMUSG00000026078	Pdcl3	883.893	-0.10197	0.134837	0.194703	0.560094	315.978	-0.0923893	0.284194	0.676644	0.911868	315.978	0.0280931	0.260292	0.884048	0.973477
ENSMUSG00000103046	RP23-101P2.6	49.0221	-0.160636	0.220686	0.112292	0.413023	2.39731	0.0477942	0.444417	0.681953	0.912856	2.39731	-0.113593	0.403477	0.0482411
ENSMUSG00000103182		2.40355	-0.0674475	0.364559	0.476065	0.820757
ENSMUSG00000026077	Npas2	23.8655	0.00390643	0.174589	0.960416	0.991434	5.3752	0.383207	0.607042	0.0821187	0.385355	5.3752	0.0107889	0.358451	0.926717	0.983143
ENSMUSG00000073702	Rpl31	13893.4	-0.0472074	0.125328	0.514901	0.842543	4865.14	0.179477	0.299787	0.435684	0.798116	4865.14	0.0564361	0.267605	0.757246	0.945808
ENSMUSG00000003134	Tbc1d8	1020.58	-0.330362	0.129481	0.000736967	0.0108506	84.9561	-0.164402	0.299546	0.469251	0.814807	84.9561	0.29109	0.310138	0.172441	0.554868
ENSMUSG00000102607		5.25101	-0.401315	0.644085	0.0301337	0.179642
ENSMUSG00000003135	Cnot11	1836.62	-0.224927	0.154506	0.0202105	0.137122	171.025	-0.437173	0.30722	0.0688083	0.350726	171.025	-0.399419	0.30715	0.0693927	0.355951
ENSMUSG00000085894	Gm15832	45.144	0.127918	0.198055	0.169873	0.521102	2.65513	-0.0478882	0.432214	0.74381	0.932767	2.65513	0.0307137	0.365035	0.779167
ENSMUSG00000077704	Snord89	18.9622	-0.0551066	0.204429	0.516372	0.843146	1.53525	-0.0500061	0.443359	0.659105		1.53525	-0.0119531	0.370454	0.885996
ENSMUSG00000048234	Rnf149	921.869	0.0517472	0.108466	0.439648	0.797551	95.2772	-0.225008	0.271134	0.305875	0.707245	95.2772	-0.314717	0.281224	0.130769	0.488531
ENSMUSG00000064936	Gm23722	8.94764	-0.0401484	0.24917	0.649775	0.902546	1.71257	-0.0992168	0.456334	0.38966	0.771253	1.71257	-0.0558686	0.377455	0.49392
ENSMUSG00000050967	Creg2	62.8187	-0.415667	0.281709	0.00566449	0.0543531	1.4667	-0.0626965	0.461516	0.209267		1.4667	-0.0118515	0.378086	0.777315
ENSMUSG00000097083	D930019O06Rik	51.4241	-0.178356	0.242249	0.0954961	0.37427	11.4885	-0.1504	0.418991	0.462191	0.810074	11.4885	-0.203584	0.406997	0.215304	0.609529
ENSMUSG00000057173		26.6321	-0.19264	0.271167	0.0892031	0.358685
ENSMUSG00000026074	Map4k4	3403.1	-0.353357	0.120911	0.000201418	0.00361023	195.298	-0.520277	0.3177	0.0360704	0.237969	195.298	-0.720937	0.342658	0.00517947	0.073473
ENSMUSG00000026073	Il1r2	8.06061	0.614764	0.696414	0.0111675	0.0890932	4.04652	-0.134958	0.465284	0.286656	0.690842	4.04652	-0.0346472	0.37017	0.706351	0.93425
ENSMUSG00000026072	Il1r1	48.1591	0.975757	0.373225	0.000179124	0.00327582	3.25046	0.0252611	0.444712	0.807886	0.951895	3.25046	-0.000900913	0.373996	0.987977	0.997634
ENSMUSG00000070942	Il1rl2	43.3146	0.124515	0.233018	0.20079	0.568811	2.21962	0.0404917	0.444247	0.710457	0.922517	2.21962	0.0328687	0.374653	0.658918
ENSMUSG00000103230		1.28966	-0.143226	0.51367	0.124461
ENSMUSG00000026062	Slc9a2	3.14615	-0.161205	0.421866	0.171842	0.524169	1.75824	-0.141455	0.486774	0.0359765	0.237764	1.75824	-0.0825018	0.391144	0.144881
ENSMUSG00000103270		3.68294	0.0421953	0.32588	0.646746	0.901983
ENSMUSG00000041945	Mfsd9	47.8487	-0.0261069	0.152929	0.733588	0.932045	3.02721	-0.0829738	0.453959	0.425449	0.792122	3.02721	-0.0382629	0.375098	0.618177	0.898966
ENSMUSG00000060424		1.72067	-0.0196907	0.358547	0.820885
ENSMUSG00000045515	Pou3f3	37.3712	0.0466862	0.170892	0.560652	0.86664	1.74653	0.158356	0.478658	0.213561	0.612518	1.74653	-0.0454973	0.377163	0.603383
ENSMUSG00000060679	Mrps9	2429.39	-0.0387222	0.115477	0.576083	0.873822	573.677	-0.0253071	0.233985	0.895357	0.974821	573.677	0.0626671	0.222655	0.731416	0.939592
ENSMUSG00000077448		3.62919	0.0653026	0.341914	0.493786	0.831196
ENSMUSG00000041907	Gpr45	5.75102	0.178793	0.420608	0.146029	0.479709	2.07206	0.177487	0.505127	0.0309926	0.218646	2.07206	0.103672	0.398988	0.101607
ENSMUSG00000070939	Tgfbrap1	321.806	-0.189052	0.161763	0.0454062	0.235835	42.1025	0.00293521	0.263869	0.990641	0.997579	42.1025	-0.288335	0.287482	0.167239	0.546942
ENSMUSG00000041878		9.12992	-0.0489279	0.245178	0.581609	0.876105
ENSMUSG00000010290	AI597479	1418.85	-0.0415629	0.107973	0.532482	0.852344	172.718	0.221826	0.269307	0.314909	0.715553	172.718	0.325412	0.279639	0.121588	0.470213
ENSMUSG00000008136	Fhl2	14	0.0976069	0.266515	0.314433	0.694448	4.1002	-0.21109	0.498489	0.161043	0.539973	4.1002	-0.151219	0.408937	0.163524	0.541621
ENSMUSG00000094497	Gm8210	442.755	-0.0124623	0.138086	0.866372	0.969737	2.39389	-0.0153624	0.438376	0.899285	0.975955	2.39389	0.0564566	0.374903	0.5425
ENSMUSG00000099576		3.43868	0.0354207	0.302164	0.698029	0.920547
ENSMUSG00000066877	Nck2	425.454	-0.0959085	0.140941	0.228626	0.605109	36.9321	-0.44818	0.41383	0.0959172	0.419763	36.9321	-0.446231	0.430672	0.0659255	0.346243
ENSMUSG00000103422		3.6767	0.0199446	0.298843	0.824697	0.957046
ENSMUSG00000103945	RP23-435E15.3	23.9734	-0.0757552	0.246206	0.409643	0.774388	9.65522	-0.300671	0.458315	0.209554	0.607929	9.65522	-0.0209633	0.327737	0.89764	0.977265
ENSMUSG00000026051	1500015O10Rik	11.2052	0.0230393	0.21277	0.782776	0.94624	1.76888	0.0843683	0.452832	0.452002	0.805603	1.76888	0.0332078	0.374723	0.661931
ENSMUSG00000100764		1.36961	-0.0993678	0.442398	0.280948
ENSMUSG00000100635		1.71574	-0.0986378	0.430635	0.297976
ENSMUSG00000100480		7.50882	-0.0141676	0.23878	0.869146	0.970551
ENSMUSG00000057363	Uxs1	504.288	0.0249531	0.0903099	0.669603	0.911299	88.1125	-0.345696	0.280709	0.126261	0.481002	88.1125	-0.191669	0.253911	0.323707	0.725395
ENSMUSG00000090243		6.04735	-0.0863699	0.31797	0.383534	0.753391
ENSMUSG00000100701	Gm19587	3.6688	-0.0518498	0.318311	0.579059	0.874948	1.27848	0.0486605	0.449211	0.610048		1.27848	-0.00290328	0.374543	0.97754
ENSMUSG00000041763	Tpp2	5221.99	0.0134742	0.0784953	0.79609	0.949271	742.785	-0.436079	0.196646	0.0137969	0.129691	742.785	-0.244529	0.187451	0.133856	0.493504
ENSMUSG00000047343	Mettl21c	27.096	0.0947688	0.214962	0.296753	0.677485	4.27764	-0.141084	0.450659	0.375815	0.761849	4.27764	-0.0467388	0.36346	0.685922	0.928432
ENSMUSG00000091844	Gm8251	19.2371	0.0684386	0.23735	0.447195	0.801844	5.76984	0.136617	0.44505	0.425261	0.792023	5.76984	0.0504323	0.363855	0.676444	0.923917
ENSMUSG00000026049	Tex30	448.997	0.0714714	0.128538	0.338283	0.716742	447.56	-0.0487052	0.330514	0.82855	0.958561	447.56	0.0554055	0.299407	0.771409	0.949274
ENSMUSG00000026047	Kdelc1	514.86	-0.00264592	0.0840233	0.961907	0.991434	239.6	-0.354903	0.302836	0.13203	0.491604	239.6	-0.0548393	0.251837	0.768341	0.948702
ENSMUSG00000041684	Bivm	736.832	-0.0715542	0.105845	0.280671	0.660984	111.448	-0.293974	0.224718	0.133089	0.49293	111.448	-0.326391	0.226747	0.0806508	0.386483
ENSMUSG00000026048	Ercc5	1032.02	-0.274901	0.146774	0.00588537	0.0560493	124.273	0.0835905	0.274718	0.70543	0.920336	124.273	0.347643	0.303416	0.11116	0.451289
ENSMUSG00000101567	Txn-ps1	1.56769	-0.0434334	0.358971	0.630069		3.50587	-0.0968966	0.43665	0.536061	0.84989	3.50587	-0.114636	0.385601	0.322886	0.724497
ENSMUSG00000056870	Gulp1	157.723	0.117541	0.164731	0.175091	0.530553	29.5091	-0.405422	0.51749	0.120191	0.471196	29.5091	-0.462784	0.604116	0.0510211	0.300865
ENSMUSG00000102319	RP23-68D4.1	14.2594	0.070559	0.264617	0.448233	0.802506	0.735767	-0.032376	0.453201	0.655931		0.735767	-0.0350728	0.381502	0.476578
ENSMUSG00000101701		2.6014	-0.100406	0.386547	0.32325	0.701814
ENSMUSG00000026043		1.31814	0.15233	0.517409	0.119999
ENSMUSG00000026042	Col5a2	43.7777	1.59213	0.337735	1.36357e-07	5.90145e-06	2.02144	-0.0903714	0.447017	0.500321	0.831935	2.02144	-0.11377	0.395602	0.175564
ENSMUSG00000025995	Wdr75	5070.37	0.0128	0.105773	0.845004	0.963451	1492.43	0.122368	0.218578	0.524242	0.845387	1492.43	0.0808225	0.208051	0.636787	0.907678
ENSMUSG00000099850		1.49486	-0.000419264	0.356971	0.996123
ENSMUSG00000084817	Gm5526	12.2223	0.13883	0.310984	0.199878	0.567483	15.4455	0.132124	0.384349	0.548983	0.855945	15.4455	0.0550803	0.32978	0.745048	0.942021
ENSMUSG00000025993	Slc40a1	91.6185	1.20123	0.276542	9.14729e-07	3.2671e-05	6.06874	-0.0683906	0.444626	0.578163	0.872903	6.06874	-0.0214918	0.369771	0.811446	0.957537
ENSMUSG00000041144	Dnah7b	23.0069	1.18066	0.535576	0.000373949	0.00613866	6.22302	0.0195679	0.404967	0.917136	0.981387	6.22302	0.13049	0.37416	0.373488	0.763519
ENSMUSG00000101262		1.49477	0.0740499	0.404769	0.415248
ENSMUSG00000101337	Dnah7c	43.8205	0.810703	0.358862	0.000447425	0.00713893	2.33469	0.205329	0.50598	0.121039	0.472898	2.33469	0.00968514	0.370753	0.909849
ENSMUSG00000025986	Slc39a10	2607.59	-0.00914673	0.0691056	0.843923	0.963451	393.667	-1.08471	0.283985	1.63498e-05	0.000624356	393.667	-0.926682	0.287055	0.000138251	0.00480523
ENSMUSG00000100213	Gm28151	18.6943	-0.0608705	0.204056	0.476234	0.820757	2.41533	0.0409742	0.430366	0.785526	0.943948	2.41533	-0.0378565	0.368562	0.706416
ENSMUSG00000101447	Gm28826	2.39379	0.420672	0.784555	0.0143563	0.107855	1.74967	0.098313	0.468862	0.203128	0.599665	1.74967	0.077368	0.391337	0.0950238
ENSMUSG00000100033	Gm8337	2.45883	-0.0158742	0.314908	0.859763	0.967574	1.63653	-0.0547937	0.4604	0.175497		1.63653	-0.0307166	0.381462	0.377359
ENSMUSG00000100816		1.85263	0.43322	0.82458	0.0089881
ENSMUSG00000026109	Tmeff2	19.0784	0.469688	0.463949	0.0141242	0.106525	2.80419	0.121097	0.460486	0.339777	0.73467	2.80419	0.0369867	0.372415	0.679983
ENSMUSG00000045954		2.55001	0.289441	0.645515	0.039711	0.215317
ENSMUSG00000026107	Nabp1	2058.9	-0.280318	0.117366	0.00189166	0.0231676	189.97	-0.237292	0.282839	0.28958	0.693031	189.97	0.161543	0.259803	0.408562	0.790648
ENSMUSG00000099413	Gm17767	9.16646	0.233034	0.400587	0.0850637	0.349136	1.90287	-0.0188893	0.446972	0.825867	0.957702	1.90287	-0.0353727	0.378147	0.562323
ENSMUSG00000101741	Gm28055	10.7947	0.014971	0.212015	0.85717	0.966962	1.39205	-0.0720936	0.453504	0.437386		1.39205	-0.0494368	0.378896	0.488595
ENSMUSG00000018417	Myo1b	3359.98	0.0353391	0.0776669	0.486884	0.827438	393.1	0.745949	0.248807	0.000675049	0.0140661	393.1	0.692381	0.25159	0.00115649	0.0242183
ENSMUSG00000101724	Gm29453	7.65881	0.182765	0.424973	0.140818	0.470922	1.51819	-0.0713568	0.453842	0.491946		1.51819	0.0285445	0.374236	0.716941
ENSMUSG00000100313	Gm28323	15.2469	0.0287359	0.224653	0.735792	0.932806	2.52135	0.269922	0.566463	0.0355735	0.236337	2.52135	0.134909	0.408173	0.108459
ENSMUSG00000072324		7.69337	-0.0742897	0.277891	0.432703	0.792815
ENSMUSG00000062939	Stat4	155.022	-0.0185799	0.127109	0.796352	0.949369	22.6419	-0.289267	0.405465	0.240932	0.644197	22.6419	-0.101364	0.320709	0.576176	0.880701
ENSMUSG00000078291		1.14639	0.0527744	0.394156	0.54198
ENSMUSG00000109599		5.0948	-0.0499438	0.282394	0.587068	0.878673	0.899094	-0.00451934	0.446395	0.959415		0.899094	-0.0226958	0.376565	0.750123
ENSMUSG00000026104	Stat1	133.342	-0.141438	0.158704	0.109052	0.405763	48.1672	-0.366225	0.369455	0.150855	0.522652	48.1672	-0.123634	0.294748	0.52324	0.854009
ENSMUSG00000099569		3.01266	-0.166659	0.447747	0.159656	0.503346
ENSMUSG00000026103	Gls	3520.06	-0.218882	0.148788	0.0208294	0.139838	232.262	-0.694031	0.383491	0.0148723	0.136021	232.262	-0.862016	0.40573	0.00344144	0.0550664
ENSMUSG00000002881	Nab1	384.91	0.475559	0.151833	3.47726e-05	0.000829191	25.8047	-0.206361	0.349761	0.38872	0.770658	25.8047	-0.0712647	0.298547	0.703683	0.933407
ENSMUSG00000097833	Gm5976	4.3217	0.0352046	0.298311	0.69942	0.92103	24.169	-0.00625137	0.445644			24.169	-0.00392009	0.374639
ENSMUSG00000043015	Tmem194b	613.44	-0.203937	0.124445	0.0177057	0.125191	65.791	-0.391735	0.329652	0.1122	0.455167	65.791	-0.110577	0.268207	0.566296	0.87501
ENSMUSG00000103630	RP24-388H6.6	6.35304	-0.0603772	0.27678	0.515245	0.842873	2.59246	0.0835576	0.464014	0.371693	0.757422	2.59246	0.0799679	0.392691	0.040337
ENSMUSG00000041439	Mfsd6	120.488	0.0912351	0.152816	0.264186	0.644385	8.00013	0.162413	0.450337	0.366687	0.754415	8.00013	-0.0891771	0.373752	0.463636	0.821588
ENSMUSG00000026102	Inpp1	91.4383	-0.493358	0.28521	0.00238373	0.0278102	10.968	-0.403391	0.717626	0.0218277	0.175163	10.968	-0.293854	0.556722	0.0100223	0.112085
ENSMUSG00000041426	Hibch	550.349	-0.280598	0.180136	0.0102602	0.0843959	114.397	-0.226866	0.288054	0.316386	0.71632	114.397	-0.121424	0.260395	0.52825	0.855567
ENSMUSG00000089802		2.68192	-0.129434	0.414788	0.232868	0.609889
ENSMUSG00000043629	1700019D03Rik	1206.67	-0.768969	0.120665	1.63196e-11	1.4382e-09	296.936	-1.12849	0.362967	0.000201955	0.00523288	296.936	-0.850719	0.36933	0.00231561	0.0410948
ENSMUSG00000060715	1700019A02Rik	8.33315	0.0895345	0.272042	0.352796	0.728813	4.94368	-0.0988589	0.446882	0.479525	0.821367	4.94368	-0.0202886	0.366913	0.833486	0.965108
ENSMUSG00000026098	Pms1	1059.02	0.0144902	0.092737	0.808576	0.952186	303.448	-0.00857056	0.315425	0.967274	0.991378	303.448	-0.0164601	0.287283	0.929421	0.983216
ENSMUSG00000100763	Gm28777	5.68688	-0.0212259	0.27792	0.812184	0.953185	0.820382	-0.022423	0.449026	0.810671		0.820382	-0.0104821	0.376396	0.876936
ENSMUSG00000026097	Ormdl1	722.691	-0.0241343	0.11859	0.729876	0.930878	316.146	0.0453215	0.280858	0.839801	0.960118	316.146	0.0182669	0.259781	0.924008	0.982814
ENSMUSG00000026096	Osgepl1	409.491	-0.0143209	0.0943705	0.813177	0.953358	90.9248	-0.0783281	0.326009	0.731189	0.928621	90.9248	0.029708	0.29206	0.879828	0.973217
ENSMUSG00000099913	Gm28551	4.78867	0.0712856	0.322414	0.460535	0.810078	1.07773	0.0529053	0.455255	0.486234		1.07773	-0.0235945	0.379203	0.737092
ENSMUSG00000101838		3.68595	0.115139	0.389062	0.276099	0.657322
ENSMUSG00000026095	Asnsd1	447.15	0.00213341	0.121619	0.975851	0.9948	59.6911	0.0243425	0.258903	0.910531	0.978968	59.6911	-0.0269877	0.243099	0.884166	0.973477
ENSMUSG00000096141	Dnah7a	9.46321	0.470955	0.572821	0.0199375	0.135952	5.21347	0.307975	0.529385	0.153749	0.527949	5.21347	0.0678869	0.361689	0.612498	0.896878
ENSMUSG00000026094	Stk17b	760.458	0.129606	0.155723	0.133198	0.454704	135.352	-0.626745	0.401186	0.0280196	0.204674	135.352	-0.117695	0.285312	0.542313	0.863629
ENSMUSG00000042807	Hecw2	100.327	1.68148	0.229428	1.59697e-14	2.17833e-12	59.283	0.502174	0.370094	0.0613954	0.330043	59.283	0.787976	0.413183	0.006997	0.0898243
ENSMUSG00000025983	Ccdc150	24.5855	-0.0342448	0.180416	0.670431	0.911446	2.50643	0.115036	0.452396	0.418554	0.790411	2.50643	0.15294	0.411342	0.141177
ENSMUSG00000041303	Gtf3c3	3265.45	-0.0083933	0.097158	0.892141	0.9758	417.532	0.11451	0.28456	0.614502	0.888404	417.532	0.0335102	0.26025	0.863159	0.971387
ENSMUSG00000073678	Pgap1	2218.24	-0.539257	0.139713	1.59654e-06	5.40093e-05	125.459	-0.992698	0.423702	0.00217916	0.0346852	125.459	-1.29024	0.430881	0.000171537	0.00562196
ENSMUSG00000104136	RP24-290F15.1	14.567	-0.0244647	0.224148	0.773187	0.943517	1.25883	-0.055425	0.454604	0.481266		1.25883	-0.030412	0.378232	0.604297
ENSMUSG00000052331	Ankrd44	30.5108	0.899035	0.402166	0.000450908	0.00717763	8.26822	0.158621	0.423418	0.445732	0.802682	8.26822	0.117202	0.363739	0.453098	0.815684
ENSMUSG00000025982	Sf3b1	20380	-0.0187356	0.0920662	0.75264	0.938071	4703.69	0.367057	0.2577	0.0904033	0.406999	4703.69	0.296365	0.249751	0.134265	0.494302
ENSMUSG00000103030		3.59202	0.170968	0.43675	0.155865	0.496281
ENSMUSG00000025981	Coq10b	644.901	-0.0289128	0.117478	0.678113	0.913404	278.276	-0.163516	0.326081	0.4886	0.826508	278.276	0.110013	0.29308	0.5722	0.877831
ENSMUSG00000101122	Gm17971	17.1149	0.0117325	0.193104	0.884755	0.973938	3.39321	0.0773459	0.437557	0.597652	0.87978	3.39321	0.0385225	0.368013	0.70366	0.933407
ENSMUSG00000025980	Hspd1	12096.2	-0.0547261	0.121614	0.445582	0.800522	4868.2	-0.330829	0.261461	0.123863	0.477333	4868.2	-0.0377814	0.227637	0.813515	0.958697
ENSMUSG00000073676	Hspe1	5381.62	-0.0121399	0.132669	0.86803	0.970315	4445.09	-0.0932124	0.273324	0.672339	0.909941	4445.09	-0.0161401	0.251584	0.970573	0.993539
ENSMUSG00000089670		2.00535	-0.0722857	0.363498	0.450809	0.804541
ENSMUSG00000025979	Mob4	1744.7	-0.0656256	0.118632	0.356987	0.732562	857.583	0.0902098	0.300383	0.69314	0.916744	857.583	-0.0224902	0.273555	0.904613	0.979104
ENSMUSG00000061863		6.59906	0.12259	0.346369	0.254071	0.633997
ENSMUSG00000025978	Rftn2	78.7123	-0.152593	0.201389	0.116146	0.420554	12.5308	-0.0418036	0.393865	0.833796	0.959794	12.5308	0.0446482	0.343314	0.772158	0.949461
ENSMUSG00000097649		5.30903	-0.00994197	0.267867	0.910357	0.979898
ENSMUSG00000046994	Mars2	1073.94	-0.141625	0.123575	0.0724292	0.316567	198.352	-0.133895	0.226605	0.492389	0.828322	198.352	-0.279401	0.234814	0.137667	0.500072
ENSMUSG00000025977	Boll	87.6672	0.328435	0.262302	0.0137872	0.104372	15.2469	0.155056	0.420074	0.454176	0.806424	15.2469	0.117063	0.363011	0.447765	0.812698
ENSMUSG00000100215	Gm8292	46.8316	-0.208775	0.249877	0.064495	0.295037	30.9783	0.444005	0.491177	0.109585	0.450945	30.9783	0.0749018	0.32597	0.671502	0.922179
ENSMUSG00000101085		4.37404	0.00148738	0.275358	0.986612	0.996732
ENSMUSG00000038349	Plcl1	16.0337	0.424918	0.514694	0.0234543	0.151543	2.78389	0.213977	0.532011	0.00658865	0.0779485	2.78389	0.0615859	0.384595	0.514843
ENSMUSG00000099950	9130227L01Rik	1.85454	0.211284	0.553686	0.0831386		10.0078	0.627966	1.24467	0.016155	0.144472	10.0078	0.219123	0.452992	0.0857019	0.396763
ENSMUSG00000038331	Satb2	189.601	-0.0475571	0.174974	0.556127	0.864214	20.1706	-0.188867	0.383968	0.418816	0.790508	20.1706	-0.0349684	0.316709	0.842263	0.966006
ENSMUSG00000087022		14.0034	-0.00557828	0.206744	0.946025	0.988111
ENSMUSG00000097519	4930558J18Rik	76.3427	-0.23664	0.218936	0.0344967	0.194999	33.5524	-0.292681	0.359379	0.23873	0.640932	33.5524	-0.23317	0.332139	0.258873	0.664006
ENSMUSG00000038323	1700066M21Rik	469.565	-0.130379	0.150207	0.12594	0.440395	76.699	-0.778578	0.369883	0.00654698	0.0778294	76.699	-0.246726	0.293334	0.231238	0.632219
ENSMUSG00000048495	Tyw5	395.69	-0.049545	0.134794	0.508208	0.839163	226.057	-0.0417236	0.313238	0.849659	0.962697	226.057	-0.106016	0.294389	0.579968	0.883131
ENSMUSG00000025971	9430016H08Rik	358.189	-0.146291	0.126689	0.0687393	0.306442	256.298	0.0652582	0.285743	0.772202	0.941081	256.298	0.0475983	0.264236	0.80467	0.955369
ENSMUSG00000038305	Spats2l	158.726	-0.729697	0.205555	9.55001e-06	0.000268227	32.5037	-0.852795	0.495522	0.0119403	0.1181	32.5037	-0.333263	0.384141	0.132696	0.492045
ENSMUSG00000054770	Kctd18	626.86	-0.0819471	0.109012	0.229427	0.606321	94.6466	0.586296	0.359557	0.0301406	0.214577	94.6466	0.292728	0.311443	0.170887	0.552144
ENSMUSG00000026039	Sgol2	1713.94	-0.370934	0.118687	8.56319e-05	0.0017681	378.439	-0.147226	0.24837	0.478409	0.820495	378.439	-0.175709	0.242009	0.351505	0.747021
ENSMUSG00000063558	Aox1	112.409	0.123751	0.166684	0.158457	0.501516	11.2064	-0.0121016	0.410868	0.942811	0.985987	11.2064	-0.114421	0.376563	0.39341	0.778474
ENSMUSG00000064294	Aox3	264.588	-0.101689	0.126735	0.182018	0.540682	29.4935	-0.42481	0.565797	0.096043	0.419763	29.4935	-0.372264	0.54352	0.0666266	0.348267
ENSMUSG00000038242	Aox4	20.582	2.25485	0.475342	5.5541e-08	2.64887e-06	21.6175	2.94207	0.935249	0.000139009	0.00383976	21.6175	3.96773	0.899716	1.2375e-06	8.63825e-05
ENSMUSG00000079554	Aox2	6.33807	0.153189	0.373571	0.184611	0.544491	2.01143	0.249791	0.537797	0.0675767	0.347697	2.01143	0.126218	0.400174	0.16737
ENSMUSG00000103839	RP24-191N24.2	43.1739	-0.247806	0.277152	0.044675	0.233483	12.0186	0.064209	0.43303	0.668257	0.908139	12.0186	0.0293599	0.365249	0.784565	0.951923
ENSMUSG00000051223	Bzw1	11617.7	0.00291885	0.0970891	0.962375	0.991434	4663.01	-0.0431206	0.265306	0.847964	0.962215	4663.01	0.0309634	0.247097	0.874122	0.973034
ENSMUSG00000026034	Clk1	3380.48	-0.0474454	0.0995487	0.450935	0.804553	1174.13	0.119955	0.266009	0.582752	0.874706	1174.13	0.104693	0.250106	0.577605	0.881738
ENSMUSG00000026035	Ppil3	586.738	-0.0990104	0.144578	0.220321	0.593911	380.51	0.00629588	0.29011	0.980106	0.994706	380.51	0.228339	0.298391	0.27023	0.675998
ENSMUSG00000026036	Nif3l1	933.197	-0.0724584	0.108081	0.282119	0.661887	626.379	-0.142234	0.251321	0.493701	0.829115	626.379	-0.0850496	0.235164	0.64432	0.909776
ENSMUSG00000026037	Orc2	3758.05	0.104965	0.132093	0.179014	0.536225	755.916	-0.0231046	0.225829	0.900763	0.976361	755.916	0.201152	0.22641	0.27613	0.681755
ENSMUSG00000094245		4.11699	0.0534678	0.309622	0.567716	0.870049
ENSMUSG00000085054	Gm15834	12.6281	0.335776	0.444649	0.0377734	0.207724	5.80706	0.0023818	0.437317	0.987299	0.997045	5.80706	-0.00592741	0.369677	0.943553	0.986912
ENSMUSG00000038174	Fam126b	1527.85	0.00892083	0.0895348	0.878302	0.9724	128.032	0.286442	0.313781	0.230543	0.631299	128.032	0.0189397	0.265354	0.922294	0.982525
ENSMUSG00000026032	Ndufb3	925.59	-0.0187871	0.13141	0.796731	0.949376	686.718	0.0135173	0.240686	0.949431	0.98787	686.718	-0.0336393	0.227882	0.852333	0.968011
ENSMUSG00000047528	Als2cr12	4.41331	0.02906	0.281387	0.746768	0.936522	0.946637	-0.0653042	0.458904	0.429545		0.946637	0.00534117	0.376352	0.930446
ENSMUSG00000026031	Cflar	364.839	-0.0511185	0.10908	0.446829	0.801492	18.1501	-0.0201158	0.369001	0.923911	0.981917	18.1501	-0.031421	0.327045	0.849608	0.967501
ENSMUSG00000026029	Casp8	223.93	0.234948	0.170681	0.0211111	0.141262	17.9544	0.20818	0.412239	0.369217	0.755383	17.9544	-0.0462402	0.334305	0.77677	0.950938
ENSMUSG00000102719	RP24-273P12.4	5.58678	0.333544	0.608427	0.0433445	0.22863	37.6678	-0.0871957	0.40773	0.649768	0.902491	37.6678	-0.145406	0.38012	0.32564	0.726909
ENSMUSG00000099719		1.69503	0.0828592	0.423999	0.355959
ENSMUSG00000026028	Trak2	1716.35	0.173022	0.104115	0.021368	0.142471	110.851	0.73486	0.333383	0.00622131	0.0750081	110.851	0.0754535	0.253733	0.693475	0.930199
ENSMUSG00000026027	Stradb	289.403	-0.0198456	0.105904	0.762102	0.941206	101.935	0.0156594	0.299876	0.946709	0.987046	101.935	-0.0457864	0.276623	0.809109	0.957071
ENSMUSG00000072295	Als2cr11	9.97827	0.113854	0.294857	0.266004	0.646323	2.19069	0.153541	0.48971	0.0987161	0.426404	2.19069	0.123404	0.409078	0.0266189
ENSMUSG00000038079	Tmem237	390.161	-0.0560913	0.112958	0.415185	0.779269	103.329	-0.0369554	0.305313	0.868776	0.968483	103.329	-0.0386912	0.27996	0.837625	0.965336
ENSMUSG00000097573	G730003C15Rik	7.89295	-0.0992318	0.292971	0.319703	0.698618	3.63436	-0.153406	0.479068	0.187743	0.579335	3.63436	-0.11734	0.400261	0.120793	0.468764
ENSMUSG00000079550	Mpp4	23.917	0.780058	0.480999	0.00200576	0.0242597	12.6417	3.03412	0.845307	2.16916e-05	0.000793167	12.6417	2.26076	0.894206	0.000620902	0.0148812
ENSMUSG00000101586	Gm29017	32.6811	0.0748552	0.186768	0.377977	0.748838	5.46138	5.22756	1.56967	9.28692e-06	0.000375862	5.46138	3.56422	1.67856	0.000902204	0.0198095
ENSMUSG00000099563	Gm19125	2.09338	-0.0309226	0.366452	0.722752	0.929833	1.47658	0.115322	0.476375	0.0710477		1.47658	-0.00264895	0.380499	0.975151
ENSMUSG00000026024	Als2	2932.4	0.0606399	0.0852573	0.27034	0.650973	347.248	1.48052	0.375872	7.34649e-06	0.000307854	347.248	1.11743	0.384031	0.00031508	0.0089924
ENSMUSG00000099922	Gm29016	2.25117	0.254402	0.604079	0.0549201	0.267071	0.467224	-0.00968531	0.452633	0.93323		0.467224	0.029029	0.380394	0.594878
ENSMUSG00000041075	Fzd7	629.638	0.654288	0.135085	2.81782e-08	1.46448e-06	52.6036	-1.14594	0.662321	0.00565148	0.0700096	52.6036	-1.68912	0.645649	0.000430376	0.0113188
ENSMUSG00000097819	Gm26813	8.13082	0.23218	0.406642	0.0868057	0.353132	0.919984	-0.0762096	0.464127	0.185519		0.919984	-0.0459303	0.383307	0.316661
ENSMUSG00000047361	Gm973	33.8538	0.316572	0.372972	0.0342409	0.194	4.17225	0.383308	0.607469	0.0839872	0.389275	4.17225	0.091594	0.369968	0.479917	0.83215
ENSMUSG00000026021	Sumo1	3803.35	0.0372747	0.122341	0.601125	0.882657	3688.29	0.655055	0.362473	0.0186373	0.158394	3688.29	0.323316	0.315891	0.141504	0.506002
ENSMUSG00000103821	RP24-147G7.2	60.0041	-0.018492	0.150757	0.808081	0.952186	4.43478	0.0292488	0.422577	0.860648	0.96614	4.43478	-0.10952	0.384844	0.331207	0.73067
ENSMUSG00000101400		4.24109	0.0933733	0.349887	0.356056	0.731869
ENSMUSG00000026020	Nop58	8132.8	-0.085666	0.11719	0.232443	0.609303	3179.38	0.223946	0.260523	0.298127	0.700078	3179.38	0.155962	0.243902	0.412814	0.792894
ENSMUSG00000077345	Snord70	47.7977	-0.0558708	0.167048	0.487758	0.827824	8.80566	-0.0765851	0.424667	0.644709	0.90031	8.80566	0.0644577	0.362107	0.613662	0.896979
ENSMUSG00000089512	Gm26287	22.4065	-0.0355917	0.195575	0.665424	0.909008	2.33278	-0.0981812	0.456556	0.353636	0.745572	2.33278	-0.0439031	0.374226	0.603914
ENSMUSG00000089093	Snord11	15.7224	-0.0392169	0.204749	0.639032	0.898896	0.770821	-0.0066145	0.451115	0.960827		0.770821	0.0522816	0.382775	0.28761
ENSMUSG00000067336	Bmpr2	1278.53	0.0662352	0.15748	0.40841	0.773176	97.9366	-0.0623329	0.315718	0.783623	0.943948	97.9366	-0.112914	0.296979	0.555693	0.87013
ENSMUSG00000104052	RP24-178N19.2	7.25804	0.0335252	0.328303	0.712389	0.925808	2.75327	0.129893	0.457976	0.354165	0.746023	2.75327	0.0818519	0.379994	0.392479
ENSMUSG00000041040	Fam117b	1398.15	0.0842678	0.129144	0.265316	0.645815	90.2184	0.149926	0.289811	0.508593	0.837165	90.2184	-0.013048	0.261977	0.942683	0.986801
ENSMUSG00000103696	RP23-27C10.2	28.9383	0.0838646	0.242647	0.36487	0.73892	10.255	0.122517	0.432763	0.49036	0.82743	10.255	0.0268332	0.357048	0.831747	0.964818
ENSMUSG00000100901	Gm18829	9.60583	-0.110179	0.28629	0.275108	0.656732	3.93284	-0.164445	0.463592	0.300564	0.702837	3.93284	-0.116502	0.386012	0.322277	0.724032
ENSMUSG00000026018	Ica1l	63.9815	0.905382	0.30107	6.63611e-05	0.00142967	28.33	2.56564	0.473284	4.09357e-09	4.21393e-07	28.33	2.54363	0.473229	5.42838e-09	7.21759e-07
ENSMUSG00000026019	Wdr12	2038.66	-0.106477	0.108485	0.125932	0.440395	1174.08	-0.189721	0.283335	0.39203	0.771841	1174.08	0.00113514	0.25214	0.996339	0.99935
ENSMUSG00000026017	Carf	483.391	0.00420067	0.0924143	0.943907	0.987621	55.5333	-0.0870488	0.352295	0.698984	0.918029	55.5333	-0.138826	0.331226	0.456429	0.818164
ENSMUSG00000082609	Gm15464	10.1258	-0.046356	0.232364	0.595183	0.880805	1.50106	0.00147389	0.447287	0.9909		1.50106	-0.0397803	0.380051	0.509199
ENSMUSG00000073664	Nbeal1	3637.55	0.0622736	0.107357	0.350731	0.72677	351.591	-0.557841	0.420311	0.0489856	0.288955	351.591	-0.388427	0.387177	0.0941141	0.416554
ENSMUSG00000049439	Cyp20a1	791.999	-0.0493729	0.112591	0.47115	0.817274	137.576	-0.431857	0.307518	0.0736653	0.363041	137.576	-0.00995864	0.246607	0.955932	0.989897
ENSMUSG00000103822	RP23-264G9.1	10.995	0.0322931	0.229426	0.706904	0.923595	4.15559	-0.0365562	0.421614	0.824421	0.957234	4.15559	0.00829322	0.35851	0.947692	0.98754
ENSMUSG00000026782	Abi2	1697.34	-0.00885124	0.0759611	0.861485	0.967904	205.289	-0.724465	0.29538	0.00323335	0.0466435	205.289	-0.610334	0.297062	0.00824307	0.0993754
ENSMUSG00000026014	Raph1	1672.8	-0.0408838	0.148971	0.595054	0.880805	353.093	-0.975952	0.274877	5.6354e-05	0.00180609	353.093	-1.21044	0.277689	1.07547e-06	7.66699e-05
ENSMUSG00000081562	Gm11575	2.48388	-0.0810281	0.366893	0.407165	0.772628	1.29867	0.0141811	0.443507	0.893052		1.29867	-0.0392008	0.377854	0.496285
ENSMUSG00000084400		1.74844	0.0144928	0.371569	0.863668
ENSMUSG00000101188	Eif4a-ps4	173.208	-0.0430465	0.150506	0.577524	0.87449	368.327	-0.0377075	0.360538	0.86102	0.966148	368.327	-0.079611	0.326938	0.647743	0.911297
ENSMUSG00000081382	Rpl18-ps1	1.38026	-0.0535246	0.384022	0.546497		59.2106	0.0941571	0.445699			59.2106	0.0100309	0.367059
ENSMUSG00000052062	Pard3b	22.9605	0.0648048	0.208439	0.453077	0.805806	3.30176	0.27041	0.539695	0.0935698	0.414187	3.30176	0.0950146	0.382471	0.338136	0.736513
ENSMUSG00000103656		1.56158	0.0401866	0.35275	0.65618
ENSMUSG00000104402		1.34392	0.0270534	0.406955	0.723719
ENSMUSG00000084333	Gm11599	1.39778	0.0643592	0.378409	0.48613		1.17044	0.0571958	0.455721	0.370073		1.17044	-0.0103789	0.377628	0.989093
ENSMUSG00000025969	Nrp2	345.89	-1.16917	0.149621	6.49789e-16	1.08252e-13	16.6047	-2.19757	0.886903	0.000513751	0.0112237	16.6047	-0.406218	0.599162	0.049851	0.297183
ENSMUSG00000103032		3.84859	-0.247919	0.569103	0.069294	0.30818
ENSMUSG00000040865	Ino80d	2240.88	0.0662185	0.171298	0.419553	0.782882	559.402	0.413245	0.426511	0.128048	0.484392	559.402	0.124908	0.317262	0.513349	0.848456
ENSMUSG00000081429	Rps27-ps1	2.73636	-0.125946	0.440514	0.22694	0.603211	14.1992	0.0642764	0.450982	0.525605	0.845517	14.1992	0.0583539	0.380969	0.407563	0.790153
ENSMUSG00000084799	Ino80dos	70.5178	-0.0494286	0.150603	0.524821	0.84823	15.2557	0.188936	0.437614	0.361453	0.750068	15.2557	0.151784	0.37962	0.328681	0.729614
ENSMUSG00000101599	Gm20342	323.199	-0.0197708	0.131308	0.786346	0.946799	56.8878	0.183296	0.39856	0.422168	0.791085	56.8878	-0.00432445	0.327057	0.976488	0.995135
ENSMUSG00000025968	Ndufs1	3820.01	0.00565105	0.111144	0.933155	0.985913	985.047	-0.137723	0.203195	0.446491	0.803107	985.047	0.0429722	0.192818	0.798909	0.954157
ENSMUSG00000077884		4.18498	-0.0854487	0.322856	0.388724	0.75856
ENSMUSG00000025967	Eef1b2	14093.4	-0.0834833	0.130009	0.271021	0.651709	6983.52	0.0955147	0.211923	0.612844	0.888093	6983.52	0.128504	0.206086	0.42264	0.799705
ENSMUSG00000064612		2.49716	0.0122899	0.311726	0.891057	0.975753
ENSMUSG00000064602	Snora41	32.6519	-0.0828827	0.17654	0.326661	0.704434	10.5867	-0.170194	0.404682	0.43491	0.797658	10.5867	-0.555107	0.744413	0.0326193	0.234336
ENSMUSG00000046856	Gpr1	36.091	0.19493	0.271215	0.0865518	0.352441	16.5839	0.218574	0.394429	0.362249	0.75086	16.5839	-0.135569	0.344285	0.451177	0.815255
ENSMUSG00000086730	Gm11607	61.4912	-0.0764862	0.157926	0.345897	0.723162	37.7405	-0.16242	0.333419	0.48607	0.824895	37.7405	-0.221781	0.332466	0.273817	0.680199
ENSMUSG00000102536	RP23-434D24.3	5.76856	-0.121097	0.360157	0.260287	0.639943	0.947701	-0.0417107	0.458352	0.305308		0.947701	-0.029014	0.382103	0.300411
ENSMUSG00000087561	Gm11608	10.0335	0.0604736	0.248261	0.502923	0.836227	3.03838	-0.187053	0.480747	0.223499	0.622417	3.03838	-0.0277443	0.363917	0.797045	0.954157
ENSMUSG00000027520	Zdbf2	2076.71	-0.0147594	0.19654	0.856146	0.96665	273.661	-0.53467	0.296638	0.0255955	0.194077	273.661	-0.360247	0.281476	0.0843996	0.393638
ENSMUSG00000094214		1.67493	0.236777	0.610391	0.0491261
ENSMUSG00000081643	Gm11605	2.53916	-0.00614012	0.336906	0.94468	0.987621	2.01841	-0.0485987	0.441404	0.687498	0.914611	2.01841	0.0561432	0.373769	0.552229
ENSMUSG00000025964	Adam23	841.117	0.421444	0.207122	0.00137608	0.0179082	22.3618	-0.451877	0.520971	0.0991548	0.427714	22.3618	-0.283412	0.420833	0.156405	0.531271
ENSMUSG00000025963	Mdh1b	3.54199	-0.0486178	0.317165	0.601167	0.882662	1.91886	0.0494409	0.440395	0.696993	0.917696	1.91886	0.0653854	0.376626	0.492657
ENSMUSG00000025962	Fastkd2	1856.76	-0.0812094	0.12904	0.281523	0.661497	705.525	-0.184421	0.332703	0.431469	0.796166	705.525	-0.0308424	0.286906	0.869003	0.971984
ENSMUSG00000025961		21.1993	0.0620118	0.201436	0.467029	0.814484
ENSMUSG00000025959	Klf7	335.432	0.119299	0.162393	0.167647	0.516816	18.2059	-0.168278	0.372245	0.46186	0.810067	18.2059	-0.325352	0.425273	0.132937	0.492633
ENSMUSG00000086836		3.04645	0.0487653	0.338968	0.598446	0.881861
ENSMUSG00000025958	Creb1	1362.68	-0.0681278	0.109173	0.314199	0.693994	151.864	-0.371943	0.311026	0.12023	0.471196	151.864	-0.389451	0.318058	0.0804862	0.385914
ENSMUSG00000025956	Mettl21a	394.497	0.0550661	0.11993	0.439486	0.797551	88.8778	0.066296	0.308662	0.772732	0.941317	88.8778	0.152061	0.296701	0.443796	0.810755
ENSMUSG00000101832		4.05725	-0.00843989	0.307461	0.924979	0.983559
ENSMUSG00000087213	2810408I11Rik	123.408	0.0482405	0.132836	0.516639	0.843146	67.6445	-0.14292	0.307261	0.534579	0.848953	67.6445	0.0698685	0.275586	0.71906	0.936808
ENSMUSG00000070871	Ccnyl1	544.478	-0.0364508	0.0941852	0.545669	0.860051	65.5482	-0.435167	0.405856	0.105249	0.441436	65.5482	-0.464933	0.432498	0.0609437	0.331652
ENSMUSG00000045005	Fzd5	2688.65	-0.943409	0.149987	4.70713e-11	3.89427e-09	102.198	-0.246475	0.30005	0.28554	0.690098	102.198	-0.54626	0.360125	0.0273218	0.213114
ENSMUSG00000102140		6.1463	-0.0637218	0.299598	0.500768	0.834979
ENSMUSG00000051344	Plekhm3	716.983	0.383036	0.20293	0.0024413	0.0282358	187.44	1.89206	0.3667	1.78998e-08	1.52036e-06	187.44	1.61235	0.371315	9.59109e-07	6.86665e-05
ENSMUSG00000097264		1.25127	-0.0529898	0.387572	0.546913
ENSMUSG00000084416	Rpl10a-ps1	206.743	-0.0180101	0.118854	0.796578	0.949376	191.703	0.100615	0.316792	0.663846	0.906719	191.703	0.0740791	0.288523	0.700261	0.931885
ENSMUSG00000025955	Akr1cl	9.33431	0.606346	0.681304	0.0114398	0.090635	1.8822	0.000218432	0.437007	0.999526	0.999877	1.8822	0.00563742	0.369155	0.952367
ENSMUSG00000090042		1.82777	0.0449212	0.379027	0.608202
ENSMUSG00000070870	Cryge	11.5976	0.256589	0.434618	0.0729461	0.317912	4.06109	-0.121728	0.468471	0.244647	0.647833	4.06109	-0.108537	0.399272	0.109217	0.447801
ENSMUSG00000067299	Crygd	5.89393	0.164381	0.390844	0.166263	0.514722	3.46058	-0.0262103	0.437086	0.838915	0.960118	3.46058	0.0355589	0.370311	0.715525	0.93649
ENSMUSG00000025952	Crygc	1.70744	0.204695	0.552694	0.0844705		4.45074	0.0259288	0.439825	0.829306	0.95885	4.45074	0.0163312	0.370765	0.853573	0.96837
ENSMUSG00000044429	Cryga	5.7364	0.0529281	0.27194	0.563233	0.867161	1.50727	0.149593	0.46747	0.2899		1.50727	0.0607846	0.375685	0.51174
ENSMUSG00000044816	D630023F18Rik	129.931	0.15126	0.177593	0.104035	0.39415	197.471	0.452531	0.401837	0.098275	0.425565	197.471	0.612222	0.460023	0.0294892	0.221469
ENSMUSG00000025950	Idh1	6878.85	0.199677	0.179093	0.0446558	0.233433	2103.59	-0.203779	0.243418	0.323699	0.720973	2103.59	0.0446687	0.222511	0.795947	0.954157
ENSMUSG00000025949	Pikfyve	6473.6	0.0285252	0.0722378	0.549216	0.861952	305.716	-0.136195	0.2942	0.542992	0.853527	305.716	-0.211504	0.293176	0.295174	0.698328
ENSMUSG00000025946	Pth2r	2.12066	0.0085354	0.335566	0.923301	0.983253	1.30434	0.0743234	0.451962	0.498943		1.30434	0.0580127	0.379588	0.463149
ENSMUSG00000015222	Map2	195.153	0.0149189	0.124531	0.834302	0.959945	16.3457	-1.01241	0.626752	0.0095401	0.0999995	16.3457	-1.33447	0.66383	0.00202384	0.0369339
ENSMUSG00000055567	Unc80	20.3314	0.565901	0.482402	0.00781753	0.0689349	10.1618	-0.089032	0.435808	0.562198	0.864194	10.1618	-0.178458	0.42586	0.106812	0.442707
ENSMUSG00000026005	Rpe	2636.54	-0.0171429	0.103274	0.790427	0.947518	1190.93	-0.191045	0.232537	0.339392	0.734258	1190.93	0.0628565	0.215337	0.721922	0.937185
ENSMUSG00000026004	Kansl1l	632.494	0.0188345	0.105262	0.773027	0.943495	135.467	-0.332084	0.442286	0.185616	0.576517	135.467	-0.267543	0.401552	0.178687	0.563649
ENSMUSG00000102559	RP24-429G21.5	48.7819	-0.141922	0.243025	0.161205	0.505608	10.891	-0.113764	0.396169	0.587288	0.875701	10.891	-0.111032	0.352362	0.4959	0.83956
ENSMUSG00000102374	RP24-429G21.4	41.2151	-0.0257939	0.18297	0.748018	0.936522	55.6948	-0.112712	0.380778	0.606227	0.885006	55.6948	0.0468428	0.327523	0.784131	0.951923
ENSMUSG00000102776	RP24-429G21.3	35.2352	-0.0374038	0.185131	0.645153	0.901324	23.1941	-0.155099	0.414811	0.457771	0.808055	23.1941	-0.32799	0.509321	0.0826257	0.389421
ENSMUSG00000082057	Gm15789	17.8061	-0.0895991	0.24738	0.33974	0.717946	4.05264	0.0695448	0.43373	0.645875	0.900991	4.05264	-0.0742023	0.375091	0.488894	0.835759
ENSMUSG00000103756	RP24-429G21.1	32.3939	-0.0448965	0.182417	0.581543	0.87606	2.85616	0.0695502	0.450246	0.514125	0.839816	2.85616	-0.00263718	0.37373	0.969475
ENSMUSG00000103382	RP24-429G21.6	31.4921	0.0146438	0.212377	0.860311	0.967574	3.81214	0.0532145	0.434754	0.70848	0.921957	3.81214	-0.095017	0.386126	0.292627	0.695984
ENSMUSG00000103553	RP24-429G21.7	3.88441	0.0461477	0.314016	0.618482	0.889334	0.694007	-0.0446414	0.454186	0.608653		0.694007	-0.00676085	0.37679	0.916418
ENSMUSG00000026003	Acadl	314.69	0.0914753	0.185082	0.291092	0.671939	86.2306	-0.623011	0.38314	0.0264151	0.19768	86.2306	-0.182682	0.2917	0.359873	0.751461
ENSMUSG00000082769		1.29155	-0.199876	0.569469	0.0706359
ENSMUSG00000026000	Lancl1	972.212	-0.105232	0.120648	0.157147	0.499108	423.311	-0.00642644	0.228011	0.971831	0.992369	423.311	0.241137	0.232939	0.198928	0.591524
ENSMUSG00000025991		64.1713	0.14114	0.190164	0.13247	0.453367
ENSMUSG00000101387	Pced1c-ps	6.5387	0.0772253	0.281086	0.41803	0.781682	0.834567	0.0205086	0.451754	0.855225		0.834567	0.0219176	0.378691	0.680611
ENSMUSG00000101156		2.20104	-0.0879713	0.429613	0.330777	0.709287
ENSMUSG00000025997	Ikzf2	84.8959	-0.171096	0.20938	0.0902166	0.36089	10.443	0.0547344	0.407559	0.775223	0.94217	10.443	-0.154673	0.392779	0.263486	0.668616
ENSMUSG00000053153	Spag16	33.2834	1.01867	0.432965	0.00031857	0.00536233	4.9181	-0.0371384	0.441805	0.750262	0.935424	4.9181	0.120944	0.399173	0.173646	0.556444
ENSMUSG00000026196	Bard1	1512.24	0.0241994	0.136929	0.744175	0.936522	149.476	-0.496433	0.253599	0.0210099	0.171471	149.476	-0.400814	0.248831	0.044364	0.27982
ENSMUSG00000089965	Gm16236	10.2833	0.0133466	0.261531	0.879382	0.972557	1.58853	-0.120109	0.471329	0.205661		1.58853	-0.0334947	0.376182	0.612052
ENSMUSG00000050296	Abca12	5.40079	0.418178	0.62795	0.0281815	0.171665	3.61219	-0.0453753	0.437938	0.725084	0.926875	3.61219	-0.109209	0.393513	0.232136	0.633061
ENSMUSG00000026192	Atic	4471.01	-0.0379685	0.0864987	0.498709	0.834257	488.207	-0.387983	0.265201	0.0766413	0.370417	488.207	-0.588089	0.286538	0.0087849	0.103497
ENSMUSG00000026193	Fn1	28946.8	-0.0205253	0.186709	0.798712	0.949618	1557.8	-0.473831	0.403023	0.0799459	0.378753	1557.8	-0.750932	0.4751	0.011678	0.123597
ENSMUSG00000073652	Apol7d	52.2867	-0.0248289	0.149287	0.744387	0.936522	10.612	-0.245229	0.448498	0.270318	0.675515	10.612	-0.146205	0.366221	0.381718	0.770387
ENSMUSG00000101834		1.85396	0.0824846	0.43385	0.341959
ENSMUSG00000100319	Gm5256	7.35086	0.0658465	0.272051	0.479368	0.823307	0.914833	-0.0359446	0.448098	0.764696		0.914833	0.0554784	0.379583	0.468023
ENSMUSG00000101496	Gm8885	2.29645	-0.00142375	0.343001	0.987077	0.996732	11.0988	0.067133	0.389851	0.749415	0.935112	11.0988	0.227962	0.406224	0.209998	0.603862
ENSMUSG00000039395	Mreg	6085.96	1.72472	0.11573	2.51197e-51	7.63732e-48	742.702	0.226742	0.282814	0.31627	0.71632	742.702	0.372494	0.303679	0.090081	0.406113
ENSMUSG00000094655	Gm25360	990.23	-0.126044	0.318224	0.236598	0.613963	4.09255	-0.0678247	0.419208	0.69944	0.918174	4.09255	-0.106552	0.374958	0.418652	0.79719
ENSMUSG00000094050		15.5495	0.0559825	0.234428	0.526385	0.848967
ENSMUSG00000093956	Gm24497	14.0401	0.0575807	0.232268	0.514313	0.8424	6.60644	0.00781158	0.416278	0.964698	0.991218	6.60644	0.0178144	0.35712	0.886913	0.974625
ENSMUSG00000093843	Gm25939	10.5756	-0.0569931	0.235527	0.519985	0.844735	1.95093	-0.0131266	0.436786	0.917903	0.981387	1.95093	0.0418305	0.371782	0.652737
ENSMUSG00000026189	Pecr	357.723	0.108894	0.140522	0.177426	0.533968	175.781	-0.0234639	0.271602	0.908562	0.978313	175.781	-0.116899	0.260911	0.536056	0.860535
ENSMUSG00000026188		8.82922	0.0939313	0.281552	0.337312	0.716301
ENSMUSG00000026187	Xrcc5	3943.31	0.0195069	0.0931338	0.744959	0.936522	900.938	-0.195827	0.241804	0.334873	0.731331	900.938	0.0448659	0.221601	0.800728	0.954428
ENSMUSG00000039372		3.2735	0.281309	0.581855	0.0582263	0.27713
ENSMUSG00000039354	Smarcal1	1078.56	-0.271106	0.101972	0.00110887	0.0150718	244.967	0.0701357	0.278197	0.749841	0.935252	244.967	0.134314	0.266707	0.490045	0.836346
ENSMUSG00000110712		11.8008	-0.0869127	0.253851	0.356035	0.731869	1.40391	0.128954	0.46917	0.236864		1.40391	0.0907977	0.388804	0.245737
ENSMUSG00000046330	Rpl37a	15586.3	-0.0393123	0.129563	0.591307	0.879681	5292.12	0.182977	0.322038	0.430977	0.79555	5292.12	0.0920797	0.286853	0.642414	0.908635
ENSMUSG00000039323	Igfbp2	16151.3	0.148603	0.1514	0.0893142	0.358895	587.659	-0.174799	0.383879	0.441634	0.800761	587.659	-0.0278589	0.318859	0.869331	0.971984
ENSMUSG00000026185	Igfbp5	45.7312	0.280713	0.291414	0.032282	0.18752	6.56486	2.14934	0.916672	0.00109867	0.0204419	6.56486	1.3421	1.12091	0.00854468	0.102031
ENSMUSG00000101968		1.49172	0.121215	0.480707	0.186253
ENSMUSG00000100301	6030407O03Rik	26.1583	0.149188	0.240438	0.144023	0.475832	1.23901	0.0275952	0.44955	0.800573		1.23901	0.070223	0.386993	0.243262
ENSMUSG00000101344	Gm29183	22.4361	0.0282627	0.190479	0.72805	0.930251	0.857156	-0.00119322	0.449366	0.99348		0.857156	0.0257683	0.377841	0.677089
ENSMUSG00000098504		1.12562	-0.0891568	0.458181	0.27274
ENSMUSG00000055322	Tns1	1261.55	-0.0670452	0.164409	0.408946	0.773648	10.8541	-0.0635157	0.401248	0.740659	0.931856	10.8541	-0.210964	0.418282	0.171779	0.553964
ENSMUSG00000061815		11.1949	-0.542233	0.590084	0.0136082	0.103306
ENSMUSG00000006304	Arpc2	3603.01	-0.0324669	0.0998822	0.606762	0.885045	1472.94	-0.0240026	0.240657	0.907929	0.978313	1472.94	0.18567	0.239317	0.322169	0.723887
ENSMUSG00000064272		13.6714	0.0062514	0.218708	0.940493	0.986986
ENSMUSG00000006299	Aamp	3468.39	-0.0183108	0.114691	0.789596	0.947518	753.047	-0.573724	0.317166	0.0220636	0.176332	753.047	-0.29991	0.28393	0.147117	0.514219
ENSMUSG00000026179	Pnkd	548.991	-0.0395309	0.0915606	0.502212	0.8357	295.399	-0.501962	0.292247	0.0334237	0.22921	295.399	-0.217497	0.255478	0.264269	0.669714
ENSMUSG00000103013	RP23-280F6.5	8.67866	-0.0487657	0.238259	0.5798	0.874948	1.73004	0.0383663	0.445672	0.71897	0.924905	1.73004	-0.00908059	0.373977	0.899346
ENSMUSG00000006301	Tmbim1	729.625	-0.480246	0.145291	1.77059e-05	0.000462083	360.935	0.0607503	0.239878	0.765385	0.938935	360.935	-0.210361	0.243155	0.26928	0.675539
ENSMUSG00000103403	RP23-280F6.6	15.2994	-0.173376	0.323212	0.135136	0.458298	12.3228	-0.288332	0.470465	0.213019	0.612174	12.3228	-0.0587399	0.340749	0.70756	0.934355
ENSMUSG00000073650	Catip	62.4845	-1.18836	0.299386	3.72121e-06	0.000115475	6.80666	-0.229608	0.482246	0.224993	0.62377	6.80666	-0.0899134	0.367264	0.493014	0.838122
ENSMUSG00000026177	Slc11a1	227.703	-2.26776	0.174404	6.08389e-40	1.05699e-36	71.7196	-0.73373	0.640688	0.0282609	0.20588	71.7196	-1.34732	0.701641	0.00218685	0.0391743
ENSMUSG00000026176	Ctdsp1	319.196	-0.392876	0.299278	0.00904528	0.0767918	60.2206	-0.406331	0.394605	0.120643	0.471837	60.2206	-0.901225	0.499683	0.00605204	0.0812049
ENSMUSG00000065468		3.77823	0.0701583	0.324712	0.466924	0.814484
ENSMUSG00000026175	Vil1	108.126	0.177059	0.181227	0.0679432	0.304007	2.90067	0.000631268	0.43577	0.99866	0.999865	2.90067	-0.0361963	0.372468	0.670735
ENSMUSG00000033364	Usp37	5772.05	-0.0319167	0.0704781	0.489992	0.828697	760.21	0.346936	0.241686	0.0937997	0.414817	760.21	0.0933504	0.21675	0.590595	0.887617
ENSMUSG00000103227	RP23-102B12.2	64.6015	0.0354243	0.182917	0.661221	0.906895	17.1652	0.163434	0.407123	0.45268	0.805985	17.1652	-0.181337	0.385498	0.27132	0.677312
ENSMUSG00000026174	Rqcd1	2928.4	-0.100118	0.103382	0.133508	0.455273	1514.41	0.118559	0.26088	0.582807	0.874719	1514.41	-0.0941105	0.245811	0.615442	0.897704
ENSMUSG00000026173	Plcd4	21.1691	0.527608	0.525033	0.0121923	0.0948059	18.5473	0.17039	0.446108	0.371828	0.757498	18.5473	0.182486	0.408196	0.212089	0.606749
ENSMUSG00000026135	Zfp142	688.097	0.0222818	0.148272	0.76912	0.942908	165.853	-0.158899	0.362925	0.491004	0.82801	165.853	-0.122692	0.325002	0.504478	0.84344
ENSMUSG00000093155		8.95202	-0.109261	0.279029	0.275081	0.656732
ENSMUSG00000026172	Bcs1l	311.076	-0.431512	0.180322	0.00049033	0.00766425	167.316	-0.280148	0.234001	0.163607	0.543854	167.316	-0.0521612	0.211131	0.765451	0.947795
ENSMUSG00000026171	Rnf25	893.985	-0.0883146	0.123468	0.233634	0.610978	64.0299	-0.0608757	0.335022	0.785575	0.943948	64.0299	-0.131626	0.317388	0.486788	0.834622
ENSMUSG00000033276	Stk36	73.4296	-0.00589876	0.176044	0.940399	0.986983	28.0448	-0.268285	0.416459	0.263003	0.668424	28.0448	-0.108988	0.331483	0.541625	0.863107
ENSMUSG00000033257	Ttll4	2525.29	0.185108	0.129242	0.0303042	0.180394	247.37	0.0784074	0.24968	0.70934	0.922205	247.37	-0.174241	0.247527	0.361175	0.75272
ENSMUSG00000026170	Cyp27a1	164.101	0.166789	0.163762	0.0707074	0.311846	3.31961	0.0858621	0.449381	0.489187	0.826854	3.31961	0.0763896	0.381483	0.382109	0.770399
ENSMUSG00000006542		5.15443	0.735426	0.972245	0.0044621	0.0453477
ENSMUSG00000033227	Wnt6	34.0423	0.0630812	0.198046	0.457876	0.808076	5.56115	-0.252721	0.510137	0.168325	0.551506	5.56115	0.0208652	0.356083	0.875188	0.973217
ENSMUSG00000099472	Gm29539	3.37676	0.243515	0.537897	0.0791653	0.334576	0.753874	0.00705332	0.450871	0.999952		0.753874	-0.00023862	0.377544	0.994728
ENSMUSG00000026167	Wnt10a	5.37047	0.168098	0.405221	0.161245	0.505669	1.42448	0.00936404	0.444805	0.922553		1.42448	0.0449844	0.377602	0.538827
ENSMUSG00000090071	Cdk5r2	21.7084	0.283972	0.392439	0.0508425	0.254226	1.29142	-0.0450928	0.449088	0.621361		1.29142	-0.0675518	0.385278	0.309893
ENSMUSG00000047021	Ccdc108	1.33807	0.0837438	0.41262	0.366498		1.06289	-0.00913828	0.447095	0.933755		1.06289	0.0477113	0.379789	0.470633
ENSMUSG00000006538	Ihh	6.48236	0.0998459	0.330695	0.328413	0.70681	2.94737	-0.0337796	0.436167	0.791668	0.946265	2.94737	0.0053056	0.366762	0.959129	0.990747
ENSMUSG00000026162	Nhej1	189.425	0.0388859	0.129933	0.595677	0.880888	63.2062	0.0254803	0.296612	0.911715	0.978968	63.2062	0.203125	0.298407	0.320598	0.7221
ENSMUSG00000026205	Slc23a3	4.39894	0.0718011	0.331077	0.458169	0.808138	3.09469	-0.0705968	0.44999	0.510902	0.838488	3.09469	-0.0565877	0.379165	0.446235	0.811455
ENSMUSG00000033159	Cnppd1	793.737	0.0580274	0.109605	0.390495	0.759597	89.2738	0.429733	0.366347	0.100364	0.430894	89.2738	0.404881	0.367663	0.0848348	0.394898
ENSMUSG00000049339	Fam134a	642.089	-0.00692854	0.0760465	0.891534	0.9758	99.698	-0.202494	0.302183	0.378564	0.764189	99.698	0.0583778	0.265806	0.759851	0.945808
ENSMUSG00000026197	Zfand2b	156.144	-0.457837	0.218112	0.000994505	0.013791	157.07	-0.145549	0.266456	0.500696	0.832152	157.07	-0.0340558	0.243628	0.85411	0.968454
ENSMUSG00000026198	Abcb6	87.6598	0.125054	0.167402	0.155435	0.495693	2.84665	-0.183825	0.480404	0.221095	0.619588	2.84665	-0.15556	0.412615	0.130005
ENSMUSG00000033124	Atg9a	290.089	-0.0167186	0.113104	0.806054	0.951459	25.3082	0.329353	0.521139	0.149223	0.520204	25.3082	0.231486	0.429095	0.158661	0.535187
ENSMUSG00000026199	Ankzf1	1181.95	-0.00140706	0.0958548	0.981693	0.996367	56.8546	-0.0625778	0.334065	0.781208	0.943437	56.8546	0.0969292	0.306323	0.609619	0.895167
ENSMUSG00000026200	Glb1l	282.142	-0.150755	0.136442	0.0721432	0.315768	29.9368	0.228509	0.402966	0.336689	0.732423	29.9368	0.112336	0.335797	0.527739	0.855567
ENSMUSG00000026201	Stk16	489.457	-0.226881	0.131832	0.0123819	0.0959432	351.863	0.0250548	0.290743	0.913637	0.979743	351.863	0.0126245	0.267959	0.949463	0.988034
ENSMUSG00000026202	Tuba4a	2372.07	-0.0112224	0.105607	0.863767	0.968766	3304.63	-0.0312127	0.420575	0.841745	0.960335	3304.63	-0.0212517	0.359228	0.872558	0.972181
ENSMUSG00000096094	A630095N17Rik	10.4196	-0.119995	0.295637	0.246286	0.625051	1.00968	0.0479367	0.454332	0.54031		1.00968	0.010529	0.377366	0.862562
ENSMUSG00000026203	Dnajb2	193.383	-0.0655611	0.115961	0.350981	0.72699	47.5582	-0.0499764	0.327275	0.824648	0.957256	47.5582	0.0920534	0.300834	0.631487	0.905515
ENSMUSG00000026204	Ptprn	18.3822	1.51463	0.536984	7.22248e-05	0.00152996	11.7087	0.120649	0.409044	0.557636	0.860986	11.7087	0.311748	0.486449	0.101503	0.434018
ENSMUSG00000026209	Dnpep	2016.74	0.0338147	0.102556	0.598761	0.881887	1344.36	-0.0175987	0.22842	0.923688	0.981917	1344.36	0.0650478	0.218135	0.718556	0.936808
ENSMUSG00000026208	Des	175.289	1.25296	0.190745	4.98006e-12	4.67683e-10	66.2522	0.205313	0.334301	0.390528	0.771253	66.2522	0.649411	0.447046	0.0225292	0.188952
ENSMUSG00000085653		1.29928	0.108305	0.479552	0.196873
ENSMUSG00000026207	Speg	137.205	1.62928	0.230962	1.20457e-13	1.44329e-11	4.22173	-0.0806431	0.451972	0.466146	0.813756	4.22173	-0.0529664	0.377888	0.483483	0.833727
ENSMUSG00000033021	Gmppa	846.729	0.0593688	0.0982506	0.341099	0.719179	204.193	-0.167866	0.256471	0.425865	0.792291	204.193	-0.0740092	0.236568	0.68864	0.929103
ENSMUSG00000033007		4.34663	-1.65463e-05	0.275531	0.999851	0.999951
ENSMUSG00000032997	Chpf	473.266	-0.0634401	0.116917	0.368546	0.740348	81.6115	-0.361636	0.432911	0.160827	0.539954	81.6115	-0.364944	0.443036	0.102384	0.43613
ENSMUSG00000026211	Obsl1	505.278	0.199719	0.122481	0.0186344	0.129536	32.8255	0.00862237	0.367079	0.970132	0.991946	32.8255	0.00459064	0.324049	0.980633	0.995511
ENSMUSG00000051703	Tmem198	14.5036	-0.0979642	0.254432	0.30659	0.68833	1.53409	0.135191	0.473747	0.242483		1.53409	0.12571	0.405683	0.105806
ENSMUSG00000032968		10.5678	-0.0529064	0.237364	0.549389	0.861952
ENSMUSG00000026213	Stk11ip	674.019	-0.00883553	0.0892885	0.879201	0.972557	240.139	0.102737	0.345316	0.657557	0.905078	240.139	-0.148366	0.328157	0.433217	0.805515
ENSMUSG00000006576	Slc4a3	220.949	1.18967	0.156863	3.75831e-15	5.60819e-13	9.73828	0.353574	0.453115	0.176324	0.563766	9.73828	0.288982	0.414343	0.164531	0.543023
ENSMUSG00000026235	Epha4	9086.8	-0.62211	0.163836	2.55551e-06	8.29875e-05	114.2	-0.74399	0.401725	0.011387	0.114729	114.2	-1.0086	0.424166	0.00134456	0.0272374
ENSMUSG00000099141		13.6095	-0.0850927	0.295538	0.383425	0.753373
ENSMUSG00000101849	Gm28386	13.0885	-0.0453225	0.227767	0.600988	0.882657	1.5953	-0.0602561	0.455806	0.499844		1.5953	0.038483	0.378525	0.530969
ENSMUSG00000004872	Pax3	19.4761	0.643946	0.546706	0.00651574	0.0601324	2.30115	0.0247246	0.447867	0.798295	0.94841	2.30115	-0.0680278	0.388764	0.112046
ENSMUSG00000032908	Sgpp2	51.326	0.0141308	0.140692	0.849623	0.964813	3.22471	0.158437	0.456171	0.345916	0.740842	3.22471	0.0233526	0.362	0.841956	0.966006
ENSMUSG00000026245	Farsb	4088.95	-0.0574619	0.111851	0.401248	0.76714	2147.48	-0.0537151	0.226155	0.782323	0.943677	2147.48	0.0524385	0.215026	0.764047	0.947719
ENSMUSG00000101798	Gm28995	3.56033	0.183995	0.464469	0.135594	0.459209	1.07525	-0.0631361	0.450835	0.536864		1.07525	0.00289901	0.372804	0.970795
ENSMUSG00000104018	RP24-300L5.1	17.9482	0.0266986	0.234968	0.756588	0.939447	11.3251	-0.345905	0.540523	0.125063	0.479422	11.3251	-1.61331	1.14955	0.00463518	0.0679381
ENSMUSG00000090486	BC035947	18.5324	0.0844594	0.235163	0.357567	0.732992	1.77588	-0.00344883	0.447707	0.968113	0.991659	1.77588	0.0253449	0.376933	0.675188
ENSMUSG00000099364	5730419F03Rik	4.09167	0.033829	0.301883	0.710501	0.925085	2.28457	0.113318	0.463737	0.300149	0.702648	2.28457	0.065966	0.381414	0.396668
ENSMUSG00000032883	Acsl3	3386.17	-0.00614039	0.113118	0.928075	0.984433	373.449	-0.371702	0.26643	0.089563	0.4044	373.449	-0.309079	0.259382	0.121241	0.469629
ENSMUSG00000079470	Utp14b	2196.16	0.0937968	0.0984406	0.141644	0.472074	142.298	-0.173413	0.315593	0.450825	0.80489	142.298	-0.262614	0.325023	0.209235	0.603357
ENSMUSG00000099377		1.163	-0.0250099	0.37846	0.76631
ENSMUSG00000054702	Ap1s3	41.5854	0.303007	0.366805	0.0381111	0.209061	4.62107	0.0315489	0.419213	0.853152	0.963931	4.62107	-0.0507836	0.36359	0.671632	0.922231
ENSMUSG00000073643	Wdfy1	2002.17	-0.104251	0.10727	0.13	0.448193	49.6142	-0.0351025	0.273853	0.871012	0.969318	49.6142	-0.0788798	0.258094	0.678342	0.924695
ENSMUSG00000026248	Mrpl44	1106.43	-0.0199848	0.113406	0.769597	0.942937	393.078	0.165628	0.263973	0.446312	0.803039	393.078	0.305798	0.275789	0.139179	0.502405
ENSMUSG00000026249	Serpine2	310.803	1.37789	0.172189	1.01287e-16	1.85233e-14	454.09	0.189413	0.304685	0.416468	0.78836	454.09	1.08022	0.398862	0.000634956	0.0151315
ENSMUSG00000067106	Gm5529	1.28985	0.0542108	0.383716	0.542399		4.00845	0.0558335	0.441097	0.65659	0.904931	4.00845	-0.0218329	0.371016	0.795378	0.954157
ENSMUSG00000099552	9830004L10Rik	5.55079	-0.0886075	0.337184	0.376012	0.747567	9.63121	-0.281608	0.516449	0.153475	0.527295	9.63121	-0.241202	0.458349	0.0971452	0.42327
ENSMUSG00000043230	Fam124b	27.1771	0.32078	0.350935	0.029372	0.176697	4.05828	0.0771049	0.449269	0.512444	0.839103	4.05828	0.0108554	0.371585	0.895501	0.976691
ENSMUSG00000103404	RP24-193D9.2	2.85937	-0.0590477	0.333547	0.532026	0.852302	1.70371	0.141727	0.48124	0.147052	0.517074	1.70371	0.083269	0.389552	0.22553
ENSMUSG00000004364	Cul3	4798.15	-0.0323539	0.0781804	0.528152	0.849901	512.973	-0.515519	0.24094	0.0130544	0.124503	512.973	-0.484	0.242679	0.0150454	0.146785
ENSMUSG00000103076	RP24-193D9.4	58.2939	-0.174667	0.215476	0.0882224	0.35637	4.99837	-0.0388904	0.436453	0.762232	0.937936	4.99837	-0.13732	0.409421	0.0863178	0.39837
ENSMUSG00000103525	RP24-193D9.3	19.4282	0.00242638	0.198519	0.976231	0.9948	4.78894	-0.145031	0.471533	0.249107	0.652064	4.78894	-0.117628	0.398438	0.168526	0.549312
ENSMUSG00000101722		1.59253	0.19178	0.534067	0.0992883
ENSMUSG00000038608	Dock10	19.7048	0.725967	0.546435	0.00407626	0.0421543	3.46169	0.0402987	0.438122	0.758669	0.936728	3.46169	-0.0629234	0.378334	0.463134	0.821562
ENSMUSG00000055980	Irs1	74.2225	0.668761	0.284704	0.000367637	0.00607062	1.19546	0.0288413	0.448072	0.755769		1.19546	0.0291872	0.37696	0.651941
ENSMUSG00000026142	Rhbdd1	951.469	-0.207949	0.123435	0.0157051	0.115336	38.1315	-0.0591457	0.33965	0.79208	0.946534	38.1315	-0.0952199	0.313168	0.604674	0.893547
ENSMUSG00000104493	RP23-430H22.1	15.7961	-0.0404034	0.220734	0.636527	0.897784	1.29173	0.0415172	0.44426	0.722763		1.29173	-0.0976527	0.396334	0.123296
ENSMUSG00000100786	Gm28940	24.6196	0.593484	0.527047	0.00810345	0.0708229	15.0887	2.43686	0.808404	0.000150718	0.00408404	15.0887	0.763998	1.0299	0.0209453	0.180688
ENSMUSG00000096779	Gm22112	3.09267	0.0115431	0.28857	0.897266	0.97757	0.793538	0.0730435	0.461659	0.327546		0.793538	0.0200094	0.379247	0.92264
ENSMUSG00000067158	Col4a4	11.9549	-0.0243295	0.234371	0.777135	0.944414	1.84548	0.0402907	0.44619	0.688892	0.914964	1.84548	0.0285325	0.375294	0.678353
ENSMUSG00000079465		2.29151	0.00270069	0.361605	0.974833	0.994459
ENSMUSG00000097564		6.80577	-0.128335	0.362048	0.24031	0.618329
ENSMUSG00000026150	Mff	2425.01	-0.134732	0.108664	0.0630015	0.290541	720.442	-0.100141	0.244014	0.62834	0.892929	720.442	0.079582	0.229987	0.663935	0.919148
ENSMUSG00000101450	Gm28941	39.5353	-0.204254	0.259791	0.0723662	0.316407	2.71565	-0.0657022	0.450845	0.528849	0.846318	2.71565	0.0626006	0.379861	0.424583
ENSMUSG00000026149		12.656	-0.0479562	0.243521	0.588063	0.878818
ENSMUSG00000100170	Gm28942	2.57681	0.0652215	0.358131	0.490675	0.828849	1.27931	-0.087246	0.461558	0.321083		1.27931	0.0222145	0.374862	0.757462
ENSMUSG00000100744		1.53552	-0.147667	0.505509	0.136833
ENSMUSG00000026159	Agfg1	4806.05	0.0130198	0.0748998	0.794525	0.948614	517.916	-0.01682	0.208102	0.92555	0.982189	517.916	-0.0476769	0.19999	0.775825	0.950797
ENSMUSG00000113880		3.81108	0.218157	0.543972	0.086647	0.352604	3.45959	0.283862	0.577279	0.0262813	0.196912	3.45959	0.0897595	0.386312	0.265542	0.671422
ENSMUSG00000038496	Slc19a3	107.054	0.0571052	0.134656	0.448194	0.802506	39.7992	3.02884	0.582595	9.02787e-09	8.59281e-07	39.7992	2.7721	0.5887	1.07137e-07	9.86193e-06
ENSMUSG00000100432	Gm7539	1.203	0.018988	0.381834	0.818312		1.8873	0.0960984	0.469912	0.0913494	0.409164	1.8873	0.0519775	0.384473	0.359484
ENSMUSG00000026163	Sphkap	3.26562	0.823006	1.08591	0.00187228	0.0229881	1.5226	-0.00642859	0.450404	0.905746		1.5226	-0.0449683	0.384113	0.209207
ENSMUSG00000100580	4933436I20Rik	6.52131	0.234488	0.444609	0.0897226	0.360109	2.48445	-0.013758	0.444057	0.892234	0.97431	2.48445	0.0434561	0.37689	0.550165
ENSMUSG00000045658	Pid1	402.032	-0.126326	0.120725	0.0977049	0.379386	178.999	-0.0163916	0.267484	0.936568	0.984688	178.999	0.689465	0.337193	0.00718944	0.0915234
ENSMUSG00000102750	RP23-81L22.3	5.18194	-0.00980029	0.315238	0.912892	0.980607	1.53158	0.0260362	0.448213	0.7683		1.53158	0.0296809	0.377217	0.642696
ENSMUSG00000101934		1.78717	0.0515095	0.398022	0.545874
ENSMUSG00000036766	Dner	40.7005	-0.0916541	0.194858	0.29726	0.678133	21.7776	-0.113696	0.354103	0.615657	0.88874	21.7776	-0.567314	0.565318	0.0387123	0.257258
ENSMUSG00000026219	Trip12	26725.2	0.0472709	0.0891429	0.410591	0.775252	2474.59	0.111678	0.247905	0.593158	0.877872	2474.59	-0.14985	0.240749	0.419865	0.798138
ENSMUSG00000103505	RP23-447L15.2	31.3229	0.00885606	0.202157	0.913915	0.980618	10.9722	0.305531	0.525391	0.147982	0.5181	10.9722	0.138172	0.383862	0.314915	0.717962
ENSMUSG00000104503	RP23-447L15.3	75.6585	-0.0440584	0.209278	0.60207	0.882907	42.3736	-0.152815	0.375773	0.501093	0.832152	42.3736	-0.0982177	0.329023	0.576923	0.881217
ENSMUSG00000073633	Fbxo36	69.9752	-0.0237216	0.13625	0.748596	0.936522	64.0069	-0.0656716	0.29866	0.770413	0.940509	64.0069	-0.0116452	0.272404	0.950491	0.988325
ENSMUSG00000026220	Slc16a14	54.1532	1.38905	0.316488	6.65211e-07	2.44041e-05	42.5667	0.88092	0.52746	0.0123129	0.12003	42.5667	0.148307	0.324734	0.443962	0.810755
ENSMUSG00000099693	Gm29284	1.99028	0.143474	0.471033	0.177056	0.533227	3.20799	4.60367	2.79532	0.00191817	0.0318617	3.20799	5.43722	2.7542	0.000492049	0.0125852
ENSMUSG00000052477	C130026I21Rik	4.07557	0.680811	0.918714	0.00626947	0.0584934	23.1135	3.77093	1.06501	1.7169e-05	0.000651698	23.1135	3.98228	1.05909	7.06857e-06	0.000388261
ENSMUSG00000064281	Rpl19-ps1	5.30638	-0.243705	0.530367	0.0805519	0.338333	1.57624	0.126491	0.461816	0.33552		1.57624	-0.000624668	0.370319	0.996583
ENSMUSG00000089844	A530032D15Rik	4.7715	-0.0760295	0.307926	0.432715	0.792815	6.09657	3.19101	1.35818	0.000913442	0.0177999	6.09657	2.27737	1.61843	0.00474304	0.0687683
ENSMUSG00000072109	A530040E14Rik	29.623	3.38601	0.513518	1.65687e-13	1.92823e-11	39.4462	4.48712	0.829384	1.25316e-08	1.10916e-06	39.4462	3.48666	0.852108	4.67847e-06	0.000264792
ENSMUSG00000089716	Gm6264	11.8161	0.898876	0.74894	0.00352813	0.0377872	5.32395	0.259023	0.519003	0.147958	0.5181	5.32395	0.242079	0.471163	0.0748931	0.371758
ENSMUSG00000079455	Gm16026	21.3863	3.16868	0.539566	2.2831e-11	1.96226e-09	112.817	6.54912	1.09034	3.34494e-10	4.49337e-08	112.817	6.55741	1.0904	3.18233e-10	6.12799e-08
ENSMUSG00000070034	Sp110	31.281	2.59925	0.396633	1.15069e-12	1.19099e-10	128.969	4.5849	1.07124	9.59216e-07	5.28154e-05	128.969	4.44695	1.07593	1.74499e-06	0.000116469
ENSMUSG00000070031	Sp140	20.332	1.73667	0.497407	1.09198e-05	0.000300796	19.312	3.01096	0.838154	2.45326e-05	0.000883409	19.312	3.07445	0.838142	1.74372e-05	0.000825212
ENSMUSG00000073628	Gm10552	1.76671	0.0760686	0.406172	0.404753		3.44821	2.66291	1.65806	0.00412917	0.0552334	3.44821	3.06583	1.5777	0.00197149	0.036136
ENSMUSG00000026222	Sp100	29.6302	-0.0375717	0.177525	0.64008	0.899144	53.5625	-0.23256	0.456418	0.273536	0.678947	53.5625	-0.00428884	0.341569	0.975095	0.99487
ENSMUSG00000052760	A630001G21Rik	43.5498	0.0613888	0.160329	0.443452	0.799561	7.11668	0.373923	0.558063	0.11613	0.46347	7.11668	0.240906	0.437572	0.143271	0.508072
ENSMUSG00000036707	Cab39	3611.74	9.51097e-05	0.103464	0.998825	0.999607	2660.44	2.64969	0.472982	1.4507e-09	1.6259e-07	2660.44	1.75761	0.486371	1.92206e-05	0.000892952
ENSMUSG00000026223	Itm2c	905.371	0.184812	0.184053	0.0606787	0.283716	101.598	-0.431331	0.427271	0.108191	0.447712	101.598	-0.283424	0.37084	0.179314	0.564609
ENSMUSG00000049608	Gpr55	2.54602	0.52706	0.888405	0.00676622	0.0616385	0.893545	0.0551422	0.456039	0.481593		0.893545	0.000311817	0.377541	0.980924
ENSMUSG00000099342	Gm18180	58.17	-0.120859	0.193215	0.186761	0.547235	6.74426	0.241868	0.462535	0.255981	0.661465	6.74426	0.138327	0.372684	0.375485	0.765193
ENSMUSG00000026226	Spata3	2.09476	0.000152314	0.319678	0.998639	0.999607	0.686265	0.0535953	0.457087	0.479015		0.686265	0.0294785	0.380034	0.621703
ENSMUSG00000026227	2810459M11Rik	7.96968	0.0225676	0.237922	0.793536	0.948346	1.70628	0.0353891	0.448751	0.698177	0.91771	1.70628	0.032111	0.377533	0.608268
ENSMUSG00000026229	Psmd1	6738.92	-0.0160171	0.0727222	0.741423	0.935403	2659.49	0.113471	0.256319	0.586351	0.875701	2659.49	0.305162	0.27135	0.134524	0.494553
ENSMUSG00000077274	Gm22786	4.4367	-0.0432634	0.29544	0.637787	0.898229	2.97364	-0.0512566	0.440976	0.675574	0.911451	2.97364	-0.0861887	0.385829	0.283818	0.688404
ENSMUSG00000026228	Htr2b	38.9486	0.0116157	0.191007	0.885554	0.974101	13.4245	-0.186028	0.370451	0.427823	0.792818	13.4245	-0.261752	0.382148	0.201096	0.593335
ENSMUSG00000103272	RP24-308M3.2	37.3382	-0.048436	0.192844	0.559364	0.86576	8.78956	0.306845	0.514682	0.159544	0.537803	8.78956	-0.141213	0.387668	0.285104	0.68873
ENSMUSG00000062590	Armc9	580.875	-0.0358119	0.0867828	0.525015	0.848369	122.339	0.376313	0.289984	0.10539	0.441536	122.339	0.391373	0.294417	0.0720735	0.363689
ENSMUSG00000079445	B3gnt7	227.068	-1.01523	0.16391	8.25736e-11	6.60671e-09	181.899	-0.854103	0.343345	0.00217395	0.0346315	181.899	-0.503155	0.328996	0.0329485	0.235791
ENSMUSG00000026234	Ncl	8794.65	0.00610462	0.197312	0.940166	0.98697	7734.13	-0.192758	0.2398	0.342838	0.737418	7734.13	-0.137244	0.22713	0.477524	0.831266
ENSMUSG00000104627		1.26277	-0.018481	0.377394	0.825021
ENSMUSG00000064823	Snord82	6.60615	0.0261753	0.264315	0.767985	0.942673	14.8656	0.00638876	0.448481			14.8656	0.0127374	0.376593
ENSMUSG00000073627	C130036L24Rik	152.65	-0.0610561	0.122306	0.398002	0.764675	18.2405	0.429226	0.489442	0.119928	0.47079	18.2405	-0.0202916	0.322789	0.905524	0.979104
ENSMUSG00000036574	1700019O17Rik	2.70235	-0.0369919	0.346812	0.682088	0.915542	1.42218	0.0384744	0.449168	0.578935		1.42218	0.0650287	0.383452	0.253658
ENSMUSG00000026238	Ptma	24686.9	-0.112877	0.155148	0.180974	0.539175	10322.7	-0.203955	0.253902	0.332759	0.729289	10322.7	-0.0213354	0.230139	0.949689	0.988084
ENSMUSG00000026239	Pde6d	221.14	-0.179652	0.192591	0.0706815	0.311842	134.602	-0.029949	0.261248	0.886343	0.974094	134.602	0.056029	0.245069	0.768137	0.948655
ENSMUSG00000102927	RP23-11K8.3	18.1707	0.0888299	0.300751	0.367579	0.739698	1.16315	-0.0272581	0.451732	0.612274		1.16315	-0.0315388	0.380272	0.366981
ENSMUSG00000026240	Cops7b	661.307	-0.227565	0.156197	0.0196814	0.134848	636.586	0.124793	0.276139	0.574406	0.870706	636.586	0.0126138	0.2527	0.949415	0.988034
ENSMUSG00000103609		2.51871	0.0920572	0.399707	0.346395	0.723477
ENSMUSG00000026241	Nppc	5.2254	0.787274	1.00881	0.00347629	0.0373636	2.25431	-0.00220293	0.44291	0.985799	0.996846	2.25431	0.0831005	0.386167	0.269254
ENSMUSG00000053333	Dis3l2	862.762	-0.0227464	0.0829618	0.676445	0.912567	169.601	-0.139916	0.264835	0.514728	0.840253	169.601	0.00825093	0.242252	0.970675	0.993539
ENSMUSG00000100225		6.37743	-0.34712	0.555646	0.0420417	0.224019
ENSMUSG00000100768	Gm29055	10.423	-0.0281214	0.239472	0.74557	0.936522	6.58923	0.125252	0.449597	0.408357	0.784616	6.58923	0.0495237	0.368386	0.638422	0.90796
ENSMUSG00000104121	RP23-26I10.1	5.75988	0.121937	0.368784	0.258362	0.638106	11.5485	0.174056	0.446289	0.360327	0.748777	11.5485	-0.0637364	0.361654	0.615092	0.897663
ENSMUSG00000102383	RP23-26I10.2	6.97812	0.00631266	0.256897	0.942446	0.987389	5.02587	0.202637	0.489703	0.192953	0.586203	5.02587	0.0358132	0.367753	0.724243	0.937651
ENSMUSG00000104400	RP23-26I10.3	10.0741	-0.05309	0.258778	0.557391	0.865048	1.90968	-0.0108457	0.44289	0.917273	0.981387	1.90968	-0.0285899	0.374978	0.703974
ENSMUSG00000102293	RP23-26I10.4	2.38152	-0.0162049	0.347291	0.853952	0.965808	1.26383	-0.057306	0.459233	0.308437		1.26383	-0.0464051	0.384471	0.161847
ENSMUSG00000102649	RP23-26I10.5	5.66935	0.00574717	0.25606	0.947549	0.988288	1.89875	-0.108041	0.466524	0.221784	0.620511	1.89875	-0.046455	0.378127	0.516243
ENSMUSG00000084106	Gm6136	84.5946	-0.0406895	0.15513	0.600926	0.882657	677.475	0.429775	0.430567	0.11314	0.457123	677.475	0.294205	0.378712	0.174984	0.558914
ENSMUSG00000102571	RP23-26I10.6	2.22845	0.0276945	0.362317	0.751136	0.93759	1.49417	-0.0430461	0.447322	0.665135		1.49417	-0.0756955	0.38754	0.253189
ENSMUSG00000099401	Gm28375	4.43811	-0.0239682	0.291617	0.79021	0.947518	1.33985	0.127198	0.478529	0.141133		1.33985	0.0904731	0.394659	0.118155
ENSMUSG00000103984	RP24-286D13.3	13.4757	-0.0501428	0.243652	0.572098	0.872214	6.19031	0.0451426	0.423639	0.780603	0.943368	6.19031	-0.0584786	0.366707	0.613559	0.896979
ENSMUSG00000026246	Alppl2	19.189	1.83292	0.586979	2.44071e-05	0.000613279	36.3968	6.91701	1.1501	2.23758e-12	4.60674e-10	36.3968	6.60006	1.15279	1.83592e-11	4.80581e-09
ENSMUSG00000036500		3.651	0.495328	0.818591	0.0123128	0.0955289
ENSMUSG00000026247	Ecel1	55.7134	1.59613	0.28227	1.0254e-09	6.96149e-08	7.91466	-0.0255457	0.414057	0.881632	0.972798	7.91466	0.104814	0.370821	0.441984	0.810405
ENSMUSG00000036480	Prss56	18.9267	0.0415353	0.201771	0.618634	0.889346	2.42084	0.217714	0.523318	0.0619524	0.331293	2.42084	0.137158	0.411021	0.0906437
ENSMUSG00000026251	Chrnd	14.6982	0.0464227	0.217253	0.587568	0.878735	1.33575	0.00765731	0.445608	0.948725		1.33575	-0.0801169	0.391263	0.138637
ENSMUSG00000026253	Chrng	12.7829	-0.054297	0.250903	0.545758	0.86008	1.14887	0.0905045	0.468057	0.131936		1.14887	0.0194682	0.380049	0.864743
ENSMUSG00000026254	Eif4e2	3429.11	-0.208322	0.13415	0.0199041	0.135915	1693.37	-0.126472	0.229362	0.52069	0.844024	1693.37	-0.0389242	0.215425	0.823738	0.961961
ENSMUSG00000026255	Efhd1	34.1593	-0.0290098	0.176602	0.715949	0.926729	58.9454	3.37953	0.59913	1.79271e-09	1.96276e-07	58.9454	3.56025	0.596874	2.78831e-10	5.43169e-08
ENSMUSG00000048000	Gigyf2	3832.91	-0.0872067	0.10872	0.201873	0.570338	356.439	0.349472	0.313179	0.147735	0.517846	356.439	0.0925081	0.263408	0.632542	0.905879
ENSMUSG00000095281	Gm22549	7.83287	0.0832679	0.294065	0.391812	0.760384	1.33672	0.161491	0.48437	0.178761		1.33672	0.0510437	0.377362	0.57096
ENSMUSG00000079436	Kcnj13	32.0879	-0.0301461	0.174883	0.70485	0.923089	2.36031	0.000373002	0.427482	0.999685	0.999877	2.36031	-0.0196872	0.365278	0.848132
ENSMUSG00000089613	Gm23504	6.84312	-0.105934	0.304862	0.298063	0.678732	4.20552	0.0961157	0.418952	0.609206	0.886931	4.20552	-0.0473414	0.357875	0.716473	0.93649
ENSMUSG00000026259	Ngef	16.9908	1.17908	0.67171	0.0008685	0.0123607	4.78003	0.224396	0.504505	0.166136	0.547882	4.78003	0.0790825	0.375895	0.470654	0.826162
ENSMUSG00000026288	Inpp5d	5527.97	-0.117074	0.0976127	0.0743786	0.321391	675.411	0.422669	0.353344	0.10236	0.435296	675.411	0.0904558	0.277671	0.639658	0.907986
ENSMUSG00000026289	Atg16l1	2154.66	0.0302336	0.0840606	0.582026	0.87639	354.476	-0.00137634	0.270523	0.991128	0.99766	354.476	0.0975516	0.25679	0.611054	0.896182
ENSMUSG00000087968	Gm25395	184.419	-0.504936	0.355287	0.00502296	0.0497449	2.95106	-0.119731	0.460855	0.332454	0.729241	2.95106	-0.053674	0.374577	0.559843	0.871497
ENSMUSG00000089281		208.222	-0.517126	0.324773	0.00320507	0.0351474
ENSMUSG00000056055	Sag	21.2086	0.0422104	0.190161	0.607391	0.88531	4.88337	0.130465	0.427608	0.485905	0.824895	4.88337	0.0457378	0.355593	0.729239	0.938898
ENSMUSG00000070738	Dgkd	2834.01	0.245864	0.130811	0.00768759	0.0680937	131.844	0.34029	0.297897	0.148016	0.518123	131.844	0.217354	0.273039	0.281588	0.686485
ENSMUSG00000101942		4.63699	0.183988	0.469722	0.134389	0.456975
ENSMUSG00000103996	RP23-473M13.2	4.13872	0.0862452	0.327216	0.385674	0.755659	16.9058	-0.114107	0.415293	0.557317	0.860882	16.9058	-0.112264	0.367001	0.439008	0.808466
ENSMUSG00000103591	RP24-398O5.2	14.154	0.020881	0.255218	0.811884	0.953162	6.38133	-0.208778	0.48489	0.223129	0.621913	6.38133	-0.0351257	0.361408	0.76335	0.947719
ENSMUSG00000005501	Usp40	1041.8	0.00441157	0.0864858	0.937994	0.986663	118.426	0.237888	0.207091	0.196973	0.591989	118.426	-0.0257274	0.19404	0.876435	0.973217
ENSMUSG00000081984	Dnajb3	23.2622	0.221448	0.35475	0.0853901	0.349847	10.5223	0.116781	0.416022	0.552395	0.857614	10.5223	0.119777	0.367735	0.428497	0.803069
ENSMUSG00000079429	Mroh2a	185.703	0.0754111	0.146931	0.340748	0.718976	9.24113	0.104233	0.424838	0.56146	0.86348	9.24113	0.167951	0.399487	0.234913	0.636502
ENSMUSG00000044783	Hjurp	5217.41	-0.158086	0.108364	0.0352152	0.198152	411.932	0.038414	0.242329	0.856519	0.964302	411.932	0.0690044	0.230343	0.708916	0.934722
ENSMUSG00000099553		4.19377	0.0559906	0.312924	0.551382	0.862368
ENSMUSG00000100908		8.90602	0.0340344	0.242503	0.696739	0.920121
ENSMUSG00000049866	Arl4c	135.327	1.01947	0.21249	1.4123e-07	6.10148e-06	5.71202	-0.115719	0.453239	0.397701	0.775703	5.71202	-0.0265495	0.366924	0.791136	0.953929
ENSMUSG00000097398	2410088K16Rik	18.4996	2.23061	0.516565	3.50906e-07	1.36561e-05	8.11137	-0.282245	0.479567	0.201363	0.597756	8.11137	-1.05251	1.27698	0.0117381	0.123834
ENSMUSG00000099378		1.67353	0.00539884	0.34344	0.951035
ENSMUSG00000036206	Sh3bp4	1806.96	0.136682	0.103234	0.0522424	0.258803	177.842	-0.478713	0.437903	0.0831978	0.388045	177.842	-0.0564148	0.299382	0.760057	0.945884
ENSMUSG00000102700	RP24-396E16.1	80.7986	-0.81355	0.303121	0.000152445	0.00286991	18.9808	-0.20194	0.447703	0.313328	0.713911	18.9808	-0.26598	0.465073	0.102109	0.43566
ENSMUSG00000055013	Agap1	1355.7	0.0309092	0.122042	0.663436	0.908125	76.9906	0.0111648	0.335065	0.963343	0.991116	76.9906	-0.182213	0.335545	0.350574	0.746577
ENSMUSG00000104114	RP23-102K8.1	6.87924	0.00649704	0.290009	0.942017	0.987389	9.70914	-0.104663	0.420829	0.568889	0.867844	9.70914	-0.139228	0.384602	0.310056	0.712143
ENSMUSG00000101662		2.17276	0.00467637	0.339177	0.957754	0.990663
ENSMUSG00000102009	4933400F21Rik	17.9682	0.0306664	0.212606	0.714859	0.926455	7.8071	-0.196795	0.452131	0.321966	0.719568	7.8071	-0.184834	0.40695	0.212904	0.607423
ENSMUSG00000088775		1.22961	0.00236328	0.367516	0.977718
ENSMUSG00000103252	RP24-78E16.3	6.29514	0.0125978	0.269446	0.886777	0.974433	0.342754	-0.0140837	0.453554	0.878256		0.342754	0.0122447	0.378981	0.83132
ENSMUSG00000034486	Gbx2	21.7116	-0.226234	0.315617	0.0705824	0.311631	42.1172	-0.46446	0.670347	0.0624128	0.332821	42.1172	-0.34282	0.556046	0.0528574	0.307579
ENSMUSG00000092627	D130058E05Rik	16.2261	-0.171172	0.316699	0.136474	0.460778	6.83156	0.056533	0.403335	0.774406	0.942009	6.83156	0.00975257	0.346668	0.948228	0.987791
ENSMUSG00000067081	Asb18	3.2065	0.0303833	0.325019	0.737675	0.933737	0.635364	0.00660039	0.451381	0.837761		0.635364	-0.00225711	0.377994	0.92961
ENSMUSG00000026301	Iqca	10.6723	0.528782	0.585032	0.0145294	0.108838	5.03289	-0.451347	0.85139	0.00766314	0.0868107	5.03289	-0.109887	0.387641	0.295123	0.698328
ENSMUSG00000044337	Ackr3	91.626	-0.0584602	0.136492	0.440457	0.79812	194.651	-0.985732	0.395519	0.00152713	0.0266757	194.651	-0.958555	0.404583	0.00159315	0.0308199
ENSMUSG00000101028	Gm28723	3.21951	-0.0105763	0.338307	0.904905	0.978881	1.85599	-0.0258893	0.443469	0.798258	0.94841	1.85599	-0.089584	0.391219	0.204739
ENSMUSG00000103292	RP24-393L8.1	25.3732	-1.17509	0.460946	0.000182662	0.00332935	4.79966	-0.213501	0.455714	0.302335	0.704025	4.79966	-0.135019	0.376949	0.357677	0.750258
ENSMUSG00000034432	Cops8	1637.21	-0.0177148	0.0947151	0.770561	0.942937	997.719	-0.0707926	0.202227	0.69243	0.91645	997.719	0.0540035	0.193919	0.747005	0.943121
ENSMUSG00000048126	Col6a3	4.9875	0.553356	0.804897	0.0124978	0.0965338	1.68933	0.0675337	0.452038	0.488679	0.826508	1.68933	-0.0161896	0.37523	0.823286
ENSMUSG00000026303	Mlph	22.3947	1.40158	0.546385	0.000140759	0.00267684	0.862952	0.0909168	0.467498	0.185658		0.862952	0.0397028	0.381935	0.612965
ENSMUSG00000026304	Rab17	53.8743	0.102251	0.196739	0.253483	0.633395	33.7184	-0.780448	0.678063	0.0257262	0.194523	33.7184	0.0216833	0.320837	0.902247	0.97872
ENSMUSG00000026305	Lrrfip1	597.26	1.21196	0.151246	1.20076e-16	2.16342e-14	55.2252	-0.104119	0.306667	0.647468	0.901675	55.2252	-0.0272381	0.276468	0.884632	0.973606
ENSMUSG00000070732	Rbm44	236.446	1.03623	0.1711	1.86775e-10	1.42411e-08	9.41182	-0.25209	0.489585	0.204804	0.602276	9.41182	-0.0855288	0.36325	0.52526	0.854009
ENSMUSG00000034343	Ube2f	651.12	-0.0870823	0.100959	0.177989	0.534868	441.086	0.00654719	0.266702	0.978073	0.99394	441.086	0.0747316	0.251495	0.6956	0.930931
ENSMUSG00000083064	Gm7785	22.1127	0.0471345	0.188702	0.567201	0.869678	3.31531	0.136905	0.438117	0.457515	0.807903	3.31531	-0.0295569	0.360444	0.805286	0.955847
ENSMUSG00000026307	Scly	523.004	-0.0201174	0.109416	0.76352	0.941331	26.388	0.183376	0.328208	0.435286	0.797894	26.388	0.0442159	0.286333	0.817488	0.960214
ENSMUSG00000090322		5.45497	-0.0342701	0.275417	0.703497	0.922613
ENSMUSG00000049515		16.9327	0.573121	0.535014	0.00950169	0.0796984
ENSMUSG00000026308	Klhl30	2.16698	0.2108	0.568647	0.0732695	0.31858	1.19424	0.0714188	0.459547	0.352265		1.19424	0.00666916	0.377008	0.918267
ENSMUSG00000047443	Fam132b	59.6882	0.180483	0.245238	0.093928	0.370097	7.56296	0.245839	0.505203	0.174343	0.560532	7.56296	0.0527807	0.365681	0.644787	0.909776
ENSMUSG00000026309	Ilkap	1118.61	-0.260767	0.131474	0.00543345	0.0527156	246.987	-0.185114	0.243526	0.367048	0.754614	246.987	0.0672828	0.224304	0.710755	0.935113
ENSMUSG00000067071	Hes6	312.834	0.0593819	0.136242	0.433313	0.793515	69.4036	-0.126914	0.36424	0.577396	0.872683	69.4036	-0.0238606	0.313835	0.891178	0.974757
ENSMUSG00000055866	Per2	5.7022	0.174609	0.398665	0.150741	0.487692	2.60069	0.371742	0.668451	0.0350342	0.234814	2.60069	0.0767675	0.378651	0.449267
ENSMUSG00000034292	Traf3ip1	421.021	0.0207032	0.11362	0.761828	0.941206	54.1247	-0.206821	0.370653	0.384016	0.76784	54.1247	-0.233063	0.361776	0.248068	0.650983
ENSMUSG00000026311	Asb1	568.627	-0.152194	0.121812	0.0551726	0.267735	67.5674	-0.11866	0.293847	0.59684	0.879437	67.5674	-0.341002	0.33131	0.120735	0.468753
ENSMUSG00000101705		1.82282	0.0993492	0.436542	0.288941
ENSMUSG00000102745		3.76952	-0.0436347	0.303257	0.635971	0.897694
ENSMUSG00000026313	Hdac4	1244.81	-0.047366	0.118324	0.501277	0.834979	217.43	-0.295141	0.34099	0.22598	0.625409	217.43	-0.39292	0.370445	0.0895932	0.405773
ENSMUSG00000103101	RP23-309A8.4	57.4531	-0.0411286	0.177788	0.610003	0.885815	3.56916	0.125747	0.447836	0.41838	0.79028	3.56916	0.0415036	0.36668	0.695596	0.930931
ENSMUSG00000102565		20.8499	-0.00901566	0.19492	0.911482	0.980228
ENSMUSG00000026260	Ndufa10	3524.59	-0.0437001	0.114134	0.526063	0.848943	1548.77	0.0463518	0.223458	0.815747	0.953716	1548.77	0.135197	0.217913	0.453631	0.816292
ENSMUSG00000061616	Olfr12	1.90781	-0.138435	0.488599	0.163012		0.932043	0.0455942	0.452556	0.613439		0.932043	0.0273944	0.378283	0.665723
ENSMUSG00000073616	Myeov2	777.73	0.0130528	0.128151	0.856401	0.96665	731.937	0.137946	0.290779	0.544891	0.85444	731.937	0.0329863	0.263297	0.862053	0.970954
ENSMUSG00000044055	Otos	3.30729	0.0141146	0.321756	0.87482	0.971795	0.70233	0.060175	0.456465	0.509477		0.70233	0.0320303	0.379431	0.630992
ENSMUSG00000100781		2.85389	0.0188496	0.332042	0.833036	0.959719
ENSMUSG00000034220	Gpc1	546.941	0.11812	0.108032	0.0935864	0.369191	20.3996	-0.0282837	0.356455	0.896636	0.974821	20.3996	-0.112736	0.333061	0.524251	0.854009
ENSMUSG00000101995		9.77097	0.0233631	0.261796	0.791516	0.947536
ENSMUSG00000034212	Ankmy1	47.625	-0.00874344	0.159424	0.909595	0.979898	0.937057	0.0570693	0.454142	0.415716		0.937057	-0.0105642	0.377098	0.997746
ENSMUSG00000047067	Dusp28	133.258	0.0888127	0.137948	0.256945	0.636987	42.4471	0.484217	0.352492	0.0650017	0.340747	42.4471	0.469737	0.359347	0.0526371	0.307044
ENSMUSG00000097251	5033417F24Rik	24.3021	0.0195465	0.172807	0.80423	0.950962	1.06033	0.0169595	0.451013	0.827313		1.06033	-0.0379027	0.382824	0.374581
ENSMUSG00000026269	Rnpepl1	525.427	-0.0163425	0.131761	0.822752	0.956464	94.506	-0.373949	0.384002	0.147745	0.517846	94.506	-0.109788	0.298873	0.566311	0.87501
ENSMUSG00000100632	9430060I03Rik	21.1501	-0.025466	0.188995	0.753123	0.938289	3.20674	0.0596651	0.421634	0.723114	0.926213	3.20674	0.0305311	0.358185	0.809033	0.957049
ENSMUSG00000026270	Capn10	728.405	-0.0307376	0.115541	0.656426	0.905272	97.4367	-0.0632825	0.302827	0.779016	0.943019	97.4367	0.179975	0.297624	0.371544	0.761676
ENSMUSG00000026271	Gpr35	15.1927	0.269134	0.433084	0.0650897	0.296364	3.20655	0.00443911	0.429002	0.977185	0.993886	3.20655	-0.0362066	0.366819	0.733315	0.939592
ENSMUSG00000014602	Kif1a	616.714	1.07607	0.178758	2.21511e-10	1.67844e-08	6.05338	3.69795	1.42617	0.000442701	0.00994278	6.05338	0.629129	2.86465	0.00528324	0.0743232
ENSMUSG00000034159		2.99838	0.0222195	0.337688	0.803544	0.950747
ENSMUSG00000084989	E030010N08Rik	39.2757	0.214905	0.266917	0.0649998	0.296364	1.18724	0.0430343	0.451901	0.512885		1.18724	0.0264963	0.378063	0.549447
ENSMUSG00000047793	Sned1	252.98	0.386721	0.252236	0.0055478	0.0535685	4.64423	0.056913	0.430985	0.7049	0.92029	4.64423	-0.0769377	0.37661	0.438501	0.808459
ENSMUSG00000026273	Mterf4	775.323	-0.0262266	0.108091	0.693026	0.91889	170.294	0.362313	0.25276	0.0907232	0.407684	170.294	0.162489	0.229892	0.382689	0.770482
ENSMUSG00000101172	Gm28535	5.80821	0.0321526	0.255949	0.716178	0.92682	0.795991	0.0454062	0.449594	0.714162		0.795991	0.0734531	0.385754	0.318525
ENSMUSG00000100351	Gm7867	7.39029	0.036461	0.250787	0.67961	0.91438	1.40422	-0.0954622	0.464927	0.287876		1.40422	0.0208662	0.375267	0.757797
ENSMUSG00000026274	Pask	1823.85	-0.00419075	0.0681873	0.927359	0.984234	151.838	0.0708803	0.277279	0.748124	0.934836	151.838	0.194304	0.276299	0.330665	0.730629
ENSMUSG00000026275	Ppp1r7	1782.53	-0.0285294	0.121164	0.686659	0.917129	397.507	0.0383009	0.192752	0.827537	0.958214	397.507	0.292746	0.198907	0.0873603	0.401329
ENSMUSG00000098689		2.60349	0.00477997	0.330096	0.957124	0.990629
ENSMUSG00000064389	Gm26446	1.91828	0.0454318	0.342158	0.621057		0.625556	0.0304019	0.451508	0.743306		0.625556	0.0110496	0.377515	0.863513
ENSMUSG00000034107	Ano7	13.7303	0.142876	0.28914	0.181274	0.539476	5.56356	0.26424	0.529995	0.126903	0.482471	5.56356	0.214839	0.450855	0.0872319	0.401262
ENSMUSG00000034088	Hdlbp	9224.47	0.0382548	0.119918	0.58811	0.878818	847.959	-0.0297326	0.248082	0.888447	0.974094	847.959	-0.00820156	0.233378	0.965116	0.992059
ENSMUSG00000090489	Gm17415	34.5625	0.0744308	0.183214	0.377928	0.748838	5.82085	0.182916	0.504974	0.0282194	0.205658	5.82085	0.14629	0.421592	0.00620627	0.0825728
ENSMUSG00000026276	Sept2	203.008	-0.126069	0.174551	0.158367	0.501316	20.3863	0.247274	0.407221	0.305221	0.706834	20.3863	-0.0467646	0.32492	0.783819	0.951923
ENSMUSG00000034066	Farp2	130.88	0.00987003	0.143814	0.895217	0.976856	21.5065	2.41147	0.999604	0.000687659	0.0142056	21.5065	2.04672	1.07189	0.00187207	0.0348864
ENSMUSG00000103854		2.26982	-0.145836	0.47764	0.16889	0.519004
ENSMUSG00000026277	Stk25	2239.22	-0.066826	0.110734	0.327893	0.706282	512.465	0.713553	0.222578	0.000381344	0.00889536	512.465	0.903582	0.225992	9.32936e-06	0.000491493
ENSMUSG00000100927		3.06921	-0.113056	0.375443	0.284373	0.665088
ENSMUSG00000026278	Bok	159.895	0.137372	0.169105	0.126109	0.44073	124.925	1.65205	0.461241	2.49126e-05	0.000890321	124.925	2.23413	0.453669	4.77204e-08	4.96559e-06
ENSMUSG00000026279	Thap4	394.199	-0.360287	0.156564	0.00103754	0.0142657	184.115	0.691856	0.279834	0.00360353	0.0501871	184.115	0.628205	0.283784	0.00572683	0.0780648
ENSMUSG00000101952	Gm10550	4.67479	-0.104537	0.349133	0.313117	0.693304	3.6778	0.103595	0.437839	0.526286	0.845695	3.6778	0.00934363	0.362156	0.93468	0.985133
ENSMUSG00000026280	Atg4b	1173.32	-0.36564	0.130418	0.000249872	0.00434117	721.481	1.08237	0.228	3.15952e-07	2.01497e-05	721.481	1.13496	0.229154	8.19013e-08	7.93117e-06
ENSMUSG00000026281	Dtymk	2206.9	-0.0873659	0.118614	0.227398	0.603742	2143.79	0.0352689	0.238802	0.865124	0.967664	2143.79	0.127937	0.231277	0.468294	0.825249
ENSMUSG00000026283	Ing5	2097.89	-0.0321798	0.086488	0.567363	0.869783	402.752	-0.152442	0.168432	0.326942	0.724501	402.752	-0.0949547	0.163151	0.517891	0.851112
ENSMUSG00000088961		1.68563	0.0556939	0.410384	0.503537
ENSMUSG00000073609	D2hgdh	117.726	0.0494552	0.141251	0.516116	0.843138	51.6497	-0.0583506	0.315501	0.794819	0.947066	51.6497	0.0951136	0.291569	0.620405	0.899961
ENSMUSG00000093805		11.8727	0.173602	0.341473	0.140538	0.47013
ENSMUSG00000099624		4.83001	0.0576105	0.303792	0.539813	0.856147
ENSMUSG00000073608	Gm6086	2.77274	0.0428756	0.320257	0.642071	0.90034	1.47862	-0.0884998	0.458797	0.377078		1.47862	-0.0166366	0.374149	0.809281
ENSMUSG00000100347	Gm7895	5.90663	0.1339	0.347827	0.223419	0.598286	1.64252	0.0468044	0.448277	0.621874		1.64252	0.0497808	0.378751	0.472322
ENSMUSG00000051185	Fam174a	170.061	-0.10121	0.15692	0.225359	0.601096	58.6931	-0.0453236	0.279705	0.836612	0.960118	58.6931	-0.0907264	0.264483	0.636807	0.907678
ENSMUSG00000103973	RP23-192P10.3	11.8716	-0.0845141	0.25487	0.368313	0.740312	1.09341	-0.0253927	0.446805	0.792475		1.09341	-0.0130275	0.374989	0.846764
ENSMUSG00000081051	Gm15427	35.2129	-0.067483	0.202573	0.432532	0.792672	364.049	0.252061	0.428709	0.287702	0.691544	364.049	0.145286	0.355116	0.40851	0.790648
ENSMUSG00000040710	St8sia4	12.1932	0.129405	0.293468	0.217537	0.591133	1.22547	-0.0253512	0.450344	0.639993		1.22547	-0.0133383	0.376756	0.812928
ENSMUSG00000040693	Slco4c1	735.684	-0.271109	0.177314	0.0117247	0.0922312	68.0135	1.4914	0.470798	0.000116743	0.00333518	68.0135	0.0203582	0.293661	0.913677	0.981081
ENSMUSG00000097814	Panct2	468.412	-0.695666	0.138039	1.48263e-08	8.21457e-07	10.1178	-0.081938	0.377063	0.70442	0.92029	10.1178	-0.177716	0.36987	0.315903	0.718246
ENSMUSG00000100454	Gm28901	1.71509	-0.0123359	0.379875	0.881143		2.71398	-0.187286	0.494898	0.125351	0.479543	2.71398	-0.0668743	0.377019	0.459738
ENSMUSG00000044757	Gm6430	3.9732	-0.119175	0.37146	0.266295	0.646459	2.12069	-0.0321725	0.43635	0.803223	0.95045	2.12069	0.00355283	0.367494	0.971847
ENSMUSG00000044768	D1Ertd622e	115.929	0.0263625	0.124008	0.712057	0.925569	35.05	-0.379701	0.504376	0.132132	0.491604	35.05	-0.190903	0.376858	0.285606	0.689087
ENSMUSG00000040648	Ppip5k2	3300.54	0.0193684	0.0846817	0.727364	0.930158	400.061	-0.111763	0.301533	0.618761	0.88956	400.061	-0.102389	0.27971	0.592106	0.887904
ENSMUSG00000026333	Gin1	279.007	-0.287616	0.163953	0.00660835	0.0607463	122.628	0.110075	0.288818	0.628111	0.892872	122.628	0.0424618	0.264199	0.828076	0.963568
ENSMUSG00000026335	Pam	405.006	0.781842	0.16087	6.12904e-08	2.88349e-06	27.2686	0.064059	0.357395	0.777428	0.942769	27.2686	-0.101164	0.328589	0.573042	0.877945
ENSMUSG00000104140	RP24-244I20.2	2.9534	0.0243316	0.331012	0.786663	0.94702	0.482215	0.0111926	0.452304	0.894383		0.482215	-0.0249102	0.381338	0.612744
ENSMUSG00000089782	Gm3531	30.3706	0.0220549	0.180103	0.782239	0.94624	34.9816	-0.0350461	0.319525	0.876483	0.971069	34.9816	0.0399607	0.289935	0.834783	0.965195
ENSMUSG00000089706	B230216N24Rik	6.64644	0.0300683	0.266458	0.735843	0.932806	2.57394	-0.0217523	0.43983	0.849613	0.962697	2.57394	-0.0967112	0.392148	0.214697
ENSMUSG00000089791	Gm3555	18.678	-0.0131533	0.187921	0.870025	0.970757	4.89335	0.256381	0.512712	0.158621	0.536774	4.89335	0.213955	0.442925	0.10523	0.439851
ENSMUSG00000100009		6.81487	0.172917	0.379559	0.150701	0.487692
ENSMUSG00000099453		1.26271	-0.00131189	0.38231	0.987154
ENSMUSG00000082431	Tdpx-ps1	18.0879	-0.00831008	0.194094	0.918277	0.982021	3.25882	-0.0170143	0.433899	0.894811	0.974821	3.25882	-0.118568	0.397862	0.181344	0.567621
ENSMUSG00000099835	Gm29668	1.84348	0.0212896	0.366686	0.804257		3.40592	0.0200741	0.434454	0.880049	0.972351	3.40592	-0.0613955	0.376358	0.485253	0.834188
ENSMUSG00000050840	Cdh20	1.68554	0.00251707	0.336408	0.977301		6.8695	0.134776	0.446084	0.41444	0.787626	6.8695	-0.0533518	0.367087	0.631053	0.905515
ENSMUSG00000047496	Rnf152	34.252	0.0558918	0.223496	0.521365	0.845749	3.04506	0.18671	0.480992	0.217271	0.616278	3.04506	0.0761505	0.375988	0.460327	0.819625
ENSMUSG00000067017	Gm3608	1119.34	-0.113425	0.126201	0.14072	0.470674	39.3298	0.268197	0.419953	0.2692	0.674957	39.3298	0.205501	0.371397	0.276714	0.681988
ENSMUSG00000056536	Pign	1548.87	-0.112491	0.107036	0.105388	0.397336	233.085	0.601189	0.45778	0.0457199	0.276573	233.085	0.394861	0.41074	0.0961101	0.4209
ENSMUSG00000100672		2.44272	-0.00668949	0.338894	0.939644	0.986898
ENSMUSG00000101219		2.29137	-0.197412	0.526158	0.102532	0.390345
ENSMUSG00000101656	Gm8004	4.74388	0.0864323	0.340856	0.385894	0.755846	1.95328	0.074861	0.462514	0.197325	0.592389	1.95328	0.0425323	0.382193	0.335317
ENSMUSG00000026319	2310035C23Rik	1828.42	0.00203716	0.0708231	0.965905	0.992606	243.521	-0.00214712	0.222536	0.98964	0.997579	243.521	-0.116153	0.217021	0.513299	0.848456
ENSMUSG00000104044	RP24-283P23.1	50.9528	-0.0472983	0.216172	0.580334	0.875163	18.9654	-0.315382	0.45764	0.197442	0.592389	18.9654	-0.170747	0.36355	0.339703	0.737977
ENSMUSG00000026321	Tnfrsf11a	42.498	1.61593	0.372252	6.76849e-07	2.47564e-05	2.61182	-0.0735789	0.445806	0.5481	0.855857	2.61182	-0.082289	0.383527	0.349659
ENSMUSG00000099843	Gm7160	23.7696	-0.205831	0.322565	0.0920176	0.365471	2.92391	-0.0654231	0.42184	0.695364	0.917461	2.92391	-0.0890007	0.370979	0.469365	0.82575
ENSMUSG00000038866	Zcchc2	647.852	-0.103744	0.140808	0.196568	0.562424	54.7749	-0.893039	0.398302	0.00354773	0.0497759	54.7749	-0.75322	0.404733	0.00782507	0.0958986
ENSMUSG00000102501		1.5045	0.0386863	0.382495	0.651511
ENSMUSG00000044340	Phlpp1	856.932	-0.0576435	0.125337	0.429569	0.790763	54.6266	-0.662003	0.523552	0.0352166	0.235203	54.6266	-1.10969	0.591289	0.00351319	0.0558941
ENSMUSG00000103291	RP24-92A2.1	20.6829	-0.0157814	0.206075	0.848364	0.964491	9.59769	-0.168003	0.437448	0.385757	0.768633	9.59769	-0.247326	0.4556	0.10287	0.436648
ENSMUSG00000057329	Bcl2	6.25713	-0.318623	0.513228	0.049508	0.250194	0.695804	-0.0669487	0.461955	0.263312		0.695804	-0.0384707	0.382012	0.417369
ENSMUSG00000009905	Kdsr	1015.33	0.042062	0.10062	0.507233	0.83871	139.895	-0.189484	0.233572	0.344145	0.739136	139.895	-0.0957533	0.218356	0.592312	0.887904
ENSMUSG00000009907	Vps4b	2785.73	-0.00971379	0.0715193	0.839556	0.961815	641.697	-0.230735	0.266743	0.288176	0.692042	641.697	0.028749	0.237553	0.880001	0.973217
ENSMUSG00000067006	Serpinb5	3.73509	0.0441058	0.312757	0.633122	0.896462	2.75975	-0.147035	0.481869	0.118054	0.467405	2.75975	-0.0341521	0.374105	0.661249
ENSMUSG00000026315	Serpinb8	30.8977	0.113751	0.220089	0.226807	0.60308	1.17076	0.0621783	0.45031	0.576103		1.17076	0.0601157	0.381006	0.42362
ENSMUSG00000026312		2.74343	0.260025	0.600749	0.0562174	0.270714
ENSMUSG00000100290		1.44509	-0.0683429	0.425845	0.411242
ENSMUSG00000102728		1.70516	0.00245862	0.353357	0.977396
ENSMUSG00000038702	Dsel	661.679	-0.00702213	0.0893947	0.903964	0.978574	18.5785	-0.305719	0.435135	0.214687	0.613702	18.5785	-0.505626	0.5939	0.0460681	0.284936
ENSMUSG00000097648	9330185C12Rik	94.4967	0.051487	0.141652	0.500167	0.834979	4.02314	-0.0807407	0.419592	0.648141	0.901966	4.02314	-0.0358238	0.35486	0.785772	0.952286
ENSMUSG00000102030	Gm29106	17.1392	0.133012	0.273158	0.19847	0.565201	0.564411	-0.020733	0.451373	0.835263		0.564411	0.0192017	0.377764	0.762419
ENSMUSG00000099870		1.41987	0.171404	0.54288	0.0901398
ENSMUSG00000026374	Tsn	3396.25	-0.00451864	0.0882696	0.937511	0.986663	978.27	-0.169766	0.244697	0.408964	0.784981	978.27	-0.0969066	0.228995	0.595314	0.890057
ENSMUSG00000026377	Nifk	2234.22	-0.0468877	0.113195	0.494749	0.831809	1588.96	0.427872	0.286228	0.0674638	0.347511	1588.96	0.447387	0.292674	0.0444137	0.279873
ENSMUSG00000064302	Clasp1	2261.66	0.0927303	0.115635	0.195117	0.560575	271.953	0.528826	0.347404	0.044637	0.271855	271.953	0.00191701	0.262924	0.995113	0.999169
ENSMUSG00000077257		1.13751	0.0293024	0.369369	0.734669
ENSMUSG00000107722		6.99701	-0.0413292	0.24086	0.637477	0.89808	2.99969	0.153021	0.474619	0.217787	0.616423	2.99969	0.0434113	0.374142	0.598242	0.891476
ENSMUSG00000100770	Gm28466	4.43757	0.0248302	0.334076	0.782114	0.94624	4.6545	-0.00301215	0.439452	0.973523	0.993026	4.6545	-0.0789143	0.386225	0.252364	0.655684
ENSMUSG00000026380	Tfcp2l1	44435.2	-0.142293	0.127215	0.0757474	0.325571	6330.56	-0.226629	0.407086	0.331518	0.728657	6330.56	-0.142297	0.346708	0.424904	0.801311
ENSMUSG00000089601		19.8861	-0.0447679	0.206683	0.595194	0.880805
ENSMUSG00000101624	Gm28882	27.4548	-0.0822891	0.241256	0.372079	0.743682	5.06806	-0.0220702	0.44439	0.826726	0.958148	5.06806	0.0249556	0.374055	0.741779	0.940731
ENSMUSG00000048402	Gli2	850.601	-0.00237342	0.190229	0.976475	0.9948	227.524	-0.286802	0.446346	0.230425	0.631299	227.524	-1.47493	0.771971	0.00193952	0.0357456
ENSMUSG00000098273		2.9121	-0.0674657	0.388046	0.462661	0.811679
ENSMUSG00000097408	Gm26831	3.05137	0.00117558	0.308433	0.989522	0.997147	1.00017	0.0415016	0.451053	0.649408		1.00017	0.0179189	0.376913	0.781826
ENSMUSG00000099860	Gm29456	5.02183	-0.0712775	0.301281	0.457031	0.807524	0.567993	0.0441939	0.455498	0.573721		0.567993	0.0132562	0.378448	0.841857
ENSMUSG00000037035	Inhbb	24.4903	0.12627	0.244793	0.202361	0.570814	20.6971	-0.169061	0.454129	0.336889	0.732608	20.6971	-2.19281	1.38274	0.00266207	0.0451685
ENSMUSG00000004451	Ralb	2078.18	-0.0502015	0.116599	0.473017	0.818875	277.377	-0.615297	0.360946	0.0232005	0.182356	277.377	-0.306831	0.312674	0.150668	0.520226
ENSMUSG00000101437		5.16439	-0.0543485	0.293329	0.559334	0.86576
ENSMUSG00000098447	Gm27184	3.18019	-0.0551316	0.341967	0.555614	0.863972	2.21472	0.149797	0.461116	0.319628	0.717932	2.21472	0.0541543	0.369924	0.613417
ENSMUSG00000098923	Tmem185b	388.687	-0.292308	0.150833	0.0043826	0.0447139	188.247	0.0824747	0.230808	0.680106	0.912645	188.247	0.325814	0.244333	0.0964628	0.421808
ENSMUSG00000101731	3830432H09Rik	32.6775	0.0197876	0.173494	0.802082	0.950223	1.40738	0.153147	0.485888	0.133838		1.40738	-0.0565803	0.384161	0.484842
ENSMUSG00000026383	Epb4.1l5	1190.35	0.0448259	0.107254	0.499249	0.834644	209.333	1.67644	0.30321	2.98671e-09	3.10831e-07	209.333	0.379173	0.281568	0.0758075	0.374632
ENSMUSG00000102687	RP23-386K20.6	8.14703	-0.176334	0.398792	0.148189	0.483552	18.3945	0.196137	0.468229	0.283549	0.687934	18.3945	-0.100974	0.378224	0.394387	0.778981
ENSMUSG00000026384	Ptpn4	2246.53	-0.00390938	0.0897961	0.946641	0.988204	117.706	-0.131777	0.336452	0.567423	0.866948	117.706	-0.246292	0.349295	0.232436	0.633402
ENSMUSG00000091876	Gm3851	7.80085	0.0165599	0.234424	0.846672	0.963807	5.29207	-0.116373	0.469639	0.129519	0.487191	5.29207	0.0465772	0.376333	0.559032	0.871406
ENSMUSG00000103146	RP23-274C16.4	43.431	0.0411361	0.203538	0.622729	0.890874	11.4443	0.320291	0.512988	0.160966	0.539954	11.4443	0.0115608	0.347233	0.935365	0.985315
ENSMUSG00000090277		3.09908	0.0866746	0.373646	0.380136	0.750981
ENSMUSG00000101224		2.20198	-0.0414512	0.364631	0.641952	0.90034
ENSMUSG00000036975	Tmem177	490.588	0.0996977	0.12386	0.184267	0.544121	111.805	-0.123491	0.278015	0.574324	0.870706	111.805	0.096564	0.257739	0.614403	0.897432
ENSMUSG00000036962	Cfap221	1.57977	0.0752584	0.39793	0.41629		3.2117	0.558065	1.14243	0.00963399	0.100702	3.2117	0.121529	0.396215	0.225671	0.624849
ENSMUSG00000050777	Tmem37	63.714	-0.012434	0.140194	0.867299	0.970028	123.254	-0.27632	0.340746	0.255122	0.659965	123.254	-0.4573	0.396857	0.0608124	0.331529
ENSMUSG00000026385	Dbi	2801.33	0.143821	0.176144	0.117413	0.422775	2808.76	-0.229852	0.239482	0.26101	0.66637	2808.76	-0.196891	0.231047	0.289015	0.691976
ENSMUSG00000026388	3110009E18Rik	55.2554	-0.0467165	0.150848	0.547036	0.860404	31.4368	-0.0198438	0.348079	0.928908	0.98282	31.4368	0.0171184	0.310612	0.927051	0.983143
ENSMUSG00000026389	Steap3	206.784	1.479	0.224097	3.07448e-12	2.95575e-10	69.4926	-0.332126	0.419999	0.189159	0.581238	69.4926	-0.405072	0.466322	0.0830958	0.390601
ENSMUSG00000058665	En1	8.05835	0.127109	0.347621	0.241445	0.61996	3.37412	-0.0269687	0.444171	0.791468	0.946265	3.37412	-0.0578059	0.381098	0.408004	0.790429
ENSMUSG00000097881		16.7356	0.00188413	0.19452	0.981437	0.996264
ENSMUSG00000104332		2.22944	0.0184207	0.369637	0.828633	0.95875
ENSMUSG00000003721	Insig2	571.864	0.111602	0.134132	0.159209	0.502735	134.038	-0.117753	0.258571	0.577089	0.872427	134.038	-0.12674	0.246624	0.501102	0.841476
ENSMUSG00000104253	RP24-98O21.4	38.8507	0.00550685	0.159225	0.942938	0.987389	0.617235	0.0520366	0.45455	0.600199		0.617235	0.0376702	0.38013	0.582523
ENSMUSG00000026339	Ccdc93	1712.75	-0.146275	0.110999	0.0502621	0.252536	302.485	-0.245983	0.264519	0.255682	0.661134	302.485	-0.162547	0.246605	0.391919	0.777388
ENSMUSG00000085857		10.4259	-0.142285	0.330604	0.198286	0.565007
ENSMUSG00000083582		1.31887	0.201817	0.584907	0.0564854
ENSMUSG00000050534	Htr5b	5.88969	0.385918	0.625048	0.0331073	0.190326	17.6234	-0.192899	0.455599	0.311374	0.71234	17.6234	0.0536188	0.353816	0.704178	0.933553
ENSMUSG00000001674	Ddx18	4173.88	0.0337546	0.0852545	0.543189	0.858478	1340.48	0.109286	0.232094	0.587097	0.875701	1340.48	0.221107	0.233078	0.236275	0.63665
ENSMUSG00000026341	Actr3	8178.15	0.00377859	0.0972045	0.951345	0.989499	1123.58	-0.320881	0.23548	0.111415	0.453636	1123.58	-0.159688	0.2179	0.372594	0.762902
ENSMUSG00000026342	Slc35f5	310.714	-0.298161	0.167824	0.00576601	0.05515	28.1939	-0.16128	0.360248	0.485542	0.824649	28.1939	-0.1374	0.32651	0.462745	0.821313
ENSMUSG00000026343		1.47505	0.137752	0.507298	0.13461
ENSMUSG00000026344		4.02255	0.106098	0.36526	0.307752	0.689303
ENSMUSG00000049690		16.7017	0.0988956	0.255872	0.303489	0.685465
ENSMUSG00000036155	Mgat5	548.579	-0.156999	0.164786	0.0856064	0.350245	72.3495	-0.24836	0.343303	0.300633	0.702911	72.3495	-0.548834	0.442327	0.0358102	0.246681
ENSMUSG00000104039		3.02123	0.0404111	0.332983	0.659142	0.906202
ENSMUSG00000104378	RP23-323H18.2	17.8541	0.101195	0.261435	0.297071	0.677768	4.19075	0.203844	0.480035	0.229924	0.630982	4.19075	0.0717335	0.370965	0.517813	0.851112
ENSMUSG00000099471	Gm8451	6.47211	-0.00228521	0.250064	0.979004	0.995498	12.6949	0.129782	0.426694	0.490285	0.827378	12.6949	-0.0417035	0.354889	0.751902	0.944029
ENSMUSG00000065687		2.02233	0.0314904	0.341938	0.726319	0.930031
ENSMUSG00000103390		1.3876	-0.00674477	0.386072	0.933358
ENSMUSG00000026347	Tmem163	7.85664	-1.55645	0.83347	0.000361115	0.00597916	1.82841	-0.117852	0.467795	0.231463	0.632086	1.82841	-0.128135	0.411243	0.0190895
ENSMUSG00000026348	Acmsd	15.2181	-0.0280912	0.211331	0.737014	0.933359	4.38209	0.213149	0.521064	0.0590417	0.322094	4.38209	0.146533	0.417668	0.0571357	0.320561
ENSMUSG00000026349	Ccnt2	4038.17	-0.138493	0.108009	0.0565268	0.271807	845.898	-0.201663	0.2634	0.348978	0.74278	845.898	-0.197411	0.254743	0.307731	0.709899
ENSMUSG00000051590	Map3k19	2.70912	-0.0599654	0.379807	0.510299	0.840181	0.666461	0.0143118	0.449574	0.875928		0.666461	-0.00020295	0.376855	0.995665
ENSMUSG00000036104	Rab3gap1	2367.78	-0.0733035	0.111218	0.286298	0.666951	140.385	-0.101243	0.218864	0.594758	0.878505	140.385	-0.0992548	0.210527	0.569743	0.876323
ENSMUSG00000036086	Zranb3	1839.08	-0.182905	0.109375	0.0196093	0.134543	197.664	-0.110748	0.226663	0.571684	0.869526	197.664	-0.0376952	0.213582	0.82957	0.963919
ENSMUSG00000099760	Gm28800	10.3245	-0.248526	0.4094	0.074737	0.322539	3.9172	-0.11329	0.43681	0.493606	0.829067	3.9172	-0.308158	0.562945	0.0166147	0.155762
ENSMUSG00000104164	RP24-338G10.1	156.273	-0.131161	0.217608	0.173385	0.527042	24.5329	-0.0830547	0.370432	0.701935	0.919416	24.5329	-0.204325	0.376845	0.261121	0.666549
ENSMUSG00000058603	Rpl28-ps1	18.4634	-0.00457304	0.191018	0.95475	0.990137	58.5225	0.263381	0.440039	0.263242	0.668648	58.5225	0.18772	0.377059	0.292186	0.695451
ENSMUSG00000102782	RP23-264E23.2	32.19	0.0370077	0.31452	0.686136	0.916826	4.73607	0.0492745	0.433065	0.734815	0.930157	4.73607	-0.13343	0.404099	0.132173	0.490815
ENSMUSG00000103999	RP23-264E23.1	16.9875	-0.101914	0.298917	0.311268	0.692198	2.70234	-0.106306	0.459464	0.347037	0.741447	2.70234	-0.0993798	0.393756	0.0903661
ENSMUSG00000056211	R3hdm1	1791.69	-0.0135894	0.149706	0.857821	0.96726	658.346	0.04615	0.258332	0.822235	0.95631	658.346	-0.20198	0.261568	0.30194	0.70471
ENSMUSG00000101535	Gm29383	8.31741	-0.0190024	0.289843	0.83232	0.95943	1.09216	-0.00693811	0.447441	0.931327		1.09216	-0.0251532	0.377283	0.695902
ENSMUSG00000104239	RP23-114N13.2	14.344	-0.00957929	0.244146	0.911713	0.980253	2.33535	-0.0560276	0.439032	0.668568	0.908353	2.33535	-0.159034	0.422699	0.0723438
ENSMUSG00000102179	RP23-114N13.3	9.27013	0.110507	0.30061	0.279894	0.660189	25.2836	0.36412	0.573022	0.107426	0.446079	25.2836	0.0671961	0.358564	0.622743	0.900933
ENSMUSG00000103497	RP23-114N13.4	27.1068	-0.0158081	0.172346	0.840759	0.962068	32.8359	-0.223975	0.366421	0.351338	0.74359	32.8359	-0.160612	0.325853	0.408498	0.790648
ENSMUSG00000065520		1.28756	0.0274275	0.36996	0.750051
ENSMUSG00000026353	Ubxn4	2022.2	-0.0151479	0.104422	0.815612	0.953994	503.669	0.156583	0.234066	0.437482	0.799454	503.669	0.109229	0.221677	0.543655	0.864205
ENSMUSG00000026354	Lct	27.8611	1.15541	0.476688	0.000243674	0.00426701	6.12312	-0.0588027	0.427147	0.71486	0.923713	6.12312	0.252567	0.474379	0.0779869	0.37958
ENSMUSG00000026355	Mcm6	12686.7	-0.0779162	0.104777	0.238244	0.615879	3221.13	0.130618	0.247437	0.529568	0.846774	3221.13	0.526745	0.28596	0.0179959	0.164119
ENSMUSG00000026356	Dars	6705.96	-0.0671844	0.124735	0.359297	0.734448	2151.92	-0.0208982	0.241375	0.914169	0.980166	2151.92	-0.0112745	0.227575	0.949231	0.988034
ENSMUSG00000100078	Gm6170	15.942	-0.0635296	0.223064	0.469872	0.816743	13.3862	0.0613641	0.357009	0.785724	0.944001	13.3862	-0.0585927	0.321588	0.736464	0.940183
ENSMUSG00000045382	Cxcr4	39.7952	-0.00088292	0.159816	0.990849	0.997515	0.639302	-0.0168009	0.450147	0.840868		0.639302	-0.0354001	0.38078	0.55525
ENSMUSG00000042581	Thsd7b	1.91192	0.0100786	0.338954	0.909287		1.35218	0.0476502	0.450449	0.603678		1.35218	-0.0645984	0.387002	0.245365
ENSMUSG00000089648	Gm15790	2.66974	-0.036582	0.343141	0.686153	0.916826	0.762132	-0.0342674	0.451814	0.681454		0.762132	-0.0271514	0.378763	0.654013
ENSMUSG00000094122	Rpl31-ps9	1.60894	-0.0645444	0.390882	0.475911		4.40008	0.135752	0.463629	0.304708	0.706422	4.40008	0.0752852	0.379388	0.412129	0.792242
ENSMUSG00000026401	Daf2	1.79629	0.128752	0.455844	0.209643		0.631083	0.060554	0.45932	0.565971		0.631083	0.0514909	0.384697	0.331836
ENSMUSG00000087691		23.9573	0.0975626	0.245683	0.303404	0.685399
ENSMUSG00000086825	Gm15675	39.1859	0.0499409	0.178329	0.539505	0.856009	7.73121	-0.00210792	0.414533	0.98759	0.997045	7.73121	-0.0424854	0.359047	0.734394	0.939693
ENSMUSG00000026399	Cd55	536.639	-0.0216067	0.0877263	0.705485	0.923183	158.322	-0.481882	0.338081	0.0591469	0.322482	158.322	0.0253385	0.258441	0.896415	0.976811
ENSMUSG00000085526		2.77282	0.239091	0.551729	0.0772271	0.329081
ENSMUSG00000102139		1.49835	-0.0745914	0.39174	0.424427
ENSMUSG00000042554		1.1955	0.0513817	0.406956	0.535243
ENSMUSG00000026409	Pfkfb2	510.825	-0.687997	0.133391	7.70765e-09	4.57252e-07	36.2821	-0.648567	0.477786	0.0335369	0.22982	36.2821	-0.270716	0.358052	0.197535	0.589695
ENSMUSG00000046404	Yod1	480.842	-0.0146098	0.0904427	0.803361	0.950747	69.9845	-0.124678	0.369055	0.579968	0.87395	69.9845	-0.161715	0.347804	0.381753	0.770387
ENSMUSG00000104515		10.1644	-0.026385	0.231936	0.758466	0.939935
ENSMUSG00000042510	AA986860	97.3118	-0.0707057	0.150829	0.373508	0.745024	39.0228	-1.28809	0.816824	0.00511567	0.0649356	39.0228	-0.211405	0.390883	0.234721	0.636429
ENSMUSG00000016528	Mapkapk2	860.923	0.0385251	0.0821859	0.471785	0.81779	48.1016	-0.889749	0.535781	0.0104941	0.107549	48.1016	-0.836685	0.563504	0.0105908	0.116322
ENSMUSG00000102856	RP23-122P5.3	23.3507	-0.00174649	0.184551	0.982546	0.996434	1.75913	0.0640862	0.441472	0.634359	0.895375	1.75913	-0.146328	0.418186	0.0451028
ENSMUSG00000016526	Dyrk3	1112.41	0.442683	0.132043	1.83608e-05	0.000475094	639.841	0.00589162	0.250988	0.981899	0.995352	639.841	0.473257	0.292355	0.0333752	0.237323
ENSMUSG00000026427	Eif2d	2442.27	0.0521324	0.0839695	0.336773	0.716063	1058.61	0.0101568	0.192851	0.939594	0.985519	1058.61	0.321877	0.201539	0.0632515	0.339042
ENSMUSG00000026430	Rassf5	116.226	0.125333	0.175237	0.160915	0.505193	12.6407	-0.0340042	0.404476	0.85366	0.964135	12.6407	-0.21685	0.430746	0.147577	0.514646
ENSMUSG00000101729		1.37954	0.108781	0.479866	0.195856
ENSMUSG00000042349	Ikbke	188.211	-0.0231548	0.110474	0.730701	0.931441	9.48081	-0.370877	0.579639	0.0961399	0.419969	9.48081	0.0511732	0.349383	0.728428	0.938577
ENSMUSG00000102027		1.97683	-0.0730936	0.413292	0.40959	0.774388
ENSMUSG00000102055		2.64449	0.00829322	0.341211	0.925089	0.983559
ENSMUSG00000026425	Srgap2	2099.8	0.0281312	0.120135	0.689565	0.917421	311.171	-0.0610066	0.319466	0.783866	0.943948	311.171	0.00985535	0.288146	0.963965	0.991843
ENSMUSG00000102733	RP24-81A5.3	13.0514	-0.00804734	0.199278	0.921422	0.982749	2.38239	-0.112636	0.465094	0.261557	0.666965	2.38239	-0.0692857	0.383218	0.32153
ENSMUSG00000104060	RP24-81A5.2	14.4691	0.0922141	0.283692	0.345823	0.723162	11.2289	-0.292193	0.563222			11.2289	-0.0245578	0.362064
ENSMUSG00000101778	Gm29488	46.9199	0.0128025	0.182616	0.872493	0.97127	12.1321	-0.183903	0.468814	0.270283	0.675515	12.1321	-0.249086	0.485159	0.044091	0.278662
ENSMUSG00000099959	Gm29487	2.43694	0.00733855	0.337538	0.933894	0.985923	4.48979	-0.0231542	0.44008	0.836986	0.960118	4.48979	-0.0695874	0.382039	0.360792	0.752439
ENSMUSG00000076287		2.50465	-0.104444	0.411761	0.298002	0.678732
ENSMUSG00000055184	Fam72a	164.712	-0.0625903	0.123232	0.388603	0.758465	73.0277	-0.221379	0.260084	0.304345	0.706335	73.0277	-0.0284114	0.233147	0.876299	0.973217
ENSMUSG00000052688	5430435G22Rik	3.93013	0.0216434	0.286874	0.809497	0.952421	1.80511	0.0300609	0.444904	0.800178	0.949059	1.80511	0.104152	0.395648	0.162401
ENSMUSG00000042268	Slc26a9	5.38711	-0.265161	0.488422	0.0720358	0.315641	4.39466	0.0874006	0.439548	0.558265	0.861093	4.39466	-0.0041445	0.36524	0.967152	0.992548
ENSMUSG00000042251	Pm20d1	226.225	0.356176	0.198316	0.00356768	0.0380599	79.1396	0.146255	0.351346	0.532699	0.848157	79.1396	0.766098	0.551134	0.0165761	0.155574
ENSMUSG00000013275	Slc41a1	1139.48	0.0842298	0.0989065	0.184347	0.54416	113.585	-0.336653	0.438329	0.184219	0.575209	113.585	-0.320207	0.43028	0.129507	0.485812
ENSMUSG00000026433	Rab29	228.326	-0.0873637	0.135952	0.26104	0.640576	132.748	-0.644687	0.299012	0.00857088	0.0933045	132.748	-0.234117	0.254652	0.231332	0.632219
ENSMUSG00000026434	Nucks1	17048.1	-0.355418	0.118937	0.00016062	0.00299368	883.011	-0.17536	0.296203	0.438367	0.799841	883.011	-0.508637	0.362351	0.0362099	0.247906
ENSMUSG00000103569	RP24-325N3.3	134.596	-0.0527384	0.153013	0.50078	0.834979	11.7801	0.044668	0.396306	0.8228	0.956625	11.7801	0.00445839	0.343718	0.978225	0.995511
ENSMUSG00000026435	Slc45a3	133.531	-0.128652	0.155207	0.135111	0.458298	70.9209	3.31561	0.570772	2.43848e-10	3.37133e-08	70.9209	2.07766	0.597935	2.18706e-05	0.000992951
ENSMUSG00000026436	Elk4	362.438	0.0295687	0.162136	0.704784	0.923089	22.7476	-0.248552	0.404911	0.301437	0.703403	22.7476	-0.170664	0.351734	0.356981	0.749811
ENSMUSG00000059149	Mfsd4	220.406	0.0367231	0.173327	0.645398	0.901337	7.89384	0.0126918	0.432637	0.928152	0.982549	7.89384	0.0400482	0.369106	0.694922	0.930925
ENSMUSG00000103966		11.4551	0.234535	0.379215	0.0796884	0.335921
ENSMUSG00000026437	Cdk18	513.837	-0.0694791	0.159793	0.389635	0.759201	19.2571	-0.243872	0.456171	0.260194	0.665532	19.2571	-0.303256	0.484902	0.097183	0.423325
ENSMUSG00000079330	Lemd1	50.9505	-0.129765	0.198882	0.165476	0.513247	3.30135	-0.0156664	0.431345	0.909052	0.978315	3.30135	-0.0146907	0.367094	0.875819	0.973217
ENSMUSG00000118219		203.876	-0.191876	0.220095	0.0694848	0.308676	3.48922	0.0331294	0.431477	0.81975	0.954988	3.48922	-0.0395674	0.369229	0.692712	0.930199
ENSMUSG00000065435		10.9907	-0.0322599	0.216723	0.702616	0.922025
ENSMUSG00000101549	Gm29630	51.7055	-0.286653	0.258917	0.0234403	0.151525	5.10101	0.0433931	0.411098	0.813257	0.953099	5.10101	-0.0216341	0.353486	0.870619	0.971984
ENSMUSG00000089808	Gm7241	5.10911	-0.201318	0.438558	0.11942	0.427156	3.39176	-0.0836901	0.433774	0.597414	0.879592	3.39176	0.113888	0.380068	0.374138	0.764197
ENSMUSG00000042115	Klhdc8a	5.91027	-0.00605396	0.285782	0.945872	0.988037	3.78295	0.201977	0.501571	0.133044	0.49293	3.78295	0.024662	0.370883	0.776425	0.950938
ENSMUSG00000009772	Nuak2	155.613	0.467414	0.229944	0.00115268	0.0155242	30.4364	-0.225193	0.341178	0.346856	0.741362	30.4364	0.152913	0.300992	0.442184	0.810405
ENSMUSG00000100658	F730311O21Rik	4.69298	0.240983	0.532439	0.0813898	0.340145	2.74265	-0.0668015	0.462857			2.74265	-0.0335245	0.381304
ENSMUSG00000042066	Tmcc2	274.741	-0.0662022	0.119557	0.355086	0.731141	8.94925	0.216722	0.447209	0.314541	0.715218	8.94925	-0.00341851	0.345393	0.980259	0.995511
ENSMUSG00000090079		3.10102	-0.111582	0.396611	0.284375	0.665088
ENSMUSG00000042046	Dstyk	1088.21	-0.000657027	0.0729173	0.989294	0.997096	67.4957	0.131869	0.333165	0.571587	0.869526	67.4957	0.0769785	0.298499	0.685343	0.928027
ENSMUSG00000097760	6030442K20Rik	28.1884	-0.223711	0.283184	0.0629202	0.290434	29.4061	0.0723239	0.408706	0.706035	0.920752	29.4061	0.108251	0.365719	0.460914	0.819978
ENSMUSG00000026439	Rbbp5	2870.22	-0.0251707	0.071636	0.595519	0.880888	943.412	-0.0527099	0.253817	0.801294	0.949542	943.412	-0.161435	0.249905	0.397555	0.781814
ENSMUSG00000048174	Tmem81	204.107	0.108944	0.139453	0.175802	0.531551	21.84	0.174515	0.369086	0.457441	0.807903	21.84	0.109751	0.323358	0.553964	0.869237
ENSMUSG00000053024	Cntn2	366.018	1.3372	0.190822	2.10754e-13	2.418e-11	3.49225	0.0167511	0.438904	0.89155	0.97431	3.49225	-0.0418286	0.375285	0.587089	0.885762
ENSMUSG00000026442	Nfasc	240.292	1.57721	0.280648	1.2672e-09	8.33027e-08	3.83612	0.273197	0.533837	0.125124	0.47946	3.83612	0.252497	0.485248	0.052744	0.307239
ENSMUSG00000101126		7.72574	0.459301	0.663798	0.0227499	0.148749
ENSMUSG00000026443	Lrrn2	35.0167	0.257857	0.366491	0.0603425	0.282632	7.78493	0.0381473	0.419219	0.822838	0.956625	7.78493	-0.161118	0.407811	0.184884	0.572314
ENSMUSG00000102709		1.87081	0.0234381	0.348277	0.791221
ENSMUSG00000054387	Mdm4	6143.29	-0.404864	0.184552	0.000990494	0.0137432	1987.52	0.18412	0.336918	0.440031	0.800356	1987.52	0.0250162	0.290583	0.87922	0.973217
ENSMUSG00000100228	Gm29257	2.78519	-0.076924	0.352118	0.430145	0.791131	2.38723	-0.0580886	0.443381	0.619545	0.889823	2.38723	-0.0610045	0.3779	0.458276
ENSMUSG00000026447	Pik3c2b	276.94	-0.0050263	0.16064	0.948022	0.988288	32.5285	0.578513	0.469735	0.053676	0.304942	32.5285	-0.0203879	0.303047	0.910502	0.9805
ENSMUSG00000101102		2.37859	-0.0779018	0.372305	0.419855	0.782958
ENSMUSG00000102425	RP23-304O9.1	15.2757	-0.0732194	0.228519	0.413996	0.778419	3.08833	-0.0672267	0.444358	0.593118	0.877872	3.08833	-0.0380416	0.372492	0.665743	0.919909
ENSMUSG00000046062	Ppp1r15b	6457.24	-0.07662	0.120841	0.290923	0.6719	284.284	-0.082358	0.209696	0.657008	0.905027	284.284	-0.183157	0.208879	0.294347	0.697503
ENSMUSG00000041757	Plekha6	140.692	0.446803	0.297201	0.00477715	0.0477382	13.1767	0.166065	0.441915	0.388018	0.769924	13.1767	0.023918	0.353355	0.860252	0.970363
ENSMUSG00000101693		1.46866	0.0279014	0.374143	0.743922
ENSMUSG00000103421		4.57714	-0.0753163	0.310174	0.436973	0.796022
ENSMUSG00000115958		6.30948	0.0511094	0.28516	0.579599	0.874948
ENSMUSG00000070645	Ren1	9.20167	0.125716	0.309287	0.234387	0.611794	7.55635	-0.100197	0.435756	0.532782	0.848162	7.55635	-0.0544315	0.364913	0.643744	0.909483
ENSMUSG00000070644	Etnk2	272.108	-0.192194	0.147657	0.0355929	0.199614	29.1458	-0.307867	0.491618	0.177559	0.565902	29.1458	-0.169305	0.382055	0.29435	0.697503
ENSMUSG00000070643	Sox13	196.091	-0.680192	0.200522	1.44324e-05	0.000384911	131.805	-0.0298167	0.343936	0.891282	0.97431	131.805	-0.872408	0.623907	0.0106025	0.116322
ENSMUSG00000064814		1.78181	-0.0315643	0.377435	0.71152
ENSMUSG00000090553	Snrpe	3246.03	-0.0253481	0.127014	0.725291	0.929936	4667.98	0.068339	0.283927	0.757182	0.936581	4667.98	-0.00332974	0.261494	0.984439	0.996941
ENSMUSG00000102976	Zc3h11a	523.758	-0.0999586	0.157631	0.231128	0.607688	67.8889	-0.163049	0.295677	0.471627	0.815509	67.8889	-0.291263	0.313221	0.168802	0.549746
ENSMUSG00000094410	Zbed6	3171.11	-0.028873	0.15175	0.706477	0.923504	427.424	-0.106629	0.348685	0.638374	0.897791	427.424	-0.438455	0.476301	0.066239	0.346793
ENSMUSG00000051998	Lax1	35.409	-0.159509	0.254517	0.130958	0.450408	4.75476	0.0633824	0.425733	0.698129	0.91771	4.75476	-0.00164291	0.359628	0.9875	0.997634
ENSMUSG00000026463	Atp2b4	645.279	0.132773	0.183055	0.147186	0.481572	97.964	-0.168305	0.327347	0.471726	0.815607	97.964	-0.399373	0.39142	0.0876496	0.40156
ENSMUSG00000102509		2.14104	0.0942593	0.426036	0.315845	0.695695
ENSMUSG00000010311	Optc	3.62066	0.0566092	0.327105	0.547746	0.860928	0.643331	-0.0584785	0.460112	0.366978		0.643331	-0.0141525	0.378269	0.77922
ENSMUSG00000041577	Prelp	1.64151	0.0611747	0.388233	0.496907		1.10697	-0.0621009	0.457562	0.435638		1.10697	-0.00462374	0.376323	0.929498
ENSMUSG00000020423	Btg2	1056.17	-0.0260047	0.0917618	0.660537	0.906827	232.7	0.0523057	0.314322	0.821079	0.955875	232.7	0.515809	0.421202	0.0471744	0.288752
ENSMUSG00000102380		8.0221	-0.0234877	0.240562	0.786053	0.946728
ENSMUSG00000073559	Gm8618	2.77791	0.0112275	0.330691	0.899686	0.977922	1.99289	0.105177	0.467273	0.15487	0.529493	1.99289	0.0196165	0.376695	0.663575
ENSMUSG00000026450	Chit1	24.8987	-0.090795	0.200759	0.305266	0.687118	318.75	5.59941	0.912209	7.35886e-11	1.18122e-08	318.75	5.51017	0.913433	1.35029e-10	2.90019e-08
ENSMUSG00000064246	Chil1	27.6155	-1.43005	0.396274	1.0381e-05	0.000287911	16.8151	-0.12853	0.407374	0.533645	0.84871	16.8151	-0.268775	0.452553	0.129301	0.485474
ENSMUSG00000042451		6.60642	0.0181458	0.239289	0.833231	0.959719
ENSMUSG00000042429	Adora1	2.90172	0.255255	0.596768	0.0580466	0.276511	1.15416	-0.00303045	0.449101	0.97716		1.15416	0.039024	0.379555	0.505597
ENSMUSG00000026459	Myog	5.05783	0.0253083	0.270158	0.776344	0.944188	0.881246	0.00150227	0.448529	0.986525		0.881246	-0.0144139	0.377187	0.825287
ENSMUSG00000026458	Ppfia4	498.111	-0.00474962	0.119367	0.945812	0.988017	57.6398	0.0551166	0.361795	0.806424	0.951207	57.6398	-0.0462875	0.322675	0.786981	0.952381
ENSMUSG00000042305	Tmem183a	4391.37	-0.0401058	0.104269	0.537473	0.855007	702.261	-0.343704	0.225852	0.0797931	0.378503	702.261	-0.133884	0.207	0.428568	0.803069
ENSMUSG00000050526	4933406M09Rik	2.69073	0.0970651	0.411029	0.321237	0.699629	1.16444	0.0469583	0.449017	0.627241		1.16444	-0.0519219	0.382098	0.460574
ENSMUSG00000026456	Cyb5r1	2323.55	-0.398057	0.125735	5.47776e-05	0.00122459	1672.54	-0.286903	0.187501	0.0913992	0.409216	1672.54	-0.079177	0.175946	0.60957	0.895167
ENSMUSG00000026457	Adipor1	3056.79	-0.0493667	0.100719	0.436943	0.796022	1244.45	0.113772	0.209339	0.544753	0.854366	1244.45	0.0855793	0.200674	0.616753	0.898085
ENSMUSG00000101061	Gm29643	24.3292	-0.0225137	0.189105	0.780641	0.945804	2.9428	-0.0884196	0.442697	0.522976	0.844805	2.9428	-0.0374457	0.367993	0.707226	0.934355
ENSMUSG00000102722		9.63961	-0.0379416	0.24045	0.664217	0.908444
ENSMUSG00000026455	Klhl12	1629.74	-0.020508	0.0917312	0.729302	0.930494	452.892	0.273987	0.275186	0.220472	0.619395	452.892	0.247075	0.266281	0.218521	0.614344
ENSMUSG00000042229	Rabif	1359.27	-0.0968927	0.119615	0.186682	0.547235	776.552	0.0712245	0.268155	0.74264	0.932292	776.552	0.165382	0.262354	0.404418	0.787174
ENSMUSG00000077202		3.21796	-0.0262815	0.307033	0.771666	0.943208
ENSMUSG00000096712	Gm15454	3.71912	-0.0353225	0.288435	0.697363	0.920253	1.65864	-0.134922	0.47349	0.217745		1.65864	-0.0576715	0.378727	0.46074
ENSMUSG00000101955		5.68164	-0.0839782	0.303609	0.391354	0.760068
ENSMUSG00000046367	Mgat4e	24.7657	0.107808	0.226601	0.251721	0.631682	4.21223	2.96546	1.26923	0.000940489	0.0181588	4.21223	0.331026	0.57234	0.0356826	0.24641
ENSMUSG00000042207	Kdm5b	23060.1	0.0522718	0.0956284	0.391243	0.760068	2072.16	0.279433	0.282982	0.219647	0.618952	2072.16	0.15818	0.257635	0.404723	0.787403
ENSMUSG00000097435		4.73882	-0.0393487	0.295398	0.667122	0.909686
ENSMUSG00000026452		18.0477	0.933163	0.639217	0.00219383	0.0260295
ENSMUSG00000073557	Ppp1r12b	352.928	0.00548103	0.131709	0.939981	0.986968	28.0862	0.15014	0.36245	0.519547	0.843577	28.0862	0.107756	0.323182	0.557129	0.870832
ENSMUSG00000103614	RP24-541A5.3	3.89007	0.358789	0.726753	0.0213053	0.142326	4.36538	-0.0727675	0.438384	0.602499	0.883071	4.36538	-0.0140403	0.36514	0.888814	0.974757
ENSMUSG00000077846	Gm22232	1.30313	0.0561982	0.428823	0.465559		1.3714	-0.0566296	0.460651	0.181744		1.3714	-0.0393604	0.383428	0.177459
ENSMUSG00000103976	RP24-541A5.1	51.6332	-0.0284715	0.181682	0.722852	0.929833	16.0224	0.288138	0.478713	0.206026	0.603798	16.0224	0.00449378	0.342877	0.977221	0.995402
ENSMUSG00000101168	Gm28892	5.98829	-0.0329915	0.29111	0.716177	0.92682	0.77086	0.0527787	0.453579	0.508619		0.77086	-0.00686858	0.376944	0.982109
ENSMUSG00000026429	Ube2t	886.31	0.0455288	0.104583	0.485175	0.826857	409.982	0.0323873	0.272485	0.884655	0.973578	409.982	0.178001	0.26953	0.368923	0.758725
ENSMUSG00000042793	Lgr6	23.5775	1.02529	0.569381	0.00100258	0.0138635	5.58412	0.407437	0.697064	0.0429219	0.265161	5.58412	0.0845548	0.376127	0.451756	0.815385
ENSMUSG00000097993	Ptprv	280.423	-0.00161255	0.101525	0.979828	0.99569	25.5637	-0.264428	0.425637	0.266065	0.671301	25.5637	-0.149161	0.351018	0.401599	0.785174
ENSMUSG00000097988	Gm10535	4.47816	0.0687305	0.315203	0.47403	0.819928	2.60704	0.0690314	0.437493	0.623137	0.890944	2.60704	0.0973822	0.381728	0.3635
ENSMUSG00000031506	Ptpn7	62.5855	0.146351	0.187587	0.119888	0.428324	5.61714	0.0445233	0.425205	0.780279	0.943277	5.61714	0.045523	0.363677	0.701085	0.932313
ENSMUSG00000026426	Arl8a	516.843	-0.11715	0.146069	0.157487	0.499617	110.34	-0.191008	0.315301	0.410034	0.785324	110.34	-0.110316	0.283463	0.565408	0.874928
ENSMUSG00000087721		12.6266	-0.211747	0.35404	0.0946777	0.372087
ENSMUSG00000085311	Gm15445	7.03983	-0.356113	0.563433	0.0398621	0.215801	1.51417	-0.00610333	0.443449	0.951776		1.51417	-0.0290232	0.37564	0.688243
ENSMUSG00000026424	Gpr37l1	5.65476	-0.0513726	0.271465	0.573906	0.872835	2.9903	0.295999	0.588561	0.0295908	0.212112	2.9903	0.00696866	0.371228	0.919177	0.981908
ENSMUSG00000079139	Gm4204	275.654	-0.039551	0.134567	0.594608	0.88066	240.529	0.227822	0.264967	0.296562	0.698134	240.529	0.111807	0.24282	0.554478	0.869237
ENSMUSG00000097680	Gm26642	18.4296	0.0848995	0.212061	0.3411	0.719179	2.93541	-0.163766	0.477827	0.211955	0.610871	2.93541	-0.193273	0.449263	0.0243586	0.197806
ENSMUSG00000003051	Elf3	1220.46	-0.259894	0.205346	0.0208021	0.139776	588.688	-0.661994	0.333527	0.0116789	0.116427	588.688	-0.472904	0.324172	0.0404597	0.264597
ENSMUSG00000041926	Rnpep	803.776	0.0657929	0.0973034	0.288301	0.669436	300.349	0.144271	0.287087	0.524373	0.845387	300.349	0.306926	0.305757	0.153451	0.525398
ENSMUSG00000062580	Timm17a	2311.03	-0.00573265	0.105676	0.930171	0.985175	2928.29	1.24019	0.338719	2.71848e-05	0.000953532	2928.29	1.11398	0.342684	0.000102581	0.00380206
ENSMUSG00000048096	Lmod1	17.4803	0.919447	0.620222	0.00215621	0.0256834	2.07632	0.0899553	0.44078	0.544042	0.853745	2.07632	0.123678	0.391932	0.258749
ENSMUSG00000041889	Shisa4	32.3195	0.108096	0.198514	0.232584	0.609458	14.1676	0.110425	0.378844	0.618033	0.88956	14.1676	0.117983	0.340744	0.507989	0.844698
ENSMUSG00000041879	Ipo9	4145.55	-0.0338487	0.104174	0.602271	0.882953	627.69	-0.122447	0.258137	0.562892	0.864725	627.69	-0.0317378	0.238718	0.862838	0.971251
ENSMUSG00000100620	Gm28277	7.6856	-0.0643401	0.273628	0.489198	0.828393	3.10975	0.0451745	0.436022	0.740993	0.931856	3.10975	-0.0545255	0.374325	0.555628	0.87011
ENSMUSG00000009418	Nav1	737.796	-0.0156501	0.207578	0.84991	0.964813	131.067	-0.199493	0.289951	0.376506	0.762471	131.067	-0.191774	0.277504	0.334172	0.733828
ENSMUSG00000102474	RP23-2M16.4	3.94694	0.0444437	0.310605	0.630592	0.894859	1.80988	-0.0702507	0.448851	0.53799	0.850821	1.80988	-0.00259893	0.371555	0.969564
ENSMUSG00000104524	RP24-331B5.1	9.20632	-0.0358635	0.253953	0.685386	0.916826	3.86067	-0.235993	0.504295	0.158001	0.535792	3.86067	-0.271316	0.51211	0.0308024	0.227145
ENSMUSG00000054412	Gm4793	8.32015	-0.0599985	0.271081	0.515666	0.842916	1.60016	-0.0697642	0.460232	0.184489		1.60016	-0.0495365	0.383324	0.306883
ENSMUSG00000026421	Csrp1	1859.92	-0.0967478	0.12468	0.197924	0.564573	99.1813	-0.370085	0.391798	0.150405	0.521955	99.1813	-0.474354	0.442531	0.0562536	0.31767
ENSMUSG00000041801	Phlda3	1372.87	-0.0484295	0.0973979	0.433837	0.793622	423.346	-0.0701205	0.295575	0.750831	0.935545	423.346	0.0971119	0.275911	0.618301	0.898966
ENSMUSG00000026418	Tnni1	90.2725	-0.0969952	0.168928	0.25391	0.633752	20.7502	0.0807848	0.363579	0.722668	0.926159	20.7502	-0.271645	0.411839	0.172705	0.555235
ENSMUSG00000041782	Lad1	219.39	-0.218802	0.15971	0.0247543	0.15726	34.1541	-0.965398	0.658494	0.011597	0.115999	34.1541	-0.938729	0.726021	0.0091137	0.105516
ENSMUSG00000026414	Tnnt2	12.6539	0.343128	0.442332	0.0352631	0.198359	3.28637	0.366984	0.612326	0.071779	0.358063	3.28637	0.236336	0.461148	0.0785791	0.380918
ENSMUSG00000026413		2.52695	0.0898673	0.39366	0.358267	0.733277
ENSMUSG00000026411	Tmem9	517.057	-0.00528575	0.100311	0.933421	0.985923	159.154	-0.595316	0.396317	0.0343256	0.232753	159.154	-0.546125	0.405951	0.0334531	0.237575
ENSMUSG00000026407	Cacna1s	133.684	1.98993	0.197396	4.54421e-25	2.63164e-22	0.961619	-0.0251209	0.452377	0.785586		0.961619	0.0284392	0.379263	0.583698
ENSMUSG00000102717		3.56179	0.338941	0.615001	0.0417253	0.223101
ENSMUSG00000086264		6.36704	-0.265963	0.51049	0.0716383	0.314693
ENSMUSG00000041642	Kif21b	477.8	-0.281265	0.223706	0.0180914	0.126812	24.8735	0.451727	0.450792	0.103878	0.438401	24.8735	0.248919	0.365991	0.226567	0.625729
ENSMUSG00000087230		6.25673	0.239899	0.482074	0.087172	0.354148
ENSMUSG00000041605	5730559C18Rik	197.619	0.072706	0.151506	0.361898	0.736901	37.9126	-1.01658	0.658765	0.00912324	0.0972407	37.9126	-0.757345	0.688508	0.0180654	0.164395
ENSMUSG00000097433	Gm26781	4.98433	0.061352	0.308243	0.51686	0.843342	0.999805	-0.0574857	0.454363	0.520237		0.999805	-0.0167822	0.376599	0.645093
ENSMUSG00000041570	Camsap2	2299.76	0.0577706	0.0819606	0.275255	0.656741	139.83	-0.10218	0.348007	0.652404	0.903605	139.83	-0.267171	0.378042	0.194645	0.586281
ENSMUSG00000097403	9230116N13Rik	17.913	-0.134447	0.271676	0.193997	0.559322	6.43256	-0.0963801	0.426095	0.576224	0.871956	6.43256	-0.12778	0.383431	0.334844	0.734289
ENSMUSG00000026404	Ddx59	728.514	-0.0426374	0.104876	0.513933	0.842232	139.697	0.16431	0.246937	0.432859	0.796821	139.697	0.365013	0.264416	0.0768755	0.376247
ENSMUSG00000041498	Kif14	1570.33	0.0343154	0.114175	0.617543	0.889279	136.098	-0.240968	0.281329	0.280704	0.685023	136.098	-0.310115	0.288967	0.138219	0.500992
ENSMUSG00000099337	Gm29486	3.54021	0.127149	0.399708	0.242112	0.620919	2.60533	-0.0381404	0.432695	0.786356	0.944001	2.60533	-0.0635287	0.37442	0.51238
ENSMUSG00000101413		1.5793	-0.0358381	0.36635	0.68362
ENSMUSG00000104414		2.79671	0.0298824	0.327572	0.741467	0.93541
ENSMUSG00000104509	RP24-68C1.4	19.1309	0.172002	0.335524	0.141337	0.471623	8.00443	-0.125182	0.430822	0.48413	0.823817	8.00443	-0.266875	0.486784	0.0675188	0.350851
ENSMUSG00000104366	RP24-68C1.5	16.8721	0.111715	0.285343	0.269261	0.649467	4.77775	0.0538819	0.439738	0.675425	0.911451	4.77775	0.131502	0.402007	0.164103	0.542037
ENSMUSG00000097229	Gm26598	93.637	0.0226432	0.130227	0.755726	0.939185	25.7834	3.51807	0.790178	3.47802e-07	2.17417e-05	25.7834	2.65186	0.827248	4.88736e-05	0.00199702
ENSMUSG00000041483	Zfp281	3708.11	0.0221063	0.0833054	0.686215	0.916826	420.023	0.0346062	0.244406	0.867529	0.968312	420.023	-0.170059	0.242712	0.368857	0.758682
ENSMUSG00000097113	Gm19705	126.361	0.197143	0.188154	0.0506992	0.25383	77.6638	0.164334	0.326154	0.486654	0.825443	77.6638	0.120362	0.296245	0.53843	0.861048
ENSMUSG00000097448	Gm16880	47.149	0.474825	0.337271	0.00558117	0.0538053	33.2395	-0.259096	0.396597	0.289454	0.693031	33.2395	-0.167812	0.341474	0.379311	0.768677
ENSMUSG00000103953		37.7069	0.0421191	0.193281	0.609706	0.885815
ENSMUSG00000026398	Nr5a2	2814.82	-0.0017954	0.0685004	0.968994	0.992992	205.564	-0.531542	0.256895	0.0146238	0.134788	205.564	-0.238364	0.231769	0.200988	0.593335
ENSMUSG00000026393	Nek7	1034.27	-0.106619	0.118949	0.1489	0.485091	113.589	-0.295513	0.205688	0.105714	0.442211	113.589	-0.419372	0.214663	0.0206328	0.178913
ENSMUSG00000099510		2.93855	0.0405922	0.328505	0.658339	0.905745
ENSMUSG00000102651	RP23-209N14.3	3.60081	-0.0455663	0.329581	0.622085	0.890385	1.14536	0.0246622	0.449256	0.70127		1.14536	0.0230743	0.377337	0.625939
ENSMUSG00000102448	RP23-209N14.4	10.937	-0.00136325	0.225984	0.987127	0.996732	3.65204	-0.044931	0.434034	0.745028	0.933241	3.65204	-0.0304806	0.367207	0.764853	0.947795
ENSMUSG00000019230		3.81841	-0.950134	1.154	0.00114313	0.0154212
ENSMUSG00000079283	2310009B15Rik	174.919	0.0623162	0.142298	0.419742	0.782882	49.1959	0.219259	0.322572	0.355358	0.74671	49.1959	0.130979	0.288676	0.505395	0.84344
ENSMUSG00000056268	Dennd1b	2130.28	-0.11519	0.110673	0.106145	0.399404	153.795	-0.311813	0.329806	0.197782	0.592566	153.795	-0.265412	0.314267	0.205593	0.599029
ENSMUSG00000104436	RP23-114L12.3	25.6125	-0.0248951	0.178628	0.754915	0.939033	16.2238	-0.417506	0.582989	0.0923985	0.411696	16.2238	-0.305366	0.489549	0.087023	0.400631
ENSMUSG00000104900		6.50817	-0.0762403	0.286534	0.425341	0.786846	2.43302	-0.0461164	0.446315	0.660313	0.90536	2.43302	-0.000180782	0.371982	0.995165
ENSMUSG00000102626	RP23-114L12.2	6.24759	0.140411	0.375646	0.211913	0.584062	1.07889	-0.126399	0.479458	0.0757155		1.07889	-0.087223	0.3941	0.0716739
ENSMUSG00000085361	Gm16305	4.98626	0.118657	0.371053	0.267807	0.648147	5.25012	-0.112661	0.460217	0.326662	0.724343	5.25012	-0.0581582	0.377337	0.476364	0.830532
ENSMUSG00000102157	RP23-114L12.6	20.834	-0.284388	0.378356	0.0481545	0.245085	8.82645	-0.355917	0.53959	0.126286	0.481002	8.82645	0.0206829	0.340463	0.893827	0.975905
ENSMUSG00000105936		18.5383	-0.0150992	0.196556	0.852892	0.965553	6.02393	-0.168067	0.475008	0.237084	0.639151	6.02393	-0.103268	0.386602	0.293044	0.696363
ENSMUSG00000102451	RP24-260D21.2	41.9069	-0.143675	0.227879	0.149128	0.485445	3.73429	-0.0849961	0.439914	0.549402	0.856056	3.73429	-0.0685129	0.37376	0.498598	0.840896
ENSMUSG00000102243	RP24-260D21.1	14.2423	-0.042328	0.254848	0.634811	0.897023	5.2424	-0.233153	0.50563	0.167479	0.549684	5.2424	-0.124783	0.390716	0.273375	0.680094
ENSMUSG00000033964	Zbtb41	869.236	0.0336018	0.0870766	0.55246	0.862705	103.416	-0.357123	0.366878	0.158701	0.536774	103.416	-0.277587	0.340336	0.191194	0.581532
ENSMUSG00000033952	Aspm	5037.23	-0.223918	0.0920798	0.00299027	0.033196	258.82	-0.187347	0.28791	0.404297	0.780841	258.82	-0.166432	0.272293	0.395803	0.77992
ENSMUSG00000026368		4.02504	0.28737	0.591727	0.0549667	0.267071
ENSMUSG00000089991	Gm16332	15.1829	1.98694	0.62918	1.76566e-05	0.000461304	13.3287	2.30306	0.985431	0.00106732	0.0200556	13.3287	1.50248	1.21726	0.00699273	0.0898243
ENSMUSG00000104496	RP23-13N24.1	25.5285	1.27935	0.467108	0.000109846	0.00217395	27.6222	0.0295005	0.336049	0.898337	0.975336	27.6222	0.19991	0.336432	0.321679	0.723271
ENSMUSG00000085867		2.38847	0.213718	0.531912	0.0933452	0.368517
ENSMUSG00000026365	Cfh	43.0141	1.14074	0.372676	5.60788e-05	0.00124794	62.7884	-0.531441	0.545637	0.0681864	0.349437	62.7884	-0.676147	0.680949	0.0249764	0.201556
ENSMUSG00000052726	Kcnt2	58.1939	0.0307549	0.177737	0.700483	0.92103	9.41698	0.100756	0.409146	0.610747	0.887333	9.41698	0.234357	0.425462	0.17517	0.559065
ENSMUSG00000102698	RP24-351P4.1	10.4102	-0.032912	0.244545	0.70666	0.923545	2.4429	-0.0902986	0.453333	0.441513	0.800761	2.4429	-0.0436225	0.375063	0.587331
ENSMUSG00000102368		1.81504	-0.00132393	0.360004	0.987695
ENSMUSG00000101795	Gm5835	39.7853	-0.0823417	0.202867	0.348093	0.724781	22.3478	0.145324	0.34447	0.533302	0.848446	22.3478	0.496497	0.457728	0.0535971	0.310352
ENSMUSG00000026361	Cdc73	1936.01	0.0431811	0.20347	0.606189	0.884986	285.958	-0.444361	0.371156	0.0891935	0.403683	285.958	-0.764036	0.435692	0.008917	0.10432
ENSMUSG00000033849	B3galt2	178.045	0.00716609	0.164473	0.926402	0.984126	44.4198	-0.175243	0.357528	0.451933	0.805603	44.4198	-0.866495	0.593179	0.0100074	0.112007
ENSMUSG00000089640	Gm6397	4.03593	-0.0761768	0.361049	0.431938	0.79219	2.23622	0.048184	0.449004	0.618612	0.88956	2.23622	0.0403796	0.377904	0.541456
ENSMUSG00000018196	Glrx2	594.026	0.836426	0.133381	4.36803e-11	3.62606e-09	206.232	-0.208595	0.293583	0.358924	0.748143	206.232	-0.0506562	0.259267	0.789199	0.95311
ENSMUSG00000018199	Trove2	2202.52	-0.101017	0.110854	0.150008	0.486979	88.2679	-0.716145	0.34988	0.00853856	0.0931569	88.2679	-0.487363	0.335543	0.0388945	0.258264
ENSMUSG00000018189	Uchl5	1042.39	0.00199352	0.0770997	0.969109	0.992992	774.98	-0.156475	0.283848	0.480901	0.822082	774.98	-0.0453729	0.256717	0.804577	0.955353
ENSMUSG00000100455	Gm29170	90.6007	-0.0216619	0.16224	0.7804	0.945735	8.13411	-0.291744	0.474314	0.207114	0.604923	8.13411	-0.241329	0.424072	0.166854	0.546591
ENSMUSG00000026360	Rgs2	9.82331	0.160082	0.35112	0.166694	0.515097	1.16852	-0.00724608	0.448682	0.92207		1.16852	-0.0340501	0.37979	0.546992
ENSMUSG00000100441	Gm7266	2.13763	0.0743277	0.383149	0.431518	0.791898	1.22385	-0.0389206	0.449724	0.674897		1.22385	0.0165958	0.374992	0.806609
ENSMUSG00000035131	Brinp3	33.3043	0.125007	0.224805	0.194569	0.559924	1.98484	-0.000511173	0.444745	0.991785	0.997853	1.98484	-0.039835	0.378821	0.392739
ENSMUSG00000056220	Pla2g4a	156.443	0.109852	0.175336	0.209372	0.58121	14.2801	-0.233449	0.453875	0.278614	0.682571	14.2801	-0.033118	0.342468	0.823967	0.961963
ENSMUSG00000032487	Ptgs2	68.1806	-0.0662886	0.153474	0.404416	0.770231	3.33838	-0.0890361	0.447006	0.494044	0.829115	3.33838	-0.0283062	0.368562	0.769697	0.948941
ENSMUSG00000099875	Gm15453	7.4827	-0.02583	0.250029	0.767929	0.942673	10.2015	0.0259555	0.392182	0.897692	0.975121	10.2015	0.128068	0.362361	0.424261	0.800745
ENSMUSG00000100690	Gm4322	90.5237	-0.0888464	0.177035	0.29733	0.678166	0.932983	-0.0819595	0.463934	0.326002		0.932983	0.0209454	0.376638	0.742483
ENSMUSG00000006007		1.95027	0.0320525	0.355793	0.717958	0.927792
ENSMUSG00000006010	BC003331	861.322	-0.0100233	0.118186	0.885464	0.974067	146.839	0.157139	0.329626	0.504981	0.834912	146.839	0.0729438	0.292722	0.7017	0.932513
ENSMUSG00000006005	Tpr	13527.5	-0.0285437	0.0759814	0.568594	0.870518	1089.13	-0.137791	0.186892	0.416686	0.788456	1089.13	0.0421066	0.17872	0.791409	0.95402
ENSMUSG00000006014	Prg4	48.2857	-0.0661782	0.190572	0.433068	0.793305	8.4412	-0.138805	0.410806	0.497713	0.83077	8.4412	-0.116376	0.36015	0.452007	0.815385
ENSMUSG00000066842	Hmcn1	387.771	1.17007	0.221756	1.27598e-08	7.20083e-07	5.64179	-0.147756	0.473305	0.21848	0.617462	5.64179	-0.049379	0.373378	0.581123	0.883525
ENSMUSG00000093650	Gm20631	2.76826	-0.0672352	0.339072	0.483095	0.825353	2.99741	0.108055	0.464646	0.2613	0.66666	2.99741	0.0738324	0.38543	0.274013	0.680383
ENSMUSG00000097426		1.6372	0.0723387	0.405878	0.421919
ENSMUSG00000114694		3.01422	0.0698173	0.336932	0.468874	0.815592	3.54617	0.0550177	0.45961	0.23763	0.639884	3.54617	0.0285742	0.380789	0.487221	0.834734
ENSMUSG00000100954	Gm10138	24.3576	0.022864	0.174577	0.7728	0.943495	2.82349	0.0830373	0.445932	0.519381	0.843577	2.82349	0.0272935	0.370626	0.756168
ENSMUSG00000023150	Ivns1abp	4441.24	0.151024	0.123076	0.0580292	0.276483	740.818	-0.0776098	0.242635	0.702984	0.919712	740.818	0.0591021	0.228738	0.748589	0.943188
ENSMUSG00000052748	Swt1	2022.16	-0.0065639	0.0816468	0.903365	0.978574	1214.77	0.852831	0.293893	0.000680988	0.0141123	1214.77	0.721589	0.296323	0.00265034	0.0450774
ENSMUSG00000053286	Trmt1l	699.742	0.0787453	0.0972555	0.206418	0.577154	261.123	0.227446	0.283942	0.315838	0.716157	261.123	0.269247	0.28391	0.193186	0.584048
ENSMUSG00000103928	RP24-167M10.4	34.3542	0.0245697	0.180794	0.758703	0.939935	8.19302	0.1631	0.453339	0.348553	0.742526	8.19302	0.0233541	0.359814	0.844682	0.966428
ENSMUSG00000026484	Rnf2	3672.28	-0.044202	0.103122	0.493644	0.831187	975.539	0.0650778	0.246655	0.756436	0.936554	975.539	0.172807	0.242936	0.363299	0.754381
ENSMUSG00000103238	RP24-395F2.1	79.0632	-0.0594255	0.168419	0.463243	0.811987	6.57915	0.00258235	0.421605	0.989223	0.997492	6.57915	-0.0294794	0.361889	0.799185	0.954157
ENSMUSG00000100551	Gm19503	1.31491	-0.0803799	0.408635	0.383934		0.953865	0.03496	0.452315	0.642554		0.953865	-0.0148368	0.378124	0.830077
ENSMUSG00000026483	Fam129a	682.386	-0.257715	0.137191	0.00686992	0.0624195	201.172	-1.14755	0.389659	0.000317786	0.00764825	201.172	-0.855645	0.396766	0.00317446	0.0517836
ENSMUSG00000100594	2810414N06Rik	12.7178	-0.175124	0.32857	0.13413	0.456579	5.43968	0.243613	0.518042	0.141318	0.508979	5.43968	0.10621	0.384701	0.344759	0.741974
ENSMUSG00000043019	Edem3	2439.47	0.122332	0.109842	0.0876881	0.355026	100.249	-0.162094	0.295822	0.474142	0.817408	100.249	-0.26008	0.304929	0.208044	0.602605
ENSMUSG00000032666	1700025G04Rik	342.235	0.235171	0.166469	0.0197999	0.135545	48.7553	-0.0563346	0.335694	0.802898	0.950436	48.7553	-0.401412	0.440875	0.0866078	0.399488
ENSMUSG00000014980	Tsen15	630.838	0.00757087	0.108033	0.90908	0.979775	500.313	0.216759	0.307934	0.357361	0.747553	500.313	0.191527	0.290419	0.346952	0.74378
ENSMUSG00000032649	Colgalt2	16.4795	1.00398	0.59787	0.00130506	0.0171398	37.8089	2.53265	0.783373	8.29484e-05	0.00251783	37.8089	2.70484	0.78039	3.3396e-05	0.00140221
ENSMUSG00000026482	Rgl1	137.007	0.322325	0.188281	0.0054279	0.0526827	11.7048	0.00279781	0.405782	0.990469	0.997579	11.7048	-0.037125	0.353383	0.780551	0.951521
ENSMUSG00000080950	Gm7278	10.8826	0.248262	0.399828	0.0732845	0.318588	3.02968	0.0146004	0.445631	0.878463	0.971883	3.02968	0.0112774	0.374783	0.865264	0.971642
ENSMUSG00000099868		1.42816	0.0515341	0.415981	0.519854
ENSMUSG00000055547		1.96862	0.0871175	0.416318	0.350114	0.726273
ENSMUSG00000008475	Arpc5	1675.45	-0.0141547	0.0798916	0.789203	0.947518	846.347	-0.324956	0.303946	0.166162	0.547882	846.347	-0.166603	0.26952	0.393547	0.778474
ENSMUSG00000026480	Ncf2	305.903	-0.231256	0.153268	0.0173797	0.123739	52.6173	-0.094647	0.325532	0.678091	0.912645	52.6173	-0.123154	0.304332	0.521319	0.853562
ENSMUSG00000042772	Smg7	3979.69	-0.0936492	0.130435	0.222169	0.596516	545.329	-0.0311185	0.313145	0.89136	0.97431	545.329	-0.265569	0.33966	0.214868	0.609392
ENSMUSG00000100394	Gm28791	32.5624	-0.0237964	0.230958	0.780956	0.945804	39.7086	-0.326836	0.43204	0.192793	0.586203	39.7086	-1.06245	0.685537	0.00605743	0.0812049
ENSMUSG00000100702		1.32167	-0.0601434	0.389061	0.502125
ENSMUSG00000042751	Nmnat2	563.133	0.0883513	0.109451	0.198563	0.565213	178.108	-0.491551	0.450604	0.078482	0.374912	178.108	-0.539353	0.49666	0.0414386	0.268246
ENSMUSG00000099969	Gm28960	1.8354	-0.0159387	0.33733	0.857684		13.1856	0.0135928	0.433619	0.924505	0.981917	13.1856	-0.0830277	0.382942	0.343549	0.740826
ENSMUSG00000026479	Lamc2	649.725	-0.390807	0.118515	3.72246e-05	0.000875643	154.313	-0.34698	0.38777	0.17344	0.559382	154.313	-0.190926	0.326471	0.334426	0.733906
ENSMUSG00000026478	Lamc1	8987.59	-0.146287	0.152669	0.0945425	0.371736	694.597	-0.344474	0.299734	0.140261	0.507099	694.597	-0.388347	0.309882	0.0772777	0.377374
ENSMUSG00000103818	RP24-571N3.1	31.0603	-0.080023	0.235864	0.380775	0.751448	10.6929	-0.18403	0.4127	0.393284	0.772476	10.6929	-0.285897	0.445886	0.135314	0.495177
ENSMUSG00000079138	Gm8818	14.4637	-0.0720571	0.287112	0.448529	0.802506	4.33722	0.00309792	0.431232	0.982972	0.995553	4.33722	0.069123	0.373322	0.510841	0.846877
ENSMUSG00000073538	E330020D12Rik	128.977	-0.177915	0.186241	0.0695416	0.308717	241.827	0.168922	0.337707	0.4758	0.818273	241.827	1.27714	0.48943	0.000652157	0.0154535
ENSMUSG00000042708	Shcbp1l	83.3414	0.159771	0.210364	0.108351	0.404167	7.87722	0.0964801	0.409725	0.62346	0.890944	7.87722	-0.0582111	0.353859	0.675291	0.923503
ENSMUSG00000064435	Gm25588	3.48173	0.0584587	0.343158	0.53442	0.853493	1.67388	-0.026093	0.444271	0.795575	0.94714	1.67388	-0.0926099	0.393989	0.143679
ENSMUSG00000103543	RP23-1K14.2	14.7604	0.0314578	0.215083	0.708909	0.92435	2.34494	0.155275	0.475469	0.234793	0.636306	2.34494	0.101305	0.389463	0.276773
ENSMUSG00000042699	Dhx9	8586.43	0.0846248	0.174182	0.315884	0.695695	971.442	0.223628	0.342255	0.359156	0.748389	971.442	-0.0146248	0.288893	0.935956	0.985362
ENSMUSG00000042684	Npl	347.803	0.82004	0.226741	9.60501e-06	0.00026915	154.838	3.67007	0.406764	1.34686e-20	1.21481e-17	154.838	2.92633	0.41091	7.14221e-14	3.06804e-11
ENSMUSG00000099858	Gm6652	2.70879	-0.157065	0.463826	0.165977	0.514405	4.22598	0.592851	1.1604	0.0133912	0.126695	4.22598	3.51713	1.61732	0.00100495	0.0216399
ENSMUSG00000042671	Rgs8	2.42852	0.0349122	0.381455	0.681735	0.915449	1.65555	-0.0501761	0.455512	0.487318		1.65555	-0.00198592	0.376764	0.964164
ENSMUSG00000026475		35.9166	0.458468	0.363501	0.00828691	0.0719096
ENSMUSG00000099568		1.91865	0.150636	0.469945	0.169863
ENSMUSG00000066800		53.6799	0.419512	0.325678	0.00873219	0.0748394
ENSMUSG00000100183		6.36502	0.149591	0.384337	0.193006	0.557597
ENSMUSG00000045968	Teddm2	8.04139	-0.0257321	0.252665	0.769365	0.942924	1.42146	0.0321262	0.450907	0.678395		1.42146	-0.0286957	0.379448	0.620427
ENSMUSG00000026473	Glul	3703.07	0.27867	0.151937	0.00612905	0.0576031	511.034	0.426483	0.379438	0.108321	0.447874	511.034	-0.00746684	0.283438	0.967617	0.992621
ENSMUSG00000004110	Cacna1e	6.21977	0.529911	0.745427	0.0156103	0.114744	3.01501	0.0814599	0.445379	0.526768	0.845695	3.01501	-0.042331	0.373924	0.609753	0.895285
ENSMUSG00000101880		2.48701	0.084863	0.397579	0.375351	0.746741
ENSMUSG00000096950		6.85194	0.0519351	0.266535	0.568322	0.870485
ENSMUSG00000056708	Ier5	239.804	1.01467	0.196855	2.64155e-08	1.38173e-06	13.9858	1.77951	0.771125	0.00124668	0.0226615	13.9858	0.216609	0.400143	0.226	0.624849
ENSMUSG00000026471		2.17527	0.054632	0.373827	0.546657	0.860404
ENSMUSG00000026470	Stx6	778.839	0.0703546	0.112927	0.310174	0.691186	110.542	0.0877676	0.28469	0.696897	0.917696	110.542	-0.0581854	0.264344	0.758024	0.945808
ENSMUSG00000104181		8.52145	0.0897216	0.297063	0.362256	0.737265
ENSMUSG00000033722	BC034090	136.662	0.0545458	0.140276	0.474697	0.820382	2.10136	0.0430431	0.443975	0.694773	0.917461	2.10136	-0.00465303	0.372805	0.948803
ENSMUSG00000103670		2.27364	-0.017835	0.327619	0.842176	0.963058
ENSMUSG00000026469	Xpr1	1391.71	0.271691	0.191678	0.0143565	0.107855	209.714	1.43748	0.451257	0.00012793	0.00362743	209.714	0.517853	0.424161	0.0464241	0.285859
ENSMUSG00000073535	Gm5532	1.57447	-0.0118283	0.397044	0.879131		0.660955	0.0972142	0.468327	0.236459		0.660955	0.0518915	0.383774	0.495774
ENSMUSG00000033701	Acbd6	542.317	0.0190458	0.0863781	0.736005	0.932874	168.583	0.322762	0.31178	0.179159	0.569372	168.583	0.157059	0.274328	0.428062	0.80297
ENSMUSG00000026468	Lhx4	2.54407	0.121437	0.397773	0.256896	0.636987	0.826069	0.098068	0.464468	0.306031		0.826069	0.0319138	0.37805	0.687423
ENSMUSG00000033684	Qsox1	293.142	0.397576	0.162332	0.000518945	0.0080448	16.0925	0.112086	0.382124	0.611289	0.88755	16.0925	-0.307174	0.460531	0.115324	0.459568
ENSMUSG00000102558		4.40309	0.0677373	0.307546	0.478531	0.822566
ENSMUSG00000033671	Cep350	2659.14	0.0216288	0.113212	0.751094	0.937586	121.913	-0.0496031	0.302242	0.823517	0.956947	121.913	-0.42335	0.378126	0.0733562	0.367492
ENSMUSG00000103717		1.47595	-0.116705	0.431259	0.25273
ENSMUSG00000103771		2.88284	-0.0132527	0.307302	0.882662	0.973182
ENSMUSG00000102837		2.35967	-0.0735244	0.36079	0.445305	0.800485
ENSMUSG00000102833	RP24-310B3.1	2.16879	-0.047238	0.344758	0.607782	0.885396	1.64581	-0.0390968	0.452887	0.57157		1.64581	-0.0507413	0.384334	0.221601
ENSMUSG00000026466	Tor1aip1	234.837	0.0426746	0.112575	0.532378	0.852344	141.606	0.806949	0.323117	0.002551	0.0392195	141.606	0.373155	0.294205	0.0857596	0.396777
ENSMUSG00000102964	RP24-321N12.1	16.0279	0.081661	0.268076	0.389269	0.758974	5.41079	0.195202	0.48252	0.217914	0.616624	5.41079	-0.0742226	0.376755	0.451015	0.815255
ENSMUSG00000050565	Tor1aip2	6484.29	-0.0237078	0.0757031	0.636121	0.897694	1813.72	0.66732	0.192066	0.000165241	0.00441444	1813.72	0.35021	0.185343	0.0320342	0.231723
ENSMUSG00000015484		6.6414	0.509879	0.67724	0.017958	0.12624
ENSMUSG00000060985	Tdrd5	127.232	1.12067	0.19648	1.32303e-09	8.67384e-08	18.5107	0.170629	0.427509	0.40861	0.784616	18.5107	0.150946	0.37727	0.336938	0.735851
ENSMUSG00000026602	Nphs2	1.3759	0.171818	0.531328	0.10382		0.618912	-0.0257116	0.453036	0.766091		0.618912	0.00899202	0.3777	0.875011
ENSMUSG00000026601	Axdnd1	7.60483	0.149587	0.351176	0.187635	0.548804	2.55005	0.0590414	0.447261	0.587873	0.875783	2.55005	0.0106557	0.372737	0.888748
ENSMUSG00000078193	Gm2000	63.5506	-0.0288012	0.154784	0.708641	0.92435	146.833	0.252037	0.426522	0.288119	0.692042	146.833	0.240471	0.399711	0.209211	0.603357
ENSMUSG00000026600	Soat1	3327.23	0.273321	0.0900362	0.000399009	0.0064917	188.694	0.361889	0.271551	0.105027	0.440991	188.694	0.166639	0.244319	0.386837	0.773258
ENSMUSG00000103199	RP24-228M19.3	14.4188	0.00197556	0.213342	0.981037	0.996191	2.53813	0.310778	0.624032	0.00465369	0.060291	2.53813	0.146326	0.417887	0.0616962
ENSMUSG00000101523	Csnk2a1	112.927	-0.0398252	0.123926	0.579235	0.874948	71.3782	0.176408	0.364323	0.453615	0.806424	71.3782	0.0352345	0.309507	0.847594	0.96695
ENSMUSG00000026596	Abl2	3344.69	0.0509045	0.145193	0.5083	0.839163	198.92	-0.333236	0.305851	0.157664	0.535327	198.92	-0.605543	0.353086	0.0160176	0.152567
ENSMUSG00000104293	RP23-363M8.2	48.4671	0.0343165	0.19537	0.676323	0.912567	5.83541	-0.227953	0.498268	0.17852	0.568007	5.83541	-0.201916	0.440772	0.0769313	0.376248
ENSMUSG00000060519	Tor3a	298.751	-0.210797	0.14545	0.0233231	0.15114	68.4495	-0.628967	0.301006	0.0104429	0.107248	68.4495	-0.329765	0.272644	0.108605	0.446273
ENSMUSG00000033557	Fam20b	1197.52	0.0134289	0.0759755	0.790853	0.947518	212.711	0.494303	0.366816	0.0649569	0.340747	212.711	0.0668842	0.276083	0.728464	0.938577
ENSMUSG00000046057		1.70838	-0.0523864	0.367579	0.564588
ENSMUSG00000026594	Ralgps2	1531.46	-0.0678153	0.110932	0.321604	0.700051	318.088	-0.267973	0.234089	0.181906	0.573676	318.088	-0.253629	0.230023	0.171168	0.552625
ENSMUSG00000101964	Gm28693	8.34448	-0.0128067	0.243037	0.88212	0.972926	3.27341	-0.0481773	0.443224	0.679857	0.912645	3.27341	-0.0181047	0.371391	0.826498	0.963468
ENSMUSG00000033544	Angptl1	9.99963	0.0282229	0.246346	0.746566	0.936522	5.8003	-0.238775	0.477808	0.231533	0.632185	5.8003	-0.151624	0.387254	0.300541	0.703642
ENSMUSG00000103303	RP24-444I15.1	7.35915	0.0307683	0.274756	0.731695	0.93168	5.37233	0.253945	0.481315	0.222673	0.621771	5.37233	0.0685053	0.358568	0.615909	0.897704
ENSMUSG00000102960	RP24-444I15.4	14.346	-0.102544	0.267608	0.294879	0.675934	3.10092	0.0356973	0.443267	0.747634	0.934514	3.10092	-0.040936	0.376816	0.56345	0.873541
ENSMUSG00000101905		8.32439	0.309686	0.503703	0.0523124	0.259038
ENSMUSG00000103325		1.73681	-0.0318172	0.362695	0.717179
ENSMUSG00000026592		4.63366	0.244322	0.50064	0.0837224	0.346147
ENSMUSG00000109913		6.66596	0.132176	0.35706	0.229571	0.606387	0.761584	0.0678131	0.462274	0.254981		0.761584	0.0238103	0.380471	0.794271
ENSMUSG00000070565	Rasal2	724.276	0.0585765	0.113831	0.397605	0.764441	81.9936	0.438159	0.4045	0.106617	0.444408	81.9936	-0.253384	0.35055	0.220638	0.617292
ENSMUSG00000102326	RP24-227F14.5	3.31735	0.0878682	0.367627	0.376807	0.748293	18.5168	0.257356	0.425538	0.282439	0.686824	18.5168	-0.364676	0.509764	0.0862622	0.398285
ENSMUSG00000102391	RP24-227F14.4	2.43322	0.161403	0.484996	0.149051	0.485341	2.12482	0.190622	0.502147	0.113863	0.459361	2.12482	0.0985398	0.391717	0.225799
ENSMUSG00000087632	Gm6058	3.05872	0.134231	0.4038	0.224913	0.600501	1.6378	0.0460832	0.452624	0.557768		1.6378	-0.0392692	0.381384	0.490158
ENSMUSG00000103808	RP24-227F14.1	18.4383	0.0416308	0.214798	0.624008	0.891567	17.8421	0.459558	0.483247	0.1008	0.431958	17.8421	-0.127082	0.338075	0.479692	0.83215
ENSMUSG00000049881	2810025M15Rik	1306.04	0.0186314	0.125771	0.794931	0.948787	800.23	0.942423	0.278753	0.000128445	0.00363659	800.23	0.389876	0.259949	0.0575012	0.321427
ENSMUSG00000033488	BC026585	208.062	0.00680269	0.0990872	0.91367	0.980618	89.7767	1.55713	0.733209	0.00209288	0.0337086	89.7767	2.05148	0.711022	0.000193895	0.0061289
ENSMUSG00000026589	Sec16b	5.1502	0.380688	0.65575	0.032045	0.186823	3.6905	0.0287012	0.432596	0.840852	0.960118	3.6905	0.221631	0.461751	0.0611119	0.332082
ENSMUSG00000004031	Brinp2	19.0529	0.250383	0.35469	0.0625836	0.289379	0.852828	-0.0475051	0.454144	0.408722		0.852828	-0.0188556	0.377039	0.764123
ENSMUSG00000026587	Astn1	8.09791	2.17262	0.839439	3.46373e-05	0.000826774	2.04536	0.0335175	0.450476	0.679806	0.912645	2.04536	-0.0391695	0.38114	0.462503
ENSMUSG00000073530	Pappa2	2.61715	0.191702	0.500409	0.117892	0.423996	1.34271	0.0679071	0.456938	0.408702		1.34271	0.0142876	0.377229	0.926358
ENSMUSG00000040782	Rfwd2	2095.17	-0.0215001	0.0876257	0.706616	0.923545	237.879	0.305107	0.272924	0.172334	0.557987	237.879	-0.26639	0.267751	0.185165	0.573077
ENSMUSG00000103572	RP23-375F6.4	54.9187	-0.0421813	0.152196	0.586126	0.878419	2.78824	-0.00892805	0.438972	0.935869	0.984688	2.78824	-0.0432244	0.375229	0.581127
ENSMUSG00000103186	RP23-145H3.4	8.47605	-0.0906023	0.2709	0.347334	0.724235	2.84296	0.0815933	0.448711	0.499315	0.831358	2.84296	-0.0273599	0.373096	0.730979
ENSMUSG00000089536		1.7555	0.0650912	0.404144	0.459578
ENSMUSG00000090394		5.20387	0.191383	0.416431	0.129589	0.447534
ENSMUSG00000058267	Mrps14	1040.9	-0.0938841	0.131446	0.222883	0.597337	1396.57	0.0190518	0.265006	0.928364	0.982549	1396.57	0.00854614	0.247403	0.957074	0.990539
ENSMUSG00000014226	Cacybp	4636.3	-0.0538263	0.124642	0.458412	0.808251	5252.62	-0.214261	0.284043	0.338383	0.73361	5252.62	-0.00587493	0.250741	0.976263	0.995135
ENSMUSG00000103006	RP23-71J17.5	49.0852	-0.0107466	0.144038	0.886044	0.974156	4.3804	0.0262905	0.405652	0.888882	0.974098	4.3804	0.111791	0.366959	0.445372	0.81093
ENSMUSG00000026721	Rabgap1l	662.482	-0.0110298	0.0859697	0.844914	0.963451	35.2776	-0.391363	0.377206	0.128864	0.486219	35.2776	-0.263121	0.335857	0.210172	0.604052
ENSMUSG00000104302		2.449	0.0608296	0.378736	0.505971	0.837626
ENSMUSG00000103522		1.95463	-0.0898969	0.420886	0.335521	0.714988
ENSMUSG00000103693	RP24-540L1.2	4.66168	0.073253	0.334048	0.450412	0.80436	1.6501	-0.0145537	0.4495	0.842813		1.6501	-0.0433513	0.382316	0.370134
ENSMUSG00000104026		5.07681	-0.0650239	0.353861	0.493037	0.830595
ENSMUSG00000118401		3.31241	0.0246713	0.331341	0.783789	0.94624
ENSMUSG00000104020	RP24-546N2.4	4.66822	0.0288653	0.322085	0.750156	0.93704	0.792844	-0.0674499	0.462074	0.255649		0.792844	-0.0294801	0.380064	0.545677
ENSMUSG00000103391		2.32715	-0.0402867	0.362941	0.651376	0.903222
ENSMUSG00000103432	RP24-546N2.2	5.8152	-0.0417905	0.285967	0.647198	0.902112	2.73191	-0.0843045	0.442376	0.548692	0.855945	2.73191	0.0195059	0.365066	0.857551
ENSMUSG00000102172		2.59579	-0.126395	0.457495	0.211624	0.583664
ENSMUSG00000103200		3.41608	-0.041363	0.322125	0.653111	0.903895
ENSMUSG00000103632	RP24-400M20.2	2.83218	-0.155149	0.425796	0.181117	0.539199	0.926598	-0.0600511	0.457136	0.448292		0.926598	-0.016483	0.377032	0.777097
ENSMUSG00000104053	RP24-400M20.1	2.89584	0.0239372	0.319674	0.790898	0.947518	4.57028	-0.175616	0.48739	0.169381	0.553145	4.57028	-0.0914459	0.385459	0.307661	0.709899
ENSMUSG00000040423	Rc3h1	2056.65	0.00473801	0.128364	0.9476	0.988288	230.265	-0.27637	0.391159	0.260211	0.665532	230.265	-0.248249	0.368294	0.220573	0.617292
ENSMUSG00000103343	RP24-188H2.3	32.7265	-0.138815	0.233085	0.163121	0.50873	1.07685	0.00623233	0.44604	0.946449		1.07685	0.0131204	0.37521	0.840939
ENSMUSG00000103846		11.1622	0.0195837	0.234057	0.819273	0.955317
ENSMUSG00000103739	RP24-188H2.5	56.8064	-0.02955	0.163786	0.705682	0.923183	1.64978	-0.0423599	0.44519	0.692282		1.64978	-0.044889	0.377158	0.545816
ENSMUSG00000026715	Serpinc1	19.0005	0.229271	0.346485	0.0764134	0.326874	12.8737	3.48765	0.959751	1.56424e-05	0.000600978	12.8737	2.35109	1.04861	0.00105386	0.022552
ENSMUSG00000103222	RP24-188H2.6	2.25834	0.0100244	0.340182	0.909669	0.979898	0.582977	5.35219e-05	0.452454	0.917399		0.582977	-0.00245945	0.378688	0.947956
ENSMUSG00000043467	Zbtb37	703.734	-0.0252867	0.125453	0.724549	0.929936	95.6786	0.295645	0.359205	0.235168	0.636877	95.6786	-0.00196356	0.289535	0.989686	0.997634
ENSMUSG00000104016	RP24-297J20.5	13.8435	-0.170204	0.330573	0.142748	0.473808	1.5988	0.107787	0.468499	0.19203		1.5988	0.011308	0.376776	0.918425
ENSMUSG00000053332	Gas5	5473.89	-0.298538	0.212855	0.0121013	0.0943702	4993.6	0.302864	0.244097	0.144267	0.512927	4993.6	0.0809476	0.219587	0.642665	0.908712
ENSMUSG00000026709	Dars2	1387.55	-0.0543123	0.114507	0.433588	0.793622	207.137	0.102569	0.299633	0.651894	0.903605	207.137	0.109354	0.279459	0.573019	0.877945
ENSMUSG00000026708	Cenpl	276.518	-0.0366597	0.150017	0.633236	0.896535	219.411	-0.0365129	0.260026	0.862432	0.966759	219.411	0.105234	0.247798	0.581838	0.883525
ENSMUSG00000026705	Klhl20	901.946	-0.051592	0.0892006	0.368933	0.740634	97.5844	0.277322	0.237534	0.17393	0.559988	97.5844	0.0909194	0.217426	0.613659	0.896979
ENSMUSG00000044835	Ankrd45	155.607	1.19427	0.187387	1.9965e-11	1.73431e-09	55.8015	-0.856061	0.531734	0.0130132	0.124314	55.8015	-0.25941	0.362272	0.212744	0.607378
ENSMUSG00000049160	4930469G21Rik	7.70394	0.0617991	0.254362	0.497164	0.833019	2.47803	-0.0668547	0.440785	0.612447	0.888093	2.47803	-0.0086814	0.367238	0.92527
ENSMUSG00000102817	RP23-16I21.1	12.3804	0.383878	0.553767	0.0332767	0.191027	1.31646	0.0259971	0.439654	0.8318		1.31646	-0.0751182	0.383934	0.369457
ENSMUSG00000026701	Prdx6	4111.69	0.769515	0.166319	1.63771e-07	7.01304e-06	4710.32	-0.149926	0.295248	0.506618	0.835658	4710.32	-0.0990154	0.270878	0.604435	0.893547
ENSMUSG00000040323	Gm15429	3.98674	0.0620645	0.314052	0.513198	0.841643	2.30633	-0.046252	0.432417	0.739866	0.93173	2.30633	-0.0731669	0.375584	0.460166
ENSMUSG00000000817		1.26362	0.0738865	0.419483	0.397569
ENSMUSG00000103625	RP24-75E15.5	8.08454	0.0838655	0.276638	0.382054	0.752689	1.14751	-0.0584361	0.455005	0.470379		1.14751	-0.0609816	0.385837	0.246626
ENSMUSG00000040297	Suco	2473.07	0.0308387	0.0779959	0.547259	0.860415	141.339	-0.108917	0.305812	0.631088	0.894317	141.339	-0.5116	0.400794	0.0418936	0.270356
ENSMUSG00000102254	RP24-75E15.4	3.48495	-0.187667	0.467656	0.131197	0.451103	0.881823	-0.00297764	0.449507	0.917577		0.881823	0.0271849	0.37835	0.537689
ENSMUSG00000103158		4.68078	-0.150729	0.410743	0.19073	0.553662
ENSMUSG00000026698	Pigc	305.97	-0.246359	0.190193	0.0219961	0.145186	76.972	-0.122376	0.295611	0.588106	0.875802	76.972	-0.169543	0.28604	0.39473	0.77944
ENSMUSG00000040265	Dnm3	3.98309	0.0543506	0.305258	0.561351	0.866739	1.43134	0.179859	0.500312	0.0916876		1.43134	0.0652711	0.382627	0.442474
ENSMUSG00000026694	Mettl13	887.899	0.0099428	0.0785406	0.849048	0.964793	83.379	-0.00215823	0.315466	0.990419	0.997579	83.379	0.0916465	0.293683	0.633769	0.906355
ENSMUSG00000026696	Vamp4	354.421	-0.0217182	0.103692	0.737078	0.933359	132.622	-0.195796	0.313397	0.400422	0.777479	132.622	-0.0105498	0.271811	0.954323	0.989587
ENSMUSG00000040225	Prrc2c	12753.2	0.0193545	0.184126	0.809176	0.952421	1662.64	-0.0744011	0.284505	0.739645	0.93173	1662.64	-0.358748	0.326336	0.104976	0.439228
ENSMUSG00000098259		13.229	-0.139245	0.29354	0.191856	0.555735
ENSMUSG00000026692	Fmo4	3.42641	0.0508166	0.322215	0.58605	0.878419	0.541257	0.0509436	0.459074	0.410274		0.541257	0.0257606	0.380963	0.71427
ENSMUSG00000040181	Fmo1	3.87872	0.0759495	0.334042	0.436333	0.795452	468.071	9.20079	0.634425	2.40738e-44	2.27991e-40	468.071	7.76543	0.635688	2.99531e-32	2.50902e-28
ENSMUSG00000040124	Gorab	419.662	-0.148083	0.137851	0.0777382	0.330911	90.1433	0.0536139	0.300109	0.81357	0.953161	90.1433	0.128836	0.28537	0.512283	0.847967
ENSMUSG00000088951		3.41951	-0.242838	0.539131	0.0791769	0.334576
ENSMUSG00000102117	Rpsa-ps1	3.02609	-0.0385713	0.342801	0.671094	0.911446	4.10436	-0.0265612	0.424621	0.863353	0.96699	4.10436	-0.0296529	0.363664	0.786024	0.952288
ENSMUSG00000026585	Kifap3	1690.85	-0.0623387	0.0828058	0.243945	0.623133	331.719	0.0587677	0.199827	0.745223	0.933241	331.719	0.0671139	0.192639	0.687847	0.92909
ENSMUSG00000026584	Scyl3	737.962	-0.0202569	0.0796418	0.70037	0.92103	124.341	0.102086	0.276951	0.644358	0.90031	124.341	0.00367422	0.254788	0.984864	0.996963
ENSMUSG00000041406	BC055324	2549.27	0.0124433	0.0874961	0.827726	0.95843	610.76	0.643951	0.301223	0.00921008	0.0979235	610.76	0.980245	0.313442	0.000204948	0.00640578
ENSMUSG00000041396	Mettl18	368.86	-0.00055607	0.11208	0.993444	0.997957	103.992	-0.029745	0.268982	0.889572	0.97431	103.992	0.299126	0.288671	0.15586	0.530394
ENSMUSG00000026581	Sell	1.65892	0.085731	0.435384	0.328932		1.70492	0.124289	0.469395	0.277539	0.68178	1.70492	0.132932	0.409988	0.0790502
ENSMUSG00000026580	Selp	1.35735	0.0453445	0.377565	0.606247		0.964946	0.00170575	0.447841	0.984755		0.964946	0.0344705	0.37821	0.587142
ENSMUSG00000026579	F5	19.3035	0.2131	0.321609	0.0842409	0.34764	1.24099	0.159947	0.4911	0.130617		1.24099	0.125087	0.40819	0.0641984
ENSMUSG00000040918	Slc19a2	1909.14	0.00849043	0.0790988	0.871734	0.971054	370.923	-0.000105177	0.268301	0.995349	0.999111	370.923	0.347947	0.298577	0.108418	0.445952
ENSMUSG00000026578	Ccdc181	193.072	-0.208714	0.205929	0.048314	0.245662	44.3482	0.134345	0.280786	0.548636	0.855945	44.3482	-0.0315589	0.257152	0.86717	0.971642
ENSMUSG00000026577	Blzf1	792.618	-0.0767398	0.102499	0.237174	0.614369	252.124	0.264315	0.224519	0.178149	0.567208	252.124	0.186196	0.214586	0.298729	0.701833
ENSMUSG00000026575	Nme7	1310.7	-0.103018	0.143156	0.202477	0.570931	409.049	-0.158466	0.272472	0.461704	0.810067	409.049	0.0216335	0.246714	0.909412	0.980405
ENSMUSG00000103493	RP24-73O16.3	18.2505	-0.0965024	0.269759	0.32072	0.699317	1.05404	-0.0102514	0.451889	0.892954		1.05404	0.00944157	0.378293	0.827901
ENSMUSG00000026576	Atp1b1	1577.6	-0.0843283	0.14112	0.284023	0.664705	351.357	-0.917837	0.280927	0.000171728	0.00456839	351.357	-0.452685	0.267616	0.030366	0.2248
ENSMUSG00000104011	RP24-272N10.3	7.03481	-0.00163985	0.242789	0.984818	0.996627	2.81907	-0.056526	0.42999	0.708011	0.921738	2.81907	-0.0903955	0.378782	0.395487
ENSMUSG00000103226		2.29054	0.0209287	0.387334	0.797451	0.949414
ENSMUSG00000097281	Gm26685	9.94703	-0.0506347	0.243466	0.568456	0.870507	6.51638	-0.0614363	0.422793	0.715412	0.924065	6.51638	-0.0898453	0.372477	0.468937	0.82544
ENSMUSG00000102389		5.77122	-0.0217973	0.276626	0.807138	0.951646
ENSMUSG00000040848	Sft2d2	401.784	-0.166683	0.125057	0.042258	0.224468	71.9422	-0.247914	0.315273	0.294768	0.696286	71.9422	-0.161711	0.285879	0.413866	0.793353
ENSMUSG00000040843	Tiprl	1044.49	-0.0211811	0.0856487	0.705518	0.923183	1235.5	1.25404	0.287979	1.45903e-06	7.55065e-05	1235.5	0.824884	0.290851	0.000636515	0.0151471
ENSMUSG00000102302	RP23-187M7.5	52.9212	0.00645933	0.206144	0.937473	0.986663	22.2379	2.61498	0.89526	0.000167503	0.00446227	22.2379	0.58147	0.949824	0.0228322	0.190075
ENSMUSG00000040836	Gpr161	224.696	1.23785	0.18024	6.61227e-13	7.21212e-11	93.5355	4.205	0.578868	3.13448e-14	8.9773e-12	93.5355	3.18364	0.589665	4.31761e-09	6.1299e-07
ENSMUSG00000026571	Dcaf6	634.204	0.0370782	0.0820911	0.488528	0.82805	37.4637	-0.0972146	0.354015	0.667331	0.907584	37.4637	-0.565986	0.577318	0.0377647	0.253881
ENSMUSG00000104427	RP23-294I9.3	2.30467	0.0601884	0.376992	0.510839	0.840672	1.49327	-0.0364746	0.453747	0.553166		1.49327	-0.0479904	0.384732	0.156614
ENSMUSG00000089299		1.59907	0.139687	0.480438	0.171808
ENSMUSG00000102401	RP24-323I23.1	27.3884	0.0517318	0.220696	0.549573	0.861952	0.882265	-0.00456033	0.443702	0.964826		0.882265	-0.0109991	0.373931	0.894299
ENSMUSG00000026568	Mpc2	400.186	-0.0508233	0.1181	0.470849	0.817274	190.498	0.41951	0.382901	0.115549	0.46229	190.498	0.260089	0.334752	0.221937	0.619224
ENSMUSG00000103763	RP24-323I23.2	7.93284	-0.00781442	0.256428	0.928776	0.984899	2.06499	-0.136533	0.479925	0.123848	0.477333	2.06499	-0.0473761	0.378488	0.486104
ENSMUSG00000026567	Adcy10	19.9829	0.300722	0.41549	0.0468589	0.240656	3.49403	0.139411	0.469387	0.26087	0.666281	3.49403	0.108397	0.393886	0.20193	0.594521
ENSMUSG00000104474		1.91392	0.0299524	0.352011	0.736124
ENSMUSG00000026566	Mpzl1	800.275	0.0147673	0.153563	0.846724	0.963807	672.176	-0.309833	0.256976	0.146637	0.516596	672.176	-0.0991739	0.22929	0.587484	0.886198
ENSMUSG00000103098	RP23-469D21.5	4.0275	-0.107012	0.385949	0.301503	0.683242	1.20771	-0.109705	0.473274	0.107875		1.20771	-0.040423	0.379465	0.501226
ENSMUSG00000104517		1.90128	0.168085	0.491511	0.13939
ENSMUSG00000040723	Rcsd1	27.9611	1.28559	0.394652	3.10028e-05	0.000755591	9.99417	0.221684	0.48584	0.223082	0.621913	9.99417	0.150741	0.397821	0.249032	0.651993
ENSMUSG00000040713	Creg1	608.265	0.0494538	0.117199	0.480744	0.823751	203.509	0.385174	0.309683	0.111213	0.453348	203.509	0.270851	0.288509	0.193979	0.585117
ENSMUSG00000104306		1.79672	0.0596886	0.373796	0.515724
ENSMUSG00000089829		8.97433	0.0385362	0.23868	0.658795	0.906008
ENSMUSG00000005763	Cd247	12.0488	0.0213902	0.241352	0.80471	0.951058	1.54198	-0.0966651	0.460404	0.227112		1.54198	-0.0980507	0.394924	0.142067
ENSMUSG00000026565	Pou2f1	2765.89	-0.0832653	0.158695	0.309524	0.690439	236.156	-0.64048	0.377041	0.0215905	0.17396	236.156	-0.746213	0.400541	0.00762121	0.094695
ENSMUSG00000099008	Gm17976	13.9209	-0.0521007	0.220011	0.546533	0.860404	2.82666	-0.177564	0.492509	0.125386	0.479543	2.82666	-0.078409	0.382839	0.322718
ENSMUSG00000026564	Dusp27	429.644	-0.642591	0.183399	8.6321e-06	0.000246141	51.7173	-0.902589	0.77126	0.017361	0.151328	51.7173	-0.139751	0.353734	0.415658	0.794742
ENSMUSG00000000544	Gpa33	824.028	-0.970633	0.116715	1.68704e-17	3.41948e-15	73.2629	-0.639768	0.400632	0.0251839	0.192397	73.2629	-0.306117	0.334493	0.155298	0.529019
ENSMUSG00000040629	Mael	259.572	1.14868	0.224972	3.10928e-08	1.59551e-06	51.0634	0.276146	0.362842	0.266681	0.671972	51.0634	0.550346	0.456597	0.0416427	0.269294
ENSMUSG00000040612		25.894	0.192377	0.296411	0.0988639	0.382482
ENSMUSG00000103400		3.37494	-0.299819	0.590058	0.0525519	0.259907
ENSMUSG00000026563	Tada1	74.7228	-0.324923	0.25569	0.0134994	0.102737	19.2487	-0.0112933	0.353685	0.958595	0.99044	19.2487	0.18109	0.346881	0.349958	0.746252
ENSMUSG00000040596	Pogk	228.095	0.121612	0.132338	0.126918	0.442079	1.95231	-0.104639	0.462581	0.203797	0.600253	1.95231	-0.0440263	0.376088	0.574376
ENSMUSG00000084093	Gm16418	2.42429	-0.00372005	0.323465	0.966738	0.992819	4.13647	0.0349691	0.417385	0.841701	0.960335	4.13647	-0.151418	0.4002	0.239331	0.639735
ENSMUSG00000051081	Gm4847	1.38957	0.14231	0.518315	0.115883		0.409323	0.013833	0.452609	0.862671		0.409323	-0.0101904	0.379215	0.877814
ENSMUSG00000086925	Gm6286	2.08465	0.0143255	0.369943	0.865687	0.969528	1.43655	-0.0444118	0.450102	0.503669		1.43655	-0.00124213	0.373918	0.983344
ENSMUSG00000097823		1.80985	-0.0560717	0.374724	0.537099
ENSMUSG00000060568	Fam78b	7.5929	0.447582	0.603923	0.0239049	0.153373	3.84854	-0.136107	0.476079	0.154774	0.529437	3.84854	-0.11166	0.400728	0.100343	0.431481
ENSMUSG00000026558	Uck2	10487.7	-0.0145032	0.088465	0.801413	0.950099	1075.21	0.121879	0.234206	0.546624	0.855357	1075.21	0.161925	0.228254	0.372566	0.762902
ENSMUSG00000103139	RP23-79H24.3	19.4401	-0.157964	0.321165	0.161646	0.506012	9.62551	-0.180051	0.403082	0.416214	0.788211	9.62551	-0.570406	0.736033	0.0318997	0.231449
ENSMUSG00000052428	Tmco1	1201.16	-0.0861871	0.136163	0.267274	0.647327	877.03	0.15808	0.284038	0.48317	0.823709	877.03	0.209119	0.279048	0.301372	0.704168
ENSMUSG00000088246		1.08408	-0.170411	0.558228	0.0681126
ENSMUSG00000026687	Aldh9a1	2019.21	0.0720973	0.100479	0.258105	0.637984	451.398	0.0300588	0.245945	0.885174	0.973821	451.398	0.17871	0.243954	0.346377	0.743227
ENSMUSG00000026688	Mgst3	403.571	-0.0173494	0.131349	0.81187	0.953162	137.491	0.227833	0.315785	0.33538	0.731511	137.491	-0.209199	0.303388	0.304367	0.706688
ENSMUSG00000015843		3.96889	0.159176	0.469072	0.16084	0.505104
ENSMUSG00000026686	Lmx1a	30.025	1.2316	0.464987	0.00013992	0.00266505	6.96261	4.25698	1.40942	0.000123916	0.00351889	6.96261	4.47461	1.40918	6.37477e-05	0.00250109
ENSMUSG00000052534	Pbx1	348.523	0.220835	0.367366	0.0890115	0.358245	19.622	-0.0436003	0.387689	0.83017	0.959184	19.622	-0.549991	0.829791	0.0271179	0.212193
ENSMUSG00000103780	RP24-93F24.2	7.29976	0.315468	0.521545	0.0509409	0.254387	0.95144	-0.0150941	0.450089	0.822733		0.95144	-0.0493722	0.384551	0.254391
ENSMUSG00000102594	RP24-93F24.1	10.5699	0.43312	0.529653	0.0230548	0.149856	3.10022	0.0512714	0.442374	0.670076	0.909127	3.10022	-0.00382555	0.371267	0.960797	0.991019
ENSMUSG00000026683	Nuf2	1038.4	-0.305048	0.134182	0.00188331	0.0231002	332.606	0.157546	0.252972	0.458682	0.808622	332.606	0.164187	0.243688	0.400867	0.785116
ENSMUSG00000026678	Rgs5	4.95636	0.767217	0.884313	0.00585545	0.0558299	1.312	0.0615061	0.454674	0.524889		1.312	0.0679958	0.386186	0.274521
ENSMUSG00000070532		7.20753	-0.917256	0.865139	0.00368815	0.0390294
ENSMUSG00000026675	Hsd17b7	545.507	0.12848	0.118099	0.0889163	0.358005	108.276	0.0430663	0.314651	0.851851	0.963743	108.276	-0.12452	0.299695	0.518536	0.851419
ENSMUSG00000097503	3110045C21Rik	7.16741	0.101263	0.305253	0.316102	0.695923	10.4299	0.182789	0.414148	0.410138	0.785324	10.4299	0.107673	0.350308	0.51647	0.849924
ENSMUSG00000026674	Ddr2	490.805	1.30734	0.15381	1.72234e-18	4.10711e-16	130.54	2.54819	0.464163	2.79979e-09	2.92988e-07	130.54	1.84622	0.476014	6.72982e-06	0.000370871
ENSMUSG00000026670	Uap1	1426.56	0.0765359	0.104492	0.245298	0.624262	603.707	1.89022	0.335988	1.51942e-09	1.6929e-07	603.707	1.50652	0.340127	7.4687e-07	5.56103e-05
ENSMUSG00000104266		3.29065	0.0473508	0.319918	0.61002	0.885815
ENSMUSG00000026667	Uhmk1	2731.29	0.0203783	0.113253	0.76504	0.941884	242.212	0.595742	0.347781	0.0259929	0.195562	242.212	0.114947	0.267293	0.5545	0.869237
ENSMUSG00000073494		8.86608	-0.104981	0.281427	0.29208	0.672816
ENSMUSG00000096964	Gm6345	11.4549	-0.0283512	0.217779	0.736896	0.933359	2.16281	-0.0454501	0.448362	0.645428	0.900817	2.16281	0.0283495	0.374896	0.699922
ENSMUSG00000102752		10.9762	1.04018	0.892301	0.00243666	0.0281954
ENSMUSG00000038473	Nos1ap	7.88435	0.2781	0.488582	0.0653166	0.29723	1.39918	0.0991663	0.468747	0.171976		1.39918	-0.00273859	0.377448	0.987216
ENSMUSG00000102193		2.48927	0.00340432	0.321529	0.969582	0.992992
ENSMUSG00000038463	Olfml2b	8.90937	1.42101	0.817784	0.000567215	0.00864976	1.22614	-0.0327209	0.454243	0.609716		1.22614	-0.00666444	0.377966	0.880042
ENSMUSG00000026663	Atf6	1425.01	-0.0364581	0.0744418	0.453707	0.805977	171.067	-0.0319769	0.287883	0.88418	0.973376	171.067	0.0164748	0.265726	0.93302	0.984359
ENSMUSG00000096547		1.50512	-0.0417159	0.37061	0.636824
ENSMUSG00000053925	Gm9929	34.0466	-0.10409	0.212385	0.256761	0.636987	4.42934	0.198586	0.465819	0.275416	0.680679	4.42934	0.104207	0.374164	0.414797	0.793894
ENSMUSG00000026659	Dusp12	541.261	0.0701536	0.126405	0.342792	0.72051	317.15	0.334297	0.262461	0.126715	0.482188	317.15	0.533769	0.283598	0.0168419	0.157101
ENSMUSG00000096968	Gm26620	2.50281	0.0460307	0.329903	0.618761	0.889346	1.99483	0.12674	0.457299	0.368904	0.755237	1.99483	0.00625709	0.368085	0.94826
ENSMUSG00000089838	Gm2962	3.01368	-0.0501507	0.34264	0.588297	0.878818	7.69021	0.0286966	0.413018	0.869425	0.968631	7.69021	0.20732	0.423283	0.160443	0.537821
ENSMUSG00000026656	Fcgr2b	7.46356	0.0805822	0.29586	0.405838	0.771548	8.40284	-0.857726	0.937074	0.0233329	0.182774	8.40284	-0.438868	0.638218	0.0482522	0.292001
ENSMUSG00000104340	RP24-65D16.4	10.6961	0.225377	0.395722	0.0907666	0.361906	4.22753	-0.0288208	0.420461	0.860385	0.966122	4.22753	-0.11188	0.383124	0.349094	0.745205
ENSMUSG00000059498	Fcgr3	24.9575	-0.00507323	0.189839	0.949725	0.988877	121.321	4.87303	0.675555	1.57826e-14	4.82158e-12	121.321	4.11923	0.681642	4.90494e-11	1.17389e-08
ENSMUSG00000026649	1700009P17Rik	10.6156	0.00234634	0.221547	0.977721	0.99502	13.8617	0.0892935	0.400827	0.664508	0.906911	13.8617	0.292265	0.466762	0.119998	0.467083
ENSMUSG00000058076	Sdhc	2413.48	-0.0145728	0.115077	0.832014	0.959376	1302.35	0.0348469	0.193622	0.844502	0.961462	1302.35	0.10806	0.188699	0.511611	0.847442
ENSMUSG00000056569		4.47249	0.0021764	0.291038	0.980557	0.995899
ENSMUSG00000038370	Pcp4l1	7.91749	0.0712836	0.265358	0.444373	0.800129	26.1417	0.563181	0.628572	0.062673	0.333733	26.1417	-0.0616754	0.33973	0.700536	0.931953
ENSMUSG00000005677	Nr1i3	6.98108	-0.235118	0.434769	0.0882891	0.35637	0.705358	-0.0251672	0.451537	0.742108		0.705358	-0.0175011	0.378043	0.774178
ENSMUSG00000005674	Tomm40l	164.451	-0.398643	0.252597	0.00473671	0.0473924	83.5666	-0.331916	0.339716	0.177691	0.566227	83.5666	-0.150381	0.288496	0.444685	0.810755
ENSMUSG00000005681	Apoa2	5.63989	0.627164	0.759669	0.01075	0.0870704	222.383	-0.153522	0.273272	0.483291	0.823709	222.383	-0.259808	0.28035	0.203469	0.596765
ENSMUSG00000058715	Fcer1g	11.8647	0.128128	0.283311	0.216609	0.590012	6.98152	2.5624	1.54079	0.00384384	0.0526935	6.98152	0.22371	0.460629	0.0684874	0.353375
ENSMUSG00000013593	Ndufs2	5211.65	-0.0319963	0.122582	0.653174	0.903895	1581.7	0.0791812	0.219236	0.680255	0.912645	1581.7	0.265415	0.225139	0.147905	0.515226
ENSMUSG00000006403	Adamts4	77.3904	-0.116238	0.163948	0.178475	0.535326	13.3115	-2.11145	1.34917	0.00261145	0.0398026	13.3115	-0.355034	0.620436	0.0194071	0.172207
ENSMUSG00000052423	B4galt3	464.005	-0.281043	0.125724	0.00263061	0.0298993	214.036	0.0627653	0.346097	0.780103	0.943277	214.036	0.247035	0.367011	0.230314	0.63078
ENSMUSG00000062729	Ppox	600.205	-0.299833	0.162905	0.00499232	0.0495019	130.276	-0.208627	0.262664	0.331266	0.728494	130.276	0.134003	0.242792	0.479835	0.83215
ENSMUSG00000053483	Usp21	677.926	-0.112277	0.132695	0.154844	0.494781	741.054	0.11435	0.270379	0.59583	0.878795	741.054	-0.103579	0.255104	0.585074	0.885354
ENSMUSG00000062963	Ufc1	1396.29	-0.0941557	0.149388	0.247025	0.625742	863.994	0.0634911	0.234612	0.754155	0.936242	863.994	0.026662	0.2218	0.878051	0.973217
ENSMUSG00000103983	RP23-395H6.2	134.693	-0.0721528	0.1577	0.371264	0.742868	16.7794	0.0886638	0.3765	0.684715	0.913636	16.7794	0.0218411	0.327351	0.897385	0.977177
ENSMUSG00000013973	Dedd	131.275	-0.10518	0.154489	0.207462	0.578615	31.4722	0.0901519	0.300673	0.693411	0.916744	31.4722	0.0629295	0.276508	0.743262	0.941295
ENSMUSG00000013997	Nit1	625.197	-0.0380683	0.108704	0.568856	0.870754	153.189	-0.0530345	0.236773	0.794752	0.947066	153.189	0.161071	0.231835	0.401588	0.785174
ENSMUSG00000006412	Pfdn2	331.614	0.0407156	0.119127	0.563435	0.867204	272.174	0.183202	0.248694	0.382575	0.76727	272.174	-0.0624564	0.230374	0.731698	0.939592
ENSMUSG00000102929	RP23-191A19.1	21.9592	-0.104505	0.251838	0.278872	0.659325	3.53252	-0.204926	0.503582	0.124909	0.479023	3.53252	-0.0868759	0.382558	0.338377	0.736513
ENSMUSG00000045259	Klhdc9	23.2308	0.0590704	0.201291	0.486795	0.827434	1.16291	-0.0690335	0.45593	0.456797		1.16291	-0.00200094	0.374341	0.973033
ENSMUSG00000006411	Pvrl4	57.6474	0.0774442	0.189387	0.365192	0.738985	13.435	0.00593043	0.428239	0.972061	0.99239	13.435	-0.0508308	0.370015	0.618854	0.899112
ENSMUSG00000048865	Arhgap30	1106.71	-0.0132217	0.113763	0.846447	0.963806	10.3361	-0.00904548	0.419838	0.953235	0.989218	10.3361	-0.0174782	0.360084	0.87857	0.973217
ENSMUSG00000026641	Usf1	1861.53	0.0552592	0.101897	0.388767	0.75856	375.265	-0.0518644	0.291211	0.81501	0.953716	375.265	0.129121	0.277683	0.511931	0.847803
ENSMUSG00000103711	Tstd1	66.9771	0.0197334	0.157552	0.79787	0.949581	9.38077	1.10995	1.09838	0.0167632	0.148232	9.38077	0.38115	0.589347	0.0567827	0.319221
ENSMUSG00000038235	F11r	1448.92	0.270171	0.148062	0.00676163	0.0616197	1833.45	0.837181	0.24211	0.000116536	0.00333431	1833.45	0.525587	0.238357	0.00812463	0.0983468
ENSMUSG00000091993	B930036N10Rik	28.788	0.079582	0.203758	0.363224	0.737911	66.0855	0.00905124	0.425295	0.958341	0.990357	66.0855	0.0095404	0.362376	0.936851	0.985562
ENSMUSG00000060244	Alyref2	40.7095	0.229289	0.276635	0.056613	0.271919	3.97778	0.165124	0.444457	0.377392	0.763124	3.97778	-0.0683021	0.364215	0.59389	0.889089
ENSMUSG00000004709	Cd244	1.8442	0.125576	0.473923	0.193101		2.28012	0.0066257	0.444689	0.953242	0.989218	2.28012	-0.0807306	0.390861	0.151225
ENSMUSG00000059058	Tma7-ps	6.38394	-0.0736922	0.301257	0.443673	0.799722	6.03065	0.28265	0.509768	0.172563	0.558433	6.03065	0.238788	0.44748	0.128748	0.484373
ENSMUSG00000015314	Slamf6	17.7536	2.02561	0.510071	1.72204e-06	5.80128e-05	4.33641	-0.188003	0.496924	0.129943	0.487761	4.33641	-0.0474391	0.372684	0.603952	0.893547
ENSMUSG00000026556	Vangl2	799.335	-0.00472255	0.139884	0.949297	0.988809	71.3838	-0.493156	0.489037	0.0799243	0.378753	71.3838	-0.744942	0.624579	0.0178361	0.162926
ENSMUSG00000051251		4.70294	-0.00225138	0.279008	0.97978	0.99569
ENSMUSG00000003458	Ncstn	1287.71	0.00110555	0.102263	0.986235	0.996627	485.506	-0.0214473	0.2598	0.924693	0.981917	485.506	-0.0480797	0.244474	0.796473	0.954157
ENSMUSG00000026553	Copa	8118.36	-0.0622571	0.0829708	0.245468	0.624363	897.212	-0.0875166	0.315235	0.699044	0.918029	897.212	-0.0849283	0.289919	0.653372	0.9146
ENSMUSG00000102779		8.36196	-0.102808	0.298691	0.30769	0.689303
ENSMUSG00000103380		7.3004	-0.165697	0.391719	0.16414	0.511056
ENSMUSG00000003464	Pex19	1871.02	-0.00287631	0.0956554	0.962531	0.991434	550.748	0.149353	0.211448	0.426812	0.792339	550.748	0.0669723	0.200712	0.697228	0.931755
ENSMUSG00000089803	Gm10171	3.43225	-0.031209	0.321416	0.731323	0.93168	10.0128	0.287954	0.466385	0.214109	0.613068	10.0128	0.294784	0.455258	0.126337	0.478927
ENSMUSG00000026554	Dcaf8	3328.77	-0.0240774	0.0726375	0.616892	0.88897	297.713	0.0458961	0.265342	0.831733	0.959397	297.713	0.0119044	0.247573	0.950694	0.988325
ENSMUSG00000013698	Pea15a	161.083	0.286792	0.255952	0.0228078	0.148887	85.8676	0.491125	0.366288	0.0668868	0.345676	85.8676	0.0536246	0.275352	0.781704	0.951635
ENSMUSG00000007122	Casq1	7.00684	-0.0360632	0.256332	0.684477	0.916486	13.8339	-0.398944	0.542556	0.119235	0.469528	13.8339	-0.0817188	0.343935	0.612654	0.896891
ENSMUSG00000092085		1.60363	-0.0025662	0.344082	0.976685
ENSMUSG00000007107	Atp1a4	4.97071	0.115039	0.372517	0.278528	0.658947	1.2622	-0.0174278	0.450586	0.804057		1.2622	-0.0245057	0.379071	0.621672
ENSMUSG00000038034	Igsf8	609.025	0.142982	0.149591	0.098026	0.380269	42.4321	-0.42983	0.486257	0.109714	0.451267	42.4321	-0.272533	0.402239	0.172588	0.555071
ENSMUSG00000007097	Atp1a2	23.026	2.7492	0.48091	1.41535e-10	1.08941e-08	4.92938	0.0874318	0.438131	0.558385	0.861093	4.92938	0.0290343	0.365522	0.783975	0.951923
ENSMUSG00000038026		14.9241	0.627521	0.633179	0.00947922	0.0795868
ENSMUSG00000044708	Kcnj10	40.0082	0.353576	0.384701	0.0253725	0.159739	1.35702	0.12463	0.474149	0.185537		1.35702	-0.0232535	0.377351	0.796425
ENSMUSG00000050229	Pigm	2229.21	-0.134828	0.108617	0.0627828	0.289961	175.075	-0.17195	0.197436	0.332607	0.729241	175.075	-0.173943	0.19381	0.295863	0.69885
ENSMUSG00000102278	RP23-157J4.3	21.9767	0.70109	0.499303	0.00363162	0.0385057	0.767349	0.030439	0.453179	0.590064		0.767349	-0.0300697	0.381644	0.64791
ENSMUSG00000103357		2.43296	0.0126732	0.347874	0.885171	0.974067
ENSMUSG00000026548		10.3389	0.763785	0.686645	0.0055377	0.0534923
ENSMUSG00000037995	Igsf9	124.712	0.766326	0.239862	3.36229e-05	0.000808912	22.2529	-0.921877	0.693843	0.015617	0.141078	22.2529	-0.294641	0.426513	0.142061	0.507128
ENSMUSG00000026547	Tagln2	1538.22	0.0189172	0.103234	0.769282	0.942924	1590.22	-0.533085	0.281435	0.020717	0.170066	1590.22	-0.365042	0.268549	0.0773609	0.37763
ENSMUSG00000104351	RP24-144H23.5	8.97259	-0.00678346	0.280164	0.939205	0.986792	2.18868	-0.107491	0.467083	0.213152	0.612364	2.18868	-0.107013	0.40212	0.0208363
ENSMUSG00000026546	Cfap45	40.4061	0.216427	0.281405	0.068482	0.305687	26.5906	-0.392567	0.436058	0.136729	0.500441	26.5906	-0.495746	0.504903	0.0551947	0.314837
ENSMUSG00000085184	4933439K11Rik	10.4737	0.0603411	0.246955	0.503169	0.836265	9.02509	0.0259294	0.408398	0.88868	0.974094	9.02509	-0.0937718	0.36773	0.477731	0.831266
ENSMUSG00000049598		3.10919	0.0616867	0.350505	0.513286	0.841643
ENSMUSG00000053318		1.27359	0.0680984	0.422782	0.417878
ENSMUSG00000026544	Dusp23	11.6976	0.0463673	0.234818	0.596189	0.880935	6.37695	-0.127284	0.429765	0.486698	0.825443	6.37695	-0.165766	0.399562	0.240235	0.641
ENSMUSG00000005338	Cadm3	1.46817	0.0674888	0.381287	0.467315		2.33684	0.113675	0.468432	0.212211	0.611329	2.33684	-0.0297592	0.378381	0.489961
ENSMUSG00000037860	Aim2	96.2282	0.11611	0.169369	0.183562	0.542897	84.1371	-0.682824	0.451659	0.0246144	0.189367	84.1371	-1.13373	0.489634	0.0013621	0.027493
ENSMUSG00000026532	Spta1	10.8505	1.78516	0.906456	0.00018856	0.0034201	29.364	-0.698723	0.678516	0.0349152	0.234464	29.364	-0.635752	0.74058	0.0279021	0.215114
ENSMUSG00000028354	Fmn2	211.251	0.0506171	0.17583	0.532811	0.85246	35.9335	-0.99764	0.631713	0.00922187	0.0979411	35.9335	-1.44787	0.638554	0.00111812	0.0235918
ENSMUSG00000050069		4.1019	1.24292	1.25903	0.000473949	0.00745658
ENSMUSG00000026527		10.2098	0.247972	0.41948	0.076702	0.327705
ENSMUSG00000026526	Fh1	2659.12	-0.0354763	0.112878	0.603481	0.88349	998.428	-0.181547	0.232713	0.35947	0.748389	998.428	0.0811717	0.216687	0.64482	0.909776
ENSMUSG00000039783	Kmo	10.9417	0.0304399	0.230048	0.722864	0.929833	0.811351	0.031958	0.449595	0.723681		0.811351	-0.0527061	0.384495	0.372624
ENSMUSG00000026525	Opn3	7.152	0.0974521	0.308177	0.332423	0.711503	2.33472	-0.161225	0.480109	0.203985	0.60051	2.33472	-0.0592302	0.375091	0.535619
ENSMUSG00000078185	Chml	1226.53	-0.336643	0.135487	0.000817002	0.0117377	27.8674	-0.361778	0.414751	0.161882	0.541446	27.8674	-0.464608	0.477401	0.0620711	0.335313
ENSMUSG00000026523		25.5306	0.0149107	0.163091	0.847576	0.964201
ENSMUSG00000039748	Exo1	2538.28	-0.10301	0.122176	0.16823	0.517694	470.664	-0.00595351	0.271184	0.977123	0.993886	470.664	0.282726	0.289003	0.176261	0.56043
ENSMUSG00000094820		1.70272	0.0320217	0.363531	0.71517
ENSMUSG00000104158	RP24-531A1.1	1.88961	0.0183036	0.334078	0.837521		3.46618	0.224477	0.536082	0.021428	0.173226	3.46618	0.168227	0.43637	0.00557843	0.0766028
ENSMUSG00000055214		1.62897	0.0910501	0.422002	0.330475
ENSMUSG00000078184	B020018G12Rik	2.30533	-0.0570691	0.34636	0.542426	0.857802	4.50183	0.126946	0.445168	0.446985	0.803107	4.50183	0.304235	0.542753	0.0402664	0.264232
ENSMUSG00000103471		3.0405	0.0237653	0.312662	0.79257	0.947816
ENSMUSG00000057335	Cep170	1806.65	-0.0200375	0.0834142	0.714782	0.926455	134.628	0.0776852	0.313295	0.736807	0.930387	134.628	0.043534	0.284809	0.819589	0.960687
ENSMUSG00000103634		10.9538	-0.0218589	0.236077	0.799389	0.949618
ENSMUSG00000104154	RP23-440J24.4	14.4738	-0.0516419	0.226689	0.553271	0.862862	3.58883	-0.0340654	0.43204	0.805881	0.951068	3.58883	-0.0872377	0.380671	0.391387	0.777315
ENSMUSG00000103435		4.21876	-0.00579528	0.277725	0.947968	0.988288
ENSMUSG00000065573		2.09798	-0.0396653	0.35769	0.658264	0.905745
ENSMUSG00000084749		2.63998	0.178319	0.462695	0.142041	0.472819
ENSMUSG00000026504	Sdccag8	185.807	-0.218557	0.182451	0.032962	0.189687	27.2837	-0.0796918	0.356747	0.720781	0.925178	27.2837	0.299938	0.40004	0.160318	0.537592
ENSMUSG00000103367		2.22278	0.0848582	0.384843	0.38314	0.753364
ENSMUSG00000102475		2.24755	-0.0679456	0.38194	0.464477	0.812943
ENSMUSG00000087082	Gm15423	2.36765	-0.00636335	0.317185	0.94329	0.987461	0.732894	-0.0582437	0.459568	0.46085		0.732894	0.0170414	0.37769	0.769713
ENSMUSG00000103251	RP23-293I7.7	1.54616	-0.05717	0.382207	0.525263		1.5853	0.093926	0.460278	0.356767		1.5853	0.0588198	0.381863	0.390805
ENSMUSG00000019699	Akt3	581.189	0.18901	0.161184	0.0451459	0.235354	63.1552	-0.18286	0.386861	0.424813	0.792023	63.1552	-0.169058	0.353536	0.355405	0.749651
ENSMUSG00000104391	RP23-268A12.1	3.19412	0.20365	0.502152	0.10926	0.406289	5.3096	-0.158107	0.478468	0.191963	0.584656	5.3096	-0.11001	0.394166	0.199831	0.592731
ENSMUSG00000102133	RP23-268A12.2	3.837	0.0839259	0.345956	0.397273	0.764133	0.924655	-0.0227937	0.44751	0.802852		0.924655	-0.0324199	0.37765	0.644484
ENSMUSG00000102749	RP23-268A12.3	3.42338	-0.0486033	0.33812	0.599707	0.882278	1.1386	-0.031078	0.449553	0.713842		1.1386	-0.0432842	0.381089	0.44764
ENSMUSG00000103163	RP23-379C24.1	4.57855	0.132332	0.374535	0.231011	0.607688	3.60073	-0.125653	0.478044	0.0729836	0.361481	3.60073	-0.100902	0.400283	0.00919588	0.105955
ENSMUSG00000103646	RP23-379C24.2	7.71436	-0.0226202	0.25699	0.797062	0.949376	4.44007	-0.0935333	0.447164	0.475591	0.818273	4.44007	-0.125186	0.400159	0.156428	0.531271
ENSMUSG00000102427		3.56591	0.061843	0.34055	0.514247	0.8424
ENSMUSG00000063659	Zbtb18	475.162	-0.0664244	0.100673	0.297072	0.677768	14.4337	-0.139904	0.418009	0.488431	0.826364	14.4337	-0.210275	0.414894	0.191614	0.582327
ENSMUSG00000015962	1700016C15Rik	4.22579	0.379205	0.682754	0.029378	0.176697	1.03725	0.0739638	0.459266	0.408584		1.03725	0.0480023	0.382027	0.427014
ENSMUSG00000015961	Adss	4906.41	0.035838	0.110278	0.594792	0.880799	1240.13	-0.476441	0.30965	0.0497769	0.292077	1240.13	-0.125197	0.254356	0.500878	0.841476
ENSMUSG00000089657	Gm16585	8.94197	0.0176088	0.233805	0.837041	0.960815	8.80577	-0.0425931	0.439041	0.730575	0.928402	8.80577	0.0190001	0.36885	0.84149	0.966006
ENSMUSG00000102483		2.522	0.0927805	0.393284	0.347528	0.724391
ENSMUSG00000091476	Gm16432	6.05125	-0.013051	0.248845	0.880624	0.972883	1.60458	0.00131064	0.436897	0.992497		1.60458	-0.0387341	0.372605	0.668544
ENSMUSG00000104097		4.4118	-0.0836326	0.335704	0.398608	0.764972
ENSMUSG00000026502	Desi2	1662.54	-0.198806	0.12363	0.0195804	0.134459	187.648	-0.242912	0.320021	0.304069	0.705977	187.648	-0.308711	0.33063	0.154578	0.527531
ENSMUSG00000104126	RP24-252K15.3	2.18381	0.0330121	0.346316	0.713189	0.926082	4.01424	0.180196	0.456246	0.333558	0.729804	4.01424	0.128353	0.383932	0.329401	0.730147
ENSMUSG00000086350	B230369F24Rik	23.6986	-0.0378427	0.181822	0.639826	0.899081	8.62497	-0.0169928	0.408551	0.924165	0.981917	8.62497	0.110659	0.369769	0.430002	0.804178
ENSMUSG00000026500	Cox20	9.27016	-0.28222	0.458181	0.0609538	0.284495	1.30213	0.042614	0.441506	0.722702		1.30213	0.00549534	0.370764	0.948646
ENSMUSG00000039630	Hnrnpu	24699.8	-0.0755502	0.0991934	0.232006	0.608616	2042.25	-0.47193	0.215869	0.0133648	0.126571	2042.25	-0.464655	0.217967	0.0118325	0.124438
ENSMUSG00000104279	RP24-252K15.4	3.31494	0.156306	0.431169	0.178261	0.535122	1.91821	0.328107	0.6428	0.00639545	0.0764749	1.91821	0.142306	0.414594	0.0978577
ENSMUSG00000026495	Efcab2	49.9036	0.305864	0.341215	0.0325971	0.188429	42.194	-0.0847772	0.362064	0.704609	0.92029	42.194	-0.0330229	0.317525	0.850377	0.967707
ENSMUSG00000026494	Kif26b	18.2364	0.544639	0.499382	0.00980373	0.0814956	0.868291	0.0792171	0.458902	0.416644		0.868291	0.0563569	0.382518	0.439373
ENSMUSG00000055067	Smyd3	1292.02	-0.0864307	0.106864	0.200043	0.567747	296.836	0.0297303	0.255929	0.887168	0.974094	296.836	0.362764	0.283666	0.089692	0.406094
ENSMUSG00000096474	Gm5561	1.16967	-0.03537	0.379054	0.679811		9.31728	-0.0291804	0.401806	0.874622	0.970431	9.31728	-0.0408455	0.349512	0.771094	0.9492
ENSMUSG00000026492	Tfb2m	274.344	-0.0161423	0.0989116	0.796716	0.949376	147.192	-0.0755073	0.349095	0.737075	0.930516	147.192	0.102741	0.318441	0.583376	0.884382
ENSMUSG00000082395	Gm15480	9.9586	0.143193	0.344606	0.200125	0.567747	1.35039	0.137483	0.483691	0.0878855		1.35039	0.0783344	0.390171	0.219003
ENSMUSG00000038949	Cnst	691.014	-0.0192299	0.0784278	0.711248	0.925373	61.906	0.612245	0.341155	0.0210568	0.171616	61.906	0.658277	0.355656	0.0111669	0.119922
ENSMUSG00000038936	Sccpdh	1826.87	-0.117182	0.141552	0.151919	0.489451	359.801	-0.415477	0.284656	0.0702493	0.354316	359.801	-0.145729	0.245683	0.442269	0.810472
ENSMUSG00000087236	Gm1305	10.5229	0.704827	0.653339	0.00675253	0.0616061	1.25044	0.140299	0.474063	0.243192		1.25044	0.103073	0.393686	0.216978
ENSMUSG00000026491	Ahctf1	11834.9	-0.0252962	0.0637357	0.546807	0.860404	3007.65	0.142513	0.423292	0.479125	0.821072	3007.65	0.0169906	0.34707	0.928627	0.983143
ENSMUSG00000073486		6.63904	-0.0505964	0.26839	0.578375	0.874948
ENSMUSG00000104418	RP23-204N23.1	1.29592	0.135413	0.510478	0.128088		1.23423	-0.0231963	0.447422	0.786536		1.23423	-0.0660723	0.386164	0.271027
ENSMUSG00000026490	Cdc42bpa	1922.25	-0.106218	0.109506	0.129178	0.446722	89.8685	-0.282456	0.348749	0.247106	0.649602	89.8685	-0.636163	0.453455	0.022339	0.188063
ENSMUSG00000102194		8.21771	-0.211296	0.426868	0.108546	0.404623
ENSMUSG00000103636	RP23-226J18.3	18.3642	-0.125892	0.264923	0.214117	0.587343	0.726718	0.0153443	0.451081	0.755807		0.726718	0.00373689	0.377682	0.847327
ENSMUSG00000026489	Adck3	123.589	-0.00929557	0.121007	0.894885	0.976779	44.9272	0.0286721	0.315875	0.901738	0.976657	44.9272	0.0277446	0.288208	0.884462	0.973606
ENSMUSG00000104520		3.88457	-0.0499945	0.305036	0.590862	0.879507
ENSMUSG00000010609	Psen2	296.913	-0.513669	0.205584	0.000264325	0.00455969	57.9325	-0.178747	0.342461	0.447191	0.803226	57.9325	-0.2646	0.353506	0.208847	0.603357
ENSMUSG00000102923		1.41607	0.07171	0.388944	0.440407
ENSMUSG00000055676	Gm5069	2.75191	0.049288	0.331532	0.59591	0.880888	2.29597	0.118153	0.463188	0.304196	0.706187	2.29597	0.114856	0.398034	0.156562
ENSMUSG00000038855	Itpkb	115.334	-0.110277	0.190639	0.219333	0.592965	5.01277	0.182426	0.43759	0.374044	0.759923	5.01277	-0.0298799	0.351376	0.826739	0.963555
ENSMUSG00000104388	RP24-74O18.2	4.27956	0.0215115	0.343288	0.808638	0.952186	1.31286	0.137799	0.477074	0.187887		1.31286	0.01228	0.374484	0.884203
ENSMUSG00000103772		1.54178	0.129174	0.487413	0.170086
ENSMUSG00000053963	6330403A02Rik	1.39992	0.0774517	0.422267	0.378829		1.131	0.0416704	0.453821	0.718066		1.131	0.051961	0.383821	0.318979
ENSMUSG00000026496	Parp1	18429.8	0.168517	0.1295	0.0440672	0.23119	2696.83	0.0854017	0.279341	0.703099	0.919712	2696.83	0.18319	0.275237	0.355954	0.749651
ENSMUSG00000098926		7.14147	-0.0499736	0.254224	0.577696	0.87449
ENSMUSG00000058729	Lin9	1013.65	-0.0196397	0.102994	0.76039	0.940741	153.54	0.197801	0.228189	0.318962	0.717598	153.54	0.220848	0.224739	0.2313	0.632219
ENSMUSG00000026497	Mixl1	10.4363	0.124076	0.297636	0.234637	0.611839	7.26736	0.126318	0.439561	0.468458	0.814807	7.26736	0.13454	0.389226	0.300123	0.703377
ENSMUSG00000026499	Acbd3	1149.24	-0.117966	0.13633	0.142716	0.473766	102.139	-0.389206	0.334628	0.118593	0.468464	102.139	-0.345207	0.328875	0.11816	0.464425
ENSMUSG00000103649	RP23-201I6.5	23.4068	0.0966392	0.214989	0.288681	0.669487	3.38696	0.285743	0.571367	0.0509193	0.295757	3.38696	-0.0281165	0.372347	0.722601	0.937389
ENSMUSG00000103156	RP23-201I6.6	7.15271	-0.0150253	0.236924	0.86105	0.967699	0.771122	0.0108244	0.447562	0.903811		0.771122	-0.0328637	0.378913	0.643627
ENSMUSG00000060743	H3f3a	4903.88	0.0158999	0.120434	0.821007	0.955981	4639.56	0.31992	0.245013	0.120591	0.47173	4639.56	0.358659	0.248617	0.0682801	0.352728
ENSMUSG00000073485	H3f3aos	68.0478	-0.287178	0.255575	0.0226133	0.148214	2.24531	0.182975	0.487521	0.16791	0.550722	2.24531	0.123121	0.39753	0.188375
ENSMUSG00000038806	Sde2	2246.69	-0.0392841	0.0864274	0.483367	0.825569	569.073	-0.162016	0.23831	0.424862	0.792023	569.073	0.0837578	0.222627	0.638432	0.90796
ENSMUSG00000103979		68.9362	0.0708844	0.179061	0.395971	0.762826
ENSMUSG00000066652	Lefty2	3118.27	-0.894136	0.172641	2.07402e-08	1.10871e-06	78.3776	-0.994225	1.09619	0.0143468	0.132882	78.3776	-0.226988	0.42503	0.164942	0.543378
ENSMUSG00000026520	Pycr2	1882.42	-0.136791	0.151736	0.112689	0.413958	603.94	-0.450104	0.356831	0.0807976	0.381548	603.94	-0.0788715	0.273945	0.679453	0.924944
ENSMUSG00000038793	Lefty1	185.926	-1.28277	0.191255	1.86208e-12	1.85621e-10	53.0679	-0.599138	1.51707	0.00178382	0.0303298	53.0679	-0.189333	0.437338	0.0709095	0.360709
ENSMUSG00000026519	Tmem63a	83.2285	-0.318737	0.238871	0.0122271	0.0949549	23.9472	-0.0813762	0.371896	0.708056	0.921738	23.9472	0.229646	0.38245	0.234785	0.636429
ENSMUSG00000085563		1.46432	-0.0407473	0.371307	0.643574
ENSMUSG00000038776	Ephx1	722.31	-0.564656	0.166175	1.09659e-05	0.000301384	112.404	0.285688	0.363608	0.253358	0.658278	112.404	0.873892	0.495466	0.00767485	0.0949607
ENSMUSG00000102219		1.80134	0.0727065	0.403638	0.422615
ENSMUSG00000026516	Nvl	4048.59	-0.205491	0.0969023	0.00675855	0.0616148	548.218	-0.150889	0.190542	0.382413	0.767217	548.218	-0.141275	0.185513	0.382601	0.770482
ENSMUSG00000062169	Cnih4	1045.61	-0.133727	0.116121	0.0758071	0.325636	1066.51	-0.0681057	0.245259	0.738802	0.93142	1066.51	-0.044198	0.230969	0.80821	0.956751
ENSMUSG00000038733	Wdr26	3492.93	-0.000626973	0.124506	0.992974	0.997856	223.541	-0.0546168	0.223832	0.777917	0.942769	223.541	-0.315199	0.238814	0.100462	0.431882
ENSMUSG00000054135		9.88156	-0.101035	0.306975	0.317583	0.696408
ENSMUSG00000081214	Rpl35a-ps2	35.7647	0.0679665	0.197454	0.426272	0.787781	54.6109	0.171176	0.401968	0.443911	0.801735	54.6109	0.103937	0.343874	0.540889	0.862528
ENSMUSG00000103260	RP23-292F19.4	50.2157	-0.0442951	0.167937	0.578319	0.874948	1.35445	-0.0441345	0.452348	0.610426		1.35445	0.0153354	0.376038	0.806495
ENSMUSG00000047369	Dnah14	35.7097	0.295884	0.323477	0.0329274	0.189561	4.59724	0.244766	0.506119	0.163927	0.544534	4.59724	0.00758347	0.362857	0.943733	0.986912
ENSMUSG00000004880	Lbr	6882.58	0.0240872	0.101056	0.704862	0.923089	1280.73	0.218695	0.15866	0.14334	0.511976	1280.73	0.254045	0.158275	0.0764675	0.375411
ENSMUSG00000089429		1.15457	0.171003	0.540902	0.0924973
ENSMUSG00000022995	Enah	6499.33	-0.391643	0.108099	1.08016e-05	0.000298215	949.905	-0.0633615	0.201495	0.724133	0.926494	949.905	-0.179139	0.200661	0.293184	0.696401
ENSMUSG00000103722	RP23-73N8.4	65.6368	-0.135975	0.276203	0.192233	0.556166	18.4237	-0.0833005	0.39627	0.682422	0.912965	18.4237	0.029611	0.340034	0.848807	0.967268
ENSMUSG00000103317	RP23-73N8.3	19.5356	-0.0184916	0.214401	0.82487	0.957046	49.162	-0.305583	0.370744	0.220142	0.618952	49.162	-0.102017	0.300127	0.591533	0.887743
ENSMUSG00000102950	RP23-73N8.2	40.8828	0.0075361	0.209318	0.927406	0.984234	29.876	0.0670881	0.400294	0.737438	0.930568	29.876	-0.085823	0.356455	0.556065	0.870224
ENSMUSG00000102760	RP23-73N8.1	40.2654	-0.0252616	0.226919	0.766906	0.942379	26.4436	-0.118844	0.38713	0.580152	0.873968	26.4436	-0.0599806	0.333013	0.715478	0.93649
ENSMUSG00000026511	Srp9	2213.46	-0.00267002	0.121919	0.969813	0.992992	975.951	0.351784	0.316856	0.143481	0.512026	975.951	0.468274	0.342721	0.0494118	0.295958
ENSMUSG00000038633	Degs1	3386.91	0.0671107	0.0961175	0.274032	0.655581	1496.74	0.242279	0.284899	0.286683	0.690842	1496.74	0.119175	0.257444	0.537375	0.860988
ENSMUSG00000047539	Fbxo28	2036.15	0.0151698	0.0815702	0.778334	0.944598	206.593	0.21536	0.236713	0.290735	0.694285	206.593	0.152465	0.224923	0.406322	0.789048
ENSMUSG00000073482	Gm10517	4.95304	-0.0418151	0.28317	0.646468	0.901867	0.891934	0.00146255	0.448677	0.984158		0.891934	-0.000982985	0.376571	0.997064
ENSMUSG00000026510	Trp53bp2	757.841	0.102988	0.118359	0.160342	0.504462	72.4705	0.10056	0.272249	0.6482	0.901966	72.4705	-0.234973	0.282013	0.24606	0.648152
ENSMUSG00000026509	Capn2	408.24	0.0256765	0.0940412	0.670537	0.911446	33.3125	0.0482639	0.379192	0.823455	0.956933	33.3125	0.0308658	0.332685	0.852275	0.968011
ENSMUSG00000102234		2.2044	-0.0479821	0.402255	0.564081	0.867539
ENSMUSG00000104415	RP23-67I3.5	5.72851	0.120366	0.371782	0.262862	0.642408	2.3534	0.0210214	0.445882	0.827542	0.958214	2.3534	-0.00274388	0.374961	0.964075
ENSMUSG00000038599		4.29368	0.135254	0.385786	0.224166	0.599494
ENSMUSG00000104376		2.73886	0.501574	0.863778	0.00812214	0.0709347
ENSMUSG00000043429		1.33929	0.076119	0.421059	0.385956
ENSMUSG00000038576	Susd4	222.969	0.876481	0.237336	8.29058e-06	0.000236959	20.437	0.430998	0.562475	0.103666	0.4379	20.437	0.630884	0.837243	0.0284126	0.21735
ENSMUSG00000079164	Tlr5	3.42685	0.373308	0.703801	0.0265159	0.164623	0.965992	0.0198214	0.450808	0.785408		0.965992	-0.0160325	0.378423	0.796905
ENSMUSG00000030768	Disp1	238.103	-0.141867	0.152354	0.102706	0.390818	42.027	0.167153	0.338378	0.478921	0.821001	42.027	0.0668932	0.297296	0.724287	0.937651
ENSMUSG00000102478	RP24-268A16.1	8.66221	-0.244434	0.440804	0.0819417	0.341688	7.27059	0.140992	0.451575	0.381955	0.766724	7.27059	0.0122801	0.36267	0.911767	0.980853
ENSMUSG00000046836	Brox	1723.24	-0.0818273	0.11402	0.244372	0.623365	261.969	0.027965	0.228136	0.889342	0.974258	261.969	0.0993604	0.219801	0.582634	0.883822
ENSMUSG00000042901	Aida	817.915	-0.0377641	0.0903624	0.517094	0.843354	74.0316	-0.540989	0.439782	0.0573726	0.316912	74.0316	-0.536675	0.462413	0.0409719	0.266047
ENSMUSG00000056050	Mia3	2142.83	0.0992266	0.102336	0.133653	0.455492	138.693	-0.388226	0.285046	0.0895511	0.4044	138.693	-0.512449	0.305614	0.0243677	0.197806
ENSMUSG00000072258	Taf1a	425.725	-0.0136669	0.0890224	0.813586	0.953358	147.689	0.225025	0.284875	0.322917	0.720167	147.689	0.146715	0.262867	0.454847	0.817503
ENSMUSG00000104212	CAAA01187608.3	2.66568	0.0749987	0.367594	0.435692	0.79483	1.00801	-5.9655e-05	0.448396	0.991756		1.00801	-0.0497087	0.383571	0.357076
ENSMUSG00000053461	Hhipl2	5.62235	0.121744	0.345824	0.256458	0.636987	0.750957	0.0324275	0.448737	0.768007		0.750957	0.0389749	0.378579	0.589096
ENSMUSG00000104022	CAAA01187608.2	1.33289	0.156524	0.545874	0.0756077		1.5573	-0.0339086	0.452857	0.532134		1.5573	-0.0220013	0.378697	0.549948
ENSMUSG00000103451	RP24-411K2.1	2.03491	0.194781	0.522882	0.105399	0.397336	2.95497	0.133566	0.477364	0.160678	0.539899	2.95497	0.0826668	0.389055	0.232027	0.633061
ENSMUSG00000039384	Dusp10	195.336	0.732773	0.225007	2.5927e-05	0.000646792	21.0912	-0.0328652	0.368124	0.878098	0.971763	21.0912	-0.122412	0.344217	0.48328	0.833727
ENSMUSG00000044854		9.86519	-0.0286397	0.252605	0.744622	0.936522
ENSMUSG00000039377		6.20059	0.0838543	0.307311	0.392975	0.760785
ENSMUSG00000026621	Marc1	3.07963	0.124604	0.423921	0.239758	0.617693	3.48158	0.0989099	0.44929	0.46345	0.811659	3.48158	0.0665926	0.376259	0.490385	0.836346
ENSMUSG00000073481	Marc2	2725.61	-0.210457	0.168171	0.0325327	0.188269	1046.25	0.200335	0.29771	0.38614	0.768892	1046.25	0.641083	0.372111	0.0153631	0.148802
ENSMUSG00000039349	C130074G19Rik	688.444	0.0351245	0.118596	0.616585	0.888828	50.0035	2.05411	0.484263	1.32586e-06	6.95656e-05	50.0035	1.9336	0.490014	4.12346e-06	0.000242021
ENSMUSG00000026620	Mark1	280.746	-0.164403	0.142123	0.0584903	0.27778	14.4186	-0.456826	0.602365	0.0815245	0.383546	14.4186	-0.95661	1.20922	0.0103217	0.114517
ENSMUSG00000102784		6.76071	-0.0247313	0.268021	0.780886	0.945804
ENSMUSG00000039318	Rab3gap2	1432	-0.242876	0.133433	0.00885435	0.07554	97.673	-0.0461525	0.294083	0.834135	0.959794	97.673	-0.128294	0.282261	0.507983	0.844698
ENSMUSG00000103613		4.33867	0.0449171	0.299224	0.626183	0.892625
ENSMUSG00000026618	Iars2	5288.48	0.0143862	0.096095	0.814757	0.953811	291.778	-0.115345	0.285618	0.602848	0.883173	291.778	0.0336176	0.260186	0.857708	0.969646
ENSMUSG00000104368		2.42285	-0.0331725	0.32937	0.715044	0.926635
ENSMUSG00000065581		2.48787	0.0520281	0.354954	0.572362	0.872335
ENSMUSG00000102526	RP24-150H14.3	37.1774	-0.14617	0.228361	0.143982	0.475762	1.59588	0.0784717	0.45282	0.460795		1.59588	0.0261588	0.37419	0.734324
ENSMUSG00000026617	Bpnt1	1806.54	-0.028526	0.106207	0.664324	0.908539	361.751	0.00957267	0.288624	0.970326	0.991946	361.751	0.0264332	0.266706	0.891389	0.974757
ENSMUSG00000097261	4930532G15Rik	10.8443	0.0544028	0.229391	0.534878	0.853551	2.87051	0.150829	0.461496	0.331577	0.728657	2.87051	-0.0769444	0.378663	0.438917
ENSMUSG00000026615	Eprs	16295.9	-0.0427032	0.0841075	0.433969	0.793622	1920.34	-0.253545	0.159205	0.0982714	0.425565	1920.34	-0.0456972	0.152108	0.741211	0.940618
ENSMUSG00000051295	9630028B13Rik	3.79049	-0.0165311	0.294702	0.853905	0.965808	3.4463	-0.171779	0.484633	0.170336	0.555212	3.4463	-0.177472	0.437053	0.0330518	0.236178
ENSMUSG00000097615		13.0203	0.110655	0.261654	0.261419	0.640848
ENSMUSG00000026614	Slc30a10	99.2163	0.32774	0.233152	0.00998476	0.0826052	5.88904	-0.0916007	0.431779	0.572061	0.869641	5.88904	-0.091165	0.37419	0.444659	0.810755
ENSMUSG00000102185	RP24-170O7.1	9.80148	-0.343459	0.471669	0.0382377	0.209429	19.0224	-0.363525	0.564357	0.10883	0.449293	19.0224	0.155538	0.379569	0.328074	0.728963
ENSMUSG00000039246	Lyplal1	461.777	-0.0146676	0.101043	0.817555	0.954898	139.923	0.111053	0.310187	0.632609	0.894853	139.923	-0.0453176	0.280792	0.810776	0.957259
ENSMUSG00000103056		7.55113	-0.506292	0.666431	0.0182472	0.127648
ENSMUSG00000039239	Tgfb2	25.0931	-0.110768	0.234162	0.24562	0.624363	5.89786	0.0559391	0.415268	0.755161	0.936466	5.89786	-0.0220711	0.35593	0.860626	0.970363
ENSMUSG00000102619	RP24-276N20.3	8.62333	-0.0729916	0.264611	0.434288	0.793836	0.579011	-0.0436082	0.454707	0.588217		0.579011	-0.0299511	0.379885	0.605986
ENSMUSG00000001305	Rrp15	1957.79	-0.0409165	0.13379	0.581454	0.875981	682.703	-0.0931962	0.27947	0.670862	0.909268	682.703	0.0804606	0.259726	0.675332	0.923503
ENSMUSG00000097784	A430105J06Rik	17.712	-0.13748	0.256506	0.178775	0.535846	2.89099	0.333238	0.622235	0.0290712	0.209916	2.89099	0.124346	0.398852	0.160758
ENSMUSG00000104312	RP23-429I18.2	13.6902	-0.00132075	0.203119	0.987143	0.996732	3.00768	0.0473911	0.438644	0.716233	0.924315	3.00768	-0.0607255	0.37749	0.479285	0.832069
ENSMUSG00000039224	D1Pas1	199.922	-0.0274021	0.168002	0.727497	0.930158	170.023	0.170243	0.34679	0.472502	0.816575	170.023	0.380381	0.409382	0.104031	0.438004
ENSMUSG00000026611	Spata17	4.48095	-0.0553076	0.303062	0.554712	0.863504	7.28094	0.555803	0.835883	0.0444059	0.271233	7.28094	0.404094	0.669607	0.0365586	0.249174
ENSMUSG00000039210	Gpatch2	1202.34	-0.0140266	0.0717832	0.7702	0.942937	144.947	0.626469	0.282767	0.00832223	0.0916994	144.947	0.367581	0.266682	0.0758602	0.374671
ENSMUSG00000104394	RP23-306B14.3	252.651	0.119028	0.126837	0.125584	0.440011	102.118	0.0943155	0.346903	0.683971	0.913491	102.118	-0.173031	0.339234	0.363657	0.75439
ENSMUSG00000104245	RP23-349L18.2	91.3107	-0.119486	0.185629	0.185601	0.545675	1.69521	0.12101	0.468191	0.177016	0.565121	1.69521	0.0496643	0.379197	0.379321
ENSMUSG00000103923		1.30873	0.108814	0.457994	0.238536
ENSMUSG00000026610		3.1595	0.594322	0.903049	0.00701806	0.0635282
ENSMUSG00000026609	Ush2a	17.1379	1.2918	0.577055	0.000306664	0.00519067	3.13442	0.146379	0.457469	0.342463	0.737341	3.13442	0.0213907	0.365875	0.832929	0.965108
ENSMUSG00000026608	Kctd3	1514.85	0.00224166	0.0700722	0.962109	0.991434	171.665	-0.635567	0.207927	0.000722252	0.0147416	171.665	-0.388926	0.201362	0.02437	0.197806
ENSMUSG00000037624	Kcnk2	4.62513	0.125755	0.3624	0.247325	0.62607	2.8951	-0.103767	0.43956	0.522772	0.844668	2.8951	0.184684	0.416781	0.170773
ENSMUSG00000102824	RP23-411B11.2	142.512	0.0332161	0.14079	0.658679	0.905911	41.3414	0.0962245	0.360628	0.675256	0.911451	41.3414	0.0120633	0.315646	0.947534	0.987493
ENSMUSG00000103087		3.14839	0.162488	0.443736	0.166269	0.514722
ENSMUSG00000026605	Cenpf	6301.1	-0.00712102	0.112753	0.916489	0.981324	827.775	-0.517146	0.335578	0.0426828	0.26446	827.775	-0.444744	0.333634	0.0538135	0.310838
ENSMUSG00000103374		9.83475	-0.0433433	0.243787	0.622976	0.890962
ENSMUSG00000026604	Ptpn14	821.216	0.343612	0.275368	0.0129053	0.0991772	252	-0.0228891	0.373251	0.911586	0.978968	252	-0.0639992	0.333904	0.701295	0.932513
ENSMUSG00000102248		1.24251	0.0783223	0.438201	0.347623
ENSMUSG00000097925	Gm26574	13.6261	0.0115269	0.200471	0.887914	0.974934	1.57652	0.129514	0.478476	0.130213		1.57652	0.0383694	0.379573	0.691394
ENSMUSG00000104435	RP24-288J3.2	46.6087	-0.119645	0.191885	0.189523	0.55154	5.20149	0.0817263	0.429799	0.616561	0.889028	5.20149	0.0208266	0.360938	0.858461	0.969842
ENSMUSG00000026603	Smyd2	364.857	-0.338738	0.150023	0.00139953	0.0181842	178.685	-0.230816	0.208868	0.212833	0.61191	178.685	-0.0278769	0.19347	0.866296	0.971642
ENSMUSG00000103467		12.8985	-0.0834085	0.297491	0.392261	0.760572
ENSMUSG00000010175		10.7681	-0.0110257	0.218773	0.895363	0.976895
ENSMUSG00000093064		2.68184	-0.00586521	0.356161	0.945921	0.988046
ENSMUSG00000089872	Rps6kc1	1015.51	-0.00138508	0.0844534	0.980138	0.995712	56.9296	-0.228427	0.359068	0.340795	0.735444	56.9296	-0.0509209	0.298529	0.781792	0.951635
ENSMUSG00000026634	Angel2	1290.92	0.0455569	0.0804153	0.382704	0.753212	260.024	-0.0183464	0.242801	0.926848	0.982404	260.024	-0.0688275	0.231191	0.704994	0.933879
ENSMUSG00000037568	Vash2	57.963	1.0648	0.359219	7.38708e-05	0.00155564	5.16	-0.455065	0.742259	0.0356762	0.236854	5.16	-0.159817	0.400329	0.233296	0.634321
ENSMUSG00000103723		1.29061	0.135345	0.48575	0.168766
ENSMUSG00000103964		3.94976	-0.0112686	0.279927	0.899282	0.977922
ENSMUSG00000066595	Mfsd7b	556.595	-0.0679446	0.107562	0.310426	0.691232	72.2218	-0.0905821	0.307313	0.68773	0.914611	72.2218	-0.421944	0.382639	0.0753934	0.373467
ENSMUSG00000097845	A230020J21Rik	3.34146	-0.000859076	0.309422	0.992342	0.997798	1.47033	-0.00260155	0.441621	0.980349		1.47033	-0.01039	0.372555	0.895562
ENSMUSG00000057072	Spata45	4.76693	0.271698	0.543546	0.0669317	0.301534	3.51945	-0.0151318	0.414414	0.929049	0.982896	3.51945	-0.0299381	0.356593	0.816694	0.960214
ENSMUSG00000026632	Tatdn3	188.182	-0.0642895	0.124781	0.379464	0.750124	46.2786	0.312196	0.402087	0.223049	0.621913	46.2786	0.426508	0.459096	0.0819919	0.388043
ENSMUSG00000062510	Nsl1	1158.76	-0.216208	0.153765	0.0238647	0.153156	159.028	0.215505	0.317739	0.363437	0.751675	159.028	0.17984	0.29612	0.371586	0.761676
ENSMUSG00000103576	RP23-399N18.7	23.7364	0.0557866	0.233105	0.527078	0.849351	4.42281	-0.0391317	0.430402	0.784956	0.943948	4.42281	-0.167401	0.423441	0.0765028	0.375411
ENSMUSG00000026630	Batf3	4.1593	0.0892972	0.324665	0.371451	0.742932	0.955872	0.070146	0.462587	0.26536		0.955872	0.0410025	0.38282	0.508673
ENSMUSG00000026628	Atf3	271.138	0.318568	0.208516	0.00818917	0.0713414	31.4208	0.895285	0.702998	0.0207229	0.170066	31.4208	0.728775	0.742797	0.0252129	0.202586
ENSMUSG00000073478	D730003I15Rik	34.9482	-0.135695	0.211906	0.158517	0.501611	10.8209	-0.159214	0.394407	0.474684	0.817586	10.8209	0.168152	0.355605	0.364781	0.756094
ENSMUSG00000103685		1.65535	0.0320964	0.385843	0.701209
ENSMUSG00000037499	Nenf	182.228	0.00549745	0.114631	0.936034	0.986104	24.9159	0.0269242	0.330338	0.907937	0.978313	24.9159	-0.0983497	0.308193	0.603776	0.893547
ENSMUSG00000026627	Tmem206	132.684	0.0279678	0.111836	0.68002	0.914659	31.9253	-0.139471	0.362174	0.543879	0.853733	31.9253	-0.0699732	0.315211	0.700048	0.931885
ENSMUSG00000026626	Ppp2r5a	2152.96	-0.0530692	0.103437	0.412846	0.77764	149.142	-0.437953	0.38769	0.0986528	0.426377	149.142	-0.45634	0.406345	0.0629114	0.337914
ENSMUSG00000102246	RP24-566B6.4	15.8271	-0.0348347	0.248902	0.692195	0.91889	8.202	0.203112	0.471441	0.272156	0.676731	8.202	0.0396138	0.36047	0.750232	0.943307
ENSMUSG00000037474	Dtl	2420.69	-0.143816	0.130309	0.0767901	0.327908	627.223	-0.165379	0.187856	0.331188	0.728491	627.223	-0.0488793	0.179119	0.754244	0.94472
ENSMUSG00000037461	Ints7	2048.15	-0.194108	0.112548	0.0163074	0.118491	565.489	0.115758	0.174751	0.473672	0.816958	565.489	0.0530736	0.168918	0.727283	0.938182
ENSMUSG00000102970	RP24-566B6.2	15.2127	-0.0432765	0.206248	0.606792	0.885045	2.33199	0.0532218	0.447202	0.613198	0.888093	2.33199	0.0133199	0.37375	0.849823
ENSMUSG00000026623	Lpgat1	1579.1	0.0150077	0.084261	0.786486	0.946887	151.993	0.404238	0.337427	0.109266	0.45021	151.993	0.236923	0.299398	0.251693	0.65477
ENSMUSG00000064845		1.71361	-0.123135	0.471958	0.198413
ENSMUSG00000102840	RP23-355E19.1	15.1178	-0.0372814	0.204632	0.655085	0.904876	10.0613	0.189493	0.436878	0.359957	0.748761	10.0613	0.173721	0.38884	0.280305	0.685642
ENSMUSG00000026622	Nek2	2117.37	-0.0211082	0.0770709	0.679318	0.914258	387.015	-0.261462	0.231324	0.185947	0.576908	387.015	0.0168478	0.209596	0.924981	0.983143
ENSMUSG00000055833	1700034H15Rik	12.4711	-0.0423811	0.234901	0.626869	0.89312	3.94349	0.0494745	0.414941	0.779561	0.943071	3.94349	-0.00145559	0.355199	0.989596	0.997634
ENSMUSG00000037434	Slc30a1	540.742	-0.156743	0.126372	0.0541575	0.265258	78.7676	-0.997894	0.482214	0.00396622	0.0536601	78.7676	-1.32795	0.490442	0.000393351	0.0106631
ENSMUSG00000049353		6.25539	0.141452	0.401066	0.209716	0.581685
ENSMUSG00000097416	Gm26670	12.7756	-0.0903424	0.262983	0.344628	0.722254	1.67353	0.0784766	0.446369	0.525865	0.845517	1.67353	0.0647317	0.377126	0.47045
ENSMUSG00000026637	Traf5	17.3131	-0.0806202	0.236628	0.378076	0.748838	5.42496	0.127742	0.424044	0.508325	0.837088	5.42496	-0.492938	0.951513	0.0152936	0.148444
ENSMUSG00000103653	WI1-1003N17.1	7.21622	0.502431	0.679695	0.0185736	0.129237	113.263	0.148065	0.377248	0.517447	0.84237	113.263	0.103053	0.331408	0.566079	0.87501
ENSMUSG00000037395	Rcor3	205.655	-0.0401017	0.119768	0.570287	0.871404	55.652	-0.491915	0.39713	0.069692	0.352815	55.652	-0.505807	0.418928	0.0449405	0.28198
ENSMUSG00000058248	Kcnh1	9.35849	0.0698975	0.257246	0.448693	0.802506	3.138	-0.0234829	0.436133	0.85017	0.962699	3.138	-0.140728	0.412807	0.0739002	0.368596
ENSMUSG00000037375	Hhat	77.1493	0.0415276	0.150839	0.5908	0.879507	73.5301	-0.111499	0.355924	0.622724	0.890944	73.5301	-0.285966	0.396728	0.169135	0.549746
ENSMUSG00000094131		1.26186	-0.13203	0.488007	0.167606
ENSMUSG00000047384		1.71124	0.00801522	0.357191	0.926086
ENSMUSG00000016262	Sertad4	15.5493	0.0211083	0.197279	0.79618	0.949284	2.64022	-0.103999	0.458852	0.359476	0.748389	2.64022	0.00598242	0.369978	0.950269
ENSMUSG00000102162		5.637	0.0937229	0.313169	0.349552	0.725749
ENSMUSG00000016200	Syt14	1263.75	-0.0311299	0.0904876	0.594475	0.880656	63.9894	-0.814676	0.529449	0.0157503	0.141836	63.9894	-1.02909	0.569876	0.00427036	0.0638762
ENSMUSG00000089158		3.83564	-0.27151	0.563773	0.0641858	0.294253
ENSMUSG00000016181	Diexf	431.173	-0.0138793	0.124277	0.845532	0.963593	102.385	0.0892658	0.306071	0.697859	0.91771	102.385	-0.0505804	0.279986	0.789009	0.95308
ENSMUSG00000026638	Irf6	378.643	0.151175	0.135835	0.0709169	0.312481	29.7475	0.585854	0.501782	0.0574508	0.316912	29.7475	0.574994	0.537864	0.0401675	0.263891
ENSMUSG00000079144	A130010J15Rik	282.49	-0.0266911	0.123402	0.708055	0.924028	69.1435	-0.0446949	0.292943	0.840754	0.960118	69.1435	0.0106458	0.26895	0.959256	0.990747
ENSMUSG00000037318	Traf3ip3	6.30993	0.262764	0.510262	0.0732415	0.318572	1.23	0.0789407	0.464789	0.187082		1.23	0.0437826	0.383138	0.497688
ENSMUSG00000026639	Lamb3	18.5254	1.13311	0.633492	0.000880207	0.0124943	5.23369	0.0867948	0.437783	0.563852	0.864981	5.23369	0.0413028	0.367081	0.694792	0.930925
ENSMUSG00000009633	G0s2	49.1581	0.151126	0.242296	0.141017	0.471292	8.91223	-0.164336	0.458723	0.326031	0.723957	8.91223	-0.222048	0.457013	0.0723777	0.364346
ENSMUSG00000104348		1.9899	0.0301329	0.339032	0.737802	0.933737
ENSMUSG00000097850	4631405K08Rik	2.09968	-0.0571586	0.36291	0.536527	0.854457	26.7717	-1.07543	1.2026	0.012787	0.122739	26.7717	-0.157421	0.384222	0.301778	0.704527
ENSMUSG00000026640	Plxna2	166.376	0.224998	0.268891	0.0574267	0.274688	31.0584	-0.142097	0.408743	0.496706	0.83033	31.0584	-0.294883	0.472535	0.105666	0.440192
ENSMUSG00000102523	RP23-288J11.1	2.32198	-0.0219009	0.35555	0.802517	0.950411	1.38915	-0.0213099	0.450342	0.753173		1.38915	-0.056134	0.386049	0.162714
ENSMUSG00000102621		1.41878	0.0726107	0.426961	0.390789
ENSMUSG00000102841		1.41245	0.013113	0.364294	0.878235
ENSMUSG00000016494	Cd34	86.5523	1.42745	0.232531	6.42066e-11	5.17118e-09	4.75223	-0.244394	0.513894	0.144875	0.513732	4.75223	-0.041741	0.363538	0.711978	0.935244
ENSMUSG00000097325		2.65692	0.0065822	0.322988	0.941229	0.987239
ENSMUSG00000096929	A330023F24Rik	26.9382	0.0801379	0.211508	0.365283	0.738985	3.73498	0.019258	0.428833	0.898	0.975288	3.73498	-0.0386402	0.367617	0.713162	0.935684
ENSMUSG00000104525	RP23-445K23.3	10.5523	0.389126	0.538023	0.0314754	0.184749	2.1387	0.0802748	0.44654	0.534558	0.848953	2.1387	-0.0953076	0.390896	0.248404
ENSMUSG00000103867	RP23-445K23.5	6.29267	-0.00371651	0.272762	0.966506	0.992773	8.27617	-0.127888	0.439378	0.452173	0.805626	8.27617	-0.162071	0.406668	0.184578	0.571683
ENSMUSG00000016493	Cd46	19.0685	0.0645704	0.205663	0.452891	0.805676	2.36399	0.0853751	0.439027	0.566661	0.86651	2.36399	-0.106657	0.389589	0.279053
ENSMUSG00000104010		2.20078	0.392483	0.763037	0.0162651	0.118306
ENSMUSG00000103443		2.90915	0.0188886	0.319722	0.833622	0.959766
ENSMUSG00000016481	Cr1l	776.334	0.0246471	0.106667	0.708329	0.924236	446.684	0.0134201	0.276177	0.953763	0.989225	446.684	0.0396729	0.257253	0.837108	0.965336
ENSMUSG00000026616	Cr2	15.0502	1.46676	0.616923	0.000187236	0.00340625	3.1202	-0.0300438	0.439688	0.800922	0.949476	3.1202	-0.047391	0.37595	0.543473	0.864205
ENSMUSG00000050530	Fam171a1	206.065	0.195068	0.223713	0.0676529	0.303043	19.621	0.260933	0.461673	0.251097	0.654921	19.621	0.0784685	0.349747	0.614268	0.897356
ENSMUSG00000026643	Nmt2	5588.31	0.0234712	0.0870977	0.679433	0.914258	804.182	-0.456304	0.417651	0.0914098	0.409216	804.182	-0.325663	0.378388	0.136053	0.496916
ENSMUSG00000075837		5.92018	-0.0244757	0.256021	0.78086	0.945804
ENSMUSG00000049950	Rpp38	323.384	-0.185645	0.156804	0.0458023	0.237335	181.063	-0.092366	0.287648	0.678744	0.912645	181.063	-0.0341802	0.263456	0.856407	0.969128
ENSMUSG00000026644	Acbd7	44.4202	0.113214	0.202893	0.217615	0.591204	15.2534	1.13587	0.747167	0.00978771	0.101806	15.2534	0.856229	0.818817	0.0169215	0.157405
ENSMUSG00000026650		1.52335	0.314268	0.696473	0.0244639
ENSMUSG00000026648	Dclre1c	489.775	-0.0657749	0.118771	0.356263	0.731997	160.198	0.645375	0.346744	0.0167903	0.148379	160.198	0.924773	0.365751	0.00122727	0.0253208
ENSMUSG00000026646	Suv39h2	978.013	-0.0750797	0.114632	0.284848	0.665357	122.759	0.104295	0.293547	0.645942	0.900991	122.759	-0.170791	0.287911	0.389311	0.775797
ENSMUSG00000085043	Gm13184	15.1065	-0.0819702	0.228212	0.366075	0.738985	1.29403	-0.0697396	0.455285	0.424361		1.29403	-0.0890718	0.394547	0.0749578
ENSMUSG00000109865		3668.1	0.0134887	0.11336	0.843097	0.96344	1293.75	-0.133483	0.253694	0.527327	0.845786	1293.75	0.08065	0.23659	0.678008	0.924695
ENSMUSG00000051396	Hspa14	294.621	0.0416652	0.107688	0.53078	0.851932	46.6224	-0.218783	0.331087	0.353703	0.745583	46.6224	-0.0891143	0.28682	0.64016	0.907986
ENSMUSG00000039496	Cdnf	11.1682	-0.0906116	0.275468	0.349428	0.725746	0.763506	0.0866864	0.463111	0.312194		0.763506	-0.00263729	0.377283	0.986972
ENSMUSG00000026655	Fam107b	966.659	0.306547	0.177925	0.00599559	0.0566993	245.98	-1.09733	0.256878	2.42432e-06	0.000116842	245.98	-0.215769	0.22084	0.232775	0.63395
ENSMUSG00000085205		2.0495	0.0484336	0.348664	0.598503	0.881887
ENSMUSG00000026657	Frmd4a	759.638	-0.245924	0.223078	0.0309757	0.18262	77.2602	-1.37992	0.487002	0.000327929	0.0078495	77.2602	-1.78624	0.485413	1.20682e-05	0.000606703
ENSMUSG00000086018	Gm13179	2.59358	0.0701902	0.347282	0.465779	0.813711	0.916104	0.0270703	0.450315	0.799795		0.916104	0.0399672	0.380006	0.521083
ENSMUSG00000039449	Prpf18	1986.26	-0.00953918	0.0966694	0.877088	0.9724	462.431	0.111048	0.220185	0.566557	0.866465	462.431	0.109448	0.211618	0.537771	0.861027
ENSMUSG00000083378		1.96525	0.117017	0.427241	0.25488	0.634995
ENSMUSG00000048186	Bend7	81.2506	-0.0111331	0.129666	0.877844	0.9724	1.65237	0.0752579	0.451952	0.470832		1.65237	0.0626875	0.380593	0.403557
ENSMUSG00000026662	Sephs1	1903.45	-0.0357235	0.0909378	0.54238	0.857802	406.208	-0.179822	0.208941	0.331494	0.728657	406.208	-0.105538	0.199063	0.533591	0.859376
ENSMUSG00000026664	Phyh	1190.53	0.0692426	0.105768	0.295704	0.676749	642.804	0.816457	0.315861	0.00191751	0.0318617	642.804	1.14962	0.321754	3.40319e-05	0.00142178
ENSMUSG00000086670	Gm13194	4.49627	0.154975	0.401202	0.18337	0.542677	1.73088	-0.00216098	0.450013	0.954745	0.989435	1.73088	-0.0464026	0.384377	0.189784
ENSMUSG00000082795		7.39878	0.0343407	0.262666	0.700058	0.92103
ENSMUSG00000069188	Gm13192	5.8148	-0.020704	0.267628	0.815382	0.953977	17.4798	0.112435	0.373103	0.614682	0.888404	17.4798	0.0869088	0.330878	0.616712	0.898085
ENSMUSG00000026668	Ucma	10.3284	0.077982	0.278855	0.413121	0.777736	0.983194	-0.0251143	0.450505	0.803505		0.983194	0.0293046	0.378014	0.624975
ENSMUSG00000026669	Mcm10	3501.63	-0.166348	0.0990439	0.0214179	0.142686	704.441	-0.108173	0.219787	0.571049	0.869403	704.441	0.212404	0.219229	0.241257	0.642369
ENSMUSG00000026672	Optn	375.812	-0.383361	0.183103	0.00146809	0.0188534	39.913	-0.1176	0.329528	0.6132	0.888093	39.913	0.211162	0.326465	0.299834	0.703051
ENSMUSG00000086430		5.40006	-0.0630368	0.29884	0.504783	0.836939
ENSMUSG00000026676	Ccdc3	58.3943	2.50325	0.352781	3.39596e-14	4.39362e-12	6.92255	-0.15557	0.425972	0.439608	0.800021	6.92255	-0.086925	0.35653	0.556435	0.870316
ENSMUSG00000039145	Camk1d	907.43	0.35994	0.1908	0.00282714	0.0317472	151.59	-0.470437	0.379754	0.0768406	0.370907	151.59	-0.777313	0.442667	0.00842643	0.101123
ENSMUSG00000082013		1.477	0.0296715	0.356118	0.737098
ENSMUSG00000039128	Cdc123	1767.74	-0.0936634	0.130915	0.222949	0.597337	773.056	-0.0161759	0.202788	0.92464	0.981917	773.056	-0.0279669	0.194847	0.852951	0.968157
ENSMUSG00000025817	Nudt5	2062.01	-0.0598013	0.118999	0.400434	0.766247	1061.87	-0.0465808	0.243167	0.818663	0.954613	1061.87	0.10229	0.232784	0.582054	0.883525
ENSMUSG00000056718	Gm13199	49.7278	-0.0690211	0.163753	0.395848	0.762723	6.21957	-0.292317	0.50524	0.175217	0.562229	6.21957	-0.146387	0.382114	0.315336	0.718221
ENSMUSG00000025816	Sec61a2	817.602	-0.0314452	0.0999321	0.618256	0.889334	347.179	-0.204768	0.262738	0.341071	0.73579	347.179	-0.0666335	0.238549	0.71899	0.936808
ENSMUSG00000085818	Gm13267	8.54858	0.0498039	0.248039	0.576423	0.873977	22.8982	2.80284	0.716742	6.53716e-06	0.000279504	22.8982	1.0798	0.900625	0.0106228	0.116468
ENSMUSG00000025815	Dhtkd1	1724.23	0.0318843	0.101798	0.617957	0.889334	428.727	3.1759	0.51026	3.21741e-11	5.49018e-09	428.727	2.8718	0.51317	1.33316e-09	2.10702e-07
ENSMUSG00000043241	Upf2	1578.92	0.0785197	0.14085	0.315209	0.695088	172.714	-0.362911	0.258918	0.091658	0.409843	172.714	-0.173319	0.234151	0.353055	0.748038
ENSMUSG00000045319	Proser2	204.267	0.399872	0.183712	0.00106824	0.0146052	12.3233	-0.0468191	0.391761	0.815661	0.953716	12.3233	0.00183177	0.339474	0.99383	0.998777
ENSMUSG00000102887		2.01838	0.00515832	0.355247	0.952488	0.989824
ENSMUSG00000039063	Echdc3	46.4592	0.341141	0.306652	0.0175524	0.12436	103.701	3.59882	0.485365	1.50596e-14	4.67613e-12	103.701	4.11982	0.482487	2.04856e-18	2.28797e-15
ENSMUSG00000087125		1.96528	0.0518182	0.356737	0.573107	0.872581
ENSMUSG00000118578		2.82443	-0.121682	0.428083	0.243859	0.623044
ENSMUSG00000039046	Usp6nl	1345.33	0.0132813	0.0839673	0.810098	0.952759	85.6961	-0.155182	0.337204	0.504045	0.834249	85.6961	-0.14655	0.312371	0.448153	0.812838
ENSMUSG00000085716	Gm13388	7.06823	-0.0408212	0.282843	0.653914	0.904267	0.952177	-0.0315292	0.447228	0.770733		0.952177	0.0211266	0.374585	0.771098
ENSMUSG00000002107	Celf2	441.596	0.0537539	0.157145	0.496297	0.832501	44.9307	-0.284945	0.348649	0.245315	0.648229	44.9307	-0.443554	0.401717	0.0692851	0.355835
ENSMUSG00000065824		23.3978	-0.041612	0.21247	0.623084	0.890962
ENSMUSG00000082953	Gm13217	9.5043	-0.475178	0.599051	0.0203315	0.137711	1.67582	0.0160157	0.442478	0.880625	0.972497	1.67582	0.0480729	0.376642	0.537821
ENSMUSG00000015619	Gata3	14.9118	0.225538	0.352777	0.0812081	0.339736	9.89364	-0.0952598	0.426871	0.581786	0.874364	9.89364	-0.131434	0.38736	0.301929	0.70471
ENSMUSG00000025783		1.65302	0.0560009	0.3727	0.538755
ENSMUSG00000075534	Gm13262	4.67928	-0.00773332	0.278557	0.930664	0.985329	0.780831	0.00981104	0.449289	0.902263		0.780831	-0.033922	0.380276	0.598535
ENSMUSG00000025782	Taf3	394.111	-0.0148998	0.141746	0.841934	0.962911	112.475	0.226315	0.23499	0.26396	0.668888	112.475	-0.0341955	0.216769	0.845941	0.966715
ENSMUSG00000103570		8.33572	-0.0414903	0.259889	0.642892	0.900688
ENSMUSG00000025781	Atp5c1	9215.04	-0.0141245	0.123409	0.842375	0.963176	7084.71	0.140979	0.28371	0.532017	0.847727	7084.71	0.0840669	0.261161	0.664442	0.919232
ENSMUSG00000077733		12.7839	0.0356351	0.246174	0.684821	0.916652
ENSMUSG00000037262	Kin	490.566	-0.142114	0.167199	0.114422	0.416504	126.277	0.716983	0.299265	0.00430831	0.0567086	126.277	0.520958	0.295468	0.0222718	0.187866
ENSMUSG00000037254		1.364	-0.0024085	0.376259	0.976818
ENSMUSG00000025780	Itih5	117.21	1.54303	0.248031	3.47789e-11	2.97862e-09	1.97468	0.286457	0.575646	0.0400793	0.25347	1.97468	0.222301	0.471919	0.0217308
ENSMUSG00000086748	Gm13261	126.54	-0.539907	0.234281	0.00045194	0.00718928	58.4134	0.0948635	0.352294	0.679923	0.912645	58.4134	-0.187137	0.349474	0.330121	0.730451
ENSMUSG00000061186	Sfmbt2	2285.26	0.241291	0.161905	0.0163605	0.118686	176.229	-0.4601	0.420828	0.0910787	0.408409	176.229	-0.859014	0.521167	0.00787076	0.096388
ENSMUSG00000080500	Gm22072	7.40586	0.115263	0.315994	0.269127	0.649403	2.09926	-0.163223	0.490435	0.0516982	0.298087	2.09926	-0.0592742	0.378958	0.444863
ENSMUSG00000080627	Gm22677	6.63833	0.0703079	0.303719	0.463056	0.811975	4.03934	-0.138856	0.473768	0.179089	0.569244	4.03934	-0.0126555	0.370023	0.879114	0.973217
ENSMUSG00000092793	Mir466m	6.04937	-0.0162527	0.246302	0.851427	0.965422	7.97351	-0.243544	0.510574	0.142016	0.509499	7.97351	-0.166795	0.412436	0.161507	0.539027
ENSMUSG00000077972	Mir466f-1	3.53875	0.0734323	0.320257	0.448657	0.802506	8.98546	-0.20228	0.483658	0.210976	0.609514	8.98546	-0.126832	0.390641	0.273114	0.679867
ENSMUSG00000077038	Mir669f	3.77075	0.0142275	0.285215	0.873508	0.971477	1.30032	-0.0169027	0.442415	0.87198		1.30032	-0.0868129	0.390818	0.178504
ENSMUSG00000080653	Mir669e	7.00129	-0.0783268	0.294086	0.416868	0.780612	1.30313	-0.0354257	0.448394	0.717839		1.30313	0.0134642	0.374737	0.845453
ENSMUSG00000076126	Mir669b	4.64204	0.0648132	0.314966	0.496752	0.832643	3.29264	-0.00145333	0.437264	0.987323	0.997045	3.29264	-0.0452966	0.375056	0.573193	0.878081
ENSMUSG00000077131	Gm23578	9.12938	-0.116103	0.29991	0.26054	0.640056	5.76387	-0.10121	0.438433	0.517056	0.842296	5.76387	-0.0891625	0.376826	0.415327	0.794381
ENSMUSG00000077834	Mir669d	6.31433	0.117725	0.327773	0.264671	0.645115	8.41958	-0.120604	0.433021	0.489033	0.826854	8.41958	-0.231117	0.45707	0.0788748	0.381253
ENSMUSG00000077998	Mir466f-2	3.81105	-0.016872	0.296801	0.851033	0.965314	2.8492	-0.206912	0.517323	0.053494	0.304547	2.8492	-0.114954	0.399066	0.144456
ENSMUSG00000076959		2.4921	0.075734	0.356097	0.435328	0.794634
ENSMUSG00000080504	Mir669d-2	4.95646	0.0355314	0.300556	0.69705	0.920132	1.49868	-0.00703509	0.448675	0.911165		1.49868	-0.0584597	0.386489	0.159786
ENSMUSG00000077981	Mir466f-3	6.96164	-0.0439507	0.263581	0.625336	0.89198	1.0036	0.00544304	0.447019	0.952704		1.0036	-0.0273256	0.377665	0.687941
ENSMUSG00000076983	Mir297a-2	6.86387	0.0568304	0.2596	0.532097	0.852302	1.93125	-0.0162945	0.439779	0.887125	0.974094	1.93125	-0.0338378	0.373959	0.666715
ENSMUSG00000078026	Mir466o	13.4174	0.117149	0.286464	0.251415	0.631275	1.36228	0.0190471	0.444347	0.858426		1.36228	-0.0714263	0.386921	0.278912
ENSMUSG00000094165		20.4577	-0.00412196	0.191023	0.959207	0.991155
ENSMUSG00000077049		7.91772	0.0616346	0.286811	0.510423	0.840328
ENSMUSG00000106608		2.06299	0.0178312	0.340261	0.840827	0.962068
ENSMUSG00000076028		6.65044	0.1219	0.349035	0.256552	0.636987
ENSMUSG00000094297		13.9968	0.126705	0.306847	0.230608	0.607241
ENSMUSG00000095843		15.9409	-0.00651828	0.202603	0.936595	0.98631
ENSMUSG00000096624		6.30196	0.0348707	0.292879	0.701489	0.92158
ENSMUSG00000095269		2.35129	0.0670824	0.376123	0.472598	0.818468
ENSMUSG00000096583		7.28996	0.131214	0.339898	0.228593	0.605109
ENSMUSG00000080459		12.7165	0.0964125	0.256141	0.314085	0.693982
ENSMUSG00000095938		9.46985	0.0515631	0.239352	0.559919	0.865929
ENSMUSG00000095340		13.117	0.139541	0.290479	0.189816	0.551996
ENSMUSG00000096027		6.26479	0.0620816	0.287742	0.507891	0.839062
ENSMUSG00000104933		8.81644	0.0135338	0.257972	0.877334	0.9724
ENSMUSG00000105546		6.38765	0.0300366	0.287675	0.739597	0.934571
ENSMUSG00000095336		4.71248	0.082633	0.331145	0.40305	0.768772
ENSMUSG00000094190		10.5423	0.0402518	0.236106	0.644125	0.901098
ENSMUSG00000095509		7.63346	0.065582	0.282153	0.484643	0.826473
ENSMUSG00000104561		10.8949	0.0581469	0.254207	0.521002	0.845386	1.34719	-0.0292462	0.446687	0.752699		1.34719	-0.0552641	0.381796	0.403468
ENSMUSG00000104734		6.94719	-0.0396095	0.271213	0.660576	0.906827	1.49298	-0.027653	0.447083	0.758146		1.49298	-0.0270295	0.376656	0.60666
ENSMUSG00000094927		3.9602	-0.0957063	0.360077	0.346185	0.72339
ENSMUSG00000080405		8.80603	-0.0357234	0.233495	0.679737	0.9145
ENSMUSG00000095786		10.2024	-0.0852273	0.257377	0.366101	0.738985
ENSMUSG00000096880		7.05129	0.110719	0.327772	0.287833	0.668796
ENSMUSG00000096360		1.60893	0.0153123	0.339924	0.862859
ENSMUSG00000095222		1.78323	0.0816116	0.396541	0.389504
ENSMUSG00000076966		2.43868	0.0540361	0.336285	0.563598	0.867291
ENSMUSG00000105365		1.15649	0.0567928	0.419183	0.482424
ENSMUSG00000080649		14.8591	-0.0510515	0.224962	0.556708	0.864729
ENSMUSG00000096889		23.6475	0.274989	0.346572	0.0465701	0.239832
ENSMUSG00000080476		14.2154	0.0780158	0.231487	0.388958	0.758732
ENSMUSG00000093907		2.95881	0.43435	0.796183	0.0133178	0.101577
ENSMUSG00000096053		3.31967	-0.0384806	0.306111	0.674674	0.912115
ENSMUSG00000106488		6.58572	0.0388348	0.267676	0.665685	0.90907
ENSMUSG00000080684		15.7299	0.113107	0.247748	0.245308	0.624262
ENSMUSG00000095051		10.4292	-0.0731708	0.244254	0.423121	0.785435
ENSMUSG00000094943		14.0196	0.115919	0.25691	0.240851	0.618823
ENSMUSG00000076994		9.19752	0.0867709	0.274802	0.367091	0.7395
ENSMUSG00000105783		5.54163	-0.123885	0.355822	0.251811	0.631682
ENSMUSG00000094327	Gm26398	17.7919	0.0848665	0.235699	0.355852	0.731771	1.55522	-0.0508924	0.452823	0.529806		1.55522	-0.054878	0.383707	0.302448
ENSMUSG00000076948	Mir467e	6.18702	-0.0914322	0.302242	0.356302	0.732016	4.82713	-0.212698	0.481509	0.224199	0.62318	4.82713	-0.333578	0.598467	0.0161618	0.153317
ENSMUSG00000077113	Mir466p	8.53142	0.128847	0.317727	0.228488	0.604997	4.21175	-0.18137	0.454522	0.32078	0.718695	4.21175	-0.372377	0.644576	0.0209396	0.180688
ENSMUSG00000094330		15.1211	0.0212929	0.214912	0.79926	0.949618
ENSMUSG00000080624		9.0915	0.0273359	0.241793	0.752946	0.938208
ENSMUSG00000077021		2.26997	-0.0390805	0.331708	0.66926	0.911038
ENSMUSG00000070099		4.72797	0.0411811	0.284687	0.651548	0.903245
ENSMUSG00000080558		14.609	0.0311389	0.214549	0.71147	0.925488
ENSMUSG00000076976		3.89977	0.0381772	0.292054	0.675654	0.912567
ENSMUSG00000076118	Mir669c	3.27372	0.041759	0.32467	0.650039	0.902546	0.602996	-0.0479868	0.455456	0.544275		0.602996	-0.0355755	0.380974	0.488568
ENSMUSG00000077095		8.42607	0.113869	0.314025	0.273121	0.654367
ENSMUSG00000077104		7.42825	-0.0422478	0.256794	0.63608	0.897694
ENSMUSG00000076014	Mir669a-2	7.78567	0.049615	0.25152	0.579214	0.874948	1.56254	0.00668023	0.450294	0.945419		1.56254	-0.0431541	0.383771	0.240967
ENSMUSG00000092961	Gm22239	6.3146	-0.0485279	0.27245	0.594399	0.880656	1.07302	-0.024148	0.450407	0.708284		1.07302	0.00270061	0.376209	0.965119
ENSMUSG00000092697	Gm22925	9.09566	0.487649	0.591288	0.0186921	0.129739	1.36383	-0.0922492	0.468484	0.111202		1.36383	-0.0424615	0.381351	0.398441
ENSMUSG00000088833		7.89345	0.0389245	0.255657	0.66153	0.907028
ENSMUSG00000076222		7.01347	0.00346884	0.243063	0.967904	0.992961
ENSMUSG00000078031		2.75196	0.0506676	0.340309	0.585272	0.878034
ENSMUSG00000095699	Gm26092	7.08071	-0.0267986	0.260484	0.761956	0.941206	1.20678	-0.0615097	0.460593	0.252543		1.20678	-0.0463026	0.384434	0.166685
ENSMUSG00000089570		8.03836	0.0226983	0.236573	0.792065	0.947594
ENSMUSG00000088980		7.43506	0.259234	0.458342	0.0737815	0.319949
ENSMUSG00000077991		5.97426	0.386723	0.607424	0.0334006	0.191469
ENSMUSG00000077086		3.78648	-0.0262801	0.323603	0.771199	0.943179
ENSMUSG00000078025		4.3497	0.112983	0.351156	0.284395	0.665088
ENSMUSG00000077941		3.07738	-0.00571513	0.299958	0.949103	0.988694
ENSMUSG00000076956		5.26826	-0.00742559	0.283271	0.933576	0.985923
ENSMUSG00000078060	Mir466l	10.2245	0.141281	0.319687	0.197077	0.563346	1.22163	0.0145074	0.447635	0.878747		1.22163	0.0429392	0.379106	0.507088
ENSMUSG00000077954		7.2904	0.0268931	0.253177	0.759563	0.940378
ENSMUSG00000080686		21.2781	0.121073	0.24077	0.215512	0.589001
ENSMUSG00000080657		24.6249	0.103929	0.230453	0.268687	0.648922
ENSMUSG00000080594	Mir669h	10.3556	-0.0164933	0.230966	0.846651	0.963807	0.889229	-0.0600212	0.453552	0.400914		0.889229	-0.000573873	0.374055	0.990784
ENSMUSG00000103237		1.78864	0.241534	0.623451	0.0419183
ENSMUSG00000026778	Prkcq	12.8524	0.289269	0.438118	0.0551644	0.267735	0.711687	0.0204374	0.449476	0.811741		0.711687	-0.0308479	0.379864	0.645284
ENSMUSG00000082424	Gm13292	2.96697	-0.269732	0.592828	0.0578945	0.275998	5.78436	-0.0431281	0.42939	0.768341	0.939821	5.78436	-0.00904506	0.363011	0.930496	0.983479
ENSMUSG00000026773	Pfkfb3	455.437	0.0589295	0.154678	0.456104	0.806706	17.6714	0.164823	0.425785	0.427446	0.792818	17.6714	0.229775	0.423982	0.174382	0.557707
ENSMUSG00000102329		2.29438	0.0275056	0.324928	0.761025	0.940961
ENSMUSG00000102376		3.76563	-0.0742295	0.32488	0.444864	0.800441
ENSMUSG00000037197	Rbm17	2723.16	-0.0843978	0.149453	0.294035	0.675064	829.373	0.0674916	0.277932	0.764308	0.938643	829.373	0.317404	0.303679	0.139916	0.503981
ENSMUSG00000023206		2.17137	0.0433902	0.339162	0.63628	0.897694
ENSMUSG00000058594	Fbxo18	2815.76	-0.0746793	0.106526	0.263236	0.642977	209.469	-0.22025	0.246062	0.285338	0.689977	209.469	0.0285563	0.222902	0.876618	0.973217
ENSMUSG00000047909	Ankrd16	664.003	-0.239256	0.139969	0.0112617	0.08957	91.314	0.0101185	0.231583	0.961739	0.99098	91.314	-0.0177736	0.219908	0.919764	0.981908
ENSMUSG00000026768	Itga8	34.4457	0.667603	0.453011	0.00328751	0.0357932	2.86312	-0.11858	0.461104	0.332226	0.729084	2.86312	0.0482295	0.372053	0.620421
ENSMUSG00000026767	Fam188a	1341.15	0.0247623	0.091583	0.675419	0.912567	305.359	-0.118263	0.27308	0.586771	0.875701	305.359	-0.0488448	0.251398	0.794831	0.954157
ENSMUSG00000102630	RP23-232K16.3	5.30017	0.0218163	0.260652	0.804673	0.951058	1.3094	0.0689336	0.449201	0.533681		1.3094	-0.0083489	0.373276	0.924814
ENSMUSG00000104449	RP23-232K16.2	19.7976	0.0198727	0.208269	0.810608	0.952892	7.77484	0.0076768	0.423288	0.965088	0.991255	7.77484	-0.168294	0.418555	0.127468	0.48118
ENSMUSG00000104406	RP23-232K16.4	11.1809	-0.00872603	0.228839	0.918105	0.981973	5.71	-0.109476	0.426713	0.541739	0.852886	5.71	0.00420356	0.352632	0.97677	0.995135
ENSMUSG00000026730	Pter	355.094	-0.290749	0.176969	0.00800313	0.0701225	44.019	-0.512629	0.450443	0.0705518	0.355027	44.019	-0.233803	0.346082	0.254168	0.658228
ENSMUSG00000049630	C1ql3	6.37753	-0.0915649	0.326873	0.361852	0.736883	0.571317	-0.00262706	0.450734	0.963779		0.571317	-0.0367628	0.382504	0.451609
ENSMUSG00000104459		6.98858	-0.133232	0.3634	0.227783	0.604209
ENSMUSG00000102900		1.57034	0.172885	0.509528	0.123733
ENSMUSG00000103599		2.16542	-0.0672421	0.382702	0.467692	0.81476
ENSMUSG00000026727	Rsu1	573.545	-0.240463	0.138251	0.0105361	0.0858233	309.974	-0.108977	0.282012	0.622042	0.89078	309.974	0.0637269	0.259354	0.741201	0.940618
ENSMUSG00000103360	RP23-415C3.9	3.70113	0.0224067	0.326731	0.803253	0.950747	3.70619	0.163003	0.461007	0.310716	0.711813	3.70619	0.0655855	0.369484	0.559701	0.871406
ENSMUSG00000102691	RP23-415C3.8	6.24467	0.0198523	0.273356	0.823491	0.95665	19.5731	-0.119557	0.420878	0.531492	0.847363	19.5731	-0.123104	0.37369	0.391985	0.777424
ENSMUSG00000103232		6.28222	-0.134963	0.356416	0.222401	0.596829
ENSMUSG00000086358	Gm13270	11.3287	-0.0067047	0.215055	0.935884	0.986104	2.35674	0.0195761	0.435887	0.883932	0.973376	2.35674	-0.125176	0.403673	0.132423
ENSMUSG00000026726	Cubn	6.32489	-0.255173	0.496015	0.0776386	0.330657	55.8942	2.23487	0.724562	0.000140748	0.00387486	55.8942	2.82934	0.70502	4.4538e-06	0.000252931
ENSMUSG00000026723	Trdmt1	197.1	0.00436147	0.130309	0.952032	0.989801	194.713	-0.0585503	0.267363	0.78091	0.943406	194.713	-0.0783571	0.251793	0.679485	0.924944
ENSMUSG00000026728	Vim	2197.08	-0.872263	0.152602	1.21841e-09	8.03129e-08	533.388	-1.11903	0.357682	0.000189811	0.00497952	533.388	-0.697446	0.359737	0.00763077	0.094695
ENSMUSG00000003418	St8sia6	247.318	-0.0286338	0.118696	0.68259	0.915651	42.9866	-1.78266	0.620874	0.000218016	0.00558788	42.9866	-1.52073	0.644833	0.000784714	0.0177413
ENSMUSG00000104354		1.40306	-0.0171348	0.366776	0.841133
ENSMUSG00000063275	Ptpla	229.719	-0.0550695	0.146093	0.476769	0.820871	49.7675	-0.200405	0.398914	0.385158	0.768257	49.7675	-0.00480377	0.321425	0.977513	0.995506
ENSMUSG00000102553		13.6248	-0.204665	0.336991	0.0975893	0.37918
ENSMUSG00000103926		4.64431	0.14305	0.399219	0.206535	0.577154
ENSMUSG00000086657	Stamos	25.3413	-0.122713	0.233922	0.206628	0.577215	4.18199	0.0966749	0.434146	0.555821	0.860045	4.18199	0.0965641	0.375794	0.426483	0.801892
ENSMUSG00000026718	Stam	3133.11	0.0369241	0.0844706	0.501742	0.83531	370.809	-0.0864994	0.210617	0.641838	0.899476	370.809	-0.166266	0.208053	0.338109	0.736513
ENSMUSG00000103901	RP23-211O3.4	68.4554	0.00480909	0.150834	0.949459	0.988812	9.92339	-0.240682	0.386929	0.318096	0.717224	9.92339	-0.842896	0.671895	0.0143262	0.142269
ENSMUSG00000061531	Tmem236	2.72393	0.259702	0.57673	0.0643706	0.294673	1.79659	0.109862	0.46834	0.154129	0.528581	1.79659	0.0136713	0.376058	0.726488
ENSMUSG00000026712	Mrc1	42.529	-0.0296442	0.159146	0.702732	0.922028	29.1818	0.268018	0.38439	0.280104	0.684221	29.1818	0.0538847	0.308302	0.772366	0.949475
ENSMUSG00000103475		1.61574	-0.0437632	0.376962	0.617931
ENSMUSG00000057914	Cacnb2	7.71329	0.0956997	0.287497	0.332209	0.711233	1.91107	-0.0658264	0.451031	0.510362	0.838038	1.91107	-0.0668405	0.383587	0.320624
ENSMUSG00000070271	Gm13268	2.14229	-0.0564824	0.370295	0.537124	0.854837	3.5601	-0.0537365	0.431732	0.714213	0.923516	3.5601	0.0165355	0.363504	0.879375	0.973217
ENSMUSG00000026707	Nsun6	337.45	-0.157565	0.129098	0.0557427	0.269334	55.4086	0.295521	0.316439	0.219031	0.618342	55.4086	-0.0215414	0.266691	0.908632	0.980405
ENSMUSG00000103778		9.0644	-0.133163	0.366081	0.228269	0.604836
ENSMUSG00000017418	Arl5b	4335.85	0.942712	0.0999002	7.88619e-22	2.86292e-19	1390.66	0.495032	0.36327	0.063676	0.337456	1390.66	0.866963	0.408964	0.00382914	0.0593428
ENSMUSG00000102258	RP23-379F6.3	66.1855	0.208779	0.291505	0.0789763	0.334221	4.68375	0.0823113	0.441789	0.557815	0.861021	4.68375	0.0742795	0.376622	0.459603	0.819565
ENSMUSG00000075520	Malrd1	6.44643	0.0656514	0.309236	0.491018	0.828858	0.895472	-0.0502685	0.453169	0.429263		0.895472	-0.0041106	0.375191	0.939702
ENSMUSG00000103865		14.6198	2.40379	0.686136	3.47412e-06	0.000108893
ENSMUSG00000026748	Plxdc2	204.486	0.654845	0.175169	3.66145e-06	0.000114176	32.6674	-0.843898	0.967052	0.0219545	0.175884	32.6674	-0.0529891	0.343288	0.729786	0.938933
ENSMUSG00000053702	Nebl	13.3076	0.178112	0.347087	0.135109	0.458298	6.39679	-0.244688	0.514513	0.141882	0.509458	6.39679	-0.351485	0.659867	0.00463252	0.0679381
ENSMUSG00000054057	A930004D18Rik	316.273	-0.140833	0.130634	0.0823161	0.342614	8.25829	-0.0939847	0.433817	0.560515	0.862619	8.25829	-0.0537909	0.364546	0.651733	0.913559
ENSMUSG00000085319		4.9284	0.106645	0.342026	0.304845	0.686551
ENSMUSG00000054074	Skida1	351.84	0.25987	0.152742	0.00941061	0.0792022	13.3146	-0.153444	0.445014	0.389791	0.771253	13.3146	-0.165084	0.403911	0.21729	0.612837
ENSMUSG00000086340		5.67052	-0.00173997	0.269755	0.984281	0.996627
ENSMUSG00000026743	Mllt10	2436.06	-0.0176244	0.0862261	0.754807	0.939033	333.713	-0.384816	0.30642	0.105686	0.442192	333.713	-0.544566	0.336014	0.0236573	0.193995
ENSMUSG00000099050		6.46642	-0.115325	0.357166	0.277461	0.658659
ENSMUSG00000092814	Gm23638	2.13473	0.165084	0.489417	0.143068	0.474066	8.53924	-0.128622	0.449382	0.400443	0.777479	8.53924	-0.0551547	0.36755	0.613112	0.896941
ENSMUSG00000064964		1.39123	-0.056129	0.419294	0.486029
ENSMUSG00000081619	Gm13351	3.00444	-0.0201167	0.312301	0.823371	0.95665	36.6214	-0.332039	0.490281	0.16291	0.54268	36.6214	-0.469872	0.654916	0.0403654	0.264364
ENSMUSG00000026740	Dnajc1	653.807	0.0169106	0.0832202	0.757591	0.939819	61.918	0.10335	0.320441	0.655604	0.904607	61.918	-0.206903	0.324569	0.304246	0.706646
ENSMUSG00000082520	Gm13349	3.10949	-0.0612088	0.315265	0.518561	0.844052	1.81572	0.131749	0.48075	0.109848	0.451525	1.81572	0.096408	0.397187	0.0735716
ENSMUSG00000051154	Commd3	759.817	-0.145951	0.141864	0.085277	0.349544	527.202	0.213015	0.282508	0.346075	0.740843	527.202	0.283413	0.286946	0.175662	0.559691
ENSMUSG00000026739	Bmi1	583.133	-0.0697769	0.116892	0.324445	0.702471	82.4523	-0.788599	0.443961	0.0122994	0.11996	82.4523	-0.541976	0.430778	0.0376495	0.253219
ENSMUSG00000037708		3.24806	-0.0238981	0.306556	0.79147	0.947528
ENSMUSG00000026737	Pip4k2a	199.506	0.147232	0.1677	0.104657	0.395645	25.4307	-0.326847	0.463296	0.186493	0.577466	25.4307	-0.692378	0.784208	0.0241701	0.19666
ENSMUSG00000026736		2.81306	-0.104469	0.392915	0.30745	0.689208
ENSMUSG00000037683		6.20016	0.0264711	0.267615	0.766093	0.942019
ENSMUSG00000023094	Msrb2	322.273	-0.0716375	0.134134	0.346617	0.723484	218.819	-0.919761	0.629477	0.0127856	0.122739	218.819	-0.406328	0.48683	0.0802003	0.38524
ENSMUSG00000056329		1.22533	-0.0338037	0.375043	0.694873
ENSMUSG00000043415	Otud1	251.883	0.0939574	0.12606	0.212674	0.585382	13.758	-0.184112	0.433355	0.373823	0.759784	13.758	-0.250699	0.443709	0.141373	0.506002
ENSMUSG00000036617	Etl4	2741.91	-0.0608769	0.149318	0.437344	0.796072	398.088	0.157789	0.317144	0.501247	0.832152	398.088	-0.0863847	0.286443	0.648826	0.912118
ENSMUSG00000082164	Gm13360	8.38496	1.11414	0.806956	0.00170889	0.0213265	3.07027	0.246456	0.551661	0.0230451	0.181571	3.07027	0.101613	0.393783	0.203322	0.596481
ENSMUSG00000081128	Gm13328	2.03284	-0.0453556	0.345258	0.620869	0.890045	0.840043	-0.059523	0.457254	0.448457		0.840043	-0.0260314	0.378468	0.647033
ENSMUSG00000085477	Gm13335	4.69661	0.524721	0.760354	0.0153792	0.113664	3.809	0.120997	0.461824	0.310754	0.711813	3.809	0.0610546	0.378069	0.451762	0.815385
ENSMUSG00000098575		1.94946	-0.0241541	0.369417	0.778226	0.944597
ENSMUSG00000086418	Gm13362	5.73765	0.0579542	0.280306	0.532075	0.852302	3.01783	-0.115013	0.44049	0.484123	0.823817	3.01783	-0.114877	0.384871	0.3343	0.733906
ENSMUSG00000036591	Arhgap21	2028.47	-0.0330957	0.137901	0.657621	0.905635	220.057	-0.227383	0.308344	0.327633	0.724764	220.057	-0.228363	0.29869	0.263855	0.669043
ENSMUSG00000085206	Gm13380	4.3619	0.0750982	0.329725	0.440611	0.798143	1.07362	-0.0687491	0.458745	0.360485		1.07362	-0.0619073	0.386647	0.198801
ENSMUSG00000075514	Gm13375	35.5527	-0.0606727	0.175657	0.459605	0.809308	1.19034	-0.0620899	0.450409	0.558146		1.19034	-0.0232319	0.37483	0.72294
ENSMUSG00000026679	Enkur	2.96619	0.0489717	0.353031	0.593485	0.88028	1.04355	0.108076	0.464005	0.34868		1.04355	0.0893724	0.390319	0.244718
ENSMUSG00000048550	Thnsl1	587.877	0.0609568	0.106631	0.35848	0.733405	77.3375	0.143272	0.287431	0.526714	0.845695	77.3375	0.268273	0.296639	0.201835	0.594521
ENSMUSG00000081467		2.34777	-0.0015467	0.317381	0.986194	0.996627
ENSMUSG00000025716		1.25251	-0.0842978	0.425351	0.348993
ENSMUSG00000083863	Gm13341	2.48111	-0.0988868	0.412775	0.314122	0.693982	1.98025	-0.00819243	0.445745	0.923819	0.981917	1.98025	-0.0508065	0.381581	0.374093
ENSMUSG00000083563	Gm13340	21.1215	-0.387008	0.43	0.0233085	0.15111	23.0461	0.0492587	0.418662	0.775151	0.94217	23.0461	0.0796972	0.36655	0.534398	0.85985
ENSMUSG00000026787	Gad2	3.19155	0.586967	0.959915	0.00350311	0.0375523	1.49015	-0.00940771	0.444731	0.923103		1.49015	-0.0328572	0.377496	0.575302
ENSMUSG00000069136		3.6754	-0.168902	0.455949	0.154673	0.494772
ENSMUSG00000026784	Pdss1	560.797	-0.0732226	0.0978485	0.240858	0.618823	358.783	-0.298673	0.343411	0.222077	0.6209	358.783	-0.0929481	0.28507	0.627717	0.903804
ENSMUSG00000084625	Gm25544	4.32101	-0.0802445	0.333425	0.414755	0.778993	1.98769	-0.0366652	0.446204	0.711623	0.922851	1.98769	-0.0341291	0.376467	0.611194
ENSMUSG00000081861	Gm14441	9.4548	0.00878092	0.255202	0.919921	0.982431	8.80943	0.0827863	0.44385	0.539331	0.851635	8.80943	0.0377147	0.370296	0.690567	0.929342
ENSMUSG00000058835	Abi1	2328.54	-0.00624512	0.0976078	0.919899	0.982431	400.914	-0.222283	0.25807	0.296809	0.698329	400.914	-0.369502	0.275043	0.0761912	0.37531
ENSMUSG00000083650	Gm13357	9.70388	-0.0179796	0.231831	0.833297	0.959719	0.666396	0.0717512	0.459508	0.451106		0.666396	0.0480295	0.382402	0.471264
ENSMUSG00000026781	Acbd5	1149.7	-0.031678	0.0964538	0.606388	0.884986	369.701	2.34359	0.247723	2.4432e-22	2.89229e-19	369.701	0.799987	0.254219	0.000274077	0.0080273
ENSMUSG00000026779	Mastl	2256.3	-0.135456	0.123101	0.0825877	0.343168	360.788	0.161458	0.275565	0.467315	0.813774	360.788	0.0490304	0.251014	0.795744	0.954157
ENSMUSG00000026775	Yme1l1	10776.2	-0.0233856	0.109702	0.727061	0.930158	1120.43	0.0118855	0.255984	0.956068	0.989651	1120.43	0.0422353	0.240801	0.823262	0.961815
ENSMUSG00000081648	Gm13423	10.1725	-0.153253	0.323565	0.171879	0.524214	4.85983	0.228154	0.516821	0.106664	0.444419	4.85983	0.103396	0.38826	0.27467	0.6804
ENSMUSG00000026774	4931423N10Rik	7.84595	0.126069	0.320317	0.23722	0.614369	1.95988	0.246557	0.545187	0.0494606	0.290907	1.95988	0.137995	0.410231	0.115377
ENSMUSG00000084098		3.39971	0.180368	0.461729	0.140042	0.468857
ENSMUSG00000102704	RP23-183O12.1	8.93872	0.0039374	0.232408	0.963128	0.991596	2.81089	0.139026	0.463954	0.300503	0.702837	2.81089	-0.0543514	0.375406	0.553565
ENSMUSG00000026771	Spopl	899.742	0.0440029	0.106049	0.503876	0.836387	68.6476	-0.0176711	0.297635	0.935602	0.984688	68.6476	-0.0671319	0.277342	0.723865	0.937651
ENSMUSG00000026986	Hnmt	3.26354	1.65072	1.3717	0.000117665	0.00230247	2.65808	-0.0305693	0.436297	0.811291	0.952894	2.65808	-0.115145	0.397284	0.179176
ENSMUSG00000083116		49.2837	-0.0499266	0.169518	0.534241	0.853442
ENSMUSG00000026979	Psd4	91.0235	0.815294	0.27116	6.27821e-05	0.00137448	20.1263	0.293483	0.463396	0.213873	0.612987	20.1263	0.247436	0.418095	0.175087	0.558973
ENSMUSG00000026976	Pax8	12.5973	-0.0297162	0.220571	0.725929	0.930017	1.56251	0.104689	0.458499	0.363067		1.56251	-0.0111124	0.37363	0.896029
ENSMUSG00000004113	Cacna1b	59.7258	0.896746	0.297116	6.41984e-05	0.00140042	4.5646	0.102459	0.449419	0.446524	0.803107	4.5646	0.0380424	0.370211	0.691108	0.92956
ENSMUSG00000036893	Ehmt1	1524.37	-0.0129056	0.0935852	0.830338	0.95908	497.068	0.411408	0.244548	0.0500703	0.29262	497.068	0.185391	0.223184	0.311635	0.713537
ENSMUSG00000103162	RP23-358I10.3	14.9193	-0.0979423	0.281958	0.320372	0.699152	5.83164	0.567574	0.937671	0.026564	0.198324	5.83164	-0.141534	0.400907	0.213019	0.607542
ENSMUSG00000102875	RP23-358I10.4	22.7359	0.00930034	0.19059	0.908145	0.979572	6.11799	0.195714	0.477418	0.244484	0.647833	6.11799	0.00732751	0.363167	0.945982	0.987376
ENSMUSG00000026972	Arrdc1	225.797	-0.159343	0.145778	0.0679246	0.303996	134.771	1.89864	0.398404	1.41877e-07	1.00272e-05	134.771	1.38597	0.4092	5.09251e-05	0.00205578
ENSMUSG00000026974	Zmynd19	1468.26	-0.0101305	0.0696166	0.828481	0.958665	225.85	0.571529	0.360768	0.0346351	0.233606	225.85	0.0902793	0.27136	0.642376	0.908635
ENSMUSG00000026975	Dph7	631.82	0.00294628	0.0978696	0.962232	0.991434	287.02	0.336676	0.275772	0.135738	0.497758	287.02	0.299056	0.269434	0.144568	0.510313
ENSMUSG00000036850	Mrpl41	307.96	-0.125252	0.155966	0.144722	0.477039	406.261	0.755317	0.375781	0.00900651	0.0964343	406.261	0.348903	0.32672	0.117239	0.462688
ENSMUSG00000036833	Pnpla7	221.04	0.0698211	0.141767	0.368801	0.740616	72.6467	0.984521	0.551716	0.00796871	0.0889424	72.6467	0.836065	0.57618	0.0124337	0.12906
ENSMUSG00000084383	Gm13370	1.22354	-0.0210848	0.3934	0.791907		40.2984	0.18192	0.433514			40.2984	0.0666404	0.351168
ENSMUSG00000006476	Nsmf	99.3314	0.00438327	0.122513	0.950573	0.98921	11.3632	3.12789	0.955781	6.28111e-05	0.00196321	11.3632	2.27789	1.04719	0.00117775	0.0245105
ENSMUSG00000036805	Noxa1	3.54525	0.201973	0.506213	0.109033	0.405754	1.20644	0.0535139	0.451983	0.646859		1.20644	0.0901181	0.392796	0.163632
ENSMUSG00000087028		2.0685	0.212435	0.539456	0.0904839	0.361445
ENSMUSG00000078202	Nrarp	39.2271	0.256518	0.268371	0.037702	0.207519	0.434476	-0.0416909	0.457268	0.617722		0.434476	0.0114241	0.378273	0.851065
ENSMUSG00000059555	Tor4a	262.507	-0.0459968	0.10562	0.483716	0.825968	36.8545	-0.398019	0.358524	0.11902	0.469182	36.8545	-0.0938183	0.280432	0.623068	0.900933
ENSMUSG00000013465	Nelfb	1950.26	0.0304342	0.0887552	0.596979	0.881099	305.664	-0.0353064	0.291223	0.871316	0.969375	305.664	-0.0123782	0.267983	0.947483	0.987493
ENSMUSG00000064919		11.2897	-0.0249672	0.213831	0.765679	0.941999
ENSMUSG00000036770	4933433C11Rik	15.3517	0.0359963	0.207383	0.667089	0.909686	1.64524	0.0146715	0.443822	0.882448		1.64524	0.0377898	0.375288	0.626159
ENSMUSG00000026969	Fam166a	63.8128	0.0397892	0.146992	0.603213	0.883192	2.00109	-0.00629143	0.449049	0.837481	0.960118	2.00109	0.0495886	0.381338	0.377856
ENSMUSG00000036752	Tubb4b	13066.5	-0.0413715	0.130225	0.573297	0.872601	7258.15	-0.0959694	0.319438	0.658689	0.905346	7258.15	0.0213669	0.28528	0.90927	0.980405
ENSMUSG00000006469	Slc34a3	19.0581	-0.0530818	0.198407	0.527576	0.849676	40.8341	-0.0317628	0.358105	0.885706	0.974055	40.8341	1.01815	0.649722	0.00805865	0.0980439
ENSMUSG00000089953	Rnf224	14.5671	-0.0270727	0.205982	0.744267	0.936522	5.80875	-0.0290164	0.426025	0.847896	0.962215	5.80875	0.216691	0.44438	0.103377	0.437564
ENSMUSG00000036731	Cysrt1	10.904	-0.0117613	0.238214	0.891067	0.975753	6.31347	-2.07697	1.96595	0.00592617	0.0725113	6.31347	-0.0529392	0.363417	0.656401	0.915857
ENSMUSG00000044628	Rnf208	60.3713	-0.272688	0.252045	0.026808	0.16579	16.1135	-0.527369	0.561479	0.0686953	0.350527	16.1135	-0.14706	0.348093	0.404071	0.786865
ENSMUSG00000006471	Ndor1	196.769	-0.112272	0.15937	0.187167	0.547762	52.1739	0.0879024	0.328321	0.704033	0.920163	52.1739	0.080623	0.298703	0.673033	0.922996
ENSMUSG00000078201	Tmem203	65.3529	-0.0947784	0.177885	0.270802	0.65144	14.0246	-0.131817	0.36524	0.564293	0.865361	14.0246	-0.133553	0.334408	0.46746	0.824613
ENSMUSG00000048707	Tprn	414.919	-0.818329	0.167203	6.22235e-08	2.92174e-06	117.662	-0.332862	0.443716	0.186189	0.577072	117.662	-0.384647	0.484701	0.0839079	0.392689
ENSMUSG00000026966	Ssna1	795.087	-0.401223	0.215367	0.00234987	0.0275189	700.351	-0.358271	0.19915	0.0446368	0.271855	700.351	-0.0299812	0.18158	0.849118	0.967311
ENSMUSG00000026965	Anapc2	814.246	-0.0095743	0.214994	0.908588	0.979678	363.31	-0.0985058	0.290194	0.657991	0.905164	363.31	0.102323	0.270317	0.59691	0.890994
ENSMUSG00000026963		6.00736	-0.576483	0.743798	0.0131945	0.100826
ENSMUSG00000026961		12.108	-0.213771	0.386879	0.100124	0.385215
ENSMUSG00000026959	Grin1	386.852	-1.83309	0.144494	5.45566e-38	8.84654e-35	1.27472	-0.0331735	0.449386	0.581926		1.27472	-0.0134079	0.375761	0.822381
ENSMUSG00000085830		14.0086	-1.19802	0.688253	0.000862718	0.0122928
ENSMUSG00000036646	Man1b1	2827.89	-0.268944	0.128847	0.00406384	0.0420616	134.402	-0.134322	0.2381	0.506347	0.835647	134.402	-0.348359	0.257013	0.0816491	0.388008
ENSMUSG00000088171		3.33568	-0.0611291	0.357234	0.514652	0.842543
ENSMUSG00000026958	Dpp7	1652.63	-0.0589481	0.111872	0.389543	0.759142	317.31	-0.106878	0.342386	0.639192	0.898264	317.31	0.191018	0.333985	0.339047	0.737235
ENSMUSG00000026956	Uap1l1	2757.84	-0.122626	0.113574	0.0938615	0.369895	656.134	0.125921	0.329651	0.590871	0.876864	656.134	0.520513	0.444521	0.0477022	0.290271
ENSMUSG00000026955	Sapcd2	672.528	-0.00438589	0.0962211	0.943131	0.987461	231.476	1.43456	0.501845	0.000353221	0.00832135	231.476	1.95203	0.494286	4.86514e-06	0.000273502
ENSMUSG00000015085	Entpd2	24.4704	0.0870989	0.224828	0.33834	0.716742	7.30439	0.00950229	0.429918	0.948756	0.987709	7.30439	0.0237939	0.365997	0.818991	0.960401
ENSMUSG00000015094	Npdc1	129.702	-0.0866308	0.188504	0.316591	0.696049	75.5831	1.12376	0.592659	0.00512632	0.0649483	75.5831	1.25556	0.60795	0.00229004	0.0406841
ENSMUSG00000036587		2.98504	0.0192964	0.322712	0.829971	0.95908
ENSMUSG00000026944	Abca2	696.47	0.076897	0.146205	0.331247	0.7098	58.4587	0.0712469	0.392101	0.733586	0.929577	58.4587	-0.0927422	0.352014	0.548396	0.86721
ENSMUSG00000047617	BC029214	52.8532	-0.1181	0.207066	0.204414	0.574063	22.9277	0.0754799	0.346647	0.743919	0.932841	22.9277	0.167528	0.334727	0.387246	0.773523
ENSMUSG00000015093		18.8713	-0.0133561	0.205301	0.871204	0.970976
ENSMUSG00000015090		15.4984	0.173483	0.317605	0.133046	0.454442
ENSMUSG00000015083	C8g	73.9009	-0.00257356	0.139529	0.97233	0.993941	34.2798	0.0168841	0.31597	0.942579	0.985987	34.2798	0.296657	0.346958	0.176352	0.560523
ENSMUSG00000015095	Fbxw5	646.997	0.046219	0.0945731	0.444425	0.800129	158.534	-0.279316	0.288314	0.219668	0.618952	158.534	-0.125018	0.256851	0.512898	0.848456
ENSMUSG00000026942	Traf2	521.409	-0.098854	0.11903	0.177467	0.534026	126.9	0.32037	0.242665	0.121718	0.474321	126.9	0.229499	0.231616	0.2206	0.617292
ENSMUSG00000083043		7.3862	-0.0572457	0.300306	0.541587	0.857419
ENSMUSG00000015092	Edf1	1598.24	-0.0923484	0.131681	0.230231	0.606722	701.445	0.000599176	0.21659	0.999356	0.999865	701.445	0.0566012	0.207416	0.742301	0.941034
ENSMUSG00000026941	Mamdc4	193.224	-0.0286467	0.112123	0.673196	0.91199	11.6685	0.144612	0.372734	0.528847	0.846318	11.6685	0.109093	0.331075	0.543645	0.864205
ENSMUSG00000036504	Phpt1	22.469	-0.119206	0.256995	0.230255	0.606722	21.3476	0.067755	0.347053	0.76797	0.93955	21.3476	-0.0222811	0.308888	0.901133	0.978589
ENSMUSG00000029419	Gm996	19.0448	0.0458562	0.211556	0.589124	0.878956	1.59587	0.0195205	0.439155	0.871331		1.59587	-0.0338701	0.373608	0.680756
ENSMUSG00000015087	Rabl6	1972.3	-0.0211011	0.0835276	0.700559	0.92103	134.161	-0.11701	0.320562	0.609345	0.886988	134.161	-0.110536	0.295894	0.563451	0.873541
ENSMUSG00000052403		3.69626	-0.0482127	0.349523	0.599773	0.882278
ENSMUSG00000026940	Ccdc183	5.4063	-0.0179482	0.277544	0.84045	0.962039	0.619442	-0.0173805	0.452493	0.662382		0.619442	-0.00839405	0.378092	0.891639
ENSMUSG00000026939	Tmem141	69.1049	0.25218	0.275836	0.0418787	0.223577	19.9804	0.133274	0.383612	0.54981	0.856227	19.9804	0.572971	0.630555	0.0410788	0.266512
ENSMUSG00000026938		4.79678	0.16494	0.409662	0.166383	0.514813
ENSMUSG00000087612		2.59802	0.121086	0.426449	0.246157	0.624847
ENSMUSG00000049086	Bmyc	22.1032	-0.0694361	0.234767	0.439769	0.797651	41.9008	-0.200832	0.335301	0.394562	0.773323	41.9008	-0.128955	0.299656	0.504962	0.84344
ENSMUSG00000059625	Sohlh1	4.0936	0.799045	1.01645	0.00329609	0.0358385	1.17192	0.0899134	0.465249	0.369046		1.17192	0.080998	0.392211	0.108553
ENSMUSG00000058740	Kcnt1	47.5692	1.96591	0.344956	6.01371e-10	4.22897e-08	1.32761	0.0131068	0.443113	0.901003		1.32761	0.0185643	0.373653	0.803125
ENSMUSG00000026933	Camsap1	1705.67	0.00464891	0.0927339	0.938091	0.986663	248.612	-0.181715	0.263942	0.397596	0.775703	248.612	-0.253495	0.266485	0.204854	0.598102
ENSMUSG00000082357		4.03744	0.0897813	0.348623	0.371139	0.742868
ENSMUSG00000036352	Ubac1	1698.68	-0.0180832	0.0921995	0.761266	0.941011	266.007	0.151367	0.236397	0.458437	0.808497	266.007	0.177968	0.230393	0.340005	0.738024
ENSMUSG00000026932	Nacc2	120.674	0.0666569	0.134268	0.379269	0.750095	32.3428	0.466352	0.503525	0.100105	0.430621	32.3428	0.216226	0.37191	0.267308	0.672853
ENSMUSG00000087679	C330006A16Rik	363.898	-0.0988572	0.114786	0.167691	0.516885	256.354	-0.309425	0.348555	0.208637	0.606835	256.354	-0.407628	0.381256	0.0813155	0.387903
ENSMUSG00000087595		11.4761	-0.07742	0.24946	0.402264	0.767803
ENSMUSG00000098977		2.04525	0.242827	0.594685	0.0591567	0.279491
ENSMUSG00000036327	Qsox2	1746.67	0.151874	0.123633	0.0575094	0.27497	232.919	-0.224033	0.271211	0.30674	0.70741	232.919	0.0803646	0.243676	0.670602	0.921926
ENSMUSG00000048038	4932418E24Rik	6.62986	-0.0569833	0.257482	0.530196	0.851556	2.15237	0.165154	0.480128	0.200655	0.596651	2.15237	-0.00246491	0.371394	0.977912
ENSMUSG00000026930	Gpsm1	156.699	0.0441319	0.111825	0.516997	0.843342	23.7882	0.13179	0.378149	0.558116	0.861093	23.7882	-0.161469	0.358032	0.362625	0.753999
ENSMUSG00000075467	Dnlz	314.034	-0.0276695	0.11728	0.690862	0.918393	178.317	-0.18229	0.261011	0.394818	0.773586	178.317	-0.0663842	0.238602	0.720955	0.937099
ENSMUSG00000026928	Card9	31.0548	-0.0185964	0.172244	0.813336	0.953358	4.7904	-0.00593461	0.416404	0.970031	0.991946	4.7904	-0.0175754	0.357488	0.885107	0.973938
ENSMUSG00000086779	Gm13562	61.1368	-0.0203294	0.137671	0.784018	0.94624	9.64061	-0.204926	0.458323	0.294754	0.696286	9.64061	-0.219585	0.434294	0.137133	0.499
ENSMUSG00000036281	Snapc4	1415.08	-0.00357503	0.0744649	0.942878	0.987389	90.7415	-0.0138239	0.297501	0.949146	0.987709	90.7415	-0.175337	0.296627	0.376655	0.766441
[truncated: 26,060 more rows]

## Sheet: TEs
# Supplementary Table 8
# TE expression in mESC Obox induced versus non-induced
Name	Family	baseMean_Obox4OE	log2FoldChange_Obox4OE	lfcSE_Obox4OE	pvalue_Obox4OE	padj_Obox4OE	baseMean_Obox3OE	log2FoldChange_Obox3OE	lfcSE_Obox3OE	pvalue_Obox3OE	padj_Obox3OE	baseMean_Obox5OE	log2FoldChange_Obox5OE	lfcSE_Obox5OE	pvalue_Obox5OE	padj_Obox5OE
L1_Mus3	L1	17452	-0.00543637	0.0321077	0.56348	0.99737	8420.36	0.0812978	0.392982	0.642845	0.913174	8420.36	0.00770366	0.330537	0.920025	0.985776
L1Md_F	L1	1513.99	-0.00504025	0.0327225	0.653405	0.99737	2218.84	0.0723262	0.41215			2218.84	0.0446271	0.346599
L1_Rod	L1	2944	-0.0105858	0.0353437	0.612312	0.99737	822.788	0.0639094	0.299113	0.769384	0.950682	822.788	-0.155096	0.292656	0.398058	0.819919
Lx9	L1	14226.5	-0.00709708	0.0313728	0.615438	0.99737	4044.78	0.000230015	0.302553	0.997067	0.999152	4044.78	-0.268462	0.339694	0.177614	0.605429
L1M4	L1	7453.63	-0.00686455	0.0336326	0.907222	0.99737	1666	-0.0251281	0.30104	0.89907	0.979417	1666	-0.288767	0.34502	0.155261	0.568471
L1_Mur2	L1	4735.93	0.000971332	0.0333729	0.909712	0.99737	1456.73	0.099883	0.301801	0.650608	0.914947	1456.73	-0.179037	0.299099	0.337204	0.77925
RLTR26B_MM	ERVK	139.552	0.008818	0.0355933	0.158841	0.99737	15.7567	0.425122	0.563363	0.0855094	0.41372	15.7567	0.123458	0.344645	0.391796	0.814543
RLTR25A	ERVK	764.248	0.00875663	0.0338884	0.438316	0.99737	174.147	0.0886108	0.307208	0.684201	0.927083	174.147	-0.105331	0.286182	0.553226	0.897924
L1M2	L1	5846.68	-0.00427226	0.0334806	0.621911	0.99737	1567.3	0.0245464	0.300304	0.912138	0.982565	1567.3	-0.201348	0.310159	0.286208	0.734526
B3	B2	144069	0.00931418	0.0316941	0.591431	0.99737	23465.6	0.0513509	0.272332	0.820623	0.962822	23465.6	-0.258594	0.294064	0.187879	0.62053
L1VL1	L1	1217.03	-0.0135204	0.0372963	0.228197	0.99737	1000.44	0.0556325	0.399162			1000.44	0.00660988	0.337313
L1Md_F2	L1	27232.4	0.00137918	0.0312489	0.918382	0.99737	23409.4	0.054525	0.41142			23409.4	0.0253666	0.345643
ERVB7_1-LTR_MM	ERVK	5627.91	-0.00935598	0.0362262	0.0311973	0.582173	262.785	-0.12278	0.341611	0.563462	0.883232	262.785	-0.110637	0.308384	0.515144	0.884774
L1MEf	L1	1184	-0.00305189	0.0328004	0.78568	0.99737	265.761	-0.11282	0.287974	0.596858	0.895297	265.761	-0.461789	0.370641	0.0476051	0.312992
RLTR14	ERV1	932.152	0.00314965	0.031995	0.796892	0.99737	146.185	0.689923	0.357315	0.0112298	0.118163	146.185	0.110806	0.260224	0.544284	0.895038
RMER17A	ERVK	456.646	-0.000562931	0.033982	0.925408	0.99737	152.467	-0.0497599	0.33535	0.808503	0.959303	152.467	-0.236175	0.366205	0.199883	0.639643
RLTR13E	ERVK	697.595	0.00583345	0.0337333	0.529007	0.99737	79.3637	0.354183	0.338255	0.140875	0.535367	79.3637	0.107269	0.272232	0.553249	0.897924
Lx2	L1	4362.25	0.00474466	0.0321881	0.84811	0.99737	2056.54	0.0400293	0.338573	0.836135	0.96646	2056.54	-0.164059	0.334985	0.337971	0.779965
IAPLTR1a_Mm	ERVK	323.914	0.00584422	0.0339718	0.50955	0.99737	146.683	0.3678	0.414929	0.142296	0.537836	146.683	0.0724003	0.297193	0.672264	0.937225
ERVB7_3-LTR_MM	ERVK	251.457	0.00433054	0.0345822	0.360736	0.99737	20.514	0.0912162	0.368842	0.645911	0.913874	20.514	-0.0553013	0.320043	0.710705	0.946931
ID_B1	B4	83250.5	-0.00367596	0.0314555	0.781809	0.99737	11109.2	0.0851331	0.268532	0.688307	0.928177	11109.2	-0.218143	0.276578	0.258404	0.706393
L1Md_A	L1	32216	-0.0535764	0.11605	0.0120349	0.456913	9138.51	0.0600847	0.408185			9138.51	0.0300609	0.343707
RLTR1D	ERV1	169.524	-0.0095647	0.0357753	0.163093	0.99737	27.0799	0.109502	0.339728	0.609424	0.900429	27.0799	0.0357235	0.296568	0.830816	0.971197
MER44D	TcMar-Tigger	403.856	-0.00461464	0.0333453	0.642746	0.99737	85.9002	-0.0137182	0.318147	0.942707	0.988882	85.9002	-0.316405	0.389726	0.123072	0.506322
Tigger7	TcMar-Tigger	3351.96	-0.00647007	0.0321357	0.624576	0.99737	652.307	-0.0658698	0.297736	0.757721	0.948307	652.307	-0.285858	0.335344	0.160784	0.576647
RLTR13C1	ERVK	204.173	-0.0134557	0.0371105	0.13508	0.99737	45.9075	0.164676	0.293958	0.452478	0.833544	45.9075	0.149155	0.275601	0.421475	0.833608
MER74B	ERVL	124.457	-0.00810837	0.0351732	0.239676	0.99737	23.1111	-0.0701519	0.344474	0.731442	0.942885	23.1111	-0.148206	0.331486	0.373126	0.802939
ID4_	ID	17058.6	-0.0218815	0.0378787	0.211845	0.99737	2582.35	0.0755206	0.282309	0.726126	0.94161	2582.35	-0.214462	0.291592	0.263521	0.712396
MLT1A1	ERVL-MaLR	2511.99	-0.000263873	0.0315612	0.983755	0.99737	471.304	0.100842	0.290118	0.638959	0.911736	471.304	-0.167411	0.284787	0.368442	0.79975
Lx4B	L1	2519.83	-0.009214	0.0338512	0.491007	0.99737	938.827	0.0925839	0.346066	0.659709	0.91874	938.827	-0.0512374	0.304436	0.757784	0.960119
B4A	B4	64552.1	-0.00431202	0.0305763	0.766599	0.99737	10912.9	0.050252	0.284974	0.797385	0.958051	10912.9	-0.234342	0.302822	0.22883	0.675145
BGLII_Mur	ERVK	316.382	-0.0139026	0.0368961	0.169349	0.99737	59.0027	-0.0553462	0.315878	0.792845	0.956477	59.0027	-0.24511	0.34601	0.202374	0.64353
L1_Mur3	L1	8764.89	0.00253174	0.0331264	0.79459	0.99737	3119.9	0.0172029	0.317597	0.938261	0.987347	3119.9	-0.211222	0.334013	0.257849	0.706008
B2_Mm2	B2	82869.9	-0.00593905	0.0327787	0.614183	0.99737	92660.5	0.0407778	0.403752			92660.5	-0.00602666	0.341414
B1_Mus1	Alu	71947.4	0.000724617	0.0320911	0.366594	0.99737	37564.9	0.170777	0.435991			37564.9	0.0468313	0.339948
Lx7	L1	12044.2	-0.00407685	0.0320703	0.747491	0.99737	3388.29	0.0405118	0.296255	0.866545	0.971955	3388.29	-0.233264	0.315253	0.229198	0.67529
ERVB4_2-LTR_MM	ERVK	210.408	0.00754871	0.0354819	0.0774646	0.879263	36.4792	0.0671735	0.348548	0.747819	0.947196	36.4792	-0.21623	0.371151	0.214212	0.659189
RLTR45-int	ERVK	4215.02	0.291756	0.189624	0.00279605	0.192403	324.387	-0.197931	0.343973	0.373402	0.788518	324.387	-0.436154	0.449722	0.0609427	0.358861
PB1D10	Alu	49275.2	-0.0101444	0.0321801	0.27325	0.99737	6677.27	0.0439934	0.276565	0.823331	0.963833	6677.27	-0.19453	0.282343	0.298289	0.746478
ORR1E	ERVL-MaLR	8625.27	0.00308552	0.0318735	0.459566	0.99737	1390.5	0.117038	0.309623	0.593957	0.894979	1390.5	-0.102149	0.284273	0.563423	0.901188
PB1D11	Alu	13669.1	-0.014454	0.0343872	0.368027	0.99737	1737.9	0.0645362	0.269581	0.747943	0.9472	1737.9	-0.200343	0.275173	0.289997	0.739003
RLTR9D2	ERVK	97.128	0.00696406	0.0350451	0.225465	0.99737	15.1889	-0.0177799	0.364177	0.923132	0.984525	15.1889	-0.00124123	0.316747	0.9911	0.998623
B2_Mm1t	B2	29059.4	0.00198844	0.0336475	0.859908	0.99737	144718	0.0241566	0.405752			144718	-0.00762041	0.34361
Charlie2b	hAT-Charlie	339.229	-0.000306568	0.0335892	0.972906	0.99737	67.1723	-0.114757	0.310794	0.594549	0.894979	67.1723	-0.370249	0.386199	0.0900586	0.43752
Lx8	L1	20418.4	-0.00669476	0.0319693	0.854954	0.99737	7238.71	-0.0242441	0.348488	0.901864	0.980041	7238.71	-0.102715	0.321913	0.520495	0.888123
ORR1F	ERVL-MaLR	9486.47	0.00435437	0.0315953	0.74382	0.99737	1587.72	0.0847525	0.292634	0.69547	0.930314	1587.72	-0.147033	0.283042	0.424062	0.835291
RSINE1	B4	94519.4	0.00131859	0.0321253	0.912232	0.99737	14745.4	0.0832592	0.288313	0.701603	0.932664	14745.4	-0.191288	0.290754	0.324611	0.768702
MTEa	ERVL-MaLR	7548.2	0.00330774	0.0319291	0.7223	0.99737	1320.23	0.118553	0.286525	0.574968	0.88818	1320.23	-0.144899	0.27446	0.428371	0.837462
B1F	Alu	34430.5	-0.0212273	0.0372944	0.339433	0.99737	4510.38	0.0799067	0.263747	0.693097	0.929749	4510.38	-0.198279	0.267459	0.293054	0.741672
MT2_Mm	ERVL	6092.7	1.23878	0.164719	2.57963e-15	2.84017e-12	6266.21	2.20456	1.12583	0.00182715	0.0323827	6266.21	0.622977	2.05904	0.00980157	0.117561
L1_Mur1	L1	1810	0.00642321	0.0342845	0.532527	0.99737	507.15	0.0545793	0.322777	0.804638	0.958133	507.15	-0.154231	0.315324	0.387335	0.811912
RMER4B	ERVK	3363.53	-0.012614	0.0335024	0.374991	0.99737	526.622	0.0323641	0.282294	0.883158	0.975132	526.622	-0.278059	0.314301	0.167074	0.588137
RLTR10D	ERVK	346.616	0.00962439	0.0357704	0.143131	0.99737	40.4412	0.104339	0.308627	0.631122	0.908479	40.4412	-0.0910619	0.283515	0.607339	0.916873
Lx	L1	7643.68	-0.00228102	0.0312226	0.852884	0.99737	3900.28	0.0311385	0.343975	0.867132	0.972083	3900.28	-0.0647011	0.309843	0.710678	0.946931
Lx10	L1	1953.31	0.00128913	0.0316371	0.943063	0.99737	615.487	0.014441	0.310492	0.951851	0.990725	615.487	-0.190654	0.317767	0.304053	0.750834
MER119	hAT-Charlie	284.289	0.00227688	0.0337273	0.765662	0.99737	41.4746	0.22859	0.303911	0.307985	0.737431	41.4746	-0.273507	0.31714	0.173859	0.599444
B1_Mm	Alu	29191.1	-0.00117629	0.0326011	0.479988	0.99737	28178.5	0.182337	0.450745			28178.5	0.0492232	0.344122
L1Md_T	L1	34900.5	-0.00921451	0.0335784	0.396364	0.99737	64454.5	0.0309487	0.410165			64454.5	0.0316536	0.347478
L2a	L2	13808.8	-0.0131715	0.0354034	0.252051	0.99737	2368.93	-0.0182986	0.278292	0.925116	0.984716	2368.93	-0.279599	0.309189	0.165078	0.584287
MTD	ERVL-MaLR	27124.1	-0.0036995	0.0309065	0.789628	0.99737	4539.3	0.120404	0.287869	0.580196	0.88999	4539.3	-0.167064	0.280357	0.36786	0.799553
MTC	ERVL-MaLR	15834.4	-0.00567156	0.0307709	0.702283	0.99737	2385.05	0.139938	0.293803	0.512237	0.86225	2385.05	-0.152004	0.280134	0.410082	0.827356
L1M5	L1	6807.66	0.000151361	0.0327811	0.986693	0.99737	1450.66	0.0647254	0.29904	0.770348	0.950887	1450.66	-0.239918	0.320517	0.219086	0.664773
B1F2	Alu	14604.8	-0.0140114	0.0341	0.337151	0.99737	1949.49	0.0698598	0.275818	0.742185	0.945526	1949.49	-0.172922	0.274223	0.354808	0.793179
L1MC	L1	2580.11	-0.0048334	0.0338426	0.568904	0.99737	420.947	-0.0599963	0.300603	0.776254	0.951779	420.947	-0.226924	0.317262	0.240182	0.68616
L1MEg	L1	2027.8	0.0157339	0.0363024	0.252679	0.99737	630.487	0.0836137	0.311482	0.703092	0.933158	630.487	-0.0174202	0.278102	0.925579	0.985898
Lx5b	L1	1819.26	0.000925401	0.0322965	0.90778	0.99737	700.021	0.0359932	0.3064	0.870533	0.972266	700.021	-0.146436	0.298485	0.418967	0.832113
L1MB7	L1	5535.44	-0.00387952	0.0317915	0.757042	0.99737	1250.68	-0.0244879	0.31347	0.908649	0.981587	1250.68	-0.17827	0.315716	0.330034	0.774029
B3A	B2	68980.3	-0.00915039	0.0312605	0.545187	0.99737	11985.5	0.059807	0.277467	0.781294	0.953402	11985.5	-0.249354	0.297214	0.204472	0.6465
RMER15	ERVL	10285.3	0.00432232	0.0328097	0.858972	0.99737	1904.83	0.0856396	0.250493	0.680355	0.925986	1904.83	-0.216784	0.256784	0.24914	0.698056
RLTR20B4_MM	ERVK	130.511	0.000911451	0.0339882	0.848814	0.99737	29.4231	0.194719	0.386123	0.365865	0.785145	29.4231	0.0188257	0.309833	0.903848	0.981933
B1F1	Alu	15703	-0.0183794	0.0353502	0.398591	0.99737	2220.8	0.0552405	0.274657	0.795665	0.957292	2220.8	-0.246287	0.293151	0.208699	0.652531
MLT1A	ERVL-MaLR	1528.65	0.00689225	0.0338776	0.497537	0.99737	292.536	0.0797137	0.329325	0.712353	0.936789	292.536	-0.0934556	0.301414	0.581148	0.906863
RLTRETN_Mm	ERVK	1708.38	-0.0124518	0.0374633	0.0262279	0.553344	300.561	0.0192732	0.340498	0.926981	0.98558	300.561	-0.0607389	0.30671	0.702342	0.945557
RMER1B	Other	3352.44	0.00430668	0.0323834	0.686003	0.99737	967.4	0.310453	0.337232	0.190366	0.614785	967.4	0.0117221	0.26687	0.949238	0.990332
L1_Mus1	L1	14194.5	-0.00940788	0.0323653	0.682518	0.99737	7071.02	0.0632669	0.394496			7071.02	0.0158917	0.334089
Lx3A	L1	1556.18	0.000303923	0.03282	0.952656	0.99737	910.479	0.0389589	0.345923	0.85678	0.970211	910.479	-0.0993406	0.318653	0.537911	0.892899
MLT1B	ERVL-MaLR	3418.12	-0.00147046	0.0316666	0.915615	0.99737	587.327	0.186559	0.315675	0.403664	0.807252	587.327	-0.0610487	0.274039	0.728849	0.950911
MTB	ERVL-MaLR	4312.6	-0.00395863	0.031132	0.775518	0.99737	853.204	0.196548	0.399761			853.204	0.0926483	0.326652
MLT1C	ERVL-MaLR	2920.65	0.0146753	0.0356893	0.282608	0.99737	503.919	0.051133	0.287362	0.815855	0.961145	503.919	-0.232998	0.304983	0.231772	0.676348
L1_Mm	L1	22705.3	0.000668213	0.0344695	0.732219	0.99737	2343.6	0.0475976	0.398498			2343.6	0.0302697	0.338997
IAPEY2_LTR	ERVK	200.046	0.00211466	0.033666	0.782472	0.99737	50.4661	0.209587	0.347653	0.35446	0.775433	50.4661	-0.0791815	0.294771	0.642191	0.92808
IAPEy-int	ERVK	204.968	0.567747	0.187523	8.48936e-05	0.00934678	62.236	0.467139	0.585272	0.0757122	0.388367	62.236	0.0299334	0.319001	0.836939	0.971596
ERVB4_1B-I_MM-int	ERVK	548.125	0.156146	0.34643	0.00726254	0.347655	154.883	-0.0511944	0.304731	0.806919	0.958502	154.883	-0.153825	0.29806	0.398917	0.820392
RMER16A3	ERVK	185.769	0.0118619	0.0367552	0.100646	0.99737	25.5921	0.468069	0.416295	0.0785044	0.395531	25.5921	-0.025734	0.284642	0.879027	0.976683
IAPEY3_LTR	ERVK	144.283	-0.00398719	0.0340053	0.591461	0.99737	34.7415	0.139258	0.363125	0.511003	0.861824	34.7415	-0.0143728	0.30644	0.924762	0.985875
L1Md_Gf	L1	1410.85	-0.00732435	0.0337396	0.457873	0.99737	3353.23	0.0403556	0.407031			3353.23	0.0387549	0.345902
MMETn-int	ERVK	76544.8	-0.382569	0.307303	0.00344387	0.21065	12371.6	-0.126302	0.415565	0.41702	0.816329	12371.6	-0.0819324	0.347808	0.474516	0.862887
ERVB4_1C-LTR_Mm	ERVK	3089.96	-0.00559285	0.0350544	0.069822	0.873991	33.4157	-0.0613389	0.329129	0.769249	0.950682	33.4157	-0.366221	0.439373	0.087905	0.431296
ETnERV-int	ERVK	19247.2	-0.0104579	0.0366547	0.0142904	0.487254	1098.52	-0.38777	0.425544	0.122002	0.500351	1098.52	-0.253433	0.361843	0.186284	0.618278
MLT1D	ERVL-MaLR	3109.46	0.0101695	0.0343689	0.383593	0.99737	488.186	0.119948	0.301192	0.582158	0.890914	488.186	-0.225381	0.311602	0.243608	0.690979
L4_C_Mam	RTE-X	246.878	0.00384135	0.0338078	0.635836	0.99737	35.5003	-0.00317539	0.347083	0.984805	0.996381	35.5003	-0.173555	0.349767	0.297391	0.746099
MER45C	hAT-Tip100	24.9624	0.00175746	0.0344507	0.554595	0.99737	7.08947	0.184975	0.417976	0.334239	0.758383	7.08947	0.000405021	0.328081	0.998533	0.999349
L1VL4	L1	2393.07	0.0027996	0.0339389	0.708619	0.99737	928.764	0.115156	0.344257	0.594224	0.894979	928.764	-0.0934005	0.308463	0.575873	0.906249
L1_Mus4	L1	3608.2	-0.001251	0.0329373	0.941052	0.99737	2209.4	0.0924987	0.363674	0.647994	0.914474	2209.4	-0.0377039	0.313913	0.796427	0.9666
RLTR6B_Mm	ERV1	225.066	0.00289671	0.0341426	0.619296	0.99737	57.0734	0.180099	0.322794	0.421643	0.818389	57.0734	-0.165764	0.304713	0.366559	0.798847
L1MA4A	L1	942.692	0.00637822	0.0332364	0.593881	0.99737	264.135	-0.0112418	0.30406	0.956038	0.991132	264.135	-0.436089	0.418253	0.0598776	0.355586
L1MB3	L1	3236.73	-0.0132844	0.0349716	0.254605	0.99737	704.921	0.0612571	0.292119	0.776131	0.951746	704.921	-0.228339	0.308413	0.2391	0.68473
Lx8b	L1	6192.14	-0.00646266	0.032606	0.611359	0.99737	1905.4	0.0427724	0.303272	0.840722	0.967035	1905.4	-0.232879	0.324784	0.228615	0.675145
RMER17A2	ERVK	495.874	0.000654647	0.0339814	0.914285	0.99737	203.445	0.123799	0.319484	0.571719	0.886804	203.445	-0.181742	0.314619	0.323055	0.766605
LTR81B	Gypsy	15.6765	0.00140247	0.0344449	0.610295	0.99737	6.98674	0.203946	0.443782	0.248147	0.684064	6.98674	-0.0634968	0.342487	0.578269	0.906572
MusHAL1	L1	1252.23	-0.00745669	0.0342111	0.415244	0.99737	384.757	0.0487841	0.327393	0.817735	0.961692	384.757	-0.102091	0.304141	0.549454	0.896982
ORR1B1	ERVL-MaLR	9085.49	-0.00869845	0.0321465	0.899254	0.99737	1765.21	0.0905442	0.283497	0.668888	0.922876	1765.21	-0.165326	0.278392	0.374854	0.804506
Lx6	L1	5462.85	-0.00394956	0.032462	0.708141	0.99737	1567.07	0.103059	0.319573	0.629754	0.908479	1567.07	-0.19175	0.320908	0.300584	0.748281
RLTR13A1	ERVK	115.772	0.0115759	0.0367042	0.0892734	0.951541	13.2467	0.0603468	0.366408	0.757543	0.94819	13.2467	0.0143176	0.317934	0.922292	0.985875
RLTR20B3	ERVK	269.457	-0.00464951	0.0338307	0.583326	0.99737	69.7183	0.164152	0.319123	0.459567	0.839348	69.7183	-0.169406	0.304909	0.355495	0.793936
MIRb	MIR	23383.6	0.00368482	0.0301885	0.803173	0.99737	3190.26	0.056864	0.290001	0.78059	0.953402	3190.26	-0.182294	0.291601	0.332776	0.776974
RMER12C	ERVK	1109.36	-0.00394782	0.0322253	0.743899	0.99737	287.851	0.118155	0.293956	0.58547	0.892036	287.851	-0.20146	0.296588	0.289639	0.738574
L1MC4	L1	4665.36	-0.0152192	0.0366117	0.195583	0.99737	816.736	0.037055	0.293225	0.867358	0.972083	816.736	-0.226977	0.31064	0.240497	0.686565
HAL1ME	L1	304.99	-0.0115955	0.0361991	0.176187	0.99737	63.0211	-0.251241	0.321456	0.267091	0.703736	63.0211	-0.937917	0.441272	0.00258869	0.0476356
MER58B	hAT-Charlie	2026.02	-0.00590814	0.0321731	0.638437	0.99737	327.949	-0.00839493	0.2982	0.966301	0.992797	327.949	-0.357882	0.371621	0.0973063	0.455341
RLTR9A3	ERVK	213.294	-0.00245614	0.0336323	0.758348	0.99737	34.5956	0.174771	0.362695	0.420728	0.817945	34.5956	-0.0833561	0.310473	0.605231	0.916133
RMER16-int	ERVK	5890.03	-0.349418	0.250542	0.00302607	0.195982	664.108	-0.021217	0.315124	0.915166	0.983325	664.108	-0.0770893	0.289906	0.656117	0.932845
MMERVK9E_I-int	ERVK	3032.31	0.528509	0.106017	2.7312e-08	5.01175e-06	308.239	0.0410709	0.268707	0.846463	0.96777	308.239	-0.0443734	0.249563	0.800932	0.967442
RLTR6-int	ERV1	1450.17	0.0187594	0.0403088	0.0826372	0.927349	217.054	0.307103	0.365776	0.201748	0.631597	217.054	0.0437532	0.282557	0.7991	0.967442
ORR1G	ERVL-MaLR	1877.72	-0.000840299	0.0325854	0.900136	0.99737	279.106	0.152293	0.33853	0.490072	0.85297	279.106	-0.195277	0.333039	0.285205	0.733608
RMER1A	Other	2888.84	-0.00258901	0.0337043	0.738757	0.99737	563.824	0.342248	0.342305	0.15626	0.561287	563.824	-0.0479213	0.267923	0.78512	0.965466
L2b	L2	6944.54	-0.00495295	0.0316193	0.697537	0.99737	934.55	0.102814	0.288812	0.636797	0.911047	934.55	-0.222162	0.298748	0.249751	0.698574
L1M3	L1	2521.68	0.000254067	0.0324483	0.983095	0.99737	583.269	-0.0397612	0.2974	0.850762	0.9682	583.269	-0.296481	0.341754	0.147672	0.553861
URR1A	hAT-Charlie	11959.5	-0.00750705	0.0310751	0.461188	0.99737	1780.1	0.0360069	0.285368	0.868173	0.972097	1780.1	-0.198983	0.292691	0.295135	0.743506
ERVB7_4-LTR_MM	ERVK	75.6913	0.00330017	0.0343552	0.517618	0.99737	20.5381	0.000116834	0.319268	0.9987	0.999567	20.5381	-0.137427	0.309498	0.436416	0.840969
L2	L2	9773.37	-0.0114695	0.0352652	0.283066	0.99737	1651.39	0.0375296	0.295984	0.867041	0.972083	1651.39	-0.246208	0.320878	0.209548	0.653671
L1MC2	L1	849.779	0.000692363	0.0327362	0.95016	0.99737	215.837	0.0268547	0.306399	0.905399	0.980756	215.837	-0.26773	0.344605	0.177959	0.606266
RLTR13G	ERVK	4404.28	-0.00575293	0.0350972	0.053127	0.777469	281.31	-0.339879	0.346616	0.15486	0.559053	281.31	-0.390387	0.36989	0.0773476	0.403613
Lx4A	L1	2788.94	-0.00421878	0.0322225	0.729962	0.99737	942.233	0.163249	0.322603	0.461732	0.840339	942.233	-0.106393	0.289158	0.548614	0.896982
L1MC1	L1	2552.87	-0.0108786	0.0344669	0.356481	0.99737	692.326	0.0960379	0.302819	0.665019	0.921036	692.326	-0.209755	0.310827	0.270867	0.721378
MTE2a	ERVL-MaLR	7398.1	0.00739303	0.0310183	0.630478	0.99737	1228.64	0.101391	0.289075	0.629845	0.908479	1228.64	-0.173054	0.285149	0.354695	0.793024
MLT2B4	ERVL	446.795	0.00875272	0.0348352	0.32458	0.99737	104.566	0.0826342	0.303104	0.70274	0.93315	104.566	-0.239067	0.324782	0.219054	0.664773
L1MD	L1	1981.64	-0.00538473	0.0338084	0.556274	0.99737	508.556	0.0382245	0.281644	0.859696	0.970849	508.556	-0.243556	0.302157	0.21464	0.659719
Lx3C	L1	1306.12	0.00501903	0.0329842	0.709876	0.99737	470.641	0.236028	0.363721	0.30543	0.735666	470.641	-0.0130415	0.290587	0.936139	0.987748
L4_B_Mam	RTE-X	129.401	-0.0067218	0.0348866	0.280638	0.99737	22.9922	0.103947	0.341807	0.627327	0.907372	22.9922	-0.551004	0.607897	0.0346806	0.258704
MER5A	hAT-Charlie	4174.52	0.000311142	0.0310103	0.982476	0.99737	571.983	0.0394069	0.282371	0.852409	0.968977	571.983	-0.247712	0.304346	0.207891	0.65137
MER3	hAT-Charlie	2049.38	0.000476701	0.0313985	0.981226	0.99737	335.15	0.0259807	0.295719	0.903486	0.980304	335.15	-0.182897	0.299374	0.329235	0.773344
IMPB_01	Satellite	3348.41	-0.0102623	0.0357	0.208622	0.99737	4227.1	0.00211961	0.345133	0.987837	0.99676	4227.1	-0.0598813	0.310437	0.717075	0.948261
MER2	TcMar-Tigger	5948.8	-0.00812617	0.0319856	0.547917	0.99737	1301.15	-0.0316603	0.291219	0.879852	0.97439	1301.15	-0.264663	0.32121	0.185996	0.617954
L1M4a1	L1	238.99	0.00670788	0.0344206	0.384444	0.99737	45.2816	0.0676748	0.317402	0.752715	0.94787	45.2816	-0.106076	0.29666	0.542444	0.895003
L1MA4	L1	2294.17	-0.00156836	0.0325516	0.854717	0.99737	681.086	-0.00927556	0.298667	0.961003	0.992166	681.086	-0.335728	0.362423	0.112908	0.487764
RLTR51A_Mm	ERVK?	478.383	-0.00877249	0.0352392	0.25068	0.99737	143.222	0.116496	0.328112	0.591722	0.894198	143.222	-0.077726	0.293857	0.649309	0.930235
PB1D7	Alu	22604.5	-0.0119504	0.0335886	0.388705	0.99737	2684.29	0.051985	0.270523	0.811692	0.959962	2684.29	-0.2253	0.282778	0.241813	0.68895
UCON12	Unknown	7.07658	0.00354433	0.0347364	0.0605481	0.823005	9.75441	0.0379041	0.396143	0.803881	0.958133	9.75441	0.0521267	0.341136	0.644288	0.929024
L1MEd	L1	1246.4	0.00901747	0.0350973	0.170836	0.99737	754.295	0.0921511	0.411358			754.295	0.0186415	0.340219
MIR3	MIR	8810.85	-0.000555279	0.0311761	0.96731	0.99737	994.766	0.138869	0.293268	0.527049	0.867463	994.766	-0.140359	0.276895	0.443247	0.84445
L1_Mus2	L1	6631.82	-0.0254052	0.0446681	0.888561	0.99737	3655.85	0.0788575	0.397443			3655.85	0.021726	0.334284
MMERVK9C_I-int	ERVK	6328.34	0.0111557	0.0363271	0.135504	0.99737	286.269	-0.0331861	0.330622	0.870976	0.972437	286.269	-0.0883671	0.303766	0.596352	0.913251
Lx3B	L1	1835.6	0.00148233	0.0328131	0.893681	0.99737	2368.96	0.147706	0.371188	0.478277	0.847366	2368.96	0.0366633	0.31	0.813945	0.969554
MIR	MIR	21592.4	-0.00668307	0.0306407	0.613165	0.99737	3333.19	0.0376283	0.286339	0.849707	0.967956	3333.19	-0.2189	0.299589	0.256781	0.705713
RLTR20C1_MM	ERVK	908.804	-0.0382245	0.0673573	0.0170346	0.487254	325.905	0.134168	0.333866	0.540024	0.87363	325.905	-0.110742	0.302647	0.520314	0.888123
MIRc	MIR	12064.3	0.00374611	0.0309681	0.861392	0.99737	1554.39	0.0859971	0.283905	0.687356	0.928029	1554.39	-0.170246	0.280497	0.361866	0.796976
B1_Mur4	Alu	34152.5	-0.0129776	0.0336061	0.274496	0.99737	6111.09	0.175269	0.351807	0.423936	0.820045	6111.09	-0.0802025	0.301409	0.630725	0.924114
MER5B	hAT-Charlie	3045.63	-0.00762513	0.0333279	0.519509	0.99737	337.504	0.0206898	0.268737	0.923252	0.984525	337.504	-0.211094	0.27857	0.268465	0.718919
L1MA6	L1	2273.67	-0.0179179	0.0380165	0.169019	0.99737	636.939	0.0428137	0.29901	0.841108	0.967035	636.939	-0.216794	0.313631	0.258222	0.706359
Charlie1	hAT-Charlie	1193.85	-0.00380911	0.0333891	0.608392	0.99737	257.865	-0.0696973	0.289167	0.741465	0.945476	257.865	-0.351285	0.346821	0.100757	0.461636
MLT1A0	ERVL-MaLR	3865.92	0.00125091	0.0319115	0.931091	0.99737	660.612	0.00181547	0.28743	0.997706	0.999312	660.612	-0.237031	0.307626	0.225673	0.671511
B1_Mus2	Alu	62432.9	-0.0230469	0.0400854	0.13979	0.99737	41441.2	0.184933	0.449547			41441.2	0.0512431	0.343408
Tigger18a	TcMar-Tigger	165.293	-0.00630194	0.0344087	0.421003	0.99737	24.7567	0.224344	0.360911	0.322472	0.750361	24.7567	-0.227662	0.355416	0.219156	0.664773
L1MC5a	L1	1503.59	-0.00735241	0.0339914	0.46013	0.99737	333.943	0.141662	0.312159	0.520073	0.864467	333.943	-0.0907044	0.281521	0.609883	0.91823
L1Md_F3	L1	6455.93	-0.0127645	0.0351516	0.362896	0.99737	4482.81	0.0789412	0.407649			4482.81	0.0349018	0.341593
L1M4b	L1	850.674	0.00238741	0.0325569	0.871739	0.99737	187.822	0.0298753	0.293843	0.890068	0.976154	187.822	-0.172708	0.294549	0.353462	0.792265
L1MA5	L1	1500.82	-0.00655291	0.0333095	0.555496	0.99737	700.285	-0.105066	0.30207	0.622134	0.904589	700.285	-0.172538	0.295662	0.353295	0.792023
L1ME3D	L1	125.269	-0.00108686	0.0341075	0.811313	0.99737	26.1351	-0.0424272	0.290693	0.840583	0.967015	26.1351	-0.232443	0.31288	0.228846	0.675145
MER131	SINE?	143.569	-0.00249102	0.0339734	0.706483	0.99737	13.3544	-0.0130503	0.368157	0.942148	0.988712	13.3544	-0.0881519	0.333595	0.53405	0.891486
ID4	ID	14957.6	-0.0119665	0.0333413	0.402194	0.99737	2204.36	0.057587	0.26649	0.775999	0.9517	2204.36	-0.239979	0.281798	0.215661	0.66117
MER5A1	hAT-Charlie	1404.78	-0.0133188	0.03511	0.296515	0.99737	206.554	-0.00789841	0.27366	0.971174	0.993914	206.554	-0.396335	0.338505	0.070572	0.386515
RLTR17B_Mm	ERVK	3871.35	-0.0024372	0.0323652	0.752477	0.99737	2026.94	0.0665217	0.330815	0.739934	0.94482	2026.94	-0.180994	0.332461	0.316018	0.761365
RLTR13D4	ERVK	125.819	-0.0111057	0.0364304	0.111935	0.99737	13.4547	0.119275	0.351915	0.571717	0.886804	13.4547	-0.033723	0.305027	0.828976	0.971197
HAL1M8	L1	451.775	-0.00433127	0.0342321	0.536479	0.99737	80.1371	-0.0656629	0.293454	0.755265	0.948108	80.1371	-0.139998	0.283691	0.4432	0.84445
URR1B	hAT-Charlie	11264.3	-0.0120095	0.0329681	0.452184	0.99737	1668.55	0.0541539	0.28489	0.78954	0.955547	1668.55	-0.237967	0.303136	0.223572	0.668962
L2c	L2	6315.36	-0.0045011	0.0317129	0.618387	0.99737	984.122	0.0637597	0.292624	0.764375	0.949549	984.122	-0.189465	0.296339	0.314357	0.760067
RLTR45	ERVK	517.41	0.00917149	0.0349924	0.309377	0.99737	135.553	0.200806	0.342294	0.375441	0.790725	135.553	0.0336184	0.285366	0.846852	0.973514
ORR1D2	ERVL-MaLR	7567.46	-0.000397847	0.030194	0.979033	0.99737	1074.97	0.0341485	0.273859	0.871971	0.972553	1074.97	-0.20291	0.281436	0.286324	0.734526
L1MC4a	L1	1923.78	-0.00230882	0.0324459	0.823671	0.99737	455.893	0.0420501	0.306883	0.846989	0.96777	455.893	-0.22189	0.324643	0.245926	0.693668
Lx3_Mus	L1	2464.37	0.00409489	0.0330793	0.701525	0.99737	1013.63	0.141355	0.348932	0.51882	0.864108	1013.63	-0.0702142	0.303182	0.681718	0.939389
MLT1J	ERVL-MaLR	1366.19	-0.0022031	0.0316974	0.852735	0.99737	171.688	0.210467	0.310052	0.349297	0.77089	171.688	-0.0354981	0.265629	0.839316	0.972291
L1MD1	L1	942.822	-0.00812159	0.0342475	0.418673	0.99737	194.184	0.0671556	0.332349	0.755606	0.948108	194.184	-0.171791	0.330019	0.333961	0.777761
UCON6	Unknown	31.6627	0.00476739	0.0348002	0.200366	0.99737	5.10507	0.0469932	0.385763	0.781199	0.953402	5.10507	-0.105854	0.353055	0.380132	0.806893
MLT1F	ERVL-MaLR	719.179	0.0019717	0.0328826	0.847845	0.99737	109.973	0.096039	0.278306	0.651177	0.915259	109.973	-0.503399	0.368773	0.0338077	0.254895
Zaphod	hAT-Tip100	114.487	-0.00325231	0.0342609	0.561577	0.99737	17.2198	0.516609	0.588027	0.0626069	0.349016	17.2198	-0.0264676	0.316505	0.853871	0.974031
RLTR10C	ERVK	893.014	0.00418802	0.0332066	0.676252	0.99737	223.399	0.222368	0.312069	0.32483	0.751373	223.399	-0.110399	0.275119	0.540974	0.894339
MER77B	ERVL	403.947	-0.00853755	0.0347818	0.334296	0.99737	59.5295	0.0260574	0.321224	0.904158	0.980482	59.5295	-0.0889944	0.297528	0.603662	0.915401
MER89	ERV1	368.911	0.0018151	0.0338801	0.786728	0.99737	845.433	4.34969	0.907797	9.35426e-08	7.01849e-06	845.433	2.86037	0.96008	0.000121187	0.00442104
PB1	Alu	10130.9	-0.0101161	0.0322711	0.539286	0.99737	1482.17	0.218838	0.277662	0.314213	0.743128	1482.17	-0.104768	0.249652	0.558179	0.899392
RLTR28B	ERVL	259.366	-0.00852122	0.0354138	0.188301	0.99737	21.9405	0.163464	0.379957	0.434978	0.826237	21.9405	-0.104278	0.330087	0.487242	0.870716
X3_LINE	RTE-BovB	48.5114	0.00134512	0.0342752	0.738992	0.99737	12.9239	0.0369135	0.374697	0.84086	0.967035	12.9239	0.0573183	0.328524	0.676162	0.938438
Lx2A1	L1	277.439	-0.00199166	0.0333031	0.823966	0.99737	134.325	0.160262	0.39125	0.427964	0.822047	134.325	0.046463	0.320396	0.752713	0.958566
L3	CR1	4777.55	-0.0136606	0.0333377	0.304531	0.99737	737.913	0.216756	0.291236	0.329765	0.755143	737.913	-0.0938126	0.258317	0.600591	0.914536
MamGypLTR1c	Gypsy	41.7309	-0.00141681	0.0343094	0.727452	0.99737	3.20667	-0.0582522	0.400322	0.694118	0.929918	3.20667	-0.022878	0.338297	0.829286	0.971197
MTE2b	ERVL-MaLR	5655.31	0.00170479	0.0316834	0.899002	0.99737	931.605	0.148154	0.293643	0.502681	0.858422	931.605	-0.142528	0.276495	0.435985	0.840686
Charlie9	hAT-Charlie	139.558	0.000210083	0.0338885	0.968627	0.99737	24.9175	-0.252346	0.384293	0.268328	0.704604	24.9175	-0.5038	0.553423	0.0422588	0.293106
MTA_Mm	ERVL-MaLR	14515.3	0.00678964	0.0329076	0.968752	0.99737	3700.43	0.0973776	0.403218			3700.43	0.0619804	0.340915
MLTR31FA_MM	ERVK	293.779	-0.00542946	0.0345994	0.363341	0.99737	53.1977	0.110717	0.311105	0.61046	0.900779	53.1977	-0.252075	0.336884	0.198587	0.638713
MTC-int	ERVL-MaLR	2350.27	-0.0116751	0.0345834	0.337514	0.99737	378.694	0.0839306	0.280757	0.693941	0.929918	378.694	-0.193414	0.28392	0.306824	0.752912
MTD-int	ERVL-MaLR	2063.67	-0.0135793	0.0358296	0.257824	0.99737	408.482	0.0734933	0.313174	0.735214	0.943138	408.482	-0.114263	0.293859	0.517139	0.88522
MURVY-int	ERV1	55.9444	-0.00426179	0.0345627	0.37179	0.99737	47.2291	0.508307	0.702734	0.0514523	0.308458	47.2291	0.0830558	0.337509	0.53706	0.892621
MTE2b-int	ERVL-MaLR	240.333	0.00095346	0.0336371	0.904384	0.99737	52.7337	0.152566	0.324359	0.488973	0.852312	52.7337	-0.21154	0.328402	0.257607	0.705795
RLTR27	ERVK	170.072	0.00565994	0.0344628	0.411309	0.99737	38.4028	0.550191	0.442327	0.05	0.304441	38.4028	-0.0927505	0.293173	0.594725	0.912324
MT2B1	ERVL	4533.88	0.0250712	0.0408049	0.151196	0.99737	1154.03	0.568465	0.305414	0.0191535	0.169366	1154.03	-0.00873042	0.23395	0.962975	0.992936
BGLII	ERVK	1009.79	-0.012142	0.0371466	0.0518138	0.777469	288.726	-0.140637	0.260149	0.495965	0.855232	288.726	-0.178247	0.254174	0.334536	0.778086
B1_Mur2	Alu	30020.1	-0.0166793	0.0356461	0.268275	0.99737	4622.57	0.083526	0.279495	0.686197	0.927637	4622.57	-0.237764	0.293686	0.234063	0.680033
Lx5c	L1	4676.11	-0.0180743	0.0377436	0.195396	0.99737	1439.92	0.124762	0.314437	0.568111	0.885411	1439.92	-0.179408	0.308366	0.332082	0.776301
L1MD3	L1	1116.45	-0.0220573	0.0405563	0.131302	0.99737	220.114	-0.0296367	0.28311	0.886986	0.975449	220.114	-0.261584	0.310179	0.188112	0.620963
RMER17B	ERVK	1223.46	-0.00495964	0.0342021	0.559392	0.99737	260.507	0.107395	0.343719	0.613851	0.901376	260.507	-0.0865768	0.307778	0.601952	0.914857
RLTR13B4	ERVK	160.461	0.00472505	0.0341357	0.527188	0.99737	46.8617	0.448868	0.508044	0.0910264	0.428054	46.8617	0.088258	0.31671	0.580198	0.906863
B1_Mur1	Alu	35518.7	-0.0153557	0.0349572	0.288509	0.99737	5023	0.077576	0.271667	0.711903	0.93672	5023	-0.214304	0.279578	0.267279	0.717411
ORR1A3	ERVL-MaLR	2441.71	0.0155194	0.0356837	0.270574	0.99737	462.317	0.173025	0.315034	0.43795	0.827971	462.317	-0.0871369	0.279077	0.61189	0.919191
B4	B4	33677.5	-0.00859839	0.0314071	0.561172	0.99737	5852.99	0.0727797	0.292306	0.734058	0.943059	5852.99	-0.176143	0.291036	0.346794	0.785428
MER44C	TcMar-Tigger	124.154	-0.00596796	0.0346259	0.36903	0.99737	25.0103	-0.0571836	0.3338	0.783148	0.953696	25.0103	-0.169444	0.331435	0.33498	0.778291
MTA_Mm-int	ERVL-MaLR	10575.1	-0.00146837	0.0339805	0.810041	0.99737	2477.59	0.106818	0.395357			2477.59	0.0530289	0.333026
Lx5	L1	4839.56	-0.00569272	0.0320415	0.617742	0.99737	1658.15	0.0862063	0.310297	0.680659	0.926073	1658.15	-0.167397	0.305306	0.361131	0.796831
L1ME4a	L1	788.471	0.00285033	0.0336809	0.732134	0.99737	180.966	-0.08846	0.263531	0.669333	0.923179	180.966	-0.26222	0.281289	0.180737	0.610176
L1MB8	L1	4399.5	-0.000949041	0.0320032	0.931599	0.99737	885.549	0.0360106	0.299881	0.863525	0.971695	885.549	-0.145117	0.292232	0.423328	0.835129
RMER13A2	ERVK	909.458	0.00898666	0.0343015	0.391953	0.99737	146.203	0.327841	0.274914	0.13686	0.527332	146.203	-0.0368775	0.233158	0.833215	0.971197
ORR1D1	ERVL-MaLR	11187.3	-0.00823125	0.0314943	0.575454	0.99737	1611.4	0.113567	0.299722	0.605695	0.898976	1611.4	-0.116431	0.279687	0.516312	0.885003
RLTR20C2_MM	ERVK	795.789	0.000145204	0.0331643	0.988638	0.99737	208.287	0.0269744	0.3027	0.897766	0.979141	208.287	-0.267577	0.339912	0.178528	0.607186
ORR1A2	ERVL-MaLR	9347.2	0.0111342	0.0342222	0.348494	0.99737	2379.91	0.426982	0.424216	0.103137	0.455797	2379.91	0.111139	0.299811	0.531233	0.890408
MER33	hAT-Charlie	1876.78	-0.0197247	0.0398404	0.114665	0.99737	234.029	-0.0614762	0.305733	0.771808	0.951061	234.029	-0.273372	0.342661	0.17178	0.595706
RLTR16	ERVK	499.335	-0.00620912	0.0344428	0.416161	0.99737	142.263	-0.15384	0.321944	0.481063	0.848512	142.263	-0.254415	0.33887	0.193675	0.631913
UCON28a	Unknown	9.24505	0.000607207	0.0344607	0.732469	0.99737	9.13701	0.143724	0.421892	0.375292	0.79061	9.13701	0.0154124	0.337163	0.889832	0.978036
YREP_Mm	Unknown	291.378	-0.00655846	0.034427	0.410445	0.99737	57.3097	0.251382	0.354507	0.27946	0.714849	57.3097	0.0781778	0.290013	0.655097	0.932682
RMER20B	ERVK	508.221	0.0133312	0.036082	0.229875	0.99737	106.65	0.22756	0.347059	0.320853	0.749241	106.65	-0.030964	0.284667	0.855709	0.974489
Tigger16a	TcMar-Tigger	141.468	-0.00567427	0.0344999	0.4014	0.99737	36.6395	-0.197667	0.336045	0.376627	0.790935	36.6395	-0.314265	0.373284	0.1305	0.519472
ORR1B1-int	ERVL-MaLR	3762.57	0.00690873	0.0337624	0.684425	0.99737	686.593	0.306811	0.321379	0.189225	0.613729	686.593	-0.0319251	0.260257	0.857854	0.9749
L1MC3	L1	2282.26	0.00391129	0.0330676	0.708322	0.99737	500.232	0.0893529	0.286858	0.680017	0.925986	500.232	-0.221195	0.297734	0.252137	0.70168
L1MD2	L1	1509.47	-0.0029885	0.0331263	0.760357	0.99737	372.674	-0.0469842	0.306534	0.822771	0.96355	372.674	-0.288103	0.351925	0.153948	0.56589
RLTR15	ERVK	1402.41	-0.00224448	0.0325726	0.835912	0.99737	262.99	0.0187746	0.290944	0.931312	0.986033	262.99	-0.27135	0.324883	0.175507	0.601396
RLTR1D2_MM	ERV1	322.171	0.00261752	0.0339749	0.676179	0.99737	21.3306	-0.0374596	0.324366	0.856667	0.970211	21.3306	-0.0459914	0.292125	0.782558	0.964864
UCON26	Unknown	24.2473	-0.0031365	0.0345945	0.290678	0.99737	2.93146	-0.0186966	0.393942	0.901801	0.980025	2.93146	-0.0818084	0.350987	0.44485	0.845113
RMER6C	ERVK	1334.82	0.0109587	0.0343386	0.422698	0.99737	362.899	0.315737	0.332308	0.182115	0.602337	362.899	0.0296127	0.264436	0.863956	0.975827
RLTR19B	ERVK	154.182	0.000434082	0.0338399	0.950491	0.99737	35.8778	1.0364	0.390027	0.000886082	0.0182181	35.8778	0.28259	0.317107	0.162631	0.580408
MER34A1	ERV1	131.62	-0.00212297	0.0340456	0.727431	0.99737	14.4153	0.0181718	0.352198	0.929293	0.986033	14.4153	-0.172834	0.355461	0.284822	0.733261
RLTR13D5	ERVK	193.407	0.0054657	0.0341639	0.491742	0.99737	65.3032	1.60179	0.609433	0.000553306	0.0126757	65.3032	0.222463	0.363416	0.225265	0.671389
L1MCa	L1	1011.35	0.0030707	0.0335009	0.725995	0.99737	317.479	0.0176106	0.304421	0.937506	0.987187	317.479	-0.227027	0.325031	0.237975	0.68345
RMER20A	ERVK	702.585	-0.00595272	0.0340588	0.490026	0.99737	82.1333	0.136225	0.326335	0.535277	0.870591	82.1333	-0.147535	0.308073	0.407639	0.825734
RLTR14_RN	ERV1	597.922	-0.00365541	0.0327789	0.736427	0.99737	76.6985	0.133605	0.29375	0.539961	0.87363	76.6985	-0.208244	0.297695	0.276972	0.726253
RMER13A	ERVK	474.997	-0.000115337	0.0331287	0.988953	0.99737	57.8233	0.352807	0.454562	0.149475	0.549865	57.8233	-0.0398344	0.309862	0.794989	0.966355
RLTR51B_Mm	ERVK?	143.719	0.00162077	0.0338895	0.806813	0.99737	49.0256	-0.0142003	0.327277	0.943614	0.989218	49.0256	-0.281497	0.385626	0.14693	0.552858
RodERV21-int	ERV1	641.922	0.00183888	0.0328128	0.857656	0.99737	151.985	1.04082	0.418077	0.00142357	0.0267274	151.985	0.328871	0.342145	0.122261	0.505031
RLTR14-int	ERV1	1316.83	0.183219	0.104557	0.00252258	0.185158	160.904	0.79753	0.475245	0.0131307	0.131266	160.904	0.0849091	0.287447	0.629476	0.923414
MLT-int	ERVL-MaLR	286.992	-0.00117153	0.0336074	0.874992	0.99737	83.3038	-0.0497549	0.295602	0.813687	0.960471	83.3038	-0.343466	0.359384	0.106738	0.474945
MTE-int	ERVL-MaLR	2576.65	-0.00086063	0.0318093	0.957208	0.99737	449.178	0.0967416	0.298168	0.655349	0.917288	449.178	-0.238528	0.31592	0.221274	0.66695
RLTR41	ERV1	703.545	-0.00131167	0.0329876	0.888582	0.99737	112.61	-0.201513	0.279438	0.346726	0.769062	112.61	-0.25396	0.283443	0.19305	0.63089
RMER10B	ERVL	1430.72	-0.00383488	0.0337442	0.641166	0.99737	268.967	0.0920053	0.294866	0.669744	0.923219	268.967	-0.125111	0.279702	0.490905	0.872185
MLTR11B	ERVK	1449.64	0.0312276	0.051788	0.0392612	0.649754	246.599	0.295161	0.318511	0.204132	0.635663	246.599	-0.00338384	0.259321	0.97964	0.997873
RMER4A	ERVK	2104.49	-0.00913629	0.0338522	0.438907	0.99737	285.523	0.0753601	0.280128	0.724135	0.940962	285.523	-0.117981	0.266846	0.516627	0.88522
RLTR25B	ERVK	1140.92	-0.00562218	0.0323964	0.566002	0.99737	260.805	0.0685188	0.322925	0.753835	0.948028	260.805	-0.177242	0.322895	0.327034	0.771047
RMER20C_Mm	ERVK	509.57	0.00216525	0.0334876	0.799592	0.99737	85.7547	0.429384	0.428719	0.101125	0.45197	85.7547	0.0367717	0.290141	0.829815	0.971197
RLTR28	ERVL	1249.91	-0.00528402	0.0343196	0.106785	0.99737	148	0.192782	0.335486	0.392353	0.800227	148	-0.110513	0.295399	0.529053	0.889912
LTR85c	Gypsy?	18.1112	-0.000262091	0.0343888	0.927928	0.99737	5.88837	-0.0769429	0.393548	0.644687	0.913704	5.88837	-0.10402	0.351205	0.406513	0.825566
MamRep605	LTR?	314.592	-0.00473323	0.0339946	0.549835	0.99737	50.8437	0.319062	0.370543	0.188463	0.612115	50.8437	0.0412085	0.283935	0.812292	0.969359
ORR1C2	ERVL-MaLR	6029.78	0.00283334	0.0308041	0.588956	0.99737	900.618	0.151526	0.297234	0.493523	0.853948	900.618	-0.136966	0.277933	0.452288	0.851059
ERV3-16A3_I-int	ERVL	125.419	0.00608993	0.0346821	0.342735	0.99737	35.2287	0.337284	0.411324	0.168529	0.581166	35.2287	-0.210831	0.353809	0.238071	0.683605
L1MB4	L1	1441.63	-0.00574871	0.0334059	0.576162	0.99737	346.21	0.0364295	0.30246	0.867508	0.972083	346.21	-0.158992	0.298569	0.386077	0.810669
LTR72_RN	ERV1	285.528	-0.00141695	0.0331926	0.877267	0.99737	49.7256	0.256215	0.34436	0.271065	0.707281	49.7256	-0.185658	0.314622	0.316552	0.761609
Charlie5	hAT-Charlie	680.56	0.0027419	0.0325927	0.779746	0.99737	131.962	-0.00662466	0.291113	0.973828	0.994501	131.962	-0.14633	0.285162	0.425453	0.835999
MER2B	TcMar-Tigger	675.862	-0.00710037	0.0338757	0.480867	0.99737	90.9754	-0.0229672	0.308156	0.911816	0.982382	90.9754	-0.353302	0.389241	0.100095	0.460356
MYSERV16_I-int	ERVK	1212.41	0.00359082	0.0335574	0.679351	0.99737	473.754	0.0478431	0.307489	0.823833	0.963876	473.754	-0.156938	0.302111	0.390241	0.813024
RLTR20B2	ERVK	325.364	-0.00656588	0.0347287	0.32896	0.99737	66.6579	0.0644729	0.337053	0.760923	0.949206	66.6579	-0.188556	0.343138	0.284159	0.732152
LTR16B2	ERVL	109.606	0.00349355	0.0342838	0.542792	0.99737	9.17572	0.139215	0.392297	0.465178	0.841017	9.17572	-0.0367293	0.325886	0.782358	0.964864
MLTR25A	ERVK	1883.56	-0.00657685	0.0339109	0.502147	0.99737	384.685	0.0221464	0.299254	0.921776	0.984305	384.685	-0.0925185	0.280206	0.601383	0.914752
Lx2B2	L1	3886.44	-0.00669991	0.0342026	0.481053	0.99737	896.849	0.105852	0.326771	0.624913	0.906082	896.849	-0.121521	0.303585	0.486639	0.870593
RLTR20A3_MM	ERVK	383.032	-0.00328172	0.0335841	0.70299	0.99737	94.7761	0.125087	0.316687	0.569829	0.88628	94.7761	-0.0776292	0.28484	0.655251	0.932682
X7B_LINE	CR1	140.269	-0.00785751	0.0353779	0.164449	0.99737	22.6337	0.198688	0.357113	0.372133	0.788202	22.6337	-0.116674	0.312857	0.485464	0.87006
RCHARR1	hAT-Charlie	3829.45	-0.00102654	0.0326153	0.960357	0.99737	740.859	0.0654254	0.301454	0.765386	0.949549	740.859	-0.168796	0.298697	0.361451	0.796831
MER92-int	ERV1	109.206	0.00672678	0.0351143	0.180656	0.99737	19.3361	-0.171748	0.335337	0.436388	0.826727	19.3361	-0.127852	0.300806	0.472243	0.86148
MER57-int	ERV1	74.5538	-0.00445601	0.0347189	0.250887	0.99737	12.5273	-0.218505	0.371597	0.324763	0.751373	12.5273	-0.232087	0.361623	0.209982	0.654349
RLTR9F	ERVK	87.9943	0.00163458	0.034144	0.756185	0.99737	13.1394	0.32788	0.459379	0.160778	0.56911	13.1394	0.201629	0.369749	0.231492	0.676348
L1MC5	L1	2396.67	-0.00294813	0.0332314	0.793461	0.99737	452.479	-0.0184461	0.286216	0.923227	0.984525	452.479	-0.351724	0.346174	0.100423	0.461402
RLTR17	ERVK	2448.6	-0.00268305	0.0339677	0.695774	0.99737	416.1	0.0253413	0.259358	0.903639	0.980304	416.1	-0.162341	0.257777	0.377366	0.805721
RLTR16B_MM	ERVK	571.431	-0.00497294	0.0342562	0.472297	0.99737	93.8117	-0.236728	0.335058	0.296232	0.728508	93.8117	-0.0504993	0.275589	0.770569	0.96274
Charlie13a	hAT-Charlie	83.4436	0.0108746	0.036515	0.0764928	0.879263	13.74	0.131949	0.375802	0.513822	0.862852	13.74	0.126694	0.337266	0.411899	0.828098
RMER5	ERV1	3860.43	0.000282095	0.0306399	0.850905	0.99737	748.214	0.180225	0.274773	0.401881	0.806055	748.214	-0.119576	0.253765	0.510181	0.882761
MT2A	ERVL	4054.59	0.0026371	0.0309511	0.853489	0.99737	781.312	0.235488	0.287773	0.289689	0.723025	781.312	-0.109283	0.25612	0.543841	0.895038
ERVL-B4-int	ERVL	540.448	0.0174016	0.0392578	0.0295191	0.57268	138.714	0.127408	0.356752	0.548731	0.877974	138.714	-0.0433723	0.306246	0.782279	0.964864
MERVL_2A-int	ERVL	4905.92	0.251462	0.087093	0.000164876	0.0165026	1025.56	0.273026	0.391918	0.244125	0.682227	1025.56	0.112999	0.311968	0.511127	0.882761
MurSatRep1	Unknown	25741.2	0.000647239	0.0339265	0.919971	0.99737	6692.74	0.0467722	0.336589	0.802009	0.958133	6692.74	-0.0245335	0.298393	0.884604	0.977559
RLTR9E	ERVK	3265.27	0.00244875	0.0344169	0.532838	0.99737	1061.68	0.238589	0.377867	0.298102	0.730381	1061.68	0.0503978	0.29939	0.756187	0.959779
Lx2B	L1	1185.6	-0.00257589	0.0328293	0.803012	0.99737	854.382	0.215966	0.372736	0.33946	0.762339	854.382	0.0125935	0.298249	0.931914	0.98745
RMER17C2	ERVK	472.635	-0.0131465	0.0372119	0.101903	0.99737	163.923	0.0167461	0.322108	0.940988	0.988455	163.923	-0.130894	0.308941	0.452183	0.851053
MT2C_Mm	ERVL	1600.49	0.00677227	0.0335472	0.531808	0.99737	1503.44	3.39523	0.678799			1503.44	2.24368	0.709503
ORR1B2	ERVL-MaLR	4176.57	0.00388238	0.0312664	0.781347	0.99737	634.712	0.107207	0.300556	0.613382	0.901073	634.712	-0.073947	0.273524	0.676097	0.938419
LTRIS2	ERV1	3971.32	-0.0182689	0.0413889	0.00952324	0.374467	606.303	-0.620933	0.365718	0.0198823	0.174126	606.303	-0.38762	0.337298	0.0746118	0.397154
MuRRS4-int	ERV1	851.301	-0.00389647	0.0329285	0.519962	0.99737	273.645	-0.00935826	0.322159	0.959492	0.991785	273.645	-0.152824	0.315822	0.388068	0.812257
RMER17C	ERVK	1738.07	-0.00809591	0.035387	0.175571	0.99737	591.885	0.0319651	0.309279	0.881981	0.974872	591.885	-0.149608	0.302305	0.409335	0.826794
IAPLTR2b	ERVK	365.591	0.0121439	0.036455	0.148493	0.99737	69.3115	0.290954	0.385855	0.219712	0.65384	69.3115	0.139602	0.313807	0.427908	0.837447
Tigger6a	TcMar-Tigger	256.894	-0.00537299	0.0341716	0.493354	0.99737	33.3375	0.00153327	0.319214	0.996558	0.998881	33.3375	-0.11999	0.303893	0.490347	0.871955
LTR48	ERV1	240.618	0.00693364	0.0344021	0.413832	0.99737	24.218	-0.168573	0.35745	0.433654	0.825132	24.218	-0.471925	0.541138	0.0452348	0.304636
L1ME3	L1	712.322	0.0086747	0.0341866	0.396927	0.99737	177.362	-0.0988116	0.298608	0.643211	0.913174	177.362	-0.325418	0.348189	0.121144	0.502972
LTR16C	ERVL	243.903	0.00851904	0.0353226	0.21718	0.99737	63.0909	0.286309	0.330831	0.220705	0.654466	63.0909	-0.213799	0.308731	0.263876	0.712933
Cheshire	hAT-Charlie	892.252	-0.000718355	0.0329265	0.928753	0.99737	186.832	-0.0685941	0.330413	0.743194	0.945555	186.832	-0.259164	0.369491	0.17658	0.603368
MLT1E2	ERVL-MaLR	1065.78	-0.0199352	0.0404275	0.102857	0.99737	144.34	0.213499	0.311794	0.342129	0.764889	144.34	-0.0432886	0.267039	0.804294	0.967746
B1_Mur3	Alu	23576.5	-0.0126031	0.0334616	0.35057	0.99737	3568.36	0.126747	0.304965	0.564731	0.883981	3568.36	-0.125939	0.284597	0.484597	0.869253
RLTR9D	ERVK	956.326	0.00998298	0.0358955	0.13287	0.99737	87.9994	0.143701	0.294461	0.510331	0.861824	87.9994	-0.0152838	0.261607	0.929976	0.986875
MLT2C2	ERVL	216.818	0.0172159	0.04018	0.0287006	0.57268	45.1238	-0.111003	0.347365	0.595038	0.894979	45.1238	-0.395665	0.486488	0.0689022	0.382718
L1M3b	L1	50.9816	0.00659963	0.0351948	0.117168	0.99737	6.29492	0.0502681	0.372715	0.78656	0.954186	6.29492	-0.196792	0.390576	0.18215	0.612558
LTR80B	ERVL	18.3252	-0.0011379	0.0343989	0.719894	0.99737	3.40215	0.0662496	0.396467	0.682336	0.926493	3.40215	-0.151964	0.383273	0.179332	0.609068
MLT1G3	ERVL-MaLR	505.947	0.0239836	0.0455592	0.033359	0.597248	74.8141	0.27267	0.325709	0.239507	0.676981	74.8141	-0.122827	0.280928	0.496567	0.873986
MER20	hAT-Charlie	4414.68	-0.0155569	0.0348932	0.338287	0.99737	713.579	-0.0434004	0.285035	0.836597	0.966544	713.579	-0.261445	0.31122	0.190803	0.626004
RLTR22_Mur	ERVK	1192.44	0.0198242	0.0388222	0.164027	0.99737	643.433	-0.0565833	0.343788	0.781293	0.953402	643.433	-0.130839	0.325027	0.427735	0.83741
RMER19B	ERVK	4649.14	0.0239144	0.0400021	0.134958	0.99737	1384.91	0.257493	0.270377	0.230324	0.66578	1384.91	-0.00763508	0.234306	0.964897	0.993177
ORR1C1	ERVL-MaLR	3869.46	-0.00169438	0.0311843	0.887779	0.99737	662.232	0.134095	0.273466	0.530952	0.869302	662.232	-0.11833	0.256815	0.512874	0.883694
RMER10A	ERVL	3243.11	-0.0202461	0.0421405	0.0223541	0.52216	1015.7	0.24721	0.386939	0.282104	0.716591	1015.7	-0.00156291	0.299469	0.988353	0.998623
RLTR42-int	ERVK	1180.18	0.0115013	0.0340142	0.371033	0.99737	219.168	0.241245	0.297217	0.280689	0.715801	219.168	-0.208308	0.284359	0.279739	0.728701
MYSERV6-int	ERVK	2804.58	0.0027172	0.03322	0.882831	0.99737	565.452	0.0643807	0.25896	0.748602	0.947239	565.452	-0.170482	0.257912	0.357051	0.795536
RMER17C-int	ERVK	793.983	-9.95201e-05	0.0325449	0.979499	0.99737	121.294	0.044904	0.266804	0.834797	0.966253	121.294	-0.384056	0.322863	0.0741846	0.396178
MLTR31A_MM	ERVK	141.044	-0.00330609	0.0342672	0.55689	0.99737	27.1346	-0.0201087	0.347672	0.919322	0.984016	27.1346	-0.289171	0.426807	0.118645	0.498082
MLTR11A	ERVK	1280.54	0.00996605	0.0348908	0.33806	0.99737	234.97	0.199806	0.331988	0.377537	0.791578	234.97	-0.143203	0.300179	0.426344	0.836544
MMAR1	TcMar-Mariner	463.709	-0.00202671	0.0335433	0.798281	0.99737	89.7979	0.0878391	0.299268	0.685487	0.927556	89.7979	-0.293173	0.341443	0.1502	0.558397
MLTR18_MM	ERVK	317.941	0.0059081	0.0337974	0.529556	0.99737	54.2486	0.434269	0.389438	0.0933603	0.433154	54.2486	0.179092	0.305404	0.337067	0.77925
MT2B	ERVL	3902.26	0.00772716	0.0318518	0.588108	0.99737	658.058	1.04466	0.344691	0.000323037	0.00832773	658.058	0.549092	0.337051	0.0217586	0.196863
LTR90A	LTR	35.1745	0.00352904	0.0345894	0.338424	0.99737	1.9543	0.175319	0.450861	0.233933	0.669878	1.9543	0.040264	0.346963	0.662166
7SK	RNA	243.764	-0.00463998	0.0339344	0.555363	0.99737	24.5163	0.0451137	0.32519	0.832594	0.965954	24.5163	-0.0841188	0.299765	0.618016	0.920323
L1M3de	L1	118.709	-0.00410148	0.034319	0.496572	0.99737	22.3775	-0.460451	0.426816	0.0833891	0.408499	22.3775	-0.372844	0.413229	0.0858358	0.426957
L1VL2	L1	3963.7	-0.0139644	0.0358982	0.218955	0.99737	1278.53	0.136498	0.350308	0.521888	0.864801	1278.53	-0.0615205	0.303148	0.703293	0.945878
RMER3D-int	ERVK	798.454	0.00218144	0.0329415	0.829283	0.99737	181.84	0.103091	0.288866	0.633719	0.909436	181.84	-0.240075	0.305191	0.222907	0.668434
Tigger1	TcMar-Tigger	1123.21	0.00160977	0.0327997	0.875034	0.99737	168.178	0.00157063	0.29769	0.995913	0.998881	168.178	-0.235003	0.320299	0.226868	0.672936
L1MB1	L1	763.799	-0.00448536	0.0331269	0.664759	0.99737	239.451	0.0262223	0.31931	0.90465	0.980535	239.451	-0.144065	0.310255	0.416521	0.830275
MER52-int	ERV1	40.3579	-0.000266005	0.0343076	0.942252	0.99737	19.5573	0.141958	0.368958	0.494398	0.854502	19.5573	0.0294817	0.31021	0.848427	0.973514
ORR1D1-int	ERVL-MaLR	1100.22	-0.00885344	0.0343334	0.403601	0.99737	235.122	0.11432	0.266614	0.585447	0.892036	235.122	-0.383549	0.314564	0.0724026	0.391809
RLTR21	ERVK	1051.73	-0.00755259	0.0339427	0.456902	0.99737	350.588	0.0941185	0.314041	0.660568	0.919272	350.588	-0.123081	0.295139	0.491183	0.872526
RLTR53B_Mm	ERVK	36.3419	-0.00426198	0.0346645	0.289612	0.99737	3.86704	0.0892441	0.405648	0.56035	0.882864	3.86704	-0.0421136	0.342907	0.673609	0.938015
UCON4	Unknown	65.8533	-0.00326134	0.0344001	0.502421	0.99737	7.35206	-0.130612	0.379355	0.509003	0.861821	7.35206	-1.3401	0.995716	0.00613952	0.0875959
MER106B	hAT-Charlie	105.176	-0.00259851	0.0340148	0.67529	0.99737	33.7833	-0.167597	0.389027	0.411299	0.813135	33.7833	-0.238421	0.402538	0.157834	0.572012
LTR37A	ERV1	160.715	0.00267937	0.033902	0.709288	0.99737	28.0985	0.130191	0.351768	0.541472	0.87397	28.0985	-0.0715438	0.3082	0.656892	0.932845
MLTR32C_MM	ERVK	89.7754	0.0122698	0.0371156	0.0661821	0.851086	10.5597	0.0619626	0.376074	0.739443	0.944717	10.5597	-0.0256001	0.326097	0.842634	0.972877
RLTR18	ERVK	545.979	-0.00517069	0.0330168	0.636924	0.99737	69.8374	0.245351	0.32227	0.285201	0.718567	69.8374	-0.131808	0.284815	0.466646	0.860068
RLTR30	ERV1	253.35	0.0111515	0.0362429	0.150735	0.99737	30.1877	0.300728	0.351812	0.20512	0.637054	30.1877	-0.134891	0.296129	0.454742	0.853009
BGLII_B	ERVK	530.326	-0.00898222	0.0354734	0.209961	0.99737	119.079	-0.0672952	0.297228	0.751266	0.947707	119.079	-0.208379	0.306856	0.27293	0.723651
L1M4c	L1	880.964	-0.0045537	0.0336922	0.606533	0.99737	236.08	-0.0519516	0.285955	0.805466	0.958133	236.08	-0.205169	0.294272	0.28272	0.731002
PB1D9	Alu	34226.4	-0.00762436	0.0332164	0.512031	0.99737	4369.34	0.0972075	0.280778	0.636774	0.911047	4369.34	-0.171456	0.276847	0.363301	0.797898
ORR1F-int	ERVL-MaLR	253.711	0.00222618	0.0335479	0.785342	0.99737	44.8115	-0.180254	0.330904	0.415441	0.815391	44.8115	-0.326009	0.376898	0.121026	0.502883
ETnERV2-int	ERVK	1535.26	0.405603	0.154799	0.000283987	0.0240515	240.319	0.0573045	0.261498	0.782228	0.953564	240.319	-0.0390039	0.243035	0.82673	0.971197
RLTR1B	ERV1	893.343	-0.000375495	0.0340149	0.951112	0.99737	240.818	-0.0574957	0.237533	0.764137	0.949549	240.818	-0.0934255	0.226631	0.593549	0.911937
RLTR1B-int	ERV1	23317.7	-0.00933243	0.0361804	0.0217855	0.52216	1155.86	-0.970194	0.266669	3.83731e-05	0.00142101	1155.86	-0.610725	0.266153	0.00396424	0.0650897
MMERGLN-int	ERV1	2342.93	0.0233351	0.0433914	0.0730447	0.879263	1307.35	-0.135225	0.318619	0.532494	0.869592	1307.35	-0.221634	0.324641	0.24675	0.695222
L1MA10	L1	203.171	0.00371949	0.0339221	0.625877	0.99737	53.7402	0.0428081	0.309289	0.84265	0.967211	53.7402	-0.374168	0.404091	0.0872352	0.429941
MER44B	TcMar-Tigger	1051.8	-0.00671248	0.0333602	0.602458	0.99737	149.73	0.0473088	0.319268	0.827537	0.964484	149.73	-0.172771	0.319388	0.339139	0.780669
RMER21B	ERV1	453.139	0.00346247	0.0332746	0.684887	0.99737	59.6123	0.197821	0.359902	0.374066	0.788854	59.6123	0.0829466	0.30245	0.622307	0.920898
L1ME1	L1	2791.44	-0.00262652	0.0326756	0.79619	0.99737	732.979	0.0641614	0.306018	0.770485	0.950887	732.979	-0.197399	0.312913	0.294115	0.74247
L1MA7	L1	1237.32	-0.00686475	0.0336498	0.508299	0.99737	302.712	-0.00737026	0.305088	0.970589	0.993806	302.712	-0.339369	0.376361	0.110024	0.482255
ORR1C1-int	ERVL-MaLR	387.339	0.00284915	0.0332847	0.745005	0.99737	304.483	-0.419469	0.281666	0.0598448	0.33974	304.483	-0.494617	0.297015	0.0236637	0.208093
ID2	ID	3445.35	-0.0224536	0.039144	0.175666	0.99737	511.617	0.0437857	0.28329	0.839229	0.966835	511.617	-0.202511	0.291348	0.288166	0.736762
L1MDa	L1	1147.05	-0.00792408	0.0335735	0.483786	0.99737	304.486	-0.0210249	0.276608	0.913903	0.982925	304.486	-0.271209	0.304637	0.174788	0.600773
LTR78B	ERV1	123.214	-0.000593751	0.0340082	0.917811	0.99737	25.108	-0.0539755	0.352507	0.784514	0.953696	25.108	-0.362439	0.496466	0.0721576	0.390946
RLTR13B2	ERVK	508.29	-0.778956	0.148922	6.9062e-09	1.52075e-06	90.9702	-0.21065	0.354726	0.344299	0.766515	90.9702	-0.336577	0.40623	0.106772	0.474945
MLT1K	ERVL-MaLR	1323.33	0.00571473	0.0328481	0.621875	0.99737	177.941	0.410079	0.330933	0.091831	0.429598	177.941	0.0529094	0.256454	0.768706	0.962256
Charlie1a	hAT-Charlie	2406.5	-0.00490409	0.0336722	0.617128	0.99737	437.588	-0.0151289	0.298187	0.939664	0.98805	437.588	-0.232261	0.319054	0.231198	0.676075
RMER19C	ERVK	1047.87	0.0261665	0.0458525	0.0604857	0.823005	213.5	0.281784	0.309245	0.218987	0.65384	213.5	0.0360306	0.25649	0.844399	0.973489
L1ME3A	L1	880.902	0.00372785	0.0333591	0.688447	0.99737	195.731	-0.0117571	0.301394	0.948995	0.990513	195.731	-0.205858	0.313437	0.277371	0.726253
IAPLTR2_Mm	ERVK	632.966	0.0165793	0.0382717	0.111882	0.99737	142.584	0.439532	0.411232	0.093961	0.434366	142.584	0.217654	0.327396	0.257413	0.705713
IAPEz-int	ERVK	11586.5	-0.00406763	0.034209	0.546433	0.99737	2747.24	0.0678733	0.336556	0.754191	0.948028	2747.24	-0.00831972	0.296278	0.955074	0.991281
IAPEY4_I-int	ERVK	1337.49	0.764097	0.143347	4.10388e-09	1.30529e-06	65.0825	0.201997	0.358771	0.366375	0.78517	65.0825	-0.00672974	0.293673	0.970224	0.994919
L1M1	L1	173.758	0.00803749	0.03487	0.317421	0.99737	40.5476	-0.0142394	0.338651	0.94241	0.98883	40.5476	-0.38111	0.484148	0.0732544	0.39374
Plat_L3	CR1	164.466	-0.00704371	0.0348967	0.283534	0.99737	29.5227	0.0342494	0.348885	0.86771	0.972083	29.5227	-0.114111	0.327072	0.467476	0.860222
B2_Mm1a	B2	29458.2	0.00329401	0.0342263	0.575865	0.99737	249092	0.0242358	0.406151			249092	-0.00810982	0.343872
L1MB2	L1	1764.63	-0.00809771	0.0336551	0.472499	0.99737	426.239	0.00142663	0.310343	0.997313	0.999152	426.239	-0.233897	0.33509	0.223684	0.669076
RMER17D2	ERVK	197.881	-0.00384551	0.034243	0.535955	0.99737	108.815	0.248332	0.374569	0.282173	0.716591	108.815	-0.10545	0.308353	0.531655	0.890766
Tigger17a	TcMar-Tigger	883.484	-0.0177281	0.0386647	0.13115	0.99737	171.512	-0.0548905	0.291857	0.79451	0.956954	171.512	-0.267056	0.321643	0.187643	0.620197
ORR1A4	ERVL-MaLR	4550.44	0.0113626	0.0332086	0.438195	0.99737	875.47	0.248274	0.30579	0.270413	0.70699	875.47	-0.0352198	0.258131	0.841082	0.972291
Tigger17c	TcMar-Tigger	390.969	-0.0166065	0.0385671	0.117501	0.99737	64.3333	-0.230449	0.294	0.295002	0.727485	64.3333	-0.233838	0.288173	0.227188	0.673171
BGLII_B2	ERVK	170.996	-0.00822206	0.0350899	0.268582	0.99737	29.8094	0.0702121	0.328885	0.739075	0.944717	29.8094	0.0904257	0.300757	0.595486	0.912919
RLTR12B	ERVK	783.14	-0.00773859	0.0339075	0.456699	0.99737	150.747	0.10935	0.287813	0.609796	0.900741	150.747	-0.0795875	0.264943	0.656649	0.932845
MLTR14	ERV1	3158.65	0.00290451	0.0316673	0.818595	0.99737	453.31	0.182988	0.264155	0.38577	0.797641	453.31	-0.161863	0.252181	0.376603	0.805721
RMER12	ERVK	1373.65	-0.000509576	0.0321692	0.9881	0.99737	328.291	0.0675163	0.291938	0.752689	0.94787	328.291	-0.169848	0.289907	0.361557	0.796871
RLTR41A2	ERV1	154.273	0.0178898	0.0407496	0.0225537	0.52216	40.4536	-0.233966	0.309845	0.292573	0.726036	40.4536	-0.887226	0.426755	0.00311701	0.0547153
MERV1_I-int	ERV1	958.293	0.00253808	0.0326108	0.842825	0.99737	131.718	0.223399	0.347055	0.328197	0.754536	131.718	-0.0926489	0.29411	0.591992	0.911452
L1ME3G	L1	497.618	-0.0100779	0.0350532	0.311712	0.99737	85.4168	0.10069	0.334039	0.638707	0.911736	85.4168	-0.18071	0.332132	0.309884	0.756468
L1ME3B	L1	315.489	-0.00368392	0.033716	0.656751	0.99737	100.189	-0.0778712	0.323574	0.712826	0.936789	100.189	-0.225502	0.342091	0.231726	0.676348
Kanga1a	TcMar-Tc2	81.0896	0.0071621	0.0350973	0.217303	0.99737	15.1068	-0.0475421	0.364929	0.802394	0.958133	15.1068	-0.0291293	0.31739	0.840082	0.972291
RLTR31D_MM	ERVK	1434.65	-0.00869372	0.0344019	0.380948	0.99737	324.43	0.072307	0.297681	0.738791	0.94465	324.43	-0.256292	0.32481	0.194935	0.6332
Kanga1c	TcMar-Tc2	80.7171	-0.00267783	0.0343181	0.579452	0.99737	9.5707	-0.0556331	0.381711	0.751197	0.947707	9.5707	-0.186334	0.390597	0.176575	0.603368
LTR16A	ERVL	381.418	0.0040356	0.0333903	0.66057	0.99737	77.5243	0.0315521	0.313795	0.883877	0.975146	77.5243	-0.011993	0.282789	0.94188	0.987766
Tigger5	TcMar-Tigger	868.28	-0.0102383	0.034247	0.342504	0.99737	136.967	0.106237	0.316251	0.626559	0.90731	136.967	-0.183413	0.314815	0.318981	0.762893
RLTR10A	ERVK	195.966	0.00455109	0.0343141	0.479615	0.99737	63.9426	0.453843	0.338803	0.0660718	0.358783	63.9426	0.0812499	0.260159	0.651938	0.931241
MuLV-int	ERV1	102.076	0.0016216	0.0340226	0.788216	0.99737	87.2157	0.377493	0.445295	0.134519	0.52332	87.2157	0.0338453	0.301458	0.837613	0.971771
MLT1L	ERVL-MaLR	597.551	0.00664843	0.0341443	0.430788	0.99737	82.1366	0.223873	0.316515	0.322294	0.750361	82.1366	-0.114765	0.279652	0.523173	0.88888
RMER6D	ERVK	665.311	-0.0112231	0.0353686	0.268847	0.99737	144.193	0.0193418	0.320278	0.929546	0.986033	144.193	-0.256503	0.359786	0.183674	0.614631
LTR40b	ERVL	321.313	0.0103107	0.0354372	0.254167	0.99737	34.0877	0.15669	0.336265	0.475402	0.8456	34.0877	-0.145639	0.31266	0.408058	0.825822
RLTR20A4	ERVK	2051.84	-0.010192	0.0341677	0.207203	0.99737	658.802	0.0814843	0.328675	0.703755	0.933294	658.802	-0.173134	0.325468	0.332979	0.77715
ORR1A0	ERVL-MaLR	2386.93	7.47542e-05	0.0336768	0.992097	0.99737	1113.97	0.179694	0.425591			1113.97	0.0939843	0.344768
LTR10_RN	ERVK	291.142	-0.00360212	0.0336829	0.669738	0.99737	47.5026	-0.106204	0.312057	0.621867	0.904523	47.5026	-0.328267	0.373236	0.116049	0.492954
RLTR13C2	ERVK	633.819	-0.00977426	0.0342609	0.389284	0.99737	78.6024	0.267878	0.350023	0.252938	0.689358	78.6024	0.0351453	0.280425	0.841214	0.972291
ID	ID	3800.67	-0.0173068	0.0359136	0.339975	0.99737	449.418	0.0917965	0.281298	0.668836	0.922876	449.418	-0.138842	0.270734	0.449475	0.84905
RLTR19	ERVK	523.792	0.0144604	0.0368754	0.178596	0.99737	105.772	0.579491	0.379533	0.0326021	0.233712	105.772	0.208593	0.295499	0.27914	0.728539
L1MB5	L1	2602.83	-0.00267064	0.0326902	0.813025	0.99737	553.085	0.062383	0.298464	0.766875	0.950055	553.085	-0.123813	0.284197	0.493456	0.873299
RMER1C	Other	1311.01	0.006001	0.0331181	0.591406	0.99737	413.491	0.265557	0.337459	0.255063	0.691427	413.491	-0.118484	0.286621	0.511185	0.882761
RLTR42	ERVK	102.775	4.97973e-05	0.0340636	0.971822	0.99737	12.4228	-0.188056	0.392484	0.358975	0.77981	12.4228	-0.163688	0.352115	0.29695	0.745881
MER46C	TcMar-Tigger	532.144	-0.00516245	0.0336621	0.582039	0.99737	84.2025	0.110787	0.311714	0.611472	0.900836	84.2025	-0.113668	0.289985	0.522446	0.888596
Kanga1b	TcMar-Tc2	57.7219	-0.000265235	0.0342402	0.951156	0.99737	20.0711	-0.256824	0.425482	0.235546	0.672206	20.0711	-0.237857	0.397376	0.165808	0.585312
RMER6B	ERVK	935.008	0.00323298	0.0332062	0.74183	0.99737	130.29	0.268731	0.31665	0.2418	0.679379	130.29	-0.103704	0.271345	0.564801	0.901385
Charlie4	hAT-Charlie	73.1856	0.00226424	0.0342458	0.679235	0.99737	10.8437	-0.0875772	0.368839	0.649691	0.914947	10.8437	-0.35914	0.524628	0.0645036	0.371006
Charlie19a	hAT-Charlie	184.5	-0.00810683	0.0351518	0.239169	0.99737	18.2121	0.154594	0.351617	0.47856	0.847366	18.2121	-0.0783002	0.306663	0.632531	0.924757
RMER6A	ERVK	5193.44	-0.015489	0.0372924	0.173441	0.99737	5332.66	-0.050905	0.399316			5332.66	-0.0416131	0.340819
CYRA11_Mm	Y-chromosome	185.152	-0.00806099	0.0348799	0.319901	0.99737	37.4019	-0.0906443	0.367531	0.643496	0.913174	37.4019	-0.0148832	0.313811	0.917474	0.9851
RLTR48A	ERV1	495.374	0.0278318	0.0497358	0.026147	0.553344	47.9713	0.322388	0.333004	0.174352	0.590712	47.9713	-0.118114	0.277803	0.516268	0.885003
RMER13B	ERVK	1543.39	-0.0122437	0.0353489	0.414041	0.99737	170.39	0.134656	0.332088	0.536656	0.871794	170.39	-0.0176182	0.287488	0.915471	0.984447
L1ME3E	L1	154.128	-0.0064657	0.0344514	0.405091	0.99737	21.8301	-0.0783093	0.330312	0.709187	0.93594	21.8301	-0.389192	0.454834	0.0754178	0.398558
MMERGLN_LTR	ERV1	287.682	0.00793962	0.0355022	0.111747	0.99737	298.365	-0.0361449	0.258958	0.859702	0.970849	298.365	-0.207443	0.265847	0.272296	0.723087
RLTR1A2_MM	ERV1	350.51	0.00814359	0.0344035	0.393911	0.99737	87.9726	-0.00463482	0.248101	0.981034	0.996325	87.9726	-0.264316	0.268593	0.171529	0.595536
RLTR12BD_Mm	ERVK	671.771	0.00712462	0.0332117	0.53549	0.99737	85.9136	0.173062	0.341439	0.436231	0.826727	85.9136	-0.0766273	0.295288	0.654537	0.932628
Helitron1Nb_Mam	Helitron	59.229	0.0101913	0.0365816	0.00857881	0.359679	6.21022	0.14534	0.421533	0.373543	0.788518	6.21022	0.0396966	0.338778	0.72604	0.950524
RLTR10B2	ERVK	163.539	0.00990369	0.0358058	0.171281	0.99737	67.2924	0.138117	0.320746	0.53008	0.869012	67.2924	-0.0746415	0.286162	0.666866	0.936163
RLTR10-int	ERVK	1378.31	0.00185537	0.0336099	0.854458	0.99737	739.464	0.14241	0.314111	0.519838	0.864467	739.464	0.0499582	0.27614	0.773144	0.963195
IAP-d-int	ERVK	1257.31	0.0379487	0.0660072	0.0182906	0.487254	89.1422	-0.0138586	0.290253	0.946347	0.989614	89.1422	-0.040683	0.266692	0.817023	0.970463
IAPEY3-int	ERVK	750.106	0.00610561	0.0341565	0.469815	0.99737	115.899	0.240601	0.395283	0.281517	0.716591	115.899	-0.00723638	0.30494	0.977795	0.997122
RLTR18B	ERVK	904.06	-0.00559945	0.032709	0.615663	0.99737	143.531	0.188149	0.299654	0.394213	0.801742	143.531	-0.0850558	0.266846	0.63463	0.925753
MER68B	ERVL	326.442	0.000125873	0.033323	0.987655	0.99737	43.5874	0.0387326	0.302398	0.858226	0.970559	43.5874	-0.00293678	0.274674	0.986651	0.998553
L1M4a2	L1	247.295	-0.000391835	0.0337895	0.954617	0.99737	54.0788	-0.080689	0.331761	0.700943	0.932276	54.0788	-0.258048	0.369631	0.177005	0.604464
MMERVK10D3_I-int	ERVK	381.367	0.407619	0.160706	0.000354527	0.027881	69.2017	0.214506	0.307351	0.336948	0.760496	69.2017	0.0898396	0.268443	0.618736	0.920456
MMERVK10C-int	ERVK	3612.97	0.0193491	0.0392295	0.131223	0.99737	572.749	0.110574	0.286484	0.60122	0.897287	572.749	-0.119693	0.270025	0.509902	0.882761
BGLII_A	ERVK	140.028	-0.00256905	0.0341646	0.650419	0.99737	14.3362	0.112235	0.339065	0.597771	0.895297	14.3362	-0.0336752	0.296824	0.836084	0.97128
RLTR34C_MM	ERVK	175.118	-0.00416999	0.0345074	0.41778	0.99737	27.8843	0.222265	0.362483	0.326565	0.753651	27.8843	0.0273969	0.293972	0.869889	0.976386
ORR1D2-int	ERVL-MaLR	545.117	-0.00802279	0.0344602	0.371687	0.99737	119.722	-0.125185	0.285315	0.557087	0.881706	119.722	-0.167273	0.277053	0.368654	0.79975
MLTR12	ERV1	349.991	0.000297015	0.0332846	0.972942	0.99737	44.1496	0.148088	0.315985	0.50092	0.857233	44.1496	-0.0921943	0.285554	0.599335	0.914374
RLTR1E_MM	ERV1	14.9561	-0.00201004	0.0344873	0.461293	0.99737	5.46812	0.042958	0.37837	0.812165	0.959969	5.46812	-0.0635884	0.334449	0.62279	0.920898
L1MEc	L1	1889.03	-0.00836533	0.0339402	0.412853	0.99737	503.891	0.0215882	0.298989	0.923132	0.984525	503.891	-0.270523	0.335358	0.175272	0.60103
RLTR20B3A_MM	ERVK	315.766	-0.000538615	0.0339011	0.910491	0.99737	76.1831	0.280517	0.322331	0.225828	0.660727	76.1831	-0.20043	0.297732	0.292471	0.741556
RMER17B2	ERVK	565.896	0.00341754	0.0337101	0.67394	0.99737	95.1544	0.0767275	0.322092	0.720558	0.939761	95.1544	-0.133986	0.307026	0.445272	0.845476
MamRep137	TcMar-Tigger	221.773	0.00388785	0.0338321	0.626983	0.99737	37.9605	-0.00122415	0.348594	0.992735	0.997697	37.9605	-0.122928	0.329895	0.437147	0.841139
LTR108c_Mam		1.50902	0.000465876	0.0345098	0.517877	0.99737
RLTR30E_MM	ERV1	447.678	-0.00389561	0.0342983	0.512253	0.99737	66.4886	-0.182541	0.271761	0.389028	0.798989	66.4886	-0.245173	0.2759	0.206517	0.648815
Looper	PiggyBac	193.851	0.002329	0.0337803	0.755538	0.99737	59.8967	0.137809	0.326622	0.529863	0.868973	59.8967	-0.127145	0.301979	0.47028	0.861196
LTR50	ERVL	402.715	0.00045989	0.0341424	0.923529	0.99737	65.9863	-0.0974131	0.236317	0.619573	0.903763	65.9863	-0.181461	0.236473	0.314718	0.760127
RLTR24B_MM	ERV1	302.239	-0.00757062	0.0342615	0.42461	0.99737	49.504	-0.0480512	0.256085	0.813161	0.960245	49.504	-0.136742	0.249589	0.453705	0.85232
Tigger5b	TcMar-Tigger	798.642	0.00264409	0.0329701	0.7602	0.99737	159.631	0.13601	0.295122	0.532127	0.869592	159.631	-0.196393	0.294348	0.300327	0.748281
MER47B	TcMar-Tigger	192.889	-0.00509213	0.0339729	0.545886	0.99737	60.3254	0.126491	0.314884	0.562803	0.883093	60.3254	-0.0449945	0.279553	0.793996	0.966322
RMER15-int	ERVL	1486.09	-0.00842341	0.0331737	0.49756	0.99737	388.641	0.0750561	0.301105	0.729695	0.942419	388.641	-0.13657	0.288928	0.451979	0.851053
ORR1A3-int	ERVL-MaLR	1169.54	0.000251208	0.0324706	0.974537	0.99737	656.958	0.558738	0.468258	0.0520911	0.310723	656.958	0.237705	0.344732	0.217401	0.66319
Lx2A	L1	250.056	0.00457534	0.0337583	0.617943	0.99737	92.2352	0.164072	0.382703	0.429863	0.822973	92.2352	0.0204883	0.312827	0.894598	0.979415
RMER2	ERV1	728.029	0.000612649	0.0325782	0.95701	0.99737	125.036	0.485261	0.429838	0.0738827	0.383389	125.036	-0.0675847	0.289173	0.69597	0.942974
MurERV4-int	ERVK	1617.2	-0.00298102	0.0331764	0.753916	0.99737	315.22	0.151352	0.308561	0.493001	0.853948	315.22	-0.0754439	0.275369	0.669442	0.936711
RLTR1	ERV1	5.06681	0.000263156	0.0344852	0.853101	0.99737	1.37532	-0.0748594	0.427254	0.343898		1.37532	0.0764485	0.359413	0.342537
RLTR40	ERVK	1639.64	-0.00268951	0.0328318	0.801226	0.99737	563.353	-0.0555249	0.30358	0.793896	0.956836	563.353	-0.25513	0.332171	0.19569	0.633855
RMER19A	ERVK	1120.79	0.00845556	0.0330673	0.476801	0.99737	230.57	0.164837	0.30432	0.457259	0.837317	230.57	-0.0465926	0.267744	0.792752	0.966185
RMER13A1	ERVK	836.061	0.0125092	0.0350551	0.309812	0.99737	106.196	0.324155	0.380197	0.182801	0.602911	106.196	0.08116	0.291518	0.642322	0.92808
AmnSINE2	Deu	137.063	-0.0052183	0.0344087	0.431431	0.99737	19.017	0.199951	0.400551	0.337957	0.761075	19.017	-0.0228544	0.3172	0.872151	0.976386
MER65D	ERV1	48.4339	-0.00379331	0.0345264	0.390513	0.99737	2.2767	0.00328486	0.399561	0.982852	0.996325	2.2767	-0.0306083	0.342206	0.763108
RLTR16C_MM	ERVK	472.702	-0.00700518	0.0350958	0.209769	0.99737	57.0559	0.0298612	0.333575	0.889155	0.97598	57.0559	-0.0419138	0.299216	0.798462	0.967305
MamGypLTR2c	Gypsy	8.03627	-0.00189097	0.0345292	0.351697	0.99737	2.29847	-0.0852408	0.42426	0.437815	0.827819	2.29847	0.0116777	0.346846	0.884993
RLTR9A3B	ERVK	57.1923	0.00400906	0.0345239	0.401477	0.99737	10.2789	0.323222	0.483403	0.148248	0.54777	10.2789	0.108612	0.338922	0.452211	0.851053
MERVL-int	ERVL	25658.2	1.63355	0.307664	4.7422e-09	1.30529e-06	9230.58	0.459779	0.818705	0.0195646	0.172093	9230.58	0.245792	0.47166	0.0364554	0.26715
RMER12B	ERVK	506.832	0.0187995	0.0410126	0.0368572	0.634059	88.457	0.0799304	0.312758	0.713525	0.936892	88.457	-0.0814461	0.287096	0.638375	0.926929
MLT1F2	ERVL-MaLR	829.251	0.00313111	0.0330599	0.749515	0.99737	187.112	0.0949352	0.297661	0.661981	0.919667	187.112	-0.205984	0.30471	0.279399	0.728539
ERVB7_2-LTR_MM	ERVK	124.296	-0.00790819	0.0353265	0.181799	0.99737	32.0098	0.486693	0.458795	0.0741202	0.384126	32.0098	0.509279	0.499982	0.0437952	0.298791
L1MEi	L1	105.36	0.00250966	0.0340737	0.683857	0.99737	26.0974	-0.0479015	0.339499	0.814172	0.960651	26.0974	-0.251041	0.382812	0.170533	0.594752
MER68	ERVL	849.259	-0.0106907	0.0340795	0.391019	0.99737	99.3984	0.00450344	0.304735	0.987224	0.996756	99.3984	-0.148578	0.298764	0.412246	0.828184
MLT2D	ERVL	347.643	-0.0021369	0.03335	0.81022	0.99737	105.816	0.120263	0.316235	0.58267	0.890914	105.816	-0.0632382	0.28304	0.715499	0.948093
MERV1_LTR	ERV1	581.291	0.010233	0.0360066	0.170786	0.99737	56.747	0.0316137	0.289776	0.88268	0.975113	56.747	-0.00851071	0.26512	0.960466	0.9922
RLTR13A	ERVK	227.306	-0.015569	0.0390909	0.0307738	0.582173	44.6803	0.537258	0.340955	0.0346047	0.244066	44.6803	-0.0917588	0.261525	0.606809	0.916754
RMER19B2	ERVK	1463.62	-0.0262287	0.047347	0.0381558	0.646301	260.2	0.0157906	0.237221	0.940749	0.988448	260.2	-0.20404	0.243116	0.265718	0.715058
ORR1A0-int	ERVL-MaLR	3387.77	-0.000912661	0.0342893	0.836482	0.99737	2100.22	0.414355	0.63288			2100.22	0.22297	0.42275
RLTR50B	ERVK	76.2327	-0.00374997	0.0344323	0.46597	0.99737	17.1224	0.603876	0.495948	0.0420254	0.276069	17.1224	-0.0799572	0.302334	0.636389	0.926404
RLTR10F	ERVK	271.692	0.00388122	0.0343346	0.507705	0.99737	129.227	-0.228854	0.328112	0.311588	0.740417	129.227	-0.210592	0.310608	0.271062	0.721583
ORR1E-int	ERVL-MaLR	1109.47	0.000393744	0.0326338	0.951902	0.99737	148.622	-0.0127036	0.321411	0.949251	0.990513	148.622	-0.232486	0.348887	0.217078	0.662698
RMER17D	ERVK	632.758	-0.010967	0.0362901	0.129921	0.99737	64.7917	0.0156732	0.298746	0.943107	0.988986	64.7917	-0.417961	0.40251	0.065671	0.373853
MLT1J1	ERVL-MaLR	380.838	-0.00171416	0.0334826	0.841577	0.99737	49.9924	0.603517	0.39029	0.0288125	0.217642	49.9924	0.285036	0.324896	0.162856	0.580674
MT2B2	ERVL	1614.84	0.0537821	0.0906386	0.0235029	0.528095	398.398	1.23467	0.346372	3.75482e-05	0.00139303	398.398	0.766998	0.353495	0.00388709	0.0641107
MLTR18D_MM	ERVK	446.851	0.0159852	0.0377419	0.152675	0.99737	99.9129	0.179195	0.304966	0.42013	0.817712	99.9129	-0.038113	0.266421	0.830819	0.971197
RLTR11A2	ERVK	1836.82	-0.0230856	0.0422089	0.0905478	0.951541	344.415	0.115982	0.296712	0.59457	0.894979	344.415	-0.160588	0.287617	0.385758	0.810651
RLTR11A	ERVK	2075	-0.00739448	0.0345551	0.375546	0.99737	471.161	0.0108875	0.223249	0.956579	0.991132	471.161	-0.215563	0.229572	0.229367	0.675354
RLTR44B	ERVK	39.2842	0.00416329	0.034652	0.29658	0.99737	9.6736	0.548647	0.687941	0.0502853	0.304743	9.6736	0.239364	0.413887	0.141116	0.541122
RLTR44-int	ERVK	220.199	0.0167665	0.0398574	0.0296483	0.57268	47.4206	0.28424	0.368517	0.230286	0.66578	47.4206	-0.206267	0.33549	0.261024	0.709275
IAP1-MM_I-int	ERVK	289.536	0.0178512	0.0409506	0.0125616	0.461011	26.2232	0.0480064	0.353916	0.813073	0.960245	26.2232	-0.0435754	0.313771	0.77007	0.962725
RLTR44A	ERVK	66.5835	0.00741516	0.0354165	0.0943456	0.97079	9.15538	0.271089	0.482117	0.160935	0.569284	9.15538	0.0679551	0.339338	0.579989	0.906863
IAP1-MM_LTR	ERVK	76.2967	-0.0019388	0.034181	0.717551	0.99737	14.9928	-0.396874	0.492576	0.109398	0.470337	14.9928	-0.232473	0.383067	0.184634	0.615685
MER74A	ERVL	246.799	0.00996697	0.0352974	0.0768032	0.879263	45.073	-0.117139	0.281241	0.57969	0.889979	45.073	-1.01252	0.401893	0.000939294	0.0222392
RLTR26	ERVK	78.7432	0.010595	0.0364716	0.0624968	0.829024	40.0448	0.19014	0.293043	0.387246	0.798514	40.0448	-0.00850173	0.256864	0.960622	0.992305
MYSERV-int	ERVK	600.236	0.00319081	0.0334867	0.720465	0.99737	192.562	0.254323	0.279075	0.245366	0.682555	192.562	-0.290725	0.287047	0.145959	0.550915
MER21C	ERVL	1550.13	0.00454182	0.0322313	0.712014	0.99737	213.692	0.0424246	0.30746	0.846681	0.96777	213.692	-0.133207	0.295752	0.457907	0.854999
MLT2B1	ERVL	390.865	0.0151156	0.0376604	0.145406	0.99737	68.5928	0.108333	0.338541	0.611781	0.900836	68.5928	0.0565723	0.297658	0.73713	0.953256
MER54A	ERVL	131.49	0.000126536	0.0338828	0.965798	0.99737	28.7022	0.0711456	0.312657	0.739734	0.944717	28.7022	-0.331476	0.385244	0.115255	0.491292
MER34	ERV1	224.241	-0.00245361	0.0338483	0.733238	0.99737	55.9565	0.204649	0.361511	0.361068	0.78144	55.9565	0.0698447	0.300048	0.678913	0.938874
RLTR9A3A	ERVK	43.694	0.00883648	0.0359473	0.03954	0.649754	30.671	1.98538	0.666834	0.000182407	0.00528507	30.671	1.38312	0.726501	0.0028534	0.0507206
RLTR1C	ERV1	358.773	0.00908058	0.0348609	0.445164	0.99737	39.7771	0.280819	0.390822	0.231617	0.667066	39.7771	0.0583165	0.300467	0.72517	0.950524
MTEb	ERVL-MaLR	4467.03	0.00291479	0.0311093	0.523109	0.99737	780.95	0.0584477	0.26584	0.782017	0.95348	780.95	-0.214152	0.274584	0.261087	0.709275
RLTR9B2	ERVK	59.2169	0.00645193	0.035067	0.180962	0.99737	10.7943	0.381221	0.538765	0.102736	0.454934	10.7943	0.192145	0.382933	0.200254	0.640294
RLTR9C	ERVK	68.1674	-0.00405746	0.034461	0.405961	0.99737	9.85842	0.123784	0.357377	0.555499	0.880653	9.85842	0.0127559	0.305887	0.936043	0.987748
UCON15		1.6087	0.000977364	0.0345263	0.178498	0.99737
MTB_Mm	ERVL-MaLR	2894.66	0.00166751	0.0322136	0.850694	0.99737	454.061	0.157789	0.325621	0.475568	0.8456	454.061	-0.0531863	0.283204	0.757073	0.959974
RMER21A	ERV1	547.35	0.0174664	0.0389052	0.118948	0.99737	65.7378	0.528672	0.377685	0.0458703	0.290233	65.7378	0.0239411	0.265657	0.89383	0.979057
IAPLTR2a2_Mm	ERVK	318.572	-3.96604e-05	0.0336675	0.995368	0.998088	101.113	0.180878	0.33086	0.4184	0.816804	101.113	0.0473683	0.282536	0.786245	0.965582
L1MA9	L1	1436.63	-0.0125471	0.0347047	0.33865	0.99737	357.388	-0.00251901	0.28862	0.98835	0.996974	357.388	-0.335272	0.344973	0.11322	0.48815
RMER6BA	ERVK	480.388	0.0194574	0.0420853	0.0163251	0.487254	42.8963	0.0482396	0.303254	0.824001	0.963876	42.8963	-0.0587675	0.27881	0.734738	0.953008
ORR1A2-int	ERVL-MaLR	4796.87	0.0175276	0.040323	0.0321344	0.589666	1588	1.26884	0.476314	0.000636436	0.0141565	1588	0.512185	0.447795	0.0430706	0.296613
L1ME2z	L1	710.859	-0.00320767	0.0332917	0.73281	0.99737	255.739	-0.0659506	0.306588	0.755724	0.948108	255.739	-0.214367	0.319004	0.260813	0.709158
RLTR20B1	ERVK	728.269	-0.0270335	0.0488784	0.0276533	0.563821	99.2009	-0.10737	0.264248	0.604737	0.898482	99.2009	-0.276894	0.284264	0.161794	0.578908
LTR55	ERVL?	46.8788	0.00346897	0.0344732	0.440394	0.99737	7.23927	0.292467	0.486773	0.158144	0.565072	7.23927	0.0272739	0.330597	0.829438	0.971197
MLT1O	ERVL-MaLR	182.173	0.00843933	0.0350118	0.297201	0.99737	38.0969	-0.262749	0.341006	0.252522	0.688689	38.0969	-0.743541	0.487449	0.0112836	0.128831
RLTR23	ERV1	796.529	0.00165374	0.0323998	0.882777	0.99737	139.209	0.0132825	0.259996	0.950681	0.990725	139.209	-0.0990288	0.248623	0.580607	0.906863
L1ME4b	L1	914.252	0.00531707	0.0333367	0.610081	0.99737	243.886	0.0933053	0.289829	0.66509	0.921036	243.886	-0.102429	0.271123	0.567468	0.902777
RLTR18-int	ERVK	309.792	-0.0019533	0.0337198	0.808596	0.99737	61.1009	0.101907	0.316964	0.642399	0.913145	61.1009	-0.14035	0.302539	0.431403	0.837772
LTR29	ERV1	5.59269	-0.00100558	0.034498	0.527778	0.99737	1.5994	0.0264574	0.409823	0.828254	0.964532	1.5994	-0.130599	0.386257	0.0767196
MLTR18A_MM	ERVK	490.685	-0.000864334	0.0338484	0.90134	0.99737	131.353	-0.402372	0.356309	0.101583	0.452614	131.353	-0.913338	0.434246	0.00274526	0.0493743
RLTR26_Mus	ERVK	716.529	0.887253	0.155085	4.76613e-10	2.62375e-07	80.7324	0.340076	0.411237	0.166763	0.578748	80.7324	0.105098	0.307193	0.536451	0.892344
RLTR12A	ERVK	465.532	-0.00703082	0.0344464	0.401411	0.99737	115.201	0.175024	0.295292	0.425801	0.820851	115.201	0.0648895	0.261531	0.717753	0.948268
MLT1E1A	ERVL-MaLR	430.122	0.00568662	0.0337164	0.549805	0.99737	87.2541	0.0671638	0.342128	0.750365	0.947707	87.2541	0.0234574	0.300976	0.884775	0.977559
MER34A	ERV1	240.621	-0.0110823	0.0358887	0.205887	0.99737	33.3302	-0.0947834	0.323707	0.657441	0.918159	33.3302	-0.303278	0.382354	0.133209	0.523871
ORR1A4-int	ERVL-MaLR	3202.29	0.000198612	0.0337903	0.99848	0.999294	681.223	0.453915	0.291541	0.0493883	0.302572	681.223	0.0126838	0.232506	0.946604	0.989503
L1P5	L1	29.9538	-0.00508566	0.0348646	0.171639	0.99737	3.73198	0.0287526	0.385305	0.866082	0.971955	3.73198	-0.10504	0.352545	0.395367	0.817953
MLTR18C_MM	ERVK	311.401	0.00103791	0.0332216	0.909648	0.99737	68.9531	0.14945	0.304585	0.498323	0.855949	68.9531	-0.109868	0.279369	0.541295	0.894419
IAPLTR4	ERVK	238.557	0.0124976	0.0372931	0.0639178	0.83778	85.5343	-0.045413	0.323865	0.827294	0.964484	85.5343	-0.170225	0.322467	0.340837	0.782019
MLTR31F_MM	ERVK	181.263	0.00536508	0.034496	0.404487	0.99737	33.1733	0.19467	0.341994	0.388664	0.798989	33.1733	0.0950783	0.295328	0.585902	0.909
Ricksha_c	MULE-MuDR	122.008	0.000460888	0.0340723	0.932538	0.99737	11.0126	0.0307179	0.366918	0.873447	0.972712	11.0126	-0.251895	0.429546	0.116299	0.493466
RLTR9A2	ERVK	140.738	0.000625633	0.0340945	0.911587	0.99737	11.4462	0.0871138	0.349147	0.674754	0.924931	11.4462	-0.10025	0.319893	0.526982	0.889616
RLTR30D2_MM	ERV1	458.312	-0.0212927	0.0423594	0.0550933	0.787763	55.2515	0.441253	0.367308	0.0833971	0.408499	55.2515	-0.0672341	0.272917	0.703452	0.945962
Charlie4a	hAT-Charlie	555.142	-0.00129815	0.0332121	0.88317	0.99737	182.568	-0.0218364	0.258857	0.913062	0.982604	182.568	-0.252069	0.277117	0.194731	0.632899
RLTR47	ERVK	50.3096	-0.00482331	0.0346765	0.308731	0.99737	7.60336	0.09457	0.395166	0.584188	0.891544	7.60336	-0.00439878	0.3325	0.968298	0.994059
RLTR31B2	ERVK	829.407	-0.00736788	0.034075	0.477843	0.99737	133.552	0.295248	0.321422	0.20393	0.635592	133.552	-0.132647	0.276475	0.467188	0.860107
ORR1D-int	ERVL-MaLR	741.878	-0.0059425	0.0338375	0.524896	0.99737	106.868	-0.0267317	0.299304	0.897943	0.979184	106.868	-0.463178	0.417652	0.050628	0.323903
RLTR20D	ERVK	334.832	-0.0110893	0.0355641	0.255539	0.99737	70.9461	0.068963	0.295554	0.751062	0.947707	70.9461	-0.0872585	0.275387	0.619637	0.920456
ERVB4_1B-LTR_MM	ERVK	124.546	0.00508379	0.034617	0.350432	0.99737	30.6342	0.0687178	0.335365	0.745774	0.947042	30.6342	-0.179591	0.338629	0.302251	0.749922
RLTR33	ERVK	1032.75	0.0189077	0.0380083	0.141098	0.99737	215.179	0.150823	0.319534	0.494885	0.854502	215.179	-0.0409476	0.2789	0.812357	0.969359
Charlie12	hAT-Charlie	422.16	-0.0145714	0.0375724	0.282413	0.99737	58.9452	0.0459956	0.309015	0.829998	0.965102	58.9452	-0.189886	0.316322	0.303899	0.750834
MLTR73	ERV1	391.419	0.00643022	0.0336515	0.527674	0.99737	64.983	0.113553	0.264872	0.585579	0.8921	64.983	-0.149286	0.258174	0.416075	0.830203
LTRIS_Mus	ERV1	894.666	-0.00518638	0.0333832	0.610041	0.99737	150.463	0.708391	0.388275	0.0131345	0.131266	150.463	0.181555	0.28555	0.338773	0.780219
MuRRS-int	ERV1	349.492	0.00349156	0.0333006	0.711376	0.99737	160.627	1.64727	0.541748	0.000154667	0.00461432	160.627	0.722939	0.579954	0.0181157	0.174214
IAPLTR1_Mm	ERVK	1383.8	-0.00634479	0.0345471	0.355021	0.99737	284.985	-0.0423099	0.305929	0.840488	0.967015	284.985	-0.0499907	0.278406	0.770856	0.96274
RLTR4_MM-int	ERV1	1225.94	-0.00133977	0.0335541	0.877459	0.99737	196.253	0.133488	0.337619	0.535749	0.870887	196.253	-0.166417	0.32402	0.347306	0.785627
L1ME3Cz	L1	520.354	-0.0242141	0.0460416	0.0254784	0.553344	99.3888	0.0303809	0.318032	0.887991	0.975462	99.3888	-0.298228	0.378879	0.13913	0.536997
MER21B	ERVL	1675.39	0.000711526	0.0325008	0.953695	0.99737	259.024	0.125806	0.309498	0.565301	0.88448	259.024	-0.246584	0.328542	0.207851	0.65137
MER31B	ERV1	811.386	-0.00131372	0.0339595	0.859357	0.99737	58.5417	0.268802	0.274821	0.215274	0.648507	58.5417	-0.0923851	0.243709	0.607401	0.916892
ERVL-E-int	ERVL	371.521	0.00965506	0.0353568	0.253193	0.99737	62.5947	0.471179	0.397236	0.0746966	0.385909	62.5947	-0.0483418	0.27855	0.780751	0.964864
RLTR9A	ERVK	219.131	0.00824893	0.0349343	0.302952	0.99737	29.5892	0.00267707	0.358862	0.991533	0.997485	29.5892	-0.0231139	0.315405	0.866485	0.976165
MLT1H-int	ERVL-MaLR	73.1939	0.00141989	0.0342013	0.7773	0.99737	14.912	-0.12484	0.385305	0.514754	0.863153	14.912	-0.073553	0.328232	0.602594	0.915391
RLTR12H	ERVK	121.281	-0.00370598	0.0342687	0.5333	0.99737	21.9695	0.040539	0.34206	0.846451	0.96777	21.9695	-0.123193	0.324208	0.449384	0.849016
ERVB7_2B-LTR_MM	ERVK	162.646	0.00740762	0.0352224	0.184985	0.99737	41.7164	0.62724	0.43901	0.0308468	0.226588	41.7164	0.240869	0.329458	0.22075	0.666518
MER88	ERVL	36.9866	0.00154476	0.0343448	0.688753	0.99737	3.48764	-0.0395843	0.404962	0.765365	0.949549	3.48764	-0.0792974	0.355062	0.410871	0.827574
RLTR11C_MM	ERVK	384.764	-0.0255311	0.047924	0.0177729	0.487254	73.6628	0.459135	0.409291	0.0828943	0.407359	73.6628	0.0805377	0.286503	0.64681	0.929594
RLTR10D2	ERVK	96.1947	0.00307579	0.0345115	0.410355	0.99737	16.0152	0.16823	0.363997	0.436475	0.826738	16.0152	0.192667	0.347657	0.274568	0.724589
ORR1C2-int	ERVL-MaLR	734.945	-0.016999	0.0386384	0.118436	0.99737	188.857	0.0845578	0.283001	0.69223	0.929258	188.857	-0.144092	0.274342	0.432864	0.838631
RLTR34B_MM	ERVK	425.167	-0.00322994	0.0343554	0.516247	0.99737	54.1707	0.282856	0.299789	0.211081	0.643873	54.1707	-0.0045669	0.251426	0.978125	0.997232
RLTR13B1	ERVK	1086.3	-0.0194537	0.0400331	0.102555	0.99737	139.304	0.142299	0.309241	0.517255	0.864108	139.304	-0.00219028	0.271365	0.990069	0.998623
MER31A	ERV1	236.283	-0.0108814	0.0357532	0.219706	0.99737	39.9842	0.0285106	0.306353	0.894555	0.977989	39.9842	-0.307108	0.366957	0.133559	0.524682
MER57C2	ERV1	113.919	0.00416141	0.0341441	0.536367	0.99737	17.3581	0.270608	0.379035	0.245502	0.682555	17.3581	0.155335	0.319505	0.381043	0.807141
MER53	hAT	430.04	0.00337699	0.0337395	0.671494	0.99737	64.3918	-0.113486	0.318662	0.598355	0.895369	64.3918	-0.231577	0.334593	0.224548	0.670784
L1MA5A	L1	566.752	-0.00595415	0.0341379	0.361877	0.99737	176.169	0.0311463	0.300265	0.8859	0.97538	176.169	-0.275497	0.339409	0.171338	0.595536
MTEa-int	ERVL-MaLR	741.727	-0.0090176	0.0336888	0.427702	0.99737	199.901	0.435722	0.362276	0.0855969	0.413839	199.901	-0.0515798	0.268057	0.770027	0.962725
UCON11	Unknown	10.9385	0.00207466	0.0345448	0.309328	0.99737	1.73307	0.0176758	0.410833	0.876646	0.973411	1.73307	0.0646182	0.353736	0.4619
HAL1	L1	1782.08	-0.00525016	0.0328822	0.628532	0.99737	399.768	-0.0986234	0.292039	0.642913	0.913174	399.768	-0.333981	0.340864	0.112118	0.486705
Arthur1	hAT-Tip100	151.586	0.000941954	0.0338367	0.888623	0.99737	43.3685	0.183535	0.321196	0.411888	0.81342	43.3685	-0.0810105	0.282602	0.643858	0.928551
ORR1B2-int	ERVL-MaLR	433.575	0.00480604	0.0337529	0.589484	0.99737	118.918	0.0883426	0.280373	0.680879	0.926094	118.918	-0.231081	0.294576	0.232041	0.676485
Tigger9b	TcMar-Tigger	322.137	-0.00656477	0.0341098	0.464134	0.99737	35.7536	0.165645	0.346746	0.449476	0.831948	35.7536	0.0779005	0.298565	0.647123	0.929594
MLT1J2	ERVL-MaLR	353.874	0.00389174	0.0334312	0.673841	0.99737	64.1505	0.207581	0.347651	0.360166	0.780404	64.1505	-0.0446737	0.289734	0.790882	0.966185
MER121	TcMar?	60.6808	0.00153907	0.0342775	0.726696	0.99737	13.9412	0.14678	0.343149	0.5042	0.859409	13.9412	-0.0818113	0.302385	0.631055	0.924149
ERVB4_1-LTR_MM		4.80325	-0.00151552	0.0345343	0.280072	0.99737
ORR1G-int	ERVL-MaLR	6.79275	0.0026654	0.0346174	0.15075	0.99737	3.19783	0.109273	0.417272	0.43983	0.828384	3.19783	-0.0610491	0.349289	0.529163	0.889912
RLTR17D_Mm	ERVK	690.158	0.0044568	0.0335458	0.63539	0.99737	119.543	0.197823	0.303228	0.3732	0.788518	119.543	-0.204646	0.295868	0.284057	0.732095
L1MA8	L1	1163.02	-0.00754889	0.0332171	0.559425	0.99737	298.167	0.00719946	0.317495	0.975555	0.994947	298.167	-0.123737	0.302783	0.481008	0.866648
MLT1E3	ERVL-MaLR	334.077	0.005176	0.0339988	0.528758	0.99737	54.4879	0.0230085	0.316579	0.915557	0.983325	54.4879	-0.182867	0.322101	0.315001	0.76021
MLTR18B_MM	ERVK	398.597	0.013579	0.0369432	0.160305	0.99737	91.7447	0.0410517	0.313612	0.851816	0.968593	91.7447	-0.121678	0.298311	0.490278	0.871918
RLTR19-int	ERVK	1639.93	0.00431163	0.0343725	0.475171	0.99737	652.114	-0.0362049	0.184021	0.82591	0.964214	652.114	-0.464896	0.203753	0.00737109	0.0983752
ORR1A1	ERVL-MaLR	2198.02	0.00877132	0.0333124	0.483869	0.99737	1165.41	0.325969	0.527724			1165.41	0.162539	0.375897
ORR1A1-int	ERVL-MaLR	1738.93	0.0210156	0.0425303	0.0462685	0.710978	2360.07	2.20788	1.04572			2360.07	1.53056	1.29992
RLTR10	ERVK	495.013	-0.0035144	0.0343299	0.520031	0.99737	279.765	0.272679	0.373196	0.246928	0.683245	279.765	0.0973416	0.299045	0.573229	0.905248
L3b	CR1	930.323	-0.00596679	0.0331289	0.506849	0.99737	151.537	0.0263288	0.3013	0.902996	0.980304	151.537	-0.168163	0.300882	0.361997	0.797055
MARNA	TcMar-Mariner	331.491	0.00286255	0.0332727	0.76087	0.99737	39.2596	-0.291458	0.331253	0.207807	0.639758	39.2596	-0.557653	0.419122	0.0276563	0.22869
MER44A	TcMar-Tigger	322.044	0.00745219	0.034869	0.307863	0.99737	117.786	0.145116	0.327192	0.511833	0.862087	117.786	0.0208509	0.283006	0.90611	0.982568
MER110A	ERV1	36.1724	-0.00152933	0.0344016	0.644232	0.99737	5.60676	0.0386705	0.384882	0.817504	0.961646	5.60676	0.163991	0.373531	0.24194	0.689088
MER92D	ERV1	7.60374	0.000772102	0.0344652	0.698994	0.99737	2.14249	0.0340675	0.408174	0.783273	0.953696	2.14249	-0.0352752	0.347276	0.690747
MER90	ERV1	91.0109	-0.00123647	0.0341217	0.822485	0.99737	11.2147	0.244316	0.427984	0.252113	0.688423	11.2147	0.0898604	0.331218	0.533003	0.890903
RLTR13D6	ERVK	444.833	-0.00502483	0.0337436	0.574398	0.99737	107.725	0.121883	0.327634	0.577881	0.889718	107.725	-0.00151526	0.285586	0.990836	0.998623
MTB_Mm-int	ERVL-MaLR	257.911	-0.00416155	0.0339789	0.566285	0.99737	93.3541	0.787654	0.867777	0.0251235	0.200644	93.3541	0.291623	0.45774	0.0990294	0.458569
RLTR9B	ERVK	82.4774	0.0183475	0.0414484	0.00878605	0.359679	17.0017	0.137249	0.368759	0.510385	0.861824	17.0017	0.0654503	0.315775	0.671109	0.936813
RMER16	ERVK	290.972	-0.0121349	0.0364642	0.15769	0.99737	37.0017	0.456402	0.392153	0.0807544	0.40104	37.0017	0.051654	0.278282	0.769354	0.962601
ERVB2_1A-I_MM-int	ERVK	276.509	-0.0023034	0.0335925	0.776918	0.99737	54.4589	0.277932	0.316261	0.225745	0.660727	54.4589	0.0140682	0.261246	0.938029	0.987748
MRLTR33	ERVK	763.75	-0.0105375	0.0350705	0.303424	0.99737	59.2994	0.0767135	0.278724	0.718882	0.938943	59.2994	-0.244609	0.299095	0.211665	0.656618
RLTR12D	ERVK	422.786	-0.0120204	0.0360134	0.208497	0.99737	90.3653	0.12966	0.28732	0.550264	0.8785	90.3653	-0.152436	0.27688	0.409771	0.827036
RLTR12E	ERVK	550.098	-0.00758581	0.034784	0.316729	0.99737	79.9816	0.110365	0.321509	0.610413	0.900779	79.9816	-0.145532	0.306739	0.414095	0.828869
LTRIS4A	ERV1	248.875	0.0241608	0.0463958	0.0180538	0.487254	125.221	0.185007	0.288212	0.39795	0.803447	125.221	-0.0771124	0.258094	0.666066	0.935937
LTR89	ERVL?	45.089	0.00167361	0.0343341	0.677707	0.99737	8.64242	-0.0377911	0.385297	0.82085	0.962822	8.64242	-0.112788	0.355216	0.349856	0.788082
RLTR13A2	ERVK	1162.84	-0.193571	0.142927	0.00405954	0.23524	117.157	-0.0409519	0.342037	0.839473	0.966835	117.157	-0.157799	0.335268	0.350266	0.788193
RLTR20A2B_MM	ERVK	187.762	-0.00256138	0.0340179	0.683265	0.99737	30.2179	0.0362717	0.341566	0.862225	0.971517	30.2179	-1.17215	0.734956	0.00417855	0.0678773
LTRIS4	ERV1	90.9667	-0.000431656	0.0341596	0.930716	0.99737	4.95807	0.123445	0.398622	0.49091	0.853617	4.95807	-0.0658295	0.33989	0.571647	0.90442
RLTR20B5_MM	ERVK	278.215	7.09961e-05	0.033631	0.987188	0.99737	56.5541	0.169155	0.355093	0.439909	0.828384	56.5541	-0.0401042	0.299185	0.804991	0.967797
MLT1E	ERVL-MaLR	226.966	-0.0097973	0.0355683	0.210153	0.99737	44.3454	-0.101966	0.339524	0.628237	0.907513	44.3454	-0.256867	0.375359	0.173484	0.59849
MER47A	TcMar-Tigger	40.455	0.0100073	0.0364287	0.0226492	0.52216	5.73259	0.180348	0.425589	0.326005	0.753195	5.73259	-0.207726	0.418515	0.108419	0.478584
L1M2c	L1	125.222	0.00240247	0.0341231	0.683163	0.99737	58.1369	-0.127899	0.314617	0.55524	0.880653	58.1369	-0.348662	0.379746	0.103527	0.466294
MLT1-int	ERVL-MaLR	145.845	0.00886191	0.0356455	0.145432	0.99737	28.5576	0.0337584	0.306616	0.876085	0.973408	28.5576	-0.0670748	0.282854	0.702266	0.945557
AmnSINE1	Deu	538.007	0.000408271	0.0329635	0.969234	0.99737	89.9127	0.0625671	0.304004	0.772557	0.951305	89.9127	-0.142814	0.294581	0.431167	0.837739
RLTR13A3	ERVK	302.09	-0.00349499	0.0338638	0.644731	0.99737	52.6592	-0.160968	0.350061	0.457469	0.837624	52.6592	-0.266633	0.377873	0.163878	0.582526
MER63D	hAT-Blackjack	262.738	0.00696492	0.0341738	0.443806	0.99737	38.5611	0.207024	0.323507	0.358737	0.779683	38.5611	-0.145409	0.295133	0.423941	0.835291
RLTR31_Mm	ERVK	85.8379	-0.00463542	0.0345354	0.389788	0.99737	26.2663	0.133606	0.312682	0.539868	0.87363	26.2663	-0.0386981	0.277665	0.821748	0.971197
MMVL30-int	ERV1	843.459	0.284526	0.105998	0.000262089	0.0240467	344.198	-0.228225	0.329699	0.311812	0.740775	344.198	-0.232542	0.320233	0.23011	0.675883
RLTR43C	ERVK	63.7182	0.00444163	0.0345257	0.39999	0.99737	6.65502	0.292767	0.517382	0.112752	0.477516	6.65502	0.0465313	0.340534	0.673616	0.938015
MERVK26-int	ERVK	320.261	0.00359701	0.0337257	0.662863	0.99737	65.5631	0.280835	0.334646	0.229759	0.66578	65.5631	-0.0560027	0.27411	0.747627	0.957037
RLTR31C_MM	ERVK	377.705	-0.00970673	0.0356484	0.196545	0.99737	90.6871	0.0655436	0.312689	0.761806	0.949212	90.6871	-0.291051	0.363098	0.149702	0.557111
L1ME2	L1	1261.33	0.00708967	0.0331666	0.544942	0.99737	322.17	0.106671	0.28822	0.620403	0.904121	322.17	-0.166193	0.28221	0.372228	0.80199
MLTR25C	ERVK	192.077	-0.00232142	0.0337116	0.762195	0.99737	44.1079	0.0669651	0.30681	0.757069	0.948108	44.1079	-0.205748	0.319413	0.273331	0.724015
RLTR6C_Mm	ERV1	10.8698	-0.000751954	0.0344335	0.73344	0.99737	3.15432	0.0784936	0.405193	0.594537	0.894979	3.15432	-0.0146353	0.339155	0.889275	0.978036
RLTR26D_MM	ERVK	190.024	0.00116518	0.0336301	0.880366	0.99737	41.1908	-0.12226	0.294804	0.569527	0.885901	41.1908	-0.110855	0.273831	0.537277	0.892621
RLTR13D3	ERVK	315.798	0.0289093	0.051852	0.0185874	0.487254	58.3587	-0.0161918	0.321653	0.936767	0.987143	58.3587	-0.343499	0.4135	0.0996392	0.459876
RMER17A-int	ERVK	83.8136	-0.00130137	0.03422	0.782374	0.99737	17.7881	0.0778147	0.328475	0.717048	0.937994	17.7881	-0.0811822	0.300389	0.62951	0.923414
RLTR11D	ERVK	291.037	-0.00194684	0.0335564	0.808169	0.99737	56.2804	0.168065	0.313145	0.448542	0.831194	56.2804	-0.20034	0.308955	0.291812	0.740502
BGLII_C	ERVK	21.5272	-0.00288291	0.034564	0.328705	0.99737	2.88143	0.0147538	0.40923	0.902342	0.980072	2.88143	-0.029587	0.348744	0.700261	0.944577
ETnERV3-int	ERVK	4014.32	-1.17948	0.30478	3.98353e-06	0.000548233	198.183	0.233944	0.352185	0.308094	0.737431	198.183	-0.0545685	0.288609	0.750393	0.957337
RLTR10B	ERVK	73.1761	0.00360336	0.0343727	0.491056	0.99737	40.6643	0.129639	0.312235	0.554149	0.879657	40.6643	0.0785277	0.280436	0.656864	0.932845
RLTR31M	ERVK	78.2508	0.00122894	0.0341847	0.803834	0.99737	19.2236	0.425931	0.500309	0.101486	0.452523	19.2236	0.11665	0.326265	0.471184	0.861325
RLTR17C_Mm	ERVK	71.3101	0.010659	0.0365341	0.0559765	0.79013	9.27632	-0.123414	0.384616	0.522891	0.86508	9.27632	-0.178984	0.373281	0.234517	0.680232
RLTR13F	ERVK	134.174	-0.00384427	0.0343153	0.513032	0.99737	11.0022	0.186959	0.416121	0.338277	0.761348	11.0022	0.00520852	0.325887	0.97002	0.994823
IAPEY3C_LTR	ERVK	93.0994	0.0100414	0.0361579	0.0933621	0.969732	20.0228	0.0531146	0.375688	0.774494	0.95158	20.0228	-0.0591242	0.330435	0.65542	0.932682
Charlie7	hAT-Charlie	257.25	0.000522365	0.0335831	0.9632	0.99737	102.235	-0.114715	0.32724	0.593175	0.894979	102.235	-0.0911869	0.294652	0.597827	0.913762
ERVB4_2-I_MM-int	ERVK	470.036	0.00918839	0.03489	0.313324	0.99737	63.15	0.374833	0.389394	0.134656	0.523524	63.15	0.00228076	0.282702	0.991078	0.998623
IAPLTR3	ERVK	43.9916	0.00182196	0.0343024	0.680029	0.99737	12.202	0.135185	0.39029	0.479363	0.847834	12.202	-0.0528268	0.327948	0.693351	0.942116
IAPLTR3-int	ERVK	624.888	0.0152905	0.0376973	0.136187	0.99737	68.2517	0.167129	0.392136	0.411817	0.813417	68.2517	0.0138814	0.317114	0.925949	0.986116
LTR104_Mam	Gypsy	36.6146	-0.000952287	0.0343492	0.785051	0.99737	8.77046	0.258092	0.475685	0.172578	0.587274	8.77046	0.0935861	0.347413	0.446775	0.846615
MER45B	hAT-Tip100	150.316	0.000161889	0.0339182	0.972448	0.99737	31.7359	0.182419	0.303682	0.407123	0.809895	31.7359	-0.164993	0.290337	0.369427	0.800541
L1MCb	L1	144.342	0.00181745	0.0339722	0.787767	0.99737	25.9893	0.321278	0.364113	0.180816	0.599924	25.9893	-0.0377162	0.282321	0.82508	0.971197
MTB-int	ERVL-MaLR	987.547	-0.00636853	0.0341261	0.467676	0.99737	183.681	0.101351	0.38081			183.681	0.0744523	0.329178
RLTR34D_MM	ERVK	101.187	0.00209594	0.0341382	0.709563	0.99737	28.2592	0.195645	0.372375	0.370953	0.787422	28.2592	-0.0354874	0.304738	0.820742	0.971031
L1MEb	L1	139.124	-0.00743375	0.0351229	0.22785	0.99737	50.9607	0.000248814	0.317274	0.999326	0.999694	50.9607	-0.218036	0.338154	0.244188	0.69165
Ricksha_0	MULE-MuDR	29.6344	0.00393256	0.0347377	0.158122	0.99737	5.70957	-0.0205391	0.384335	0.89898	0.979417	5.70957	-0.135352	0.366503	0.258715	0.706463
Charlie1b	hAT-Charlie	701.505	-0.00864469	0.0347559	0.334458	0.99737	104.558	0.0821259	0.303616	0.707198	0.935532	104.558	-0.0770446	0.278731	0.662426	0.935667
LTRIS3	ERV1	248.124	0.00893717	0.0349611	0.30942	0.99737	32.5848	-0.264869	0.408186	0.237431	0.674902	32.5848	-0.267838	0.401254	0.144458	0.548191
RLTR11B	ERVK	694.322	-0.0116901	0.0360799	0.197368	0.99737	147.535	0.0745806	0.296541	0.728989	0.942246	147.535	-0.0551188	0.271134	0.754114	0.959022
MER72B	ERV1	8.2648	0.00172316	0.0345198	0.385057	0.99737	0.815175	-0.0820981	0.436401	0.246285		0.815175	-0.00674123	0.352696	0.847467
MLT1E3-int		3.19158	-0.00113373	0.0345158	0.379866	0.99737
HERVL40-int	ERVL	94.8001	0.00258912	0.0341292	0.659921	0.99737	14.375	0.363194	0.452982	0.141267	0.535759	14.375	-0.0282201	0.308679	0.853853	0.974031
LTR40a	ERVL	200.287	-0.00188141	0.0338912	0.780466	0.99737	39.447	0.0993286	0.339042	0.642949	0.913174	39.447	-0.131884	0.319165	0.435153	0.840571
LTR68	ERV1	18.7916	0.00190718	0.0344764	0.494888	0.99737	3.60786	-0.0641449	0.390679	0.700576	0.932124	3.60786	-0.218525	0.425871	0.0970058	0.454922
MER57E2	ERV1	3.5094	0.000777418	0.0345045	0.524616	0.99737	1.20735	-0.0244635	0.415444	0.803456		1.20735	-0.0565782	0.356805	0.418291
L1MDb	L1	180.369	0.00663061	0.0345211	0.388764	0.99737	27.6005	0.220267	0.333274	0.333382	0.757474	27.6005	0.0852137	0.284107	0.630962	0.924149
MLT2C1	ERVL	241.819	0.0015647	0.0337758	0.827552	0.99737	39.9027	0.211498	0.328204	0.349256	0.77089	39.9027	-0.201832	0.317588	0.280736	0.729243
RLTR44C	ERVK	98.9016	0.006545	0.0349479	0.247458	0.99737	23.153	-0.124595	0.345978	0.553698	0.879657	23.153	-0.387852	0.469795	0.0746279	0.397154
MLT1E1	ERVL-MaLR	154.641	0.0114501	0.036377	0.134273	0.99737	62.5608	-0.0539191	0.340697	0.790788	0.956093	62.5608	-0.119634	0.319046	0.470411	0.861196
MLTR31D_MM	ERVK	177.139	-0.00719429	0.0349258	0.284908	0.99737	36.0755	0.117162	0.324546	0.590421	0.893694	36.0755	-0.158642	0.314748	0.370396	0.801167
RLTR26C_MM	ERVK	138.205	0.00607232	0.0345116	0.391859	0.99737	28.443	0.237358	0.400763	0.283096	0.716591	28.443	0.0394408	0.310486	0.799151	0.967442
BGLII_Mus	ERVK	149.238	-4.95316e-05	0.0342235	0.934538	0.99737	46.5015	0.028692	0.323066	0.894363	0.977915	46.5015	-0.482846	0.507557	0.0453653	0.305402
MER58A	hAT-Charlie	2901.17	-0.00391155	0.0319226	0.697447	0.99737	373.216	0.0399436	0.29767	0.854823	0.970131	373.216	-0.129104	0.286004	0.474845	0.862887
RLTR6_Mm	ERV1	260.895	-0.00825569	0.0352008	0.2416	0.99737	93.8499	0.310523	0.261457	0.143002	0.539215	93.8499	-0.0521067	0.227486	0.765216	0.961659
MER135	DNA	45.2254	-0.00267321	0.0344142	0.514569	0.99737	11.3403	0.0150712	0.365681	0.938294	0.987347	11.3403	-0.142598	0.353882	0.320953	0.764595
MLT1H	ERVL-MaLR	741.628	0.00774219	0.0336736	0.487159	0.99737	142.937	0.315973	0.321241	0.177235	0.594857	142.937	-0.0327448	0.259947	0.852469	0.974031
RLTR30C_MM	ERV1	30.1302	0.00323165	0.034592	0.309531	0.99737	3.83594	0.0513072	0.398554	0.734863	0.943059	3.83594	0.0401785	0.340463	0.708592	0.946931
RLTR12C	ERVK	368.921	0.00393753	0.033928	0.609107	0.99737	54.7693	-0.0332219	0.312379	0.873726	0.972862	54.7693	-0.453291	0.451819	0.0542012	0.337088
MER94	hAT-Blackjack	152.523	0.00499105	0.0341568	0.574817	0.99737	23.8878	-0.0485706	0.370796	0.791242	0.956093	23.8878	-0.159633	0.363524	0.270769	0.721221
ERVB3_1-I_MM-int	ERVK	243.88	0.00353488	0.0342102	0.568895	0.99737	35.5845	0.0839876	0.357478	0.682618	0.92659	35.5845	-0.123254	0.332827	0.428527	0.837462
MTE2a-int	ERVL-MaLR	281.354	-0.00807608	0.034566	0.369098	0.99737	39.1204	0.0402142	0.331962	0.849499	0.967956	39.1204	-0.162955	0.329457	0.346719	0.785366
L1M	L1	168.742	0.00270252	0.0337994	0.719063	0.99737	34.8639	-0.135432	0.315947	0.534255	0.87005	34.8639	-0.0176526	0.27589	0.91764	0.9851
RLTR13D2	ERVK	185.498	0.00507973	0.0344413	0.427348	0.99737	25.3743	0.138124	0.343919	0.523238	0.86524	25.3743	-0.241814	0.370423	0.185859	0.617841
LTR80A	ERVL	22.5478	-0.00156246	0.0344315	0.552556	0.99737	3.35284	-0.0661166	0.416781	0.565649	0.884591	3.35284	-0.0660124	0.356179	0.380658	0.806972
MADE2	TcMar-Mariner	70.6221	-0.00200046	0.0341663	0.70744	0.99737	9.02548	0.450749	0.548182	0.0881177	0.420397	9.02548	0.105349	0.332034	0.487748	0.870805
BLACKJACK	hAT-Blackjack	152.557	0.0046418	0.0343724	0.468575	0.99737	29.0778	-0.0507395	0.361369	0.792223	0.956477	29.0778	-0.104701	0.330918	0.485584	0.87015
Arthur1C	hAT-Tip100	32.6681	-0.000130965	0.0343003	0.971156	0.99737	7.01744	-0.0203457	0.383102	0.901417	0.979969	7.01744	-0.109288	0.352185	0.381383	0.807141
LTR40c	ERVL	230.533	0.00179038	0.0334289	0.834936	0.99737	35.3748	0.0872487	0.351292	0.67482	0.924931	35.3748	-0.228843	0.379385	0.193496	0.631515
ZP3AR	Satellite	1603.17	-0.00972032	0.034149	0.381165	0.99737	707.256	0.023361	0.394534			707.256	-0.0391889	0.340031
Charlie8	hAT-Charlie	437.686	0.00707237	0.034251	0.428911	0.99737	42.5982	0.0436807	0.318587	0.839281	0.966835	42.5982	-0.253201	0.356315	0.188844	0.6221
RLTR13C3	ERVK	268.829	-0.0130791	0.0367531	0.157179	0.99737	53.4948	0.0224856	0.355414	0.912368	0.982567	53.4948	-0.0382928	0.31416	0.796987	0.9666
LTRIS_Mm	ERV1	277.877	-0.00864546	0.0355534	0.16029	0.99737	53.0064	1.25	0.376649	9.013e-05	0.0029543	53.0064	0.488242	0.362408	0.040603	0.286524
MER112	hAT-Charlie	162.174	0.00838696	0.0351901	0.251025	0.99737	28.3712	0.0470777	0.327973	0.82203	0.963476	28.3712	0.0365257	0.29359	0.828747	0.971197
RMER30	hAT-Charlie	2106.26	-0.0287899	0.0464183	0.0758432	0.879263	281.776	0.116487	0.292356	0.590677	0.893767	281.776	-0.167329	0.285466	0.367563	0.799542
Charlie29a	hAT-Charlie	130.599	0.000272154	0.0337749	0.969614	0.99737	34.2919	-0.236572	0.345247	0.30041	0.731326	34.2919	-0.774797	0.523207	0.0112557	0.128674
MER90a	ERV1	181.444	-0.00309392	0.0338496	0.674835	0.99737	34.6257	0.151409	0.348936	0.485065	0.849995	34.6257	-0.062028	0.301987	0.702848	0.945835
L1MCc	L1	223.959	-0.00713728	0.0344687	0.388869	0.99737	40.4905	0.168908	0.340067	0.444912	0.830206	40.4905	-0.435415	0.470768	0.0606584	0.358022
MLT1F1	ERVL-MaLR	749.861	0.00854036	0.0343793	0.418966	0.99737	135.199	-0.0539948	0.299269	0.798708	0.958133	135.199	-0.123795	0.285321	0.492264	0.873171
MER67A	ERV1	41.8573	-0.000992661	0.0342643	0.805155	0.99737	5.2615	0.342354	0.536321	0.105626	0.462527	5.2615	-0.00777037	0.333113	0.9469	0.989757
LTR85a	Gypsy?	28.5747	-0.00189879	0.0344338	0.558166	0.99737	7.69714	0.139054	0.39833	0.455606	0.835659	7.69714	-0.0266001	0.328419	0.833749	0.971197
L1ME4c	L1	314.925	-0.00275008	0.0338646	0.699212	0.99737	79.4672	0.16318	0.322532	0.462513	0.840488	79.4672	-0.143239	0.29982	0.425883	0.835999
LTR31	ERV1	100.396	0.00694993	0.0349498	0.268546	0.99737	28.7181	0.189779	0.353032	0.394086	0.801647	28.7181	-0.0460011	0.295709	0.781739	0.964864
LTR103_Mam	ERV1?	5.76249	-0.00067926	0.0344833	0.719773	0.99737	4.38104	-0.0831382	0.402798	0.589049	0.893119	4.38104	-0.184626	0.405288	0.112173	0.486705
RLTR13D3A1	ERVK	691.819	-0.0104141	0.0348462	0.325188	0.99737	109.147	-0.0585676	0.248459	0.770739	0.950887	109.147	-0.0896349	0.236136	0.613621	0.919309
SRV_MM-int	ERVK	168.728	-0.0035637	0.034306	0.525035	0.99737	21.5915	-0.0936178	0.357649	0.644671	0.913704	21.5915	-0.0381474	0.309576	0.803534	0.967746
L1MEh	L1	42.6416	0.000759389	0.0343279	0.839931	0.99737	7.60668	0.216804	0.449608	0.23104	0.666535	7.60668	0.00441677	0.333331	0.970901	0.99511
RLTR44E	ERVK	133.771	0.00669482	0.0350502	0.211603	0.99737	16.2599	-0.00561672	0.346303	0.975803	0.994947	16.2599	-0.0819997	0.316299	0.60044	0.914536
MER92B	ERV1	82.7493	-0.0139184	0.038241	0.0227645	0.52216	13.8316	0.101633	0.358316	0.621568	0.904523	13.8316	-0.0557203	0.314337	0.712895	0.947579
Arthur1A	hAT-Tip100	34.1373	-0.00273024	0.0344807	0.448901	0.99737	6.68268	-0.143256	0.422099	0.365243	0.78431	6.68268	-0.0476375	0.3392	0.670102	0.936813
RLTR13B3	ERVK	416.491	0.00878904	0.0343076	0.401694	0.99737	89.3305	0.203812	0.37766	0.35562	0.77635	89.3305	0.141464	0.327706	0.406854	0.825578
MLT2B3	ERVL	387.467	0.0134183	0.0369806	0.146285	0.99737	94.2801	0.238976	0.310985	0.291714	0.72502	94.2801	-0.564731	0.409162	0.0256875	0.218514
MLT1I	ERVL-MaLR	438.606	0.00620099	0.034228	0.434782	0.99737	106.749	-0.111124	0.321202	0.604871	0.898482	106.749	-0.453484	0.45027	0.0542819	0.337367
Tigger13a	TcMar-Tigger	384.824	-0.000416338	0.0334842	0.957805	0.99737	88.8668	0.0323333	0.267586	0.878816	0.97434	88.8668	-0.336105	0.312582	0.105787	0.472517
MamRep1151	LTR?	63.4415	-0.00368685	0.0343769	0.491413	0.99737	10.8736	0.0316167	0.354935	0.876154	0.973408	10.8736	-0.0634052	0.319451	0.668697	0.936711
Charlie21a	hAT-Charlie	54.1566	-0.00248266	0.0342757	0.631483	0.99737	4.83894	0.0571743	0.381314	0.750464	0.947707	4.83894	-0.0419373	0.332097	0.734784	0.953008
MLT1H1	ERVL-MaLR	263.12	0.0166619	0.0392353	0.0703714	0.873991	55.8863	0.0420326	0.313527	0.845449	0.967519	55.8863	-0.169206	0.313597	0.350529	0.78848
Charlie2a	hAT-Charlie	183.386	-0.00841249	0.0354751	0.167034	0.99737	29.5923	-0.0301846	0.336585	0.88384	0.975146	29.5923	-0.124712	0.319983	0.452549	0.851165
MLT2B2	ERVL	294.808	-0.00238364	0.0335664	0.732899	0.99737	47.807	-0.0188678	0.346218	0.925118	0.984716	47.807	-0.171855	0.347814	0.301096	0.748446
LTR33A	ERVL	133.124	0.0140088	0.0380484	0.0527826	0.777469	20.3101	-0.0159956	0.364936	0.929826	0.986033	20.3101	-0.0776014	0.32831	0.585982	0.909
LTR33	ERVL	356.37	0.00205561	0.0334966	0.807356	0.99737	85.2735	0.325588	0.362947	0.179115	0.598007	85.2735	-0.106903	0.290122	0.544882	0.895055
RMER16_Mm	ERVK	193.704	-0.0108631	0.0360302	0.174262	0.99737	65.4622	-0.0824641	0.265746	0.6903	0.929121	65.4622	-0.292419	0.294769	0.143679	0.546367
LTR48B	ERV1	88.4346	-0.00314423	0.0342138	0.588766	0.99737	12.3105	0.0898595	0.364651	0.654607	0.916951	12.3105	0.0595686	0.318057	0.694096	0.942216
MER57E1	ERV1	76.3063	-0.00669392	0.0350147	0.225328	0.99737	7.68511	0.103545	0.379531	0.59614	0.895297	7.68511	0.140312	0.349333	0.364872	0.798528
MLT1H2	ERVL-MaLR	393.195	-0.000824996	0.0332931	0.924625	0.99737	78.0821	-0.107586	0.266869	0.60652	0.899411	78.0821	-0.143632	0.257495	0.433733	0.839133
IAPLTR2a	ERVK	236.612	0.00301438	0.0336906	0.741832	0.99737	54.2305	0.491941	0.491685	0.0750344	0.38664	54.2305	0.179368	0.336793	0.311734	0.757872
MER45R	hAT-Tip100	102.282	-0.000188619	0.0340583	0.975827	0.99737	11.0895	0.172482	0.387565	0.399635	0.804774	11.0895	0.0911449	0.325516	0.545889	0.895985
MER102c	hAT-Charlie	205.535	-0.00146463	0.0336541	0.846841	0.99737	31.3964	0.0406243	0.319117	0.849345	0.967956	31.3964	-0.360188	0.417761	0.0944727	0.449298
Eulor10		10.246	-0.00276074	0.034613	0.189596	0.99737
MLTR31E_MM	ERVK	51.3127	0.00290459	0.0343879	0.521586	0.99737	10.5427	-0.0825093	0.359036	0.679579	0.925947	10.5427	-0.300077	0.449749	0.0942249	0.448703
Charlie10	hAT-Charlie	124.961	0.000239416	0.0339288	0.971175	0.99737	21.3481	0.0489443	0.32248	0.819217	0.962522	21.3481	-0.368584	0.435179	0.0853947	0.425776
MLT2B5	ERVL	103.371	0.00134683	0.0340084	0.818425	0.99737	19.5406	0.0754497	0.342616	0.720063	0.939646	19.5406	-0.270491	0.400149	0.145034	0.54958
RLTR41C	ERV1	81.7108	-0.0023543	0.0342473	0.653417	0.99737	10.1136	0.0910406	0.3763	0.63247	0.908848	10.1136	-0.026567	0.321292	0.849425	0.97371
Arthur1B	hAT-Tip100	139.635	-0.00496942	0.0344908	0.410354	0.99737	33.6016	0.114173	0.338559	0.595074	0.894979	33.6016	-0.132226	0.317337	0.436288	0.840811
IAPA_MM-int	ERVK	30.9296	-0.00138216	0.034335	0.719318	0.99737	7.76897	0.109304	0.42445	0.398774	0.803946	7.76897	0.0644627	0.352046	0.476123	0.863769
L1ME3C	L1	119.218	0.00513985	0.0344569	0.412953	0.99737	30.1577	-0.0034067	0.340903	0.983705	0.996325	30.1577	-0.173652	0.34345	0.306067	0.752912
MLT2E	ERVL	40.7314	-0.00252928	0.0344732	0.463097	0.99737	29.3682	1.42236	0.608769	0.0012464	0.0238636	29.3682	1.68589	0.599804	0.000262928	0.00817894
IAPEY5_LTR	ERVK	8.88273	0.00190983	0.0345615	0.186578	0.99737	7.19771	-0.136032	0.410505	0.425871	0.820851	7.19771	-0.25378	0.462532	0.0528654	0.332403
IAPEY5_I-int	ERVK	7.35401	0.00207239	0.0345749	0.141301	0.99737	7.84017	-0.00702872	0.383351	0.964503	0.992482	7.84017	-0.0817151	0.344046	0.494524	0.87361
RMER16B2	ERVK	246.149	-0.0016537	0.0334543	0.843742	0.99737	302.952	0.236339	0.347987	0.305805	0.735802	302.952	-0.0456352	0.284782	0.788382	0.965582
MER20B	hAT-Charlie	388.688	0.00277288	0.033517	0.747722	0.99737	76.0084	-0.0711153	0.333973	0.733505	0.943059	76.0084	-0.16451	0.327613	0.347595	0.785844
MER103C	hAT-Charlie	376.285	-0.0038279	0.0337616	0.643806	0.99737	69.5186	0.102601	0.337568	0.630842	0.908479	69.5186	-0.0051329	0.294479	0.973017	0.995996
LTR67B	ERVL	208.898	0.00264965	0.0337945	0.726818	0.99737	40.8668	0.0152282	0.333417	0.944174	0.98936	40.8668	-0.300393	0.409456	0.126237	0.511518
MER87	ERV1	11.474	0.00148593	0.0345099	0.42708	0.99737	1.25458	0.113619	0.43325	0.295701		1.25458	-0.0287955	0.352193	0.625636
Chap1_Mam	hAT-Charlie	58.5422	0.00156934	0.0341945	0.754056	0.99737	11.9726	0.15621	0.383242	0.445985	0.830435	11.9726	0.116825	0.333998	0.446416	0.846587
MER89-int	ERV1	9.56943	0.00163765	0.0344995	0.458551	0.99737	1.74573	0.00578915	0.411179	0.960317	0.991919	1.74573	-0.0235769	0.348916	0.755908
Charlie24	hAT-Charlie	142.213	-0.00410812	0.034216	0.526036	0.99737	22.8798	0.0649014	0.313188	0.764356	0.949549	22.8798	-0.148018	0.306665	0.407193	0.825624
L1ME3F	L1	150.568	-0.00224222	0.0341661	0.680427	0.99737	68.2458	0.0665637	0.300229	0.756888	0.948108	68.2458	-0.125161	0.286553	0.488164	0.870954
Charlie17	hAT-Charlie	86.1208	0.00716372	0.0351469	0.198535	0.99737	11.6877	0.0552515	0.351376	0.787179	0.954517	11.6877	-0.421097	0.567979	0.0531192	0.33377
MER63A	hAT-Blackjack	135.282	0.00878193	0.0356108	0.150318	0.99737	33.0522	0.138318	0.348883	0.520118	0.864467	33.0522	-0.00119488	0.297598	0.992613	0.998623
MurERV4_19-int	ERVK	477.472	-0.000802554	0.0332917	0.933115	0.99737	141.837	0.167605	0.318317	0.452501	0.833544	141.837	-0.141572	0.294729	0.435328	0.840571
MER70A	ERVL	81.8209	0.00328389	0.0343776	0.505266	0.99737	9.80246	0.520169	0.702244	0.0530358	0.314122	9.80246	0.235149	0.420406	0.127949	0.514881
RLTR31_Mur	ERVK	183.736	-0.00934337	0.0359049	0.103829	0.99737	32.5982	-0.0188497	0.343693	0.923864	0.984679	32.5982	-0.0751825	0.312622	0.63215	0.924632
MamTip2	hAT-Tip100	257.701	-0.00494754	0.0339179	0.550539	0.99737	42.2702	-0.234075	0.345937	0.303254	0.733617	42.2702	-0.215239	0.326715	0.255999	0.705512
MER77	ERVL	400.639	0.00627341	0.0339351	0.498712	0.99737	75.5068	0.301999	0.381866	0.207908	0.639758	75.5068	0.0326845	0.290074	0.847951	0.973514
LTR16B	ERVL	62.7047	0.00584816	0.0349102	0.224717	0.99737	11.8482	0.158732	0.372053	0.449611	0.832101	11.8482	0.0417093	0.311218	0.785399	0.965504
RLTR31A_Mm	ERVK	79.4938	-0.00113232	0.0341653	0.832761	0.99737	16.1221	-0.0791068	0.358648	0.689351	0.928866	16.1221	-0.314727	0.461033	0.0858536	0.426957
MER130	Unknown	32.9243	-0.00895649	0.0360271	0.0266369	0.553344	4.10519	-0.038386	0.390639	0.812283	0.959969	4.10519	-0.236854	0.451019	0.062996	0.365565
RLTR20A	ERVK	144.78	-0.00713754	0.0349372	0.277167	0.99737	18.196	0.17909	0.369496	0.407767	0.810437	18.196	-0.0809275	0.314716	0.604796	0.916059
MLT1G1	ERVL-MaLR	2021.23	-0.0233328	0.0442959	0.0464945	0.710978	164.06	0.00487151	0.3047	0.984322	0.996381	164.06	-0.0760973	0.282241	0.662431	0.935667
LTR102_Mam	ERVL	43.1311	-0.000612466	0.0343316	0.862931	0.99737	14.0406	-0.122108	0.397416	0.493415	0.853948	14.0406	-0.155524	0.370821	0.240274	0.68616
LTR53B	ERVL	8.78709	0.000548031	0.0344475	0.806365	0.99737	2.4724	-0.0626192	0.414171	0.610186	0.900779	2.4724	-0.0767532	0.358617	0.341314
Charlie7a	hAT-Charlie	26.363	-0.00212423	0.0344554	0.51262	0.99737	4.53751	0.067803	0.401152	0.656344	0.917722	4.53751	0.0258569	0.338552	0.812973	0.969554
MER21-int	ERVL	47.5578	-0.000998612	0.0342661	0.813861	0.99737	19.921	-0.151751	0.341687	0.481267	0.848512	19.921	-0.465995	0.498533	0.0504153	0.32328
MER5C1	hAT-Charlie	51.8152	-0.00235269	0.0342767	0.629903	0.99737	6.43405	-0.141093	0.402017	0.433824	0.825132	6.43405	-0.0659356	0.332372	0.61781	0.92015
MTEb-int	ERVL-MaLR	255.133	0.0034357	0.0339947	0.627933	0.99737	91.5358	0.205488	0.333979	0.363566	0.782635	91.5358	-0.0897401	0.288351	0.607273	0.916873
LTRIS6	ERV1	12.36	0.00381681	0.0347622	0.0769406	0.879263	4.7647	0.413788	0.63412	0.0599528	0.339891	4.7647	0.0526485	0.339275	0.654264	0.932628
RLTR24	ERV1	586.245	-0.0120215	0.0362568	0.1849	0.99737	110.648	0.209132	0.303133	0.349519	0.77089	110.648	-0.189858	0.289794	0.314881	0.760127
LTRIS5	ERV1	44.461	-0.000779506	0.0343044	0.816796	0.99737	5.86576	0.108764	0.39088	0.550999	0.878633	5.86576	0.00956048	0.326726	0.943051	0.988121
MER115	hAT-Tip100	134.026	0.0144805	0.0383366	0.0438262	0.699314	29.8262	0.137469	0.333016	0.532326	0.869592	29.8262	-0.0807638	0.296019	0.638089	0.926926
ORSL-2b	hAT-Tip100	46.7549	0.00541481	0.0348667	0.212786	0.99737	14.1593	-0.0302561	0.357402	0.874992	0.97314	14.1593	-0.00597467	0.312393	0.967477	0.994028
MLT1G	ERVL-MaLR	286.03	-0.00536309	0.0340251	0.523792	0.99737	50.9404	0.0924435	0.334098	0.665275	0.921086	50.9404	-0.21731	0.350539	0.23659	0.682346
ERVL-int	ERVL	173.61	0.0043499	0.0341432	0.535783	0.99737	31.4966	0.164655	0.393912	0.413293	0.814196	31.4966	0.0645611	0.324489	0.657799	0.932911
LTR86A2	ERVL	13.4914	-0.00113907	0.034436	0.667289	0.99737	4.02417	-0.038087	0.396107	0.798821	0.958133	4.02417	-0.0760625	0.348249	0.487847	0.87088
MER127	TcMar-Tigger	59.4781	0.00329456	0.0344125	0.478716	0.99737	26.162	-0.151877	0.357089	0.474655	0.84545	26.162	-0.992711	0.700335	0.00733357	0.0982266
LTR33A_	ERVL	181.119	0.00207555	0.0340244	0.738257	0.99737	23.7064	0.0287085	0.343333	0.890582	0.976329	23.7064	-0.14631	0.334339	0.371613	0.801911
MER94B	hAT-Blackjack	16.4995	0.00512603	0.0349635	0.0746279	0.879263	1.49379	-0.0165688	0.410984	0.885962		1.49379	-0.00143875	0.346839	0.984648
MER58C	hAT-Charlie	224.799	-0.00679723	0.0345869	0.357809	0.99737	31.4128	0.292629	0.410253	0.213402	0.645983	31.4128	-0.041249	0.30553	0.79354	0.966201
Charlie23a	hAT-Charlie	82.8346	-0.00425012	0.0345227	0.389598	0.99737	17.4803	-0.0262295	0.357339	0.890286	0.976261	17.4803	-0.286517	0.44153	0.107077	0.475953
MER117	hAT-Charlie	285.715	-0.00566496	0.0341055	0.492757	0.99737	39.1345	-0.143728	0.332187	0.507928	0.861325	39.1345	-0.187185	0.323416	0.307489	0.75399
Helitron2Na_Mam	Helitron?	30.8023	0.00117234	0.0343444	0.750899	0.99737	6.50162	1.36222	0.998853	0.00806153	0.0934302	6.50162	0.511065	0.815819	0.0281794	0.231125
UCON28c		1.78342	-0.00084392	0.0345171	0.332256	0.99737
MER45A	hAT-Tip100	180.207	-0.00104513	0.0336857	0.885986	0.99737	26.7163	0.139227	0.339355	0.522158	0.864801	26.7163	-0.110976	0.307229	0.516218	0.885003
RLTR30D_MM	ERV1	162.848	0.0043468	0.0341707	0.527052	0.99737	20.7694	0.102479	0.310373	0.635199	0.910507	20.7694	-0.189519	0.314636	0.306829	0.752912
Charlie15a	hAT-Charlie	76.1109	-0.00373392	0.0343085	0.504432	0.99737	10.1923	1.83705	0.712591	0.000594463	0.0134158	10.1923	0.521451	0.683518	0.0377402	0.273714
L4_A_Mam	RTE-X	296.282	-0.00377556	0.0338156	0.660102	0.99737	38.1576	0.10767	0.327717	0.620727	0.904207	38.1576	-0.104026	0.30135	0.542935	0.895009
L1PB4	L1	64.8502	-0.00472103	0.0346691	0.312808	0.99737	19.3871	0.106451	0.355476	0.61053	0.900779	19.3871	-0.125356	0.329158	0.436866	0.84098
X6A_LINE	CR1	33.6759	0.00179767	0.0343978	0.605281	0.99737	3.16765	0.106634	0.402775	0.519505	0.864467	3.16765	-0.132625	0.370496	0.239194	0.684894
Charlie18a	hAT-Charlie	134.345	0.00354334	0.0342039	0.566641	0.99737	17.5663	-0.117072	0.357496	0.57283	0.886886	17.5663	-0.229704	0.377384	0.198799	0.638943
LTR33B	ERVL	39.0234	0.00225204	0.0343392	0.606877	0.99737	8.62668	0.204741	0.435501	0.273205	0.709215	8.62668	0.111687	0.350809	0.388198	0.812324
MER81	hAT-Blackjack	184.743	0.00739236	0.0349835	0.276599	0.99737	26.6905	0.619785	0.46084	0.0351692	0.246663	26.6905	0.0579189	0.288195	0.738485	0.953477
RLTR44D	ERVK	26.8839	-0.000670992	0.0344082	0.807242	0.99737	3.44471	0.0653816	0.393637	0.692735	0.929626	3.44471	-0.0669845	0.34302	0.568953	0.902868
LTR81	Gypsy	11.2215	-0.000743399	0.0344418	0.755449	0.99737	1.97678	0.0742829	0.421499	0.497725	0.855697	1.97678	-0.00488923	0.349001	0.945067
HERV16-int	ERVL	104.409	-0.00117971	0.0340373	0.83948	0.99737	14.2881	0.328476	0.469187	0.155109	0.559483	14.2881	-0.0199172	0.316427	0.891583	0.978618
X6B_LINE	CR1	48.0484	-0.00065586	0.0342761	0.846548	0.99737	8.08174	-0.100428	0.381214	0.592706	0.894772	8.08174	-0.0712325	0.32985	0.603701	0.915401
MamRep4096	hAT?	35.6656	0.000470331	0.0343038	0.892211	0.99737	5.46354	0.11251	0.399555	0.520007	0.864467	5.46354	0.208434	0.405799	0.139992	0.538929
MER70B	ERVL	82.7441	0.00345972	0.0343681	0.50125	0.99737	11.628	0.557904	0.720438	0.0483899	0.29884	11.628	0.329205	0.509574	0.0661939	0.375354
MER67B	ERV1	147.123	0.00799222	0.035252	0.214729	0.99737	14.1832	-0.0510402	0.354567	0.795924	0.957401	14.1832	-0.0892192	0.322106	0.559334	0.899464
Tigger19a	TcMar-Tigger	479.476	-0.0053934	0.0334068	0.569829	0.99737	74.6341	0.0307102	0.284469	0.886819	0.975449	74.6341	-0.109465	0.271581	0.544461	0.895055
ERVB5_2-LTR_MM	ERVK	134.615	0.000341182	0.0338926	0.953688	0.99737	14.6753	0.206765	0.397038	0.331939	0.756322	14.6753	-0.157601	0.352772	0.310754	0.756982
MamRep434	TcMar-Tigger	159.303	-0.00306044	0.0339938	0.654386	0.99737	33.4066	-0.0559967	0.33438	0.787187	0.954517	33.4066	-0.0667287	0.301151	0.686178	0.941347
Charlie16a	hAT-Charlie	109.49	-0.00872121	0.0355625	0.161332	0.99737	12.9627	0.0626008	0.333761	0.769034	0.950682	12.9627	-0.0511111	0.299399	0.758444	0.960248
LTR41	ERVL	257.686	0.007007	0.0344424	0.401946	0.99737	68.5821	-0.173462	0.344285	0.429806	0.822942	68.5821	-0.200668	0.333788	0.275042	0.725043
RLTR20A1	ERVK	44.1276	0.00207112	0.0343636	0.610221	0.99737	5.71449	0.0352854	0.393823	0.822523	0.963547	5.71449	-0.0639952	0.345684	0.539854	0.893783
MLT1D-int	ERVL-MaLR	86.5019	-0.00423787	0.0344267	0.462202	0.99737	18.3093	0.217595	0.407517	0.300412	0.731326	18.3093	0.152773	0.347557	0.334468	0.778086
MER113	hAT-Charlie	308.713	-0.00443835	0.0336027	0.61969	0.99737	44.2005	-0.00859664	0.32662	0.964932	0.992557	44.2005	-0.174031	0.329842	0.322543	0.766584
LTR53	ERVL	132.122	0.67498	0.181895	7.88568e-06	0.000964682	15.4486	-0.114502	0.339026	0.588873	0.893119	15.4486	-0.0180608	0.293235	0.910845	0.983686
ERVB4_3-I_MM-int	ERVK	57.0375	-3.72911e-05	0.0342637	0.993747	0.99737	10.6183	-0.026809	0.373664	0.881596	0.974833	10.6183	-0.0441011	0.327565	0.740035	0.95407
HAL1b	L1	238.849	-0.0136721	0.0375806	0.0856874	0.934078	40.9053	-0.0417896	0.311924	0.842693	0.967211	40.9053	-0.319368	0.379496	0.12349	0.507139
L1ME5	L1	31.587	0.00282202	0.0344945	0.433109	0.99737	8.36583	0.248312	0.45912	0.205563	0.637557	8.36583	0.0176238	0.330093	0.889413	0.978036
CR1_Mam	CR1	159.845	0.0016066	0.0340344	0.787984	0.99737	27.1379	-0.029344	0.339867	0.883785	0.975146	27.1379	-0.198933	0.353737	0.255344	0.704573
MER102b	hAT-Charlie	430.441	0.0171236	0.0384374	0.135556	0.99737	55.1634	-0.07726	0.308289	0.717279	0.937994	55.1634	-0.394189	0.403527	0.0773531	0.403613
Tigger15a	TcMar-Tigger	469.014	0.00749859	0.0339511	0.465741	0.99737	61.253	-0.0519026	0.287818	0.805552	0.958133	61.253	-0.206692	0.298388	0.277691	0.726416
Charlie14a	hAT-Charlie	21.5564	-0.000599134	0.0343638	0.851079	0.99737	1.06532	-0.00196539	0.418708	0.978127		1.06532	-0.0318709	0.354467	0.600567
L1MEa	L1	96.3792	0.00486318	0.0343471	0.463801	0.99737	18.1372	0.0420565	0.319228	0.845019	0.967412	18.1372	-0.490735	0.508024	0.0442668	0.300646
LTR83	ERVL	39.8655	0.000527346	0.0343804	0.921881	0.99737	9.47075	0.361174	0.491099	0.131632	0.518685	9.47075	-0.0121839	0.31788	0.931323	0.987321
FAM	Alu	70.7046	-0.000291828	0.0340435	0.954078	0.99737	10.4873	0.266608	0.421491	0.233669	0.669878	10.4873	-0.205725	0.381004	0.204061	0.645877
LTR88a	Gypsy?	7.26355	0.00191113	0.0345392	0.322253	0.99737	2.79259	0.0359711	0.402066	0.799509	0.958133	2.79259	-0.0402665	0.345266	0.671756	0.936944
MMERVK10D3_LTR	ERVK	27.1163	0.0015665	0.0343773	0.660454	0.99737	11.7814	0.0281279	0.348071	0.889778	0.976086	11.7814	0.058751	0.311189	0.706459	0.94617
LTR16A2	ERVL	71.2236	0.00197395	0.0342521	0.675518	0.99737	12.3249	0.391948	0.51853	0.109952	0.471914	12.3249	-0.029477	0.320462	0.834361	0.971197
MamGypLTR3a	Gypsy	36.7887	-0.00170259	0.0344011	0.618597	0.99737	6.93292	0.182699	0.414453	0.343686	0.765856	6.93292	-0.00881987	0.326443	0.945379	0.989098
LTR16B1	ERVL	59.3478	0.000479948	0.0343147	0.899346	0.99737	18.6912	0.168253	0.396295	0.400562	0.805088	18.6912	-0.00376521	0.320028	0.976565	0.997107
RLTR13D3A	ERVK	164.719	-0.00376988	0.0338182	0.596281	0.99737	42.2061	0.569498	0.457208	0.0470722	0.294318	42.2061	0.114757	0.298759	0.51666	0.88522
FordPrefect	hAT-Tip100	134197	0.00350461	0.0346446	0.250521	0.99737	5896.02	0.0774026	0.402481	0.624683	0.906038	5896.02	-0.00493486	0.337169	0.947457	0.989999
MER99	hAT?	48.1833	0.00534825	0.034892	0.186494	0.99737	11.445	-0.132782	0.395995	0.471783	0.844396	11.445	-0.0924303	0.338737	0.49334	0.873299
RLTR13D1	ERVK	107.796	0.00407629	0.0342754	0.514922	0.99737	21.6758	0.430419	0.476446	0.101366	0.452346	21.6758	0.149605	0.330948	0.374672	0.804506
LTR16A1	ERVL	81.0513	0.00665143	0.0351889	0.128405	0.99737	19.1712	0.661251	0.516174	0.0315775	0.229228	19.1712	0.0268785	0.295849	0.871136	0.976386
LTR78	ERV1	109.791	0.00542087	0.0346069	0.358344	0.99737	35.0355	0.0161257	0.332417	0.940766	0.988448	35.0355	-0.170887	0.334187	0.325713	0.769775
MamRep1879	hAT-Tip100?	53.523	0.00216762	0.0342472	0.66295	0.99737	7.32534	0.724183	0.866849	0.0308251	0.226588	7.32534	-0.10444	0.346258	0.442752	0.844284
MLT1J-int	ERVL-MaLR	118.894	-0.00191257	0.034002	0.758387	0.99737	22.9844	0.119244	0.322348	0.583888	0.891482	22.9844	-0.127119	0.302579	0.469416	0.861019
MER104	TcMar-Tc2	183.84	-0.00539666	0.0341726	0.48996	0.99737	44.45	0.0479008	0.335797	0.821424	0.963046	44.45	-0.0634746	0.303126	0.698189	0.943559
RMER16B	ERVK	52.6708	0.00058697	0.0342119	0.900601	0.99737	8.86322	-0.0438041	0.38331	0.795713	0.957293	8.86322	-0.101074	0.347417	0.42441	0.835527
LTR28B	ERV1	28.6083	-0.00154468	0.0343935	0.64809	0.99737	4.95862	0.00951622	0.390147	0.953917	0.99108	4.95862	0.200312	0.406062	0.14189	0.542272
RLTR48B	ERV1	60.4757	0.00137323	0.0341346	0.793438	0.99737	6.40447	0.280852	0.483748	0.160978	0.569284	6.40447	0.000696976	0.331875	0.995952	0.998792
MER67C	ERV1	96.9653	-0.00630695	0.0347703	0.311582	0.99737	13.8245	0.13776	0.379126	0.492725	0.853948	13.8245	-0.0490212	0.32032	0.732138	0.952021
ERVB4_1-I_MM-int	ERVK	302.982	-0.00812217	0.0348228	0.31262	0.99737	34.4285	0.22193	0.401447	0.306954	0.73678	34.4285	0.0753291	0.318967	0.626921	0.923029
RLTR20C	ERVK	119.616	-0.00532974	0.0346836	0.324403	0.99737	11.569	-0.0814832	0.378556	0.660431	0.919218	11.569	0.00668795	0.321261	0.96426	0.993085
L1M3e	L1	394.581	0.0130238	0.0366444	0.171106	0.99737	94.6377	0.0292015	0.33072	0.890537	0.976329	94.6377	-0.119063	0.312627	0.484227	0.868891
RLTR22_Mus	ERVK	406.832	-0.00837776	0.0345064	0.377232	0.99737	83.8334	0.0352662	0.318775	0.872846	0.972553	83.8334	-0.171045	0.319313	0.341684	0.782425
Eulor6B	DNA?	24.7218	-0.0019744	0.034461	0.515235	0.99737	3.43092	0.0238835	0.403129	0.859216	0.970849	3.43092	0.00100673	0.342045	0.992833	0.998623
RLTR12G	ERVK	180.814	-1.83777e-05	0.0335885	0.996533	0.998347	23.1812	-0.0320765	0.331588	0.87572	0.973408	23.1812	-0.225656	0.359066	0.2165	0.661876
RLTR30D_RN	ERV1	200.131	0.00324859	0.0343179	0.514885	0.99737	9.92542	-0.661368	0.592743	0.0346344	0.244093	9.92542	-0.381178	0.471328	0.0778986	0.405592
LTR33C	ERVL	80.6027	7.52881e-05	0.0340323	0.993449	0.99737	8.09803	-0.0244407	0.378916	0.886924	0.975449	8.09803	-0.0631382	0.335052	0.614824	0.919309
Charlie15b	hAT-Charlie	166.648	0.00390053	0.0340846	0.578338	0.99737	33.1915	0.243203	0.346394	0.29289	0.726284	33.1915	-0.0864423	0.291553	0.616005	0.919768
MER126	DNA	70.4246	0.00242468	0.0342043	0.663564	0.99737	13.9935	0.167021	0.358455	0.44107	0.828782	13.9935	-0.244836	0.380484	0.182676	0.613574
LTR84a	ERVL	71.0545	-0.00591812	0.0348294	0.275357	0.99737	10.3908	0.0562395	0.371376	0.766663	0.950017	10.3908	0.0602025	0.325884	0.66985	0.936806
Zaphod3	hAT-Tip100	97.5744	0.00186174	0.033953	0.770851	0.99737	15.3824	0.0569411	0.380242	0.753167	0.948028	15.3824	-0.0632208	0.333934	0.624543	0.921952
X1_LINE	CR1	5.42785	-0.00103287	0.0344909	0.556254	0.99737	2.16788	0.0860479	0.428563	0.36985	0.787144	2.16788	0.100115	0.371486	0.133482
LTR16E2	ERVL	69.9401	-0.00166509	0.0342117	0.732661	0.99737	12.9394	0.164893	0.37719	0.435375	0.826266	12.9394	-0.126054	0.334737	0.427039	0.837365
MER105	DNA	213.929	0.00510878	0.0339996	0.520356	0.99737	27.2244	0.0612209	0.336012	0.771782	0.951061	27.2244	-0.0118131	0.297178	0.940622	0.987766
MLT1N2	ERVL-MaLR	170.734	0.00433142	0.0341944	0.521816	0.99737	27.409	-0.0248131	0.33828	0.902278	0.980072	27.409	-0.016381	0.300003	0.917098	0.9851
UCON5	Unknown	4.66297	6.8104e-05	0.0344807	0.964704	0.99737	1.75125	0.131743	0.437874	0.273683	0.709417	1.75125	-0.0143422	0.348177	0.861102
Eulor11	DNA	6.47409	-0.00182624	0.034539	0.298754	0.99737	4.01305	0.0482624	0.395644	0.758366	0.94864	4.01305	0.0246036	0.336744	0.830098	0.971197
ORSL-2a	hAT-Tip100	21.4022	-0.00388468	0.0346784	0.240222	0.99737	2.8954	0.048316	0.397978	0.753796	0.948028	2.8954	-0.0307687	0.340782	0.767241	0.96207
Eulor1	DNA	7.78429	-0.00373645	0.0347622	0.0536672	0.777469	2.07034	0.0584742	0.412766	0.635686	0.91088	2.07034	0.0678093	0.354238	0.42309
IAPEY_LTR	ERVK	230.09	-9.80358e-05	0.0341	0.983604	0.99737	89.7537	0.149005	0.270198	0.481815	0.848512	89.7537	0.0374675	0.244602	0.834379	0.971197
UCON29	PiggyBac?	48.416	0.0027729	0.0343994	0.530809	0.99737	7.19946	0.0602031	0.379175	0.741762	0.94552	7.19946	-0.427233	0.721767	0.0256856	0.218514
MER124	DNA?	48.9366	0.00774855	0.0355459	0.0706496	0.873991	7.47444	0.0486105	0.372658	0.794601	0.956954	7.47444	-0.0741475	0.332538	0.584881	0.908925
MER76	ERVL	70.8274	0.0020785	0.0343216	0.635006	0.99737	15.1765	-0.0951105	0.348202	0.645401	0.913704	15.1765	-0.0164369	0.301431	0.915986	0.984447
RLTR35B_MM	ERVL	131.22	-0.00539472	0.034699	0.318841	0.99737	18.4501	0.479039	0.468185	0.0779137	0.39364	18.4501	0.0217821	0.297704	0.893317	0.978833
MT-int	ERVL-MaLR	339.281	0.00337571	0.0337306	0.675359	0.99737	84.3039	0.43002	0.499516	0.0989519	0.447491	84.3039	0.36968	0.48041	0.0802584	0.412129
RLTR8	ERVK	229.531	0.00526809	0.0343827	0.442976	0.99737	35.8193	0.2413	0.321185	0.289566	0.723025	35.8193	0.0996373	0.276734	0.578311	0.906572
hAT-N1_Mam	hAT?	122.997	-0.0161574	0.0397063	0.0151197	0.487254	17.1665	0.0767195	0.358459	0.706559	0.93517	17.1665	-0.312429	0.46198	0.0934165	0.446364
MamRep488	hAT-Tip100	5.11807	-0.00217563	0.0345899	0.103464	0.99737	2.41439	0.0144747	0.401453	0.917289	0.983512	2.41439	0.0288439	0.342384	0.77293
X8_LINE	CR1	48.7481	-0.000464732	0.034327	0.880009	0.99737	9.85585	0.0111557	0.377269	0.951397	0.990725	9.85585	-0.0205056	0.327523	0.871036	0.976386
MER63B	hAT-Blackjack	174.148	0.00153059	0.0338062	0.809725	0.99737	35.3497	0.247673	0.373787	0.282996	0.716591	35.3497	-0.0706249	0.301495	0.669794	0.936806
Charlie17a	hAT-Charlie	36.5586	0.00578904	0.0349715	0.171666	0.99737	3.75427	0.418778	0.623011	0.0682018	0.364936	3.75427	0.127281	0.360744	0.313969	0.759569
LTR88b	Gypsy?	13.8807	-0.0038128	0.0347478	0.118897	0.99737	9.67588	-0.0110669	0.392665	0.940605	0.988448	9.67588	0.0333475	0.337357	0.769685	0.962725
RLTR48C	ERV1	73.2886	-0.00124982	0.0340428	0.827478	0.99737	12.9529	0.13014	0.372867	0.52299	0.86508	12.9529	0.0900359	0.324054	0.556984	0.899145
MLT1I-int	ERVL-MaLR	4.32654	-3.33257e-05	0.0344843	0.981126	0.99737	2.55589	-0.0728135	0.420393	0.509257	0.861821	2.55589	-0.0352992	0.349716	0.646151	0.929557
L5	RTE-X	19.6688	-0.00288291	0.0345593	0.3398	0.99737	7.82373	0.110876	0.388039	0.549701	0.87841	7.82373	0.109723	0.34322	0.427369	0.83741
Tigger17	TcMar-Tigger	221.638	0.00498493	0.0338133	0.566895	0.99737	94.7906	0.0778177	0.369924	0.690297	0.929121	94.7906	-0.0394663	0.320197	0.781142	0.964864
MER65-int	ERV1	17.5723	-0.000967643	0.0344386	0.702344	0.99737	1.29903	-0.0185766	0.418501	0.825995		1.29903	-0.0447936	0.356213	0.467862
RLTR49	ERVK	651.445	-0.0014297	0.0333645	0.860195	0.99737	74.6075	0.161281	0.280104	0.455064	0.835529	74.6075	-0.0605569	0.253381	0.73341	0.952815
L1M2a	L1	63.7765	0.00640798	0.0349718	0.229188	0.99737	12.8748	-0.166353	0.388964	0.409156	0.811133	12.8748	-0.132582	0.340813	0.387053	0.811527
RLTR50A	ERVK	5.08228	-0.000664475	0.0344809	0.71197	0.99737	1.59664	0.0914948	0.428633	0.383572	0.795723	1.59664	0.000468522	0.350086	0.993287
MamGypLTR1d	Gypsy	10.7556	0.00522446	0.0350565	0.00656261	0.335385	2.34883	0.0641941	0.419811	0.55062	0.878565	2.34883	0.0629017	0.356569	0.395198
MER67D	ERV1	28.9117	0.00181925	0.0343762	0.628469	0.99737	10.2287	0.039824	0.378295	0.825108	0.964118	10.2287	-0.162819	0.375382	0.222431	0.667732
MER96	hAT-Tip100	24.4667	-0.000117691	0.0343686	0.973955	0.99737	5.51767	0.236448	0.452458	0.213411	0.645983	5.51767	-0.0168398	0.331409	0.88975	0.978036
[truncated: 273 more rows]
