# Supplementary material for: Obox4 promotes zygotic genome activation upon loss of Dux
Source: eLife. 2024 Jun 24;13:e95856. doi: 10.7554/eLife.95856 (PMC11196112; doi:10.7554/eLife.95856)
Supplement: Supplementary file 9. [file elife-95856-supp9.xlsx]

## Sheet: Genes
# Supplementary Table 9
# Gene expression changes in Dux/Obox4 knockdown and Obox knockout 2C embryos
Geneid	symbol	baseMean_DuxKD	log2FoldChange_DuxKD	lfcSE_DuxKD	pvalue_DuxKD	padj_DuxKD	baseMean_Obox4KD	log2FoldChange_Obox4KD	lfcSE_Obox4KD	pvalue_Obox4KD	padj_Obox4KD	baseMean_doubleKD	log2FoldChange_doubleKD	lfcSE_doubleKD	pvalue_doubleKD	padj_doubleKD	baseMean_OboxKO	log2FoldChange_OboxKO	lfcSE_OboxKO	pvalue_OboxKO	padj_OboxKO
ENSMUSG00000102693	RP23-271O17.1	10.0777	-0.101398	0.305821	0.151645	0.384307	15.3832	0.00416098	0.151371	0.88179		10.1633	-0.784521	1.35336	0.0199601	0.0591567
ENSMUSG00000051951	Xkr4	12.9083	-0.0162034	0.273753	0.849659	0.9423	12.1291	-0.00490204	0.151765	0.843748		13.2296	-0.105221	0.446971	0.637524	0.784596	7.91078	6.29748	2.82822	9.43074e-05	0.00100015
ENSMUSG00000102343	RP23-333I7.1	49.9541	-0.13513	0.270295	0.335796	0.61288	52.0511	-0.0122055	0.145849	0.79691		50.7674	-0.469526	0.416073	0.107497	0.229067	29.3388	1.19345	0.732715	0.0312212	0.0964705
ENSMUSG00000025900	Rp1	71.8911	-0.114011	0.243219	0.434719	0.701622	73.3864	-0.00742338	0.142688	0.88807	0.960643	80.0156	-0.210556	0.30533	0.389051	0.579923	8.76868	0.408271	0.751124	0.403992	0.57567
ENSMUSG00000025902	Sox17	26.0872	-0.200273	0.346963	0.115555	0.321852	26.192	-0.0400181	0.157059	0.257061		25.6198	-1.11185	0.719717	0.0105362	0.034904	16.8511	5.05753	1.30041	1.79984e-05	0.000255129
ENSMUSG00000104328	RP23-37D15.1	38.9945	0.0307821	0.253036	0.805184	0.922383	31.1098	-0.0252018	0.151739	0.502683		35.3177	-0.259037	0.407081	0.333929	0.523713
ENSMUSG00000098104	Gm6085	17.6173	0.0383975	0.270953	0.702252	0.872011	14.1477	-0.00633397	0.15141	0.816264		18.5142	0.0397922	0.413708	0.870734	0.933477
ENSMUSG00000102175	RP23-34E15.2	11.7602	0.179253	0.361893	0.0354278	0.144307	4.13074	-0.000315807	0.153065	0.980515		5.77637	0.0584379	0.476952	0.733096
ENSMUSG00000103922	RP23-34E15.4	9.27885	0.109845	0.309786	0.132447	0.352407	3.80845	-0.00247479	0.15315	0.86264		9.15438	0.307377	0.562686	0.176459	0.331815	3.30263	0.12135	0.824665	0.765728	0.85888
ENSMUSG00000033845	Mrpl15	69.8582	0.836089	0.472948	0.0046426	0.0312148	59.2376	0.166418	0.281735	0.0239933	0.13685	68.821	0.693334	0.395	0.0216739	0.06327	222.474	-1.53428	0.626622	0.0030663	0.0165218
ENSMUSG00000025903	Lypla1	1065.9	-0.137878	0.117725	0.19774	0.450384	1100	0.0604898	0.0989166	0.432133	0.726865	1173.67	-0.190838	0.1141	0.0855465	0.192051	933.802	0.0335256	0.301341	0.909108	0.949958
ENSMUSG00000033813	Tcea1	6973.24	-0.332456	0.0781962	9.7297e-06	0.000190655	7008.04	-0.133047	0.0740038	0.0411119	0.194826	7249.22	-0.588209	0.0723393	1.96563e-16	5.83915e-15	1418.31	-0.706307	0.283125	0.00847818	0.0362468
ENSMUSG00000062588	Gm6104	61.5387	0.0671549	0.238687	0.632808	0.834735	72.7144	0.101174	0.189536	0.0823079	0.299754	73.2468	0.244698	0.316839	0.332722	0.522272	17.8543	0.076138	0.555424	0.867244	0.923977
ENSMUSG00000103280	RP24-426M1.4	13.082	2.13643	1.22248	0.00266045	0.0200182	5.37616	0.0188237	0.154679	0.257576		28.3172	3.69167	0.814377	7.13229e-07	6.35882e-06	2.64499	-0.0268993	0.833793	0.941332
ENSMUSG00000002459	Rgs20	12.7971	0.092685	0.296353	0.263771	0.536473	7.62916	-0.00205738	0.152601	0.911705		19.213	0.736828	0.840078	0.0398631	0.104841
ENSMUSG00000102653	RP24-141F9.2	4.45455	0.062842	0.294559	0.189309							5.07614	0.258846	0.570471	0.13118
ENSMUSG00000033793	Atp6v1h	611.598	-0.274429	0.137867	0.0243308	0.109921	607.238	-0.0984831	0.118437	0.2369	0.542644	666.616	-0.382582	0.132744	0.00272562	0.0109311	678.061	0.62256	0.339197	0.0485056	0.132485
ENSMUSG00000104352	RP23-267J18.2	2.62508	0.0187091	0.285699	0.673335
ENSMUSG00000104046	RP23-267J18.1	983.537	-1.24743	0.152941	2.7624e-17	4.67398e-15	1060.79	-0.0881696	0.179655	0.102055	0.340098	1325.56	-0.497206	0.118409	1.49186e-05	0.000103183	60.6365	-1.23366	0.514409	0.00546544	0.0259138
ENSMUSG00000102907	RP23-335P21.1	8.00121	0.105753	0.307338	0.146735		6.88839	0.0228751	0.155207	0.229595		14.1594	1.60786	1.12038	0.00746185	0.0259779
ENSMUSG00000025905	Oprk1	6.22353	0.0120143	0.281625	0.847988		3.95445	-0.0088865	0.153551	0.528913		4.94017	-0.0920014	0.48677	0.574653		4.92439	4.64842	3.33594	0.00323563	0.0172208
ENSMUSG00000093015	Gm22463	5.31491	0.0294517	0.283774	0.626283		5.56644	0.0118949	0.153486	0.501042		4.31282	-0.020476	0.478108	0.894522
ENSMUSG00000025907	Rb1cc1	13871.5	-0.0988567	0.0745595	0.168979	0.411103	13326.5	-0.0498444	0.0694816	0.426894	0.723211	16659	0.101185	0.0672725	0.129333	0.263872	2640.94	-0.982355	0.31074	0.000780089	0.00559806
ENSMUSG00000090031	4732440D04Rik	190.145	-0.482002	0.247937	0.00989205	0.0565787	164.669	-0.80724	0.293401	0.000266286	0.00501541	185.363	-1.1083	0.269969	6.1178e-06	4.58572e-05	66.5853	-0.482964	0.477894	0.23946	0.40724
ENSMUSG00000103355	RP23-76C20.3	9.06923	0.0375101	0.280364	0.628251	0.832335	7.70672	0.00398013	0.152459	0.850534		7.54866	-0.0492863	0.464672	0.792994	0.887362	3.49375	0.162169	0.803254	0.708994	0.818578
ENSMUSG00000103845	RP23-76C20.4	50.4282	0.163441	0.279366	0.267273	0.541674	46.3261	0.0371769	0.15272	0.410496		56.133	0.303966	0.354878	0.253983	0.432284	5.77096	0.448318	1.00481	0.219069	0.382727
ENSMUSG00000033740	St18	399.103	-0.443317	0.188832	0.00463839	0.0311973	390.846	-0.256694	0.189687	0.0247305	0.139715	472.166	-0.297867	0.160383	0.0491192	0.123823	31.296	0.454827	0.596959	0.333582	0.508019
ENSMUSG00000102534	RP23-5K7.3	5.29709	-0.0506164	0.288183	0.397669		4.39772	-0.0150708	0.154326	0.27341		4.93538	-0.263744	0.573699	0.123916
ENSMUSG00000051285	Pcmtd1	1060.94	-0.0652673	0.11652	0.538726	0.779139	1013.61	-0.0290044	0.0976015	0.700409	0.883491	1238.53	0.0504671	0.109634	0.638172	0.784842	290.922	0.254608	0.281916	0.344545	0.518894
ENSMUSG00000103509	WI1-817D1.2	19.1165	0.120694	0.298629	0.261279	0.533133	13.9676	0.0048511	0.151415	0.861155		18.6241	0.152339	0.434856	0.533775	0.706652	1.7973	-0.107235	0.895456	0.707913
ENSMUSG00000048538	Gm9826	3.52588	-0.0307562	0.286311	0.532904		2.46231	-0.0133623	0.154418	0.180199		4.28364	-0.0721197	0.485586	0.643835
ENSMUSG00000097797	Gm26901	2.768	-0.00197519	0.284878	0.961298		2.79313	0.00102394	0.153302	0.937698		2.838	-0.01898	0.487952	0.88391
ENSMUSG00000103067	RP24-181G14.2	15.086	-0.104435	0.295488	0.280089	0.555226	19.6369	0.00858017	0.150882	0.784198		18.5967	-0.15218	0.43354	0.533202	0.706335
ENSMUSG00000025909	Sntg1	9.77892	0.00815114	0.277945	0.915094	0.970171	11.3979	0.0150008	0.153109	0.518032		11.509	0.0500775	0.452632	0.810503	0.897281	3.73966	0.498506	1.12916	0.0429345	0.12185
ENSMUSG00000086235	Gm16284	4.11399	0.010396	0.283271	0.848551		4.33789	0.00608485	0.153185	0.70014		2.74425	-0.0953259	0.503655	0.439569
ENSMUSG00000084353	Gm15452	80.1197	-0.00640024	0.223821	0.961937	0.986319	91.0316	0.0876836	0.170296	0.175355	0.465063	66.1115	-0.881089	0.40247	0.00539787	0.0197637	13.8805	-0.221887	0.634587	0.636476	0.767088
ENSMUSG00000102871	RP23-411P10.1	3.86033	-0.0617624	0.294704	0.180469		4.11813	-0.0143475	0.154156	0.318722		3.92796	-0.270047	0.600166	0.0452705
ENSMUSG00000101571	RP23-411P10.5	14.6018	0.232013	0.423783	0.0180187	0.0880259	5.45635	0.00347884	0.153028	0.830412		9.20794	0.198856	0.511891	0.308759	0.497
ENSMUSG00000104428	RP23-411P10.3	7.10957	-0.103011	0.307637	0.121412		9.81022	-0.00464616	0.152068	0.840701		9.6767	-0.181748	0.4848	0.399649	0.590199
ENSMUSG00000061024	Rrs1	915.522	-1.02625	0.130347	3.17196e-16	5.01788e-14	964.232	-0.574595	0.139537	2.88737e-06	0.00012349	1176.88	-0.488128	0.113824	1.02977e-05	7.37557e-05	183.28	-1.12267	0.37351	0.00108004	0.00728747
ENSMUSG00000025911	Adhfe1	57.1834	0.0278778	0.237295	0.839202	0.938352	51.6868	-0.00438541	0.145143	0.925366		62.8113	0.024012	0.310152	0.923957	0.962373	27.2206	0.544574	0.560766	0.234475	0.4015
ENSMUSG00000079671	2610203C22Rik	87.0393	0.00687304	0.22123	0.963321	0.98649	76.4338	-0.0260332	0.145816	0.622456	0.841288	85.8354	-0.259918	0.296148	0.282085	0.465256	92.7384	1.04747	0.452349	0.00890034	0.0376407
ENSMUSG00000081441	Gm6161	3.93372	-0.0686675	0.296237	0.170267		4.33519	-0.0131331	0.153889	0.393411		5.56118	-0.12614	0.491023	0.471459
ENSMUSG00000025912	Mybl1	4451.56	-0.170285	0.0821629	0.0300607	0.128075	4215.35	-0.144706	0.0888479	0.0509938	0.223962	5216.53	-0.0394201	0.0775006	0.605483	0.761054	567.114	0.510535	0.430008	0.182668	0.337684
ENSMUSG00000045210	Vcpip1	2096.63	-0.460308	0.116975	2.22247e-05	0.000389593	2124.8	-0.212952	0.105118	0.0122136	0.0873878	2316.32	-0.51807	0.101992	2.01726e-07	1.99569e-06	354.377	-0.303423	0.337784	0.332669	0.506962
ENSMUSG00000097893	1700034P13Rik	10.4395	0.0870977	0.293838	0.295127	0.571395	8.33113	0.0125036	0.153024	0.565146		13.9201	0.45358	0.628855	0.108506	0.230501	4.31208	-0.330416	0.837087	0.459414	0.626618
ENSMUSG00000025915	Sgk3	586.883	0.375795	0.158118	0.00605644	0.0384616	381.647	-0.610807	0.186025	6.44151e-05	0.00160569	570.94	0.0629213	0.141152	0.643726	0.788832	216.569	-2.08162	0.360058	1.21142e-09	5.8226e-08
ENSMUSG00000046334	Gm6195	2.68893	0.0129714	0.285254	0.768289
ENSMUSG00000046101	Mcmdc2	21.027	0.42289	0.778011	0.0186425	0.0903025	11.2498	0.0119445	0.152487	0.628934		21.9846	0.902871	0.759889	0.025431	0.0721459	2.45792	-0.124991	0.840762	0.743562
ENSMUSG00000098234	Snhg6	57.5046	0.585915	0.503494	0.0187199	0.0905649	42.7203	0.036216	0.153439	0.393313		61.2011	0.663581	0.414241	0.030323	0.083444	111.811	-0.682151	0.457434	0.0871101	0.202106
ENSMUSG00000099032	Tcf24	15.4529	-0.0621502	0.282366	0.479376	0.736553	21.6014	0.02181	0.152736	0.487184		16.3343	-0.296844	0.495528	0.251594	0.429327	14.5569	-0.0618619	0.667401	0.892386	0.940632
ENSMUSG00000104025	RP23-228G18.3	2.71018	0.00245924	0.285173	0.95547
ENSMUSG00000025916	Ppp1r42	8.08721	0.0906552	0.298966	0.219518		8.214	0.0277751	0.156178	0.18182		7.24782	0.144191	0.487904	0.454424	0.640696	3.4993	0.186809	0.867113	0.617125	0.753749
ENSMUSG00000025917	Cops5	295.773	0.120217	0.168547	0.383293	0.65674	258.624	-0.0160708	0.12524	0.82522	0.936141	327.001	0.129477	0.173289	0.427748	0.616149	283.511	-0.69539	0.442993	0.0740659	0.180197
ENSMUSG00000056763	Cspp1	328.125	0.677615	0.188486	4.43396e-05	0.00069859	262.669	0.152292	0.175526	0.103423	0.342727	489.681	1.33923	0.164638	5.87057e-17	1.85816e-15	233.661	0.735736	0.441606	0.0594245	0.154583
ENSMUSG00000067851	Arfgef1	23353.2	-0.300959	0.0714368	1.33043e-05	0.000249879	22871	-0.181781	0.0698594	0.00377254	0.0374002	24987.5	-0.449373	0.0704325	9.61108e-11	1.51884e-09	2933.83	0.147537	0.249614	0.542812	0.695897
ENSMUSG00000088153	Gm26348	5.26621	-0.0322337	0.28451	0.585328		4.17516	-0.0142912	0.154163	0.317159		5.24581	-0.154414	0.505625	0.365213		2.19427	0.268315	0.924224	0.413409
ENSMUSG00000042501	Cpa6	14.1235	-0.0379861	0.275231	0.671002	0.85593	16.9192	0.0131378	0.151655	0.658537		16.0546	-0.0875136	0.430806	0.705741	0.83016	5.36825	0.829491	1.12344	0.112362	0.241778
ENSMUSG00000103448	RP24-88A10.2	4.16261	0.0499157	0.289936	0.332693
ENSMUSG00000100212	Gm5522	12.8926	0.0999396	0.296378	0.272479	0.547835	11.7569	0.0232797	0.15435	0.352011		12.9967	0.193933	0.472081	0.406999	0.597018	3.71484	0.605568	1.22869	0.0311569	0.0963356
ENSMUSG00000048960	Prex2	574.296	-0.890738	0.154308	7.86169e-10	4.39577e-08	613.735	-0.379968	0.161814	0.00184937	0.0219754	589.59	-1.29205	0.148265	4.22587e-19	1.63508e-17	186.921	0.0620274	0.405844	0.868126	0.924652
ENSMUSG00000103494	RP23-366M5.2	3.23014	-0.0124415	0.284754	0.784919		4.01134	0.0038436	0.153125	0.802805		3.05955	-0.0825046	0.497001	0.527183
ENSMUSG00000057715	A830018L16Rik	52.0814	-0.0698475	0.248597	0.601652	0.81821	61.1817	0.0495843	0.154205	0.347333	0.654294	51.5628	-0.401207	0.37902	0.147336	0.29094	30.0332	0.815666	0.602591	0.0907769	0.207946
ENSMUSG00000093864	Gm22633	7.328	0.0435405	0.283708	0.537577		7.58349	0.0158189	0.153678	0.436223		6.01885	-0.0164424	0.467987	0.924077
ENSMUSG00000097171	Gm17644	3.73127	0.0200646	0.284795	0.691988
ENSMUSG00000101314	Gm29663	3.40386	-0.0714927	0.299032	0.0777289		3.42484	-0.0162739	0.154685	0.177554		3.64171	-0.281788	0.611517	0.0448507		5.61098	1.51861	1.68673	0.0320944	0.0984041
ENSMUSG00000016918	Sulf1	50.3183	0.0375191	0.243119	0.77985	0.910004	39.8824	-0.0370812	0.153051	0.398291		50.5101	-0.117545	0.339669	0.640618	0.786308	20.9994	1.91768	0.845865	0.00341026	0.017956
ENSMUSG00000025938	Slco5a1	335.348	-0.153636	0.162385	0.254032	0.525176	325.485	-0.0526286	0.12668	0.496052	0.769305	354.765	-0.351195	0.177297	0.0335801	0.0910401	69.2956	1.06337	0.571959	0.0252255	0.0824841
ENSMUSG00000069620	Gm5250	3.35134	0.047056	0.291243	0.241891							5.12619	0.271258	0.589218	0.0860546		3.04292	-1.17577	2.33349	0.0141975	0.0536807
ENSMUSG00000099498	Gm29283	19.547	0.00906438	0.266378	0.931489	0.975838	16.8167	-0.00794619	0.151357	0.777334		21.0983	-0.0173975	0.404424	0.940226	0.968829	3.79982	-0.335492	0.918031	0.377609	0.549728
ENSMUSG00000042414	Prdm14	17.7875	0.0425901	0.271623	0.673086	0.856859	16.934	0.0111283	0.151613	0.700304		31.7518	0.924432	0.598598	0.016611	0.0508625	21.3223	-0.81923	0.898749	0.133399	0.272497
ENSMUSG00000005886	Ncoa2	12781.6	-0.206241	0.0746015	0.00407557	0.0279234	12800.3	-0.0368982	0.071708	0.560002	0.808967	14336.9	-0.201537	0.069883	0.00348539	0.0134785	1217.68	0.287859	0.33731	0.360949	0.534401
ENSMUSG00000103506	RP23-93D12.2	18.7174	-0.113096	0.295702	0.280775	0.556	15.6204	-0.0447942	0.161051	0.105744		18.6774	-0.51863	0.626299	0.0915582	0.202064	1.61213	-0.141027	0.905281	0.614418
ENSMUSG00000104170	RP23-125I14.3	5.90067	0.0981723	0.309954	0.0470799							2.77174	0.104013	0.506835	0.383812
ENSMUSG00000103085	RP23-125I14.2	30.4051	0.0460573	0.261358	0.696804	0.869425	31.8246	0.0334704	0.15331	0.404709		28.7278	-0.12125	0.388125	0.632981	0.781611	3.29074	0.398385	0.96477	0.282282	0.454162
ENSMUSG00000102664	RP23-125I14.1	14.8954	0.0184883	0.271911	0.843059	0.939802	13.3007	0.000234225	0.151384	0.995643		16.669	0.0435775	0.42907	0.851535	0.922006	1.62065	0.28593	0.991066	0.193628
ENSMUSG00000101476	Gm29570	21.5723	-0.00661009	0.264613	0.947189	0.981646	20.8917	0.00137063	0.150167	0.968994		22.8431	-0.0792834	0.406989	0.744036	0.857532
ENSMUSG00000025935	Tram1	4696.43	-0.184224	0.0853325	0.0239415	0.108565	4635.96	-0.0532337	0.0769717	0.423723	0.720724	4834.04	-0.455813	0.0836154	3.02128e-08	3.35878e-07	1352.39	1.35454	0.463018	0.00106369	0.00720831
ENSMUSG00000025937	Lactb2	270.285	0.0448863	0.165053	0.741513	0.891511	250.53	0.00272315	0.127641	0.970864	0.990427	274.21	-0.192389	0.185963	0.264119	0.444251	241.448	-0.971167	0.560218	0.0356363	0.106097
ENSMUSG00000102982	RP23-70F22.2	46.937	0.0533807	0.246772	0.689649	0.865563	37.8808	-0.0243215	0.149803	0.570823		51.16	0.0609435	0.331077	0.810055	0.897226	12.5747	-0.0161216	0.655631	0.969528	0.983094
ENSMUSG00000067813	Xkr9	15.78	0.179414	0.345504	0.0978629	0.289526	9.14764	0.00351486	0.152148	0.879831		13.5497	0.208311	0.473941	0.382829	0.573941	8.36033	-0.204523	0.828175	0.62137	0.757203
ENSMUSG00000102166	RP23-74B7.1	4.08095	-0.0238964	0.284394	0.657335		4.149	-0.00436016	0.153102	0.778248		5.47391	-0.005539	0.471419	0.971586
ENSMUSG00000025932	Eya1	1289	-0.205403	0.115398	0.0509939	0.186827	1292.06	-0.0372502	0.0942848	0.617571	0.838328	1359.46	-0.406154	0.114285	0.000252743	0.00133753	206.256	1.02682	0.353638	0.0017605	0.010694
ENSMUSG00000095853	Gm22616	6.51673	0.0445553	0.285725	0.486318		2.89201	-0.00930644	0.153806	0.427318		4.28371	-0.0579406	0.482493	0.712071
ENSMUSG00000081201	Smt3h2-ps4	3.70047	0.057158	0.293114	0.222321		2.60694	0.0088021	0.153807	0.435245		2.85583	0.0913288	0.503087	0.457123
ENSMUSG00000032769	Trpa1	106.034	0.00420814	0.211716	0.979003	0.992055	99.8218	-0.000897031	0.139503	0.984614	0.995709	102.594	-0.326067	0.290676	0.174648	0.329063	26.0566	0.868691	0.573755	0.0635306	0.16172
ENSMUSG00000092083	Kcnb2	80.9057	-0.0837309	0.232215	0.560247	0.792768	79.7236	-0.0117345	0.141729	0.831645	0.938874	98.4489	0.040188	0.26682	0.861198	0.927684	3.79614	0.389833	0.876589	0.382041	0.554109
ENSMUSG00000025925	Terf1	597.383	0.030701	0.13303	0.796032	0.917933	660.821	0.367678	0.155036	0.00191155	0.0224901	771.216	0.403358	0.138076	0.00235453	0.00959145	483.938	-0.360591	0.338528	0.250852	0.419252
ENSMUSG00000104379	RP23-325F17.4	7.42175	0.0316762	0.282255	0.643713		7.65228	0.0125341	0.15327	0.533145		5.35253	-0.0945154	0.485417	0.574234
ENSMUSG00000032719	Sbspon	5.61847	0.00855483	0.28136	0.892609		4.81385	-0.00146591	0.152912	0.926898		5.69707	-0.0156859	0.470692	0.924972		6.687	0.361295	0.846809	0.419034	0.590094
ENSMUSG00000100652	Gm7634	5.73446	0.0142913	0.281416	0.822803		5.75872	0.00632976	0.152914	0.730291		7.81384	0.139357	0.48196	0.482907	0.664909
ENSMUSG00000067795	4930444P10Rik	9.11092	0.042582	0.281577	0.578773	0.803268	10.8185	0.0264666	0.155338	0.265805		16.9457	0.787856	0.842801	0.0362302	0.096999	30.3824	-0.504793	0.873294	0.288574	0.461191
ENSMUSG00000043716	Rpl7	517.429	0.423601	0.181984	0.00549161	0.0356781	479.905	0.297777	0.207659	0.0165779	0.106622	573.488	0.44712	0.173776	0.00611493	0.0219457	755.265	-2.12752	0.553531	1.6586e-05	0.000237813
ENSMUSG00000025921	Rdh10	2317.13	-0.225895	0.101326	0.016738	0.0834027	2195.67	-0.19949	0.0960937	0.0123486	0.0878758	2490.94	-0.363086	0.0933787	7.29888e-05	0.000438948	986.49	0.558596	0.253176	0.0217274	0.0742097
ENSMUSG00000100868	Gm28095	3.06542	0.0603525	0.29576	0.109625
ENSMUSG00000025920	Stau2	1522.35	-0.218801	0.102434	0.0218094	0.101233	1521.64	-0.0494629	0.0939255	0.509902	0.778296	1612.61	-0.405201	0.104398	6.94937e-05	0.000420696	183.704	1.58701	0.503879	0.000388362	0.00318334
ENSMUSG00000089982	Gm7568	6.21524	0.0577614	0.288889	0.37749		4.55294	0.00479745	0.153175	0.753011		6.70287	0.15971	0.496246	0.401987	0.592424
ENSMUSG00000025939	Ube2w	1199.2	-0.171731	0.112858	0.0966599	0.28741	1205.67	-0.00939513	0.0960314	0.900011	0.963248	1233.15	-0.449478	0.114198	5.09288e-05	0.000317684	738.225	0.506088	0.280938	0.0587826	0.153478
ENSMUSG00000102457	RP23-382H8.2	72.6394	-0.804222	0.409755	0.00353363	0.0250208	76.4518	-0.11658	0.198339	0.082491	0.300237	81.277	-0.88001	0.363598	0.0031304	0.0122782	12.3541	0.648771	0.81919	0.21588	0.37889
ENSMUSG00000079658	Tceb1	1790.43	-0.322991	0.0987215	0.000495023	0.00515089	1925.32	0.0285551	0.087518	0.692813	0.879057	1833.89	-0.637901	0.100366	8.54983e-11	1.36703e-09	3254.46	-0.911774	0.331849	0.00326195	0.0173214
ENSMUSG00000097744	D030040B21Rik	25.2784	-0.0177671	0.262687	0.868319	0.95019	29.9463	0.0285728	0.153166	0.427115		32.8873	0.140872	0.401568	0.582751	0.744924	17.271	-0.461774	0.818327	0.338987	0.513492
ENSMUSG00000100959	Gm7654	3.12496	0.0019491	0.284739	0.967693							4.1543	0.045012	0.483294	0.767264		2.42036	-0.0193415	0.840887	0.956261
ENSMUSG00000025940	Tmem70	280.673	-0.187571	0.175761	0.186583	0.434741	295.589	0.021593	0.124282	0.776661	0.918386	312.078	-0.238697	0.186906	0.168395	0.320364	482.222	-0.901426	0.33161	0.00353762	0.0184605
ENSMUSG00000025779	Ly96	23.908	0.0736275	0.273634	0.509051	0.759245	21.8266	0.0161201	0.151119	0.634356		28.3622	0.249659	0.421551	0.35103	0.541351	99.6241	-0.742892	0.509998	0.0843352	0.197324
ENSMUSG00000091020	Gm5828	8.62447	0.0165429	0.27848	0.825732		8.47697	0.00611558	0.152518	0.773705		8.51407	-0.0249326	0.45708	0.896484	0.946509
ENSMUSG00000101640	Gm28376	38.5853	0.0304143	0.250249	0.812203	0.925554	54.7225	0.201887	0.384717	0.01309	0.0911148	34.1984	-0.316282	0.416811	0.251706	0.429485
ENSMUSG00000042686	Jph1	180.479	-0.0422117	0.18533	0.76536	0.902185	180.743	0.0217592	0.135583	0.744703	0.903369	216.097	0.110448	0.219672	0.578648	0.742123	10.4525	-0.170401	0.67185	0.715744	0.824082
ENSMUSG00000025777	Gdap1	10975.2	-0.250346	0.0780968	0.000817249	0.00774199	10410.7	-0.232458	0.073289	0.000435739	0.00740632	12145.7	-0.289945	0.0729209	5.73853e-05	0.000354199	2824.88	0.332296	0.312224	0.259499	0.429234
ENSMUSG00000099899	Gm28784	304.135	0.0115217	0.158019	0.934866	0.976846	297.311	0.0441061	0.124475	0.568024	0.813194	297.574	-0.345621	0.215658	0.0750556	0.173368	507.18	1.88761	0.536258	7.57623e-05	0.000840669
ENSMUSG00000100398	Gm5251	2.47696	-0.0206882	0.286529	0.608007							3.82441	0.0011358	0.480547	0.996588
ENSMUSG00000101589	Rbm6-ps1	28.0867	0.107259	0.280708	0.375093	0.649531	21.514	-0.00177775	0.150042	0.954709		27.9709	0.100665	0.391272	0.69373	0.822996
ENSMUSG00000067780	Pi15	8.18448	0.0166723	0.278574	0.824125		8.87073	0.0101153	0.152944	0.620891		11.2066	0.180139	0.477776	0.421742	0.610704
ENSMUSG00000085125	Gm16070	8.27651	0.033558	0.280998	0.64964		4.86845	-0.0114004	0.153641	0.467304		6.91955	-0.0559191	0.466555	0.76407	0.870257
ENSMUSG00000100554	Gm7690	3.03203	-0.0135612	0.285295	0.756031		3.01794	-0.00344802	0.153288	0.793848		3.18572	-0.0676356	0.491719	0.624445
ENSMUSG00000099591	Gm17969	7.79574	-0.00621911	0.278724	0.928759		6.58514	-0.0074686	0.152878	0.69358		8.15669	-0.0537	0.46116	0.782176	0.880909	3.42238	0.503616	0.952962	0.261441	0.431321
ENSMUSG00000042596	Tfap2d	6.85631	0.0433983	0.285302	0.501849		6.35903	0.00953777	0.153295	0.578118		6.19515	0.0363013	0.472961	0.834701
ENSMUSG00000100720	AC098736.2	12.9551	0.0538241	0.279758	0.545858	0.783802	14.1354	0.0250216	0.15455	0.340365		18.9702	0.447287	0.5695	0.127733	0.261256
ENSMUSG00000025927	Tfap2b	332.033	-0.292771	0.176633	0.0432403	0.166839	317.88	-0.162312	0.170648	0.0899595	0.316152	362.278	-0.413741	0.176686	0.0120092	0.0389916	49.9972	1.19961	0.538307	0.00898452	0.0379024
ENSMUSG00000100204	Gm4849	8.48543	0.0549477	0.285608	0.458523		4.96185	-0.00633684	0.153088	0.703095		11.0982	0.27613	0.527457	0.238834	0.413713
ENSMUSG00000043760	Pkhd1	527.498	-0.232512	0.143786	0.0630548	0.215665	548.218	0.00235329	0.107274	0.976727	0.992046	590.138	-0.259101	0.138709	0.0516008	0.128825	36.6585	1.21964	0.595979	0.0133811	0.0513142
ENSMUSG00000041872	Il17f	97.4635	0.132818	0.230725	0.38152	0.655102	95.4798	0.073647	0.159157	0.256085	0.565852	97.8977	-0.0056141	0.268954	0.980464	0.989749	139.014	1.30789	0.525193	0.00384089	0.0197289
ENSMUSG00000041859	Mcm3	1000.05	-0.0672389	0.112508	0.514734	0.762403	1102.55	0.276457	0.126513	0.00514693	0.0467474	1379.06	0.472527	0.107339	6.43948e-06	4.8053e-05	258.248	-0.618553	0.389251	0.0791049	0.188675
ENSMUSG00000102121	Gm28065	50.641	-0.0725753	0.248146	0.591059	0.810659	55.8824	0.0238107	0.147086	0.632113	0.845476	51.4688	-0.350809	0.373013	0.19717	0.360116	21.266	1.64589	0.748568	0.00512922	0.0246722
ENSMUSG00000025931	Paqr8	31.7463	0.25401	0.382795	0.0875839	0.268506	18.2642	-0.0135639	0.151626	0.64725		43.544	1.07446	0.54282	0.00569212	0.0206878	6.72091	0.210385	0.774181	0.647161	0.775589
ENSMUSG00000041809	Efhc1	15.9538	-0.0037378	0.271289	0.964928	0.986837	12.3212	-0.0175751	0.153306	0.471411		14.1073	-0.214071	0.487909	0.34782	0.538048
ENSMUSG00000041779	Tram2	241.371	0.144519	0.18145	0.315213	0.592772	210.526	-0.00516324	0.127335	0.940981	0.978722	274.571	0.228669	0.1875	0.189039	0.348804	164.891	0.122406	0.479662	0.768284	0.860575
ENSMUSG00000100819	Gm2693	5.39785	0.00116075	0.28145	0.987583		6.40773	0.00928295	0.153088	0.621563		4.95476	-0.0692516	0.48043	0.676679
ENSMUSG00000025933	Tmem14a	65.891	-0.0801987	0.242474	0.564931	0.795457	57.4583	-0.0532072	0.157645	0.280779	0.592551	59.0418	-0.764131	0.465525	0.0203512	0.0600981	34.3944	0.466703	0.540251	0.29596	0.468443
ENSMUSG00000102633	RP23-278E1.4	38.3577	0.120713	0.273566	0.366967	0.642719	28.5833	-0.0141352	0.149625	0.708085		28.8425	-0.384584	0.460308	0.179166	0.33557	81.7183	1.46682	0.563963	0.00228407	0.0130797
ENSMUSG00000025934	Gsta3	10.5841	0.157498	0.341085	0.0569299	0.201308	3.86107	-0.0021408	0.153144	0.879877		6.97473	0.113161	0.491151	0.502793	0.68175	2.62924	0.10002	0.901008	0.716229
ENSMUSG00000096375	Gm7094	6.01767	0.0019319	0.281031	0.977978		3.83445	-0.0125713	0.153944	0.373068		4.64433	-0.147613	0.507207	0.355242
ENSMUSG00000025936	Gm4956	8.52415	0.0771508	0.292471	0.307786		7.76153	0.0168719	0.153933	0.393397		7.54703	0.0997645	0.472232	0.610109	0.764526	7.21586	-0.962854	1.14496	0.0893498	0.205761
ENSMUSG00000067750	Khdc1a	6752.44	-0.105925	0.0770527	0.152502	0.385474	6760.81	0.040636	0.0715527	0.522285	0.787115	6898.7	-0.390374	0.0744169	1.08912e-07	1.12402e-06	454.293	0.622575	0.405755	0.088817	0.20503
ENSMUSG00000086194	Gm16329	54.0031	-0.161117	0.274802	0.275468	0.550427	57.1674	-0.0128165	0.144894	0.7972	0.926147	78.7559	0.217272	0.303981	0.376585	0.567644	10.711	-1.08676	1.0127	0.0692226	0.172027
ENSMUSG00000094436	Gm16327	38.5241	-0.138057	0.28101	0.308268	0.585711	45.5261	0.0168467	0.147412	0.714063		45.9289	-0.159254	0.348902	0.533823	0.706652	52.9964	-0.617128	0.507	0.148612	0.293001
ENSMUSG00000041722	Khdc1c	7112.94	-0.1386	0.0796001	0.0691399	0.230224	7532.1	0.14864	0.0755235	0.0250083	0.140681	6986.68	-0.565192	0.0776274	1.63608e-13	3.55055e-12	773.044	0.901336	0.390832	0.0114387	0.04564
ENSMUSG00000085507	Gm2709	36.8587	-0.0588837	0.260944	0.626207	0.831274	27.058	-0.0510342	0.163408	0.0927746		42.1868	-0.0962655	0.363714	0.705146	0.829728	16.4995	-0.803677	0.905964	0.135936	0.275685
ENSMUSG00000094926	Gm16533	10.9506	0.181719	0.361586	0.0450641	0.171563	5.54025	0.00845268	0.153252	0.614723		11.4037	0.544325	0.771763	0.0616843	0.148683	15.8902	-1.64508	1.19635	0.0197472	0.0690248
ENSMUSG00000085079	Khdc1b	43201.6	-0.224045	0.0757074	0.00206824	0.0164934	45400.7	0.0635067	0.0673323	0.30857	0.61999	47137.5	-0.307509	0.0693509	7.49466e-06	5.50765e-05	13114.3	0.698564	0.334872	0.0234316	0.0783864
ENSMUSG00000028033	Kcnq5	28.8416	0.09027	0.274016	0.44963	0.714185	25.0859	0.0126734	0.150366	0.718169		38.7521	0.524363	0.46937	0.0896811	0.198798	6.61513	-0.795225	1.21416	0.095652	0.215601
ENSMUSG00000082935	Gm7658	2.9517	-0.0158783	0.284949	0.73258		2.94097	-0.00302877	0.153279	0.817892		3.26332	-0.0483533	0.487773	0.730003		3.50013	-0.431853	0.923584	0.310679	0.48465
ENSMUSG00000041670	Rims1	3808.82	0.0671277	0.0924377	0.444399	0.709944	3861.21	0.228317	0.0870315	0.00244685	0.0269492	3850.72	-0.215094	0.0821027	0.00776148	0.0268065	704.701	1.14501	0.360066	0.000593403	0.00451745
ENSMUSG00000102766	RP23-28L24.5	5.1312	0.040427	0.28646	0.482047		8.42724	0.0371216	0.15928	0.0696291		6.17899	0.167088	0.505908	0.35787		1.99738	-0.00619981	0.834571	0.985344
ENSMUSG00000097970	Gm27028	4.39188	0.0628332	0.293688	0.233986		4.1537	0.0166176	0.154512	0.253103		3.77916	0.123559	0.503171	0.410985
ENSMUSG00000026158	Ogfrl1	387.501	-0.610123	0.184946	0.000148966	0.00189573	394.15	-0.292122	0.184415	0.0142157	0.0958527	401.665	-0.944106	0.175585	1.59396e-08	1.84956e-07	69.8558	0.684151	0.454819	0.0860135	0.200223
ENSMUSG00000026156	B3gat2	130.929	-0.0270686	0.206415	0.84705	0.941447	135.182	0.0421161	0.141331	0.525424	0.788621	134.386	-0.267129	0.252122	0.220825	0.390616	15.6141	2.21663	1.28244	0.00725042	0.0321616
ENSMUSG00000026155	Smap1	820.465	-0.00193157	0.119865	0.984766	0.994271	739.72	-0.079803	0.114623	0.326105	0.636575	908.726	-0.026568	0.120957	0.821543	0.90421	68.668	0.409026	0.417402	0.273762	0.444703
ENSMUSG00000026154	1110058L19Rik	97.347	-0.14651	0.236525	0.336859	0.613841	86.9415	-0.0997828	0.17897	0.136161	0.403799	96.4647	-0.603078	0.317588	0.0206865	0.0609245	25.7724	1.03816	0.708126	0.0510749	0.13776
ENSMUSG00000026153	Fam135a	1642.94	-0.197657	0.0996173	0.0337131	0.139158	1667.85	-0.00472283	0.0887724	0.947004	0.981124	1869.16	-0.157376	0.0975455	0.0995188	0.215649	495.507	0.273813	0.30541	0.344087	0.518488
ENSMUSG00000102398	RP23-255J24.2	6.16446	-0.030894	0.283024	0.626476		6.60366	-0.00266398	0.152626	0.886735		6.64472	-0.105149	0.479574	0.566871	0.732202
ENSMUSG00000026141	Col19a1	150.766	-0.288391	0.258152	0.0938966	0.281204	146.724	-0.0948561	0.167192	0.188385	0.480092	177.993	-0.235674	0.240471	0.263729	0.443765	23.172	0.714435	0.586629	0.129644	0.267309
ENSMUSG00000099997	Tubb4b-ps2	9.95695	0.0458898	0.281067	0.568788	0.797417	13.0143	0.0382019	0.158558	0.151385		11.331	0.137706	0.462173	0.533026	0.706167
ENSMUSG00000100131	Gm28439	142.476	-0.108414	0.20344	0.462627	0.724666	144.007	-0.000362347	0.13531	0.993801	0.997832	158.199	-0.163799	0.236912	0.433055	0.620709	95.8419	-0.213512	0.392913	0.54776	0.700272
ENSMUSG00000067736	Gm10222	847.46	-0.337896	0.139953	0.00649591	0.0407384	843.297	-0.145178	0.126221	0.102002	0.340098	1040.2	-0.0895534	0.121387	0.44827	0.635232	39.8308	-0.252898	0.507423	0.551645	0.702983
ENSMUSG00000101939	Gm28438	2164.26	-0.679977	0.103228	6.76715e-12	5.55592e-10	2102.78	-0.575952	0.102278	1.43233e-09	1.97312e-07	2658.19	-0.360619	0.09076	5.22206e-05	0.000324903	22.8454	-0.213014	0.544022	0.629559	0.762782
ENSMUSG00000101111	Gm28437	289.614	-0.681507	0.20456	0.000112843	0.00151115	280.207	-0.543739	0.239594	0.0013055	0.0168111	359.645	-0.360529	0.169778	0.0233907	0.0674665	87.1851	-0.12656	0.492652	0.760114	0.855198
ENSMUSG00000100862	Gm10925	417.148	-0.205978	0.155045	0.117246	0.324798	419.347	-0.0322933	0.118686	0.673764	0.867813	483.529	-0.131995	0.146527	0.345126	0.535366	423.029	0.312003	0.377956	0.367296	0.540055
ENSMUSG00000102070	Gm28661	155.811	-0.344271	0.246252	0.0491765	0.182089	161.244	-0.052364	0.143201	0.442102	0.734069	182.648	-0.286054	0.221915	0.150476	0.295076	144.12	0.405238	0.450535	0.306947	0.480354
ENSMUSG00000101249	Gm29216	100.598	-0.183167	0.242855	0.245459	0.514726	99.7003	-0.0362586	0.144147	0.518325	0.784039	112.037	-0.279281	0.268541	0.221136	0.390943	55.6607	0.0835993	0.425889	0.828113	0.899316
ENSMUSG00000073725	Lmbrd1	62.2139	-0.217623	0.29488	0.17279	0.416861	59.2791	-0.0644392	0.161697	0.227683	0.531493	63.809	-0.63227	0.383877	0.0309756	0.0850089	91.5046	-0.377048	0.502412	0.371705	0.543885
ENSMUSG00000033569	Bai3	115.122	-0.0782188	0.213602	0.589391	0.809285	119.769	0.0223782	0.139687	0.719374	0.891628	115.341	-0.412327	0.289196	0.0864194	0.193571	42.8215	0.745509	0.672631	0.140812	0.282425
ENSMUSG00000102747	RP23-184I13.6	3.34045	0.00870339	0.284227	0.85897		3.89193	0.00797501	0.153405	0.594895		4.08479	0.0590922	0.483722	0.706799		2.6378	0.167529	0.896265	0.597757
ENSMUSG00000102386	RP23-184I13.7	2.90352	0.0206916	0.28577	0.644282
ENSMUSG00000104516	RP23-184I13.1	3.46031	0.000964465	0.283719	0.987061		3.88584	0.00490441	0.153183	0.748456
ENSMUSG00000073722	4931408C20Rik	13.5667	-0.166944	0.340926	0.0877354	0.268843	15.4446	-0.0222485	0.153486	0.429936		13.894	-0.647438	0.894134	0.0444797	0.114449
ENSMUSG00000086240	Gm7846	8.66706	0.0545612	0.285175	0.465434		4.55633	-0.0102776	0.153515	0.514043		4.65075	-0.181701	0.522859	0.267466		3.71815	-0.160844	0.789706	0.710179	0.819582
ENSMUSG00000048411	Gm597	13.326	-0.0462651	0.281785	0.552472	0.787893	12.3146	-0.0171021	0.153376	0.463857		12.4794	-0.294484	0.552907	0.190111	0.350163	2.93516	-0.434229	0.974761	0.259387	0.429181
ENSMUSG00000053185	Gm9898	17.1309	-0.0961598	0.290996	0.321153	0.599022	16.6967	-0.0230994	0.153475	0.426159		14.9258	-1.14321	1.07908	0.0151625	0.0472092	13.0973	0.810999	0.924318	0.133744	0.272962
ENSMUSG00000048874	Phf3	16859.1	-0.211921	0.0741649	0.0030453	0.0222598	16132.9	-0.164987	0.0719285	0.010095	0.0761753	18937.9	-0.202605	0.0720221	0.00443843	0.0167039	1126.44	0.0611761	0.305993	0.835016	0.903071
ENSMUSG00000103783	RP24-172B22.6	5.10122	0.0203886	0.282956	0.730139		4.53626	0.00353352	0.153037	0.827119		3.83576	-0.0713524	0.489462	0.62112		3.39683	-0.288633	0.895761	0.446266	0.614783
ENSMUSG00000104315	RP23-471J16.2	5.70925	-0.0197425	0.282773	0.73705		5.75628	-0.00350286	0.15288	0.837151		4.92255	-0.150036	0.513468	0.320067		10.9514	-0.636661	1.02453	0.174731	0.326742
ENSMUSG00000026064	Ptp4a1	32.0726	0.0502772	0.25898	0.679499	0.859612	26.5222	-0.00944054	0.149492	0.794669		34.5543	0.0689222	0.370058	0.788754	0.885008	7.11828	-0.102951	0.760806	0.814568	0.890694
ENSMUSG00000117310		55.8226	-0.121819	0.259098	0.390455	0.663481	74.3344	0.100081	0.183374	0.115661	0.364911	72.7725	0.0704177	0.298978	0.772672	0.875456	56.658	0.428759	0.46937	0.293406	0.465708
ENSMUSG00000117091		358.474	-3.85293	0.600325	6.87035e-12	5.61694e-10	494.134	-0.810651	0.179613	3.59648e-07	2.30311e-05	387.278	-5.18264	0.267246	1.44296e-83	8.96492e-81	172.592	3.56511	0.426013	4.14681e-18	1.00692e-15
ENSMUSG00000086726	Gm9458	137.503	-1.50271	0.295528	2.09484e-08	8.40443e-07	141.522	-1.00737	0.298636	3.35229e-05	0.000952388	151.381	-1.58162	0.278978	1.55582e-09	2.08064e-08	4.23823	-0.59654	0.946467	0.221156	0.385293
ENSMUSG00000086727	4931428L18Rik	412.822	-1.8166	0.175632	2.9828e-26	1.00068e-23	485.773	-0.674879	0.200407	4.32148e-05	0.00115453	439.794	-2.17538	0.168807	4.67717e-39	6.82585e-37	337.244	2.15331	0.383187	3.15439e-09	1.37157e-07
ENSMUSG00000100237	Gm28644	16.7083	-0.150544	0.327182	0.116953	0.324242	20.6472	-0.00956643	0.151404	0.737123		19.4102	-0.386062	0.563812	0.14936	0.293709	2.54682	-0.0613504	0.868013	0.849132
ENSMUSG00000100910	Gm29128	9.11919	0.169373	0.353801	0.0366305	0.147736	3.00393	0.00055235	0.153219	0.969617		5.07938	0.117618	0.49358	0.48099		2.87649	-0.13836	0.835644	0.722792	0.82898
ENSMUSG00000100205	Gm4850	1377.08	-0.772927	0.120936	2.08439e-11	1.57202e-09	1607.26	-0.0567031	0.0993148	0.458641	0.744901	1515.66	-0.848413	0.116933	1.0644e-13	2.36178e-12	521.036	-6.25098	0.438256	2.28662e-47	1.06882e-43
ENSMUSG00000100592	Gm28645	821.911	-0.740505	0.141418	2.1363e-08	8.51805e-07	980.033	-0.0080634	0.097033	0.913719	0.968231	892.783	-0.875031	0.147267	6.85161e-10	9.68085e-09	477.309	-1.40359	0.587075	0.00427086	0.0214542
ENSMUSG00000094215	Gm6489	443.904	-2.35126	0.805144	0.000115556	0.00154006	677.354	-0.150833	0.134691	0.0977976	0.332464	461.504	-3.91356	0.199009	9.2347e-87	6.08511e-84	603.165	3.86475	0.664322	4.65368e-10	2.4956e-08
ENSMUSG00000026058	Khdrbs2	21.7017	-0.00800093	0.26412	0.937241	0.977562	24.8086	0.0266347	0.152676	0.459115		29.774	0.23965	0.410086	0.37058	0.561512	20.4055	0.136148	0.630837	0.774856	0.864873
ENSMUSG00000104498	RP23-109J14.3	2553.53	0.458146	0.0983009	8.96238e-07	2.36943e-05	2294.45	0.0822954	0.160197	0.240009	0.546881	2275.16	-0.131764	0.0992411	0.175085	0.329744	35.3084	0.198867	0.520359	0.649342	0.776992
ENSMUSG00000102917	RP23-75G11.4	35.8396	-0.074609	0.26131	0.550556	0.786313	27.2091	-0.074103	0.175365	0.0612383		33.1473	-0.605347	0.519421	0.0616142	0.14857
ENSMUSG00000100590	Gm4785	5.04207	-0.0108355	0.282855	0.845138		5.75688	0.00285284	0.15284	0.87382		6.76913	0.0323456	0.467311	0.862518	0.928258
ENSMUSG00000026134	Prim2	317.397	0.219913	0.173276	0.120574	0.330999	296.48	0.107302	0.148189	0.205125	0.500473	376.708	0.404052	0.173283	0.012805	0.041111	254.639	-0.670617	0.452684	0.0898638	0.206466
ENSMUSG00000102714	RP24-423J19.3	41.6737	0.179255	0.302035	0.211953	0.471065	27.5375	-0.0239552	0.151791	0.511188		58.1187	0.865318	0.424945	0.0080273	0.0276105	9.6416	-0.253709	0.761109	0.583829	0.729474
ENSMUSG00000102093	Gm17813	3.78556	0.0444516	0.289006	0.372216
ENSMUSG00000103746	RP24-423J19.1	20.0798	-0.121475	0.300345	0.249704	0.519706	20.9276	-0.022489	0.152828	0.471787		20.7586	-0.558871	0.63284	0.0768983	0.176555	11.3447	-0.485478	0.780078	0.326571	0.500574
ENSMUSG00000004768	Rab23	892.68	-0.249617	0.120822	0.0227311	0.104637	901.04	-0.0524358	0.101218	0.496326	0.769328	1099.98	0.00860928	0.117358	0.941075	0.968984	192.83	-0.271603	0.314424	0.357467	0.531496
ENSMUSG00000042215	Bag2	17.4377	0.312937	0.533893	0.0238163	0.10824	10.4249	0.0179364	0.15371	0.425577		25.2204	1.79082	0.727462	0.000932571	0.00424298	23.8897	-0.250124	0.612659	0.588821	0.733019
ENSMUSG00000042197	Zfp451	5798.05	-0.287155	0.0924948	0.000998825	0.00916319	5513.55	-0.262591	0.0809237	0.000270798	0.00507617	6226.1	-0.431341	0.0772795	1.51875e-08	1.77173e-07	361.902	-0.521665	0.315482	0.0775415	0.185871
ENSMUSG00000081402	Gm15455	3208.14	-0.600885	0.0893876	3.32021e-12	2.88414e-10	3363.1	-0.234819	0.0887724	0.00216808	0.0245322	4180.26	-0.10815	0.080199	0.171644	0.325008	474.924	-0.408286	0.426368	0.279679	0.451373
ENSMUSG00000042182	Bend6	83.0783	0.189697	0.258559	0.232558	0.497757	73.8671	0.0369501	0.147333	0.509694	0.778296	72.4264	-0.205065	0.309553	0.405063	0.595062	37.8848	0.471772	0.535205	0.287074	0.459264
ENSMUSG00000026131	Dst	10449.1	0.114714	0.0837169	0.151529	0.384164	9226.05	-0.0577434	0.0764815	0.383756	0.686905	12700.1	0.341366	0.0793127	1.28939e-05	9.07149e-05	667.022	-0.049654	0.303116	0.863891	0.921792
ENSMUSG00000103596	RP23-87D8.2	3.40942	0.0366078	0.287966	0.433156												1.88349	0.063092	0.871706	0.847038
ENSMUSG00000103364	RP23-87D8.4	7.62428	-0.0537708	0.287646	0.406211		9.3682	-0.000736744	0.152308	0.969285		9.88873	-0.0684216	0.462197	0.726479	0.845561
ENSMUSG00000096992	Gm26788	270.863	-0.079744	0.174969	0.567509	0.797126	253.906	-0.0571412	0.13238	0.453883	0.74276	308.586	-0.0651296	0.176308	0.692177	0.822248	12.5009	-0.303588	0.754599	0.519883	0.676474
ENSMUSG00000104397	RP24-152H15.5	6.24956	-0.0427742	0.285668	0.493279		7.12024	-0.0035759	0.152631	0.850531		10.3074	0.0717416	0.456604	0.729293	0.847639
ENSMUSG00000101206	Gm5266	9.74589	0.010992	0.276533	0.892125	0.960545	11.2157	0.0166432	0.153106	0.503272		12.4986	0.127675	0.453134	0.574406	0.738567	7.4747	0.311763	0.871965	0.456788	0.624174
ENSMUSG00000101462	Gm3052	4.84447	0.08432	0.301788	0.119137							5.81196	0.318076	0.617377	0.0851686		1.84538	0.231888	0.909566	0.482314
ENSMUSG00000102336	mmu-mir-5103	105.763	0.247259	0.267677	0.146434	0.375947	78.4157	-0.0337481	0.146373	0.542738	0.799398	124.117	0.472553	0.272763	0.0430686	0.111571	11.0433	0.014843	0.762614	0.977205	0.987527
ENSMUSG00000042111	Ccdc115	1335.27	-0.75498	0.111621	1.7531e-12	1.57925e-10	1478.28	-0.180714	0.105336	0.0301083	0.159309	1519.62	-0.695482	0.101182	2.3229e-12	4.44643e-11	683.663	-0.121757	0.297564	0.66365	0.786777
ENSMUSG00000101711	Gm28306	2.9582	-0.0523661	0.292824	0.196181		3.42118	-0.00999943	0.153731	0.454628		4.29655	-0.106765	0.496183	0.479755
ENSMUSG00000026127	Imp4	906.101	-0.768466	0.125085	1.00403e-10	6.62253e-09	1050.55	-0.0657484	0.10309	0.398969	0.700657	1018.07	-0.760467	0.117676	3.27737e-11	5.48203e-10	929.402	-0.777412	0.371198	0.0220122	0.0749111
ENSMUSG00000026126	Ptpn18	137.563	-0.141525	0.215503	0.3495	0.625801	137.283	-0.0206518	0.135738	0.752292	0.907398	140.133	-0.46939	0.25616	0.0349414	0.0940696	42.6204	-1.02581	0.535672	0.0232739	0.0779841
ENSMUSG00000100280	Gm28417	36.0319	0.496182	0.621197	0.0268845	0.117828	31.7002	0.0716559	0.172773	0.0833519		26.3668	0.0653513	0.391385	0.797714	0.89033	12.5281	0.437546	0.767297	0.374367	0.546483
ENSMUSG00000101223	4930568A12Rik	4.85277	0.0379795	0.286213	0.502628		4.13543	0.0070226	0.153335	0.64022		6.19352	0.174218	0.510178	0.335239
ENSMUSG00000026125	Prss39	4.16343	0.0225472	0.284603	0.671497							6.15137	0.164341	0.506394	0.356354
ENSMUSG00000037529	Prss40	4.4949	0.0012372	0.282857	0.984456		7.46593	0.0218938	0.154971	0.249862		8.15189	0.217114	0.518886	0.278409	0.460591
ENSMUSG00000045174	Amer3	4.69384	-0.0191418	0.283922	0.717469		4.83819	-0.00228619	0.152911	0.889174		3.86805	-0.155669	0.521809	0.243546
ENSMUSG00000103521	RP24-70I14.6	6.98094	0.0226773	0.281635	0.73044		7.75752	0.0134415	0.153388	0.499254		5.53382	-0.0703505	0.482407	0.6644
ENSMUSG00000104098	RP24-70I14.4	908.497	-0.0466183	0.114454	0.656032	0.847952	988.552	0.266279	0.122678	0.00573269	0.0506075	926.052	-0.322117	0.136209	0.0136162	0.0432367	56.0939	0.612582	0.792323	0.235854	0.403197
ENSMUSG00000037509	Arhgef4	79.1743	0.018141	0.222563	0.898182	0.962911	66.3751	-0.0429307	0.150898	0.419819	0.717793	105.479	0.401239	0.285641	0.0942764	0.206782	14.6334	-0.022724	0.634449	0.958137	0.976682
ENSMUSG00000037503	Fam168b	680.673	-0.108914	0.125617	0.33312	0.610536	661.369	-0.0290764	0.104354	0.705433	0.885772	759.068	-0.129882	0.125036	0.283416	0.46681	181.508	-0.225998	0.337158	0.470038	0.635727
ENSMUSG00000026123	Plekhb2	285.145	-0.0579157	0.164512	0.667471	0.853968	264.42	-0.0562039	0.131197	0.462702	0.746811	289.27	-0.352809	0.18407	0.0387734	0.102601	98.3593	0.295911	0.388406	0.402743	0.574421
ENSMUSG00000103760	RP23-348C6.7	3.05552	0.0448965	0.290613	0.27145
ENSMUSG00000102434	RP24-424K5.2	11.4506	-0.110472	0.309416	0.141504	0.367502	15.7571	-0.00460375	0.15112	0.869973		11.1741	-1.5509	1.40537	0.00997898	0.0333476	5.87085	2.19951	4.09871	0.0134922	0.0516193
ENSMUSG00000045216	Hs6st1	1997.04	0.00406817	0.0932812	0.964085	0.986805	1736.03	-0.200235	0.105817	0.0181002	0.112563	2337.82	0.129672	0.0943674	0.161813	0.311273	172.794	0.546878	0.376819	0.112679	0.24224
ENSMUSG00000102202	RP23-173H19.3	22.4674	0.131694	0.299684	0.254001	0.525176	13.4666	-0.0157805	0.152554	0.556493		20.9025	0.10914	0.415056	0.660016	0.799023
ENSMUSG00000037470	Uggt1	486.084	0.695172	0.170748	6.44543e-06	0.000134339	368.721	0.0901216	0.136571	0.277794	0.589261	730.516	1.36041	0.146804	2.79696e-21	1.30236e-19	213.423	-2.27973	0.431234	1.66323e-08	6.00337e-07
ENSMUSG00000047180	Neurl3	15.3579	0.0712488	0.28394	0.433712	0.700757	15.8068	0.0280841	0.155073	0.306526		18.7133	0.293943	0.496948	0.254906	0.433177
ENSMUSG00000037447	Arid5a	777.722	0.0987692	0.124591	0.379407	0.653434	841.254	0.394328	0.144392	0.000656434	0.0101128	1041.82	0.563011	0.12017	1.38532e-06	1.16714e-05	348.078	0.464994	0.330481	0.132538	0.271301
ENSMUSG00000010453	Kansl3	924.37	0.271829	0.125915	0.0166135	0.0829312	860.858	0.197132	0.124104	0.0326208	0.168247	1200.84	0.666462	0.109569	4.75057e-10	6.84566e-09	262.235	-1.20901	0.328736	8.84514e-05	0.0009499
ENSMUSG00000037432	Fer1l5	277.191	-0.0103532	0.168792	0.938168	0.97806	246.39	-0.0760909	0.140129	0.330612	0.640985	310.223	-0.0143701	0.178961	0.930769	0.965037	18.9047	-0.242813	0.644815	0.605409	0.745625
ENSMUSG00000001143	Lman2l	328.091	0.0547865	0.155201	0.676542	0.858516	304.252	0.00832556	0.119723	0.913444	0.968231	375.622	0.131984	0.161259	0.388304	0.57919	149.844	0.497921	0.461548	0.21715	0.380404
ENSMUSG00000037408	Cnnm4	634.53	0.229626	0.13548	0.0554547	0.198	505.867	-0.118453	0.132167	0.173773	0.462938	718.792	0.286529	0.137221	0.0297947	0.0821982	242.25	-0.682003	0.423596	0.069971	0.173335
ENSMUSG00000104316	RP23-294I17.4	84.9925	-0.756619	0.386857	0.00402133	0.0276687	77.5944	-0.897367	0.433727	0.00127521	0.0165109	93.3678	-0.950126	0.332663	0.000794739	0.00367772	38.242	0.537996	0.547753	0.233223	0.400051
ENSMUSG00000001138	Cnnm3	280.216	-0.419144	0.201539	0.00990881	0.0566409	249.165	-0.621244	0.23767	0.000477959	0.00800902	392.726	0.158791	0.170346	0.322851	0.512326	84.1677	-0.419046	0.42331	0.265217	0.435323
ENSMUSG00000067653	Ankrd23	3.79601	0.0149194	0.284091	0.772744		2.75435	-0.00185106	0.153385	0.871582		4.13978	0.0343494	0.482069	0.821835
ENSMUSG00000079610	Ankrd39	31.8955	-0.0920087	0.271348	0.450237	0.714575	32.4389	-0.0125126	0.148823	0.752562		35.0489	-0.235599	0.391317	0.37507	0.565977	28.4376	-2.53288	0.821144	0.000198111	0.00182918
ENSMUSG00000026121	Sema4c	165.353	0.318271	0.265833	0.0731664	0.238711	114.558	-0.0691482	0.15713	0.282611	0.594628	213.772	0.766315	0.250072	0.000636973	0.00302423	10.0016	0.427253	0.811136	0.37943	0.551367
ENSMUSG00000087589	D430040D24Rik	10.6289	0.0574832	0.283188	0.486376	0.742696	7.68394	-0.000821207	0.15239	0.965528		10.6017	0.084957	0.452945	0.693064	0.822685
ENSMUSG00000046337	Fam178b	61.9884	0.101774	0.249188	0.47337	0.731902	60.7642	0.0438659	0.153113	0.379873	0.683011	65.8791	0.0981275	0.313991	0.692594	0.822392	39.9496	-0.936244	0.652702	0.0638162	0.16216
ENSMUSG00000061518	Cox5b	705.314	0.323658	0.145188	0.0109855	0.0610031	687.472	0.377365	0.146179	0.00105904	0.0142299	651.989	-0.137602	0.132661	0.281228	0.464275	559.75	-0.263491	0.460244	0.508607	0.667349
ENSMUSG00000037351	Actr1b	99.0459	0.310655	0.28963	0.0844952	0.262093	83.3108	0.0403197	0.147412	0.485468	0.761724	153.95	1.1893	0.267972	1.36599e-06	1.15353e-05	46.55	-0.698214	0.515479	0.106585	0.232998
ENSMUSG00000102416	RP23-247A1.6	38.8526	-0.131399	0.280249	0.322074	0.600049	34.2714	-0.0564509	0.162565	0.179987		42.3905	-0.332414	0.392591	0.226213	0.397495	6.14244	0.585602	0.837755	0.249243	0.417834
ENSMUSG00000026117	Zap70	10.1033	0.0849773	0.294131	0.289346	0.565268	6.39895	0.000925378	0.152618	0.964014		15.0489	0.649302	0.790088	0.0529593	0.131621	19.5962	-0.00121421	0.699048	0.994027	0.996265
ENSMUSG00000026116	Tmem131	1003.18	-0.00305388	0.113013	0.975495	0.99077	956.326	0.0118159	0.0957072	0.875803	0.955663	1100.48	-0.0546248	0.114654	0.623584	0.774861	71.0868	0.184294	0.448327	0.642595	0.771735
ENSMUSG00000102930	RP23-328J8.2	8.69873	0.199419	0.389292	0.0145455		2.78322	0.006185	0.153475	0.628458		3.197	0.0660224	0.491291	0.634948		1.80738	0.161555	0.928642	0.496181
ENSMUSG00000103159	RP23-328J8.3	5.61757	0.00895776	0.281803	0.884534		3.52233	-0.0106355	0.15377	0.434318		5.69707	-0.0156859	0.470692	0.924972
ENSMUSG00000050122	Vwa3b	20.4282	0.0865559	0.280502	0.424991	0.693224	13.2211	-0.0177806	0.152887	0.50667		22.8644	0.200184	0.443946	0.429021	0.617236	10.482	-0.457346	0.767838	0.351762	0.526299
ENSMUSG00000026114	Cnga3	39.2888	0.102314	0.276592	0.401627	0.673577	31.4634	0.00254735	0.149293	0.946161		32.9535	-0.136738	0.395586	0.589568	0.74992	1.65517	-0.00786573	0.886114	0.976563
ENSMUSG00000026113	Inpp4a	1642.45	-0.219528	0.10843	0.0282669	0.122078	1685.57	0.000302568	0.0893194	0.997683	0.999037	1851.3	-0.209621	0.0972945	0.0277944	0.0776351	551.077	0.209398	0.320491	0.488742	0.651144
ENSMUSG00000026112	Coa5	187.431	-0.220309	0.206803	0.154715	0.388645	168.237	-0.205349	0.248351	0.0473744	0.214323	203.341	-0.378755	0.222865	0.0576632	0.140839	91.9909	0.124842	0.349551	0.701896	0.813851
ENSMUSG00000026111	Unc50	3484.49	-0.0907812	0.0841285	0.258192	0.529862	3619.94	0.135383	0.0835887	0.0573696	0.239569	3470.64	-0.454492	0.101969	5.02349e-06	3.83957e-05	3847.31	1.13747	0.289987	3.78874e-05	0.00047799
ENSMUSG00000026110	Mgat4a	1582.04	0.0381752	0.097948	0.679022	0.859612	1517.56	0.056074	0.0905767	0.447116	0.73692	1866.49	0.187713	0.0940865	0.0422511	0.109904	752.195	0.750773	0.402588	0.0392841	0.113857
ENSMUSG00000103948	RP23-285H9.2	6.72431	-0.00305834	0.28016	0.960177		5.3024	-0.0076617	0.153165	0.647778		9.60395	0.130123	0.469277	0.539062	0.710289	3.03684	0.932502	1.67975	0.0217467	0.0742508
ENSMUSG00000026090	2010300C02Rik	137.578	1.09399	0.294831	1.5125e-05	0.000280021	91.9312	0.0822624	0.166063	0.201704	0.496906	191.681	1.58724	0.264287	2.13875e-10	3.22966e-09	8.42129	-1.22304	1.16467	0.0526254	0.140864
ENSMUSG00000104365	RP23-402K6.2	2.7714	0.0576602	0.294843	0.128083
ENSMUSG00000102650	RP23-21P10.1	4.65564	0.0549727	0.291471	0.277594							4.27561	0.125547	0.503198	0.402596
ENSMUSG00000060771	Tsga10	1170.82	-0.297259	0.126963	0.00926126	0.0536966	1169.2	-0.10282	0.110824	0.209337	0.506126	1240.68	-0.496282	0.120819	2.19919e-05	0.000147415	101.998	1.52297	0.566176	0.00173327	0.0105595
ENSMUSG00000097268	Gm26805	4.28724	0.0271739	0.284874	0.615749		2.83966	-0.00168574	0.153285	0.893116		10.0472	0.614884	0.92883	0.0392002	0.103446	6.87294	-0.209776	0.796797	0.630414	0.763047
ENSMUSG00000037216	Lipt1	348.074	-0.124719	0.168002	0.362967	0.638647	339.37	-0.032018	0.121696	0.673356	0.867753	318.441	-0.827493	0.192825	4.63562e-06	3.57326e-05	34.8784	0.424795	0.54876	0.343729	0.518074
ENSMUSG00000026088	Mitd1	146.705	-0.74976	0.282567	0.000771354	0.00739359	152.506	-0.215256	0.260848	0.0423797	0.198683	149.963	-1.21406	0.27075	9.77043e-07	8.48814e-06	52.6381	0.251306	0.577834	0.584446	0.729934
ENSMUSG00000026087	Mrpl30	88.7655	0.0761885	0.223654	0.602612	0.818622	89.2589	0.0609883	0.153682	0.326202	0.636658	95.2811	0.0384344	0.270648	0.868427	0.931799	179.477	-0.0164524	0.429041	0.962485	0.978872
ENSMUSG00000061584	Lyg2	4.44186	0.0272768	0.284435	0.629731		3.72991	0.00329234	0.15322	0.817436		4.0977	0.020147	0.479761	0.898732
ENSMUSG00000087374	Gm15457	20.0322	-0.0102184	0.266498	0.917474	0.971274	21.2228	0.0102312	0.151026	0.742955		24.5071	0.058803	0.410225	0.810353	0.897281	2.79389	0.0183408	0.849535	0.961805	0.978627
ENSMUSG00000026085	Lyg1	2.86958	-0.010603	0.285235	0.80464							5.35902	0.104663	0.487895	0.537687
ENSMUSG00000058407	Txndc9	1556.56	-0.0764022	0.103017	0.426239	0.694357	1570	0.0662999	0.09043	0.36782	0.672256	1740.04	-0.0860155	0.107819	0.413219	0.602969	2167.85	0.331238	0.444832	0.401304	0.572806
ENSMUSG00000026083	Eif5b	9144.28	-0.163972	0.0837372	0.0383135	0.152798	9203.45	0.00456167	0.0672895	0.94123	0.978737	10307.2	-0.147881	0.0697558	0.0320448	0.0875613	1258.59	-0.358785	0.342034	0.257139	0.426712
ENSMUSG00000026082	Rev1	1968.27	-0.236506	0.110253	0.0197935	0.0941436	1964.15	-0.0691338	0.0910444	0.349353	0.655774	2211.81	-0.237506	0.0924062	0.00881939	0.0300356	191.973	0.0415756	0.319581	0.892064	0.940535
ENSMUSG00000037138	Aff3	1464.23	-0.0894029	0.100594	0.341538	0.61881	1442.93	0.0121003	0.088381	0.867836	0.952157	1561.12	-0.235757	0.0979582	0.013997	0.0441942	50.3283	0.215236	0.424039	0.570462	0.718322
ENSMUSG00000085391	Gm16150	3.56279	-0.0105496	0.283783	0.834817		4.05578	0.00176042	0.153212	0.900994		3.84386	-0.0389294	0.48362	0.792156		2.39382	0.391114	1.0466	0.0979021
ENSMUSG00000087131	Gm16152	3.64969	-0.028537	0.285821	0.56504		6.13355	0.00977051	0.153379	0.558821		2.9868	-0.178009	0.537887	0.157645
ENSMUSG00000048814	Lonrf2	437.547	-0.0172558	0.152151	0.892513	0.960615	423.004	0.01372	0.115268	0.8591	0.948635	470.174	-0.133811	0.150665	0.351099	0.541351	90.4181	-0.0339574	0.521945	0.934218	0.963014
ENSMUSG00000026080	Chst10	23.0641	-0.0133069	0.263161	0.899659	0.96375	27.3526	0.0316075	0.153703	0.398154		26.5462	-0.000973399	0.385678	0.994455	0.996902	7.91863	0.347191	0.775287	0.469489	0.635215
ENSMUSG00000026078	Pdcl3	150.026	-0.0833379	0.197	0.566163	0.796208	142.957	-0.0318451	0.137086	0.633438	0.845738	152.641	-0.375879	0.241326	0.0763834	0.175596	115.008	0.375928	0.404589	0.303527	0.476775
ENSMUSG00000103182	RP24-226L19.2	6.6418	0.101291	0.307556	0.114324		3.52095	0.0073904	0.153435	0.601385
ENSMUSG00000026077	Npas2	189.645	-0.17913	0.198042	0.23234	0.497346	170.079	-0.145494	0.1997	0.0929367	0.32307	193.416	-0.513677	0.22393	0.0108017	0.0356657	23.6636	1.43994	0.72538	0.0109306	0.0442933
ENSMUSG00000073702	Rpl31	347.026	-0.0366473	0.160785	0.78234	0.91138	357.539	0.0779423	0.131932	0.335142	0.643455	389.796	-0.0334085	0.169214	0.833019	0.910756	382.965	-0.638094	0.339232	0.0424148	0.120686
ENSMUSG00000003134	Tbc1d8	1574.49	-0.0800283	0.100844	0.395566	0.667993	1541.06	0.0049367	0.0929114	0.947876	0.981341	1672.45	-0.237333	0.10435	0.0197098	0.0585505	91.1133	0.27157	0.356373	0.4108	0.582137
ENSMUSG00000003135	Cnot11	1124.71	-0.854553	0.15301	2.35403e-09	1.19595e-07	1120.59	-0.648446	0.125283	1.56294e-08	1.69455e-06	1164.43	-1.21741	0.122476	3.91268e-24	2.26883e-22	97.4764	0.561083	0.424406	0.13852	0.279447
ENSMUSG00000085894	Gm15832	7.04487	0.0751836	0.295014	0.244542		5.67793	0.0141177	0.153828	0.410286		11.4118	0.608595	0.901911	0.0409195	0.107088	5.89463	1.02667	1.21382	0.0757721	0.182983
ENSMUSG00000048234	Rnf149	261.297	1.43964	0.216474	1.88492e-12	1.69017e-10	188.317	0.770369	0.289388	0.000352746	0.00618192	341.112	1.76006	0.202031	2.78985e-19	1.101e-17	138.194	0.285571	0.409255	0.439014	0.607838
ENSMUSG00000064936	Gm23722	7.81218	0.156546	0.346068	0.0283871							7.14927	0.432919	0.721331	0.058532	0.142512	1.76755	0.194458	0.901461	0.543507
ENSMUSG00000050967	Creg2	6.42192	0.00672386	0.281022	0.918439		12.3981	0.0422643	0.160688	0.0819556		10.2783	0.215173	0.501134	0.329535	0.519056
ENSMUSG00000097083	D930019O06Rik	4.51651	0.037007	0.28684	0.485021		3.736	0.00671812	0.15334	0.647633		6.41818	0.194874	0.523227	0.267028	0.447166	8.81593	0.533424	0.820956	0.283991	0.455931
ENSMUSG00000057173	Rfx8	6.99527	0.0167246	0.280158	0.810333		6.03222	0.0002186	0.152663	0.99347		8.22463	0.0727205	0.468136	0.707087	0.831114	2.40269	-0.0902636	0.884936	0.76523
ENSMUSG00000026074	Map4k4	2360.83	-0.00189805	0.0912397	0.981569	0.993078	2166.42	-0.066605	0.0865587	0.35422	0.660576	2706.45	0.0678761	0.0938104	0.460773	0.64632	71.8171	0.288312	0.463501	0.476624	0.641618
ENSMUSG00000026073	Il1r2	13.1167	0.0525111	0.279057	0.559306	0.792406	9.40671	-0.00612758	0.152293	0.783867		9.20774	-0.199431	0.496916	0.35059	0.540986	2.32093	0.221428	0.946088	0.367433
ENSMUSG00000097899	Gm16894	6.60914	-0.0304001	0.282823	0.63782		6.96648	-0.00344877	0.152696	0.852591		5.64196	-0.244647	0.554541	0.170461		1.65694	0.188789	0.959962	0.279064
ENSMUSG00000026072	Il1r1	229.192	-0.157274	0.183422	0.275733	0.550557	241.36	0.0285122	0.12636	0.701536	0.884192	263.26	-0.129876	0.18554	0.449963	0.636636	50.3869	0.895049	0.464871	0.0280303	0.0892814
ENSMUSG00000103560	RP24-317P24.1	184.449	-0.0238626	0.183891	0.864717	0.949476	163.372	-0.0674455	0.146591	0.345846	0.653571	178.358	-0.433106	0.233367	0.0364815	0.09755	15.7863	-0.141844	0.575991	0.753158	0.850504
ENSMUSG00000070942	Il1rl2	18.673	0.143114	0.314686	0.179012	0.424939	8.63002	-0.0190721	0.154358	0.322055		18.3268	0.236627	0.469116	0.346733	0.537112
ENSMUSG00000026069	Il1rl1	5.79659	0.0710041	0.294442	0.24663		2.92697	0.000992083	0.153235	0.943087		5.17793	0.134839	0.497599	0.429828
ENSMUSG00000026070	Il18r1	10.1051	-0.0610443	0.284699	0.450031	0.714425	12.2107	0.00197443	0.151744	0.939669		12.9804	-0.0637559	0.437766	0.774218	0.876444	9.61893	0.780342	1.28258	0.0753789	0.1823
ENSMUSG00000026068	Il18rap	64.0799	-0.155077	0.272039	0.290469	0.566118	61.5757	-0.0511005	0.155016	0.32828	0.638991	77.582	-0.133848	0.310202	0.583885	0.745542	33.9084	0.911567	0.581082	0.0540762	0.143716
ENSMUSG00000026065	Slc9a4	97.3597	-0.0681575	0.2184	0.637947	0.838268	91.3113	-0.0289731	0.143718	0.614152	0.836646	91.3932	-0.592145	0.32784	0.0257264	0.0728128	8.16702	0.317399	0.740969	0.510248	0.668667
ENSMUSG00000102676	RP23-346B12.4	4.44096	0.0266737	0.284655	0.628953							4.2028	0.0258927	0.480175	0.869206
ENSMUSG00000026062	Slc9a2	13.5629	0.186947	0.360623	0.0609106	0.210739	4.39206	-0.0121334	0.1538	0.418721		6.65431	-0.0446198	0.468765	0.802604	0.893116
ENSMUSG00000103679	RP23-413K6.3	10.5291	0.0381509	0.279973	0.629169	0.832645	6.74558	-0.00964164	0.153143	0.599205		12.0798	0.139847	0.463091	0.529835	0.70386	4.33651	0.535566	0.970495	0.237325	0.404794
ENSMUSG00000103270	RP23-413K6.4	7.87481	-0.020378	0.279494	0.774726		8.57644	0.00194623	0.152393	0.928405		7.18149	-0.174488	0.500187	0.368879	0.559949
ENSMUSG00000041945	Mfsd9	101.831	-0.140858	0.23832	0.352104	0.628097	100.4	-0.0305398	0.143611	0.599852	0.83126	109.358	-0.330298	0.292118	0.169826	0.322465	10.7248	0.181435	0.765478	0.693383	0.807757
ENSMUSG00000079588	Tmem182	401.021	-0.0346152	0.144333	0.78054	0.910318	397.575	0.0401206	0.117453	0.607109	0.8341	392.597	-0.430601	0.163154	0.00513523	0.018936	300.221	1.13765	0.447621	0.00438723	0.0218721
ENSMUSG00000101877	Gm8176	14.242	0.0228429	0.273788	0.799507	0.919402	11.0765	-0.00955021	0.152349	0.685819		16.8601	0.110159	0.437579	0.639511	0.785526	4.08282	-1.21156	1.81021	0.0405312	0.116604
ENSMUSG00000101299	Gm28175	24.501	-0.0667527	0.274085	0.528795	0.772643	27.734	0.00683868	0.150054	0.843223		24.8125	-0.321503	0.469591	0.239835	0.414633	1.86228	0.153243	0.886648	0.640477
ENSMUSG00000100180	Gm28140	14.5591	-0.0859351	0.287976	0.36232	0.638308	18.706	0.00655784	0.15181	0.80106		20.5274	0.0110562	0.405895	0.966308	0.982851
ENSMUSG00000060424	Pantr1	5.70709	-0.0358362	0.284201	0.566418		8.91902	0.0157728	0.15337	0.481035		6.71578	-0.0857212	0.474544	0.637916	0.784675	3.54373	0.937382	1.40344	0.0688775	0.171478
ENSMUSG00000045515	Pou3f3	33.1726	0.131277	0.288643	0.302263	0.579794	28.3622	0.0194916	0.15087	0.597836		69.0263	1.66309	0.458072	2.6047e-05	0.000171894	32.5858	2.69814	0.879986	0.000221631	0.00200185
ENSMUSG00000093436	Gm20646	21.673	-0.0135014	0.26526	0.893794	0.961164	25.1627	0.023892	0.152447	0.486761		25.3852	0.00917006	0.39567	0.972841	0.985673	7.52123	1.30213	1.32969	0.0477894	0.131034
ENSMUSG00000060679	Mrps9	252.225	-0.146238	0.186655	0.312345	0.590158	248.504	-0.0318182	0.127804	0.664949	0.862683	274.442	-0.263545	0.212409	0.169468	0.322009	88.5227	-0.235987	0.472854	0.559984	0.709543
ENSMUSG00000041907	Gpr45	11.2983	0.132864	0.3192	0.12336	0.335242	4.98804	-0.00369594	0.153022	0.816772		8.0014	0.0943745	0.467878	0.636765	0.784285	3.91208	0.340492	0.92395	0.368211	0.540719
ENSMUSG00000070939	Tgfbrap1	3031.96	-0.100368	0.0877381	0.228574	0.493168	2888.59	-0.069164	0.0805233	0.313331	0.624817	3315.84	-0.171626	0.0896021	0.0509273	0.127489	311.067	0.604992	0.411967	0.10171	0.224996
ENSMUSG00000010290	AI597479	563.885	-0.22377	0.156806	0.0914632	0.276307	566.159	-0.0456546	0.114706	0.559812	0.808956	599.594	-0.407693	0.149648	0.0042032	0.0159286	268.803	-0.55829	0.292418	0.0435016	0.122825
ENSMUSG00000008136	Fhl2	14.4441	0.0686997	0.282634	0.455675	0.719595	12.8591	0.0137293	0.152534	0.592653		15.1555	0.139747	0.444034	0.554746	0.722506	6.15711	0.691972	0.983396	0.173877	0.325526
ENSMUSG00000094497	Gm8210	51.0692	0.0430927	0.242904	0.749766	0.894085	53.394	0.0456111	0.153834	0.362198	0.667542	45.5357	-0.332546	0.384214	0.224211	0.394932
ENSMUSG00000099576	Gm29040	9.55697	-0.0679959	0.287976	0.385052	0.658379	13.1229	0.00921792	0.151883	0.728438		16.4913	0.151558	0.441874	0.530408	0.704436	9.34546	-2.16792	1.35519	0.0084749	0.0362457
ENSMUSG00000066877	Nck2	58.6388	0.0743774	0.243281	0.59365	0.812039	57.9152	0.0410936	0.151422	0.421103	0.718666	69.0664	0.246028	0.318908	0.330256	0.519712	12.1777	0.895421	0.853813	0.104806	0.230327
ENSMUSG00000103945	RP23-435E15.3	5.02261	-0.0392879	0.286405	0.482721		7.85683	0.00977972	0.153012	0.618241		8.26516	0.053284	0.468352	0.775903	0.877237	2.02531	0.279282	0.950394	0.3421
ENSMUSG00000057363	Uxs1	1456.47	-0.067081	0.100308	0.474464	0.732368	1447.72	0.0457144	0.0887306	0.527562	0.788987	1487.85	-0.344123	0.107766	0.0010464	0.00470902	216.715	0.579737	0.406567	0.113399	0.243309
ENSMUSG00000090243	Gm16103	2.59772	-0.0329187	0.28792	0.437664		3.25509	-0.00211241	0.153316	0.864939		3.18565	-0.0856775	0.495361	0.537834		1.7885	0.103422	0.89616	0.718551
ENSMUSG00000100701	Gm19587	8.93578	0.00420858	0.278833	0.955889	0.984179	9.20652	0.00576187	0.152278	0.801306		9.87886	0.00191208	0.448776	0.995474	0.997539	2.12495	0.222464	0.924196	0.451953
ENSMUSG00000041763	Tpp2	907.933	-0.0385063	0.11696	0.717463	0.879174	867.246	-0.0100072	0.0984459	0.893369	0.962429	1055.31	0.0674002	0.114282	0.54578	0.715438	350.41	0.0360219	0.389281	0.922209	0.956644
ENSMUSG00000047343	Mettl21c	5.01514	0.0107918	0.282874	0.850586		3.46405	-0.0055537	0.15339	0.67436		10.689	0.384639	0.625148	0.115648	0.242341
ENSMUSG00000091844	Gm8251	258.255	2.43945	0.241413	3.12105e-25	9.79505e-23	70.3257	-0.0198195	0.144079	0.709401	0.887855	497.365	3.35914	0.185376	2.30919e-74	1.04611e-71	8.10014	0.606183	1.05395	0.169037	0.319516
ENSMUSG00000026049	Tex30	224.127	-0.461429	0.26477	0.015513	0.0789984	212.271	-0.371312	0.291274	0.012169	0.0873735	306.883	0.0294186	0.182987	0.864303	0.929361	840.362	0.829587	0.403383	0.023059	0.0775422
ENSMUSG00000026047	Kdelc1	70.4075	-0.766015	0.444823	0.00580403	0.0371863	72.6532	-0.112734	0.19912	0.0704802	0.272424	74.9332	-1.13833	0.39561	0.000515555	0.00251362	14.5197	-0.0756021	0.631771	0.868546	0.924784
ENSMUSG00000041684	Bivm	365.656	-0.0731344	0.152316	0.57068	0.798328	370.098	0.0409646	0.121155	0.597564	0.830518	417.132	-0.0367196	0.161817	0.809051	0.896815	142.282	1.04804	0.37832	0.00258789	0.0144867
ENSMUSG00000026048	Ercc5	87.1503	0.826287	0.397451	0.00275205	0.0205406	83.2274	0.795373	0.428188	0.002123	0.0242538	104.833	1.06326	0.349293	0.00036172	0.00183604	18.452	-0.738368	0.642188	0.134086	0.273362
ENSMUSG00000056870	Gulp1	41.7651	-0.0945483	0.26147	0.473661	0.732049	42.9671	-0.00746722	0.146767	0.864979		54.4539	0.0612562	0.334827	0.809605	0.896988	3.99126	0.380722	0.932897	0.334603	0.50912
ENSMUSG00000103071	RP24-541P18.1	376.599	-0.0970103	0.15008	0.448912	0.71358	353.737	-0.0583349	0.130695	0.448816	0.738386	396.74	-0.288327	0.167235	0.0664627	0.15788	28.7804	-0.179687	0.497184	0.667635	0.789538
ENSMUSG00000026042	Col5a2	4.49663	-0.0256152	0.284219	0.643904		2.58171	-0.0164928	0.154985	0.0434375		5.94922	-0.0144454	0.476289	0.925395
ENSMUSG00000100843	Gm8307	4.41188	0.00477502	0.283122	0.93176		3.89784	-0.00107647	0.153144	0.93723
ENSMUSG00000025995	Wdr75	603.832	0.226872	0.150659	0.0799117	0.252915	607.716	0.336663	0.168149	0.00514487	0.0467474	877.139	0.88488	0.139726	6.37696e-11	1.03098e-09	794.11	-1.65366	0.447619	4.77862e-05	0.00057904
ENSMUSG00000084817	Gm5526	4.22907	0.0175123	0.283522	0.752101		5.09839	0.011764	0.153625	0.472054		6.68997	0.20205	0.515956	0.296263	0.482395	3.08877	0.230312	0.879905	0.537792	0.691547
ENSMUSG00000025993	Slc40a1	104.063	-0.0813272	0.225835	0.575741	0.801343	81.2611	-0.179704	0.296344	0.0270643	0.147756	120.981	-0.0406706	0.267772	0.856435	0.92485	151.074	1.95735	0.423619	6.76812e-07	1.57002e-05
ENSMUSG00000099432	Gm18849	12.5845	0.1133	0.306064	0.19147	0.441895	7.72681	0.00332351	0.1524	0.876888		9.21585	0.0402303	0.453315	0.846577	0.918971	8.60366	-6.68639	2.96772	7.50957e-05	0.000834263
ENSMUSG00000041144	Dnah7b	902.788	-0.330574	0.129948	0.0046445	0.0312168	921.529	-0.0820836	0.104577	0.299201	0.613046	970.788	-0.479133	0.119026	3.28703e-05	0.000212033	123.042	0.42813	0.335581	0.17194	0.322962
ENSMUSG00000101337	Dnah7c	3079.01	-0.37084	0.0887557	1.15178e-05	0.000220367	3035.59	-0.221702	0.0877024	0.00334403	0.0341523	3155.62	-0.685874	0.0907354	1.50399e-14	3.66229e-13	609.19	0.602801	0.393972	0.0920198	0.209612
ENSMUSG00000025986	Slc39a10	6276.98	-0.305248	0.0848254	0.000161292	0.00202217	6332.64	-0.0965616	0.0817484	0.165012	0.448886	6902.26	-0.370205	0.0751932	6.32745e-07	5.70678e-06	1539.66	0.538626	0.269868	0.0368998	0.10894
ENSMUSG00000100213	Gm28151	8.82078	0.0213411	0.278734	0.777579	0.909008	17.7872	0.0693608	0.175169	0.019114		10.301	0.0896395	0.457109	0.671934	0.807651	3.02724	0.0206358	0.848561	0.95715	0.975941
ENSMUSG00000101447	Gm28826	161.621	-0.962408	0.26543	2.32731e-05	0.000405414	236.333	0.150567	0.17799	0.10434	0.344299	149.54	-2.11808	0.277299	1.78774e-15	4.81715e-14	16.7388	-2.43612	1.49689	0.00595844	0.027735
ENSMUSG00000081185	Gm4852	3.24184	0.00693242	0.284094	0.888887		2.65729	-0.00099173	0.153287	0.93587		3.74843	0.0334107	0.48241	0.826812
ENSMUSG00000100033	Gm8337	3.72524	-0.0135862	0.283928	0.789176		3.81254	-0.00165439	0.153099	0.908744		4.57159	-0.0121177	0.477058	0.936749
ENSMUSG00000094968	Gm22419	24.537	-0.309886	0.473244	0.0453064	0.172216	30.0939	-0.0158628	0.150108	0.667682		23.477	-1.60322	0.811401	0.00303338	0.0119643
ENSMUSG00000096973	Gm5974	3.07767	0.0377148	0.288358	0.401367		3.11586	0.0113148	0.153937	0.369184
ENSMUSG00000101760	Gm8384	7.79272	-0.174713	0.366416	0.0118177		13.715	-2.33359e-05	0.151896	0.99614		8.32305	-3.86452	1.79542	0.00211369	0.00873474
ENSMUSG00000100816	Gm28321	3.08894	-0.0197594	0.285222	0.675341		2.88635	-0.00462809	0.153465	0.693367		3.6902	-0.0423955	0.484072	0.773976
ENSMUSG00000026109	Tmeff2	92.6624	-0.0951264	0.239231	0.507429	0.758221	84.6471	-0.0511669	0.153669	0.34928	0.655774	107.258	-0.0944521	0.288921	0.688469	0.819956	165.462	1.2663	0.442523	0.00140721	0.00897357
ENSMUSG00000101702	1700072G22Rik	10.2002	-0.028599	0.278184	0.715418	0.877995	6.55	-0.0263036	0.156443	0.0956887		24.517	0.931563	0.71461	0.0211951	0.0620891
ENSMUSG00000026107	Nabp1	2086.32	-0.41623	0.125699	0.000292041	0.00331343	2149.09	-0.124025	0.108865	0.131794	0.396587	2345.51	-0.42114	0.110245	8.74501e-05	0.000515612	446.41	-0.541867	0.404951	0.135855	0.275556
ENSMUSG00000099413	Gm17767	269.623	-0.132115	0.175058	0.346056	0.623363	272.748	0.00353468	0.130979	0.96053	0.986559	266.534	-0.539428	0.197559	0.00303082	0.0119567	95.1061	1.6559	0.669444	0.00264725	0.0147436
ENSMUSG00000018417	Myo1b	1471.28	0.00374659	0.100584	0.969159	0.988255	1485.32	0.132585	0.105534	0.10539	0.346464	1820.36	0.275479	0.0963463	0.00355433	0.0137159	350.721	-1.52432	0.292457	5.05576e-08	1.6326e-06
ENSMUSG00000101724	Gm29453	4.5566	-0.0155336	0.283744	0.765294		2.96288	-0.0141827	0.154358	0.238445		6.84687	0.0760667	0.472439	0.683241	0.815785
ENSMUSG00000062939	Stat4	579.822	0.114741	0.136136	0.339067	0.616307	556.001	0.0996696	0.124806	0.237711	0.543555	621.364	0.0278467	0.132459	0.828859	0.908399	157.921	2.55399	0.465288	4.28411e-09	1.78379e-07
ENSMUSG00000109599		6.91017	0.0297493	0.28227	0.657453		2.87574	-0.0158071	0.154746	0.132643		6.87423	0.0378258	0.467262	0.83972	0.914632	1.95076	0.119062	0.89637	0.683718
ENSMUSG00000026104	Stat1	23.1059	-0.126471	0.295076	0.275887	0.550557	19.5174	-0.0508488	0.162866	0.113457		42.174	0.439388	0.42038	0.130561	0.265878	10.7519	1.7474	1.03389	0.0127359	0.0495059
ENSMUSG00000026103	Gls	1189.93	-0.560146	0.134124	5.83579e-06	0.000124102	1198.45	-0.293419	0.155188	0.00814149	0.0655246	1538.44	-0.116648	0.104352	0.252758	0.43067	371.642	1.44468	0.458788	0.000453558	0.00360551
ENSMUSG00000002881	Nab1	2812.04	-0.246895	0.0896379	0.00363255	0.0255552	2749.89	-0.130403	0.0846063	0.0672139	0.264282	3240.56	-0.166072	0.0862732	0.0507049	0.127084	293.159	0.552773	0.385992	0.115538	0.246149
ENSMUSG00000100007	Gm5527	7.30631	-0.0210932	0.280257	0.758479		8.38757	0.0050686	0.152359	0.818646		6.60102	-0.170078	0.502375	0.365409	0.556382
ENSMUSG00000043015	Tmem194b	30.4866	-0.0143998	0.25959	0.896208	0.961908	20.6174	-0.0595121	0.16763	0.0670861		27.4924	-0.36887	0.47537	0.190966	0.35138	9.20924	0.577048	0.906231	0.245169	0.413237
ENSMUSG00000041439	Mfsd6	858.492	-0.0925117	0.123618	0.405786	0.677678	824.777	-0.0371512	0.103784	0.630434	0.84469	912.067	-0.253167	0.127963	0.0402893	0.10583	100.37	0.445514	0.424585	0.239976	0.407856
ENSMUSG00000026102	Inpp1	23.9775	0.411883	0.659052	0.0265243	0.116794	16.036	0.0259527	0.154082	0.380461		24.5346	0.655151	0.624656	0.0561614	0.137867	23.3212	-0.578405	0.668598	0.241085	0.409072
ENSMUSG00000041426	Hibch	17.7309	0.297405	0.509061	0.0241535	0.109348	10.4818	0.0195082	0.153867	0.403379		16.1808	0.529065	0.669381	0.0837859	0.188918	22.5495	-2.77385	0.936072	0.000247146	0.00219833
ENSMUSG00000043629	1700019D03Rik	92.106	-0.212845	0.259471	0.188461	0.437284	95.4922	-0.025632	0.141461	0.667847	0.863438	116.659	-0.0324279	0.256012	0.881353	0.938818	46.9403	1.11153	0.503286	0.0104719	0.0427673
ENSMUSG00000060715	1700019A02Rik	6.67784	-0.0292241	0.282168	0.656147		6.45539	-0.0063731	0.15284	0.73234		8.40255	-0.0131357	0.460012	0.942806	0.969667	4.65845	0.00547105	0.80102	0.992495	0.995423
ENSMUSG00000026098	Pms1	537.855	-0.200482	0.142143	0.105295	0.303306	503.054	-0.177139	0.146175	0.0653106	0.259421	576.567	-0.359564	0.140053	0.00731558	0.0255341	41.0578	-0.660126	0.559412	0.146772	0.290669
ENSMUSG00000026097	Ormdl1	12.972	0.0938896	0.294599	0.289559	0.565517	9.84702	0.00917757	0.152448	0.692433		16.7872	0.460641	0.602582	0.112659	0.23745	16.4434	-0.644584	0.845917	0.209956	0.371948
ENSMUSG00000026096	Osgepl1	269.163	-0.135063	0.179004	0.340157	0.617679	271.355	-0.003841	0.125145	0.956417	0.984457	281.503	-0.367447	0.213165	0.0559496	0.137394	82.5998	0.352299	0.450733	0.373273	0.545369
ENSMUSG00000026095	Asnsd1	91.0476	0.0677588	0.223245	0.6416	0.840069	93.944	0.0741965	0.160413	0.246504	0.554775	108.493	0.251328	0.279523	0.284981	0.468859	61.2449	0.937328	0.5797	0.0475821	0.130657
ENSMUSG00000096141	Dnah7a	316.252	-0.108521	0.159943	0.415142	0.684825	337.761	0.0904421	0.13398	0.276477	0.58803	352	-0.146654	0.172179	0.361912	0.552922	45.5965	0.25146	0.453348	0.528212	0.683729
ENSMUSG00000026094	Stk17b	168.573	-0.298639	0.235146	0.0758683	0.244048	189.395	0.0224995	0.130241	0.7522	0.907398	252.816	0.355993	0.195038	0.0475341	0.120723	351.983	1.43283	0.283771	1.38373e-07	3.98637e-06
ENSMUSG00000042807	Hecw2	420.339	0.0697467	0.149958	0.587371	0.807817	364.427	-0.069861	0.128711	0.382471	0.685613	458.009	0.0251564	0.161748	0.870928	0.933499	103.923	0.71689	0.388833	0.0425788	0.120998
ENSMUSG00000025983	Ccdc150	51.8663	-0.0409658	0.241039	0.75885	0.898098	47.6283	-0.0231628	0.147959	0.622131		61.9947	0.0408428	0.310322	0.86975	0.932763	6.44748	-0.390639	0.868725	0.376871	0.548781
ENSMUSG00000041303	Gtf3c3	643.487	-0.355198	0.142872	0.00491119	0.0326373	726.855	0.0734198	0.11093	0.363499	0.668466	759.508	-0.21624	0.128208	0.080474	0.183102	227.659	-1.39795	0.42259	0.00026904	0.00236161
ENSMUSG00000109809		3.5128	0.0256993	0.285775	0.598657							3.67244	0.0664096	0.4876	0.658256
ENSMUSG00000073678	Pgap1	146.946	-0.0975384	0.207264	0.508425	0.758804	139.998	-0.0369094	0.141726	0.560396	0.809241	170.73	-0.0564894	0.219879	0.774052	0.876414	47.9252	0.220583	0.465499	0.587699	0.7324
ENSMUSG00000104136	RP24-290F15.1	3.05552	0.0448965	0.290613	0.27145							2.28826	0.068375	0.500659	0.530974
ENSMUSG00000052331	Ankrd44	30141.7	-0.433818	0.082957	5.21742e-08	1.88422e-06	29225.9	-0.345547	0.0748715	5.59225e-07	3.34603e-05	33344.2	-0.478967	0.0693094	2.87152e-12	5.44387e-11	3039.44	0.544296	0.301507	0.0542785	0.144113
ENSMUSG00000102642	RP23-68O7.2	21.0103	-0.0110686	0.266086	0.911551	0.968731	20.2248	-0.00010739	0.150187	0.994807		19.5587	-0.243858	0.460083	0.338606	0.528608
ENSMUSG00000025982	Sf3b1	8819.92	-0.564716	0.0916857	1.4803e-10	9.50616e-09	8562.17	-0.469949	0.0831724	1.62304e-09	2.18502e-07	9749.95	-0.613972	0.0803581	9.88199e-15	2.46427e-13	1499.07	-0.836146	0.292176	0.00247857	0.0139991
ENSMUSG00000025981	Coq10b	1050.61	-0.858152	0.118365	4.50764e-14	4.95535e-12	1105.68	-0.43517	0.119821	2.8032e-05	0.000822018	1126.05	-1.04645	0.111989	1.75189e-21	8.26354e-20	795.644	0.739206	0.358604	0.0247876	0.0814362
ENSMUSG00000101122	Gm17971	4.27158	-0.00216662	0.283027	0.965104		5.02933	0.0050008	0.153129	0.75217		4.88682	-0.00875771	0.476541	0.953665		9.26733	0.833497	0.948545	0.130712	0.26877
ENSMUSG00000025980	Hspd1	2310.52	-0.220118	0.105432	0.0242807	0.109771	2167.27	-0.224731	0.0997847	0.00644546	0.0553328	2411.04	-0.456416	0.0916234	3.86223e-07	3.61845e-06	541.503	0.148489	0.248103	0.536363	0.690137
ENSMUSG00000073676	Hspe1	789.67	-0.239572	0.137839	0.0482382	0.179915	789.593	-0.0635616	0.107137	0.42161	0.7193	781.358	-0.675596	0.129362	6.78877e-08	7.21514e-07	286.873	1.06371	0.42954	0.00575226	0.0269819
ENSMUSG00000089670	Gm16581	11.0263	-0.0950573	0.296575	0.262642	0.534862	14.3325	0.00257063	0.151203	0.928451		13.4721	-0.182172	0.463625	0.436602	0.624229
ENSMUSG00000025979	Mob4	701.277	-0.410487	0.134451	0.000701307	0.00684283	704.958	-0.176105	0.128844	0.055785	0.235946	747.175	-0.600876	0.128288	1.26166e-06	1.07377e-05	875.933	0.723517	0.534441	0.106181	0.232412
ENSMUSG00000025978	Rftn2	50.1249	0.0502911	0.244577	0.709162	0.874952	44.6288	-0.00109941	0.146416	0.978271		59.1534	0.184961	0.328417	0.466423	0.651362	25.4084	0.740556	0.575062	0.112085	0.241378
ENSMUSG00000097649	Gm10561	2.98862	0.00534064	0.284575	0.908908		2.90262	0.00173569	0.153303	0.892838		4.10593	0.0575746	0.491375	0.670979
ENSMUSG00000046994	Mars2	470.021	-0.0233043	0.138728	0.846632	0.941354	387.055	-0.340793	0.190051	0.00730462	0.0608785	560.47	0.147154	0.148013	0.298971	0.485558	223.157	-0.249396	0.339477	0.427353	0.597578
ENSMUSG00000025977	Boll	13.6935	0.0118617	0.273856	0.894028	0.961164	11.4095	-0.00586531	0.152152	0.799834		18.4106	0.18391	0.451579	0.453092	0.639811	4.01725	0.821953	1.15095	0.11527	0.245887
ENSMUSG00000038349	Plcl1	319.248	-0.204611	0.182512	0.15818	0.393509	314.062	-0.0621086	0.13004	0.424696	0.721219	405.77	0.0964515	0.159638	0.524887	0.700396	27.295	1.64952	1.10557	0.0181598	0.0645135
ENSMUSG00000099950	9130227L01Rik	178.996	-0.138714	0.20024	0.350392	0.62659	173.397	-0.0427656	0.136962	0.5414	0.798009	196.658	-0.230595	0.219438	0.243099	0.418542	37.894	-1.56915	0.59955	0.00194285	0.0115237
ENSMUSG00000045336	Hsfy2	6.01846	0.139139	0.334717	0.0242655							2.40788	0.101111	0.505725	0.404756
ENSMUSG00000038331	Satb2	1584.83	-0.112935	0.0998076	0.226455	0.490763	1566.46	0.000471526	0.0883917	0.995758	0.998539	1723.54	-0.204926	0.0976582	0.0321532	0.0877365	102.824	0.278466	0.465975	0.493997	0.654998
ENSMUSG00000087022	9130024F11Rik	54.8633	-0.336157	0.392975	0.0670661	0.225891	57.0014	-0.0559127	0.157263	0.288258	0.601443	55.13	-1.01008	0.437706	0.00310144	0.01218	12.2736	1.5806	1.30404	0.0240066	0.0796543
ENSMUSG00000094128	Gm23943	7.29973	-0.00418979	0.279162	0.949427		8.4442	0.00785518	0.15282	0.694411		6.95995	-0.102899	0.477202	0.57862	0.742123
ENSMUSG00000097519	4930558J18Rik	29.9279	0.0374221	0.260221	0.750144	0.894176	33.4773	0.0441139	0.157129	0.277642		38.694	0.301019	0.409244	0.275324	0.456723	4.34076	0.119146	0.835189	0.764959	0.858181
ENSMUSG00000038323	1700066M21Rik	948.007	-0.0766884	0.116409	0.470311	0.730002	918.978	-0.0141131	0.0961039	0.849965	0.945674	1097.2	0.00705655	0.112382	0.949651	0.973937	285.385	0.639075	0.299753	0.0241045	0.0798736
ENSMUSG00000048495	Tyw5	72.1514	0.0310649	0.231534	0.824801	0.931354	59.0694	-0.0411669	0.15175	0.412603	0.711918	77.4885	-0.00717726	0.298307	0.974208	0.986456	136.4	0.636504	0.48711	0.127931	0.264651
ENSMUSG00000025971	9430016H08Rik	11.868	-0.0439312	0.282156	0.560774	0.793135	14.4724	0.00545286	0.15131	0.847702		14.2014	-0.111756	0.44093	0.626386	0.776749	135.803	0.151172	0.408411	0.683198	0.801365
ENSMUSG00000102685	RP23-433B11.1	2.96952	0.0637664	0.296557	0.108639							2.24131	0.133959	0.521599	0.221472
ENSMUSG00000038305	Spats2l	24.575	0.242157	0.39127	0.0754412	0.243378	17.9924	0.0235795	0.153286	0.441912		30.1493	0.875418	0.620584	0.0223552	0.0650076	4.36202	-0.105192	0.843712	0.778355	0.867276
ENSMUSG00000091283	Gm17234	6.47198	-0.00563028	0.280568	0.92743		4.97994	-0.00921569	0.153334	0.574224		7.54379	0.0104895	0.459818	0.959261	0.979407
ENSMUSG00000054770	Kctd18	346.327	0.00286024	0.157411	0.98414	0.993896	334.648	0.0218401	0.121443	0.771186	0.916649	405.495	0.121182	0.160858	0.427504	0.616043	212.077	-1.06037	0.387114	0.00271747	0.0150544
ENSMUSG00000026039	Sgol2	1031.31	-0.789509	0.120144	6.07861e-12	5.03309e-10	1125.6	-0.241872	0.123925	0.0110867	0.0815802	1154.01	-0.797178	0.115564	1.53885e-12	2.99304e-11	281.993	0.678961	0.329917	0.0276718	0.0883656
ENSMUSG00000063558	Aox1	20.311	0.0667191	0.274562	0.530902	0.774387	14.6161	-0.0116026	0.151857	0.673048		32.7156	0.824069	0.576362	0.0248774	0.0708339
ENSMUSG00000064294	Aox3	6.6075	0.0152185	0.28118	0.814095		6.81465	0.00846113	0.152959	0.659223		5.69545	-0.0630882	0.476174	0.711761
ENSMUSG00000038242	Aox4	93.583	-0.217374	0.267794	0.182434	0.429238	91.2042	-0.0650661	0.156307	0.290806	0.603571	95.5976	-0.637246	0.324522	0.0166454	0.0509435	8.38177	-0.30678	0.734669	0.520522	0.677097
ENSMUSG00000089822	Gm15759	8.03425	0.149271	0.338413	0.0420294		2.66338	0.00215613	0.153329	0.864913		8.38147	0.539155	0.841786	0.0457656	0.117107
ENSMUSG00000079554	Aox2	37.6971	0.776426	0.668094	0.010938	0.0608093	23.0281	0.0153816	0.151184	0.642632		45.7304	1.18812	0.525013	0.00259355	0.0104516	3.47682	-0.656922	1.13994	0.121323	0.254845
ENSMUSG00000103839	RP24-191N24.2	19.2002	0.247814	0.415664	0.0508612	0.186376	12.2454	0.017067	0.152964	0.512184		18.1648	0.393138	0.549853	0.157596	0.305185	5.09261	0.44086	0.839412	0.354935	0.529011
ENSMUSG00000051223	Bzw1	5454.97	-0.0969814	0.0851175	0.231912	0.496889	5898.37	0.229423	0.092696	0.00362757	0.0364202	6458.14	0.0608766	0.0822133	0.454749	0.640988	4097.08	-0.300014	0.282179	0.262412	0.432389
ENSMUSG00000026034	Clk1	871.647	0.0530009	0.116447	0.619621	0.827835	888.07	0.187853	0.124334	0.0403878	0.1928	1055.52	0.268003	0.111742	0.0137943	0.0436873	572.865	-0.507223	0.334291	0.102551	0.226535
ENSMUSG00000026035	Ppil3	37.9442	0.170455	0.298922	0.226208	0.490369	27.5908	-0.00608287	0.149117	0.867677		45.562	0.490274	0.42862	0.0995019	0.215634	41.9613	-0.364746	0.714056	0.447486	0.615853
ENSMUSG00000026036	Nif3l1	156.284	0.247667	0.226087	0.12677	0.341737	150.688	0.142424	0.195453	0.0987041	0.33429	166.608	0.219001	0.226549	0.279741	0.462266	273.842	-1.42717	0.533105	0.00191741	0.011399
ENSMUSG00000026037	Orc2	3295.43	0.0505915	0.0843712	0.529984	0.773521	3207.3	0.106605	0.0810227	0.124004	0.382804	3803.91	0.142815	0.0796066	0.0694091	0.163468	920.008	-0.0106954	0.287141	0.966249	0.981152
ENSMUSG00000094245	Gm23966	7.4605	-0.0925547	0.302038	0.16545		6.61313	-0.0266365	0.156347	0.123747		8.07895	-0.360674	0.619254	0.111295	0.23503
ENSMUSG00000085054	Gm15834	16.9592	0.118713	0.299628	0.25452	0.525468	12.614	0.00809376	0.151773	0.761851		17.5924	0.228527	0.460727	0.365416	0.556382	7.03668	-0.582313	0.94999	0.221349	0.385427
ENSMUSG00000038174	Fam126b	6447.12	-0.118735	0.0768165	0.107981	0.308259	6121.12	-0.0965979	0.0725433	0.130764	0.394891	6928.03	-0.242811	0.0725393	0.000711948	0.0033379	1844.47	0.701346	0.261024	0.00506045	0.0244083
ENSMUSG00000026032	Ndufb3	44.9913	-0.10911	0.264227	0.419339	0.689037	43.9964	-0.0247126	0.149284	0.57846		45.7053	-0.438405	0.423204	0.129735	0.264519	71.6062	-0.484549	0.403344	0.180838	0.33533
ENSMUSG00000059647	Gm10068	3.21663	-0.0256356	0.286614	0.555877		5.99004	0.0119806	0.153516	0.492525		6.49112	0.104758	0.482695	0.559034	0.72616
ENSMUSG00000047528	Als2cr12	7.4809	0.0693813	0.291254	0.322366		4.5586	0.000659057	0.152943	0.970293		5.46742	0.0127667	0.471761	0.943231
ENSMUSG00000026031	Cflar	1687.49	-0.130995	0.102689	0.170645	0.413322	1604.73	-0.0945649	0.0930516	0.208521	0.505065	1828.86	-0.233561	0.102509	0.0197379	0.058618	112.503	0.489832	0.448493	0.215124	0.377989
ENSMUSG00000026029	Casp8	220.781	-0.258912	0.224551	0.110219	0.312456	234.819	-0.00876667	0.131401	0.896569	0.963154	208.383	-0.958654	0.257429	3.78609e-05	0.000241787	29.8314	0.857029	0.781658	0.111013	0.239761
ENSMUSG00000102719	RP24-273P12.4	4.72598	0.0132067	0.282955	0.814639		3.73557	-0.00124023	0.15309	0.931187		6.14178	0.110124	0.482896	0.545889		13.6988	0.915468	1.3855	0.0639718	0.16244
ENSMUSG00000099719	Gm28802	165.364	-0.263826	0.223824	0.104129	0.300794	167.061	-0.0521233	0.139874	0.461506	0.745698	192.239	-0.220158	0.216321	0.258896	0.437972	53.0853	1.90558	0.771149	0.00199881	0.0117818
ENSMUSG00000026028	Trak2	1819.46	-0.256286	0.100811	0.00649256	0.0407384	1848.68	-0.0381634	0.0976688	0.61469	0.83675	2177.1	-0.0679726	0.101075	0.491942	0.672319	329.923	0.295979	0.405647	0.418083	0.589199
ENSMUSG00000026027	Stradb	6054.87	-0.0646938	0.0794316	0.396245	0.668443	6070.32	0.0770217	0.0738972	0.235892	0.541786	6547.72	-0.165014	0.0758179	0.0275819	0.0771604	2310.23	0.990113	0.347229	0.00208594	0.012147
ENSMUSG00000072295	Als2cr11	35.7966	0.455397	0.578426	0.0315377	0.132198	23.9755	0.0180864	0.151058	0.608139		100.429	2.72849	0.368705	1.06009e-14	2.61061e-13	7.81323	0.256805	0.707258	0.592534	0.735712
ENSMUSG00000038079	Tmem237	49.1526	0.0015636	0.240765	0.992723	0.997543	41.3335	-0.0259878	0.150998	0.522077		65.148	0.306907	0.334029	0.237221	0.411715	15.3099	0.450747	0.698988	0.357835	0.531746
ENSMUSG00000079550	Mpp4	111.645	1.69109	0.331285	2.03528e-08	8.22095e-07	45.3714	-0.00792825	0.146769	0.857435		273.291	3.10533	0.241113	7.24459e-39	1.02963e-36	6.10882	-0.711516	0.97666	0.168735	0.319057
ENSMUSG00000101586	Gm29017	7.86307	0.116172	0.313336	0.113938		4.71497	0.0100021	0.153422	0.544511		12.9966	1.3863	1.31172	0.0120142	0.0389981
ENSMUSG00000099563	Gm19125	2.67154	0.00751834	0.285537	0.852884							2.62139	0.00154197	0.49147	0.992058
ENSMUSG00000026024	Als2	3049.69	0.203797	0.091646	0.0187527	0.0905962	2958.35	0.248361	0.0937033	0.00193489	0.0226876	3898.53	0.555217	0.0816356	5.23976e-12	9.56663e-11	640.019	-1.43035	0.365167	2.60407e-05	0.000348771
ENSMUSG00000026023	Cdk15	163.031	-0.1643	0.206144	0.278074	0.552851	167.88	-0.00391948	0.131203	0.952417	0.983875	176.037	-0.322941	0.227083	0.110692	0.234031	20.7069	0.61184	0.658542	0.21681	0.379915
ENSMUSG00000099922	Gm29016	364.367	-0.0170972	0.153666	0.893979	0.961164	336.198	-0.0372852	0.123184	0.623996	0.842054	362.482	-0.349141	0.173943	0.0316429	0.0866374	89.3397	1.90562	0.483627	1.45309e-05	0.000214432
ENSMUSG00000104502	RP24-149E13.2	6.57274	0.00806848	0.281183	0.899532		5.73394	-0.000762721	0.152858	0.961876		6.06586	-0.0464776	0.47662	0.777983		3.03031	0.216158	0.882722	0.551901	0.702996
ENSMUSG00000041075	Fzd7	561.595	-0.0177219	0.158506	0.892542	0.960615	481.731	-0.221015	0.157413	0.0327292	0.168437	657.252	0.0922534	0.131235	0.466835	0.651771	203.485	1.0279	0.467643	0.0124636	0.0486801
ENSMUSG00000097819	Gm26813	47.7179	0.333034	0.396059	0.0690466	0.229974	36.9193	0.0257358	0.150774	0.534716		54.1276	0.602466	0.411116	0.0458999	0.117381	11.4948	0.102389	0.648259	0.830285	0.900559
ENSMUSG00000047361	Gm973	155.866	0.436563	0.270073	0.0220736	0.10224	109.226	-0.0428748	0.144245	0.49563	0.768953	171.13	0.485674	0.240335	0.0224995	0.065338	16.4869	-0.447932	0.609778	0.342151	0.516362
ENSMUSG00000099811	Gm28411	2.82617	0.00899707	0.284627	0.847937							2.7895	0.000228121	0.486621	0.999042
ENSMUSG00000026021	Sumo1	4144.84	0.0924839	0.0867419	0.263334	0.53581	4133.31	0.209757	0.0863824	0.00482825	0.0447576	4045.14	-0.296107	0.0825454	0.000271833	0.0014264	1861.31	0.451848	0.440468	0.251234	0.419741
ENSMUSG00000103821	RP24-147G7.2	20.4678	-0.00139734	0.268203	0.985886	0.994502	24.2085	0.0263553	0.153687	0.408342		35.0134	0.62639	0.524501	0.0580838	0.141579
ENSMUSG00000026020	Nop58	3206.59	-0.119512	0.103045	0.212836	0.47238	3563.64	0.249107	0.122076	0.00871546	0.0682433	4085.71	0.228546	0.0998185	0.0194544	0.0578947	1031.58	-0.793557	0.285973	0.00343337	0.0180375
ENSMUSG00000067336	Bmpr2	6337.12	-0.248501	0.0782931	0.000951554	0.00878866	6238.21	-0.114438	0.0770075	0.0869618	0.309504	7454.62	-0.101375	0.0726952	0.158387	0.306335	886.202	0.126204	0.26105	0.616756	0.753595
ENSMUSG00000104052	RP24-178N19.2	4.07625	0.0112495	0.284997	0.801982							5.72294	0.125664	0.495435	0.451593
ENSMUSG00000041040	Fam117b	10255.3	-0.191593	0.074422	0.00739551	0.0451811	10401.7	0.00320877	0.0669446	0.955489	0.984457	12007.5	-0.0596316	0.0695797	0.381326	0.572244	791.775	0.237218	0.277917	0.372924	0.544984
ENSMUSG00000103696	RP23-27C10.2	26.0181	0.052806	0.266198	0.640607	0.839786	20.1594	-0.0127051	0.150914	0.692305		32.7836	0.308648	0.421367	0.264572	0.444746	40.9489	-1.47664	0.512833	0.00101557	0.00694772
ENSMUSG00000100901	Gm18829	8.84212	0.068168	0.289466	0.360319	0.636618	5.45676	-0.000908486	0.152926	0.952811		6.677	0.00736713	0.464472	0.971081	0.984769	2.09661	0.378201	0.970891	0.276105
ENSMUSG00000026018	Ica1l	324.719	0.184852	0.17105	0.186992	0.435313	321.279	0.197802	0.184045	0.0566446	0.237755	347.464	0.118817	0.172081	0.46382	0.649104	126.599	-0.640956	0.450824	0.103635	0.228263
ENSMUSG00000026019	Wdr12	410.269	0.799748	0.182241	1.30094e-06	3.32637e-05	329.049	0.311856	0.211955	0.0143226	0.0962451	546.772	1.20709	0.157673	3.19086e-15	8.42055e-14	335.531	-2.20105	0.536831	5.38772e-06	9.32725e-05
ENSMUSG00000026017	Carf	130.756	0.284408	0.252536	0.096982	0.287924	125.739	0.12563	0.194632	0.102968	0.342176	131.448	0.144146	0.24374	0.50107	0.68005	65.8631	-0.242413	0.403982	0.503446	0.663089
ENSMUSG00000073664	Nbeal1	2031.19	-0.273113	0.0948467	0.00223173	0.0174534	1829.42	-0.422161	0.101405	3.46362e-06	0.000144484	2288.66	-0.260815	0.089042	0.00287681	0.0114258	305.705	0.331653	0.338391	0.293832	0.466034
ENSMUSG00000049439	Cyp20a1	187.764	0.091716	0.191112	0.529035	0.772879	181.231	0.0592904	0.141325	0.414707	0.713378	219.78	0.235155	0.216377	0.229936	0.402315	126.756	-0.582708	0.378318	0.0906943	0.207782
ENSMUSG00000026782	Abi2	620.259	-0.0665564	0.129849	0.565195	0.795599	586.977	-0.0456456	0.109292	0.561256	0.809595	669.266	-0.179309	0.131757	0.157753	0.305353	109.37	0.14471	0.409776	0.697064	0.810029
ENSMUSG00000026014	Raph1	1104.56	-0.328974	0.13609	0.00657538	0.0412057	1072.71	-0.220048	0.119995	0.0169323	0.107964	1118.85	-0.701712	0.116645	6.00966e-10	8.56357e-09	257.582	1.38959	0.317909	3.91551e-06	7.07468e-05
ENSMUSG00000101188	Eif4a-ps4	180.679	-0.307344	0.227593	0.0648081	0.220171	209.318	0.0564502	0.136247	0.45048	0.739844	186.055	-0.651848	0.234495	0.00198054	0.00824877	48.7232	0.0314836	0.513394	0.944536	0.968573
ENSMUSG00000026011	Ctla4	32.0284	-0.0525946	0.259584	0.661944	0.851353	25.4767	-0.0497858	0.160848	0.178967		28.7812	-0.498643	0.531447	0.106115	0.226699	16.3072	0.486746	0.6727	0.324441	0.498403
ENSMUSG00000082804	Rpl17-ps1	2.6151	-0.0273397	0.287188	0.505497
ENSMUSG00000085248	Gm11587	91.3675	-0.226311	0.276162	0.1688	0.410821	103.898	0.0120454	0.139233	0.810094	0.930364	106.986	-0.25357	0.271817	0.269124	0.449574	21.9558	1.31197	0.789522	0.0245657	0.0809064
ENSMUSG00000086408	Gm11588	31.9967	0.00720756	0.256713	0.953076	0.98295	33.6362	0.0244042	0.150739	0.547176		40.5487	0.203205	0.372954	0.441242	0.629085	6.33695	0.583557	0.974636	0.214019	0.376791
ENSMUSG00000089546	Gm25839	19.1796	-0.141947	0.311193	0.193975	0.444825	21.8152	-0.0124546	0.150747	0.704616		24.5655	-0.156455	0.41446	0.534964	0.7074	2.34	0.308675	0.961955	0.299743
ENSMUSG00000100965	Gm28449	65.1939	-0.0148956	0.233933	0.911443	0.968731	58.2566	-0.0269509	0.147508	0.588803	0.824728	69.9719	-0.118036	0.30466	0.626475	0.776753	4.42192	0.0844239	0.763908	0.852534	0.914925
ENSMUSG00000052062	Pard3b	168.123	-0.251532	0.223282	0.119442	0.329055	164.424	-0.0729449	0.152123	0.301457	0.614604	192.717	-0.260334	0.23539	0.209809	0.376644	11.5043	0.220943	0.744994	0.639621	0.769463
ENSMUSG00000085019	Pard3bos2	79.6664	0.00451004	0.22187	0.97722	0.991539	74.756	-0.00189639	0.142192	0.969665	0.989773	72.1743	-0.496247	0.344678	0.0657378	0.156586	49.2432	2.47859	0.879459	0.000472242	0.00372711
ENSMUSG00000100750	Gm29084	4.56873	0.0794856	0.299992	0.132281							9.63151	2.25509	1.4982	0.00591938	0.0213603
ENSMUSG00000025969	Nrp2	27.2515	-0.205286	0.348807	0.117166	0.32466	32.838	-0.00967653	0.148659	0.804356		36.9604	-0.14509	0.379162	0.570446	0.73529	6.22512	0.338091	0.883734	0.420381	0.591456
ENSMUSG00000040865	Ino80d	11145.6	-0.169112	0.0742201	0.0179791	0.0879778	10336.5	-0.217087	0.0736272	0.00100895	0.0138185	12404.3	-0.187971	0.0697268	0.00644392	0.0229409	986.292	0.164492	0.378209	0.635793	0.766782
ENSMUSG00000084799	Ino80dos	25.9754	-0.017675	0.261654	0.871346	0.951254	23.3522	-0.014549	0.150721	0.669202		28.3526	-0.0742552	0.386251	0.766359	0.871508	8.09801	-0.748286	0.972352	0.155873	0.302916
ENSMUSG00000101599	Gm20342	30.2558	0.7503	0.84893	0.0127649	0.0681615	21.3123	0.0391085	0.157437	0.234273		22.9842	0.225431	0.456479	0.374912	0.565869	25.7903	-1.58953	0.752902	0.00644507	0.0293482
ENSMUSG00000025968	Ndufs1	195.794	0.179822	0.197424	0.231737	0.496711	193.748	0.145229	0.18652	0.105061	0.345737	224.998	0.291739	0.210369	0.126575	0.259291	176.924	-0.966103	0.501298	0.0243293	0.0803827
ENSMUSG00000025967	Eef1b2	1987.9	-0.157361	0.0965408	0.0819128	0.257119	2101.71	0.113049	0.08917	0.126049	0.385604	1866.8	-0.759346	0.101312	2.10635e-14	5.05547e-13	417.498	-0.0375457	0.356378	0.906315	0.948046
ENSMUSG00000046856	Gpr1	415.487	-0.588026	0.168563	8.22048e-05	0.0011623	407.039	-0.417486	0.182279	0.00183693	0.0219155	387.46	-1.41948	0.177624	1.48279e-16	4.45349e-15	75.8968	1.12174	0.425614	0.00346708	0.0181732
ENSMUSG00000094290	Gm27512	2.52648	0.0164959	0.285604	0.706548		3.06124	0.00702404	0.153637	0.542516		7.07963	0.423019	0.713819	0.0591269	0.143703
ENSMUSG00000086730	Gm11607	2.45523	0.0583978	0.296012	0.0463676												2.05892	-0.57685	1.18336	0.0570758
ENSMUSG00000027520	Zdbf2	437.48	0.315283	0.163739	0.0229412	0.105362	337.336	-0.0823485	0.132383	0.312633	0.62402	634.219	0.969557	0.143243	2.90775e-12	5.50296e-11	13.8038	-0.909332	0.891802	0.105221	0.230904
ENSMUSG00000025964	Adam23	18.7192	0.0077565	0.267736	0.940161	0.978893	14.743	-0.0170049	0.152599	0.536841		17.1413	-0.180818	0.447479	0.457327	0.64309
ENSMUSG00000069085	Dytn	3.68445	-0.0441851	0.290551	0.275815		4.043	-0.00129776	0.153745	0.78539		4.4617	-0.117944	0.506635	0.381871
ENSMUSG00000025962	Fastkd2	237.681	-0.0918637	0.179078	0.514228	0.762119	227.517	-0.033993	0.129522	0.641592	0.850148	238.486	-0.433129	0.205706	0.0207971	0.0611621	178.214	0.136088	0.409554	0.713875	0.822538
ENSMUSG00000082373	Gm13754	4.5809	-0.0132699	0.283676	0.796712		5.54166	0.00405006	0.153009	0.806763		6.81135	0.0642014	0.476388	0.712437	0.835596
ENSMUSG00000025959	Klf7	1368.37	-0.109058	0.108331	0.275587	0.550557	1307.94	-0.0588582	0.0994993	0.444258	0.735176	1363.43	-0.478253	0.121176	4.52631e-05	0.000285454	195.002	1.14863	0.41027	0.00207047	0.0120823
ENSMUSG00000025958	Creb1	357.769	0.598945	0.182596	0.000168357	0.00209724	294.354	0.157303	0.1699	0.0974629	0.331985	450.039	0.90522	0.167488	1.55706e-08	1.80964e-07	126.843	-0.569201	0.447514	0.14587	0.289411
ENSMUSG00000025956	Mettl21a	5.75356	-0.00784066	0.281575	0.894833		8.40444	0.0173201	0.153871	0.405158		16.7257	1.03026	1.02087	0.0212156	0.062124	62.5844	-0.781413	0.565488	0.0898121	0.206466
ENSMUSG00000087213	2810408I11Rik	1003.05	-0.685198	0.130061	1.91724e-08	7.86657e-07	1048.61	-0.305268	0.121314	0.00185672	0.0220307	1040.23	-1.00442	0.131326	3.93172e-15	1.0239e-13	903.85	1.1928	0.418489	0.00164074	0.0101244
ENSMUSG00000070871	Ccnyl1	755.419	-0.0191932	0.121604	0.860731	0.947717	780.513	0.147023	0.120236	0.0944161	0.325917	919.392	0.202556	0.116681	0.0742863	0.172066	170.954	0.0448246	0.446595	0.912209	0.951815
ENSMUSG00000045005	Fzd5	388.237	0.247775	0.177625	0.0866812	0.267001	309.544	-0.0563024	0.133047	0.457158	0.744782	580.641	0.973251	0.156637	1.16981e-10	1.82347e-09	225.58	0.984191	0.386538	0.00528845	0.0252433
ENSMUSG00000102140	RP24-388P13.2	6.03415	0.00683703	0.280718	0.917618		4.23997	-0.00860965	0.153399	0.574612		3.73391	-0.202966	0.546711	0.151069
ENSMUSG00000051344	Plekhm3	750.391	0.478359	0.137231	0.00012248	0.00161028	669.02	0.276261	0.153574	0.0112528	0.0823929	991.695	0.892393	0.120615	3.42254e-14	8.04573e-13	338.96	-1.71781	0.373185	9.09606e-07	2.02463e-05
ENSMUSG00000084416	Rpl10a-ps1	6.32519	0.0254425	0.282575	0.686568		5.00656	0.00089497	0.152851	0.961326		6.04796	0.0196174	0.468278	0.915276		18.7509	-0.412738	0.58646	0.37251	0.544644
ENSMUSG00000025955	Akr1cl	72.2233	-0.0408376	0.227615	0.770789	0.90543	81.8223	0.0681191	0.158595	0.266734	0.577874	81.8284	-0.0471946	0.285031	0.839305	0.914408	150.975	1.78655	0.579165	0.000369745	0.00305654
ENSMUSG00000100774	Gm7329	5.21243	0.0393822	0.28608	0.497483		5.01308	0.012084	0.153607	0.473538		3.97808	0.00312921	0.479389	0.98643
ENSMUSG00000044816	D630023F18Rik	55.2799	-0.0487172	0.243785	0.713765	0.877238	52.7953	-0.0131076	0.145687	0.785114		52.4894	-0.461805	0.388422	0.103204	0.221857	43.9073	0.948406	0.560051	0.0415766	0.118844
ENSMUSG00000025950	Idh1	338.603	-0.34035	0.182662	0.0227126	0.104619	332.62	-0.146479	0.160226	0.113101	0.360578	333.031	-0.849077	0.205001	8.34283e-06	6.08367e-05	80.4549	1.72723	0.480797	6.63705e-05	0.000759908
ENSMUSG00000025949	Pikfyve	2583.97	-0.0909303	0.0953406	0.310802	0.588631	2484.49	-0.0383415	0.0845427	0.586842	0.823949	2937.56	-0.0478291	0.0906041	0.590553	0.750378	372.872	0.111833	0.337898	0.725379	0.830825
ENSMUSG00000025946	Pth2r	8.31089	0.156805	0.344217	0.0377023		8.48795	0.0406808	0.160864	0.0341378		22.3259	3.44377	0.904741	1.21869e-05	8.60681e-05	2.32953	-0.0762403	0.884738	0.797429
ENSMUSG00000100340	Gm28923	20.7257	-0.0818104	0.280301	0.43679	0.703332	20.334	-0.0189974	0.152053	0.548472		22.9286	-0.229389	0.446986	0.370277	0.561366	47.3052	1.81993	0.682806	0.00131764	0.00851521
ENSMUSG00000082774	Gm8805	5.3384	0.0895286	0.30423	0.0976							2.9739	0.0899106	0.499108	0.496506
ENSMUSG00000015222	Map2	1318.19	-0.200279	0.105144	0.0399764	0.15743	1335.76	-0.0111196	0.0885563	0.876955	0.95642	1417.19	-0.335298	0.109285	0.00161345	0.00688584	60.3451	1.05869	0.4823	0.0121294	0.047678
ENSMUSG00000055567	Unc80	354.738	0.0155468	0.152049	0.905449	0.96653	342.96	0.0354903	0.120544	0.645684	0.852113	349.715	-0.329078	0.173633	0.0426061	0.11069	61.1175	1.77707	0.88111	0.0063757	0.0291174
ENSMUSG00000026005	Rpe	1096.05	-0.425932	0.129811	0.000306778	0.00345645	1055.65	-0.345912	0.12245	0.000619574	0.00977836	1167.65	-0.616407	0.110466	1.03885e-08	1.2378e-07	520.138	0.629593	0.267339	0.0138058	0.0525855
ENSMUSG00000026004	Kansl1l	1064.36	-0.544315	0.124633	2.55353e-06	6.02993e-05	1076.34	-0.288996	0.120764	0.00283188	0.0301974	1111.13	-0.819193	0.116694	6.06615e-13	1.23394e-11	41.1155	0.449936	0.523323	0.305175	0.478557
ENSMUSG00000102559	RP24-429G21.5	13.5171	0.0916653	0.292344	0.317184	0.594697	11.1895	0.0139777	0.152772	0.569826		14.8595	0.244155	0.484984	0.321992	0.511647
ENSMUSG00000102374	RP24-429G21.4	17.172	1.41003	1.10774	0.00512727	0.0337848	12.2747	0.0477607	0.162907	0.0622003		14.4407	0.707764	0.8442	0.0442416	0.113945	2.5011	-0.338433	0.934052	0.351216
ENSMUSG00000102776	RP24-429G21.3	7.81708	0.0379082	0.28308	0.583179		4.97019	-0.00460378	0.153126	0.764464		11.1547	0.277688	0.532141	0.231023	0.403632	3.78507	-0.101566	0.845859	0.782803	0.870004
ENSMUSG00000082057	Gm15789	7.41706	0.074414	0.293213	0.28853		3.11316	-0.00794621	0.153547	0.550233		4.4244	-0.0304559	0.480196	0.842686
ENSMUSG00000103706	RP24-429G21.2	8.00168	-0.00596342	0.27925	0.929247		4.48668	-0.0207572	0.155455	0.103384		8.48502	-0.0424786	0.461712	0.822491	0.904748	2.69534	-0.133818	0.910441	0.607846
ENSMUSG00000103756	RP24-429G21.1	10.7231	-0.0220275	0.276432	0.785566	0.913102	8.26729	-0.018864	0.154089	0.366563		9.33223	-0.244095	0.522049	0.261087	0.440684
ENSMUSG00000103382	RP24-429G21.6	31.1115	-0.415056	0.578357	0.0332944	0.137868	30.6673	-0.0648947	0.168962	0.0946588		34.6091	-0.825812	0.561986	0.0223368	0.0649697	2.32942	-0.00731602	0.855831	0.981107
ENSMUSG00000026003	Acadl	57.9781	0.083064	0.246313	0.551624	0.787203	55.3747	0.0305351	0.148784	0.537449	0.795251	61.7023	0.0720811	0.318694	0.773454	0.876068	48.3096	3.26787	0.721803	5.96758e-07	1.41954e-05
ENSMUSG00000061816	Myl1	4.45404	-0.0286002	0.284897	0.600214		8.35366	0.0191023	0.154274	0.344947		3.93107	-0.153147	0.521688	0.242803		2.7731	0.42591	1.07034	0.0755897
ENSMUSG00000026000	Lancl1	501.253	-0.301308	0.154764	0.0234206	0.107051	529.409	-0.00985389	0.109768	0.898704	0.963248	564.049	-0.313984	0.145254	0.0235596	0.0678816	355.104	1.06117	0.395834	0.00325331	0.0172903
ENSMUSG00000025991	Cps1	38.1742	-0.371691	0.493714	0.0443596	0.169644	49.9884	0.00762799	0.146382	0.869272		50.0946	-0.248405	0.367999	0.345722	0.53601	34.5637	0.982872	0.800148	0.0777332	0.186211
ENSMUSG00000086204	Gm15668	126.687	-0.0628898	0.203618	0.66427	0.852646	124.52	-0.00185712	0.13642	0.974669	0.991746	131.952	-0.263781	0.251864	0.227061	0.398567	190.174	0.525588	0.397015	0.142787	0.285315
ENSMUSG00000096031	Gm23189	7.52603	0.0209273	0.280168	0.767854		9.49715	0.0215406	0.154427	0.336574		10.3542	0.168771	0.483677	0.426788	0.615345
ENSMUSG00000087329	Gm15671	7.70371	-0.025262	0.280098	0.721974		8.1319	-0.000603741	0.152314	0.974521		7.14596	-0.188407	0.505076	0.336916	0.526978	6.44711	0.077773	0.771425	0.86343	0.921541
ENSMUSG00000062209	Erbb4	101.01	-0.169212	0.240669	0.276593	0.551034	95.0209	-0.0615836	0.155292	0.306614	0.61846	114.622	-0.222901	0.266405	0.324538	0.51414	19.889	1.38368	0.742127	0.014876	0.0556273
ENSMUSG00000101387	Pced1c-ps	3.42077	0.00881377	0.283876	0.863015		6.06944	0.0227406	0.155331	0.200929		7.39182	0.308941	0.582591	0.1436	0.285523
ENSMUSG00000025997	Ikzf2	336.143	-0.102599	0.158093	0.437785	0.704176	327.784	-0.0207935	0.120411	0.781052	0.920022	357.544	-0.269942	0.170856	0.0920206	0.202858	52.2484	0.42893	0.443923	0.272934	0.443946
ENSMUSG00000053153	Spag16	431.306	-0.0663373	0.151648	0.605515	0.820427	475.923	0.223075	0.16056	0.0331154	0.169541	481.691	-0.0746827	0.153165	0.607838	0.76256	172.873	1.55859	0.455227	0.000157935	0.00152763
ENSMUSG00000080524	Gm23879	3.32866	-0.0297831	0.287033	0.507848		4.29318	-0.00127456	0.153022	0.932389		3.67399	-0.122007	0.503705	0.40405
ENSMUSG00000045648	Vwc2l	21.3834	-0.0754211	0.277766	0.471345	0.730861	27.0413	0.0185797	0.151578	0.580202		27.2775	-0.0186081	0.393594	0.93747	0.967994	2.36743	-0.0498948	0.856285	0.885386
ENSMUSG00000026196	Bard1	653.918	-0.175539	0.144563	0.160848	0.397286	654.953	-0.0225818	0.110104	0.768854	0.914887	633.734	-0.672792	0.152067	3.5774e-06	2.80731e-05	51.6935	0.154135	0.484179	0.712002	0.820936
ENSMUSG00000050296	Abca12	175.183	-0.56787	0.253621	0.00371137	0.0259489	181.257	-0.138072	0.183742	0.113432	0.361179	176.732	-1.05051	0.274341	2.06336e-05	0.000139298	21.5667	-0.0406711	0.718521	0.925633	0.958331
ENSMUSG00000026192	Atic	682.011	0.0407738	0.131732	0.728464	0.885089	684.54	0.110177	0.135817	0.201906	0.497096	774.95	0.0934756	0.12967	0.456275	0.642181	102.903	-0.620976	0.480199	0.133046	0.271894
ENSMUSG00000026193	Fn1	296.983	0.524544	0.211656	0.00247748	0.0189364	233.431	0.0514378	0.132119	0.494401	0.76775	312.558	0.424956	0.187394	0.0144125	0.0452693	51.2972	1.54792	0.479897	0.000320243	0.00271915
ENSMUSG00000101211	Gm28818	13.9785	-0.0328198	0.274064	0.71617	0.878474	13.3531	-0.00799785	0.151657	0.764272		16.75	-0.0169439	0.419819	0.939872	0.968741
ENSMUSG00000101848	4933417E11Rik	157.651	0.0345756	0.194196	0.811699	0.925359	150.933	0.0237327	0.136422	0.719973	0.891628	164.931	-0.103331	0.228471	0.610899	0.764987	55.2642	1.05305	0.432262	0.00648597	0.0294841
ENSMUSG00000101764	4930556G22Rik	12.6402	0.0696556	0.284886	0.429649	0.697024	6.47956	-0.0177397	0.154352	0.309585		9.15439	-0.116249	0.467166	0.570681	0.735447	2.9535	0.409785	0.952826	0.297368	0.469823
ENSMUSG00000102123	Gm4319	27.5026	-0.0727148	0.26844	0.533821	0.776005	29.1777	-0.0010091	0.148625	0.9766		29.8694	-0.221789	0.409538	0.39797	0.588617	4.20988	-0.204575	0.836031	0.614725	0.751948
ENSMUSG00000039395	Mreg	374.551	0.767772	0.180509	2.50066e-06	5.94045e-05	284.547	0.131726	0.160318	0.141056	0.412239	525.677	1.28633	0.153466	7.73245e-18	2.67742e-16	217.357	0.109979	0.342601	0.732287	0.835412
ENSMUSG00000094655	Gm25360	89.1408	0.274983	0.294455	0.114555	0.320309	85.9738	0.112545	0.192379	0.0979413	0.332701	82.5444	0.0320496	0.295459	0.893983	0.945463
ENSMUSG00000094050	Gm23472	4.06231	-0.0785616	0.30074	0.0974646		5.90613	-0.00534348	0.152901	0.761446		7.75244	-0.00903348	0.461723	0.958956	0.979313
ENSMUSG00000093956	Gm24497	10.9993	0.0510739	0.281646	0.536495	0.777712	10.1999	0.0124703	0.152724	0.598801		8.13393	-0.120627	0.475691	0.537825	0.709218	2.97806	-0.379801	0.914088	0.351665	0.526216
ENSMUSG00000093843	Gm25939	52.2637	0.104753	0.255289	0.454035	0.718093	55.9473	0.0762311	0.170158	0.151428	0.42705	55.968	0.134562	0.330699	0.596225	0.753963
ENSMUSG00000026189	Pecr	1281.36	-0.248222	0.112891	0.0165964	0.0828884	1322.9	-0.0068021	0.092533	0.922168	0.971201	1264.88	-0.688578	0.124214	1.06796e-08	1.27109e-07	638.003	0.262082	0.398968	0.469122	0.634948
ENSMUSG00000026188	Tmem169	1027.61	-0.0853548	0.109724	0.398798	0.670335	1007.62	0.0036162	0.0974401	0.964244	0.987704	1130.4	-0.141017	0.111218	0.192767	0.353821	196.904	0.71874	0.364031	0.0319398	0.0981395
ENSMUSG00000026187	Xrcc5	270.872	0.0562978	0.167549	0.680778	0.860571	272.513	0.095181	0.147359	0.244328	0.552496	287.334	-0.059606	0.180323	0.722338	0.842754	45.2631	-0.343648	0.54171	0.43678	0.605597
ENSMUSG00000039372	March4	108.118	0.0975465	0.217486	0.512873	0.761409	109.817	0.0846096	0.163292	0.217892	0.517827	118.838	0.115299	0.251784	0.599225	0.756476	19.2631	0.312945	0.668363	0.516588	0.67376
ENSMUSG00000039354	Smarcal1	1422.01	-0.0826437	0.10088	0.380496	0.654326	1346.86	-0.0621256	0.0917297	0.401673	0.702868	1398.67	-0.488642	0.102608	1.09525e-06	9.43214e-06	83.0768	0.557549	0.53088	0.20849	0.370263
ENSMUSG00000110712		6.77336	0.114455	0.314991	0.0835283		2.8561	0.00447808	0.153375	0.730661		4.33863	0.116872	0.498637	0.451535		2.92375	-0.269378	0.929457	0.396425	0.568228
ENSMUSG00000039342	Ankar	36.8321	1.71572	0.624291	0.0002645	0.00306713	18.2553	0.0300181	0.155081	0.318009		51.2786	2.25868	0.498273	4.28203e-07	3.969e-06	14.0467	-0.523678	0.728306	0.294013	0.466178
ENSMUSG00000110596		2.7714	0.0576602	0.294843	0.128083
ENSMUSG00000046330	Rpl37a	386.123	-0.199036	0.160909	0.139579	0.364373	448.073	0.190211	0.164013	0.0590824	0.244652	473.952	0.0213853	0.152429	0.884302	0.940392	732.673	-1.92771	0.338791	2.28619e-09	1.02752e-07
ENSMUSG00000039323	Igfbp2	29.8639	0.137595	0.298327	0.258536	0.530094	28.0907	0.0330379	0.155249	0.321395		42.835	0.776183	0.580399	0.031235	0.085607	56.358	-1.22557	0.637099	0.0162614	0.0595222
ENSMUSG00000026185	Igfbp5	68.7423	-0.00912117	0.232984	0.945106	0.98095	65.9314	-0.000700481	0.144782	0.987207	0.996294	80.3426	0.0664961	0.295506	0.784203	0.882406	13.7301	2.5888	1.01834	0.00102022	0.00697189
ENSMUSG00000101968	1700027A15Rik	27.1942	-0.224625	0.361529	0.104277	0.301087	37.272	0.0188689	0.149165	0.653791		31.3635	-0.463405	0.478209	0.122317	0.252736
ENSMUSG00000102266	RP24-141F19.1	8.85988	-0.0587187	0.285622	0.441774	0.707027	9.29096	-0.0086161	0.152532	0.695432		10.524	-0.131456	0.464999	0.537178	0.708837
ENSMUSG00000101112	Gm29185	5.00171	0.0190866	0.282996	0.74438		3.30162	-0.00539505	0.153338	0.6924		4.67669	-0.00620527	0.47618	0.966557		2.39907	0.255143	0.901308	0.474164
ENSMUSG00000100301	6030407O03Rik	51.2951	-0.0138489	0.239452	0.915428	0.970227	46.5096	-0.0176224	0.147186	0.702897		50.2772	-0.275167	0.358918	0.298247	0.484701	13.2931	-0.182132	0.65417	0.698011	0.810775
ENSMUSG00000101344	Gm29183	50.1322	0.055832	0.250848	0.669289	0.854839	51.7979	0.0501489	0.155953	0.314516		46.7456	-0.165854	0.354131	0.518584	0.695115	8.01051	0.324027	0.819571	0.479236	0.64356
ENSMUSG00000098504	Mir6351	6.43812	-0.012934	0.281421	0.832209		5.55948	-0.00689211	0.153037	0.691222		4.78179	-0.241046	0.559483	0.143965
ENSMUSG00000055322	Tns1	22.3024	-0.111073	0.289295	0.320988	0.598772	21.5741	-0.0273699	0.153529	0.409983		22.3402	-0.415642	0.544639	0.147695	0.291325
ENSMUSG00000061815	Rufy4	3.79214	0.029397	0.285722	0.567096							5.71801	0.177698	0.518384	0.28652
ENSMUSG00000026180	Cxcr2	5.82872	0.109282	0.313861	0.0631546							5.6227	0.313098	0.611029	0.0915948		1.64925	-0.213136	0.930156	0.432086
ENSMUSG00000048480	Cxcr1	3.57187	0.0327521	0.287194	0.482511							2.86718	0.0318837	0.489644	0.807361
ENSMUSG00000006304	Arpc2	2635.69	0.0413834	0.0927897	0.638005	0.838268	2431.13	-0.01927	0.0794362	0.773964	0.917558	2770.11	-0.1282	0.0909719	0.148399	0.292401	1095.97	0.0301993	0.257382	0.905482	0.947651
ENSMUSG00000064272	Gpbar1	3.09939	-0.0467379	0.291081	0.248443		3.09872	-0.0106463	0.153918	0.37589		5.03244	-0.0356046	0.475978	0.8282
ENSMUSG00000006299	Aamp	1150.82	-0.0811842	0.124754	0.469075	0.729275	1236.68	0.182394	0.123983	0.0454167	0.208628	1177.12	-0.361328	0.123566	0.00247285	0.0100134	173.336	-0.682966	0.347056	0.033213	0.100727
ENSMUSG00000026179	Pnkd	365.605	0.0530569	0.150552	0.680933	0.860587	352.086	0.0497802	0.124562	0.523108	0.787553	386.914	-0.0756183	0.161862	0.622235	0.773661	141.524	0.47491	0.33419	0.127987	0.264731
ENSMUSG00000103013	RP23-280F6.5	2.79015	-0.0105969	0.28565	0.788803							3.0611	-0.0426726	0.490327	0.740624
ENSMUSG00000006301	Tmbim1	1618.57	-0.172635	0.103097	0.0716881	0.235308	1662.5	0.0330029	0.0866678	0.646686	0.852745	1752.57	-0.285467	0.100397	0.00360553	0.0138765	1037.16	0.820732	0.490499	0.0522942	0.140219
ENSMUSG00000103403	RP23-280F6.6	29.8192	0.0134363	0.262075	0.904894	0.966341	25.4474	-0.0134347	0.150552	0.692906		26.9088	-0.25734	0.44069	0.330193	0.519653
ENSMUSG00000073650	Catip	4.65861	0.0459977	0.288408	0.394951		2.81732	0.00121856	0.153322	0.923756		8.037	0.370136	0.64446	0.0859829	0.192832
ENSMUSG00000026177	Slc11a1	23.5858	0.0770311	0.274863	0.489829	0.745968	24.2861	0.0346488	0.155307	0.322226		26.3182	0.185788	0.413232	0.474829	0.658395	51.0197	0.514215	0.486637	0.218011	0.381626
ENSMUSG00000026176	Ctdsp1	1209.96	0.0261614	0.108149	0.795073	0.917345	1116.95	-0.0254417	0.0941612	0.732084	0.89864	1279.18	-0.124296	0.107512	0.236139	0.410131	73.2277	0.369296	0.39691	0.304557	0.47775
ENSMUSG00000026175	Vil1	2072.72	-0.0191619	0.0917201	0.82464	0.931337	2013.75	0.0395341	0.0831149	0.573104	0.814975	2336.75	0.00341589	0.0932078	0.970518	0.984554	512.293	0.998647	0.354461	0.00238219	0.0135462
ENSMUSG00000033364	Usp37	11987.7	-0.392424	0.0761099	9.50356e-08	3.27873e-06	12278.7	-0.131433	0.0710531	0.0373455	0.183682	13427.8	-0.39231	0.0687067	7.91772e-09	9.58635e-08	3486.01	0.0218046	0.24346	0.929018	0.960244
ENSMUSG00000103227	RP23-102B12.2	56.5835	-0.333319	0.373399	0.0712335	0.23436	65.9767	-0.00685961	0.143595	0.892187	0.962082	64.4752	-0.462003	0.36763	0.096028	0.209609	43.7348	-2.11462	0.766705	0.000688426	0.00507152
ENSMUSG00000026174	Rqcd1	1111.08	-0.142023	0.115382	0.177402	0.422947	1094.28	-0.0258299	0.0969915	0.732	0.89864	1241.82	-0.156231	0.109639	0.143523	0.285405	711.961	-0.0568076	0.279034	0.829404	0.900073
ENSMUSG00000026173	Plcd4	155.696	0.398586	0.267575	0.0325563	0.135475	147.684	0.212472	0.275098	0.0408465	0.194323	246.48	1.27044	0.242177	2.20324e-08	2.50049e-07	121.396	-5.32361	0.678972	5.94723e-16	1.10094e-13
ENSMUSG00000026135	Zfp142	2202.39	-0.418962	0.100498	1.02686e-05	0.000199209	2177.36	-0.256071	0.100046	0.0023253	0.0259395	2590.81	-0.268031	0.0878998	0.00192454	0.00804325	260.492	-0.294729	0.510723	0.488747	0.651144
ENSMUSG00000026172	Bcs1l	46.0445	0.031875	0.244535	0.810204	0.924742	50.6475	0.0567934	0.159049	0.259517		66.7783	0.565833	0.36832	0.0459395	0.117453	54.9118	-0.354278	0.451393	0.368187	0.540719
ENSMUSG00000026171	Rnf25	505.429	-0.173415	0.142167	0.16085	0.397286	483.169	-0.0960186	0.126608	0.252693	0.562286	543.19	-0.319555	0.146185	0.0218587	0.0636729	99.7312	-0.633249	0.479111	0.124476	0.259284
ENSMUSG00000033276	Stk36	2347.17	-0.257779	0.0915339	0.00288646	0.0213311	2256.67	-0.185251	0.0945297	0.0181139	0.112589	2386.69	-0.586741	0.0923753	9.87798e-11	1.55989e-09	326.452	0.592081	0.490119	0.160201	0.308084
ENSMUSG00000033257	Ttll4	4906.51	-0.242918	0.084186	0.00246808	0.0188773	4583.99	-0.271221	0.0820809	0.00020839	0.00417732	5631.76	-0.171785	0.0739613	0.0187911	0.0563526	839.024	-0.0887858	0.315261	0.762491	0.856388
ENSMUSG00000026170	Cyp27a1	24.3215	0.297477	0.455048	0.0511212	0.187153	12.5752	-0.00740383	0.151894	0.768504		16.171	0.00275722	0.420865	0.993289	0.996326	5.0163	0.275937	0.911738	0.436563	0.605431
ENSMUSG00000006542	Prkag3	3.80952	0.0329209	0.286316	0.52154							6.36339	0.262119	0.562213	0.16344	0.313598
ENSMUSG00000089964	Gm16582	4.2243	0.0321766	0.285582	0.554603		4.16161	0.00997186	0.153535	0.518392		3.58024	0.0202509	0.482495	0.893258
ENSMUSG00000090071	Cdk5r2	418.817	0.0282202	0.145631	0.823829	0.930844	387	-0.0106508	0.126332	0.881469	0.959196	468.905	0.0312179	0.158201	0.836598	0.912969	5.87326	0.552164	0.844579	0.271868	0.442807
ENSMUSG00000055197	Fev	6.68908	0.0664637	0.291136	0.323231		4.24649	0.00250658	0.153019	0.87653		5.38489	0.0424806	0.479128	0.792671
ENSMUSG00000006546	Cryba2	6.71601	0.0399737	0.283789	0.555344		5.03499	0.0010358	0.152859	0.954211		6.7207	0.0675693	0.469925	0.718654	0.840032
ENSMUSG00000047021	Ccdc108	19.9017	0.140135	0.309338	0.205318	0.461166	13.7979	0.00270703	0.151804	0.915387		20.7265	0.281932	0.467917	0.287823	0.472142
ENSMUSG00000006538	Ihh	7.27461	0.0178548	0.280057	0.79855		3.88114	-0.0144156	0.154312	0.263463		15.0845	0.654563	0.808765	0.0514798	0.128596	2.03783	-0.338152	1.01916	0.11929
ENSMUSG00000026162	Nhej1	232.662	-0.0114523	0.174825	0.932931	0.976291	198.896	-0.107072	0.164687	0.180796	0.471523	246.256	-0.158537	0.20505	0.395933	0.586843	107.171	-0.0676372	0.424853	0.855266	0.916017
ENSMUSG00000026205	Slc23a3	37.4765	0.235888	0.344974	0.123959	0.3364	27.2545	0.007505	0.149214	0.842393		63.7529	1.46393	0.427375	6.22409e-05	0.000381247	6.3786	-0.232442	0.788071	0.604719	0.745124
ENSMUSG00000033159	Cnppd1	3575.28	-0.2186	0.0846368	0.0066736	0.0416318	3538.93	-0.0755369	0.0773538	0.258627	0.56832	3833.08	-0.358553	0.0930984	8.66431e-05	0.000511416	1068.58	-0.0621645	0.456356	0.870016	0.925611
ENSMUSG00000049339	Fam134a	233.774	0.0565106	0.173996	0.68633	0.863799	216.617	0.00750934	0.12687	0.919504	0.970403	347.454	0.751233	0.192937	3.15474e-05	0.000204288	120.734	-1.77781	0.536233	0.000169296	0.00161496
ENSMUSG00000026197	Zfand2b	158.955	0.0983319	0.200344	0.504452	0.756144	137.15	-0.019589	0.135423	0.76528	0.9121	188.656	0.28491	0.219186	0.149057	0.293351	27.7573	-0.426402	0.744455	0.382152	0.554185
ENSMUSG00000026198	Abcb6	15.2562	0.00966999	0.272052	0.917614	0.971274	13.4402	-0.00428637	0.151556	0.867847		24.0593	0.392481	0.511311	0.168034	0.319928	1.9457	0.29491	0.961491	0.234306
ENSMUSG00000033124	Atg9a	512.483	-0.229203	0.151357	0.077287	0.247019	502.836	-0.0850231	0.125345	0.303714	0.616429	650.132	0.0857327	0.14318	0.533726	0.706652	219.343	-0.667981	0.591966	0.153927	0.300097
ENSMUSG00000026199	Ankzf1	174.422	0.285114	0.225526	0.0837044	0.260595	134.421	-0.0334376	0.13869	0.609243	0.835576	184.136	0.223403	0.221847	0.262384	0.44229	30.9501	-0.839811	0.609854	0.0830642	0.195328
ENSMUSG00000026200	Glb1l	26.8356	0.157715	0.318233	0.177506	0.423118	17.5129	-0.00155488	0.150646	0.956719		31.7728	0.59092	0.524087	0.0691909	0.163113	10.9354	-0.141795	0.761163	0.750879	0.848537
ENSMUSG00000026201	Stk16	69.8925	0.0778012	0.235931	0.587228	0.80774	72.7313	0.0708859	0.162036	0.2319	0.536167	104.712	0.773396	0.311743	0.0034421	0.0133325	280.465	-0.416625	0.341747	0.187357	0.343804
ENSMUSG00000026202	Tuba4a	842.965	0.053843	0.117399	0.61408	0.824385	792.852	0.0260499	0.103116	0.735753	0.900117	823.875	-0.325405	0.12248	0.00599232	0.0215626	343.641	0.446925	0.394504	0.211311	0.373605
ENSMUSG00000096094	A630095N17Rik	8.87202	0.0337957	0.279888	0.66218	0.851446	9.62289	0.0153554	0.15341	0.479264		11.9003	0.22814	0.491767	0.33038	0.519797	3.56459	0.580986	1.20235	0.0350551	0.104801
ENSMUSG00000026203	Dnajb2	94.7985	0.164487	0.246091	0.289097	0.564897	78.6137	-0.000705835	0.14257	0.987363	0.996294	98.7211	0.122246	0.278008	0.600296	0.75716	19.6516	-0.0548899	0.612774	0.902941	0.946168
ENSMUSG00000026204	Ptprn	15.3256	0.00198736	0.2712	0.985525	0.994502	12.6052	-0.0132952	0.152333	0.61093		19.2871	0.10772	0.419631	0.661061	0.800021	11.3957	7.09112	2.81041	8.87888e-06	0.000141284
ENSMUSG00000033061	Resp18	2.47739	0.0520085	0.293273	0.158821												1.90078	0.24467	0.937558	0.394015
ENSMUSG00000026209	Dnpep	136.74	-1.34078	0.28641	1.82633e-07	5.80665e-06	159.386	-0.151842	0.220915	0.0688692	0.268651	160.718	-1.11295	0.275911	8.16337e-06	5.9648e-05	169.254	0.172363	0.392034	0.630106	0.762974
ENSMUSG00000026208	Des	6.87803	-0.0362461	0.283133	0.587729		9.29367	0.00929295	0.152546	0.681438		5.16341	-0.407288	0.734944	0.0314092
ENSMUSG00000026207	Speg	23.6249	-0.0207703	0.262663	0.84776	0.941643	21.2904	-0.0136197	0.150824	0.681381		29.5008	0.0869179	0.380851	0.734413	0.85136	8.9799	0.136275	0.709099	0.772691	0.86332
ENSMUSG00000033021	Gmppa	30.5789	0.0203683	0.257022	0.864905	0.949556	33.4677	0.0346622	0.153552	0.394548		39.438	0.255084	0.384532	0.342338	0.53217	11.8962	1.62914	0.996874	0.0159545	0.0586862
ENSMUSG00000033007	Asic4	9.36974	0.00564132	0.276985	0.944455	0.980711	9.05283	0.00222199	0.152355	0.918409		13.6902	0.190978	0.473151	0.410925	0.600818
ENSMUSG00000032997	Chpf	65.8202	0.186559	0.277252	0.230121	0.494429	61.1667	0.0550745	0.156319	0.305397	0.617209	68.9077	0.185556	0.317581	0.458429	0.644087	7.12691	0.528264	0.977249	0.234122	0.401116
ENSMUSG00000026211	Obsl1	15.8903	0.211754	0.378432	0.0628162	0.215192	8.60263	0.00442613	0.152297	0.843282		12.5777	0.185749	0.474066	0.417377	0.606675
ENSMUSG00000051703	Tmem198	16.9888	-0.110636	0.29558	0.279977	0.555161	18.1263	-0.0153952	0.151633	0.616747		19.719	-0.236971	0.452193	0.355894	0.546418
ENSMUSG00000026213	Stk11ip	108.895	0.571985	0.334993	0.0108088	0.0602976	105.751	0.509088	0.44213	0.00810727	0.065338	146.728	1.09812	0.278266	1.30724e-05	9.17265e-05	65.6324	-2.92137	0.525725	2.73421e-09	1.20286e-07
ENSMUSG00000006576	Slc4a3	56.0145	0.133146	0.260892	0.358974	0.635136	47.7865	0.0082617	0.147343	0.850077		68.7854	0.423698	0.365379	0.124258	0.25575	9.70239	-3.02019	1.55573	0.00334551	0.0176856
ENSMUSG00000083244	Gm15180	2.52648	0.0164959	0.285604	0.706548
ENSMUSG00000100553	Gm17751	1189.82	-0.368864	0.111462	0.00034942	0.00382396	1167.31	-0.219417	0.116161	0.0152726	0.100297	1207.18	-0.729292	0.120849	5.22102e-10	7.48885e-09	2120.89	1.44931	0.369973	2.71288e-05	0.000360948
ENSMUSG00000026235	Epha4	1070.36	-0.0741251	0.10836	0.459036	0.721947	1109.59	0.121432	0.104145	0.132923	0.398164	1117.48	-0.284127	0.109909	0.00792703	0.0273088	159.798	0.654722	0.413761	0.0778034	0.186264
ENSMUSG00000099141	Mir6352	5.44083	-0.0957457	0.306474	0.0996859		6.35606	-0.0160531	0.153953	0.384073		8.96026	-0.0828986	0.461662	0.680174	0.813418
ENSMUSG00000101849	Gm28386	13.5567	0.112418	0.302231	0.22806	0.492574	15.8769	0.0538049	0.165164	0.0682109		11.2453	0.0817326	0.448895	0.709834	0.833262
ENSMUSG00000102052	Gm28387	12.8913	0.0267877	0.27464	0.763187	0.900917	10.469	-0.00493265	0.151982	0.835066		14.5378	0.0799171	0.433703	0.731562	0.849506	11.7093	1.9475	1.2889	0.0129854	0.0502668
ENSMUSG00000004872	Pax3	42.451	0.839094	0.610468	0.00798496	0.0479218	22.5375	-0.0034899	0.149804	0.916215		38.1556	0.518538	0.459584	0.0904226	0.200106	40.709	-0.120109	0.538274	0.781635	0.869377
ENSMUSG00000118426		35.9999	0.0024793	0.253769	0.985927	0.994502	36.3318	0.011746	0.149474	0.756749		37.6898	-0.0925213	0.374296	0.713127	0.836179
ENSMUSG00000032908	Sgpp2	25.5071	0.283015	0.433283	0.0583484	0.204862	20.1816	0.0373533	0.156721	0.259941		21.9909	0.225856	0.441808	0.382874	0.573941	25.0526	0.435198	0.630401	0.36279	0.535747
ENSMUSG00000099561	Gm28410	2.62508	0.0187091	0.285699	0.673335
ENSMUSG00000026245	Farsb	1938.96	-0.266847	0.103097	0.00542163	0.0353416	1879.39	-0.164566	0.101095	0.0417889	0.197083	1819.2	-0.913975	0.0996658	1.08944e-20	4.77618e-19	723.289	0.203967	0.361538	0.537056	0.690791
ENSMUSG00000090486	BC035947	18.4384	3.64015	1.00734	2.79722e-05	0.000470426	3.9409	0.0153661	0.154325	0.285682		24.255	3.98109	0.926969	2.55102e-06	2.05986e-05	3.93442	-0.364771	0.926257	0.34422	0.518604
ENSMUSG00000012187	Mogat1	25.4151	0.0472319	0.266281	0.672609	0.85671	19.2492	-0.0173441	0.151852	0.579294		23.0161	-0.138228	0.411701	0.581388	0.743707	12.8074	-0.845321	0.831264	0.121607	0.255299
ENSMUSG00000099364	5730419F03Rik	16.7547	0.00959618	0.268859	0.925439	0.97431	14.8084	-0.00446053	0.151242	0.869634		24.6866	0.328143	0.467646	0.234603	0.408138
ENSMUSG00000032883	Acsl3	2119.77	-0.138495	0.102363	0.146067	0.375304	2116.76	0.00252686	0.0819055	0.96066	0.986559	2315.39	-0.217986	0.0899271	0.0136408	0.0432896	607.004	0.0206305	0.253646	0.934857	0.963297
ENSMUSG00000079470	Utp14b	5515.25	-0.135949	0.100599	0.148543	0.379312	5544	0.0169889	0.0878532	0.816853	0.933108	7214.77	0.281702	0.0923521	0.0018614	0.00780942	861.088	-0.372406	0.258698	0.132777	0.271642
ENSMUSG00000099377	Gm6159	6.27693	0.0367176	0.284058	0.569897		4.35005	-0.000839275	0.153086	0.952409		5.98643	0.0434161	0.472504	0.806664
ENSMUSG00000050711	Scg2	18.2453	-0.181706	0.341709	0.113005	0.317706	22.9024	-0.00573991	0.149865	0.864869		18.6661	-0.87722	0.800793	0.0272238	0.0763255
ENSMUSG00000054702	Ap1s3	165.195	0.0520457	0.189653	0.719278	0.87985	144.411	-0.0340713	0.137601	0.610811	0.836646	184.225	0.0737784	0.213536	0.704562	0.829306	54.9451	-0.258646	0.490567	0.532779	0.687134
ENSMUSG00000073643	Wdfy1	164.861	-0.0588695	0.192203	0.681305	0.860721	153.246	-0.0399577	0.138003	0.558522	0.808187	182.939	-0.103147	0.220628	0.601725	0.758478	18.751	-0.399762	0.670338	0.404963	0.5764
ENSMUSG00000026248	Mrpl44	181.843	-0.299578	0.2236	0.0689333	0.229754	186.203	-0.0482813	0.13861	0.492953	0.767111	190.685	-0.583732	0.237986	0.00583998	0.0211365	243.749	-0.699838	0.481794	0.0905644	0.207612
ENSMUSG00000026249	Serpine2	800.042	-0.440823	0.134302	0.000288564	0.00328054	773.71	-0.329847	0.145635	0.00292001	0.0308833	786.357	-0.956981	0.139512	1.42112e-12	2.77649e-11	224.28	0.324686	0.4493	0.411969	0.583268
ENSMUSG00000067106	Gm5529	5.0717	-0.0784471	0.298865	0.154532		5.48842	-0.0122564	0.153833	0.407744		7.04897	-0.137677	0.489347	0.454412	0.640696
ENSMUSG00000100397	Gm28071	4.99082	-0.0200172	0.28409	0.707645		7.67647	0.0139911	0.153338	0.502654		9.26927	0.169614	0.484383	0.424214	0.612764	5.41068	-0.498883	0.983501	0.231255	0.397804
ENSMUSG00000096297	Gm23934	5.35354	0.0232526	0.282734	0.706194		4.67435	0.00342881	0.152977	0.837916		4.97097	0.00450115	0.474105	0.981302
ENSMUSG00000099552	9830004L10Rik	1682.82	-0.138788	0.0991997	0.134788	0.356153	1691.23	0.0154485	0.0861309	0.830106	0.938078	1786.73	-0.306547	0.0976795	0.00134645	0.0058745	945.398	0.838085	0.289646	0.00229419	0.0131176
ENSMUSG00000043230	Fam124b	47.3979	-0.120422	0.264338	0.386296	0.659462	49.4548	-0.00837946	0.145866	0.856745		70.0269	0.28055	0.32022	0.26893	0.449284	10.5252	1.58493	1.09015	0.0225613	0.0763638
ENSMUSG00000101257	2310015K22Rik	153.939	-0.225189	0.223709	0.157937	0.393285	147.459	-0.0876627	0.1584	0.23462	0.540661	171.086	-0.313085	0.230705	0.126443	0.259093	65.3891	1.54593	0.529648	0.000876782	0.00612601
ENSMUSG00000103404	RP24-193D9.2	10.7678	0.189027	0.372057	0.0318152	0.133046						15.9187	1.96877	1.04452	0.00314539	0.0123281
ENSMUSG00000004364	Cul3	4547.75	-0.0452468	0.0863102	0.581665	0.804824	4709.85	0.16264	0.0924941	0.0334636	0.170449	5768.22	0.293415	0.0838195	0.000380618	0.00192299	2671.51	-1.65633	0.530297	0.000365448	0.00302896
ENSMUSG00000103076	RP24-193D9.4	58.6169	0.0345286	0.239065	0.800893	0.919886	42.4151	-0.080045	0.175389	0.104895		58.6245	-0.148877	0.333711	0.554359	0.722174	9.66296	-0.992228	1.03471	0.0876169	0.202945
ENSMUSG00000103525	RP24-193D9.3	34.203	0.0769301	0.263442	0.53838	0.778928	30.4225	0.0107188	0.149033	0.783958		31.3912	-0.105186	0.38036	0.677804	0.81231	11.0245	-0.503659	0.718208	0.308363	0.481901
ENSMUSG00000101722	Gm29125	331.394	-0.92192	0.208018	8.71835e-07	2.31435e-05	395.387	-0.0801593	0.127757	0.328319	0.638991	339.543	-1.39062	0.193372	7.17935e-14	1.63471e-12	17.1309	-0.504866	0.743994	0.311056	0.484866
ENSMUSG00000038608	Dock10	196.94	-0.251972	0.222694	0.118126	0.32649	209.112	-0.00989341	0.129724	0.888326	0.960673	223.159	-0.285851	0.221026	0.149218	0.293536	9.29883	-0.0628139	0.68213	0.890872	0.939779
ENSMUSG00000054976	Nyap2	165.053	-0.0352334	0.187952	0.805845	0.922469	141.708	-0.0956352	0.165196	0.196034	0.490376	158.443	-0.473022	0.247085	0.0289596	0.0802746	22.916	0.615761	0.772945	0.234171	0.401163
ENSMUSG00000055980	Irs1	25.6904	-0.0861064	0.28052	0.424545	0.692961	21.0746	-0.0510186	0.162888	0.115585		28.9329	-0.233457	0.423629	0.376009	0.56705	5.48373	0.606509	0.895404	0.231858	0.398406
ENSMUSG00000026142	Rhbdd1	113.787	0.0832953	0.212621	0.572393	0.798789	113.895	0.0708416	0.15473	0.293009	0.606643	120.923	0.0182452	0.25322	0.937012	0.967942	62.5874	-0.273858	0.403593	0.449587	0.617855
ENSMUSG00000104493	RP23-430H22.1	4.76676	0.0187579	0.283732	0.73227							4.69128	0.0178117	0.47933	0.911056
ENSMUSG00000100786	Gm28940	864.266	-0.0973836	0.117364	0.362367	0.638323	814.257	-0.0800996	0.106597	0.315579	0.627051	879.432	-0.395731	0.120251	0.000680519	0.00320673	80.3788	0.105085	0.48795	0.804344	0.88396
ENSMUSG00000096779	Gm22112	65.8308	0.249959	0.304568	0.136787	0.360016	48.6747	-0.00929496	0.146028	0.840546		66.4191	0.202036	0.31847	0.421055	0.610107	16.4538	-0.174947	0.597575	0.702472	0.814317
ENSMUSG00000067158	Col4a4	6.17049	0.00396303	0.280376	0.954389		5.74653	4.50012e-05	0.152763	0.99926		7.88178	0.0776385	0.465616	0.694826	0.823622
ENSMUSG00000079465	Col4a3	345.587	-0.114244	0.157931	0.388055	0.660957	326.752	-0.0686655	0.129003	0.388413	0.69119	339.734	-0.540256	0.180644	0.00134912	0.00588379	45.3125	0.723038	0.562877	0.115104	0.245617
ENSMUSG00000097564	C430014B12Rik	5.97031	0.0118501	0.281042	0.855261		6.31408	0.00801799	0.152978	0.670497		8.64017	0.173682	0.488916	0.406089	0.596044	5.08881	0.431578	0.891065	0.340822	0.515228
ENSMUSG00000026150	Mff	5666.72	-0.0592319	0.0852282	0.464742	0.725715	5468.53	-0.00539115	0.0731008	0.932273	0.975406	6064.54	-0.190393	0.0830307	0.0199478	0.0591283	1947.3	1.57386	0.337192	8.09681e-07	1.82173e-05
ENSMUSG00000100744	Gm17764	5.57542	0.0787161	0.298008	0.187014		3.79896	0.0101326	0.153646	0.483347
ENSMUSG00000026159	Agfg1	2299.53	-0.403465	0.0937142	5.83104e-06	0.000124102	2247.58	-0.279355	0.0951041	0.000655949	0.0101128	2492.35	-0.519663	0.0873594	1.47121e-09	1.97356e-08	378.555	0.562567	0.386273	0.10923	0.236977
ENSMUSG00000101784	Gm7553	12.0748	0.125352	0.311604	0.167004	0.407469	12.2321	0.0369376	0.158394	0.140112		12.7137	0.313992	0.536958	0.20639	0.372568
ENSMUSG00000038496	Slc19a3	3673.62	0.12762	0.10805	0.200844	0.454521	3284.3	-0.00873238	0.0948616	0.907307	0.96515	4259	0.236465	0.105031	0.0212416	0.0621919	925.527	-3.9972	0.54809	2.2704e-14	3.21588e-12
ENSMUSG00000100432	Gm7539	50.9604	-0.00782988	0.241069	0.950632	0.982808	43.5416	-0.0315524	0.150595	0.488641		49.4105	-0.270675	0.361283	0.306716	0.494846
ENSMUSG00000053161	Daw1	505.496	-0.158672	0.142465	0.200131	0.453599	529.781	0.0506974	0.112409	0.521686	0.78668	483.046	-0.70888	0.153399	1.32147e-06	1.11942e-05	214.126	1.60872	0.507936	0.000355181	0.00296068
ENSMUSG00000101896	Gm6244	22.2446	-0.107609	0.287064	0.339312	0.616579	26.1196	0.00345843	0.149252	0.926526		24.4635	-0.290995	0.449838	0.28172	0.46483	2.72427	-0.054702	0.858177	0.872398
ENSMUSG00000026163	Sphkap	5.32015	-0.0503151	0.289925	0.328221		4.12195	-0.0209184	0.155476	0.108039		5.30572	-0.223289	0.547642	0.179258
ENSMUSG00000100580	4933436I20Rik	3.37728	0.00391796	0.284713	0.933041							2.97707	-0.0372506	0.491312	0.766907		1.71522	0.12778	0.884491	0.69128
ENSMUSG00000094946	Gm25754	4.19999	-0.00575065	0.283209	0.91057		4.91134	0.00500891	0.153063	0.760298
ENSMUSG00000045658	Pid1	556.86	-0.426131	0.148081	0.00116059	0.0103071	623.086	0.0244402	0.105521	0.751082	0.907133	613.599	-0.501874	0.147531	0.000358529	0.0018224	142.518	0.802846	0.407515	0.028902	0.0913421
ENSMUSG00000101934	Gm18304	43.1523	-0.109964	0.266097	0.413494	0.68399	40.438	-0.0344847	0.152576	0.422478		43.482	-0.460915	0.424583	0.115163	0.241511
ENSMUSG00000036766	Dner	172.214	-0.743751	0.256787	0.000396024	0.00424564	176.649	-0.24432	0.284833	0.0330691	0.169393	188.34	-0.88425	0.236728	4.3e-05	0.000272525	60.4718	-0.459453	0.460385	0.250646	0.419138
ENSMUSG00000104396	RP23-147I4.1	12.2298	-0.120208	0.309387	0.174283	0.418719	10.3909	-0.0395674	0.159915	0.0757012		13.936	-0.340174	0.547515	0.183752	0.341633
ENSMUSG00000102481	RP24-208F6.1	5.14983	0.0578512	0.291154	0.303171							3.20193	0.0088404	0.486746	0.950052
ENSMUSG00000026219	Trip12	84066.1	-0.469523	0.0869982	2.03644e-08	8.22095e-07	87655	-0.150728	0.0678445	0.0137081	0.0939151	88347.6	-0.700677	0.0736779	6.95629e-22	3.38399e-20	4345.06	0.0794494	0.258001	0.757687	0.853556
ENSMUSG00000103505	RP23-447L15.2	22.3605	0.000688034	0.264266	0.997355	0.998601	18.7199	-0.0161694	0.151798	0.596887		22.5893	-0.123141	0.411926	0.618226	0.770472	3.90043	0.29881	0.89556	0.442137	0.611028
ENSMUSG00000104503	RP23-447L15.3	116.125	0.0379771	0.210529	0.794701	0.917217	122.483	0.0758522	0.15911	0.255122	0.564853	122.364	-0.0745056	0.248809	0.729197	0.847572	124.733	2.57917	0.411772	4.71487e-11	3.28933e-09
ENSMUSG00000073633	Fbxo36	245.481	0.231956	0.190761	0.121489	0.332526	225.548	0.0914733	0.148039	0.255923	0.565763	271.327	0.264487	0.186659	0.12684	0.259687	161.325	-1.41767	0.350964	1.57521e-05	0.000227954
ENSMUSG00000026220	Slc16a14	11.7061	0.0943714	0.296242	0.268131	0.542789	11.4023	0.0284834	0.155772	0.244264		12.5374	0.259834	0.503858	0.280391	0.463165	9.70732	-1.69211	1.11698	0.0168043	0.0609487
ENSMUSG00000118590		16.6603	0.0350697	0.274065	0.707225	0.874012	11.6948	-0.0179611	0.153201	0.480078		28.047	0.724826	0.59748	0.0409083	0.107084	2.67144	-0.116587	0.869255	0.732157
ENSMUSG00000099693	Gm29284	30.2172	-0.293181	0.423656	0.0646835	0.219898	28.6161	-0.0707873	0.172402	0.0817894		34.8693	-0.52684	0.491151	0.0884094	0.196704	51.3064	-1.67995	0.71308	0.00317048	0.0169174
ENSMUSG00000052477	C130026I21Rik	1264.97	0.0978265	0.116435	0.358567	0.634849	1260.9	0.171952	0.129864	0.0623393	0.252664	1327.63	-0.0620524	0.121793	0.599251	0.756476	550.956	-0.973027	0.470193	0.0175777	0.0629841
ENSMUSG00000064281	Rpl19-ps1	12.1059	3.65854	1.37133	0.000648757	0.00643728	3.82558	0.0207676	0.155419	0.115463		28.4546	5.15914	1.09663	1.10233e-06	9.48187e-06
ENSMUSG00000118640		20.9005	0.2521	0.423986	0.045004	0.171386	10.2525	0.00026934	0.151949	0.993688		22.9709	0.852334	0.721887	0.0290139	0.0804114	2.2508	-0.177697	0.891379	0.581912
ENSMUSG00000061852	Gm7582	4.03139	0.0863108	0.304878	0.0536176							3.48811	0.220526	0.561451	0.0955112
ENSMUSG00000089976	Gm2389	3.43949	0.0793124	0.30326	0.0171523							4.64595	0.416029	0.779547	0.00576408		2.78911	0.0608042	0.834725	0.875079	0.929306
ENSMUSG00000101279	Gm18342	41.5058	-0.00812007	0.246301	0.947277	0.981685	43.2395	0.0227713	0.148559	0.618286		53.4355	0.218505	0.341249	0.398539	0.589098	35.9393	-0.497693	0.636968	0.298308	0.470991
ENSMUSG00000089844	A530032D15Rik	582.675	0.246986	0.138598	0.0430377	0.166222	551.198	0.179855	0.150023	0.0645494	0.257307	568.843	-0.0783058	0.139331	0.557781	0.72502	441.512	0.289335	0.417853	0.441057	0.610021
ENSMUSG00000073631	Gm10553	42.4504	0.237788	0.347593	0.120001	0.330171	34.3901	0.0277888	0.151967	0.478813		32.3342	-0.09788	0.386749	0.696992	0.825068	20.6253	-1.29211	0.720347	0.0188811	0.0665321
ENSMUSG00000072109	A530040E14Rik	1042.46	-0.0327668	0.112859	0.75123	0.894689	1073.4	0.138255	0.110842	0.0995994	0.336291	1012.7	-0.462454	0.118381	5.64021e-05	0.000348823	121.647	-1.86548	0.442971	4.84058e-06	8.48214e-05
ENSMUSG00000090128	Gm16038	10.4409	0.178563	0.359741	0.0418914	0.162927	6.48287	0.0195655	0.154534	0.29899		12.1897	0.968083	1.1881	0.0234673	0.0676695
ENSMUSG00000089716	Gm6264	2198.65	0.335928	0.0938861	0.00015505	0.00196034	1984.39	0.157872	0.122404	0.0763014	0.285336	2005.35	-0.208224	0.0916991	0.0206991	0.0609399	226.556	0.339053	0.38229	0.332422	0.506746
ENSMUSG00000079457	Gm7609	4.53444	-0.00585149	0.282935	0.910971							10.1134	0.365304	0.600162	0.132095	0.268373
ENSMUSG00000090252	Gm16028	76.4385	-0.689402	0.402144	0.0071866	0.0441126	88.8017	-0.0370952	0.146266	0.518496	0.784094	75.1304	-1.43169	0.392397	2.77025e-05	0.000181716	19.2857	-0.841886	0.714711	0.106563	0.232998
ENSMUSG00000079455	Gm16026	2973.04	-0.0159945	0.0943712	0.862024	0.948393	2844.9	0.01016	0.0852884	0.887239	0.960571	2961.43	-0.36182	0.101076	0.000248811	0.00131832	618.952	-3.1009	0.394792	3.69139e-16	7.34232e-14
ENSMUSG00000089652	Gm16025	5.15938	0.027688	0.284487	0.622151		6.05301	0.0142445	0.153892	0.394191		9.69466	0.362473	0.622513	0.107068	0.228322
ENSMUSG00000089937	Gm7281	2.80969	0.0039218	0.284555	0.933279												3.26275	-0.133883	0.819982	0.739166	0.840388
ENSMUSG00000118591		15.9907	0.20619	0.373258	0.0648246	0.220171	7.76516	-0.00132637	0.152353	0.946995		20.3772	1.07321	0.81972	0.0160627	0.0494734
ENSMUSG00000101751	Gm2427	24.057	-0.0181419	0.262066	0.867148	0.950089	22.343	-0.0084918	0.150195	0.799641		28.5823	0.0360479	0.383326	0.888433	0.942389	12.8343	-0.472478	0.754389	0.335806	0.510037
ENSMUSG00000089714	Gm16092	7.41094	-0.0171261	0.280793	0.793247		6.14694	-0.00982288	0.153359	0.556513		7.20264	-0.133163	0.487468	0.471087	0.655518
ENSMUSG00000118607		120.693	1.72399	0.308929	1.47273e-09	7.87262e-08	71.2196	0.207522	0.358392	0.0214018	0.126457	138.134	1.77974	0.300038	2.79695e-10	4.16573e-09	8.25687	-0.576478	0.795986	0.258643	0.42833
ENSMUSG00000070034	Sp110	5513.12	-0.0476156	0.0783286	0.526784	0.77122	5451.35	0.0593263	0.0736089	0.359424	0.665217	5353.45	-0.490909	0.081468	9.69704e-10	1.33626e-08	551.152	-2.17814	0.300725	6.91245e-14	8.8522e-12
ENSMUSG00000090103	Gm16094	44.7924	-0.0751754	0.253307	0.569115	0.797547	39.317	-0.0449473	0.155851	0.314129		42.059	-0.563788	0.448671	0.0667383	0.158452	2.24721	0.0445533	0.857164	0.901071
ENSMUSG00000070031	Sp140	602.833	0.143745	0.136256	0.231302	0.496051	560.728	0.0732662	0.114329	0.364512	0.669469	614.045	-0.0725055	0.137784	0.583542	0.745367	167.355	-0.430509	0.313773	0.143434	0.286148
ENSMUSG00000073628	Gm10552	45.3131	-0.192099	0.303354	0.194042	0.444825	48.5461	-0.0201409	0.147387	0.66554		43.0585	-0.994029	0.503664	0.00663448	0.0235106	10.9638	-1.36035	0.915639	0.028557	0.0905119
ENSMUSG00000090246	Gm17017	12.6498	-0.0898649	0.293802	0.297016	0.57368	11.3681	-0.0307748	0.156517	0.197463		14.2935	-0.29109	0.506682	0.247947	0.424804
ENSMUSG00000026222	Sp100	61.9847	0.0625195	0.241582	0.651298	0.846292	55.5312	0.00288601	0.14567	0.952709	0.983875	78.0723	0.347245	0.326533	0.177829	0.33367	20.1029	0.466888	0.640365	0.332749	0.507001
ENSMUSG00000052760	A630001G21Rik	62.1922	1.25111	0.454798	0.000328543	0.0036569	38.5057	0.0495886	0.158523	0.254837		69.817	1.32045	0.424197	0.000213337	0.0011477	118.676	0.0584813	0.47462	0.889553	0.93897
ENSMUSG00000100217	9930111H07Rik	6.93879	0.0930757	0.30284	0.155737		4.91177	0.0128416	0.153782	0.423811		6.49436	0.207368	0.523874	0.265092	0.445268	12.368	-2.2085	1.61964	0.010193	0.0418475
ENSMUSG00000036707	Cab39	4667.44	-0.0555304	0.0788327	0.463711	0.725502	4595.37	0.0425498	0.0733797	0.509712	0.778296	5317.1	-0.00383059	0.0774806	0.959274	0.979407	1160.43	-0.197319	0.268906	0.441202	0.610099
ENSMUSG00000026223	Itm2c	22.4304	0.0553906	0.269736	0.612097	0.823361	22.8491	0.0256031	0.152921	0.45282		25.5891	0.154828	0.415932	0.543724	0.713837	9.00273	-0.208332	0.690305	0.658618	0.783452
ENSMUSG00000099767	Gm28884	4.46535	0.0882174	0.304922	0.0754571
ENSMUSG00000049608	Gpr55	8.18104	0.10803	0.308174	0.143953		3.14769	-0.00458571	0.153305	0.735612		13.9136	1.51298	1.12444	0.00876539	0.0298658
ENSMUSG00000099342	Gm18180	10.288	0.0783123	0.294084	0.275282	0.550224	6.08058	0.000478071	0.152882	0.98031		11.9166	0.266824	0.537412	0.219599	0.388922	4.75258	-5.13075	3.15508	0.00166213	0.0102092
ENSMUSG00000026226	Spata3	3.35693	0.0135064	0.284418	0.784925							6.95832	0.272192	0.563351	0.16728	0.318856
ENSMUSG00000026227	2810459M11Rik	28.445	1.14085	0.765927	0.00468338	0.0314325	15.2735	0.0176741	0.152517	0.539154		27.8547	0.957456	0.657425	0.0170368	0.051966	4.44659	-1.32315	1.92577	0.0347495	0.104171
ENSMUSG00000026229	Psmd1	1697.06	0.124315	0.100966	0.18798	0.436675	1605.66	0.0997101	0.096417	0.194452	0.488253	1763.01	-0.0653114	0.0981639	0.496659	0.676132	542.438	-0.186784	0.417508	0.613762	0.751212
ENSMUSG00000077274	Gm22786	7.10648	0.0019855	0.279978	0.979071		6.98483	0.00189002	0.152601	0.924427		5.81839	-0.146683	0.499357	0.399994		2.77957	0.107494	0.866235	0.75648	0.852985
ENSMUSG00000026228	Htr2b	5.16768	-0.0121752	0.282269	0.832527		8.16504	0.0200192	0.15433	0.339053		8.68873	0.166694	0.486528	0.422867	0.611548
ENSMUSG00000103272	RP24-308M3.2	5.33698	-0.00491359	0.282014	0.930831		5.4872	0.00111808	0.152839	0.951149		7.75716	0.0925121	0.471699	0.633229	0.781652	1.74647	0.12518	0.882312	0.699674
ENSMUSG00000062590	Armc9	98.6904	-0.0697324	0.216744	0.631648	0.834231	104.115	0.0320458	0.141955	0.604557	0.832983	113.462	-0.0501105	0.254031	0.81783	0.901964	66.3635	-1.36777	0.70438	0.0124241	0.0485768
ENSMUSG00000087538	Gm16341	14.3954	0.0110679	0.271448	0.906823	0.966982	15.9101	0.0189628	0.152632	0.518542		27.84	0.872375	0.638286	0.0235163	0.0677817	11.8828	-1.41892	1.07056	0.0305255	0.0950086
ENSMUSG00000079445	B3gnt7	317.307	-0.104197	0.163815	0.438774	0.705059	303.027	-0.0451571	0.127564	0.551228	0.804644	345.673	-0.200155	0.1738	0.218296	0.387467	103.553	1.79363	0.702949	0.00172822	0.0105446
ENSMUSG00000101853	Gm28627	2.47649	0.0485217	0.292575	0.168492
ENSMUSG00000026234	Ncl	12600.5	-0.219291	0.0764305	0.00173797	0.0143476	13241.8	0.0572792	0.0686602	0.352901	0.659406	15235.7	-0.00389428	0.0733983	0.955756	0.978127	2154.52	-0.238655	0.279628	0.368941	0.541391
ENSMUSG00000073627	C130036L24Rik	159.183	0.303669	0.238283	0.0732619	0.238832	118.672	-0.0427455	0.143104	0.505215	0.775522	176.523	0.374799	0.228655	0.0665125	0.157981	52.533	0.855529	0.451773	0.0319038	0.0980577
ENSMUSG00000026237	Nmur1	3.15584	0.0203284	0.285869	0.647949		3.50285	0.0084871	0.153652	0.509485		3.1129	0.0426826	0.490581	0.747592		1.96799	-0.556787	1.16474	0.062442
ENSMUSG00000036574	1700019O17Rik	7.18814	0.111211	0.312329	0.102254		6.97954	0.0267094	0.156408	0.120695		5.21352	0.147761	0.503275	0.387292
ENSMUSG00000101328	Rpl30-ps6	8.3292	-0.00412972	0.279511	0.948717		8.27608	0.00226036	0.152275	0.919754		9.992	0.0328754	0.449877	0.877058	0.936608	2.06531	-0.227187	0.90458	0.487984
ENSMUSG00000026238	Ptma	3946.94	0.0837108	0.0921573	0.338147	0.615193	4414.63	0.497428	0.0975556	3.20599e-08	3.05298e-06	5222.16	0.522355	0.0885217	1.97564e-09	2.60207e-08	1272.55	-0.264677	0.302091	0.352185	0.526727
ENSMUSG00000026239	Pde6d	260.797	-0.0114435	0.165344	0.931352	0.975838	235.246	-0.049927	0.135787	0.49316	0.767159	234.364	-0.68197	0.208647	0.000377501	0.00190813	146	0.612537	0.473221	0.134864	0.274349
ENSMUSG00000102927	RP23-11K8.3	7.51433	0.00293664	0.278776	0.969619		4.53581	-0.0171038	0.154536	0.252409		6.72226	-0.104586	0.477465	0.575889	0.739894	2.54194	0.151086	0.897823	0.621123
ENSMUSG00000026240	Cops7b	474.094	0.310365	0.152318	0.0184721	0.0895982	415.899	0.0817179	0.125279	0.321204	0.631901	503.69	0.219515	0.147798	0.120188	0.249472	243.247	-1.28216	0.340244	5.69261e-05	0.000671513
ENSMUSG00000103609	RP23-11K8.4	3.24615	0.067295	0.29753	0.0958269
ENSMUSG00000026241	Nppc	6.24217	0.0315223	0.282736	0.633722		5.52582	0.00518606	0.152952	0.767561		9.06886	0.197434	0.512435	0.312518	0.50138	13.2128	0.0594659	0.657637	0.901499	0.9456
ENSMUSG00000053333	Dis3l2	419.998	-0.495185	0.167041	0.000666319	0.00657133	436.265	-0.121147	0.143486	0.168326	0.454249	407.716	-1.09258	0.168565	1.54081e-11	2.67826e-10	16.9403	-0.515978	0.814606	0.297438	0.469894
ENSMUSG00000104121	RP23-26I10.1	74.7243	1.51081	0.46238	5.6104e-05	0.000851538	65.5906	1.32663	0.463184	0.000155084	0.00324609	57.7353	0.72082	0.429687	0.0226343	0.0656856	2.36164	-0.0697566	0.86169	0.837194
ENSMUSG00000084106	Gm6136	8.32352	-0.0225016	0.280012	0.747279		11.2218	0.0143698	0.153078	0.529418		11.923	0.086167	0.453082	0.68809	0.819819	34.7202	-1.83816	0.565205	0.000198241	0.00182942
ENSMUSG00000099401	Gm28375	5.70791	-0.0548711	0.289551	0.358506		6.05004	-0.010584	0.153324	0.550449		8.82281	-0.0180826	0.455515	0.925085	0.962812	5.5359	-5.63373	3.0205	0.000653512	0.00486608
ENSMUSG00000103984	RP24-286D13.3	3.52678	-0.0262322	0.286582	0.546533		7.41556	0.0193239	0.154417	0.320078		6.04952	0.0498895	0.472236	0.781011
ENSMUSG00000101940	Akp-ps1	3.932	-0.00182608	0.284516	0.965111							4.69924	0.0158566	0.481548	0.919374
ENSMUSG00000101625	Gm29371	3.23014	-0.0124415	0.284754	0.784919							7.32711	0.23546	0.53104	0.24048	0.415547
ENSMUSG00000026246	Alppl2	1658.51	-0.212306	0.098749	0.021564	0.100381	1673.42	-0.0244069	0.0974788	0.745753	0.903645	2215.65	0.267937	0.0962556	0.00452509	0.016974	2973.22	-4.44922	0.415497	6.50247e-28	5.25084e-25
ENSMUSG00000079440	Alpi	3.48634	-0.0230763	0.28519	0.641805		4.98622	0.00439667	0.153206	0.767684		6.06411	0.0774784	0.475308	0.66963
ENSMUSG00000036500	Akp3	10.7347	0.0663174	0.288583	0.381419	0.654986	6.89769	-0.00163083	0.15251	0.932008		10.0083	0.0982882	0.464921	0.633083	0.781648	3.74635	-0.121308	0.857685	0.733061	0.835965
ENSMUSG00000026247	Ecel1	7.95513	-0.0202887	0.279467	0.776143		6.79411	-0.0108915	0.153186	0.566446		7.65045	-0.157573	0.488665	0.426662	0.615345
ENSMUSG00000036480	Prss56	30.9104	-0.124801	0.2851	0.319343	0.597018	31.6394	-0.0199243	0.150186	0.609117		31.9911	-0.459994	0.477118	0.123295	0.254123	5.25354	0.0713824	0.842259	0.851564	0.914199
ENSMUSG00000026251	Chrnd	79.3867	-0.619598	0.415605	0.0121682	0.0657509	87.1849	-0.063086	0.156954	0.287435	0.600465	94.5666	-0.529913	0.323204	0.0424676	0.110369	13.7216	0.506343	0.718459	0.312959	0.486683
ENSMUSG00000026253	Chrng	158.756	0.00868114	0.192718	0.95303	0.98295	147.033	-0.0111131	0.134532	0.864355	0.950703	172.267	-0.0556183	0.223971	0.78015	0.87953	24.4565	1.07842	0.989911	0.0700661	0.173462
ENSMUSG00000026254	Eif4e2	559.122	0.283132	0.144743	0.025229	0.112748	547.367	0.320985	0.161309	0.00578776	0.0508661	716.762	0.633879	0.154734	1.72588e-05	0.000118021	873.747	-0.207114	0.450264	0.597552	0.739749
ENSMUSG00000026255	Efhd1	130.86	0.249641	0.241426	0.132277	0.35215	109.827	0.0195365	0.138542	0.756225	0.908426	149.558	0.391765	0.245409	0.0691299	0.162999	98.6021	-1.91698	0.621145	0.000312746	0.00267249
ENSMUSG00000048000	Gigyf2	2930.59	0.290051	0.0926603	0.000940778	0.00871698	2483.84	0.00585237	0.0827312	0.934316	0.976088	3380.94	0.384174	0.0864131	6.20415e-06	4.64404e-05	639.211	-1.12452	0.312636	0.000135146	0.00135124
ENSMUSG00000079436	Kcnj13	5.3775	0.0076513	0.283578	0.884492							3.76457	-0.131333	0.505774	0.379305		12.8961	3.60279	1.11079	0.000118697	0.00120547
ENSMUSG00000026259	Ngef	399.237	-0.256725	0.158987	0.0563161	0.200219	441.231	0.071642	0.121134	0.376712	0.680008	387.326	-0.775281	0.174265	2.623e-06	2.11562e-05	22.6257	-0.423062	0.604137	0.367337	0.54007
ENSMUSG00000079434	Neu2	4.46492	0.0145711	0.283197	0.794928		4.06412	0.00313923	0.153089	0.842065		5.07769	0.0569581	0.478093	0.737326		5.20624	-0.190872	0.816861	0.647618	0.775917
ENSMUSG00000091123	Gm17181	4.91481	0.0346344	0.285486	0.544566		5.43869	0.0150186	0.153953	0.384618		3.59969	-0.0214307	0.483498	0.880586
ENSMUSG00000090994	Gm6153	3.43122	-0.0224711	0.285291	0.639924		2.81913	-0.00895071	0.153726	0.462817		3.89885	-0.0660165	0.486776	0.658065
ENSMUSG00000026288	Inpp5d	470.65	-0.497147	0.162285	0.000482315	0.00503751	491.649	-0.126457	0.133538	0.151526	0.42705	457.693	-1.08404	0.163961	6.44746e-12	1.1606e-10	34.7037	0.15762	0.605853	0.737635	0.839363
ENSMUSG00000026289	Atg16l1	973.15	-0.101834	0.117873	0.342554	0.619924	1006.48	0.0866853	0.103018	0.275653	0.587483	1135.43	0.00648473	0.115298	0.955329	0.977766	295.111	-0.5792	0.320752	0.0532804	0.142112
ENSMUSG00000087968	Gm25395	1531.35	0.066571	0.103492	0.491248	0.746979	1450.13	0.051001	0.0924845	0.493502	0.767159	1476.55	-0.360246	0.104433	0.000410623	0.00205642	18.5953	-0.204609	0.589771	0.654745	0.780775
ENSMUSG00000089281	Scarna6	1381.17	-0.0472166	0.107352	0.634433	0.835859	1345.88	0.0186333	0.0921103	0.801823	0.928121	1436.95	-0.264607	0.110696	0.0140735	0.0443775	6.40448	0.256782	0.756523	0.583005	0.728883
ENSMUSG00000056055	Sag	49.5561	1.73403	0.506908	3.00317e-05	0.000498599	28.6547	0.065979	0.169544	0.0932745		61.3821	2.00552	0.446336	5.36596e-07	4.89647e-06	10.4232	-0.342153	0.747681	0.475302	0.640208
ENSMUSG00000070738	Dgkd	2374	-0.119548	0.0899345	0.160513	0.396956	2236.89	-0.111262	0.0863527	0.123579	0.381956	2608.63	-0.177785	0.0935953	0.0534053	0.132523	266.839	-0.219709	0.409545	0.548159	0.700542
ENSMUSG00000005501	Usp40	134.088	-0.127972	0.21968	0.395585	0.667993	156.914	0.104806	0.166015	0.182231	0.472923	156.448	-0.102626	0.229029	0.613181	0.766875	33.0675	1.79787	0.605748	0.000536018	0.004143
ENSMUSG00000081984	Dnajb3	6.93671	0.108296	0.31123	0.0970889		5.02526	0.0179062	0.154565	0.263429		5.10849	0.158085	0.508863	0.345762		6.12429	-0.450993	0.860775	0.336278	0.51063
ENSMUSG00000079429	Mroh2a	326.363	0.580618	0.202185	0.000676903	0.00665548	230.079	-0.0322631	0.130577	0.654272	0.857204	420.748	0.942024	0.202184	7.22786e-07	6.43084e-06	24.0997	-0.492324	0.634837	0.306289	0.479743
ENSMUSG00000044783	Hjurp	3557.26	-0.0738163	0.102874	0.440933	0.706793	3932.27	0.301004	0.103845	0.000649044	0.0100381	4226.28	0.0918349	0.0953474	0.32766	0.517389	1283.18	-0.170114	0.305412	0.553682	0.704614
ENSMUSG00000036251	Trpm8	10.8314	-0.0242051	0.277327	0.75817	0.897953	10.0434	-0.0075626	0.152343	0.737767		11.4055	-0.0940996	0.455607	0.657628	0.797419	4.62333	-0.194324	0.828165	0.635447	0.766613
ENSMUSG00000100798	Gm19589	4.15477	0.0130767	0.284618	0.785353							4.72039	0.0456528	0.485075	0.757109
ENSMUSG00000049866	Arl4c	19.547	-0.133866	0.304536	0.22607	0.49033	21.7204	-0.0132476	0.150886	0.685104		34.1662	0.270521	0.405208	0.318926	0.508509	15.0185	0.990316	0.865802	0.0808208	0.191352
ENSMUSG00000097398	2410088K16Rik	2.7671	-0.000827259	0.284574	0.983213							2.39653	-0.0465399	0.495121	0.690453		5.433	1.82426	2.38243	0.0232122	0.0778402
ENSMUSG00000036206	Sh3bp4	854.682	-0.367892	0.130216	0.00175321	0.0144367	910.288	-0.0254507	0.097921	0.735775	0.900117	905.441	-0.575313	0.122583	1.2738e-06	1.08241e-05	68.119	0.949809	0.53806	0.0356996	0.106184
ENSMUSG00000102700	RP24-396E16.1	3.54631	-0.0158151	0.284246	0.751897		3.82088	-0.000681683	0.153138	0.959357
ENSMUSG00000101288	Gm28342	61.0119	0.0966212	0.245289	0.498523	0.751788	56.4694	0.025164	0.146957	0.619064	0.83904	54.5706	-0.244454	0.344285	0.344735	0.535066	7.24062	0.285558	0.871136	0.480416	0.64463
ENSMUSG00000099938	C030007H22Rik	4.3763	0.061371	0.292828	0.255376		3.59225	0.0116976	0.153878	0.396238		4.18516	0.111702	0.504424	0.413506
ENSMUSG00000055013	Agap1	3467.54	-0.0130093	0.0869948	0.875577	0.952782	3413.45	0.0757344	0.0800428	0.269055	0.579965	3785.28	-0.080422	0.0834383	0.32856	0.518133	163.133	0.483246	0.37052	0.15589	0.302917
ENSMUSG00000101662	Gm28499	28.7949	0.143919	0.303551	0.23486	0.500703	25.9872	0.0340406	0.154979	0.337243		22.7686	-0.0629809	0.407164	0.794647	0.888457	14.7523	0.318513	0.708635	0.510271	0.668667
ENSMUSG00000102009	4933400F21Rik	5.52555	0.0205817	0.283931	0.709635		2.33682	-0.00987169	0.154091	0.245211		4.48087	-0.0285667	0.483897	0.841641
ENSMUSG00000103252	RP24-78E16.3	4.53299	0.0336004	0.287182	0.48568							4.6879	0.0993568	0.492397	0.527331		5.50814	-5.56425	3.08389	0.000870472	0.00609496
ENSMUSG00000034486	Gbx2	1138.5	-0.104353	0.114957	0.320459	0.597956	1037.35	-0.168416	0.11831	0.0558404	0.236096	1275.36	-0.108952	0.120688	0.350539	0.540946	77.9467	1.04837	0.418504	0.00548748	0.0259877
ENSMUSG00000092627	D130058E05Rik	22.6303	0.0259357	0.264901	0.811046	0.925069	22.4159	0.0133518	0.151018	0.683305		20.5598	-0.176636	0.433931	0.476101	0.65925	8.80704	0.715409	0.89462	0.180352	0.334627
ENSMUSG00000067081	Asb18	2.87048	-0.0140144	0.284918	0.759899		2.86401	-0.00254431	0.153282	0.844223		2.66819	-0.0879036	0.499556	0.496006
ENSMUSG00000026301	Iqca	6412.12	-0.179706	0.0806684	0.0198391	0.0942916	6354.43	-0.0411449	0.0718182	0.509938	0.778296	7063.72	-0.230827	0.0765651	0.00220497	0.00905172	1010.21	0.314822	0.363495	0.348472	0.523114
ENSMUSG00000044337	Ackr3	17.3832	0.0370361	0.27175	0.70516	0.873025	16.8991	0.0140441	0.151733	0.638854		21.2196	0.19399	0.43374	0.44578	0.632817	15.7736	0.841231	0.970337	0.12413	0.258782
ENSMUSG00000101997	Gm28722	6.31251	-0.0140583	0.28081	0.827564		5.05282	-0.0108945	0.153458	0.517887		7.44518	-0.0117067	0.465083	0.946652	0.971996
ENSMUSG00000103292	RP24-393L8.1	10.5038	-0.0151583	0.276264	0.848408	0.941752	14.3053	0.0245562	0.154183	0.372447		10.5176	-0.126158	0.462556	0.557373	0.724625	9.26667	1.02921	1.68153	0.0365675	0.108249
ENSMUSG00000034432	Cops8	1233.14	-0.140238	0.113569	0.177626	0.423197	1290.7	0.0888344	0.0958065	0.245994	0.554259	1386.22	-0.142461	0.108233	0.17686	0.332454	639.623	-0.640137	0.326335	0.0352834	0.105282
ENSMUSG00000048126	Col6a3	958.302	-0.45155	0.127969	0.000113197	0.00151381	961.045	-0.226481	0.122846	0.0156306	0.101955	958.712	-0.888412	0.120816	4.66296e-14	1.08678e-12	66.2522	-0.158101	0.404501	0.662239	0.785752
ENSMUSG00000026303	Mlph	24.2367	0.0862279	0.277682	0.444267	0.70985	23.8585	0.0314145	0.154151	0.375239		26.3733	0.178454	0.411336	0.491812	0.672261	4.75318	0.862923	1.24959	0.092239	0.210025
ENSMUSG00000026304	Rab17	4.81675	-0.0163202	0.283229	0.765881		4.49364	-0.00379402	0.153249	0.781545		7.99499	0.12267	0.478909	0.527253	0.702137
ENSMUSG00000026305	Lrrfip1	14548.5	-0.147181	0.0808222	0.0563815	0.200233	15108.1	0.093125	0.0697459	0.132459	0.397681	16155.4	-0.173881	0.0695074	0.0113907	0.0372858	1187.15	0.810578	0.249321	0.000724786	0.00529349
ENSMUSG00000070732	Rbm44	1253.73	0.113068	0.111431	0.270544	0.545562	1218.76	0.150301	0.107128	0.0706518	0.272909	1487.55	0.284758	0.102652	0.00456938	0.0171253	180.228	-0.212416	0.366962	0.526726	0.682576
ENSMUSG00000100018	Gm7776	4.02368	-0.0604516	0.294818	0.148839		6.40104	-0.00022209	0.152828	0.986625		6.44263	-0.0682712	0.477033	0.68983	0.820414
ENSMUSG00000034353	Ramp1	34.0224	2.09003	0.705468	0.000145038	0.00185302	10.8528	0.00734343	0.152315	0.752799		56.5599	2.92176	0.540713	6.22518e-09	7.70442e-08	7.96308	0.327242	0.803104	0.479917	0.64415
ENSMUSG00000034343	Ube2f	182.625	0.0483688	0.184405	0.735214	0.888567	162.448	-0.0275086	0.133955	0.687914	0.875184	203.113	0.0525202	0.207027	0.783514	0.88188	163.796	-0.0999913	0.352769	0.756846	0.85325
ENSMUSG00000083064	Gm7785	12.1155	0.0901684	0.295008	0.283237	0.558607	9.19661	0.0107678	0.152647	0.638269		12.5715	0.204388	0.489007	0.365275	0.556342
ENSMUSG00000026307	Scly	79.8086	0.154686	0.255447	0.3089	0.586314	80.0053	0.0956632	0.177438	0.140301	0.411097	77.5478	-5.06834e-05	0.290566	0.997902	0.998867	17.9285	-0.576393	0.951738	0.220779	0.384863
ENSMUSG00000090322	Gm17090	7.738	0.0573551	0.286721	0.428356		4.62539	-0.00394473	0.152994	0.808532		6.15955	0.00691116	0.467451	0.971917		2.234	-0.254355	0.89447	0.48113
ENSMUSG00000049515	Espnl	9.56332	0.14156	0.332462	0.0518449	0.188821	7.05876	0.0265721	0.156213	0.149098		10.8184	0.766453	1.13578	0.0306663	0.0842605
ENSMUSG00000026308	Klhl30	61.7261	0.113171	0.259552	0.414759	0.684742	45.6036	-0.0308761	0.150935	0.486642		56.7841	-0.102576	0.334465	0.682912	0.815527	7.79509	0.341667	0.742387	0.481418	0.645505
ENSMUSG00000047443	Fam132b	45.3431	-0.10273	0.263383	0.441183	0.706937	46.3773	-0.00962591	0.147777	0.817567		54.7029	-0.0714802	0.331532	0.773547	0.876082	14.3281	-1.35157	0.859738	0.0254118	0.0829333
ENSMUSG00000026309	Ilkap	156.724	0.198003	0.214574	0.204508	0.459972	125.678	-0.0302889	0.140478	0.628388	0.843701	178.989	0.318788	0.23259	0.123466	0.254432	69.4991	0.244504	0.381404	0.484061	0.647527
ENSMUSG00000067071	Hes6	114.416	0.170288	0.24649	0.275958	0.550557	113.992	0.0948778	0.174516	0.154937	0.432196	119.185	0.111666	0.280025	0.633515	0.781959	51.3047	1.61302	0.587632	0.00124694	0.0081976
ENSMUSG00000055866	Per2	37.3141	0.277158	0.383064	0.0873705	0.268256	34.5394	0.0684016	0.169196	0.121735		52.2357	1.11036	0.461872	0.00211242	0.00873142	2.87604	0.26598	0.929715	0.404019	0.57567
ENSMUSG00000034292	Traf3ip1	51.3324	0.0760059	0.249033	0.578024	0.802741	41.4082	-0.0186941	0.148462	0.666879		55.9951	0.104711	0.327662	0.678715	0.812457	9.75019	-1.99146	1.13205	0.00806812	0.0349432
ENSMUSG00000026311	Asb1	17.3262	0.0501734	0.274051	0.613854	0.824379	11.6991	-0.017284	0.153152	0.488347		17.5293	0.0378513	0.419132	0.875718	0.935998	6.8715	-0.0232089	0.792617	0.952814	0.97391
ENSMUSG00000026313	Hdac4	187.598	0.0639547	0.18346	0.654339	0.847191	179.127	0.0375396	0.133969	0.598794	0.830766	224.401	0.243497	0.203361	0.190496	0.350748	49.5534	0.0860328	0.440565	0.827221	0.898759
ENSMUSG00000103101	RP23-309A8.4	3.77953	0.00993077	0.283972	0.84453		2.91662	-0.00202209	0.153312	0.869764		2.96904	-0.0598991	0.492855	0.643142		1.80298	0.199678	0.963195	0.254509
ENSMUSG00000026260	Ndufa10	651.45	0.167399	0.135476	0.161675	0.398395	591.655	0.0463899	0.111372	0.555785	0.806377	637.59	-0.166996	0.138635	0.211761	0.37946	235.386	0.532774	0.479073	0.19664	0.355087
ENSMUSG00000067064	Olfr1416	9.14964	0.0542336	0.285782	0.451639	0.715926	6.15346	-0.000691761	0.152784	0.965693		5.97367	-0.0877904	0.482573	0.604767		2.73293	0.301557	0.924442	0.39318
ENSMUSG00000057464	Olfr1415	3.12018	0.016509	0.285035	0.72747
ENSMUSG00000042849	Olfr1414	7.89822	-0.0155343	0.279906	0.819891		6.81195	-0.0085306	0.15308	0.636789		12.6958	0.167879	0.469041	0.456654	0.642554
ENSMUSG00000073616	Myeov2	339.012	-0.0364469	0.155129	0.779352	0.909768	326.694	-0.00148782	0.118258	0.990944	0.997257	331.624	-0.44035	0.179133	0.00832753	0.0285349	944.962	0.358665	0.359325	0.280671	0.452457
ENSMUSG00000044055	Otos	3.34566	0.0683011	0.297867	0.0919589							2.68933	0.121281	0.518749	0.21764
ENSMUSG00000100546	Gm29483	242.608	-0.368435	0.21194	0.0250983	0.112341	263.329	-0.0159378	0.125738	0.825845	0.936327	276.409	-0.373444	0.198466	0.0398143	0.104763	157.167	2.01708	0.432227	5.00155e-07	1.21605e-05
ENSMUSG00000034220	Gpc1	215.579	-0.101362	0.179837	0.473587	0.73202	223.924	0.03699	0.130498	0.614846	0.83677	266.837	0.114514	0.189224	0.514457	0.691273	7.57556	0.0134127	0.768197	0.97893	0.988339
ENSMUSG00000034212	Ankmy1	16.5296	0.0281816	0.271524	0.770427	0.905299	14.8005	0.00200944	0.151198	0.945234		17.1284	0.00160139	0.417259	0.997247	0.998579	2.64031	0.423742	1.0684	0.07925
ENSMUSG00000047067	Dusp28	7.21635	-0.0477788	0.285432	0.480848		8.54308	-0.00118068	0.152577	0.948301		10.529	0.0111507	0.445373	0.962493	0.980989	21.7039	-0.976498	1.08385	0.087114	0.202106
ENSMUSG00000097251	5033417F24Rik	2.99077	0.0524995	0.292597	0.211524
ENSMUSG00000026269	Rnpepl1	97.2751	-0.249737	0.268423	0.137891	0.361651	97.9621	-0.0508288	0.148028	0.415504	0.713816	109.887	-0.329543	0.273914	0.154888	0.301337	24.846	-0.448438	0.620844	0.342522	0.516712
ENSMUSG00000026270	Capn10	328.817	0.103892	0.158981	0.435927	0.702885	349.115	0.266437	0.213208	0.025426	0.142064	365.708	0.112791	0.163872	0.467311	0.652184	114.16	-0.168295	0.395329	0.636257	0.767088
ENSMUSG00000026271	Gpr35	944.494	-0.136245	0.115267	0.19547	0.446789	939.419	-0.0071898	0.096543	0.922793	0.971377	1024.44	-0.239134	0.138122	0.070888	0.165927	178.347	1.49643	0.564418	0.00196861	0.0116368
ENSMUSG00000014602	Kif1a	27.1885	0.312798	0.461871	0.0518296	0.188821	24.8785	0.0631942	0.168493	0.0894319		28.2523	0.525523	0.529345	0.09388	0.206079	6.91376	0.267672	0.899324	0.466643	0.633347
ENSMUSG00000084989	E030010N08Rik	6.95835	-0.00262486	0.279803	0.966198		5.21934	-0.00797228	0.153415	0.586965		5.55307	-0.153368	0.505746	0.367354
ENSMUSG00000047793	Sned1	81.1928	-0.140187	0.252059	0.344937	0.622425	72.6263	-0.0894883	0.175215	0.14233	0.41389	96.3418	-0.118176	0.278941	0.611096	0.76519	19.3972	1.59255	0.933983	0.0152032	0.0565567
ENSMUSG00000026273	Mterf4	262.433	0.0312215	0.172295	0.822722	0.930404	245.844	0.00400897	0.126808	0.946151	0.981025	286.143	-0.0198542	0.187023	0.907599	0.953049	70.9686	-0.60581	0.449107	0.1233	0.257609
ENSMUSG00000101172	Gm28535	10.3122	-0.0545008	0.285815	0.451866	0.716066	10.2959	-0.014302	0.153096	0.525015		15.7457	0.0461324	0.429528	0.842745	0.916503
ENSMUSG00000100351	Gm7867	10.8148	-0.0536556	0.281794	0.516413	0.763822	8.24476	-0.0272934	0.156149	0.172008		18.1229	0.203596	0.448519	0.418711	0.607964
ENSMUSG00000026274	Pask	286.473	-0.000506318	0.166248	0.995601	0.99832	276.757	0.0197022	0.122697	0.793213	0.924738	360.876	0.293708	0.177669	0.0769209	0.176588	64.7025	-0.243121	0.444812	0.532935	0.687227
ENSMUSG00000026275	Ppp1r7	1470.89	0.0962035	0.10161	0.311334	0.589136	1384.58	0.0648127	0.0925577	0.386715	0.690269	1707.22	0.206091	0.0978328	0.0317629	0.0868675	395.005	0.11061	0.36911	0.74711	0.845483
ENSMUSG00000034107	Ano7	16.0768	-0.0103437	0.270954	0.90841	0.967585	17.8329	0.0130482	0.151852	0.649933		17.1736	-0.0700697	0.430131	0.758575	0.866618	8.01832	0.341955	0.871577	0.4277	0.597974
ENSMUSG00000034088	Hdlbp	20409.1	-0.143792	0.0796262	0.061399	0.211864	20092.9	-0.0280712	0.065765	0.627768	0.843701	22015.5	-0.257414	0.0746777	0.000483739	0.00238038	1638.29	0.757234	0.30075	0.00775525	0.0338311
ENSMUSG00000090489	Gm17415	3.19276	0.0454378	0.289876	0.327069							3.97645	0.182478	0.528472	0.234387
ENSMUSG00000026276	Sept2	69.431	-0.411881	0.39947	0.0439226	0.168567	68.8939	-0.090139	0.178312	0.119958	0.374182	76.4307	-0.675723	0.369271	0.0192583	0.057484	26.1912	-0.707768	0.698413	0.164346	0.313303
ENSMUSG00000034066	Farp2	653.878	-0.101148	0.127262	0.374809	0.64933	599.157	-0.13249	0.128221	0.132428	0.397681	721.944	-0.150174	0.128852	0.227316	0.398859	56.9878	-0.903906	0.496019	0.033681	0.10178
ENSMUSG00000103854	RP23-302H1.1	16.6427	-0.0926721	0.288102	0.351544	0.627611	16.5193	-0.0178356	0.15267	0.52228		19.0494	-0.214685	0.446046	0.396695	0.587424	13.3408	-1.95208	1.4016	0.0132179	0.050809
ENSMUSG00000026277	Stk25	1639.09	-0.180657	0.101049	0.0552425	0.197412	1636.24	-0.0266359	0.0860368	0.708155	0.887306	1763.67	-0.310142	0.0969271	0.00108233	0.00483866	811.522	0.572361	0.253043	0.0186501	0.0659418
ENSMUSG00000100927	Gm28536	6.81066	0.0285089	0.282243	0.669166		4.94785	-0.00246494	0.15294	0.879299		4.7089	-0.111474	0.494606	0.481318
ENSMUSG00000026278	Bok	17.2229	0.050607	0.274991	0.60295	0.818916	10.105	-0.026621	0.155594	0.234871		23.1765	0.351933	0.493045	0.204958	0.37063	40.2052	0.174616	0.591049	0.706901	0.817219
ENSMUSG00000026279	Thap4	271.684	0.018008	0.163836	0.895148	0.961255	278.774	0.105384	0.147201	0.21305	0.511264	324.004	0.187257	0.180086	0.266203	0.446477	160.418	-0.976311	0.383943	0.00527786	0.0252056
ENSMUSG00000101952	Gm10550	2.68587	0.000792959	0.285114	0.98728		3.6105	0.00634504	0.153472	0.627914		4.34511	0.0865882	0.492312	0.564899		4.27251	-0.0326421	0.772849	0.93814	0.965509
ENSMUSG00000026280	Atg4b	543.969	0.0198085	0.138675	0.87195	0.951565	528.517	0.0486428	0.113915	0.537383	0.795251	636.202	0.139324	0.135305	0.28565	0.469568	485.28	-1.72659	0.394158	2.48875e-06	4.87248e-05
ENSMUSG00000026281	Dtymk	128.429	0.254099	0.243463	0.127346	0.34263	125.484	0.127355	0.196255	0.100178	0.336736	186.921	0.952301	0.243877	1.95484e-05	0.000132424	478.889	-1.44867	0.572875	0.00279234	0.0153644
ENSMUSG00000026283	Ing5	727.698	0.126611	0.125646	0.260497	0.532196	676.049	0.05688	0.107281	0.47068	0.751967	816.753	0.152229	0.124408	0.206609	0.372839	107.181	-0.329675	0.418093	0.376197	0.54812
ENSMUSG00000073609	D2hgdh	38.2452	0.822363	0.640997	0.00910915	0.0530358	21.35	0.00448454	0.150044	0.895676		36.165	0.604576	0.497759	0.061259	0.147795	16.8052	-0.207884	0.669581	0.657806	0.783077
ENSMUSG00000094651	Gal3st2	420.758	-0.674515	0.172507	1.26277e-05	0.000239484	436.836	-0.276724	0.177165	0.0162791	0.1051	484.21	-0.592063	0.156708	6.97362e-05	0.000421929	87.9417	-2.39271	0.485899	1.13534e-07	3.35346e-06
ENSMUSG00000101660	Gm18666	4.818	0.0335229	0.284908	0.567307							5.00812	0.0702659	0.481608	0.670827
ENSMUSG00000093805	Gm9994	22.5507	0.117526	0.292044	0.303084	0.580499	9.92423	-0.0372311	0.159491	0.05462		29.4637	0.564087	0.533628	0.0796875	0.181788	3.87668	-0.48745	1.00356	0.2129	0.375562
ENSMUSG00000099624	Gm7889	10.6089	0.0667776	0.288818	0.371664	0.646365	12.4186	0.0287215	0.156274	0.187525		9.44726	0.0693896	0.465859	0.720968	0.841664
ENSMUSG00000073608	Gm6086	274.046	0.507513	0.213621	0.00341521	0.0243597	206.333	0.00695063	0.129772	0.923687	0.971667	346.34	0.84327	0.19198	2.97911e-06	2.37453e-05	23.6962	1.17111	0.841947	0.0457265	0.127187
ENSMUSG00000026285	Pdcd1	9.57564	-0.178852	0.363844	0.0293243	0.125626	10.1943	-0.036328	0.158553	0.113372		11.4506	-0.567007	0.803522	0.0558462	0.137222	6.80344	2.52055	2.25885	0.0125049	0.04875
ENSMUSG00000100347	Gm7895	62.7171	0.12783	0.259788	0.386538	0.659728	54.241	0.0118405	0.146164	0.803546	0.92834	67.5758	0.166941	0.32525	0.508917	0.686573	4.35867	-0.205316	0.814205	0.630166	0.762998
ENSMUSG00000099592	Gm5264	9.12309	-0.0119494	0.277194	0.874005	0.952176	10.3624	0.00742494	0.152451	0.739513		11.6917	0.0624988	0.44427	0.777876	0.877967
ENSMUSG00000051185	Fam174a	57.8344	0.0368681	0.236837	0.790171	0.915498	48.5202	-0.0251536	0.14869	0.585698		68.4163	0.170204	0.311708	0.492722	0.672879	21.7882	0.444348	0.73385	0.370638	0.542877
ENSMUSG00000081051	Gm15427	19.8693	-0.00843	0.269729	0.926901	0.974914	22.4333	0.0186828	0.152032	0.558457		21.525	-0.0476495	0.415012	0.84027	0.91491	30.2277	-0.356971	0.531723	0.413498	0.584625
ENSMUSG00000100589	4930533P14Rik	2.31451	-0.014424	0.28658	0.686156		2.5257	-0.00207031	0.153492	0.838031
ENSMUSG00000040693	Slco4c1	270.391	0.15454	0.172263	0.27014	0.545097	258.556	0.0946264	0.146258	0.247658	0.555636	394.533	0.828574	0.169269	2.73614e-07	2.64089e-06	237.521	-1.73642	0.416744	6.3661e-06	0.000107231
ENSMUSG00000097814	Panct2	35.3023	0.008136	0.253526	0.948584	0.98203	28.0315	-0.0313122	0.153393	0.405689		50.2175	0.427205	0.394359	0.133116	0.269943	43.1429	-2.36548	0.59527	8.81418e-06	0.000140374
ENSMUSG00000044757	Gm6430	8.09938	-0.00299909	0.279067	0.962802		8.99964	0.00762456	0.152592	0.721689		7.93846	-0.0746439	0.469426	0.689666	0.820393
ENSMUSG00000044768	D1Ertd622e	4579.67	-0.311446	0.0826846	8.1833e-05	0.00115888	4617.86	-0.104414	0.0780621	0.121154	0.376625	5210.53	-0.264551	0.0763769	0.000459335	0.00227367	983.915	0.588945	0.294358	0.0348943	0.104487
ENSMUSG00000040648	Ppip5k2	16066.6	-0.230443	0.0767593	0.0017771	0.0145929	15913.2	-0.0891863	0.0683581	0.155999	0.433932	16801.1	-0.457324	0.0696524	4.28964e-11	7.06653e-10	1356.2	0.694243	0.328482	0.0233088	0.0780731
ENSMUSG00000026333	Gin1	38.4425	0.357592	0.470262	0.0506136	0.185714	27.8084	0.0252257	0.15194	0.499913		42.8418	0.690378	0.47997	0.0360244	0.0965521	52.5022	-0.462967	0.535581	0.292561	0.464782
ENSMUSG00000026335	Pam	26.4531	0.00597898	0.26194	0.959153	0.985647	19.7881	-0.0334753	0.155672	0.294179		25.4821	-0.183906	0.41537	0.473682	0.657404	11.29	0.234094	0.682923	0.625321	0.759675
ENSMUSG00000089782	Gm3531	50.0552	-0.0593734	0.245489	0.657311	0.848655	47.4699	-0.0179247	0.147294	0.697439		49.0401	-0.402598	0.389203	0.149433	0.293752	8.82133	0.0480806	0.70198	0.920757	0.955827
ENSMUSG00000089791	Gm3555	8.78387	0.0023668	0.277254	0.97783	0.991763	8.8703	0.00382425	0.152396	0.859109		10.5937	0.0574652	0.449047	0.789762	0.885514
ENSMUSG00000082431	Tdpx-ps1	12.6846	0.105026	0.30036	0.236834	0.503668	9.68334	0.0134205	0.152956	0.559177		10.6939	0.0969332	0.460521	0.646593	0.790429	7.4321	0.39194	0.753006	0.419317	0.59036
ENSMUSG00000100955	Gm18728	3.43122	-0.0224711	0.285291	0.639924		2.81913	-0.00895071	0.153726	0.462817		3.079	-0.117625	0.509228	0.359335		1.83877	0.347768	0.956779	0.312411
ENSMUSG00000050840	Cdh20	51.3725	-0.210468	0.309866	0.169941	0.412513	52.5257	-0.0342666	0.151072	0.46149		49.0334	-0.973238	0.480675	0.00635472	0.0226839	10.9716	1.24034	1.03072	0.0496394	0.13473
ENSMUSG00000047496	Rnf152	74.8306	-0.350423	0.336915	0.0642894	0.219007	75.2419	-0.0706219	0.162108	0.228673	0.532508	101.833	-0.0199454	0.271035	0.928629	0.964052	20.8541	0.368403	0.636834	0.444006	0.612753
ENSMUSG00000101214	Gm28403	4.73239	-0.0368968	0.287609	0.450439		3.9867	-0.0132233	0.154223	0.273813		9.49224	0.0995122	0.47126	0.613842	0.767431	3.94638	0.336705	0.892539	0.406386	0.577678
ENSMUSG00000067017	Gm3608	45.9077	-0.037078	0.245129	0.776511	0.908232	45.495	0.000501704	0.146075	0.995963		43.0488	-0.442939	0.415584	0.125101	0.256973	8.53509	0.665356	0.879555	0.203115	0.363376
ENSMUSG00000056536	Pign	657.322	-0.0016491	0.124999	0.987271	0.995096	635.162	0.0326363	0.10546	0.675104	0.868446	757.517	0.08206	0.124029	0.495668	0.675248	351.92	0.216109	0.286452	0.42929	0.599301
ENSMUSG00000100672	Gm28404	3.82862	-0.0263026	0.285261	0.606125		3.13125	-0.00932678	0.153799	0.426551		5.05345	-0.0288907	0.476798	0.855326
ENSMUSG00000101219	Gm20302	7.59465	0.00267864	0.278684	0.972718		8.54419	0.00912518	0.152744	0.666644		7.29632	-0.0785649	0.468832	0.677604	0.812221
ENSMUSG00000101656	Gm8004	4.03836	-0.0257744	0.285141	0.618607		5.5786	0.0043256	0.152947	0.803		6.39879	0.0376339	0.469854	0.836102	0.91266
ENSMUSG00000026319	2310035C23Rik	1989.98	-0.465639	0.100576	9.87179e-07	2.59224e-05	2244.59	0.040633	0.0859178	0.570252	0.813753	2139.54	-0.614299	0.0921626	1.16364e-11	2.04885e-10	483.231	0.302224	0.288726	0.271996	0.442873
ENSMUSG00000104044	RP24-283P23.1	13.164	0.0718876	0.285785	0.414885	0.684772	8.89213	-0.00279152	0.152343	0.893327		14.0461	0.164566	0.464184	0.475586	0.658953	2.6221	0.21762	0.913471	0.487017
ENSMUSG00000101330	Gm10193	7.98771	0.0888428	0.298286	0.226612		5.47504	0.00835593	0.153115	0.640463		10.9479	0.480798	0.703663	0.0788969	0.180268
ENSMUSG00000026321	Tnfrsf11a	5.60235	0.0517821	0.288519	0.392341		3.96281	0.00453649	0.153144	0.769633		4.52464	0.0413838	0.478572	0.800231		5.56113	0.440929	0.871472	0.337367	0.51183
ENSMUSG00000099843	Gm7160	4.84278	-0.0405832	0.286669	0.470358		6.27554	0.000683974	0.152802	0.971423		7.775	0.0258047	0.466173	0.890014	0.943192	10.6234	0.888718	1.05681	0.108015	0.235159
ENSMUSG00000038866	Zcchc2	2902.53	-0.119497	0.088788	0.155789	0.390133	2771.79	-0.0738098	0.0907874	0.316606	0.62807	3190.74	-0.176611	0.0878074	0.0408078	0.106885	219.984	0.0256404	0.319982	0.934292	0.963033
ENSMUSG00000102501	RP24-339K18.3	6.10755	0.00752798	0.280829	0.908877		4.21578	-0.00861576	0.15341	0.572846		3.47508	-0.235005	0.574192	0.0622905
ENSMUSG00000097612	Gm26509	5.35401	-0.0485566	0.288518	0.384815		7.62975	0.00436503	0.152498	0.834939		6.28079	-0.138047	0.490659	0.453449	0.640068
ENSMUSG00000044340	Phlpp1	50.419	0.0552535	0.245726	0.680924	0.860587	40.713	-0.0219393	0.150277	0.582535		52.6996	-0.0110272	0.325363	0.962576	0.981028	6.85661	0.57113	0.830494	0.261376	0.431251
ENSMUSG00000057329	Bcl2	27.7596	0.126377	0.295158	0.277806	0.552714	21.532	0.00782832	0.150658	0.807115		39.5497	0.823161	0.558445	0.0227896	0.0660394	4.58298	-4.8021	3.35967	0.00286913	0.0157268
ENSMUSG00000009905	Kdsr	201.589	0.256527	0.216899	0.109587	0.311246	173.699	0.0327291	0.136734	0.62972	0.844211	229.984	0.376628	0.207735	0.0463718	0.118312	88.3717	0.154655	0.367327	0.648807	0.776664
ENSMUSG00000009907	Vps4b	886.939	-0.115816	0.127565	0.310138	0.588003	831.09	-0.108071	0.109996	0.187668	0.479721	986.419	-0.145641	0.121564	0.216019	0.38446	232.015	0.00183768	0.298612	0.997042	0.998109
ENSMUSG00000067006	Serpinb5	9.77532	0.039972	0.281901	0.592283	0.810903	8.89216	0.00787473	0.152778	0.698606		9.49561	0.0394601	0.451594	0.85164	0.922027	10.1103	2.20747	1.52749	0.0111817	0.0449405
ENSMUSG00000059956	Serpinb12	162.306	-0.175679	0.217144	0.2546	0.525491	161.394	-0.0373322	0.137578	0.568433	0.813194	157.011	-0.726888	0.26503	0.00180405	0.00759517	32.6224	1.55762	0.745876	0.00750265	0.0330144
ENSMUSG00000044594	Serpinb3a	291.006	0.0245176	0.163147	0.856747	0.945635	265.487	-0.0213896	0.129762	0.761329	0.910565	294.653	-0.227209	0.18502	0.185763	0.344278	131.167	2.02742	0.579201	7.00981e-05	0.000793356
ENSMUSG00000067001	Serpinb7	8.38248	0.132351	0.326606	0.0559451		3.90862	0.0074547	0.153563	0.564545		5.22804	0.142018	0.50549	0.381002
ENSMUSG00000062345	Serpinb2	3.70003	-0.0143312	0.283984	0.779166		4.29927	0.00176501	0.153008	0.913916		4.14457	-0.0482064	0.482498	0.752368		23.1688	5.63588	1.1818	5.81623e-07	1.38884e-05
ENSMUSG00000026315	Serpinb8	48.869	-0.0735031	0.251991	0.578892	0.803268	47.6782	-0.0146084	0.147399	0.741784		51.8701	-0.250943	0.368594	0.341051	0.530901	7.7985	0.949001	1.23298	0.0864846	0.201095
ENSMUSG00000086161	Gm15389	8.63531	-0.104682	0.306749	0.15119		7.03021	-0.0344807	0.158895	0.0351479		8.66922	-0.722987	1.17782	0.0254032	0.0720856	30.1614	3.32875	1.17771	0.000296848	0.00256359
ENSMUSG00000100457	D830032E09Rik	7.39627	0.00716368	0.280812	0.91316		6.28746	-0.00186126	0.152642	0.919104		5.80535	-0.144645	0.49607	0.418239		1.63659	0.278229	0.988199	0.197852
ENSMUSG00000100041	Gm5702	15.0759	0.00601976	0.273593	0.947592	0.98175	13.0115	-0.00455925	0.15224	0.835659		15.0291	-0.0723018	0.443335	0.741449	0.856094
ENSMUSG00000026312	Cdh7	4.45709	-0.0182321	0.283279	0.744015		7.2346	0.0167089	0.153873	0.401259		5.77468	0.00140475	0.469208	0.996427
ENSMUSG00000047216	Cdh19	70.4338	-0.0162726	0.226954	0.905655	0.966564	63.1767	-0.0272111	0.146337	0.603573	0.832983	80.0222	0.00377302	0.285464	0.989047	0.994168	31.9731	0.595886	0.696341	0.237941	0.405245
ENSMUSG00000038702	Dsel	390.715	-0.0280886	0.1472	0.822986	0.930493	330.191	-0.218407	0.193645	0.0432009	0.201576	436.997	-0.0320378	0.154355	0.826158	0.906659	124.535	2.27383	0.375857	2.11819e-10	1.2454e-08
ENSMUSG00000070695	Cntnap5a	53.5746	-0.00920353	0.240682	0.94243	0.98016	58.2458	0.0455884	0.152659	0.383594	0.686905	61.6663	0.0364965	0.313855	0.884192	0.940322	3.14159	0.158178	0.873218	0.651994	0.778736
ENSMUSG00000094429	Gm19965	56.0154	-0.284209	0.340135	0.100599	0.294444	69.2705	0.0214511	0.14536	0.682681	0.872345	68.3612	-0.251027	0.319026	0.317298	0.506768	3.92713	0.196155	0.862074	0.609809	0.748425
ENSMUSG00000107979		367.402	-0.0862537	0.165682	0.52606	0.770615	391.359	0.0967376	0.138709	0.248056	0.55584	318.506	-0.984456	0.193294	6.83659e-08	7.25887e-07	6.46464	0.513723	0.97598	0.239738	0.407601
ENSMUSG00000101373	Zfp813-ps	3347.03	-0.428764	0.0990607	4.6637e-06	0.000102654	3553.78	-0.064947	0.0803541	0.343179	0.651441	2936.77	-1.4663	0.0860582	5.15056e-66	1.93101e-63	32.377	-0.0931695	0.512432	0.826048	0.898036
ENSMUSG00000099615	Gm28362	99.1725	-0.122469	0.22741	0.41431	0.684742	106.451	0.0225095	0.13972	0.71628	0.890521	83.3467	-1.25298	0.356728	5.3983e-05	0.000334719	17.1201	0.950676	0.791079	0.085184	0.198862
ENSMUSG00000100265	Gm28363	219.892	-0.434052	0.226432	0.0129391	0.0688271	230.269	-0.0746853	0.141979	0.33393	0.643262	208.87	-1.15528	0.254664	8.20911e-07	7.23287e-06
ENSMUSG00000100527	Gm28359	9.74463	-0.0366702	0.279466	0.640013	0.83961	13.4921	0.0200878	0.153261	0.461296		13.4251	0.039484	0.44204	0.858151	0.925851
ENSMUSG00000101303	B020011L13Rik	1091.87	-0.364394	0.117225	0.000715354	0.0069493	1150.09	-0.0402101	0.0935238	0.589134	0.8249	1174.81	-0.511697	0.113713	3.67398e-06	2.87998e-05	232.089	1.87922	0.406691	7.57655e-07	1.72125e-05
ENSMUSG00000100305	Gm28360	19.9526	-0.0513453	0.271587	0.618259	0.826867	17.224	-0.0276444	0.154295	0.363111		21.1256	-0.209234	0.442827	0.406612	0.596611	5.50914	0.0416712	0.830698	0.918073	0.95495
ENSMUSG00000099534	Gm28169	5.50906	-0.0132442	0.282151	0.82058		6.01196	0.00184053	0.152797	0.919596		7.23661	0.0331871	0.466131	0.859371	0.926774
ENSMUSG00000100886	Gm7195	71.421	-0.0243511	0.227167	0.860524	0.947565	70.4264	0.00743786	0.142555	0.892405	0.962082	64.4267	-0.585999	0.373158	0.0404216	0.106091	6.33669	0.279926	0.871708	0.490986	0.652868
ENSMUSG00000101415	Gm28168	113.515	-0.134388	0.226419	0.374187	0.648916	122.715	0.0285242	0.138917	0.658324	0.85963	124.133	-0.262615	0.263707	0.24322	0.418699	4.32218	0.236439	0.902042	0.494777	0.655696
ENSMUSG00000100617	Gm7145	2008.16	-0.371099	0.122635	0.000912092	0.00849975	2122.71	-0.0420847	0.0826872	0.544167	0.799844	1840.72	-1.17527	0.101339	6.41078e-32	6.27939e-30	55.4757	0.971068	0.574334	0.0402067	0.115875
ENSMUSG00000100703	Gm28358	17.7701	-0.0961275	0.288067	0.349372	0.625672	15.2149	-0.0393176	0.158527	0.17005		21.344	-0.171398	0.424867	0.494447	0.674288
ENSMUSG00000100177	Gm29489	8.86771	-0.0257446	0.278932	0.730255	0.886363	7.22763	-0.0151732	0.153609	0.44791		7.6828	-0.246585	0.533283	0.233599	0.406971
ENSMUSG00000101590	Gm29104	2.54863	0.00506635	0.284875	0.9104		4.41729	0.0154815	0.154251	0.311654		4.3597	0.126272	0.500374	0.428038
ENSMUSG00000102030	Gm29106	3437.23	-0.224669	0.0852844	0.00563243	0.0363403	3543.94	0.0123461	0.0801532	0.858014	0.948426	3452.33	-0.590525	0.0844744	1.26528e-12	2.49218e-11	100.693	0.429854	0.410082	0.244124	0.41214
ENSMUSG00000026374	Tsn	129.707	0.0738504	0.205063	0.615085	0.825174	136.051	0.116876	0.178911	0.139079	0.409561	130.726	-0.12472	0.243467	0.557579	0.724849	291.63	-0.268294	0.506327	0.52657	0.682421
ENSMUSG00000026377	Nifk	1158.06	-0.132871	0.112765	0.198899	0.451948	1186.98	0.0466508	0.102172	0.54875	0.803491	1481.7	0.219763	0.109365	0.0394457	0.103969	1379.99	-1.13124	0.335636	0.00030901	0.00265391
ENSMUSG00000099936	Gm28867	32.8256	0.150673	0.295346	0.255881	0.527095	26.2392	0.0109495	0.149675	0.767338		55.7334	1.27928	0.451112	0.00051387	0.00250766	60.1299	-4.4372	0.823846	6.56743e-09	2.60703e-07
ENSMUSG00000064302	Clasp1	2507.34	-0.227318	0.0907889	0.00809564	0.0483246	2452.7	-0.110042	0.086072	0.126917	0.387541	2633.61	-0.438512	0.0893103	5.78502e-07	5.24803e-06	261.885	0.211698	0.352108	0.518653	0.675672
ENSMUSG00000107722		4.96136	0.0918178	0.305126	0.098125		4.69915	0.0235614	0.155888	0.110377							3.21875	-0.247688	0.890516	0.49406	0.654998
ENSMUSG00000026380	Tfcp2l1	388.527	0.546791	0.172557	0.000291324	0.00330722	326.294	0.166334	0.166229	0.0860987	0.307729	444.418	0.633989	0.159034	2.75728e-05	0.000180975	93.9177	-0.270684	0.407857	0.458013	0.6253
ENSMUSG00000048402	Gli2	92.2112	-0.0612419	0.22147	0.669977	0.855352	84.8149	-0.0342534	0.14632	0.540401	0.797383	101.787	-0.119453	0.268549	0.598787	0.756245	15.3559	-0.331112	0.740824	0.487717	0.650184
ENSMUSG00000004451	Ralb	22.7433	0.238872	0.394754	0.0673501	0.226452	15.1439	0.01751	0.15252	0.541912		27.6104	0.93504	0.65581	0.0189396	0.0567241	13.5725	0.410116	0.627293	0.390352	0.562715
ENSMUSG00000098923	Tmem185b	27.7806	0.19234	0.331416	0.14889	0.379821	26.3012	0.0524904	0.16203	0.165215		40.3469	1.08244	0.542993	0.0055909	0.0203778	246.483	-2.27089	0.432954	2.04886e-08	7.32456e-07
ENSMUSG00000101731	3830432H09Rik	5.2046	0.00772513	0.282047	0.897585		4.55026	-0.000257046	0.152999	0.984252		6.69328	0.0859291	0.477022	0.635882	0.783671
ENSMUSG00000026383	Epb4.1l5	1928.88	-0.215644	0.0960437	0.0168033	0.083621	1921.09	-0.0544909	0.0901744	0.458271	0.744851	2237.21	-0.117061	0.0921148	0.193314	0.354585	446.982	0.697022	0.302652	0.0147693	0.0553281
ENSMUSG00000026384	Ptpn4	513.46	0.291988	0.15873	0.031171	0.131112	451.609	0.079063	0.121783	0.334165	0.643262	725.514	0.883698	0.141309	1.04243e-10	1.63547e-09	129.234	-0.0987757	0.384337	0.775998	0.865734
ENSMUSG00000091876	Gm3851	11.6516	0.130228	0.318081	0.124683	0.337648	9.20088	0.0231387	0.154823	0.293637		12.303	0.392286	0.598707	0.132745	0.269316
ENSMUSG00000103146	RP23-274C16.4	23.8041	0.0214095	0.264361	0.844597	0.940127	18.126	-0.023508	0.153179	0.444581		30.3676	0.216321	0.407569	0.414835	0.604608	6.0145	-0.0561854	0.814421	0.886569	0.937021
ENSMUSG00000101224	Gm28209	4.12659	0.0278959	0.285269	0.596351							3.03367	-0.0191781	0.485653	0.8879
ENSMUSG00000036975	Tmem177	61.3961	0.602844	0.459803	0.0160603	0.080917	55.2844	0.121261	0.212497	0.0474618	0.214323	74.2494	0.955105	0.382037	0.00221519	0.00908685	101.715	-1.09584	0.582415	0.0217037	0.0741717
ENSMUSG00000036962	Cfap221	57.3315	-0.0616708	0.241009	0.652308	0.846909	65.7689	0.0484687	0.152979	0.369107	0.673361	65.7901	-0.0576926	0.30643	0.811937	0.898	49.7841	0.365933	0.485493	0.379857	0.551841
ENSMUSG00000092245	Gm17973	35.918	0.0508567	0.256944	0.68285	0.861387	41.163	0.060789	0.163772	0.180614		34.9796	-0.0747456	0.379977	0.766282	0.871508	12.7516	0.487137	0.726304	0.330935	0.505008
ENSMUSG00000050777	Tmem37	16.5006	-0.107291	0.295718	0.278776	0.553835	15.7295	-0.0249359	0.154383	0.351159		21.6886	-0.093506	0.412604	0.699564	0.826516	204.718	-0.137161	0.563871	0.757157	0.85325
ENSMUSG00000026385	Dbi	839.985	-0.190653	0.127892	0.0943345	0.282053	822.75	-0.0732924	0.10757	0.357696	0.663684	844.345	-0.562876	0.12685	4.35357e-06	3.37138e-05	1143.58	0.830139	0.359432	0.0123203	0.0483123
ENSMUSG00000026388	3110009E18Rik	223.38	-0.560423	0.229913	0.00238858	0.0184169	222.82	-0.211063	0.241471	0.0473786	0.214323	214.125	-1.2883	0.231188	3.26985e-09	4.18007e-08	111.864	0.979961	0.414078	0.0086141	0.0366624
ENSMUSG00000026389	Steap3	8.3173	0.0556522	0.288738	0.387664		3.92801	-0.000897534	0.153728	0.859363		21.472	0.141061	0.525811	0.186081	0.344662	2.29948	-0.397332	1.05339	0.0854199
ENSMUSG00000026390	Marco	7.51343	0.00416365	0.278859	0.955848		8.50941	0.0106372	0.1528	0.626679		8.31994	0.00394978	0.455794	0.986807	0.993064
ENSMUSG00000058665	En1	16.269	0.0980666	0.291515	0.322199	0.600167	14.7567	0.0223246	0.153582	0.424948		17.9289	0.2543	0.471509	0.32158	0.511204
ENSMUSG00000003721	Insig2	41.9597	-0.077489	0.25745	0.549128	0.785459	44.313	0.00438391	0.146558	0.924026		44.7065	-0.243047	0.370875	0.357331	0.548082	31.8335	0.576656	0.676685	0.244366	0.412355
ENSMUSG00000104253	RP24-98O21.4	5.6815	0.0634907	0.292013	0.290385		7.06285	0.0299327	0.157077	0.112556		4.1543	0.045012	0.483294	0.767264		2.62762	0.355465	0.985442	0.242694
ENSMUSG00000026339	Ccdc93	396.151	-0.00784139	0.146964	0.949287	0.982303	398.462	0.0740791	0.125873	0.359669	0.665217	428.146	-0.102656	0.156338	0.488431	0.669089	88.376	0.0687541	0.463216	0.86656	0.923729
ENSMUSG00000085857	Gm15392	10.2559	-0.0423779	0.281473	0.576326	0.801724	11.5111	0.000389621	0.151738	0.988656		9.17694	-0.324628	0.575537	0.156905	0.304299	12.719	1.31716	1.02131	0.0383113	0.111975
ENSMUSG00000050534	Htr5b	22.52	0.0381132	0.266167	0.726098	0.883523	20.0589	0.00322649	0.150255	0.923058		35.7056	0.670702	0.518415	0.045147	0.115837	35.2722	-0.450636	0.585941	0.32904	0.503153
ENSMUSG00000001674	Ddx18	1176.44	-0.1665	0.110367	0.101321	0.295622	1294.3	0.183135	0.110088	0.0330722	0.169393	1401.37	-0.00119974	0.114818	0.989344	0.994329	582.784	-1.86083	0.33454	5.05656e-09	2.06425e-07
ENSMUSG00000102006	Gm28591	2.72325	-0.0541378	0.293724	0.136186		3.37674	-0.00760535	0.153591	0.541978		2.88163	-0.207066	0.558051	0.0853857
ENSMUSG00000102488	RP23-265D3.2	3.81124	-0.0278501	0.285884	0.570853		2.88167	-0.011869	0.154148	0.276025		3.54634	-0.15545	0.521717	0.245866
ENSMUSG00000100405	Gm28911	22.3381	0.0159634	0.265992	0.879922	0.955229	23.9064	0.0240057	0.152318	0.4915		26.4884	0.113164	0.414529	0.649878	0.792663
ENSMUSG00000036815	Dpp10	782.942	-0.536087	0.132965	1.14357e-05	0.000219012	780.775	-0.31446	0.142709	0.00374374	0.0371895	839.298	-0.709193	0.126686	7.56668e-09	9.18691e-08	230.208	0.827937	0.370092	0.0147039	0.0551048
ENSMUSG00000102801	RP23-247F18.3	5.02171	-0.00416615	0.282062	0.940488		6.64263	0.0113118	0.153332	0.542537		7.21864	0.0860871	0.474397	0.64439	0.789262	3.47332	-0.124747	0.855445	0.730796	0.83454
ENSMUSG00000026341	Actr3	9817.62	-0.150864	0.0799271	0.048557	0.180585	9590.11	-0.0544423	0.0676084	0.368833	0.673069	10528	-0.284575	0.0726421	7.14039e-05	0.000430482	1441.21	0.633535	0.260281	0.011136	0.0448246
ENSMUSG00000026342	Slc35f5	43.0874	0.0936676	0.264426	0.47339	0.731902	35.1735	-0.00309884	0.148446	0.934608		51.3945	0.305323	0.376573	0.261702	0.44138	29.4499	0.404702	0.55792	0.370825	0.543065
ENSMUSG00000026344	Lypd1	59.5139	-0.0210829	0.278555	0.774286	0.906938	48.4067	-0.0534372	0.162187	0.166269		39.4045	-3.38014	0.747058	3.76288e-07	3.52993e-06
ENSMUSG00000049690	Nckap5	1533.52	-0.321424	0.128504	0.00541316	0.0353217	1528.98	-0.133305	0.110488	0.110455	0.356362	1604	-0.570522	0.114924	3.2383e-07	3.07363e-06	79.0525	0.391683	0.52099	0.370443	0.542719
ENSMUSG00000036155	Mgat5	341.052	-0.164813	0.161725	0.221276	0.484318	323.275	-0.0951679	0.138319	0.252741	0.562286	364.368	-0.332051	0.168851	0.0359791	0.0964574	33.3405	0.00687679	0.515275	0.990025	0.994172
ENSMUSG00000104378	RP23-323H18.2	3.6931	-0.0502996	0.290438	0.312511		4.48955	-0.00583755	0.153153	0.710458		5.03082	-0.0849062	0.483496	0.61097
ENSMUSG00000099471	Gm8451	14.9727	0.0275993	0.273775	0.761063	0.899517	17.9757	0.0334011	0.15612	0.2661		16.1517	0.0568296	0.425581	0.810256	0.897281	2.43311	0.112905	0.866865	0.746895
ENSMUSG00000026347	Tmem163	12.1369	0.0267223	0.275513	0.757484	0.897953	11.6063	0.00823021	0.152177	0.736925		10.0907	-0.133948	0.46645	0.530965	0.704745	3.03979	0.296491	0.938419	0.365965	0.538545
ENSMUSG00000026348	Acmsd	5.77353	0.086806	0.300897	0.161754		6.08388	0.026652	0.156352	0.124969		6.99398	0.344877	0.619555	0.105422	0.22565	2.78603	-0.272995	0.937492	0.375967	0.547935
ENSMUSG00000026349	Ccnt2	4063.45	-0.388036	0.094808	1.53736e-05	0.000283545	3854.44	-0.366591	0.0952998	1.57542e-05	0.00052134	4447.51	-0.470702	0.0839153	1.27047e-08	1.49775e-07	612.43	-0.296427	0.301498	0.297247	0.469752
ENSMUSG00000051590	Map3k19	13.8832	0.133938	0.317165	0.145283	0.373895	5.62018	-0.0148752	0.15388	0.397126		19.9292	1.10133	0.830957	0.0148348	0.0463746
ENSMUSG00000036104	Rab3gap1	4779.17	-0.0452285	0.0816488	0.545074	0.78352	4635.52	0.0155753	0.0780964	0.824956	0.936141	4723.75	-0.430621	0.0834704	1.66283e-07	1.6645e-06	253.258	0.0836325	0.360087	0.804001	0.883739
ENSMUSG00000036086	Zranb3	441.881	-0.0707019	0.149989	0.579634	0.803543	402.039	-0.0980218	0.135564	0.243647	0.55191	443.267	-0.403866	0.156054	0.00629379	0.0224874	68.6223	0.105047	0.436487	0.787675	0.872979
ENSMUSG00000104164	RP24-338G10.1	6.95139	0.120624	0.318243	0.0772499		3.79896	0.0101326	0.153646	0.483347		9.30642	0.776693	1.24436	0.0265975	0.0748754	1.97113	0.264243	0.943059	0.367913
ENSMUSG00000102782	RP23-264E23.2	12.8231	-0.0248634	0.274155	0.776161	0.90815	16.5916	0.0232105	0.1534	0.435577		13.2084	-0.141533	0.453528	0.533992	0.706692
ENSMUSG00000103999	RP23-264E23.1	16.4827	0.0023014	0.271426	0.982806	0.9933	11.0035	-0.0278034	0.155865	0.222458		18.7177	0.0176172	0.422346	0.942788	0.969667	2.24608	-0.213827	0.916031	0.482123
ENSMUSG00000056211	R3hdm1	3741.12	-0.130667	0.0833373	0.100482	0.294309	3672.91	-0.0241503	0.0757568	0.71287	0.888563	4004.83	-0.268477	0.0796008	0.000625622	0.00297749	1294.51	-0.6175	0.239861	0.00751913	0.0330478
ENSMUSG00000101535	Gm29383	4.89007	-0.0346891	0.2859	0.528251		5.60252	-0.00357798	0.152881	0.834604		6.24837	-0.0673469	0.475603	0.699205	0.826316
ENSMUSG00000104239	RP23-114N13.2	17.8174	-0.111756	0.299178	0.254617	0.525491	18.495	-0.0255161	0.153509	0.416374		23.954	-0.111237	0.401486	0.655923	0.796463	6.32026	-5.84391	3.10616	0.00063533	0.00477634
ENSMUSG00000102179	RP23-114N13.3	10.9625	-0.0877422	0.293682	0.293354	0.569158	12.5036	-0.00677815	0.152039	0.778709		13.2909	-0.172773	0.461386	0.457723	0.643386	15.8356	-1.87924	1.10509	0.010112	0.041589
ENSMUSG00000103497	RP23-114N13.4	9.00621	-0.0151286	0.27805	0.838105	0.937987	7.0611	-0.013171	0.153546	0.47341		9.36471	-0.0780137	0.464674	0.691087	0.82132	11.258	-1.46413	1.26844	0.030682	0.0952451
ENSMUSG00000026353	Ubxn4	3639.22	-0.121748	0.0829775	0.124477	0.337384	3493.29	-0.0698592	0.0774097	0.296152	0.609965	4272.22	0.0128256	0.0782434	0.868551	0.931799	1143.28	-1.42001	0.338899	8.2215e-06	0.000132173
ENSMUSG00000026354	Lct	130.926	1.79953	0.305361	2.32137e-10	1.39411e-08	66.4771	0.0967448	0.182482	0.112223	0.359619	225.148	2.59727	0.251877	5.55789e-26	3.65125e-24	20.8004	0.402121	0.64404	0.406232	0.577503
ENSMUSG00000026355	Mcm6	2983.58	0.0841676	0.0913245	0.331025	0.608622	2954.44	0.183355	0.0864148	0.0129545	0.0905438	3559.62	0.266131	0.0802224	0.000772961	0.00358993	800.212	-1.94225	0.347359	4.00044e-09	1.68081e-07
ENSMUSG00000026356	Dars	632.583	0.198313	0.144618	0.114904	0.32081	607.419	0.167475	0.148266	0.0793504	0.292673	706.473	0.220709	0.150281	0.123729	0.25495	491.159	-0.744909	0.403092	0.0399526	0.115348
ENSMUSG00000100078	Gm6170	6.89972	0.0251333	0.281679	0.706566		6.78622	0.00808647	0.152963	0.669266		5.75854	-0.0560922	0.474507	0.74422
ENSMUSG00000045382	Cxcr4	45.2033	-0.00644115	0.246751	0.957436	0.984967	44.9248	0.0101797	0.147339	0.817608		39.9701	-0.454939	0.455787	0.125043	0.256904	15.0783	0.962703	0.80106	0.0837102	0.196373
ENSMUSG00000097283	Gm26686	9.1292	0.0445466	0.282127	0.5587	0.792179	5.6608	-0.00796659	0.15311	0.647621		6.55414	-0.101518	0.478465	0.580957	0.743566
ENSMUSG00000042581	Thsd7b	823.026	0.0473774	0.132164	0.687677	0.86445	841.072	0.193682	0.128894	0.0385378	0.187521	834.498	-0.211662	0.123258	0.0742667	0.172057	155.355	1.07989	0.369874	0.00155581	0.00971249
ENSMUSG00000089648	Gm15790	5.04215	0.0111759	0.282108	0.852589		4.77975	0.00310497	0.152969	0.852823		3.27461	-0.148239	0.517975	0.273471
ENSMUSG00000026401	Daf2	48.335	-0.11636	0.267837	0.39067	0.663727	40.3328	-0.0838924	0.179537	0.0804523		58.7541	-0.0936569	0.317686	0.703823	0.829028	32.651	0.519664	0.682668	0.291801	0.463968
ENSMUSG00000087691	Gm15674	3.32694	-0.00793011	0.284163	0.868089		4.09664	0.00428588	0.15314	0.78051		4.23684	0.0109811	0.478578	0.946601
ENSMUSG00000086825	Gm15675	3.48156	-0.00874345	0.283852	0.86039		4.95846	0.00879592	0.153332	0.590548		3.39585	-0.0668842	0.491914	0.622087
ENSMUSG00000026399	Cd55	3519.11	-0.287736	0.0953341	0.00133621	0.0116411	3483.21	-0.132258	0.0877703	0.0712162	0.274093	3473.15	-0.7331	0.100667	1.07698e-13	2.3824e-12	693.658	1.09524	0.280376	4.27831e-05	0.000528346
ENSMUSG00000102139	RP24-483O2.1	2.72279	0.0216253	0.285941	0.630167												2.71158	0.429167	1.07208	0.0763877
ENSMUSG00000042554	Zp3r	64.4878	-0.141188	0.258062	0.339395	0.616615	65.9175	-0.0187618	0.144372	0.721746	0.892725	64.0906	-0.565314	0.386917	0.0514915	0.128611	8.84511	0.570393	0.94486	0.233913	0.400868
ENSMUSG00000026405	C4bp	2.82789	-0.0146732	0.28577	0.722612		2.85992	-0.00231356	0.153458	0.829246		3.84542	-0.00495431	0.485	0.968965		5.46905	-0.137646	0.875888	0.679225	0.798006
ENSMUSG00000100257	C4bp-ps1	6.852	0.0179607	0.281983	0.774862		5.13447	-0.00270085	0.153035	0.861223		8.94094	0.132095	0.482931	0.499713	0.678872
ENSMUSG00000026409	Pfkfb2	75.8963	0.344328	0.334689	0.0681704	0.228346	63.8759	0.0468488	0.152973	0.374357	0.678102	82.6695	0.44512	0.327791	0.0893114	0.198171	18.6517	0.124713	0.674031	0.794467	0.877075
ENSMUSG00000046404	Yod1	82.3147	2.04755	0.384741	5.49378e-09	2.53914e-07	51.2488	0.988158	0.578152	0.00233567		77.3546	1.7199	0.405648	1.94298e-06	1.59833e-05	403.987	2.23587	0.74723	0.000317318	0.00269922
ENSMUSG00000104515	RP24-87I22.4	6.65037	0.042851	0.285206	0.511137		7.16598	0.018034	0.154117	0.364035		4.92079	-0.0395577	0.47653	0.808379
ENSMUSG00000042510	AA986860	32.461	0.066705	0.269737	0.559204	0.792406	31.964	0.0310267	0.15271	0.436249		37.8158	0.228992	0.384878	0.390386	0.580997	28.1535	8.87532	2.82185	1.2375e-09	5.91753e-08
ENSMUSG00000100106	Gm28856	66.573	-0.0589629	0.234619	0.673033	0.856859	73.6146	0.0403373	0.148653	0.469527	0.751179	73.9985	-0.11966	0.2977	0.618566	0.770682
ENSMUSG00000026415	Fcamr	298.908	-0.0368394	0.15857	0.779664	0.909951	308.114	0.0777895	0.134094	0.335755	0.644158	313.905	-0.209486	0.179987	0.212063	0.379815	2.84805	-0.134086	0.860354	0.710239	0.819582
ENSMUSG00000026417	Pigr	5.45864	-0.0472305	0.287826	0.416556		9.44803	0.0158045	0.153375	0.478744		7.47112	-0.0490242	0.468824	0.786095	0.883588
ENSMUSG00000042474	Faim3	3.04076	0.01585	0.28515	0.730776
ENSMUSG00000026416	Il20	27.4214	-0.050797	0.263654	0.656739	0.848359	26.9027	-0.00766987	0.14969	0.826274		22.4583	-0.926422	0.729152	0.0216228	0.0631632	15.4124	1.31355	0.999885	0.039042	0.113349
ENSMUSG00000016528	Mapkapk2	584.147	-0.678288	0.149784	8.57115e-07	2.27838e-05	569.395	-0.51423	0.191219	0.000494005	0.00817386	715.165	-0.380914	0.134577	0.00320496	0.0125232	83.3713	1.26842	0.400194	0.000537089	0.0041476
ENSMUSG00000102856	RP23-122P5.3	25.6463	-0.075795	0.275696	0.483812	0.740561	22.556	-0.0329342	0.155452	0.302921		26.2133	-0.315228	0.486629	0.235612	0.409478	3.28688	0.537286	1.15924	0.0437492	0.123196
ENSMUSG00000016526	Dyrk3	729.69	-0.141169	0.15403	0.280811	0.556	835.302	0.228156	0.165891	0.0319101	0.165952	802.07	-0.217387	0.147755	0.123848	0.255074	182.033	-1.21914	0.352361	0.00020195	0.00185637
ENSMUSG00000026427	Eif2d	952.88	0.0626224	0.11538	0.554088	0.789155	888.014	0.0191016	0.0982024	0.801752	0.928121	1100.52	0.161755	0.114356	0.147365	0.29097	234.349	-0.808371	0.434942	0.0360055	0.106806
ENSMUSG00000026430	Rassf5	1835.19	-0.53169	0.105767	1.09611e-07	3.72219e-06	1839.11	-0.314411	0.108397	0.000585167	0.00933037	2088.24	-0.482778	0.102234	1.37719e-06	1.16118e-05	222.256	0.676076	0.309785	0.0204014	0.0708084
ENSMUSG00000101729	Gm17796	3.34088	0.0789079	0.303068	0.0180226							3.21645	0.246383	0.589	0.0234442
ENSMUSG00000042349	Ikbke	17.1652	-0.0234135	0.270743	0.80342	0.92162	13.9139	-0.0220818	0.153669	0.413889		26.4687	0.30236	0.450336	0.267961	0.448216
ENSMUSG00000102055	Gm28913	8.20539	-0.0421099	0.282683	0.558204		7.67742	-0.0111454	0.153069	0.578324		6.97454	-0.328987	0.610322	0.1025	0.220652
ENSMUSG00000026425	Srgap2	1882.01	-0.532439	0.0998012	2.10532e-08	8.42908e-07	1907.72	-0.279011	0.100005	0.00104329	0.0141094	2073.94	-0.593659	0.0992142	9.92207e-10	1.36295e-08	255.265	0.590799	0.361063	0.075816	0.183001
ENSMUSG00000104060	RP24-81A5.2	27.3421	0.231997	0.373671	0.0996811	0.292857	14.7682	-0.014015	0.152356	0.596879		19.8482	-0.0109025	0.410374	0.961318	0.980345
ENSMUSG00000101778	Gm29488	28.1565	0.0723297	0.271572	0.525907	0.770507	20.4329	-0.0183188	0.151707	0.572999		20.7699	-0.405799	0.520272	0.157057	0.304522	2.87262	0.397177	1.00319	0.211828	0.374272
ENSMUSG00000055184	Fam72a	523.144	-0.822964	0.166543	8.62014e-08	2.99519e-06	647.51	0.0139881	0.106282	0.861753	0.949729	561.574	-1.02325	0.157116	1.41116e-11	2.46076e-10	278.745	0.623635	0.303251	0.0294511	0.0925614
ENSMUSG00000026432	Avpr1b	3.22446	0.00336655	0.283945	0.947472		2.79113	-0.0010634	0.153293	0.930669
ENSMUSG00000095841	Gm8532	6.75034	-0.0270382	0.281525	0.687341		6.81463	-0.00411434	0.152651	0.829284		6.20966	-0.141438	0.501804	0.40012	0.590552	1.63253	0.266804	0.934976	0.396238
ENSMUSG00000004552	Ctse	2.80969	0.0039218	0.284555	0.933279							4.43575	0.110879	0.494797	0.487429
ENSMUSG00000052688	5430435G22Rik	15.8443	-0.0579447	0.276916	0.54727	0.784904	15.1023	-0.0152368	0.152173	0.58985		19.2791	-0.0568898	0.41208	0.811606	0.897908
ENSMUSG00000042268	Slc26a9	740.511	-0.18347	0.131312	0.115663	0.321886	695.046	-0.156163	0.132152	0.0869074	0.309504	745.85	-0.5426	0.137042	3.71127e-05	0.000237357	151.646	0.786145	0.505449	0.0683645	0.170587
ENSMUSG00000042251	Pm20d1	11.4537	0.0708111	0.286083	0.410972	0.681778	6.125	-0.0140336	0.153673	0.440242		8.37979	-0.0799917	0.462465	0.687531	0.819467	3.82702	0.136904	0.844246	0.72578	0.830894
ENSMUSG00000013275	Slc41a1	584.14	0.142701	0.136891	0.236846	0.503668	482.185	-0.118967	0.136118	0.17349	0.462393	573.347	-0.184246	0.141544	0.174257	0.328546	177.237	0.861411	0.412323	0.0204492	0.0708732
ENSMUSG00000026433	Rab29	31.2714	1.70554	0.712531	0.000672095	0.00661823	25.7618	1.20109	0.949702	0.00383626		37.4879	1.97686	0.594948	6.4399e-05	0.000392477	29.7265	0.170408	0.625649	0.718242	0.82589
ENSMUSG00000026434	Nucks1	1577.43	0.0365552	0.10033	0.698264	0.870029	1622.65	0.219235	0.10579	0.0105401	0.0787316	1758.28	0.0342962	0.0974236	0.720517	0.841351	231.449	0.553507	0.433875	0.150761	0.295687
ENSMUSG00000103569	RP24-325N3.3	48.5882	0.117272	0.265124	0.397033	0.668943	41.9967	0.0126874	0.147414	0.776241		43.3867	-0.137433	0.352711	0.590356	0.750294	9.50882	-0.935703	0.902395	0.0969124	0.217785
ENSMUSG00000026435	Slc45a3	6407.42	0.0828701	0.0819355	0.29153	0.566975	6091.31	0.0803126	0.0785257	0.236369	0.542581	6516.87	-0.181204	0.0873944	0.0345785	0.0932542	1248.88	0.159227	0.38433	0.649216	0.776912
ENSMUSG00000026436	Elk4	5809.04	-0.229405	0.0795799	0.00261146	0.0197259	5645.56	-0.134282	0.0769624	0.0451868	0.207872	6441.71	-0.262441	0.0745919	0.000371035	0.00187806	1036.3	0.471922	0.267296	0.0653073	0.165007
ENSMUSG00000059149	Mfsd4	781.888	-0.193577	0.132777	0.0999168	0.293288	742.326	-0.131444	0.126975	0.134546	0.400694	898.282	-0.131899	0.12361	0.27061	0.451433	133.616	0.272153	0.492118	0.519294	0.676226
ENSMUSG00000103966	RP24-340N18.1	28.945	0.0528686	0.262028	0.655524	0.847695	21.5031	-0.0236814	0.152572	0.478036		26.3005	-0.151294	0.400495	0.552707	0.720823	2.37478	-0.0296587	0.838169	0.934956
ENSMUSG00000026437	Cdk18	4.70248	-0.0507387	0.289016	0.370971		3.39031	-0.0199103	0.155404	0.0869937		8.59491	0.0793659	0.461575	0.696825	0.824938	8.51295	-1.02355	1.22914	0.073814	0.179701
ENSMUSG00000079330	Lemd1	55.5223	0.0472041	0.245781	0.723904	0.882607	45.016	-0.0251314	0.150288	0.549428		49.1665	-0.344638	0.385573	0.208975	0.375768	15.7581	0.778661	0.819006	0.148226	0.292402
ENSMUSG00000118219		4.06619	-0.0552271	0.29151	0.279717		3.40066	-0.0158711	0.154637	0.182085		9.85779	0.185555	0.488881	0.39012	0.580876
ENSMUSG00000042115	Klhdc8a	5.68971	-0.0390124	0.284891	0.52996		4.93707	-0.0136095	0.153847	0.404774		8.34108	0.0224295	0.45913	0.911332	0.955216
ENSMUSG00000009772	Nuak2	25.8451	0.0027609	0.26217	0.982341	0.993167	22.0337	-0.01418	0.151249	0.655271		36.1538	0.302232	0.423871	0.271973	0.453049	13.684	1.74902	1.11017	0.0144006	0.0542401
ENSMUSG00000100658	F730311O21Rik	2.45002	0.00296452	0.285023	0.947016
ENSMUSG00000042066	Tmcc2	2641.26	0.0327762	0.0873839	0.694668	0.867911	2460.18	-0.00694736	0.0801948	0.918265	0.970218	2759.09	-0.157299	0.0855986	0.0621696	0.14961	201.804	0.128628	0.386003	0.716802	0.824925
ENSMUSG00000042046	Dstyk	2755.97	-0.476901	0.0910563	4.36244e-08	1.61377e-06	2826.59	-0.194757	0.0883434	0.00954563	0.0728185	3166.76	-0.395744	0.100815	7.49734e-05	0.000449737	493.397	0.27962	0.416307	0.456359	0.623906
ENSMUSG00000026439	Rbbp5	757.012	-0.00271643	0.13824	0.980004	0.992656	788.837	0.148829	0.144537	0.107358	0.349992	912.281	0.192116	0.142468	0.15819	0.306036	125.628	-0.302147	0.348904	0.348065	0.522755
ENSMUSG00000048174	Tmem81	12.7476	-0.037885	0.276365	0.663989	0.852573	15.3225	0.011232	0.151757	0.689733		23.4172	0.424884	0.515365	0.148431	0.292413	1.82097	-0.0719287	0.872657	0.822625
ENSMUSG00000053024	Cntn2	142.893	0.0436533	0.198145	0.76438	0.901521	119.843	-0.0613222	0.1501	0.352842	0.659406	161.774	0.0897295	0.231334	0.664259	0.802417	18.5362	0.464394	0.893745	0.31571	0.489577
ENSMUSG00000026442	Nfasc	46.1447	0.0846656	0.257215	0.525616	0.77038	47.6396	0.0533324	0.158165	0.272283		49.1209	0.0929421	0.338922	0.715998	0.837899	6.6864	0.529342	0.847123	0.28729	0.459549
ENSMUSG00000026443	Lrrn2	3.92245	-0.00963941	0.283533	0.850191		4.38032	0.00229751	0.153031	0.885792		7.30455	0.172822	0.501937	0.365592	0.556489
ENSMUSG00000102709	RP23-393D20.1	2.81662	0.0356804	0.28856	0.396913		2.55007	0.00685391	0.153744	0.492214
ENSMUSG00000054387	Mdm4	65631.6	-0.234929	0.0714345	0.000667835	0.00658295	62882.4	-0.18407	0.072912	0.00487158	0.0450535	71834	-0.308225	0.0705086	1.09145e-05	7.78406e-05	28185.1	0.259982	0.294675	0.354728	0.528853
ENSMUSG00000100228	Gm29257	12.0683	-0.168283	0.34547	0.0718392	0.235685	18.9865	0.00995296	0.151012	0.750164		14.654	-0.42182	0.598456	0.122417	0.25287	2.67422	-0.460699	1.098	0.0589136
ENSMUSG00000026447	Pik3c2b	3720.49	-0.302167	0.0849969	0.000192054	0.00234001	3643.06	-0.177882	0.0839599	0.0136159	0.0936816	4107.76	-0.351468	0.0821455	1.397e-05	9.73059e-05	357.899	0.312768	0.308775	0.284104	0.456035
ENSMUSG00000101102	Gm28609	3.61188	-0.0483966	0.290026	0.327342		4.59695	-0.00407489	0.15301	0.801499		4.0573	-0.133404	0.508876	0.359888		1.92562	-0.0245578	0.883786	0.931234
ENSMUSG00000102425	RP23-304O9.1	42.205	-0.111623	0.26758	0.404317	0.676166	32.5662	-0.0927428	0.190414	0.0347424		40.7718	-0.606171	0.472345	0.056308	0.138118	17.0321	-0.0768935	0.668468	0.866774	0.923771
ENSMUSG00000046062	Ppp1r15b	2347.76	-0.00569257	0.109325	0.954082	0.983343	2261.46	0.0261852	0.0969412	0.730019	0.897704	3343.55	0.609464	0.103694	1.89987e-09	2.50836e-08	427.823	-0.966488	0.287678	0.000401165	0.00326965
ENSMUSG00000041757	Plekha6	1692.95	0.161142	0.0984331	0.0807608	0.254732	1570.68	0.0894131	0.0922149	0.231849	0.536167	1936.66	0.236098	0.0927707	0.00958252	0.0322208	125.988	0.859703	0.473628	0.0374159	0.110046
ENSMUSG00000101693	Gm19461	195.467	-0.0736832	0.188712	0.606411	0.820637	176.511	-0.0768714	0.149448	0.296361	0.610132	219.939	-0.0735125	0.217356	0.706447	0.830676	21.7349	1.21453	0.880892	0.0421644	0.120184
ENSMUSG00000070645	Ren1	10.052	0.0666431	0.288522	0.379221	0.653171	7.28295	0.00371291	0.152639	0.850159		11.8309	0.240356	0.510011	0.286666	0.470749
ENSMUSG00000070644	Etnk2	11.5709	0.0876145	0.293174	0.303376	0.580603	7.18546	-0.00245246	0.152578	0.897211		12.4873	0.221403	0.489795	0.33904	0.529058	10.0264	0.571765	0.877622	0.254958	0.424516
ENSMUSG00000070643	Sox13	115.198	0.141937	0.230184	0.354164	0.63023	111.757	0.081335	0.160371	0.257356	0.56728	133.895	0.285238	0.269474	0.213366	0.381383	33.4065	-2.42085	0.675084	3.79678e-05	0.000478358
ENSMUSG00000090553	Snrpe	1716.3	-0.476913	0.108203	2.73144e-06	6.39571e-05	1726.64	-0.24256	0.112094	0.00697446	0.058767	1544.44	-1.40949	0.107039	1.63762e-40	2.63779e-38	1677.07	-0.288822	0.341422	0.369737	0.542196
ENSMUSG00000102976	Zc3h11a	92.028	0.0783204	0.22638	0.592011	0.8109	80.9424	-0.00544836	0.142265	0.918146	0.970218	125.44	0.566239	0.276628	0.0170606	0.0520095	47.7784	0.346554	0.539602	0.437329	0.606015
ENSMUSG00000094410	Zbed6	656.705	-0.581538	0.142101	7.71469e-06	0.000156367	656.433	-0.34663	0.160685	0.0037246	0.0371738	751.718	-0.518328	0.128502	2.8833e-05	0.000187998	79.8986	-0.294119	0.475593	0.470868	0.636473
ENSMUSG00000051998	Lax1	7.39103	0.0964184	0.30394	0.154538							11.2664	0.946452	1.29536	0.0236046	0.0680025
ENSMUSG00000026463	Atp2b4	673.411	-0.19933	0.128723	0.0829276	0.259131	640.387	-0.131349	0.129256	0.136316	0.404036	730.353	-0.312263	0.126647	0.0106266	0.0351498	47.9897	-0.0361077	0.552794	0.932416	0.962284
ENSMUSG00000102509	RP23-18J18.1	3.96019	-0.0138298	0.283768	0.790202		3.94228	-0.0028093	0.153082	0.851928		4.51498	-0.0352708	0.480114	0.819893
ENSMUSG00000100830	Gm28441	3.05814	0.016447	0.285867	0.695798							2.81855	0.0207698	0.490053	0.870958
ENSMUSG00000010311	Optc	7.55645	0.0833728	0.296848	0.233795		4.05378	0.000113952	0.153044	0.996672		15.6292	1.64684	1.12088	0.00630013	0.0225064
ENSMUSG00000041577	Prelp	608.415	-0.216185	0.13566	0.0710213	0.234131	563.456	-0.225925	0.150626	0.028058	0.151433	615.813	-0.567723	0.139235	2.1611e-05	0.000145175	100.204	0.702457	0.371191	0.0388892	0.113081
ENSMUSG00000020423	Btg2	311.807	0.357307	0.20263	0.0258286	0.114612	259.379	0.0412394	0.12911	0.58234	0.821013	372.138	0.572353	0.171811	0.000401797	0.00201687	311.476	2.30156	0.391976	6.51857e-10	3.34829e-08
ENSMUSG00000026450	Chit1	347.399	-0.222002	0.182217	0.127067	0.342162	345.514	-0.056104	0.128337	0.469324	0.751067	423.196	-0.0279276	0.164195	0.856142	0.924691	115.83	-0.35713	0.499926	0.397048	0.568989
ENSMUSG00000042451	Mybph	3.16457	0.0154049	0.28586	0.706679							5.31221	0.168897	0.519397	0.276763
ENSMUSG00000042429	Adora1	3.82467	-0.0315032	0.28675	0.512584		4.78966	-0.00169015	0.152908	0.916915		13.0906	0.564516	0.779117	0.0612503	0.147791	2.41209	0.34069	0.976216	0.265366
ENSMUSG00000026459	Myog	3.48587	0.0518318	0.291472	0.269976							2.33675	0.0482451	0.496285	0.672979
ENSMUSG00000026458	Ppfia4	107.541	0.49009	0.318711	0.0193546	0.0927135	91.133	0.0885209	0.169525	0.180678	0.471523	160.955	1.26127	0.269335	3.98407e-07	3.71818e-06	12.6737	-0.16974	0.782647	0.697523	0.81044
ENSMUSG00000042305	Tmem183a	1391.39	-0.0700405	0.102613	0.463889	0.725502	1301.25	-0.075885	0.0970658	0.321149	0.631898	1509.3	-0.163002	0.108292	0.122585	0.253049	773.067	0.683023	0.25497	0.00527035	0.0251955
ENSMUSG00000026456	Cyb5r1	22.92	0.112765	0.289906	0.317931	0.595696	16.3819	-0.00317803	0.151412	0.90276		25.159	0.260371	0.441897	0.32824	0.517928	95.3878	2.54694	0.675242	1.48255e-05	0.000217576
ENSMUSG00000026457	Adipor1	979.154	0.267769	0.119436	0.0138422	0.0724424	906.961	0.174034	0.119369	0.0506853	0.223036	1202.39	0.522822	0.111399	1.45882e-06	1.22384e-05	619.926	-0.668105	0.317733	0.024647	0.0811116
ENSMUSG00000101061	Gm29643	23.4076	0.0250286	0.263885	0.8205	0.929366	19.0064	-0.0140459	0.151337	0.654223		20.6779	-0.196683	0.445382	0.432706	0.62038	8.34645	-6.65125	2.94727	7.12651e-05	0.000801229
ENSMUSG00000102722	RP24-547I3.2	11.0102	-0.0462297	0.279891	0.577873	0.802646	8.58507	-0.0224361	0.154992	0.257155		13.4769	-0.0539143	0.436225	0.808396	0.896363	3.4326	-0.179518	0.870722	0.618793	0.755144
ENSMUSG00000026455	Klhl12	2411.19	-0.172006	0.0902138	0.043908	0.168547	2407.7	-0.0188748	0.0824071	0.78531	0.921443	2659.08	-0.222173	0.0866037	0.00912165	0.0309246	575.809	-0.634922	0.298048	0.0239136	0.079416
ENSMUSG00000042229	Rabif	667.111	0.0342245	0.124535	0.757416	0.897953	678.394	0.14411	0.134501	0.112002	0.359105	832.111	0.321403	0.122813	0.00686865	0.0242112	482.457	-0.597244	0.296151	0.0326578	0.0995242
ENSMUSG00000077202	Gm25612	5.14075	0.0128484	0.282282	0.829105		2.89201	-0.00930644	0.153806	0.427318		3.27461	-0.148239	0.517975	0.273471
ENSMUSG00000096712	Gm15454	16.6878	0.00332073	0.269189	0.975217	0.990644	16.711	0.00588021	0.151397	0.833793		18.8779	0.0165084	0.413836	0.947527	0.97262	1.81887	-0.188783	0.875312	0.597263
ENSMUSG00000101955	Gm29376	7.12683	0.024996	0.281726	0.709254		5.75079	4.74008e-05	0.152876	0.999644		6.9082	0.0106295	0.46613	0.956616	0.978437
ENSMUSG00000046367	Mgat4e	18.9307	0.160023	0.330432	0.124877	0.33795	18.1419	0.0384807	0.158687	0.14934		19.8239	0.406802	0.555158	0.150605	0.295249	15.4507	-0.255098	0.619736	0.583579	0.729259
ENSMUSG00000042207	Kdm5b	6117.2	-0.205247	0.0835374	0.0099375	0.0567715	6417.91	0.0600203	0.0869511	0.400824	0.702346	7627.95	0.101289	0.0776872	0.189161	0.348905	1648.07	-1.4944	0.294367	1.0679e-07	3.17939e-06
ENSMUSG00000097435	Gm26783	32.6961	0.443295	0.623242	0.0303468	0.128871	19.4105	0.00623351	0.150577	0.846225		39.8858	1.05712	0.551784	0.00691826	0.0243348	6.33547	0.56198	1.00783	0.205207	0.365934
ENSMUSG00000026452	Syt2	64.9288	0.314614	0.34852	0.0825954	0.258508	59.4624	0.0767103	0.170209	0.152644	0.429034	92.5517	1.08473	0.343737	0.000243835	0.00129511	16.981	0.906299	1.09196	0.0984683	0.22013
ENSMUSG00000073557	Ppp1r12b	561.676	0.0124061	0.13741	0.919331	0.971896	525.774	-0.00596302	0.108413	0.937273	0.977453	611.388	-0.0511838	0.133491	0.689977	0.820449	89.0397	1.25735	0.435007	0.00136257	0.00873361
ENSMUSG00000103614	RP24-541A5.3	10.3761	-0.0373789	0.279456	0.637412	0.838024	10.0025	-0.00996438	0.152449	0.670086		10.6971	-0.187191	0.480637	0.399763	0.590266
ENSMUSG00000103976	RP24-541A5.1	6.02323	0.117521	0.31865	0.0525123		6.47948	0.0341756	0.158769	0.038169		9.25955	1.9105	1.70064	0.00887688	0.0302031	2.38313	0.253061	0.900643	0.477666
ENSMUSG00000026429	Ube2t	371.876	-0.137885	0.154121	0.290722	0.566309	416.352	0.166878	0.155561	0.0827835	0.300841	421.052	-0.121987	0.160637	0.42229	0.611165	536.413	0.318544	0.416419	0.39494	0.567011
ENSMUSG00000042793	Lgr6	212.857	-0.114582	0.181804	0.419574	0.689037	196.746	-0.0816277	0.147756	0.288183	0.601443	215.475	-0.444424	0.219232	0.0242475	0.0693584	35.6427	0.0443213	0.501598	0.919606	0.955536
ENSMUSG00000097993	Ptprv	124.98	0.0286481	0.206086	0.844279	0.940127	116.375	0.00425111	0.136588	0.947834	0.981341	133.799	-0.0459952	0.240136	0.825916	0.906587
ENSMUSG00000031506	Ptpn7	21.7955	0.105588	0.288652	0.333864	0.611094	17.2875	0.0074955	0.151351	0.794009		28.0345	0.418392	0.534152	0.148432	0.292413
ENSMUSG00000026426	Arl8a	451.025	-0.0125333	0.148811	0.919948	0.972052	428.947	0.00173147	0.115719	0.98336	0.995255	455.987	-0.296421	0.158335	0.0477013	0.121092	48.2248	0.104712	0.418168	0.781727	0.869428
ENSMUSG00000026424	Gpr37l1	4.97658	0.0416962	0.286927	0.458652		3.10934	0.000257881	0.153228	0.986992		4.34998	0.0433429	0.484108	0.771244		2.01786	-0.356809	1.02875	0.111516
ENSMUSG00000079139	Gm4204	865.326	-0.599046	0.128729	5.81425e-07	1.61389e-05	911.393	-0.196032	0.124029	0.0329231	0.169068	971.163	-0.59937	0.117823	1.63513e-07	1.63928e-06	114.113	-1.41305	0.471825	0.000747163	0.00541671
ENSMUSG00000097680	Gm26642	9.26852	0.0288404	0.279285	0.707667	0.874132	6.76951	-0.00529371	0.152868	0.767636		10.0486	0.05422	0.453492	0.794983	0.888639	2.92984	0.453475	1.0618	0.122143	0.255991
ENSMUSG00000003051	Elf3	689.547	-0.380476	0.148617	0.00357672	0.0252341	548.545	-1.06443	0.170766	2.48741e-11	5.77812e-09	788.896	-0.337372	0.136518	0.0100504	0.0335449	174.446	0.121141	0.440768	0.757855	0.853643
ENSMUSG00000041926	Rnpep	419.876	0.132767	0.149761	0.301348	0.578447	395.861	0.0767413	0.12718	0.344225	0.652695	464.025	0.133738	0.150351	0.352114	0.542453	333.397	0.0960453	0.332587	0.759782	0.854989
ENSMUSG00000062580	Timm17a	547.546	0.0908466	0.135856	0.457565	0.720627	523.057	0.0726386	0.116455	0.372767	0.676876	693.366	0.417433	0.131227	0.000963278	0.00437205	1440.7	-1.79473	0.513972	8.74695e-05	0.00094206
ENSMUSG00000048096	Lmod1	66.2297	2.55886	0.437715	3.02818e-10	1.80191e-08	37.7668	1.41689	0.624646	0.000731495		61.1152	2.21193	0.451769	7.46783e-08	7.87527e-07	7.04278	-0.296727	0.833059	0.496274	0.656791
ENSMUSG00000041889	Shisa4	8.61312	0.0446556	0.283076	0.544594		7.739	0.00923726	0.15282	0.655974		6.64634	-0.0576287	0.470066	0.750238	0.86194	2.13401	0.198064	0.916528	0.487687
ENSMUSG00000041879	Ipo9	2395.2	0.00163097	0.0920643	0.986018	0.994502	2298.92	0.0316269	0.0816389	0.648789	0.854593	2637.15	-0.0393801	0.0875195	0.645689	0.789836	235.599	-0.560591	0.308076	0.0529888	0.141513
ENSMUSG00000009418	Nav1	1374.2	-0.00755552	0.100152	0.934876	0.976846	1358.11	0.0800142	0.0933819	0.288413	0.601449	1562.89	0.0387105	0.102573	0.700924	0.82714	333.456	0.160572	0.373431	0.642002	0.771236
ENSMUSG00000026421	Csrp1	850.293	0.08876	0.117963	0.407083	0.67831	798.607	0.0491106	0.105373	0.530418	0.791383	858.224	-0.181167	0.121056	0.122162	0.252607	36.9381	1.00349	0.778108	0.0700916	0.173462
ENSMUSG00000026418	Tnni1	2.64246	0.019747	0.286273	0.634385												5.40356	0.73752	1.3081	0.0578748	0.151489
ENSMUSG00000041782	Lad1	4.0705	0.00675859	0.283161	0.902686		4.03569	0.0028847	0.153107	0.852005		6.94866	0.187192	0.507564	0.335118	0.525081	1.75445	0.328238	0.949223	0.334352
ENSMUSG00000026414	Tnnt2	3.08064	0.0191773	0.286135	0.647412							5.3478	0.215208	0.538008	0.208644
ENSMUSG00000101482	Gm28883	8.65484	-0.0566547	0.285802	0.445756		11.0491	0.00384034	0.15189	0.877867		10.0275	-0.151349	0.474268	0.475791	0.659124	2.23951	0.305804	0.961484	0.303307
ENSMUSG00000026413	Pkp1	9.71887	0.0102663	0.278473	0.89158	0.960277	13.9167	0.0304216	0.156176	0.232226		14.9305	0.244591	0.494324	0.310097	0.498416	2.01445	-0.311132	0.964722	0.288219
ENSMUSG00000051985	Igfn1	21.4897	-0.0700497	0.274057	0.515779	0.763158	18.0079	-0.0364955	0.156939	0.237617		21.1403	-0.379787	0.513273	0.174175	0.328429
ENSMUSG00000026411	Tmem9	50.5811	-0.0621007	0.24549	0.644386	0.842076	56.709	0.0340939	0.149282	0.501702	0.772607	51.8277	-0.285826	0.38229	0.286924	0.470967	11.1827	0.771915	1.03306	0.140792	0.282424
ENSMUSG00000026407	Cacna1s	10.3553	0.0409043	0.27949	0.617594	0.826489	8.43001	0.00142223	0.152233	0.950869		10.7408	0.0634348	0.448277	0.769718	0.873502
ENSMUSG00000086264	Gm15850	4.018	-0.0175048	0.284494	0.72331		2.76042	-0.010953	0.154038	0.314569		6.2177	0.0615069	0.472902	0.73414	0.851179
ENSMUSG00000041642	Kif21b	897.101	-0.0390391	0.118736	0.717003	0.878791	939.074	0.15628	0.126835	0.0819664	0.299247	1012.01	-0.0176091	0.116442	0.875431	0.935911	34.1932	0.47599	0.765461	0.340923	0.515256
ENSMUSG00000087230	Mroh3	66.9123	0.0856705	0.240388	0.548683	0.785459	59.0063	0.0051474	0.144887	0.917849	0.970091	62.7899	-0.172871	0.334181	0.49453	0.674288	17.3115	1.48838	1.12301	0.0284178	0.0902085
ENSMUSG00000041605	5730559C18Rik	18.8951	-0.00100247	0.266612	0.989554	0.996028	16.3225	-0.0106342	0.151353	0.717775		22.9143	0.088851	0.402354	0.723171	0.843499	2.59912	0.238457	0.951037	0.337828
ENSMUSG00000103594	RP23-211F21.3	2.71108	0.00189102	0.284609	0.968657							3.84704	0.0524766	0.488826	0.706254
ENSMUSG00000102941	RP23-211F21.4	3.20231	0.0147847	0.284612	0.761045							3.38463	0.0340838	0.485515	0.813115
ENSMUSG00000097433	Gm26781	8.56313	0.074483	0.293101	0.291681		4.62948	-0.00278189	0.15302	0.858027		7.35785	0.0970748	0.473322	0.612716	0.7666
ENSMUSG00000041570	Camsap2	18797.7	-0.0593386	0.0723006	0.395757	0.668125	17983.2	-0.0294551	0.0650713	0.65914	0.86001	21559	0.0106567	0.068066	0.852832	0.922826	1275.36	0.262001	0.297507	0.354413	0.528595
ENSMUSG00000097403	9230116N13Rik	6.25305	0.075903	0.295798	0.227995							3.10973	-0.0342611	0.487682	0.799079		8.41839	0.11525	0.927872	0.562989	0.712144
ENSMUSG00000026404	Ddx59	709.439	-0.187136	0.128569	0.10312	0.299301	735.153	0.0262038	0.103859	0.734512	0.899872	770.106	-0.301252	0.128276	0.0148863	0.0464823	120.195	1.06723	0.441018	0.00673183	0.030381
ENSMUSG00000041498	Kif14	12057.3	-0.471388	0.0943637	1.58602e-07	5.10939e-06	11839.3	-0.340661	0.0816465	4.65505e-06	0.000182008	13083.6	-0.583688	0.0852915	2.67068e-12	5.08528e-11	979.863	0.520103	0.431379	0.176087	0.328728
ENSMUSG00000104414	RP24-68C1.3	3.97232	0.0763683	0.300107	0.104435
ENSMUSG00000104509	RP24-68C1.4	28.8923	0.324701	0.480525	0.0479037	0.179043	19.1598	0.0156011	0.151736	0.612833		22.9886	0.157368	0.419001	0.535038	0.707419	32.8594	-4.13312	0.744107	2.5504e-09	1.13266e-07
ENSMUSG00000104366	RP24-68C1.5	27.0463	0.0795357	0.278311	0.461914	0.724234	28.0936	0.0367122	0.156156	0.288115		28.59	0.133703	0.412296	0.597338	0.755004	60.9868	-4.87729	0.627883	8.36953e-16	1.51927e-13
ENSMUSG00000097229	Gm26598	76.0473	0.201053	0.278894	0.206148	0.462402	62.3246	0.0104487	0.146071	0.826323	0.936403	68.3285	-0.0721485	0.313717	0.768319	0.872752	58.3011	-5.23575	0.831706	4.0335e-11	2.84583e-09
ENSMUSG00000041483	Zfp281	1121.63	-0.572375	0.122327	5.61132e-07	1.56875e-05	1170.53	-0.193982	0.131888	0.0396774	0.190476	1297.32	-0.470032	0.106941	6.56612e-06	4.89119e-05	646.499	-1.15504	0.313612	9.35896e-05	0.00099423
ENSMUSG00000097113	Gm19705	91.5197	0.640876	0.370893	0.00815581	0.0485754	64.835	0.02692	0.146015	0.613768	0.836646	97.12	0.645047	0.317983	0.0144089	0.0452645	32.6412	-0.82061	0.558994	0.0743355	0.180547
ENSMUSG00000097448	Gm16880	50.4158	0.937119	0.653424	0.00652715	0.0409167	26.3126	0.00323186	0.150124	0.924257		62.4732	1.34892	0.510866	0.000841885	0.0038761	56.0766	-0.904184	0.58187	0.0549973	0.145546
ENSMUSG00000026398	Nr5a2	2352.84	-0.161494	0.0945053	0.0694184	0.230857	2374.19	0.00819095	0.0836203	0.894069	0.962459	2821.63	0.0301598	0.0913865	0.737334	0.853518	519.603	-1.2942	0.330327	3.06709e-05	0.000401298
ENSMUSG00000098243	Gm4258	17.0027	-0.00949717	0.271192	0.915364	0.970227	13.9348	-0.014578	0.152655	0.564203		16.9632	-0.128033	0.441876	0.583037	0.745016	4.07031	1.4074	2.37964	0.025102	0.0822379
ENSMUSG00000104118	RP23-393I12.1	19.6633	-0.0733427	0.277355	0.483584	0.740513	23.7525	0.0126514	0.15036	0.718181		18.2861	-0.541783	0.625752	0.0839151	0.189052
ENSMUSG00000102142	RP23-393I12.5	4.35245	-0.0532885	0.29101	0.28909		3.09629	-0.0191815	0.155431	0.0262732		3.99105	-0.258948	0.587455	0.0749882
ENSMUSG00000104145	RP23-44N5.3	3.49155	0.0383054	0.287737	0.437551
ENSMUSG00000103427	RP23-44N5.4	2.61987	-0.0440657	0.290524	0.276303							3.97639	-0.0610588	0.485853	0.682963
ENSMUSG00000026395	Ptprc	5.23892	-0.0902363	0.305101	0.0840092		4.30797	-0.0247229	0.156589	0.00935118		5.25244	-0.413526	0.769531	0.016724
ENSMUSG00000026393	Nek7	1057.27	-0.239113	0.121315	0.0294393	0.125952	1093.29	-0.00243998	0.0968676	0.973068	0.990736	1146.22	-0.355719	0.125455	0.00329542	0.0128398	214.386	0.795955	0.348205	0.0137954	0.0525855
ENSMUSG00000019230	Lhx9	12.5748	0.0142968	0.274706	0.868119	0.95019	12.006	0.00555667	0.151767	0.830524		18.1469	0.253674	0.479607	0.313368	0.502291	6.88107	3.14006	1.71679	0.00504211	0.0243399
ENSMUSG00000079283	2310009B15Rik	6.53755	-0.0367238	0.283632	0.572385		7.16127	-0.00270379	0.152546	0.888694		8.40248	-0.0261155	0.458036	0.891887	0.944302
ENSMUSG00000056268	Dennd1b	280.311	-0.189546	0.174509	0.179728	0.425813	283.736	-0.0194249	0.125077	0.791424	0.92429	312.54	-0.238957	0.175648	0.14545	0.288158	33.3586	-0.0201919	0.55115	0.960881	0.978301
ENSMUSG00000104436	RP23-114L12.3	5.68619	0.0238998	0.282721	0.701765		3.96663	-0.00340233	0.153135	0.818238		4.72511	-0.0397223	0.47805	0.80453
ENSMUSG00000104900		2.91694	-0.0195669	0.286074	0.643241		2.79679	-0.00508802	0.153507	0.65903		3.71776	-0.0384691	0.484439	0.789913
ENSMUSG00000063681	Crb1	274.243	-0.333416	0.19433	0.0314369	0.131832	268.672	-0.138416	0.164668	0.126237	0.385944	277.776	-0.728322	0.195434	6.28903e-05	0.000384575	43.0529	0.408515	0.649255	0.398609	0.570396
ENSMUSG00000102661	RP23-93C9.3	10.1771	0.0142879	0.276741	0.859639	0.947053	6.80402	-0.0156607	0.15381	0.411645		8.57384	-0.119508	0.477576	0.539315	0.71043	28.1378	1.46141	0.891574	0.0199991	0.0696579
ENSMUSG00000033964	Zbtb41	3284.36	-0.0828091	0.0872688	0.318671	0.596456	3314.69	0.0730652	0.0781459	0.278293	0.589733	3723.69	-0.0479126	0.0807945	0.547619	0.716969	591.286	0.212459	0.301165	0.45775	0.625032
ENSMUSG00000033952	Aspm	4887.83	-0.17943	0.0802987	0.0195988	0.0935604	4770.87	-0.0786649	0.0741046	0.224322	0.526939	5450.23	-0.194349	0.0800257	0.0137976	0.0436915	554.626	0.212619	0.286769	0.437119	0.605888
ENSMUSG00000026368	F13b	13.9528	0.0362785	0.274491	0.69449	0.867801	8.5995	-0.0212014	0.154518	0.316839		24.1578	0.713201	0.64939	0.045504	0.116588	3.21816	0.0344693	0.889034	0.906866	0.948357
ENSMUSG00000033898	Cfhr2	3.39384	0.0356376	0.287272	0.46665							4.101	0.138104	0.506479	0.372808
ENSMUSG00000089991	Gm16332	97.679	-0.063343	0.21704	0.661324	0.850949	84.8339	-0.0650064	0.158367	0.269801	0.580624	114.062	0.00438087	0.259713	0.986143	0.992717	18.6957	-0.879538	0.672754	0.0855878	0.199605
ENSMUSG00000104496	RP23-13N24.1	194.573	-0.040215	0.183486	0.775311	0.907647	167.965	-0.0941605	0.163598	0.204416	0.499842	219.893	-0.0218508	0.218468	0.91015	0.954654	51.0914	-1.11969	0.447549	0.00489036	0.0238112
ENSMUSG00000085867	Gm5834	18.4877	-0.349752	0.604773	0.0213793	0.0998318	19.6311	-0.0523171	0.163412	0.11149		23.2749	-0.510064	0.566588	0.0999424	0.216351	2.09829	-0.160625	0.866401	0.654881
ENSMUSG00000026365	Cfh	13.2422	0.0311164	0.274642	0.730573	0.886418	11.0042	-0.00216348	0.151772	0.927786		16.3247	0.170932	0.446593	0.483812	0.665118	8.4903	-0.0206757	0.734932	0.960443	0.978103
ENSMUSG00000101795	Gm5835	7.84921	0.0732868	0.292729	0.298398		5.20127	0.00496178	0.153006	0.771201		6.1126	0.0558236	0.472522	0.757141		3.60298	0.299221	0.905331	0.426286	0.596488
ENSMUSG00000026361	Cdc73	1082.25	-0.326163	0.117474	0.00242362	0.0186104	1021.56	-0.299459	0.129475	0.00321081	0.0331924	1129.25	-0.575032	0.115787	3.22229e-07	3.05976e-06	138.187	0.424685	0.45348	0.285746	0.457727
ENSMUSG00000033849	B3galt2	27.1173	0.0987323	0.280988	0.391368	0.664042	28.7442	0.0443624	0.158703	0.217407		28.4968	0.160394	0.406926	0.532625	0.70601	7.06561	-0.232753	0.848696	0.563836	0.712878
ENSMUSG00000089640	Gm6397	3.30831	-0.0218036	0.286149	0.609358		4.96612	0.00605712	0.153139	0.711168		2.92527	-0.13312	0.517863	0.254235
ENSMUSG00000018196	Glrx2	264.351	-0.454754	0.210774	0.00700191	0.0431559	284.301	-0.0527701	0.129851	0.489893	0.765264	288.085	-0.597706	0.209061	0.00176551	0.00745745	115.762	-1.5074	0.499257	0.000634166	0.00477143
ENSMUSG00000018199	Trove2	308.537	-0.324144	0.183556	0.0296367	0.126602	324.451	-0.0310331	0.122953	0.680654	0.8716	379.052	-0.096838	0.163268	0.52958	0.703746	80.4184	0.60612	0.422904	0.109013	0.236585
ENSMUSG00000018189	Uchl5	197.89	-0.150725	0.191461	0.30403	0.581235	205.829	0.0139468	0.129501	0.845198	0.944628	249.058	0.100097	0.191147	0.572467	0.73689	249.324	-0.0621659	0.444557	0.872277	0.927395
ENSMUSG00000100455	Gm29170	83.7556	-0.192906	0.260881	0.223981	0.487448	74.693	-0.107015	0.190253	0.0946133	0.325966	77.029	-1.00109	0.37835	0.0013279	0.00580638	14.4921	-0.0343372	0.794916	0.930308	0.961092
ENSMUSG00000026360	Rgs2	1597.91	-0.166435	0.116754	0.117032	0.324343	1581.27	-0.0370718	0.0906725	0.613063	0.836646	1362.87	-1.19581	0.112081	2.22306e-27	1.64985e-25	86.0799	0.859115	0.417713	0.0219806	0.0748445
ENSMUSG00000026358	Rgs1	4.85107	-0.106019	0.316424	0.00468458		4.59165	-0.0260265	0.156906	0.0074457		5.419	-0.465245	0.88448	0.0022966
ENSMUSG00000026357	Rgs18	12.4752	0.106008	0.304097	0.190356	0.440334	13.2982	0.0358605	0.158327	0.122321		9.44713	0.0574796	0.467457	0.759651	0.867529	2.21688	-0.39219	1.04974	0.0901749
ENSMUSG00000099964	Gm29514	4.1574	-0.0107597	0.283035	0.842291		4.26883	-0.000492723	0.153022	0.971811		4.15754	-0.0734603	0.486541	0.631572		2.2765	-0.00872631	0.85825	0.977694
ENSMUSG00000090323	Gm5263	4.95219	-0.0170893	0.283127	0.761397		3.78592	-0.0117732	0.153862	0.398381		5.64689	-0.0567334	0.477186	0.732362
ENSMUSG00000035131	Brinp3	90.3922	0.115411	0.235799	0.437605	0.704002	79.6895	0.0102775	0.142687	0.851542	0.946207	79.0959	-0.317696	0.323804	0.21256	0.380492	17.4338	0.913768	0.953072	0.10214	0.225761
ENSMUSG00000080078	Gm15583	3.31046	-0.0130384	0.284485	0.784251		3.69113	0.000327162	0.153185	0.983753		3.59159	-0.0519964	0.487945	0.708212
ENSMUSG00000085822	Gm15584	2.84139	-0.0382116	0.288724	0.379353		4.16752	0.000667601	0.153109	0.965941		5.74875	0.0526327	0.479945	0.745537
ENSMUSG00000056220	Pla2g4a	3.01727	-0.0438698	0.290221	0.304185		5.47729	0.00542919	0.153032	0.748985		5.36226	-0.00812111	0.472123	0.959329		3.63987	0.211313	0.807979	0.627677	0.761118
ENSMUSG00000032487	Ptgs2	39.5605	-1.18215	0.583026	0.0018582	0.0151031	48.5357	-0.0462015	0.155009	0.333761		52.0316	-0.550606	0.406695	0.0619527	0.149171	4.70067	0.116768	0.832007	0.771348	0.862502
ENSMUSG00000097754	Ptgs2os2	4.46449	-0.0586729	0.292336	0.25685		4.76305	-0.01167	0.153643	0.465034		6.30335	-0.0853265	0.481271	0.615076	0.768094
ENSMUSG00000006010	BC003331	257.808	0.118169	0.18045	0.407312	0.67831	245.107	0.0720055	0.138621	0.355237	0.661274	319.793	0.417456	0.178765	0.0123955	0.0400505	60.1272	-0.360535	0.449425	0.358705	0.532505
ENSMUSG00000006005	Tpr	15359.3	-0.493084	0.0804322	2.16356e-10	1.30336e-08	17277	0.0265455	0.0734694	0.683466	0.872782	16213.1	-0.708493	0.0778865	3.49324e-20	1.47783e-18	1369.47	-1.00674	0.395073	0.00500969	0.0242345
ENSMUSG00000006014	Prg4	133.587	-0.143122	0.231488	0.346821	0.623771	125.397	-0.0633073	0.152136	0.3308	0.640985	134.726	-0.520213	0.294818	0.0344515	0.0929924	24.8476	1.34499	0.802683	0.0216262	0.0739609
ENSMUSG00000066842	Hmcn1	29.3975	0.232971	0.363759	0.103634	0.300121	19.4361	0.00210789	0.150418	0.948559		29.1193	0.31822	0.441089	0.250982	0.428754	14.1551	-5.79518	1.52867	7.25042e-06	0.000118809
ENSMUSG00000093650	Gm20631	7.08479	-0.0612454	0.289243	0.36394		10.6985	0.0109787	0.152496	0.646435		7.59878	-0.22591	0.524732	0.255183	0.433614	1.86322	-0.217066	0.928944	0.429196
ENSMUSG00000097426	Gm8941	2.84355	0.0124162	0.284888	0.788782		3.18264	0.00671116	0.153451	0.619743		2.84604	0.0105331	0.488803	0.936365
ENSMUSG00000114212		46.1552	-0.0380816	0.282075	0.59337	0.811829	76.8938	0.029194	0.155652	0.267904	0.578814	42.7534	-0.883433	0.62965	0.0207647	0.0610918	7.01246	1.91965	1.70733	0.0200194	0.0696895
ENSMUSG00000114943		56.861	-0.0854087	0.297203	0.235433	0.501484	96.9961	0.091527	0.179582	0.114605	0.363223	56.2335	-1.73592	0.523488	6.65684e-05	0.000404225	25.8049	2.74666	1.02614	0.00067416	0.00499199
ENSMUSG00000114694		20.7783	-2.09924	0.870497	0.000648027	0.00643332	28.1606	-0.0392377	0.155945	0.30248		21.9941	-0.216245	0.567039	0.0565675	0.138645	5.12418	5.03794	3.07625	0.00167829	0.0103017
ENSMUSG00000114582		7.78145	-0.119339	0.315759	0.0986304		21.3377	0.0666264	0.171992	0.04849		7.37548	-2.06098	2.49397	0.00853059	0.0291617	6.42611	0.747286	1.05003	0.138127	0.278764
ENSMUSG00000114591		58.5563	-0.843048	0.706183	0.00912091	0.0530567	109.149	0.127683	0.216455	0.0516958	0.225245	62.4707	-1.42293	0.516117	0.000495355	0.00242984	5.95242	5.24726	3.1791	0.00159149	0.00989233
ENSMUSG00000100954	Gm10138	10.925	-0.0481397	0.281996	0.541948	0.78078	11.004	-0.00962386	0.152412	0.679996		11.5217	-0.205975	0.490185	0.355412	0.545947	3.80478	0.0572823	0.810053	0.891357	0.940091
ENSMUSG00000023150	Ivns1abp	989.48	-0.465778	0.124726	4.92848e-05	0.000762308	908.946	-0.558187	0.137169	3.55575e-06	0.000146845	1165.03	-0.316573	0.110796	0.00333379	0.0129707	461.23	-0.610657	0.290243	0.0261721	0.0848518
ENSMUSG00000052748	Swt1	4333.14	-0.565986	0.0898112	5.99145e-11	4.10498e-09	4463.35	-0.265182	0.0829669	0.000313514	0.00566189	4738.58	-0.653505	0.0841728	3.30667e-15	8.6945e-14	1506.72	-0.309497	0.333886	0.318737	0.492718
ENSMUSG00000053286	Trmt1l	199.098	0.23366	0.215124	0.140899	0.366484	168.983	0.0161882	0.132569	0.815162	0.932705	231.756	0.391877	0.214499	0.0436198	0.112704	105.756	-0.30127	0.353213	0.354114	0.528486
ENSMUSG00000103928	RP24-167M10.4	5.60289	0.00239113	0.28175	0.970526		5.07518	-0.000423378	0.152937	0.974944		6.06094	-0.00222769	0.4699	0.986889		6.63113	-0.241106	0.845624	0.557038	0.707248
ENSMUSG00000026484	Rnf2	6676.81	-0.420107	0.0798507	4.71683e-08	1.72519e-06	6458.29	-0.33536	0.0816804	6.34178e-06	0.000235521	7444.72	-0.435831	0.0742791	2.78484e-09	3.58544e-08	2651.91	0.228035	0.263126	0.368002	0.540684
ENSMUSG00000103238	RP24-395F2.1	80.3833	-0.0158586	0.229473	0.907018	0.966982	63.6442	-0.0877353	0.17611	0.130632	0.394693	73.0445	-0.528351	0.352123	0.0539723	0.133594	17.2231	-0.296804	0.67516	0.534431	0.688313
ENSMUSG00000100981	Gm29072	24.5574	-0.062337	0.270214	0.571321	0.798628	20.8338	-0.0335206	0.155616	0.298247		31.3442	0.022937	0.380448	0.928791	0.964085	7.75609	-6.53896	2.90938	7.15445e-05	0.000803887
ENSMUSG00000026483	Fam129a	65.6171	0.016213	0.23116	0.908793	0.967728	62.8771	0.00977872	0.144515	0.848347	0.945359	76.9721	0.11729	0.298066	0.628833	0.778434	27.7549	1.2899	0.716609	0.0193888	0.0680376
ENSMUSG00000043019	Edem3	362.739	-0.121294	0.157894	0.35933	0.63545	357.886	-0.0177818	0.121731	0.810916	0.930633	447.925	0.109182	0.151418	0.45037	0.637004	159.288	-0.0418315	0.320453	0.887604	0.93776
ENSMUSG00000032666	1700025G04Rik	465.495	0.00756657	0.142308	0.952512	0.98295	417.934	-0.0660949	0.125735	0.40725	0.707357	472.649	-0.25879	0.151787	0.0730421	0.169987	112.583	1.19326	0.435702	0.00232625	0.0132765
ENSMUSG00000100685	Gm28610	7.22419	-0.0183157	0.279866	0.7912		7.2319	-0.0018898	0.152542	0.92093		8.08718	-0.0372912	0.467149	0.836879	0.913056
ENSMUSG00000014980	Tsen15	19.1879	0.153425	0.321517	0.154993	0.388965	17.4799	0.039021	0.158051	0.197574		21.3265	0.462575	0.559595	0.121859	0.252197	176.251	-2.10307	0.650734	0.000158153	0.00152777
ENSMUSG00000032649	Colgalt2	729.133	-0.533436	0.142732	3.79241e-05	0.000612896	764.934	-0.116813	0.138438	0.179547	0.470907	762.316	-0.693012	0.306146	0.00717891	0.0251263	227.605	-0.233412	0.373048	0.492769	0.65432
ENSMUSG00000026482	Rgl1	103.415	0.192733	0.244375	0.227148	0.491695	94.0502	0.0496763	0.148437	0.419609	0.717733	120.049	0.374807	0.271547	0.105307	0.225451	30.4551	0.137771	0.476924	0.739636	0.840697
ENSMUSG00000086145	Gm15479	14.6304	0.0311599	0.273821	0.734503	0.888306	10.3085	-0.0149767	0.15298	0.529268		12.8317	-0.109706	0.445951	0.626355	0.776749	3.37216	0.455755	0.984708	0.246645	0.415116
ENSMUSG00000080950	Gm7278	10.2397	0.107934	0.305349	0.181513	0.428469	4.77098	-0.0051177	0.153137	0.741081		14.4829	0.705801	0.884774	0.0417901	0.108921	12.9774	0.336868	0.795838	0.474344	0.639332
ENSMUSG00000055547	Apobec4	11.6091	0.0109975	0.274744	0.898612	0.963083	10.0716	-0.00354232	0.152039	0.877084		15.8007	0.192682	0.45535	0.431009	0.618837
ENSMUSG00000008475	Arpc5	140.048	-0.0810574	0.200235	0.577841	0.802646	132.682	-0.0343133	0.138533	0.603281	0.832983	166.144	0.0200939	0.221235	0.920242	0.960646	336.429	-0.315909	0.445373	0.418246	0.589384
ENSMUSG00000026480	Ncf2	42.9359	0.918614	0.581969	0.00551783	0.0357887	26.7808	0.0250815	0.151877	0.502597		69.4162	1.88836	0.423922	7.01568e-07	6.26256e-06	6.6465	-0.0532713	0.707028	0.906591	0.948123
ENSMUSG00000042772	Smg7	2338.72	-0.24951	0.10663	0.01155	0.0633964	2321.66	-0.096118	0.0886608	0.188666	0.480241	2723.81	-0.144989	0.0896463	0.0994603	0.215585	354.201	-0.170543	0.332262	0.581164	0.727505
ENSMUSG00000100394	Gm28791	15.1832	0.147596	0.323118	0.138702	0.363089	9.1318	0.00389937	0.152282	0.862049		12.6116	0.137432	0.461263	0.536958	0.708762	16.7573	0.250173	0.609451	0.593517	0.736509
ENSMUSG00000042751	Nmnat2	324.18	-0.0258568	0.156156	0.842477	0.939668	300.128	-0.0378483	0.125255	0.617015	0.837925	330.058	-0.287215	0.172226	0.0750132	0.173288	30.2283	0.581403	0.607014	0.223877	0.388619
ENSMUSG00000099969	Gm28960	10.3804	-0.0842511	0.294198	0.286139	0.562166	9.8709	-0.0183293	0.154175	0.351145		17.4546	0.0525013	0.450425	0.805338	0.894523	3.08567	0.285775	0.970885	0.260749	0.430496
ENSMUSG00000026479	Lamc2	199.591	-0.0119035	0.179783	0.931051	0.975787	175.851	-0.0695504	0.144793	0.346585	0.653854	188.985	-0.477309	0.234057	0.0217429	0.0634205	20.058	0.372253	0.687924	0.444625	0.613426
ENSMUSG00000026478	Lamc1	1903.75	-0.146321	0.0947645	0.10024	0.294057	1789.01	-0.140199	0.095904	0.0719578	0.276179	2123.39	-0.162441	0.101068	0.100369	0.217146	135.41	1.78394	0.477909	3.72139e-05	0.000470445
ENSMUSG00000079138	Gm8818	2.68893	0.0129714	0.285254	0.768289							2.90919	0.0338747	0.488726	0.799686
ENSMUSG00000073538	E330020D12Rik	25.9377	0.13997	0.299625	0.24947	0.519513	18.4066	-0.0021236	0.150624	0.942017		19.457	-0.13583	0.425023	0.578019	0.741797	22.6315	0.265947	0.608857	0.572188	0.719867
ENSMUSG00000042708	Shcbp1l	114.393	-0.325132	0.282171	0.0712916	0.234399	102.072	-0.296983	0.445549	0.0191902	0.117515	125.985	-0.476169	0.276521	0.0430608	0.111564	20.6676	0.717904	0.637608	0.144003	0.286825
ENSMUSG00000103543	RP23-1K14.2	6.03494	0.133929	0.33152	0.0243935							19.0932	4.49269	1.17864	3.48685e-05	0.000224191
ENSMUSG00000042699	Dhx9	4672.88	0.143867	0.0929664	0.101669	0.296077	4573.03	0.18959	0.111204	0.028846	0.154353	6151.98	0.56653	0.0899839	1.54027e-10	2.37708e-09	510.343	-1.01649	0.5114	0.0198633	0.0693658
ENSMUSG00000042684	Npl	304.019	-0.10812	0.176434	0.440693	0.706692	300.286	-0.0116521	0.125884	0.871291	0.953991	440.563	0.388148	0.332761	0.138259	0.277705	1180.13	-5.74513	0.536445	4.78017e-28	4.0625e-25
ENSMUSG00000099858	Gm6652	5.95465	-0.017175	0.281622	0.783159		8.31938	0.0131143	0.153229	0.530105		8.20991	0.0439363	0.461973	0.822792	0.90485	3.64742	-0.395315	0.941705	0.312837	0.486655
ENSMUSG00000042671	Rgs8	8.43282	0.11499	0.313526	0.10541		3.92603	0.00259424	0.153259	0.849424		6.67545	0.18588	0.509178	0.327772	0.517409
ENSMUSG00000102404	RP23-184B11.5	22.5056	0.192535	0.346899	0.110897	0.313741	14.6956	0.00593127	0.151632	0.824355		18.6016	0.127677	0.431926	0.597195	0.754912	8.90489	-3.74633	1.66069	0.00173063	0.0105537
ENSMUSG00000100334	C230024C17Rik	16.6222	0.127718	0.314005	0.150221	0.381892	11.2115	0.0097536	0.152834	0.640966		13.7083	0.136295	0.468817	0.522016	0.697962	6.66112	0.0173586	0.83017	0.968084	0.982391
ENSMUSG00000026475	Rgs16	79.8535	0.0120802	0.22499	0.933585	0.976493	86.2752	0.0654967	0.15755	0.277481	0.589126	142.003	1.04969	0.286713	4.21455e-05	0.000267421	20.7619	0.18433	0.760221	0.691384	0.806993
ENSMUSG00000066800	Rnasel	6.31603	-0.0801053	0.297222	0.21229		6.02326	-0.020794	0.154924	0.237112		11.4815	0.0597433	0.449907	0.781066	0.880289	2.81574	0.257463	0.959554	0.299952	0.472668
ENSMUSG00000042641	Rgsl1	28.1914	-0.150931	0.302382	0.232325	0.497346	31.1372	-0.0121137	0.1492	0.752125		32.13	-0.328433	0.430822	0.236038	0.410081	5.825	0.230657	0.833569	0.586776	0.731543
ENSMUSG00000045968	Teddm2	284.304	-0.592554	0.218655	0.00109738	0.00987188	301.845	-0.103799	0.158869	0.197746	0.492192	346.001	-0.35373	0.210888	0.0638012	0.152709	6.40877	-0.755832	1.17762	0.105961	0.23204
ENSMUSG00000043282	Teddm1b	6.7586	0.0409917	0.284834	0.524223		3.44946	-0.00876588	0.153636	0.500585		6.86788	0.081327	0.475819	0.652896	0.794746	3.32649	-0.231525	0.845045	0.569703	0.717675
ENSMUSG00000026473	Glul	3197.97	-0.402883	0.0925931	4.70176e-06	0.000103258	3588.01	0.0717632	0.0828484	0.302398	0.614822	3985.83	-0.0769905	0.0839662	0.351862	0.542218	2837.41	0.0848525	0.339868	0.780659	0.868809
ENSMUSG00000100014	Gm29290	510.127	0.34585	0.160372	0.0118858	0.0646016	511.139	0.46276	0.163803	0.000385013	0.00666849	465.127	-0.144914	0.149162	0.307995	0.496247	79.7299	-2.5204	0.946407	0.000650663	0.00485437
ENSMUSG00000100627	A830008E24Rik	25.1421	0.0312567	0.264316	0.77626	0.908157	25.256	0.019437	0.151301	0.581437		20.0149	-0.373878	0.515852	0.177816	0.33367	33.2173	1.22696	0.712302	0.0249009	0.0817366
ENSMUSG00000004110	Cacna1e	32.2988	0.0242624	0.255187	0.842408	0.939668	26.3735	-0.0201133	0.151039	0.579475		31.9572	-0.116023	0.379098	0.648352	0.791802	14.8985	0.381632	0.748959	0.435632	0.604723
ENSMUSG00000096950	Gm9530	2.87569	0.0498846	0.291604	0.245449							2.91243	0.140268	0.517115	0.282294
ENSMUSG00000056708	Ier5	213.425	-0.0741586	0.196442	0.608451	0.821827	255.977	0.258135	0.252644	0.0304964	0.16086	288.098	0.343342	0.18717	0.0477705	0.121196	27.8621	1.28064	0.596749	0.00972729	0.040353
ENSMUSG00000026471	Mr1	7.02353	0.0658396	0.290449	0.340112		3.83688	-0.00245632	0.153107	0.867427		6.46356	0.10713	0.480059	0.565319	0.730848	6.94868	5.38762	3.32977	0.0016993	0.0104102
ENSMUSG00000026470	Stx6	545.309	0.0352936	0.134954	0.768418	0.903843	557.986	0.156421	0.139543	0.0918419	0.320765	617.325	0.0758186	0.138058	0.569217	0.734359	196.511	0.511555	0.421052	0.173972	0.325666
ENSMUSG00000104181	RP24-290D14.2	4.02842	0.0978145	0.311681	0.00861262
ENSMUSG00000033722	BC034090	97.7369	0.353607	0.302181	0.0597269	0.208309	79.6875	0.0333884	0.145964	0.553337	0.805319	109.263	0.481042	0.289032	0.0478692	0.121361	2.01786	-0.356809	1.02875	0.111516
ENSMUSG00000103670	RP23-320I7.3	2.20373	0.027124	0.288387	0.414989
ENSMUSG00000026469	Xpr1	3242.62	-0.18907	0.0927813	0.0306447	0.129657	3083.02	-0.157766	0.0868103	0.0314608	0.164482	3746.83	-0.102821	0.0880367	0.234917	0.408597	441.34	-0.349085	0.319618	0.243336	0.411435
ENSMUSG00000073535	Gm5532	14.6425	0.0636834	0.280437	0.496164	0.750285	13.384	0.01329	0.152425	0.608467		28.1668	1.24036	0.679662	0.00582398	0.0210893	23.9828	-1.72385	1.04911	0.01249	0.0487382
ENSMUSG00000033701	Acbd6	350.673	-0.0213962	0.156803	0.869535	0.950666	339.142	0.0129412	0.12164	0.864048	0.950703	355.992	-0.292145	0.180968	0.0825738	0.186805	110.182	0.451122	0.386486	0.200674	0.360112
ENSMUSG00000026468	Lhx4	7.44265	-0.0238531	0.280214	0.734067		4.96933	-0.0209759	0.155212	0.178059		7.06991	-0.169154	0.49741	0.381347	0.572244
ENSMUSG00000033684	Qsox1	195.591	0.0991994	0.19096	0.495977	0.75027	157.747	-0.0891458	0.15775	0.233959	0.539348	238.914	0.341785	0.221088	0.086121	0.193102	88.2647	-1.14463	0.468118	0.0055237	0.0260989
ENSMUSG00000033671	Cep350	3146.87	-0.108891	0.0858041	0.182488	0.429314	2945.56	-0.120591	0.0835181	0.0885957	0.312938	3558.47	-0.0810464	0.0835534	0.325145	0.514914	222.154	0.059937	0.319345	0.843931	0.908847
ENSMUSG00000102833	RP24-310B3.1	4.40972	-0.00756667	0.282757	0.889524		6.0103	0.010568	0.153281	0.5632		5.22967	-0.00251044	0.473223	0.985415		7.52397	0.141087	0.81513	0.737797	0.839419
ENSMUSG00000026466	Tor1aip1	264.717	0.0273315	0.165245	0.84145	0.939461	237.282	-0.0377803	0.131348	0.602688	0.832983	337.058	0.355273	0.174833	0.0299939	0.0826953	591.397	-1.44378	0.402621	9.25156e-05	0.000985207
ENSMUSG00000102964	RP24-321N12.1	17.6845	-0.0421699	0.272794	0.663859	0.852535	14.4183	-0.0287762	0.155284	0.291385		14.5798	-0.68224	0.814923	0.0463727	0.118312	8.36084	-1.86622	1.40891	0.0161343	0.0591593
ENSMUSG00000050565	Tor1aip2	577.897	0.011524	0.129345	0.92171	0.972599	530.974	-0.0337253	0.114917	0.664307	0.862621	748.388	0.391524	0.1285	0.00160169	0.00683992	864.842	0.00516841	0.304761	0.988359	0.993299
ENSMUSG00000015484	Fam163a	13.2227	-0.0155665	0.273653	0.856173	0.945344	11.2855	-0.0136718	0.15267	0.576787		13.4105	-0.128739	0.459161	0.553223	0.721213	8.16874	-0.458416	0.96965	0.252528	0.421338
ENSMUSG00000060985	Tdrd5	467.702	-0.230908	0.148684	0.0715694	0.235041	467.999	-0.052102	0.118059	0.508492	0.777705	503.168	-0.382191	0.147467	0.00655854	0.023288	45.4682	-0.025331	0.568662	0.95202	0.973365
ENSMUSG00000103705	CH36-500J15.2	4.63214	-0.00290173	0.28238	0.956224		4.01925	-0.00322409	0.153092	0.830758		4.35322	-0.0687454	0.486128	0.6494
ENSMUSG00000026602	Nphs2	6.69522	-0.0252765	0.281764	0.697788		3.88071	-0.0232225	0.15607	0.0610364		11.9908	0.222635	0.488937	0.340425	0.530075	9.48812	-0.914718	0.89558	0.103933	0.228753
ENSMUSG00000026601	Axdnd1	208.494	-0.0977489	0.18218	0.492037	0.74721	187.131	-0.105384	0.163101	0.18675	0.478673	271.964	0.24769	0.187323	0.153889	0.299877	100.321	-0.21389	0.377673	0.533819	0.687916
ENSMUSG00000078193	Gm2000	12.579	-0.0893995	0.292518	0.311258	0.589136	14.1785	-0.00858486	0.151733	0.74697		13.9312	-0.274162	0.504834	0.264501	0.44472	9.25783	-0.784697	0.831788	0.143997	0.286825
ENSMUSG00000026600	Soat1	734.388	-0.232301	0.129171	0.0438243	0.168346	740.769	-0.0427998	0.103913	0.580567	0.819978	761.317	-0.499884	0.132281	8.55445e-05	0.000505342	203.467	-0.988361	0.399248	0.00627896	0.0287458
ENSMUSG00000103199	RP24-228M19.3	13.6174	0.0365037	0.275394	0.686921	0.864024	16.7151	0.0345391	0.156711	0.236092		14.7965	0.0740439	0.431023	0.752083	0.862737	3.04813	0.857263	1.40514	0.0542736	0.144113
ENSMUSG00000101523	Csnk2a1	184.42	-0.337649	0.225811	0.0444651	0.169847	190.823	-0.0541982	0.137943	0.456423	0.744184	208.793	-0.370809	0.224246	0.0640872	0.153275	7.30229	0.016369	0.720259	0.974523	0.986073
ENSMUSG00000026596	Abl2	24656.9	-0.17155	0.0700986	0.0115047	0.0632548	23179.3	-0.17427	0.0749047	0.00825845	0.066062	27509.3	-0.181314	0.0700701	0.00880885	0.0300044	2173.3	-0.0808036	0.311691	0.779774	0.868289
ENSMUSG00000104293	RP23-363M8.2	14.5153	-0.0268627	0.273362	0.764949	0.901974	14.8902	-0.000556707	0.151601	0.979667		21.6886	0.204894	0.437717	0.421897	0.610877
ENSMUSG00000060519	Tor3a	274.024	-0.176711	0.173843	0.209223	0.466811	244.015	-0.209801	0.221116	0.0490487	0.218533	311.139	-0.177441	0.180708	0.291157	0.476195	88.191	-1.41556	0.475473	0.000803445	0.00572704
ENSMUSG00000033557	Fam20b	278.432	0.0807757	0.170987	0.560203	0.792768	247.733	-0.0173502	0.126128	0.810676	0.930451	353.037	0.414708	0.186229	0.0165621	0.0507744	169.163	-0.628145	0.409813	0.0870084	0.201961
ENSMUSG00000026594	Ralgps2	10543.6	-0.196408	0.0738592	0.00578495	0.0370932	10490.9	-0.0452712	0.0693952	0.465289	0.748342	12162.2	-0.10802	0.072294	0.130863	0.266396	2029.11	0.61814	0.275561	0.0187683	0.0662891
ENSMUSG00000101964	Gm28693	9.50221	-0.016782	0.277794	0.823398	0.930582	10.0269	0.0016207	0.15234	0.942033		11.3601	-0.0147077	0.44351	0.942235	0.969476	3.49776	0.597954	1.07959	0.140148	0.281636
ENSMUSG00000033544	Angptl1	16.3311	-0.0167819	0.271303	0.854567	0.944286	16.3248	-2.4548e-05	0.150909	0.996892		17.025	-0.111702	0.433824	0.634585	0.782791	5.06602	0.125221	0.849649	0.742558	0.842452
ENSMUSG00000103303	RP24-444I15.1	18.5434	0.299554	0.533353	0.0159364	0.0804536	9.49106	0.018277	0.153807	0.4129		10.7455	0.145021	0.479037	0.480942	0.663121	2.7041	0.504107	0.995899	0.226132
ENSMUSG00000101905	4930439D14Rik	7.53433	-0.0162445	0.281163	0.798291		9.92049	0.0124943	0.153009	0.569027		10.5465	0.0513393	0.467881	0.784359	0.882444
ENSMUSG00000101768	Gm28694	11.6405	-0.0745397	0.28772	0.378867	0.653111	13.5761	-0.00247048	0.15145	0.924124		14.5297	-0.112965	0.442443	0.620316	0.772155	11.7937	0.688032	1.14493	0.119134	0.251802
ENSMUSG00000103325	RP24-329K22.1	3.66617	-0.023771	0.284901	0.642826		3.64417	-0.00464585	0.153252	0.741885		3.16951	-0.159573	0.523219	0.244095
ENSMUSG00000026592	Tex35	49.1582	0.0436539	0.247417	0.740146	0.890757	40.8738	-0.0189594	0.148972	0.652003		43.8915	-0.307189	0.392327	0.258983	0.438015	14.672	1.12683	1.20586	0.0640627	0.162631
ENSMUSG00000070565	Rasal2	805.819	-0.248198	0.136854	0.0397566	0.156723	752.354	-0.24742	0.139541	0.0147195	0.0978028	855.303	-0.441162	0.125271	0.000265476	0.00139743	44.0592	-1.13899	0.571469	0.0161146	0.0591285
ENSMUSG00000087632	Gm6058	6.02362	0.0102124	0.282215	0.865504		4.4938	-0.00513512	0.153204	0.730107		4.39361	-0.126951	0.502254	0.412971
ENSMUSG00000103808	RP24-227F14.1	11.799	-0.0524374	0.280826	0.534595	0.77657	9.19345	-0.0277017	0.156026	0.199122		9.13	-0.876845	1.50903	0.0197621	0.0586765	4.79422	-0.4245	0.890867	0.337758	0.512295
ENSMUSG00000049881	2810025M15Rik	308.572	-0.0258611	0.157688	0.843461	0.939906	278.303	-0.0702576	0.134506	0.371094	0.675219	345.709	-0.0251196	0.167349	0.872312	0.934251	116.683	0.21329	0.369239	0.530744	0.685691
ENSMUSG00000033488	BC026585	52.6162	0.107889	0.258051	0.439287	0.705367	49.3025	0.0327568	0.149926	0.49914		55.8545	0.107864	0.329939	0.669606	0.806279	49.7404	-3.43318	0.811284	1.81834e-06	3.72372e-05
ENSMUSG00000087093	Gm15486	50.1113	0.00601802	0.246458	0.964717	0.986808	50.8875	0.0234179	0.148245	0.617608		52.997	-0.067993	0.334295	0.78542	0.883272	7.23745	0.755206	1.01195	0.145966	0.2895
ENSMUSG00000026589	Sec16b	581.075	0.0675877	0.129805	0.560449	0.792991	568.055	0.0999225	0.120208	0.233525	0.538767	598.022	-0.143942	0.134931	0.267402	0.44754	159.352	1.40913	0.410024	0.000176762	0.00167084
ENSMUSG00000004031	Brinp2	18.4937	-0.00665132	0.267197	0.944658	0.980711	16.4341	-0.00863148	0.151203	0.766922		23.7842	0.134552	0.40805	0.596153	0.753963	4.79395	0.303302	0.835808	0.487918	0.650406
ENSMUSG00000026587	Astn1	89.2794	-0.118074	0.232459	0.428039	0.69576	89.063	-0.0163073	0.141321	0.776011	0.918147	87.7629	-0.547985	0.323879	0.0368221	0.0982571	16.3684	0.598606	0.708338	0.235719	0.403039
ENSMUSG00000073530	Pappa2	33.9035	0.0264385	0.258118	0.823088	0.930493	36.4861	0.0392793	0.154426	0.357864		39.5997	0.143546	0.367637	0.580582	0.74333	10.6837	0.743732	0.866699	0.168452	0.318721
ENSMUSG00000104014	RP23-375F6.1	28.265	-0.0127525	0.267964	0.894859	0.961225	25.3707	-0.0109678	0.150512	0.741291		25.8749	-0.320938	0.466115	0.240782	0.415724	45.6914	-4.70568	0.805172	5.95396e-10	3.10953e-08
ENSMUSG00000040782	Rfwd2	18829.5	0.0625316	0.0701222	0.358703	0.634918	18117.5	0.095752	0.066468	0.109345	0.354712	20722.5	0.02272	0.065463	0.725217	0.844662	1991.86	0.331001	0.42481	0.383417	0.555287
ENSMUSG00000103572	RP23-375F6.4	24.2343	-0.104993	0.284396	0.356383	0.632283	18.9393	-0.0538308	0.164948	0.0756115		25.901	-0.320187	0.471901	0.237327	0.411833	9.68484	-2.86041	1.54986	0.0038741	0.0198558
ENSMUSG00000015829	Tnr	5.31753	0.00163437	0.282403	0.979706		4.20178	-0.00475095	0.153146	0.756212		4.5909	-0.0800044	0.48612	0.615578
ENSMUSG00000090394	4930523C07Rik	9.84848	-0.117647	0.313124	0.118862	0.328058	7.23649	-0.0469157	0.164118	0.0076505		11.1386	-0.429791	0.638221	0.10429	0.22368	2.83769	0.429354	0.980692	0.236749	0.404177
ENSMUSG00000026725	Tnn	407.484	-0.157602	0.152339	0.223467	0.486869	404.183	-0.0253414	0.117218	0.740203	0.902269	417.335	-0.455765	0.163212	0.00306032	0.0120468	16.6974	0.593254	0.854402	0.245628	0.413827
ENSMUSG00000058267	Mrps14	1015.81	-0.180659	0.12284	0.102681	0.298337	1069.09	0.0635537	0.102418	0.416434	0.714468	1021.15	-0.541907	0.127124	1.00301e-05	7.20291e-05	977.659	0.49998	0.426271	0.190272	0.347562
ENSMUSG00000014226	Cacybp	423.087	-0.00598146	0.14775	0.960982	0.985992	453.057	0.214575	0.160388	0.0382246	0.18651	599.935	0.591949	0.141307	1.28949e-05	9.07149e-05	1004.33	0.786323	0.384904	0.0252939	0.0826583
ENSMUSG00000103006	RP23-71J17.5	77.0853	-0.00740014	0.229307	0.957262	0.984847	84.0077	0.0603985	0.15476	0.317311	0.629048	90.9162	0.0736256	0.28827	0.757774	0.866255	37.3348	-0.305767	0.626132	0.515317	0.672499
ENSMUSG00000026721	Rabgap1l	1627.51	-0.256602	0.105801	0.00891296	0.052172	1605.97	-0.110778	0.093852	0.144859	0.417654	1798.42	-0.307678	0.0989768	0.00147754	0.00637287	243.189	0.625669	0.350629	0.0540002	0.143599
ENSMUSG00000118401		3.36648	-0.016144	0.284433	0.744206
ENSMUSG00000104053	RP24-400M20.1	3.36863	-0.000612703	0.287596	0.967464		4.46947	0.00638462	0.153377	0.648661		4.27892	0.0202049	0.484567	0.888941		2.46473	-0.017879	0.861235	0.955201
ENSMUSG00000040423	Rc3h1	6081.36	-0.156522	0.0777716	0.0360478	0.146196	5552.17	-0.246999	0.0847536	0.000888256	0.012483	6617.01	-0.24483	0.0731182	0.000705129	0.00331024	801.198	0.463953	0.287742	0.089862	0.206466
ENSMUSG00000103343	RP24-188H2.3	11.2004	0.0415557	0.279567	0.614157	0.824385	9.09302	0.00101619	0.152114	0.966891		11.3489	0.0514337	0.449887	0.81073	0.897305
ENSMUSG00000103846	RP24-188H2.4	3.72786	-0.0404927	0.288257	0.40206		3.28534	-0.0124702	0.154044	0.336086		5.50133	-0.0316572	0.472311	0.852094
ENSMUSG00000103739	RP24-188H2.5	11.6787	0.0457454	0.279748	0.584898	0.806758	6.58696	-0.0179319	0.154201	0.343533		10.9349	0.0195046	0.447917	0.928977	0.964137
ENSMUSG00000026715	Serpinc1	683.577	0.0617004	0.137112	0.610264	0.822525	684.975	0.157079	0.1278	0.0820348	0.299404	751.407	0.0310569	0.133666	0.810622	0.897305	280.753	0.401796	0.320491	0.182317	0.337152
ENSMUSG00000103222	RP24-188H2.6	5.15246	0.0319571	0.284462	0.591176		5.1997	0.0106244	0.153454	0.527649		5.26695	0.0644158	0.482798	0.691938
ENSMUSG00000103680	RP24-297J20.4	2.91479	-0.0357171	0.288213	0.410189		3.249	-0.00546605	0.153372	0.683316		5.46898	0.0442093	0.47471	0.798414
ENSMUSG00000043467	Zbtb37	2307.55	-0.0664603	0.0948933	0.456992	0.720304	2198	-0.0393991	0.0819506	0.57088	0.813977	2561.99	-0.0898988	0.0897975	0.308299	0.496516	390.516	-0.0140732	0.288267	0.956796	0.975941
ENSMUSG00000053332	Gas5	498.361	0.139412	0.141191	0.25851	0.530094	486.465	0.136954	0.144063	0.131171	0.395414	601.857	0.357224	0.145023	0.0099812	0.0333499	985.025	0.140832	0.35678	0.670144	0.791365
ENSMUSG00000026709	Dars2	141.677	0.0976448	0.206177	0.5096	0.759599	129.252	0.0178518	0.139165	0.775362	0.917737	163.534	0.226724	0.227871	0.265626	0.445785	102.159	-0.697104	0.548446	0.12084	0.254148
ENSMUSG00000026708	Cenpl	218.27	-0.0196996	0.190681	0.889266	0.959218	227.011	0.0746626	0.142111	0.334814	0.643455	255.804	0.0766595	0.191205	0.666355	0.803982	395.592	0.379922	0.31856	0.204502	0.365193
ENSMUSG00000026705	Klhl20	178.585	-0.170672	0.204611	0.259327	0.530933	168.248	-0.0847233	0.154129	0.257424	0.56728	187.123	-0.419893	0.230039	0.0402602	0.10577	34.9621	-1.11644	0.61354	0.023985	0.0795966
ENSMUSG00000044835	Ankrd45	17.8388	0.0766268	0.280323	0.454076	0.718093	11.468	-0.0154833	0.152863	0.534849		14.9097	-0.0643545	0.431352	0.777861	0.877967	7.30944	0.159077	0.848472	0.683672	0.80172
ENSMUSG00000102817	RP23-16I21.1	12.0478	0.158766	0.336255	0.0895541	0.272443	8.39185	0.0167675	0.153773	0.418627		14.1951	0.613348	0.780001	0.0571908	0.139873	10.2968	0.612067	1.01667	0.18796	0.344537
ENSMUSG00000026701	Prdx6	245.478	0.177698	0.190993	0.229903	0.494249	222.688	0.0500454	0.135623	0.495324	0.76868	279.647	0.287706	0.187531	0.098153	0.213476	694.846	0.918928	0.362482	0.00581329	0.0272064
ENSMUSG00000040323	Gm15429	17.6103	0.0388317	0.271378	0.697178	0.86954	13.3797	-0.0107019	0.151935	0.687335		16.462	-0.0620599	0.423736	0.789983	0.885514	3.9037	-0.0378842	0.832458	0.918621	0.955307
ENSMUSG00000102399	RP24-75E15.1	296.453	0.657985	0.197052	0.000116462	0.00154895	337.832	1.08703	0.189787	5.50006e-10	8.92592e-08	297.003	0.295605	0.359581	0.267877	0.448111	31.0535	-1.34383	0.744264	0.0175546	0.0629133
ENSMUSG00000040297	Suco	3908.5	-0.381217	0.0858857	3.45196e-06	7.84491e-05	3777.91	-0.293133	0.093565	0.000317438	0.00571533	4288.23	-0.454297	0.0802921	9.49597e-09	1.13706e-07	531.492	0.889006	0.344562	0.00552121	0.0260989
ENSMUSG00000103158	RP24-75E15.3	101.461	-0.166512	0.236799	0.283961	0.559685	105.595	-0.0071427	0.138685	0.903951	0.963436	97.938	-0.697902	0.328027	0.00991012	0.0331634	45.0899	2.17046	0.999247	0.00313405	0.0167901
ENSMUSG00000086277	4930558K02Rik	4.68429	0.00698755	0.28336	0.89659		3.97272	-0.000384312	0.153114	0.976396		3.05144	-0.117846	0.509502	0.358439		7.02614	0.905534	1.7457	0.00664564	0.0300856
ENSMUSG00000026698	Pigc	384.463	-0.211105	0.164531	0.122603	0.333791	332.53	-0.44315	0.207842	0.00238057	0.0264565	383.686	-0.619111	0.180891	0.000251132	0.00132997	66.1994	0.641423	0.569091	0.166079	0.315517
ENSMUSG00000040265	Dnm3	247.055	-0.170518	0.184698	0.239399	0.507476	228.37	-0.12075	0.165613	0.155431	0.432962	245.694	-0.581488	0.204784	0.0019619	0.00818526	68.1492	1.39896	0.438476	0.00043454	0.00347651
ENSMUSG00000090260	2810442N19Rik	2.98294	0.0198585	0.285765	0.655983
ENSMUSG00000078190	Dnm3os	19.1154	0.17784	0.344675	0.0973784	0.288576	8.22894	-0.01493	0.153375	0.483641		12.9917	0.0402859	0.437638	0.858513	0.926148
ENSMUSG00000026694	Mettl13	140.285	0.906801	0.285719	0.000123471	0.00162221	86.2084	-0.0030131	0.142094	0.953846	0.984107	229.417	1.75094	0.228581	1.76365e-15	4.76405e-14	88.6084	-1.26943	0.519463	0.00448904	0.0222867
ENSMUSG00000026696	Vamp4	1072.6	-0.161079	0.115025	0.125423	0.338829	1084.54	0.00506621	0.0948109	0.946927	0.981124	1213.95	-0.144197	0.108042	0.17107	0.324289	269	0.857989	0.345461	0.00747744	0.0329342
ENSMUSG00000091743	Gm5705	148.049	-0.265607	0.236757	0.108982	0.31015	153.753	-0.0318299	0.135577	0.640535	0.849387	159.263	-0.470045	0.246033	0.029508	0.0815934	8.07227	0.695383	1.08889	0.143739	0.286543
ENSMUSG00000026697	Myoc	21.7023	0.407833	0.775389	0.0158274	0.0801169	14.1232	0.0341201	0.156987	0.209087		20.5421	0.826039	0.7481	0.0323884	0.0882786	1.91459	-0.207317	0.897812	0.533379
ENSMUSG00000091060	7420461P10Rik	287.282	0.082458	0.167946	0.548053	0.785179	250.703	-0.0381712	0.129147	0.606151	0.833417	286.619	-0.184864	0.188834	0.289815	0.474693	165.059	1.8974	0.551376	9.91221e-05	0.00103772
ENSMUSG00000040225	Prrc2c	16211.5	-0.264114	0.0824142	0.000805932	0.00767964	16418.1	-0.0581134	0.0684832	0.341962	0.650903	19413	-0.0651477	0.0692585	0.34166	0.531562	1568.35	-0.496476	0.276722	0.0590846	0.15403
ENSMUSG00000026692	Fmo4	540.81	-0.142205	0.136516	0.236017	0.502343	544.071	0.00354924	0.107206	0.964352	0.987704	535.443	-0.548497	0.150825	0.000134823	0.000760304	42.1994	0.550413	0.564078	0.230499	0.39698
ENSMUSG00000040181	Fmo1	14.2031	0.0156557	0.272529	0.863458	0.949113	11.3568	-0.00872457	0.152282	0.710819		18.3945	0.176053	0.442869	0.4746	0.6583
ENSMUSG00000040170	Fmo2	13.7087	0.147698	0.32416	0.130904	0.349688	12.0998	0.0321023	0.156647	0.209889		7.89793	-0.0612164	0.4632	0.751432	0.862443
ENSMUSG00000095576	Fmo6	50.5426	-0.119412	0.265838	0.384811	0.658082	49.9107	-0.0256992	0.148245	0.589125		44.7287	-1.02178	0.496132	0.00531169	0.0194875	13.3432	1.03633	0.927949	0.0779668	0.186534
ENSMUSG00000026691	Fmo3	136.539	0.0700511	0.201019	0.632357	0.83461	131.506	0.0419359	0.140565	0.531763	0.792228	126.847	-0.352781	0.270648	0.124296	0.255804	4.61902	4.21554	3.68431	0.00520369	0.024947
ENSMUSG00000026586	Prrx1	35.526	-0.124519	0.280814	0.333619	0.61097	32.9545	-0.0393624	0.155638	0.313211		31.5577	-1.07779	0.643736	0.00919498	0.0311295	5.73444	2.26779	2.12029	0.015969	0.0587277
ENSMUSG00000040124	Gorab	59.2174	0.0708159	0.244742	0.607236	0.820927	45.6143	-0.0376878	0.152649	0.406929		59.6373	-0.0405545	0.32362	0.868407	0.931799	28.5611	0.422929	0.627465	0.374741	0.546744
ENSMUSG00000101869	Gm29500	3.25312	-0.0489061	0.290917	0.281933		2.91027	-0.012581	0.154222	0.258862		3.30851	-0.197917	0.546022	0.138202
ENSMUSG00000026585	Kifap3	49.013	-0.00687738	0.247745	0.954358	0.983366	49.7433	0.0160241	0.146855	0.733863		46.6308	-0.33663	0.385994	0.218383	0.387522	21.4718	0.368068	0.594713	0.431446	0.601182
ENSMUSG00000026584	Scyl3	155.216	-0.081886	0.197291	0.571328	0.798628	154.768	0.00336443	0.132335	0.960844	0.986577	174.304	-0.105117	0.219086	0.592674	0.751425	107.256	0.0345038	0.391336	0.925143	0.958078
ENSMUSG00000041406	BC055324	270.143	0.0574361	0.166264	0.674506	0.857741	261.457	0.0538983	0.130179	0.483435	0.759824	352.982	0.450935	0.17401	0.00570153	0.0207116	131.83	-1.76685	0.372472	4.32055e-07	1.07279e-05
ENSMUSG00000041396	Mettl18	73.2928	0.118098	0.249326	0.417337	0.687186	66.8055	0.0294878	0.146928	0.576466	0.817598	78.5523	0.143697	0.295559	0.547603	0.716969	19.3182	-0.874734	0.680898	0.0883473	0.204245
ENSMUSG00000026582	Sele	12.9555	0.0616829	0.283424	0.47133	0.730861	8.4887	-0.00780025	0.152611	0.71046		14.1917	0.17048	0.457765	0.471249	0.655626
ENSMUSG00000026581	Sell	2.94	-0.0355279	0.288152	0.412142		3.0035	-0.00647223	0.153555	0.588452		7.13637	0.162063	0.498064	0.391866	0.582561
ENSMUSG00000026580	Selp	219.002	-0.228053	0.198257	0.132314	0.35215	210.738	-0.0971704	0.152514	0.227288	0.5311	209.493	-0.823494	0.223685	6.00677e-05	0.000369497	98.6587	1.45895	0.432639	0.000212828	0.00193543
ENSMUSG00000090081	Gm16587	3.87896	-0.012206	0.283753	0.812656		2.90035	-0.00828632	0.153717	0.475659		3.58348	-0.0999487	0.496876	0.493931
ENSMUSG00000086593	Gm16548	18.1984	0.0763589	0.280231	0.454686	0.718648	11.8348	-0.014926	0.152688	0.556888		14.2288	-0.136098	0.445899	0.557173	0.72449
ENSMUSG00000026579	F5	167.873	-0.230638	0.220568	0.147504	0.37745	174.731	-0.0196833	0.131842	0.774055	0.917573	190.672	-0.267559	0.21793	0.171798	0.325174	2.03618	0.117136	0.855659	0.746479
ENSMUSG00000040918	Slc19a2	196.297	-0.0549894	0.182765	0.696989	0.869425	161.147	-0.239724	0.284205	0.0339474	0.171796	246.635	0.20201	0.193262	0.257718	0.436527	66.077	0.927312	0.465547	0.023123	0.0776735
ENSMUSG00000026578	Ccdc181	973.574	-0.0348499	0.117568	0.744257	0.892302	880.254	-0.112541	0.115132	0.178209	0.469292	974.315	-0.3687	0.125184	0.00227786	0.00931579	105.195	1.06826	0.480861	0.0109637	0.0443602
ENSMUSG00000026577	Blzf1	546.534	-0.178884	0.151145	0.1647	0.403569	517.276	-0.117167	0.136639	0.178839	0.470197	546.352	-0.566556	0.158616	0.000164248	0.000905803	101.443	-0.777481	0.345556	0.0150677	0.0561756
ENSMUSG00000026575	Nme7	345.951	-0.139764	0.170871	0.313099	0.590784	350.664	0.00561975	0.116654	0.942398	0.97935	342.264	-0.551077	0.17623	0.000846723	0.00389672	162.413	0.63301	0.49257	0.133001	0.271861
ENSMUSG00000026576	Atp1b1	512.924	-0.098045	0.138435	0.418536	0.688254	440.502	-0.325012	0.175939	0.00732972	0.0609545	528.293	-0.362526	0.144549	0.00859985	0.0293662	308.399	1.18963	0.33362	0.000143926	0.00142456
ENSMUSG00000104011	RP24-272N10.3	3.19186	0.0459734	0.290021	0.32218
ENSMUSG00000104117	RP23-152I6.3	3.11153	0.0424027	0.289729	0.330457
ENSMUSG00000102408	RP23-187M7.3	7.21373	-0.0187343	0.281967	0.760756		5.48008	-0.0157613	0.154155	0.335133		7.47592	-0.113435	0.480186	0.540412	0.711293
ENSMUSG00000026572	Tbx19	463.474	-0.220833	0.148119	0.0836291	0.260402	435.474	-0.17303	0.15347	0.073629	0.279668	474.311	-0.538001	0.154875	0.000253976	0.00134274	470.87	0.763921	0.42768	0.0455	0.126632
ENSMUSG00000040848	Sft2d2	76.3576	0.200186	0.268258	0.210707	0.46937	60.2341	-0.00556354	0.144084	0.910654	0.96647	74.6162	0.0610356	0.293	0.800458	0.892098	20.081	0.151423	0.623299	0.748215	0.846455
ENSMUSG00000040843	Tiprl	764.902	0.18912	0.138285	0.120021	0.33018	757.5	0.253356	0.147327	0.0156271	0.101955	1035.85	0.682894	0.127306	3.16649e-08	3.50945e-07	1746.61	-0.625185	0.363135	0.0625727	0.16
ENSMUSG00000102302	RP23-187M7.5	95.9427	0.0668663	0.222719	0.645817	0.842824	85.1027	-0.00620528	0.141082	0.910007	0.966219	92.1278	-0.222069	0.292131	0.352854	0.543131	19.7571	0.207867	0.710091	0.664338	0.787319
ENSMUSG00000040836	Gpr161	1271.49	0.238911	0.120384	0.0288794	0.124212	1019.39	-0.130296	0.116296	0.125522	0.385048	1641.38	0.615767	0.11067	1.18436e-08	1.4012e-07	216.83	-3.60059	0.38115	2.81678e-22	1.17034e-19
ENSMUSG00000026571	Dcaf6	1764.65	-0.101268	0.0982104	0.271245	0.546138	1718.44	-0.0178083	0.0901353	0.806512	0.929179	1946.01	-0.148216	0.0976305	0.12117	0.251129	198.588	1.0917	0.347652	0.000746137	0.00541558
ENSMUSG00000102401	RP24-323I23.1	14.6495	0.121161	0.306095	0.204995	0.460728	12.9834	0.0263525	0.154919	0.309067		11.9924	0.0635551	0.451287	0.764516	0.870433	1.95665	0.0365359	0.863819	0.915914
ENSMUSG00000026568	Mpc2	521.085	-0.177552	0.146212	0.159718	0.396077	584.921	0.158538	0.140126	0.0885384	0.312828	574.084	-0.25558	0.141611	0.0590596	0.143572	792.539	0.123369	0.357323	0.705103	0.815848
ENSMUSG00000103763	RP24-323I23.2	9.50177	-0.0787561	0.29388	0.284082	0.55982	9.20772	-0.0212919	0.154582	0.305756		9.64273	-0.446386	0.683681	0.0806905	0.183497
ENSMUSG00000026567	Adcy10	28.6487	0.146093	0.299712	0.247033	0.516191	19.0653	-0.011542	0.151061	0.710943		38.7862	0.730211	0.518077	0.0333175	0.0904481	4.73038	0.0999841	0.840886	0.795765	0.877938
ENSMUSG00000026566	Mpzl1	592.637	0.0726328	0.129059	0.529676	0.773301	584.065	0.107945	0.129735	0.208234	0.505065	700.225	0.2264	0.129585	0.0701873	0.164801	582.028	1.33939	0.312143	5.96227e-06	0.00010162
ENSMUSG00000103098	RP23-469D21.5	8.98629	0.0646243	0.287718	0.394787	0.667363	6.56732	0.0040451	0.15267	0.835742		7.45329	0.0280413	0.46281	0.884935	0.940789
ENSMUSG00000040723	Rcsd1	55.303	0.00403973	0.237674	0.978114	0.991763	50.195	-0.0128685	0.146098	0.784643		65.1738	0.0930879	0.310239	0.706662	0.830765	11.2688	0.148511	0.642679	0.754241	0.851344
ENSMUSG00000040713	Creg1	74.5052	-1.39461	0.418295	4.74477e-05	0.000738	116.245	0.0486214	0.146841	0.441045	0.733323	82.19	-1.51727	0.389151	9.65536e-06	6.9614e-05	112.512	0.428926	0.478861	0.298443	0.471117
ENSMUSG00000005763	Cd247	17.4888	0.0833191	0.286564	0.380995	0.654489	13.2624	0.00454435	0.151605	0.865395		19.1936	0.230639	0.465104	0.358532	0.5493	2.18828	0.0917713	0.865565	0.792316
ENSMUSG00000094394	Gm23402	42.1722	-0.323013	0.425288	0.0629002	0.21544	36.4927	-0.117996	0.219343	0.0156821		55.5157	-0.0726543	0.451102	0.72888	0.84734
ENSMUSG00000026565	Pou2f1	1165.12	-0.314957	0.115047	0.00287911	0.0212929	1135.71	-0.193311	0.113217	0.0274616	0.149148	1221.32	-0.551586	0.121329	2.65669e-06	2.14041e-05	102.513	1.08742	0.417677	0.00397879	0.0202701
ENSMUSG00000099008	Gm17976	4.30462	0.0320844	0.285375	0.562263							2.85097	-0.0439273	0.489615	0.74079
ENSMUSG00000026564	Dusp27	9.57831	-0.0192017	0.278178	0.796647	0.918145	6.46938	-0.0216813	0.155143	0.211378		11.1434	-0.0216595	0.443239	0.917165	0.958804
ENSMUSG00000000544	Gpa33	62.8155	0.102595	0.249148	0.472155	0.731363	57.1653	0.020126	0.146379	0.68549	0.873883	59.4381	-0.112871	0.320275	0.649337	0.792409	26.1985	0.446956	0.539862	0.315821	0.489708
ENSMUSG00000040629	Mael	1496.07	0.0692677	0.102776	0.470885	0.730543	1435.12	0.0821957	0.0943212	0.278315	0.589733	1719.13	0.151134	0.0988034	0.11898	0.247486	597.674	0.637575	0.330009	0.038534	0.112503
ENSMUSG00000040612	Ildr2	9.31932	-0.0262503	0.279497	0.722391	0.881719	14.7169	0.0312621	0.155929	0.262018		12.8527	0.0581721	0.440468	0.796386	0.889304	5.46731	2.42233	1.96941	0.0139943	0.0531164
ENSMUSG00000103400	RP24-229G16.1	25.8013	-0.169934	0.320275	0.173255	0.41737	22.9553	-0.0611102	0.167635	0.0868752		34.1595	-0.132559	0.375079	0.604309	0.760369	2.76339	0.0330408	0.822826	0.935879
ENSMUSG00000026563	Tada1	247.538	-0.524717	0.225259	0.0035725	0.0252135	244.275	-0.304559	0.236947	0.0181358	0.112666	303.776	-0.290865	0.194728	0.103795	0.222851	111.078	-0.438858	0.421574	0.241532	0.409474
ENSMUSG00000040596	Pogk	218.413	0.0372974	0.178458	0.791637	0.916013	190.254	-0.0539012	0.138677	0.454504	0.743203	263.984	0.240811	0.193763	0.177624	0.333399	17.4537	-0.28595	0.59886	0.53624	0.690082
ENSMUSG00000104194	RP24-229G16.2	30.4579	-0.0854925	0.271051	0.472586	0.731725	30.2025	-0.0154891	0.149744	0.683611		33.0065	-0.249391	0.407596	0.348854	0.539073	2.065	0.325675	1.01048	0.14069
ENSMUSG00000086056	Gm4846	24.3424	0.0119575	0.261542	0.916293	0.970668	21.3215	-0.00762721	0.150445	0.811953		27.0717	0.018854	0.386308	0.945087	0.970895	6.93691	0.297381	0.831211	0.501504	0.661583
ENSMUSG00000096172	Gm22992	37.4454	-1.09658	0.627547	0.00328224	0.0236074	54.2141	0.00965686	0.146021	0.839124	0.941303	44.1775	-0.944419	0.502251	0.00868041	0.0295948	1.99287	-0.375518	1.01229	0.177676
ENSMUSG00000051081	Gm4847	16.2886	-0.000772016	0.27002	0.990796	0.996583	24.1851	0.0573677	0.165556	0.102571		16.6837	-0.0828909	0.42845	0.721304	0.841953	22.4769	-4.30588	1.29708	6.30213e-05	0.000724667
ENSMUSG00000103073	RP24-72P6.1	18.5333	-0.0126266	0.26799	0.896379	0.961932	12.3206	-0.0394593	0.15931	0.117935		16.3487	-0.302945	0.505008	0.238398	0.413261
ENSMUSG00000086925	Gm6286	6.04495	0.0268188	0.28243	0.679257		6.07893	0.00905603	0.15315	0.617529		6.73522	0.0787133	0.471442	0.67651	0.811267
ENSMUSG00000060568	Fam78b	51.5223	0.112379	0.258239	0.424031	0.692529	36.5847	-0.0404303	0.154851	0.341897		55.1299	0.132512	0.333394	0.602303	0.758856
ENSMUSG00000103333	RP23-79H24.1	2.89126	0.0460884	0.291344	0.241187							3.97807	0.227816	0.560746	0.126216
ENSMUSG00000026558	Uck2	2826.96	-0.0995578	0.092368	0.254013	0.525176	2838.7	0.0407805	0.0914172	0.581616	0.820682	3412.15	0.107141	0.0889123	0.220773	0.390562	1407.3	-0.447926	0.336534	0.150735	0.295666
ENSMUSG00000103139	RP23-79H24.3	14.9813	0.210502	0.381389	0.0541135	0.194735	7.92787	0.00614519	0.152593	0.767865		6.72226	-0.104586	0.477465	0.575889	0.739894	3.26338	-0.0349748	0.841546	0.92256	0.956742
ENSMUSG00000052428	Tmco1	918.806	0.12201	0.117409	0.252681	0.523775	980.224	0.399451	0.124827	0.000150382	0.00317571	1133.47	0.389406	0.110308	0.000291915	0.00151822	701.998	-0.810943	0.337506	0.00968714	0.0402132
ENSMUSG00000088246	Gm25911	17381.2	0.132215	0.171292	0.348987	0.625572	17082.8	0.0558748	0.153859	0.431106	0.725676	16670.9	-0.212157	0.24788	0.343172	0.53319
ENSMUSG00000095752	Gm24182	6.21003	-0.00337835	0.280316	0.956159		6.41564	0.00255521	0.152723	0.892584		4.75585	-0.180748	0.52026	0.278639
ENSMUSG00000026687	Aldh9a1	3612.76	0.0271393	0.0873966	0.744995	0.892453	3463.5	0.0499765	0.0773222	0.438938	0.732202	3730.19	-0.199668	0.0831454	0.0146858	0.045995	874.216	0.634451	0.244069	0.0069948	0.03131
ENSMUSG00000026688	Mgst3	2512.65	-0.301736	0.10122	0.00142815	0.0122852	2691.58	0.036208	0.0850496	0.611436	0.836646	2194.11	-1.29342	0.0972708	3.19488e-41	5.42755e-39	286.039	1.07497	0.496526	0.0124715	0.0486805
ENSMUSG00000040485	Lrrc52	71.1219	-0.00629636	0.230256	0.95302	0.98295	59.9713	-0.0431053	0.152488	0.392402	0.694574	71.8812	-0.216384	0.321819	0.38888	0.57974
ENSMUSG00000015843	Rxrg	8.31476	0.134194	0.325768	0.0685198		4.51459	0.00742452	0.153504	0.580511		8.95391	0.440244	0.699914	0.0723334	0.168747
ENSMUSG00000026686	Lmx1a	548.005	-0.316345	0.145346	0.0128264	0.0684112	515.482	-0.207126	0.192939	0.0503047	0.222207	535.664	-0.808401	0.165039	2.80772e-07	2.7015e-06	157.097	-0.77313	0.443068	0.0476639	0.130805
ENSMUSG00000052534	Pbx1	15.777	0.00565128	0.270273	0.954826	0.983546	12.9276	-0.0116355	0.152148	0.655117		12.581	-0.290379	0.528306	0.227736	0.399364	3.37897	0.154879	0.910839	0.577995	0.725093
ENSMUSG00000103780	RP24-93F24.2	3.13153	-0.0151792	0.284827	0.744209		3.52886	0.000335057	0.153127	0.984141
ENSMUSG00000102594	RP24-93F24.1	3.76262	-0.0717448	0.298183	0.120077		4.71435	-0.00813513	0.153485	0.562364		3.65468	-0.292467	0.630616	0.00982522
ENSMUSG00000026683	Nuf2	5431.22	-0.32979	0.0989613	0.00038673	0.00416436	5266.41	-0.233074	0.0952005	0.00372918	0.0371882	5252.86	-0.86774	0.0997514	8.51131e-19	3.21875e-17	488.455	1.01244	0.288362	0.000221747	0.00200194
ENSMUSG00000038530	Rgs4	32.1568	0.0390676	0.257125	0.747867	0.893419	36.6188	0.0531883	0.160209	0.222964		48.0343	0.57834	0.442991	0.0603388	0.146045
ENSMUSG00000026675	Hsd17b7	372.471	-0.0700952	0.150957	0.584774	0.806757	387.165	0.0737664	0.130737	0.359487	0.665217	463.253	0.189818	0.151781	0.189464	0.349321	208.043	0.825033	0.34813	0.0106771	0.0434733
ENSMUSG00000097503	3110045C21Rik	30.6472	0.0113943	0.257019	0.924352	0.973852	33.1107	0.0299004	0.152335	0.453792		42.6044	0.362732	0.414025	0.198772	0.362243	25.6151	0.298541	0.547222	0.505923	0.665047
ENSMUSG00000026674	Ddr2	1413.69	0.0911721	0.103364	0.344767	0.622307	1239.29	-0.0732203	0.105518	0.357316	0.66329	1819.64	0.461778	0.0975744	1.3767e-06	1.16118e-05	470.794	0.111614	0.25485	0.6508	0.778116
ENSMUSG00000026670	Uap1	1138.21	0.115088	0.110846	0.260374	0.532125	1093.16	0.115248	0.10951	0.162388	0.444297	1414.53	0.39772	0.108011	0.000159921	0.000885304	492.714	-0.614441	0.341402	0.0520868	0.139803
ENSMUSG00000104266	RP23-124N16.3	5.85909	-0.00796799	0.280871	0.897822		4.87229	-0.00549368	0.153239	0.709216		5.47067	-0.103881	0.484993	0.549022
ENSMUSG00000103908	RP23-124N16.4	4.62862	0.0545775	0.29126	0.29638							4.07986	0.0971201	0.497698	0.496966
ENSMUSG00000026667	Uhmk1	11658.2	-0.168627	0.0755681	0.0193832	0.0928048	11024.4	-0.158079	0.0744521	0.0163809	0.1057	13284	-0.118628	0.0698288	0.0856634	0.192195	1753.95	-0.246558	0.328794	0.422991	0.593431
ENSMUSG00000102752	Gm7694	1129.13	-0.380405	0.115217	0.000347079	0.00381552	1146.35	-0.132375	0.10528	0.104379	0.344299	1155.32	-0.709428	0.110345	4.52067e-11	7.43023e-10	60.4165	0.5285	0.623156	0.272957	0.443946
ENSMUSG00000038473	Nos1ap	695.671	-0.203775	0.128304	0.0755727	0.243561	711.982	-0.00298558	0.102485	0.967684	0.98863	677.292	-0.686911	0.135933	1.62468e-07	1.63181e-06	45.9694	0.902912	0.889236	0.107388	0.234287
ENSMUSG00000102193	RP24-212P5.2	7.20419	0.0374032	0.283199	0.584974		7.71525	0.0159015	0.153727	0.430661		6.20149	-0.00714056	0.4694	0.964689
ENSMUSG00000038463	Olfml2b	5.68709	0.0232616	0.282555	0.710418		2.70355	-0.0113612	0.154091	0.297367		5.50295	0.0151566	0.471991	0.932552
ENSMUSG00000026663	Atf6	477.699	0.0140912	0.139981	0.90958	0.967983	469.047	0.0595866	0.118428	0.456258	0.744119	573.318	0.198633	0.143547	0.148945	0.293158	105.337	0.515163	0.52153	0.23872	0.406387
ENSMUSG00000026659	Dusp12	254.733	-0.51828	0.212205	0.00270818	0.0202832	255.679	-0.206046	0.204626	0.0515755	0.225043	269.452	-0.772012	0.197316	2.67832e-05	0.000176165	171.848	-0.120838	0.420835	0.746428	0.844997
ENSMUSG00000070524	Fcrlb	6.03235	0.00839279	0.281317	0.895614		3.45937	-0.0127596	0.154133	0.304715		7.09747	0.0443701	0.465217	0.815218	0.900575	3.95087	0.584717	1.13678	0.105202	0.230891
ENSMUSG00000026656	Fcgr2b	9.97226	0.0557687	0.284768	0.467954	0.728436	10.3118	0.0233048	0.154586	0.32677		11.2842	0.193734	0.483601	0.390073	0.580848
ENSMUSG00000059089	Fcgr4	29.8844	-0.019563	0.257985	0.864083	0.94916	25.3136	-0.025561	0.152604	0.463799		28.5305	-0.29881	0.436542	0.271976	0.453049	1.69733	0.125057	0.879482	0.705838
ENSMUSG00000059498	Fcgr3	723.392	-0.181149	0.138145	0.134888	0.356287	780.916	0.0908223	0.120665	0.275765	0.587483	941.762	0.210123	0.134152	0.104365	0.223786	1667.12	-1.80094	0.437399	7.02362e-06	0.00011611
ENSMUSG00000026649	1700009P17Rik	36.7678	0.427237	0.573783	0.0343585	0.140992	21.6456	0.00010167	0.150003	0.999895		36.2538	0.517991	0.470791	0.0928001	0.204265	16.6431	-8.17809	2.87121	8.84608e-08	2.6763e-06
ENSMUSG00000058076	Sdhc	227.658	0.0856973	0.178051	0.544045	0.782874	224.368	0.0869232	0.147477	0.272	0.583766	242.984	0.00676087	0.190138	0.970829	0.984731	102.464	-0.651215	0.381846	0.0606721	0.156618
ENSMUSG00000038370	Pcp4l1	29.5087	0.167699	0.313655	0.192907	0.443371	17.8747	-0.0194631	0.152471	0.518211		33.8864	0.43351	0.468347	0.141667	0.282515	14.0129	-1.76607	1.20132	0.0156321	0.0577728
ENSMUSG00000005674	Tomm40l	9.05832	0.155847	0.34114	0.0529599	0.191791	6.58261	0.022257	0.155226	0.212361		7.25119	0.227046	0.535101	0.231861	0.404835
ENSMUSG00000005681	Apoa2	4.83402	0.112977	0.318865	0.0273895												2.31992	0.372661	1.03572	0.107553
ENSMUSG00000058715	Fcer1g	6.71217	-0.138348	0.333482	0.0273403		5.97186	-0.0347668	0.159272	0.0182067		8.49631	-0.386126	0.65026	0.0867614	0.194083	6.64996	0.0760783	0.756259	0.866921	0.923771
ENSMUSG00000013593	Ndufs2	151.295	-0.0125692	0.200365	0.928735	0.975395	156.01	0.0512879	0.143122	0.45243	0.741552	169.903	-0.00971695	0.232317	0.960766	0.980153	163.904	-2.27377	0.368318	9.93888e-11	6.47482e-09
ENSMUSG00000006403	Adamts4	125.946	0.0270038	0.204043	0.853205	0.943491	123.929	0.0385031	0.140664	0.557849	0.807778	119.031	-0.365457	0.26708	0.109082	0.231301	49.9442	0.455341	0.557397	0.317028	0.491007
ENSMUSG00000052423	B4galt3	394.934	-1.33112	0.185483	5.32345e-14	5.7868e-12	472.633	-0.309017	0.169021	0.0083778	0.0667463	461.299	-1.13625	0.158458	1.22122e-13	2.68236e-12	359.219	0.425333	0.426931	0.262928	0.433049
ENSMUSG00000062729	Ppox	23.719	0.0342422	0.265116	0.755647	0.897051	21.8949	0.00576878	0.150523	0.858309		24.6864	-0.0114436	0.401607	0.960021	0.9797	7.56894	-0.0368233	0.757435	0.931216	0.961642
ENSMUSG00000053483	Usp21	2233.81	-0.131457	0.0952942	0.141767	0.367898	2154.97	-0.0626472	0.0870751	0.383021	0.68638	2484.06	-0.154405	0.0898898	0.0802188	0.182713	483.023	0.755357	0.451612	0.0564682	0.148639
ENSMUSG00000062963	Ufc1	122.012	0.663735	0.304962	0.0032346	0.0233682	85.6583	0.0155613	0.142546	0.781049	0.920022	150.56	0.968198	0.265169	5.19405e-05	0.000323253	123.287	-0.543006	0.527098	0.21372	0.376405
ENSMUSG00000079137	Rpl27-ps1	2.51387	-0.0020611	0.285328	0.957253							4.05737	0.0811723	0.490229	0.591533		5.01548	-0.0352293	0.774401	0.932731	0.962433
ENSMUSG00000103983	RP23-395H6.2	44.8553	0.263745	0.364257	0.100605	0.294444	38.8343	0.043934	0.156832	0.285132		39.8213	0.118645	0.368436	0.645202	0.78972	8.90496	-0.00491065	0.767461	0.987544	0.992855
ENSMUSG00000013973	Dedd	309.963	-0.0579706	0.157147	0.659929	0.85011	290.568	-0.04359	0.124996	0.568556	0.813194	320.25	-0.294653	0.175913	0.0727496	0.169554	27.8057	1.05309	0.60285	0.0318539	0.0979398
ENSMUSG00000013997	Nit1	182.296	0.0966109	0.19064	0.50642	0.757545	165.808	0.0135646	0.132434	0.843996	0.944155	197.574	0.0610489	0.211729	0.752546	0.863041	81.7718	-0.867709	0.477788	0.035713	0.106207
ENSMUSG00000006412	Pfdn2	325.303	-0.106869	0.158984	0.420603	0.689826	324.166	0.00396746	0.119635	0.964567	0.987704	328.958	-0.425439	0.17602	0.00970239	0.0325735	264.315	-0.102166	0.370859	0.76152	0.855863
ENSMUSG00000102929	RP23-191A19.1	10.5208	0.0859378	0.293176	0.303044	0.580499	6.23693	-0.00328399	0.152736	0.856076		10.1846	0.148621	0.472093	0.491248	0.671962	3.12283	0.165902	0.894985	0.603175	0.744098
ENSMUSG00000006411	Pvrl4	16.4701	0.0868647	0.286958	0.375199	0.649579	15.3816	0.021525	0.153418	0.440673		30.5407	1.33152	0.641315	0.00325904	0.0127094	1.93776	-0.0700714	0.885187	0.813746
ENSMUSG00000048865	Arhgap30	26.3601	0.0793194	0.277986	0.464692	0.725715	17.5368	-0.0203939	0.152873	0.485404		49.5642	1.30116	0.52033	0.00129767	0.00568729	1.94471	-0.519761	1.13401	0.0696727
ENSMUSG00000026641	Usf1	740.426	0.325912	0.130691	0.00553519	0.0358654	718.541	0.330529	0.162888	0.00500041	0.045745	961.773	0.711356	0.120504	1.26615e-09	1.71614e-08	254.445	-1.28541	0.347265	7.37797e-05	0.000825035
ENSMUSG00000103711	Tstd1	6.36211	0.0434544	0.286065	0.479631		6.45785	0.0105089	0.153634	0.483607		10.5694	0.423465	0.661543	0.0906069	0.200412	6.91011	-0.820607	0.935276	0.133068	0.271909
ENSMUSG00000038235	F11r	377.738	0.384433	0.178774	0.0101094	0.0575232	281.923	-0.0736975	0.137804	0.350226	0.656631	473.536	0.700942	0.157899	3.28054e-06	2.59119e-05	483.664	-1.93327	0.420461	7.53872e-07	1.71474e-05
ENSMUSG00000091993	B930036N10Rik	75.8212	-0.183187	0.266119	0.240555	0.508663	68.1268	-0.092437	0.179017	0.122461	0.379413	78.5195	-0.520439	0.344106	0.0547623	0.135242	14.4446	-1.01865	0.925298	0.0784051	0.187389
ENSMUSG00000060244	Alyref2	45.8625	-0.137019	0.273058	0.327952	0.605978	42.6186	-0.0499099	0.157301	0.282892		55.4178	-0.12527	0.330911	0.616972	0.769402	23.853	-4.35445	0.925738	2.78474e-07	7.31268e-06
ENSMUSG00000038218	Gm9765	13.9689	-0.00599755	0.271849	0.944424	0.980711	10.7421	-0.0184517	0.153495	0.443413		17.0054	0.0652606	0.420835	0.786209	0.883588	2.78735	-0.663584	1.2168	0.0672855	0.168773
ENSMUSG00000038209	Itln1	18.4771	0.100421	0.289851	0.33447	0.61132	12.1737	-0.00721818	0.151883	0.774148		21.1969	0.295476	0.472555	0.270999	0.451942
ENSMUSG00000004709	Cd244	16.7734	0.0810164	0.283152	0.418611	0.688254	15.7497	0.0202289	0.15315	0.469819		16.9376	0.11847	0.433665	0.621393	0.773029	10.0123	0.0336738	0.714989	0.945058	0.968864
ENSMUSG00000004707	Ly9	6.79167	-0.0834776	0.301394	0.122572		5.31294	-0.00589269	0.153973	0.111373		7.21568	-0.320489	0.627768	0.0671538	0.159226
ENSMUSG00000038179	Slamf7	41.1879	0.0389962	0.249854	0.762219	0.900282	52.9898	0.119288	0.211762	0.0436904	0.203299	52.6235	0.294747	0.367009	0.272147	0.453162	45.2362	-1.1304	0.509526	0.00982599	0.0406903
ENSMUSG00000103219	RP23-116M12.7	8.25092	0.14674	0.335001	0.054555		4.21848	0.0103647	0.153564	0.504898		2.76039	-0.0385955	0.489431	0.769239
ENSMUSG00000103083	RP23-145F9.4	47.5048	-0.0437507	0.245962	0.736958	0.889294	53.8275	0.0377687	0.151593	0.434062	0.727465	41.9638	-0.65119	0.474708	0.0434075	0.112248
ENSMUSG00000103137	RP23-145F9.2	5.58939	-0.0128126	0.282382	0.823511		6.03205	0.00110086	0.15281	0.952508		5.91862	-0.0642222	0.480669	0.690034
ENSMUSG00000015355	Cd48	15.1291	0.00476026	0.272195	0.960333	0.985977	12.9883	-0.00635382	0.151688	0.806261		15.0842	-0.0823381	0.432213	0.720291	0.841193
ENSMUSG00000103883	RP23-145F9.3	115.638	-1.10299	0.317022	3.45194e-05	0.000565497	121.051	-0.521023	0.38847	0.00652997	0.0558157	111.662	-2.02734	0.331792	8.9971e-11	1.42909e-09	18.6028	-1.02541	1.01657	0.0795712	0.18916
ENSMUSG00000059058	Tma7-ps	9.2859	0.0328465	0.279608	0.672446	0.856648	6.53661	-0.00705524	0.152825	0.712277		7.5825	-0.0899336	0.473245	0.628192	0.777906	3.33225	-0.0105189	0.78063	0.978442	0.988078
ENSMUSG00000015316	Slamf1	215.071	-0.00940818	0.176958	0.946444	0.98124	200.79	-0.0162438	0.129861	0.81751	0.933228	225.681	-0.172755	0.203139	0.351125	0.541351	90.6935	1.9353	0.469328	6.78329e-06	0.000112635
ENSMUSG00000038147	Cd84	42.9768	0.0214611	0.246686	0.869709	0.950666	37.591	-0.0132525	0.148051	0.753499		46.0776	-0.0266763	0.337188	0.913393	0.9565	25.85	3.60237	1.15296	0.000115863	0.00118283
ENSMUSG00000073492	Gm10521	3.08804	-0.0154018	0.285392	0.727021							3.35383	-0.0708031	0.490708	0.619693
ENSMUSG00000104413	RP23-77A8.2	7.60463	0.0467776	0.284382	0.509083		7.57515	0.0151534	0.153552	0.459164		9.28386	0.193623	0.495797	0.361822	0.55283	8.98508	0.32612	0.768412	0.490882	0.652775
ENSMUSG00000015314	Slamf6	12.2777	0.108925	0.302301	0.219872	0.482439	8.49907	0.0076947	0.152539	0.722926		13.5951	0.325556	0.536763	0.200294	0.364118	5.97247	0.928678	1.56642	0.0394719	0.114278
ENSMUSG00000026556	Vangl2	14.6791	0.0692841	0.281942	0.461642	0.724136	10.5195	-0.00329753	0.151966	0.887205		16.108	0.180094	0.449722	0.461298	0.64674	2.59314	-0.198465	0.879443	0.578809
ENSMUSG00000051251	Nhlh1	3.11631	0.0314263	0.286891	0.505777							4.11553	0.149739	0.511227	0.337095
ENSMUSG00000003458	Ncstn	531.045	-0.128541	0.137468	0.285377	0.56135	493.94	-0.115072	0.131498	0.180603	0.471523	518.795	-0.57694	0.156733	0.000104935	0.000607674	167.608	0.417768	0.49338	0.322066	0.496033
ENSMUSG00000026553	Copa	3594.56	-0.363922	0.11011	0.00036766	0.00398174	3461.22	-0.29163	0.100431	0.000667674	0.0101909	3566.82	-0.814968	0.0873584	3.03325e-21	1.40635e-19	284.324	-0.827914	0.356646	0.0117761	0.0466183
ENSMUSG00000003464	Pex19	1018.8	-0.388026	0.128023	0.000829888	0.00784262	1091.33	-0.0226391	0.0973706	0.763313	0.911693	1167.66	-0.327982	0.116107	0.00359093	0.013835	709.756	-0.989423	0.399191	0.00620959	0.028463
ENSMUSG00000089803	Gm10171	11.1592	-0.00956906	0.274961	0.905521	0.96653	13.7071	0.0189607	0.153072	0.48514		13.1373	0.0178907	0.433391	0.939245	0.968604	3.28825	-0.243889	0.852955	0.546916	0.69946
ENSMUSG00000026554	Dcaf8	11001.8	-0.221659	0.0940513	0.0121626	0.0657389	10969.9	-0.0613801	0.0795981	0.364737	0.669513	11317.4	-0.505534	0.0862082	2.56354e-09	3.32206e-08	804.778	0.0277426	0.357808	0.934728	0.963217
ENSMUSG00000013698	Pea15a	31.2665	0.191779	0.32866	0.154149	0.388025	20.2506	-0.00802324	0.150664	0.797213		35.2579	0.460477	0.47389	0.124373	0.255914	25.7288	0.170521	0.560105	0.707228	0.817347
ENSMUSG00000007122	Casq1	23.2095	0.155547	0.315723	0.186077	0.434083	14.3586	-0.00786557	0.151459	0.77615		24.533	0.329961	0.464043	0.235128	0.408865	1.59927	-0.12382	0.88315	0.699249
ENSMUSG00000007107	Atp1a4	25.9982	0.559556	1.09005	0.0158811	0.080326	14.2155	0.0152649	0.152458	0.575948		35.6571	1.68779	0.605161	0.00041647	0.00208283	1.80704	0.326708	0.983513	0.243087
ENSMUSG00000038034	Igsf8	72.629	0.16247	0.258398	0.289373	0.565268	58.5539	-0.00479882	0.144302	0.921798	0.971146	77.8939	0.192891	0.301168	0.430005	0.617955	4.54349	1.22291	1.80768	0.0406287	0.116813
ENSMUSG00000007097	Atp1a2	6.77211	0.058963	0.289315	0.36256		3.96847	-0.000336481	0.153214	0.977222		4.02502	-0.0479221	0.484429	0.746672
ENSMUSG00000038026	Kcnj9	2.50909	0.0125244	0.285382	0.772402							7.29638	0.454864	0.747285	0.0536214	0.132983
ENSMUSG00000044708	Kcnj10	32.8964	0.181119	0.314453	0.187799	0.436352	16.7513	-0.0454273	0.161046	0.116216		41.2587	0.635015	0.473629	0.0484965	0.122637	23.0678	2.80928	0.907578	0.000200211	0.00184492
ENSMUSG00000050229	Pigm	296.189	-0.0108194	0.161814	0.934949	0.976849	318.668	0.154036	0.174454	0.10134	0.338853	337.315	0.038826	0.17526	0.815511	0.900716	349.364	-1.00013	0.314588	0.000723811	0.00528843
ENSMUSG00000102278	RP23-157J4.3	6.78851	0.0387806	0.284005	0.560285		4.38615	-0.00304165	0.153111	0.838219		5.85222	0.00369158	0.470331	0.985942
ENSMUSG00000103357	RP24-144H23.4	4.39755	0.0500147	0.289299	0.363395		3.28804	0.00645268	0.153419	0.636342
ENSMUSG00000037995	Igsf9	11.432	0.175116	0.352755	0.0587511	0.205793	5.81559	0.00656095	0.15294	0.719872		9.47474	0.240899	0.525147	0.256926	0.435792	6.6247	-0.11915	0.829343	0.760174	0.855198
ENSMUSG00000026547	Tagln2	56.6811	-0.0975813	0.256118	0.475451	0.733061	57.4606	-0.0134894	0.145351	0.783723	0.920651	67.5348	-0.0905029	0.314102	0.711406	0.834657	222.227	2.0956	0.61532	9.07974e-05	0.000971189
ENSMUSG00000026546	Cfap45	244.841	-0.1375	0.179904	0.333652	0.610973	243.795	-0.0167783	0.125957	0.817321	0.933193	265.56	-0.261858	0.194275	0.14238	0.283522	32.2033	0.870006	0.592104	0.0689162	0.171549
ENSMUSG00000085184	4933439K11Rik	4.10921	0.0251679	0.28472	0.637666		3.72766	0.00588248	0.153276	0.691238		4.38557	0.0664585	0.483708	0.676238
ENSMUSG00000070504	Fcrl6	2.84311	-0.0622396	0.296241	0.105796		3.01567	-0.0145267	0.154408	0.228419		5.5224	-0.0228313	0.473353	0.890732
ENSMUSG00000026544	Dusp23	118.308	0.0195551	0.209642	0.893861	0.961164	113.486	0.0150667	0.139182	0.805684	0.928814	128.049	-0.0447325	0.263215	0.840439	0.915031	36.3251	1.47115	0.610846	0.00394172	0.0201197
ENSMUSG00000060128	Gm10075	3.67788	-0.00342655	0.283459	0.944745		6.07936	0.017092	0.154192	0.344567		4.25784	0.00243584	0.480357	0.990109
ENSMUSG00000037942	Crp	39.0609	-0.00921313	0.250159	0.938742	0.978328	45.5232	0.04985	0.157174	0.287839		41.668	-0.0891098	0.357689	0.724688	0.844335
ENSMUSG00000005338	Cadm3	4.41278	0.00419931	0.282651	0.942321		6.18276	0.0147193	0.153809	0.41424		5.81183	0.0620812	0.478407	0.71266
ENSMUSG00000037860	Aim2	14.3797	-0.0593363	0.282157	0.492132	0.74721	12.1586	-0.0315162	0.156439	0.217086		17.8236	-0.101138	0.423718	0.671312	0.807259
ENSMUSG00000073491	Pydc4	4.17702	0.0573794	0.29328	0.209622		2.89672	0.0102835	0.153887	0.391027		2.69406	0.0778269	0.497491	0.543155		2.35173	0.00535634	0.878113	0.988737
ENSMUSG00000066677	Pydc3	14.6368	0.0774901	0.285176	0.408638	0.6795	8.27547	-0.0166562	0.153758	0.416267		11.4345	-0.0800215	0.451583	0.70445	0.829306
ENSMUSG00000073490	AI607873	3.27183	-0.00583943	0.284945	0.889642
ENSMUSG00000039997	Ifi203	5.45253	-0.0683639	0.294557	0.23298		6.12292	-0.00914497	0.153421	0.559641		6.20143	-0.209429	0.534712	0.215059
ENSMUSG00000026535	Ifi202b	3.02897	-0.0224975	0.286403	0.597242		2.44831	-0.0100789	0.153947	0.355271		2.79268	-0.123202	0.514334	0.3031
ENSMUSG00000091950	Olfr421-ps1	9.76507	-0.0208032	0.277827	0.784381	0.912501	7.939	-0.0139148	0.153435	0.48308		10.5112	-0.0821909	0.454344	0.694313	0.823263
ENSMUSG00000055033	Olfr420	4.20171	-0.033453	0.285775	0.535242		7.44966	0.016245	0.153733	0.426676		6.24357	0.00573873	0.467886	0.976982	0.988069
ENSMUSG00000026532	Spta1	40.7518	-0.34143	0.431177	0.0598197	0.208416	43.767	-0.0372229	0.153719	0.380775		47.5829	-0.493604	0.415018	0.091717	0.202353
ENSMUSG00000028354	Fmn2	13903.1	-0.369487	0.0804415	1.69565e-06	4.22459e-05	13670.8	-0.238258	0.0719061	0.000263712	0.00498277	14047.4	-0.737612	0.0754145	4.53302e-23	2.42188e-21	958.217	0.902043	0.423277	0.0175039	0.0627916
ENSMUSG00000026527	Rgs7	20.7718	-0.00665228	0.264547	0.947046	0.981589	16.9726	-0.0190131	0.152628	0.514066		19.258	-0.247501	0.45732	0.335858	0.525829
ENSMUSG00000103079	RP24-151M13.1	214.961	-0.117187	0.182364	0.411345	0.682	229.409	0.0577197	0.135587	0.444382	0.735202	199.149	-0.762714	0.228889	0.000247461	0.00131181	23.0984	0.407898	0.619028	0.391897	0.564121
ENSMUSG00000026526	Fh1	438.219	-0.237222	0.155354	0.0724641	0.237096	413.498	-0.16979	0.157287	0.0786421	0.290922	424.332	-0.764196	0.179409	6.02637e-06	4.52655e-05	107.83	0.0742885	0.380043	0.832746	0.901607
ENSMUSG00000039783	Kmo	4.94229	-0.0365933	0.286459	0.489579		4.35937	-0.012535	0.153846	0.404453		5.63075	-0.110666	0.491252	0.497888
ENSMUSG00000026525	Opn3	67.1163	0.033812	0.232221	0.809786	0.924698	50.2698	-0.0770655	0.171382	0.138627		60.2432	-0.419016	0.362981	0.124708	0.256433	37.8917	0.755972	0.586612	0.108401	0.235575
ENSMUSG00000078185	Chml	709.531	0.0726074	0.121873	0.51144	0.760735	675.164	0.0587976	0.107169	0.456379	0.744184	845.364	0.244947	0.125006	0.0427267	0.110963	216.356	1.22802	0.310189	2.90739e-05	0.000383624
ENSMUSG00000026523	Wdr64	69.4329	0.335289	0.34611	0.0732801	0.238842	50.3658	-0.00154022	0.145438	0.971934		80.4619	0.576111	0.347475	0.0363287	0.0972393
ENSMUSG00000077794	Gm25560	2.79446	0.0475576	0.291434	0.244869
ENSMUSG00000039748	Exo1	2850.28	-0.0842851	0.0964868	0.35275	0.628727	2564.76	-0.20657	0.093977	0.00868618	0.0681943	3031.22	-0.238439	0.0924402	0.00858083	0.0293152	359.022	-0.0734367	0.267896	0.772727	0.86332
ENSMUSG00000104158	RP24-531A1.1	339.889	-0.385133	0.182867	0.0109436	0.0608225	319.657	-0.345741	0.210341	0.00902492	0.0699726	429.258	-0.0765851	0.154961	0.602388	0.758909	477.702	-4.1185	0.444916	1.45706e-21	5.67556e-19
ENSMUSG00000103540	RP24-531A1.2	3.94982	0.034413	0.287435	0.459032
ENSMUSG00000055214	Pld5	16.1401	0.0633425	0.278165	0.518135	0.764818	10.1686	-0.0178517	0.153479	0.449161		23.139	0.491919	0.552102	0.10943	0.231902	4.694	-0.202834	0.871801	0.578903	0.725828
ENSMUSG00000078184	B020018G12Rik	410.936	-0.281489	0.173166	0.048604	0.180657	452.582	0.042279	0.121183	0.580258	0.819834	405.4	-0.75951	0.181978	9.19939e-06	6.65693e-05	182.732	-2.39337	0.600311	7.56341e-06	0.000123182
ENSMUSG00000057335	Cep170	2284.4	-0.220882	0.0986138	0.0166639	0.0831188	2312.37	-0.0244321	0.0877219	0.73401	0.899764	2327.39	-0.537938	0.0890024	7.78871e-10	1.09224e-08	453.141	0.714604	0.334942	0.0220229	0.074934
ENSMUSG00000103435	RP23-440J24.2	15.8847	0.0494502	0.275154	0.609631	0.822451	14.0591	0.00723919	0.151517	0.794805		13.0127	-0.142544	0.454612	0.530569	0.70452	23.9832	2.49138	0.871574	0.000479037	0.00376801
ENSMUSG00000084749	Gm25288	6.49629	-0.00340103	0.280755	0.954288		6.48001	0.00135128	0.152698	0.94403		5.13275	-0.161509	0.511505	0.325945
ENSMUSG00000026504	Sdccag8	95.3619	-0.216299	0.26905	0.184091	0.431346	102.499	-0.0110283	0.14014	0.848938	0.945359	109.306	-0.288715	0.285389	0.223218	0.393632	14.4339	-0.226679	0.619942	0.626541	0.760135
ENSMUSG00000103367	RP23-293I7.1	22.4114	-0.0319811	0.265605	0.76283	0.900677	23.064	0.00284453	0.150214	0.932856		24.905	-0.0864565	0.398182	0.726343	0.845475	4.30585	0.755421	1.18123	0.105784	0.231768
ENSMUSG00000019699	Akt3	7068.75	-0.140652	0.0768264	0.0568459	0.201137	7055.01	0.00599854	0.0685687	0.923287	0.971564	7908.8	-0.14284	0.0724504	0.0457491	0.117078	738.546	0.373879	0.273788	0.153434	0.299484
ENSMUSG00000103646	RP23-379C24.2	14.5699	-0.0593162	0.296225	0.0608291	0.210563	13.246	-0.012273	0.15448	0.0574245		15.3489	-0.145977	0.536658	0.0207075	0.0609564
ENSMUSG00000097892	Gm26801	2.98987	0.0507726	0.292292	0.216335
ENSMUSG00000063659	Zbtb18	3128.04	-0.175944	0.0910895	0.0409982	0.160383	2870.7	-0.245445	0.096934	0.0026855	0.0289755	3430.39	-0.243095	0.0845666	0.00350738	0.0135564	149.268	0.74032	0.379907	0.0329957	0.100312
ENSMUSG00000102885	RP23-326H11.2	9.53916	-0.113469	0.309161	0.153868	0.387518	14.7282	0.00960881	0.151636	0.732731		9.69764	-0.515873	0.778577	0.0574765	0.140477
ENSMUSG00000101746	2310043L19Rik	2.89694	0.0378981	0.288568	0.394331		2.95359	0.0114871	0.153968	0.361034		2.92533	0.0997303	0.501203	0.458394		5.15697	0.660174	1.30277	0.0176266	0.0630626
ENSMUSG00000015961	Adss	6711.73	-0.3515	0.0827366	9.16132e-06	0.000181529	6592.56	-0.218493	0.0790638	0.00172431	0.021038	7216.78	-0.488473	0.0856038	6.315e-09	7.80669e-08	1332.22	0.992095	0.317059	0.000882697	0.00616482
ENSMUSG00000102483	RP23-474A1.1	4.93571	-0.0226539	0.283502	0.6916		5.06909	-0.00349812	0.152942	0.832222		4.47615	-0.161757	0.515512	0.298021
ENSMUSG00000091476	Gm16432	41.8722	0.0906537	0.262325	0.489836	0.745968	38.6367	0.0223858	0.149417	0.60468		43.435	0.0575321	0.360538	0.82285	0.904869	15.3849	0.301745	0.661238	0.530292	0.685344
ENSMUSG00000026502	Desi2	5271.74	-0.138452	0.0792662	0.0684998	0.228897	5037.02	-0.0968066	0.0753443	0.140592	0.411564	5683.01	-0.254529	0.0743558	0.000531508	0.00258387	1597.62	1.01802	0.287162	0.000194784	0.00180559
ENSMUSG00000103958	RP24-259F2.1	3.25832	0.0115726	0.284359	0.814384		3.14812	0.00335121	0.153289	0.804287		4.09932	0.0679342	0.486224	0.661078
ENSMUSG00000070489	4930527J03Rik	3.72399	-0.0549931	0.293264	0.179546		3.5059	-0.0144253	0.154443	0.205772		7.22208	0.0214802	0.46799	0.907356	0.953049
ENSMUSG00000104126	RP24-252K15.3	40.0596	0.0184595	0.249104	0.885702	0.957651	40.2093	0.0209013	0.148844	0.632876		39.729	-0.139191	0.363575	0.587126	0.747774	9.62977	-0.339554	0.767636	0.474393	0.639351
ENSMUSG00000086350	B230369F24Rik	12.1834	0.176685	0.354821	0.0540723	0.194696	8.31131	0.0204661	0.154524	0.308722		13.9865	0.643316	0.875754	0.0450664	0.115726	4.36817	0.0505318	0.803075	0.906415	0.948098
ENSMUSG00000039630	Hnrnpu	13050.3	-0.496495	0.0860553	1.98192e-09	1.02838e-07	14473.3	-0.00842905	0.074958	0.898415	0.963248	14732.9	-0.470873	0.0755859	2.77016e-10	4.12865e-09	1355.98	0.355931	0.331692	0.249452	0.418033
ENSMUSG00000104279	RP24-252K15.4	5.91034	0.00380174	0.280784	0.955146		4.18735	-0.00834679	0.153431	0.574885		6.73366	0.0204125	0.47648	0.903824	0.951059	3.86944	0.712373	1.0944	0.142267	0.284397
ENSMUSG00000026495	Efcab2	44.3942	0.0296873	0.247824	0.818865	0.928687	35.9563	-0.027274	0.151163	0.50551		50.0477	0.0723318	0.34156	0.77651	0.877446	11.1928	0.165807	0.693953	0.727806	0.832383
ENSMUSG00000026494	Kif26b	205.133	-0.157125	0.195171	0.288543	0.564325	177.049	-0.266255	0.280208	0.0283778	0.152606	211.248	-0.450481	0.214081	0.0200142	0.0592774	23.2104	0.75377	0.684718	0.140846	0.282462
ENSMUSG00000055067	Smyd3	478.748	0.101302	0.142132	0.413944	0.684617	529.743	0.436942	0.173365	0.000987839	0.0135765	537.335	0.126397	0.147075	0.369543	0.560566	156.324	-1.27114	0.369286	0.00020218	0.00185757
ENSMUSG00000096474	Gm5561	5.84395	0.0547175	0.28988	0.341434		2.94506	-0.00179851	0.153325	0.881738		4.84001	0.0685968	0.484802	0.661611		3.39053	-1.23577	2.61564	0.011856	0.0468204
ENSMUSG00000026492	Tfb2m	1963.62	0.0338836	0.0956242	0.708128	0.8743	1936.83	0.11308	0.0948354	0.139946	0.410891	2403.76	0.28006	0.0905374	0.0016511	0.00701919	1003.03	-0.465623	0.2617	0.0628165	0.160468
ENSMUSG00000082395	Gm15480	3.35387	-0.030246	0.286998	0.505684		3.5652	-0.00634427	0.15338	0.645154		3.65954	-0.104172	0.501162	0.452103
ENSMUSG00000038949	Cnst	8198.47	-0.255446	0.0777271	0.000620048	0.00618712	8242.54	-0.0675988	0.0703005	0.2774	0.589059	8599.68	-0.469421	0.0852897	2.2109e-08	2.50788e-07	537.397	0.366144	0.252023	0.131569	0.269894
ENSMUSG00000038936	Sccpdh	238.46	0.0294108	0.170797	0.832261	0.935428	228.78	0.0277182	0.128026	0.704573	0.885434	238.216	-0.25505	0.199855	0.163201	0.313268	177.315	2.0015	0.470847	3.43761e-06	6.39532e-05
ENSMUSG00000087236	Gm1305	71.5999	1.15567	0.410168	0.000288637	0.00328054	41.377	0.0238788	0.149223	0.592416		114.659	1.95953	0.323034	1.20683e-10	1.87849e-09	9.33467	0.491291	0.862548	0.310674	0.48465
ENSMUSG00000026491	Ahctf1	13806.4	-0.0348973	0.074948	0.626561	0.831485	14142.1	0.158117	0.0763705	0.0181904	0.112887	16290.5	0.115368	0.0692117	0.0925635	0.203889	1835.28	-0.172904	0.260368	0.487065	0.649655
ENSMUSG00000073486	Gm10518	20.7765	-0.0192073	0.265274	0.853453	0.943604	19.8393	-0.00457	0.150377	0.887673		27.2028	0.128459	0.397224	0.614747	0.767986
ENSMUSG00000026490	Cdc42bpa	3416.58	-0.505346	0.0983574	6.62972e-08	2.34858e-06	3215.49	-0.518352	0.0952771	4.69921e-09	5.86016e-07	3284.25	-1.1185	0.101469	4.83027e-29	3.91919e-27	232.917	0.754283	0.341352	0.0175217	0.0628315
ENSMUSG00000026489	Adck3	49.8321	0.0586365	0.249244	0.65959	0.850066	45.686	0.0101417	0.146609	0.826821		71.1394	0.593809	0.367018	0.0371377	0.0989729	17.8011	-0.8787	1.05805	0.107797	0.234741
ENSMUSG00000010609	Psen2	448.786	-0.106365	0.146687	0.398888	0.670429	411.776	-0.107481	0.142071	0.208675	0.505065	449.091	-0.464201	0.162404	0.00244902	0.00993356	68.3231	0.767356	0.477453	0.0628255	0.160468
ENSMUSG00000102923	RP23-226J18.5	2.80879	0.00501593	0.284679	0.913656
ENSMUSG00000038855	Itpkb	9.21215	0.0175198	0.277865	0.820703	0.929366	8.19077	0.00168249	0.152373	0.938838		11.9893	0.155961	0.469145	0.483582	0.665118
ENSMUSG00000053963	6330403A02Rik	5.67664	0.0445815	0.28764	0.433934		4.77609	0.008088	0.153434	0.587008		3.04651	-0.0110007	0.50315	0.842324		3.28688	0.537286	1.15924	0.0437492	0.123196
ENSMUSG00000026496	Parp1	982.912	0.161063	0.115284	0.126633	0.341563	920.992	0.101982	0.108685	0.211155	0.508636	1246.86	0.496499	0.110142	3.70592e-06	2.90292e-05	150.592	-2.5281	0.507061	6.69972e-08	2.09473e-06
ENSMUSG00000058729	Lin9	881.699	-0.068581	0.114083	0.511457	0.760735	865.133	0.0146154	0.0984427	0.848014	0.945359	952.857	-0.169231	0.117882	0.139279	0.279238	463.92	-0.0907361	0.32766	0.764813	0.85812
ENSMUSG00000026497	Mixl1	11.9544	0.245496	0.445924	0.014318	0.0743328	5.29451	0.0110139	0.153543	0.499357		12.358	1.04717	1.32071	0.0193681	0.0577168	68.9003	-4.59145	0.81966	1.00755e-09	4.98366e-08
ENSMUSG00000026499	Acbd3	7503.35	-0.25345	0.102272	0.00780804	0.0470951	7661.94	-0.0335475	0.0769767	0.612775	0.836646	8050.48	-0.401112	0.087324	3.07479e-06	2.44019e-05	287.649	-0.160411	0.335246	0.604926	0.745226
ENSMUSG00000103649	RP23-201I6.5	6.15229	0.0557751	0.289369	0.365511		2.48284	-0.00699993	0.153627	0.544671		5.40751	0.0813473	0.48296	0.629335
ENSMUSG00000103156	RP23-201I6.6	12.3293	0.0204853	0.275311	0.811206	0.925069	14.4003	0.0227268	0.153926	0.395602		10.6646	-0.123133	0.46721	0.553677	0.721655	2.84225	-0.888262	1.61267	0.0210646	0.0725496
ENSMUSG00000060743	H3f3a	3465.67	-0.462085	0.0941055	2.54326e-07	7.76874e-06	3772.18	-0.0296333	0.0786641	0.660345	0.860863	3863.9	-0.478857	0.100748	1.16348e-06	9.95667e-06	2180.74	-0.817737	0.243133	0.000473727	0.00373567
ENSMUSG00000073485	H3f3aos	45.8229	-0.140832	0.279095	0.308529	0.58598	47.2983	-0.021824	0.148107	0.633981		53.6083	-0.217133	0.345439	0.399453	0.590088	17.9924	-0.846845	0.697737	0.101431	0.224619
ENSMUSG00000084558	Gm24836	8.29362	0.010105	0.280506	0.879503		9.19844	0.0125575	0.15305	0.559305		8.02411	-0.0348121	0.462852	0.851045	0.921728
ENSMUSG00000038806	Sde2	674.653	-0.277628	0.151143	0.0332129	0.13775	762.882	0.108731	0.122138	0.200704	0.495568	825.419	-0.0557454	0.124964	0.644604	0.789363	445.123	-0.919837	0.388856	0.00921734	0.0386752
ENSMUSG00000066652	Lefty2	5.94725	0.024246	0.28207	0.708793		3.42527	-0.00949726	0.153658	0.483095		6.48301	0.0622214	0.472593	0.732649	0.849986
ENSMUSG00000026520	Pycr2	125.672	-0.0150048	0.207174	0.915089	0.970171	134.031	0.0672771	0.151974	0.32257	0.632596	142.607	0.00274285	0.234533	0.990818	0.995074	12.7275	-1.31301	0.91111	0.0327774	0.0997621
ENSMUSG00000026519	Tmem63a	14.8995	0.0262371	0.274571	0.769029	0.904319	14.4994	0.00969313	0.151717	0.726557		22.8933	0.443578	0.530955	0.136041	0.274239	19.2129	-0.685077	0.63293	0.160015	0.307863
ENSMUSG00000038776	Ephx1	2.92	0.0260639	0.286294	0.57087		3.54372	0.0116776	0.153921	0.382434		6.21777	0.335022	0.622536	0.0951146	0.208096	3.91502	0.68614	1.0877	0.147267	0.291216
ENSMUSG00000038768	9130409I23Rik	128.838	-0.145844	0.223871	0.338424	0.615483	112.043	-0.145526	0.216046	0.0728841	0.278176	132.529	-0.451766	0.268444	0.0491473	0.123851	176.278	1.36462	0.538568	0.00329247	0.0174438
ENSMUSG00000102219	RP24-242P4.3	7.31982	-0.00343737	0.28068	0.953948		7.06196	0.000539292	0.152471	0.981382		7.14265	-0.077472	0.471389	0.674327	0.809542	4.90236	0.0772119	0.866689	0.823196	0.896354
ENSMUSG00000026516	Nvl	766.149	0.00359664	0.122127	0.975006	0.990533	745.626	0.0482947	0.105688	0.537324	0.795251	834.031	-0.0652704	0.123391	0.58434	0.745908	409.014	-0.751268	0.433377	0.0500365	0.135388
ENSMUSG00000062169	Cnih4	126.171	0.0780014	0.206176	0.595692	0.813916	133.072	0.12332	0.185425	0.122819	0.380104	152.825	0.295628	0.239357	0.161701	0.311128	419.915	-1.00204	0.53445	0.0254262	0.0829514
ENSMUSG00000038733	Wdr26	23966.9	0.00380876	0.0707354	0.961001	0.985992	23466.5	0.0862864	0.0653635	0.149599	0.424567	26658	-0.00926993	0.0668252	0.887859	0.942223	1836.21	0.470084	0.371095	0.167863	0.317956
ENSMUSG00000054135	A430110L20Rik	12.2803	0.042097	0.279059	0.613385	0.824143	8.02206	-0.0115594	0.153104	0.564721		10.9042	-0.0367044	0.449588	0.857006	0.925211	5.43278	-2.3922	2.08601	0.0137389	0.0524131
ENSMUSG00000103260	RP23-292F19.4	13.519	0.113358	0.303907	0.21211	0.471361	6.87716	-0.00875892	0.152893	0.655165		9.15763	-0.0262608	0.451964	0.895246	0.946055
ENSMUSG00000026514	Cnih3	20.8352	0.110899	0.29081	0.31562	0.593276	19.4455	0.0298546	0.154488	0.356521		14.9339	-0.170947	0.451905	0.472723	0.656796
ENSMUSG00000047369	Dnah14	462.934	0.0939339	0.151008	0.466235	0.726886	429.168	0.0342032	0.115027	0.660795	0.861024	453.232	-0.238372	0.151613	0.0982164	0.213589	230.39	1.48735	0.466403	0.000367012	0.00303771
ENSMUSG00000004880	Lbr	879.489	0.14408	0.118417	0.180339	0.426476	896.788	0.296131	0.130861	0.003745	0.0371895	1069.23	0.374268	0.115062	0.000818278	0.0037786	645.724	-0.696904	0.301575	0.0141526	0.0535649
ENSMUSG00000056699	Gm5533	2.98341	-0.0544815	0.29325	0.18933		4.16909	-0.00474214	0.15318	0.750531		5.24919	-0.0235653	0.480251	0.875919		3.16987	-0.0448127	0.850812	0.898126	0.943704
ENSMUSG00000022995	Enah	4343.02	-0.062617	0.0822458	0.426015	0.694196	4026.75	-0.102909	0.0793067	0.130816	0.394947	4507.03	-0.289288	0.0824658	0.000368875	0.00186843	767.216	0.862174	0.298615	0.00228068	0.0130683
ENSMUSG00000103722	RP23-73N8.4	3.40942	0.0366078	0.287966	0.433156							2.68602	0.0424527	0.491151	0.744265		2.90791	0.396632	0.948228	0.308092	0.481719
ENSMUSG00000103317	RP23-73N8.3	4.48708	0.00372195	0.282796	0.948407		4.1149	0.000352126	0.153064	0.984105		3.598	-0.0888971	0.49357	0.543353		4.11003	-0.796044	1.17611	0.106941	0.233667
ENSMUSG00000102950	RP23-73N8.2	4.44664	0.0126601	0.282842	0.825444		2.93488	-0.00607611	0.153457	0.634732		3.94896	-0.0344977	0.481452	0.819722		6.45165	0.127211	0.726097	0.78675	0.872419
ENSMUSG00000102760	RP23-73N8.1	6.06539	0.0398871	0.285288	0.518567		3.35015	-0.00560136	0.153389	0.671524		5.71328	0.0538564	0.476092	0.753681		4.03184	0.0475779	0.803553	0.91116	0.951411
ENSMUSG00000026511	Srp9	1033.6	-0.157202	0.115111	0.134693	0.35595	1004.7	-0.0626747	0.0999178	0.415926	0.714126	1232.96	0.016401	0.11305	0.883295	0.939977	1305.2	-0.0387237	0.305106	0.884064	0.935329
ENSMUSG00000091013	Vmn1r1	3.46246	0.0115064	0.285004	0.798682		3.94455	0.0068317	0.153467	0.607991		5.37367	0.124731	0.500949	0.419257
ENSMUSG00000038633	Degs1	2360.17	-0.251623	0.0954863	0.00506789	0.0334842	2374.59	-0.062382	0.084508	0.377755	0.681271	2464.4	-0.488106	0.0902183	3.62093e-08	3.97863e-07	1588.55	0.585807	0.262665	0.0199538	0.069552
ENSMUSG00000100147	1700047M11Rik	4.05276	-0.0467297	0.289485	0.342395		5.06909	-0.00349812	0.152942	0.832222		4.70742	-0.138464	0.502697	0.392822
ENSMUSG00000047539	Fbxo28	1908.3	-0.291762	0.108766	0.00372621	0.0260433	1947.66	-0.0583784	0.0896259	0.424712	0.721219	2121.22	-0.325418	0.0990007	0.000778676	0.00361261	443.062	0.225692	0.276367	0.394046	0.56612
ENSMUSG00000026510	Trp53bp2	214.992	0.276133	0.212051	0.0839694	0.26117	155.467	-0.0900917	0.165403	0.200561	0.495526	324.228	1.03948	0.197211	2.5317e-08	2.85095e-07	84.5052	0.703964	0.443787	0.0723764	0.177541
ENSMUSG00000026509	Capn2	17.893	0.0738553	0.279872	0.467499	0.728078	17.4665	0.0194519	0.153189	0.473429		22.5197	0.332301	0.480309	0.228665	0.400574
ENSMUSG00000104415	RP23-67I3.5	3.1697	0.0571891	0.293498	0.196796		2.83218	0.0135051	0.154292	0.248067
ENSMUSG00000038599	Capn8	48.0585	0.0475571	0.246397	0.72179	0.881423	44.0262	0.00634491	0.146931	0.887602		41.69	-0.347208	0.425264	0.213524	0.381518	1.55213	0.278163	0.963359	0.303421
ENSMUSG00000104376	RP23-191P7.1	21.3004	-0.0445875	0.267967	0.6749	0.857806	19.2797	-0.0188743	0.152029	0.550326		24.1432	-0.0964189	0.401005	0.69671	0.824938	10.0846	0.37508	0.754079	0.43857	0.607358
ENSMUSG00000038576	Susd4	44.4926	-0.00226817	0.244653	0.983872	0.99371	40.5083	-0.0114188	0.147683	0.788343		43.6876	-0.23451	0.366278	0.372068	0.562993	7.70479	0.321306	0.799849	0.492423	0.654161
ENSMUSG00000102291	RP23-160F6.1	16.4102	-0.0308572	0.27131	0.747196	0.893194	13.1353	-0.0221221	0.154155	0.367711		13.1486	-0.620324	0.788776	0.0538979	0.1335
ENSMUSG00000079164	Tlr5	66.7892	0.627821	0.489701	0.0146487	0.0756728	45.2303	0.0188444	0.148869	0.659767		55.6011	0.204492	0.347617	0.430697	0.618675	14.254	0.928035	1.08615	0.0984627	0.22013
ENSMUSG00000094807	Gm24975	12.7368	-0.0890229	0.292819	0.304257	0.58144	11.4753	-0.0277769	0.155647	0.244554		18.7084	0.0150191	0.416928	0.951958	0.975464	2.00831	0.0861191	0.889949	0.767296
ENSMUSG00000030768	Disp1	283.468	-0.300014	0.185547	0.0449523	0.171338	306.126	0.0077182	0.119741	0.917087	0.969632	330.615	-0.224406	0.172692	0.165117	0.315922	30.287	0.958591	0.674456	0.0641682	0.162833
ENSMUSG00000102478	RP24-268A16.1	5.1294	0.0447933	0.286946	0.45386		5.74515	0.0176897	0.154368	0.310924		4.16078	0.0269748	0.479473	0.865896
ENSMUSG00000118599		14.1748	0.11669	0.303471	0.221557	0.484491	12.1965	0.0209108	0.15392	0.394893		13.1211	0.139605	0.459601	0.531975	0.705612	2.23205	0.628467	1.22795	0.0536297
ENSMUSG00000046836	Brox	2976.5	-0.360243	0.103855	0.000208059	0.00250365	2955.73	-0.182825	0.101539	0.0255574	0.142551	3231.96	-0.471736	0.0985911	1.01023e-06	8.75199e-06	410.802	0.0703369	0.267824	0.786412	0.872286
ENSMUSG00000042901	Aida	1430.6	-0.0828926	0.102907	0.387106	0.660207	1366.81	-0.0462747	0.0900532	0.526771	0.788871	1547.04	-0.188344	0.0981155	0.0500309	0.125626	224.976	0.582919	0.36542	0.082932	0.19514
ENSMUSG00000056050	Mia3	597.825	-0.299542	0.139246	0.0148623	0.0764652	539.107	-0.42798	0.159674	0.000651401	0.0100615	645.93	-0.43976	0.138416	0.00091691	0.00418167	107.75	0.0236493	0.357393	0.945373	0.96906
ENSMUSG00000103415	CAAA01083517.1	3.40645	0.0490116	0.291119	0.275219
ENSMUSG00000072258	Taf1a	1171.13	-0.00996041	0.126414	0.926879	0.974914	1255.88	0.266595	0.11663	0.00436835	0.0414615	1514.91	0.366699	0.103786	0.000298646	0.00155026	365.475	-1.83001	0.334426	8.65744e-09	3.33749e-07
ENSMUSG00000104212	CAAA01187608.3	14.2795	0.230948	0.415977	0.0283149	0.122189	4.73504	-0.00379128	0.153061	0.808287		23.1455	2.1389	0.829021	0.000614294	0.00293256	3.94859	0.332147	0.85323	0.451183	0.619048
ENSMUSG00000053461	Hhipl2	75.6085	1.29007	0.463228	0.000287252	0.00327227	38.8334	0.0144009	0.149008	0.722771		124.349	2.1438	0.351829	1.03719e-10	1.62842e-09	11.6424	-0.0523691	0.678632	0.908035	0.949208
ENSMUSG00000104022	CAAA01187608.2	5.14029	0.0927369	0.30538	0.0972833							7.9142	0.707366	1.28876	0.0214541	0.0627209	4.35519	-0.538728	0.958914	0.23333	0.400118
ENSMUSG00000103451	RP24-411K2.1	51.3982	-0.0404964	0.243232	0.758853	0.898098	40.315	-0.0710125	0.169736	0.129503		51.5338	-0.287752	0.357983	0.277062	0.458933	63.8795	0.446809	0.658396	0.360082	0.533729
ENSMUSG00000103305	RP23-352D14.1	53.0337	0.0253178	0.239774	0.852392	0.942957	45.1377	-0.022154	0.148519	0.622075		46.7194	-0.429304	0.404451	0.132237	0.268588	4.31318	0.367652	0.886847	0.391556	0.563873
ENSMUSG00000039384	Dusp10	718.619	-0.0521091	0.120945	0.632592	0.83462	672.106	-0.0534126	0.109635	0.497298	0.769995	822.465	0.00560981	0.119805	0.962624	0.981031	338.985	-0.953242	0.338114	0.00244477	0.0138431
ENSMUSG00000044854	1700056E22Rik	21.2651	0.0223136	0.267331	0.829304	0.933538	20.7972	0.0102407	0.150792	0.751866		24.1173	0.0705743	0.403143	0.778298	0.878248	8.91452	1.16842	1.0646	0.0589687	0.153814
ENSMUSG00000101574	1700112H15Rik	4.85672	0.0464928	0.288729	0.379954		2.90262	0.00173569	0.153303	0.892838		4.08486	0.0693374	0.488198	0.642615		3.04338	-0.355693	0.953202	0.305584	0.47888
ENSMUSG00000102606	RP24-286C21.2	3.0051	0.00999512	0.284706	0.830566		3.22283	0.00494171	0.153369	0.709448		3.21645	0.021506	0.485327	0.880315		2.79787	0.863469	1.5461	0.0266016	0.0859709
ENSMUSG00000039377	Hlx	22.1399	-0.162538	0.321965	0.162549	0.399909	20.2332	-0.0535056	0.163915	0.108935		24.3663	-0.523674	0.550913	0.0939628	0.206219	1.92467	0.166563	0.909757	0.551672
ENSMUSG00000026621	Marc1	11.1713	2.41987	1.33431	0.00257537	0.0195063						23.8346	3.95251	0.932061	3.18248e-06	2.52106e-05	3.18828	0.232997	0.927268	0.423633	0.593931
ENSMUSG00000073481	Marc2	500.813	-0.068873	0.140484	0.573435	0.799246	482.616	-0.0163183	0.112178	0.830936	0.938605	547.83	-0.141007	0.145212	0.310156	0.498473	475.666	-0.15793	0.360977	0.63285	0.764811
ENSMUSG00000039349	C130074G19Rik	327.274	1.06486	0.196522	5.05187e-09	2.3573e-07	231.274	0.201981	0.230282	0.0528391	0.228314	460.367	1.55782	0.175221	7.51606e-20	3.06635e-18	57.4704	-1.63477	0.739964	0.00477804	0.0234168
ENSMUSG00000026620	Mark1	17.3952	0.0410107	0.274341	0.665475	0.853172	16.0837	0.00920692	0.151498	0.747485		33.2589	1.09133	0.618258	0.00814823	0.0280087	24.9885	-8.91219	2.92953	3.89593e-09	1.65927e-07
ENSMUSG00000039318	Rab3gap2	7347.19	-0.369141	0.0948354	3.81827e-05	0.000616564	7340.47	-0.185797	0.0812227	0.00865717	0.0680567	6686.91	-1.18967	0.0921673	6.41349e-39	9.23585e-37	157.024	0.0209054	0.376897	0.954306	0.974849
ENSMUSG00000103613	RP23-321A12.2	20.2002	0.122833	0.297087	0.270637	0.545562	14.0082	-0.00165042	0.151223	0.949528		12.5955	-0.27806	0.519518	0.240712	0.415724	3.3925	0.658012	1.10279	0.142904	0.285487
ENSMUSG00000026618	Iars2	168.78	-0.211493	0.215839	0.177545	0.42316	167.553	-0.0537421	0.14043	0.448598	0.738131	197.978	-0.156691	0.209446	0.409819	0.599646	31.7655	-1.27558	0.566351	0.00732765	0.0324195
ENSMUSG00000026617	Bpnt1	46.3408	0.0919476	0.256602	0.497227	0.750948	41.916	0.0171851	0.148036	0.698872		50.3324	0.142202	0.338966	0.578352	0.742019	25.2853	0.102911	0.532432	0.816448	0.892003
ENSMUSG00000097261	4930532G15Rik	7.29973	-0.00418979	0.279162	0.949427		6.08866	-0.00736717	0.152923	0.691312		6.20318	-0.160412	0.49936	0.385958		10.7214	0.145797	0.728514	0.757428	0.853367
ENSMUSG00000026615	Eprs	1738.46	0.389708	0.10634	8.85293e-05	0.0012381	1508.13	0.1402	0.103203	0.0838837	0.303071	2223.94	0.729611	0.0994358	7.47103e-14	1.69757e-12	758.342	-0.235022	0.381903	0.503697	0.663089
ENSMUSG00000026614	Slc30a10	5.20108	0.0727086	0.295916	0.21331							14.5556	2.59765	1.08368	0.00102806	0.00463511
ENSMUSG00000102185	RP24-170O7.1	3.30659	0.000318285	0.284383	0.996993		3.8615	0.00567878	0.153259	0.701659		4.83359	0.0877043	0.487207	0.587857
ENSMUSG00000103799	RP24-71M17.1	40.2811	-0.0608706	0.255975	0.628509	0.832403	37.2378	-0.0244198	0.150009	0.564223		35.6326	-0.717965	0.531835	0.0354087	0.0951274	29.0329	2.11508	0.821937	0.0012616	0.00826206
ENSMUSG00000039246	Lyplal1	528.168	-0.371988	0.154688	0.00556863	0.0360221	525.778	-0.111066	0.150001	0.192297	0.485235	512.109	-0.93589	0.157778	6.49204e-10	9.20871e-09	291.989	1.31891	0.294727	2.68712e-06	5.19556e-05
ENSMUSG00000039239	Tgfb2	11541.6	-0.162154	0.0843319	0.0433918	0.167191	11529.2	-0.0108546	0.0692466	0.863203	0.950406	11874.9	-0.434787	0.0705535	4.65092e-10	6.71988e-09	3625.01	1.53996	0.349363	2.98393e-06	5.7104e-05
ENSMUSG00000102619	RP24-276N20.3	7.03868	-0.00286338	0.279864	0.9631		7.49592	0.004475	0.152516	0.82994		7.4726	-0.035393	0.463293	0.849936	0.9211
ENSMUSG00000001305	Rrp15	350.398	0.0199661	0.152872	0.87894	0.954802	353.667	0.0906082	0.135758	0.274377	0.586635	429.425	0.254837	0.157736	0.0884149	0.196704	486.11	-1.01979	0.54801	0.0256467	0.0834959
ENSMUSG00000097784	A430105J06Rik	38.7022	0.0585477	0.25621	0.644286	0.842076	36.7839	0.0203192	0.149414	0.630165		33.3557	-0.276637	0.411255	0.306455	0.494682	19.7633	-3.96585	1.17697	6.26712e-05	0.000721529
ENSMUSG00000104312	RP23-429I18.2	18.1179	-0.0153946	0.271978	0.864136	0.94916	19.3376	0.00756486	0.150657	0.813154		22.3676	0.0418959	0.401184	0.867254	0.931043	1.47431	0.187	0.923403	0.497891
ENSMUSG00000039224	D1Pas1	1233.4	-0.0395015	0.125514	0.725564	0.88326	1296.21	0.182406	0.109894	0.0334598	0.170449	1557.09	0.276989	0.0986104	0.00414215	0.0157302	352.836	0.161222	0.326875	0.599472	0.741145
ENSMUSG00000026611	Spata17	17.3179	0.0909385	0.286674	0.37137	0.64617	12.3398	-0.00222976	0.151654	0.926803		14.6461	-0.0192506	0.427118	0.930642	0.965034	2.57284	-0.433978	0.961165	0.268127
ENSMUSG00000039210	Gpatch2	1253.5	-0.175038	0.11152	0.0874749	0.268299	1263.98	-0.00490784	0.0912056	0.945805	0.980998	1336.8	-0.333548	0.103044	0.000918638	0.00418751	149.767	-0.605728	0.36679	0.0714965	0.175844
ENSMUSG00000104394	RP23-306B14.3	262.773	-0.252692	0.189022	0.0904438	0.274441	260.694	-0.0767397	0.137162	0.332055	0.641636	297.839	-0.268737	0.179854	0.108439	0.230454	64.5354	-0.313909	0.529973	0.470581	0.636139
ENSMUSG00000103923	RP23-349L18.1	2.98862	0.00534064	0.284575	0.908908							2.69737	-0.0287491	0.490111	0.818215		2.63473	0.242775	0.953938	0.324736
ENSMUSG00000026610	Esrrg	1891.83	-0.320301	0.109959	0.00163706	0.0137301	1858.53	-0.183205	0.096732	0.0209961	0.124619	2073.99	-0.413225	0.102991	7.24805e-05	0.000436227	412.802	0.945877	0.323544	0.00183975	0.0110497
ENSMUSG00000104482	RP23-15D21.1	10.8244	-0.08381	0.291748	0.3196	0.59722	9.18086	-0.0278758	0.156134	0.188997		9.75269	-0.629549	0.920655	0.0404106	0.106075	1.59233	0.403376	1.04578	0.134055
ENSMUSG00000026609	Ush2a	1179.05	-0.0478562	0.104617	0.622395	0.829054	1068.81	-0.126248	0.108795	0.126121	0.385688	1204.16	-0.31923	0.108029	0.00243232	0.00987876	201.685	0.738015	0.516047	0.0913169	0.208544
ENSMUSG00000026608	Kctd3	11175.9	0.0482882	0.0737707	0.498919	0.752031	11059.8	0.153762	0.0717042	0.0168029	0.107595	11810.8	-0.107769	0.0711322	0.122223	0.252684	1275.55	0.554543	0.248913	0.0206859	0.0715304
ENSMUSG00000037624	Kcnk2	25.5224	0.0481297	0.26511	0.671657	0.856454	25.9501	0.0254449	0.15221	0.486149		27.9064	0.0871975	0.38741	0.73268	0.849986	6.04252	-0.10857	0.759471	0.806579	0.885507
ENSMUSG00000102824	RP23-411B11.2	12.9434	0.0372369	0.275812	0.678297	0.859236	13.7292	0.0205264	0.153321	0.454523		17.2091	0.250037	0.474939	0.322851	0.512326	3.98459	-0.0110699	0.831793	0.973979	0.985789
ENSMUSG00000093791	Gm24092	38.4499	-0.287496	0.386641	0.0829547	0.259173	34.0965	-0.0889909	0.186506	0.0431151		38.2798	-1.05721	0.538328	0.00600474	0.0215966
ENSMUSG00000026605	Cenpf	18745.6	-0.15502	0.0978498	0.0897184	0.272778	18740.3	-0.00650949	0.0778857	0.919709	0.970403	20891.8	-0.174257	0.0943707	0.0596569	0.14483	997.93	0.380815	0.287369	0.163939	0.312842
ENSMUSG00000026604	Ptpn14	243.455	0.172637	0.184997	0.235785	0.501905	215.854	0.0260532	0.128235	0.721544	0.892569	282.206	0.315865	0.194936	0.0787856	0.18009	17.5327	0.325879	0.583396	0.480447	0.64463
ENSMUSG00000026603	Smyd2	33.8526	0.0579492	0.260451	0.634583	0.835887	25.699	-0.0211367	0.151596	0.54418		33.4998	-0.035069	0.367451	0.887297	0.942011	4.60598	0.489729	1.06066	0.147	0.290935
ENSMUSG00000010175	Prox1	161.199	-0.228569	0.220237	0.150443	0.382075	160.881	-0.0532229	0.140622	0.450843	0.739872	169.635	-0.485435	0.265037	0.033101	0.089939	5.02311	0.331179	0.855575	0.443521	0.61231
ENSMUSG00000103510	RP24-240P15.2	522.519	-0.0198792	0.140173	0.869402	0.950651	511.517	0.0325128	0.115147	0.670626	0.865176	496.186	-0.514346	0.17063	0.00131522	0.00575556	22.1831	1.3317	0.768414	0.0209334	0.0721857
ENSMUSG00000093064	Gm23153	12.1916	0.0606713	0.283218	0.475438	0.733061	14.7152	0.0352293	0.157521	0.180913		11.1516	0.0281386	0.445467	0.897387	0.947005
ENSMUSG00000089872	Rps6kc1	104.976	-0.0222567	0.209425	0.87361	0.952113	109.668	0.0481363	0.145307	0.455612	0.744119	118.976	-0.0079808	0.249506	0.968931	0.984276	5.3118	-0.172139	0.811	0.68016	0.798954
ENSMUSG00000026634	Angel2	11581.5	-0.173001	0.0782444	0.0211541	0.0990795	11752.8	0.018724	0.0674318	0.758315	0.909273	12433.6	-0.305221	0.0700449	1.05573e-05	7.54662e-05	4090.68	1.03157	0.264335	4.64175e-05	0.00056465
ENSMUSG00000037568	Vash2	44.2086	1.32478	0.542354	0.000699007	0.0068252	21.0706	0.00614433	0.150241	0.854682		97.2302	2.73784	0.373445	2.06285e-14	4.96201e-13	23.5543	0.628125	0.717074	0.216979	0.380141
ENSMUSG00000104487	RP23-399N18.3	3.93937	0.0666518	0.296357	0.142544		2.85227	0.0115001	0.15408	0.299046		6.05127	0.390605	0.704302	0.0421697
ENSMUSG00000103723	RP23-399N18.2	2.65632	0.0511218	0.292947	0.157531							3.82448	0.25112	0.581706	0.0744602
ENSMUSG00000103964	RP23-399N18.1	20.356	0.888827	1.40933	0.0101105	0.0575232	8.74822	0.00266121	0.152227	0.906015		32.9257	2.17455	0.673321	7.65764e-05	0.000457963	4.32812	-0.026977	0.835809	0.939566	0.965996
ENSMUSG00000066595	Mfsd7b	252.344	0.846018	0.23014	2.34753e-05	0.000407477	180.731	0.083921	0.151112	0.273056	0.584761	429.337	1.74835	0.184751	3.34635e-22	1.6844e-20	213.393	-0.18762	0.298759	0.505746	0.664928
ENSMUSG00000097845	A230020J21Rik	10.9052	0.250021	0.457313	0.0113798	0.0627451	5.48156	0.0194434	0.154729	0.256167		17.9808	2.75336	0.969633	0.000299629	0.00155426	6.31184	-0.305598	0.786689	0.509506	0.667805
ENSMUSG00000057072	Spata45	9.83456	0.15063	0.335402	0.0662294	0.223692	6.55984	0.0191191	0.154437	0.311324		12.0492	0.77141	1.06526	0.0321004	0.0876582	3.45788	0.0337425	0.838604	0.931399	0.961642
ENSMUSG00000026632	Tatdn3	109.844	1.05112	0.321217	7.50969e-05	0.00107444	75.5657	0.08265	0.168788	0.181055	0.471523	146.586	1.47839	0.283234	2.05534e-08	2.33875e-07	37.3247	-3.64262	0.791463	3.67497e-07	9.37394e-06
ENSMUSG00000062510	Nsl1	73.9417	1.50017	0.403528	1.16295e-05	0.000222068	47.633	0.106211	0.198271	0.0536619		71.3721	1.19333	0.416621	0.000526214	0.002561	97.6118	-1.02563	0.424358	0.00692606	0.0310692
ENSMUSG00000103576	RP23-399N18.7	4.24555	0.022154	0.283986	0.690579							3.00456	-0.0569813	0.49067	0.675244
ENSMUSG00000026630	Batf3	15.1628	-0.0410988	0.274002	0.662207	0.851446	19.4818	0.0233564	0.152816	0.471594		20.6002	0.0822714	0.409523	0.739919	0.855462	3.31156	0.07023	0.786708	0.872288	0.927395
ENSMUSG00000102777	RP23-399N18.9	3.73918	0.0753522	0.300443	0.0717814							3.80341	0.23849	0.573297	0.0801373		3.66174	3.39517	4.26028	0.00860859	0.036656
ENSMUSG00000026628	Atf3	46.5044	-0.183074	0.30323	0.204434	0.459972	49.1137	-0.0269813	0.148844	0.564403		62.8357	-0.0133538	0.313339	0.954564	0.977168	23.1486	2.58096	1.11328	0.00177343	0.010755
ENSMUSG00000103174	RP24-443M8.2	2.5208	0.0277199	0.287648	0.481587							3.15005	0.10911	0.506447	0.394661
ENSMUSG00000026627	Tmem206	72.7082	0.0412283	0.230743	0.770204	0.905154	72.8801	0.0416636	0.148881	0.458548	0.744881	93.8873	0.378161	0.297301	0.123132	0.25388	73.6415	1.30579	0.573343	0.0067245	0.0303691
ENSMUSG00000026626	Ppp2r5a	400.766	-0.0533121	0.145049	0.665648	0.853239	394.007	0.0158939	0.118441	0.836324	0.939876	466.104	0.0403861	0.148099	0.776752	0.877446	169.214	1.10557	0.333619	0.000407229	0.00330754
ENSMUSG00000103433	RP23-103B18.6	3.70524	0.0469925	0.289526	0.351306
ENSMUSG00000103114	RP23-103B18.8	4.89743	0.0287102	0.284987	0.601322		2.9895	-0.00348374	0.153315	0.787603		5.41413	0.0928311	0.484823	0.584665
ENSMUSG00000102246	RP24-566B6.4	4.91571	0.036245	0.285349	0.538292		3.42345	0.000602735	0.153149	0.968765		9.99057	0.530701	0.794811	0.0557563	0.137057	5.60163	0.107048	0.844237	0.780565	0.868802
ENSMUSG00000037474	Dtl	1873.18	-0.124571	0.0982844	0.176111	0.421341	1991.86	0.148269	0.0976609	0.0592775	0.245008	2303.36	0.134126	0.0925685	0.14048	0.280972	670.624	-1.35448	0.300194	2.09863e-06	4.19211e-05
ENSMUSG00000037461	Ints7	246.691	0.228203	0.188952	0.12567	0.339341	283.425	0.660998	0.234466	0.000259704	0.00493064	411.585	1.19933	0.170616	3.35415e-13	6.98621e-12	254.592	-0.790852	0.413304	0.0325286	0.099296
ENSMUSG00000026623	Lpgat1	1330.04	0.00520116	0.105485	0.958802	0.985493	1261.89	0.00740976	0.0917557	0.919755	0.970403	1451.1	-0.0611845	0.103317	0.544183	0.714224	290.348	-0.595382	0.344491	0.0612735	0.15754
ENSMUSG00000102840	RP23-355E19.1	18.7065	0.00205039	0.266991	0.986314	0.994544	16.6837	-0.00615076	0.150991	0.83337		23.9249	0.149853	0.411501	0.556993	0.724391	12.3489	0.317233	0.629529	0.505123	0.664388
ENSMUSG00000026622	Nek2	3276.66	-0.404394	0.104355	3.58785e-05	0.000585675	3533.44	-0.0151178	0.0879864	0.833116	0.939287	4087.99	-0.0796796	0.0998694	0.415355	0.604995	933.376	-0.398063	0.271378	0.123914	0.258603
ENSMUSG00000055833	1700034H15Rik	173.561	0.522162	0.254022	0.00677106	0.04212	117.057	-0.0510773	0.146985	0.423369	0.720724	174.272	0.336925	0.227744	0.09775	0.212727	228.648	-4.60346	0.723419	1.35286e-11	1.0718e-09
ENSMUSG00000037434	Slc30a1	1250.87	-0.0038013	0.125341	0.971967	0.989356	1258.27	0.0975903	0.115438	0.238849	0.544935	1953.44	0.818415	0.120313	3.2856e-12	6.1911e-11	401.535	0.453386	0.456288	0.257466	0.426987
ENSMUSG00000049353	Rd3	67.2637	-0.00352371	0.228568	0.978041	0.991763	49.6116	-0.101864	0.193065	0.0635844		74.4334	-0.0291187	0.29525	0.901274	0.949387	17.1577	-4.25323	1.20264	3.63799e-05	0.000461149
ENSMUSG00000097416	Gm26670	9.79712	-0.0105171	0.276826	0.890122	0.95945	9.31783	-0.00320221	0.152183	0.883526		13.4835	0.110537	0.453397	0.619152	0.771148	2.75861	0.217716	0.919755	0.468234
ENSMUSG00000026637	Traf5	65.4545	-0.0981107	0.248079	0.484996	0.741498	45.2619	-1.17513	0.586006	0.00130696		54.4234	-1.24557	0.44928	0.000611266	0.00292003	7.5158	0.358705	0.878066	0.406199	0.577499
ENSMUSG00000103653	WI1-1003N17.1	6.26389	-0.0547043	0.287954	0.401557		6.77176	-0.00845925	0.152884	0.664638		5.68242	-0.301606	0.602038	0.0927913
ENSMUSG00000037395	Rcor3	115.669	-0.0279473	0.210552	0.844179	0.940127	108.075	-0.0175689	0.139139	0.772454	0.916777	113.974	-0.35296	0.282527	0.13522	0.27314	40.729	1.3388	0.644795	0.00980566	0.0406241
ENSMUSG00000097316	Gm10516	55.7464	0.043631	0.242192	0.747861	0.893419	49.0164	-0.00735188	0.146746	0.867127		58.3319	-0.0406146	0.317603	0.867534	0.931214	15.7666	0.419248	0.771079	0.394271	0.566356
ENSMUSG00000058248	Kcnh1	4172.4	0.00642127	0.0861189	0.936471	0.977287	4017.52	0.0435904	0.0779177	0.519615	0.785089	4520.13	-0.0809982	0.0918219	0.368851	0.559949	482.586	0.402172	0.378718	0.24381	0.411938
ENSMUSG00000037375	Hhat	191.743	-0.0465167	0.183597	0.74177	0.891511	194.562	0.0359665	0.132503	0.615717	0.837363	223.464	0.0382693	0.202255	0.838112	0.91375	40.7372	0.891115	0.525835	0.0448818	0.125416
ENSMUSG00000047384	A730013G03Rik	17.3189	0.117372	0.299002	0.257602	0.529183	12.7963	0.00732484	0.151721	0.783665		16.7224	0.156883	0.442462	0.516426	0.692976
ENSMUSG00000016200	Syt14	88.4363	0.0380717	0.219178	0.791241	0.915897	79.74	-0.00822498	0.142227	0.878443	0.957486	118.946	0.462163	0.283919	0.0539019	0.1335	35.1655	0.176129	0.540722	0.692684	0.807728
ENSMUSG00000016181	Diexf	733.405	-0.0794845	0.120816	0.465522	0.72616	777.374	0.149258	0.123072	0.0928981	0.32303	977.256	0.373816	0.115974	0.000908167	0.00414527	126.368	-0.570036	0.466242	0.159054	0.30658
ENSMUSG00000026638	Irf6	21.5357	0.17107	0.326411	0.155394	0.389447	13.7647	-0.0011684	0.151347	0.962455		18.7278	0.117382	0.432648	0.625586	0.77605	19.3912	1.20276	0.970948	0.0494832	0.134436
ENSMUSG00000079144	A130010J15Rik	45.9366	0.362221	0.44406	0.0543474	0.195073	36.5838	0.0420038	0.155357	0.328774		41.6325	0.227992	0.384809	0.392549	0.583128	29.0001	0.591486	0.640216	0.224557	0.389192
ENSMUSG00000026639	Lamb3	12.8093	-0.0258931	0.277712	0.74011	0.890757	9.99823	-0.0227643	0.154553	0.322734		13.4462	-0.123642	0.448497	0.586728	0.747576
ENSMUSG00000016179	Camk1g	11.7291	0.025797	0.276111	0.760123	0.898868	13.3747	0.020888	0.153719	0.414824		6.58002	-0.597851	1.07041	0.0197913	0.0587446
ENSMUSG00000097850	4631405K08Rik	6.09322	0.0155	0.281517	0.807361		4.70644	-0.00311434	0.153045	0.840019		9.1092	0.19853	0.501602	0.339528	0.529402
ENSMUSG00000026640	Plxna2	810.849	-0.312792	0.125829	0.00591726	0.0377378	733.446	-0.438262	0.141774	0.000180741	0.00369817	870.374	-0.465635	0.122358	8.42154e-05	0.000498168	92.2703	0.787424	0.403191	0.030434	0.0949008
ENSMUSG00000102523	RP23-288J11.1	9.53091	0.0993411	0.302103	0.196538	0.448432	11.3621	0.0401036	0.160047	0.0767974		7.93191	0.115803	0.477915	0.546621	0.716095	2.20276	0.314084	0.963306	0.29943
ENSMUSG00000102621	RP23-288J11.2	5.81514	0.0562745	0.290158	0.342267		4.12708	0.00663023	0.153246	0.670887		3.92951	0.00725654	0.480505	0.964326
ENSMUSG00000102841	RP23-288J11.3	4.15306	0.0836064	0.302475	0.0947976							2.19768	0.0824092	0.502551	0.47343
ENSMUSG00000096929	A330023F24Rik	2.94603	0.000867509	0.284379	0.987522							6.85977	0.273864	0.560566	0.174726	0.329182
ENSMUSG00000016481	Cr1l	55.7261	-0.069437	0.247133	0.606836	0.820807	63.5553	0.0367162	0.149925	0.472535	0.753053	50.8854	-0.659812	0.448741	0.0373922	0.0995096	49.2198	1.38204	0.50676	0.00178476	0.0107922
ENSMUSG00000026616	Cr2	13.8803	0.0343021	0.274447	0.708038	0.8743	12.0442	0.00211885	0.151624	0.936729		12.6021	-0.0715529	0.441136	0.745684	0.858773	1.75642	0.130193	0.884535	0.68775
ENSMUSG00000093823	Gm24802	9.34109	0.0567501	0.284428	0.471449	0.730861	14.4969	0.0541915	0.165912	0.0465768		6.19028	-0.113756	0.484691	0.527401
ENSMUSG00000050530	Fam171a1	91.3126	0.136476	0.25156	0.361639	0.637794	77.041	0.00381622	0.143836	0.942722	0.979453	96.3362	0.11287	0.310883	0.648762	0.792099	8.20069	0.203089	0.717489	0.669246	0.790832
ENSMUSG00000026643	Nmt2	651.605	-0.309354	0.147841	0.0162977	0.0817907	623.618	-0.18422	0.168024	0.0652606	0.259421	799.927	-0.0625629	0.142363	0.646365	0.790284	493.625	1.00564	0.485252	0.0170177	0.0615317
ENSMUSG00000049950	Rpp38	47.9542	0.0243939	0.244429	0.85396	0.943896	65.06	0.123454	0.21865	0.0353956	0.177008	79.2657	0.851505	0.372698	0.0046254	0.0173054	199.36	-2.46408	0.638006	1.16211e-05	0.000178098
ENSMUSG00000026644	Acbd7	68.6784	-0.0144875	0.233539	0.913676	0.969707	70.7625	0.0250389	0.14645	0.627195	0.843617	91.8324	0.320125	0.313882	0.203396	0.36851	207.411	1.70041	0.639269	0.00148432	0.00934424
ENSMUSG00000026645	Olah	1192.79	-0.0866141	0.118552	0.420962	0.690073	1165.98	-0.00256642	0.0951576	0.971566	0.990568	1187.08	-0.455691	0.113046	3.33563e-05	0.000215061	133.51	1.12942	0.578091	0.0184982	0.0655412
ENSMUSG00000026650	Meig1	8.30181	0.09492	0.301333	0.194339		8.06641	0.0265711	0.155939	0.189843		8.77613	0.24696	0.535738	0.230973	0.403576	9.43508	0.410303	0.863321	0.364844	0.537608
ENSMUSG00000026648	Dclre1c	128.508	0.290879	0.258309	0.0923634	0.278421	89.462	-0.0737438	0.160303	0.245179	0.553158	132.534	0.213867	0.25074	0.32642	0.516068	31.1356	-1.1146	1.02088	0.0622705	0.159402
ENSMUSG00000026646	Suv39h2	3518.06	-0.179378	0.0867492	0.0294032	0.125853	3341.35	-0.149378	0.0842813	0.0373504	0.183682	3900.51	-0.21263	0.0833603	0.00958139	0.0322208	554.273	0.999197	0.294112	0.000341587	0.00287115
ENSMUSG00000109865		687.19	-0.224003	0.128913	0.0517762	0.188795	637.623	-0.231738	0.145103	0.0227686	0.131721	779.322	-0.201349	0.124047	0.0934149	0.205224	838.012	-0.331483	0.476217	0.416059	0.586974
ENSMUSG00000051396	Hspa14	146.571	0.729103	0.300929	0.0014932	0.0127488	120.439	0.147331	0.219307	0.0697241	0.270561	192.873	1.16051	0.281611	5.57304e-06	4.22103e-05	317.976	0.724715	0.313121	0.0137987	0.0525855
ENSMUSG00000039496	Cdnf	26.7018	0.267443	0.4235	0.05665	0.200746	18.906	0.0262154	0.153786	0.399754		35.8577	1.26212	0.600528	0.00325491	0.0126956	5.57672	-0.627717	1.01238	0.182177	0.336977
ENSMUSG00000026655	Fam107b	2094.65	-0.307987	0.0963873	0.000697531	0.00682038	2198.04	-0.00861477	0.0843137	0.901844	0.963248	2356.94	-0.297273	0.0909183	0.000871349	0.00399315	770.046	1.30931	0.30164	5.02436e-06	8.74679e-05
ENSMUSG00000081070	Gm13181	7.46391	-0.0318152	0.281663	0.647156		7.27659	-0.00776765	0.152755	0.697567		8.4703	-0.0969998	0.466672	0.625489	0.77605
ENSMUSG00000085656	Gm13180	59.1454	0.0844141	0.24988	0.541237	0.780508	63.5026	0.0809387	0.171049	0.157694	0.436767	63.2495	0.0767029	0.313091	0.757412	0.866154	115.754	2.18399	0.69529	0.000212795	0.00193543
ENSMUSG00000086445	Gm13191	161.02	-0.212717	0.218365	0.176884	0.422427	174.478	0.0180626	0.131418	0.796186	0.926015	174.845	-0.377224	0.227686	0.0631049	0.151353	67.3525	-1.12839	0.548361	0.0143856	0.0541945
ENSMUSG00000026657	Frmd4a	510.496	-0.403717	0.152163	0.0024609	0.0188372	530.92	-0.0809004	0.120843	0.322256	0.632596	560.138	-0.496295	0.142862	0.000280946	0.00146855	57.1658	0.938338	0.536403	0.0380386	0.11137
ENSMUSG00000086458	Gm2639	3.66093	0.0703934	0.297526	0.135626							6.318	0.515073	0.890332	0.0279564	0.0780175
ENSMUSG00000081889	Gm13188	6.79724	0.0376523	0.283439	0.575894		2.79861	-0.0152634	0.154648	0.144946		9.79646	0.271286	0.533799	0.22691	0.398462
ENSMUSG00000104284	RP23-74F20.2	7.43831	0.0644425	0.289439	0.363144		9.69213	0.0361202	0.158576	0.108278		8.64179	0.223443	0.513036	0.294638	0.480575	2.37941	-0.0903145	0.883157	0.768001
ENSMUSG00000102517	RP23-74F20.3	11.1239	0.0292559	0.277899	0.719043	0.87985	9.12912	-0.00129136	0.152233	0.95014		15.9026	0.297726	0.504624	0.248496	0.42551	23.46	-0.271468	0.642902	0.564654	0.713371
ENSMUSG00000102816	RP23-416H10.5	3.30479	0.0027467	0.28416	0.956718		2.78279	-0.00194963	0.153314	0.87443
ENSMUSG00000086018	Gm13179	3.6657	0.0533037	0.291611	0.266776							7.72494	0.677548	1.19607	0.0232268	0.0670829
ENSMUSG00000039449	Prpf18	2480.24	-0.01353	0.0970652	0.881124	0.955662	2497.53	0.12687	0.0865478	0.0805175	0.295597	2837.67	0.0535898	0.0845943	0.525682	0.700972	764.95	-0.104356	0.276152	0.689387	0.805793
ENSMUSG00000083378	Gm13196	8.40519	0.0811259	0.294929	0.266714		5.65332	0.00657525	0.152948	0.718566		8.79545	0.225503	0.512734	0.293423	0.479411
ENSMUSG00000048186	Bend7	15.8204	0.16533	0.33362	0.119273	0.328726	10.6826	0.0116944	0.152549	0.628175		18.8959	0.633621	0.682478	0.0612836	0.147832	3.88981	1.12256	1.60959	0.0516382	0.138875
ENSMUSG00000083407	Gm13176	59.4162	0.151167	0.266315	0.30364	0.580718	51.9898	0.0230267	0.147454	0.63473		50.0266	-0.240854	0.356364	0.356467	0.547073	17.2409	0.660504	0.646819	0.182325	0.337152
ENSMUSG00000026662	Sephs1	237.544	0.148071	0.179642	0.300713	0.577821	206.452	-0.00690459	0.127455	0.921979	0.971164	265.94	0.18552	0.195806	0.303888	0.491519	190.486	-0.564095	0.505062	0.185308	0.340961
ENSMUSG00000026664	Phyh	155.381	-0.152102	0.225922	0.320121	0.597554	152.323	-0.044701	0.138659	0.519447	0.784976	180.387	-0.132409	0.215428	0.495318	0.674897	176.13	-0.745169	0.432398	0.0515499	0.13872
ENSMUSG00000069188	Gm13192	34.7394	-0.0501594	0.256664	0.682364	0.861106	35.0443	-0.00131839	0.148455	0.970783		38.977	-0.0981872	0.357385	0.698199	0.825801	5.87768	0.57039	0.89924	0.247377	0.415919
ENSMUSG00000026669	Mcm10	1805.56	0.331453	0.0993116	0.00038367	0.00413827	1829.48	0.490078	0.105643	3.25311e-07	2.12926e-05	2345.55	0.710861	0.0893769	6.63266e-16	1.88041e-14	214.267	-1.34862	0.341397	2.48895e-05	0.000336766
ENSMUSG00000026672	Optn	492.689	0.101303	0.137641	0.402918	0.674696	465.645	0.0624393	0.117171	0.435508	0.728737	497.089	-0.158543	0.155322	0.281469	0.464488	41.8939	1.01859	0.486715	0.0161159	0.0591285
ENSMUSG00000026676	Ccdc3	54.0832	-0.0392846	0.239915	0.769387	0.904467	65.9519	0.0854085	0.173157	0.149181	0.423926	63.1104	0.00157431	0.312034	0.99696	0.998429	16.8194	0.746428	0.898317	0.1641	0.313072
ENSMUSG00000039145	Camk1d	1600.87	-0.132366	0.110964	0.193413	0.444227	1593.67	-0.000597614	0.0902118	0.994211	0.997832	1760.02	-0.193359	0.105793	0.0610706	0.147455	247.419	0.52737	0.46899	0.196327	0.354715
ENSMUSG00000039128	Cdc123	154.768	0.231296	0.222771	0.149044	0.380084	137.022	0.0479051	0.141586	0.484371	0.760548	147.403	-0.0537414	0.231672	0.792698	0.887235	83.1232	0.890074	0.593115	0.0630096	0.160788
ENSMUSG00000025817	Nudt5	1512.07	0.037806	0.102033	0.692783	0.867231	1553.56	0.218514	0.106255	0.0109941	0.0810496	1419.04	-0.488332	0.102098	9.86637e-07	8.55781e-06	247.81	0.890791	0.4126	0.0166134	0.0604532
ENSMUSG00000056718	Gm13199	2.47649	0.0485217	0.292575	0.168492							4.91119	0.388216	0.719889	0.0322345
ENSMUSG00000025816	Sec61a2	284.915	0.392908	0.200702	0.0147002	0.0757898	250.2	0.108958	0.158307	0.189581	0.481451	378.335	0.84682	0.175506	3.67263e-07	3.44825e-06	283.022	0.0269489	0.42118	0.944428	0.968568
ENSMUSG00000085818	Gm13267	14.1908	0.0465108	0.276201	0.616774	0.825788	12.8469	0.00868192	0.151839	0.744051		13.5626	-0.00485677	0.431447	0.980204	0.989624	10.0932	-2.03428	1.229	0.00931733	0.0390072
ENSMUSG00000025815	Dhtkd1	638.045	-0.132271	0.128719	0.250141	0.520325	675.659	0.0984724	0.115156	0.235286	0.541081	822.581	0.22572	0.140737	0.0944418	0.207062	360.641	-1.0397	0.349474	0.00134572	0.00865529
ENSMUSG00000043241	Upf2	1712.43	-0.0581726	0.0991162	0.530983	0.774387	1803.06	0.184838	0.100052	0.022913	0.132221	2292.7	0.413437	0.0927978	5.67276e-06	4.2876e-05	234.938	-0.39306	0.309896	0.176947	0.330045
ENSMUSG00000045319	Proser2	107.277	0.594834	0.337617	0.00894141	0.0522468	82.8961	0.0587563	0.153795	0.331284	0.641085	157.229	1.31858	0.264613	8.04409e-08	8.45835e-07	67.5573	-2.36253	0.552952	2.29112e-06	4.52345e-05
ENSMUSG00000082332	Gm13384	9.64294	0.0964964	0.299719	0.227492	0.49222	4.00298	-0.0102616	0.153619	0.487019		10.6858	0.290738	0.538845	0.215759	0.384215	2.03458	0.133666	0.900586	0.644138
ENSMUSG00000102887	RP23-413M3.5	2806.5	-0.17712	0.0893632	0.0364396	0.147226	2802.94	-0.0230357	0.0793948	0.73391	0.899764	3218.29	-0.111703	0.0825777	0.170038	0.322784	748.114	1.13498	0.281312	2.3684e-05	0.000323462
ENSMUSG00000039063	Echdc3	618.409	0.0280573	0.132316	0.812336	0.925597	605.597	0.069473	0.118386	0.390128	0.692639	614.872	-0.297073	0.136281	0.0231791	0.0669806	171.372	-0.111215	0.357609	0.734296	0.83693
ENSMUSG00000087125	A230108P19Rik	5.82002	-0.0794572	0.297602	0.19891		8.37948	-9.94002e-05	0.152326	0.993416		10.0326	0.0149928	0.451391	0.944692	0.970627
ENSMUSG00000039046	Usp6nl	537.377	-0.0902395	0.134084	0.44609	0.711361	531.84	0.00937052	0.108397	0.904304	0.963599	612.376	-0.0496716	0.135106	0.702859	0.828486	76.8517	0.784284	0.376452	0.0228225	0.0770098
ENSMUSG00000086109	Gm13391	198.863	-0.23721	0.204038	0.125115	0.33831	188.422	-0.115312	0.168054	0.16095	0.441725	206.031	-0.530175	0.223469	0.00847332	0.0289979	60.7264	1.23135	0.472102	0.00317301	0.0169244
ENSMUSG00000002107	Celf2	2134.51	-0.117307	0.0963798	0.194943	0.446107	2000.29	-0.121739	0.0902573	0.101063	0.338697	2293.8	-0.242915	0.100288	0.0132564	0.0422793	547.1	0.417331	0.416053	0.264749	0.435023
ENSMUSG00000087079	Gm13389	3.90425	0.036498	0.288534	0.395023							2.51784	0.0303768	0.490596	0.812468		3.80118	0.33123	1.01899	0.0811688	0.191836
ENSMUSG00000065824	Gm26315	18.3251	0.0448567	0.271922	0.657492	0.848655	15.7028	0.00132881	0.150947	0.966145		19.1999	0.0489615	0.411489	0.841838	0.915761
ENSMUSG00000085070	Gm13211	35.2471	-0.0262369	0.254367	0.828273	0.933318	37.1996	0.0152713	0.148725	0.714714		31.9165	-0.437862	0.473524	0.138903	0.27865	21.2174	1.41361	0.873732	0.0213928	0.0733237
ENSMUSG00000085580	1700061F12Rik	27.4996	-0.0911299	0.275637	0.434666	0.701595	27.5389	-0.0163941	0.150409	0.650235		26.3556	-0.549158	0.555392	0.0836566	0.188705	15.7347	0.439235	0.748402	0.376825	0.548757
ENSMUSG00000079604	Gm13219	44.7714	0.0352109	0.24696	0.788533	0.914767	47.831	0.0449219	0.15463	0.346614		48.6536	0.0157827	0.336059	0.952087	0.975464	9.29629	0.159946	0.681069	0.737566	0.839335
ENSMUSG00000015619	Gata3	155.87	-0.080043	0.196044	0.580791	0.804744	145.623	-0.0499112	0.141416	0.491623	0.76635	158.301	-0.374332	0.26313	0.0964684	0.210381	77.4052	1.70533	0.49092	0.000108402	0.00112101
ENSMUSG00000025783	4930412O13Rik	2.30711	0.0196248	0.286794	0.604547							2.37877	0.0587084	0.494897	0.637796
ENSMUSG00000075534	Gm13262	4.06662	0.0195695	0.284199	0.713576		4.10699	0.007002	0.15332	0.643742		3.46055	-0.01257	0.483676	0.927884
ENSMUSG00000025782	Taf3	10921	-0.089486	0.0744954	0.212297	0.471614	10151.3	-0.126647	0.0720204	0.0461921	0.210882	12506.4	-0.0226565	0.0693127	0.740052	0.85548	1068.71	0.228531	0.317099	0.445042	0.613684
ENSMUSG00000103570	RP23-393G10.4	9.61252	0.00238627	0.276733	0.978277	0.991763	10.8302	0.0122292	0.152546	0.618357		9.12689	-0.105636	0.463718	0.607723	0.762532	4.61997	-0.547979	0.939273	0.240898	0.408867
ENSMUSG00000025781	Atp5c1	826.593	0.290772	0.129226	0.0122068	0.0659201	699.765	0.0171689	0.102647	0.823513	0.935809	836.593	0.0604504	0.123005	0.613183	0.766875	1235.21	-0.3729	0.405941	0.30719	0.48063
ENSMUSG00000037262	Kin	289.481	0.4185	0.233564	0.0180377	0.0880527	284.014	0.486132	0.22732	0.00206222	0.0238352	489.845	1.41233	0.160657	1.94338e-19	7.76818e-18	315.165	-0.156893	0.314163	0.593763	0.736583
ENSMUSG00000037254	Itih2	6.35294	-0.0548354	0.288687	0.381134		9.3201	0.00693672	0.15247	0.751707		11.2518	0.086579	0.45562	0.682746	0.815508
ENSMUSG00000025780	Itih5	24.8028	0.0253596	0.262069	0.822115	0.930047	21.0655	-0.00840778	0.15038	0.79642		30.2107	0.170034	0.393112	0.513718	0.690878	3.26961	-0.423768	0.875365	0.348557	0.523199
ENSMUSG00000086748	Gm13261	27.8181	1.35155	0.795921	0.00303282	0.0221935	15.7763	0.0287306	0.155249	0.29734		50.1918	2.55474	0.51574	5.31335e-08	5.72258e-07	16.9439	0.402168	0.749064	0.408511	0.579702
ENSMUSG00000061186	Sfmbt2	62.8595	0.419938	0.409497	0.0422382	0.16385	43.8228	0.00346817	0.147029	0.938721		61.7429	0.333311	0.360284	0.215425	0.383945	19.3378	0.791528	0.904975	0.146104	0.289743
ENSMUSG00000085257	Gm13264	4.1891	-0.0512895	0.290077	0.331902		4.47511	-0.0101292	0.153491	0.521868		8.03545	0.0765947	0.466075	0.697234	0.825108
ENSMUSG00000083900	Gm13294	4.04016	-0.0236502	0.285843	0.605495		5.13831	0.00172137	0.152939	0.91977		4.4858	-0.0820492	0.488531	0.597326
ENSMUSG00000026778	Prkcq	167.666	-0.660637	0.266442	0.00154346	0.0130747	208.838	0.0301721	0.131511	0.673857	0.867813	171.962	-1.09148	0.255343	3.06553e-06	2.43462e-05	48.3074	-1.28624	0.515199	0.00390824	0.0199925
ENSMUSG00000102992	RP23-291L24.4	15.9394	0.00291066	0.26955	0.978304	0.991763	11.1516	-0.0236692	0.154778	0.301498		13.2035	-0.267696	0.518702	0.247722	0.424652
ENSMUSG00000103223	RP23-291L24.7	4.53174	-0.00216967	0.283561	0.963143		2.75617	-0.0126321	0.154175	0.279522		9.18842	0.285074	0.546942	0.201633	0.366139
ENSMUSG00000082424	Gm13292	6.42811	0.0866522	0.301013	0.154173							3.18086	0.00252986	0.486285	0.987475
ENSMUSG00000026773	Pfkfb3	270.456	0.694442	0.228109	0.00028771	0.00327384	207.775	0.0863772	0.155226	0.251617	0.560425	464.064	1.54121	0.382648	5.37473e-06	4.08649e-05	111.136	-2.00691	0.52263	1.94685e-05	0.00027307
ENSMUSG00000102329	RP23-428M4.4	9.11829	0.172567	0.356674	0.0352902	0.143897	3.00393	0.00055235	0.153219	0.969617		6.19358	0.196339	0.520411	0.281565		2.70956	-0.380603	0.949733	0.306955
ENSMUSG00000102376	RP23-307N14.2	13.1059	0.00108866	0.274613	0.992479	0.997452	10.1441	-0.0143676	0.15318	0.513224		15.0101	0.0223771	0.436391	0.922459	0.961571
ENSMUSG00000037197	Rbm17	2637.38	-0.181477	0.090673	0.0339985	0.140009	2474.39	-0.185257	0.0909081	0.0152874	0.100338	2957.68	-0.180987	0.0840989	0.0289373	0.0802432	823.977	-1.36075	0.345343	2.57058e-05	0.000345771
ENSMUSG00000082727	Gm13260	3.78908	-0.0165616	0.284786	0.728386		3.18587	-0.00739935	0.15358	0.550692		4.52147	-0.0383663	0.482339	0.796187
ENSMUSG00000026770	Il2ra	92.9157	0.0267517	0.222394	0.852521	0.942957	94.6546	0.0461461	0.147688	0.445471	0.73615	89.5381	-0.282809	0.31964	0.261477	0.441137	22.3444	0.796132	0.636715	0.10877	0.236227
ENSMUSG00000023206	Il15ra	5.66889	0.044149	0.286633	0.460953		5.08171	0.00998658	0.153429	0.541614		5.00015	0.0525093	0.479808	0.748295		1.8775	0.252277	0.941222	0.380909
ENSMUSG00000058594	Fbxo18	6235.54	-0.306826	0.0807465	7.40703e-05	0.00106288	6253.91	-0.110831	0.0833026	0.118437	0.3713	6753.68	-0.418593	0.0762185	2.70674e-08	3.03705e-07	673.031	0.694141	0.344763	0.0301708	0.0942687
ENSMUSG00000047909	Ankrd16	57.3322	-0.0388992	0.239801	0.771824	0.905635	44.9239	-0.0827937	0.177037	0.101211		61.3415	-0.167136	0.321518	0.503064	0.681849	37.0073	0.201778	0.569919	0.660155	0.784626
ENSMUSG00000080801	Gm13310	70.8909	0.28315	0.326688	0.105769	0.304297	85.3949	0.817004	0.484959	0.00275295	0.0294884	78.586	0.435541	0.337423	0.10097	0.218254
ENSMUSG00000026768	Itga8	508.463	-0.187163	0.145204	0.136215	0.358851	477.175	-0.136602	0.145727	0.132869	0.398149	521.435	-0.48797	0.15436	0.00086158	0.00395242	116.885	0.631328	0.453054	0.11294	0.242674
ENSMUSG00000086843	E030013I19Rik	5.38748	0.0514505	0.289293	0.361445		2.67739	-0.00149244	0.153378	0.895994
ENSMUSG00000026767	Fam188a	1679.33	-0.468827	0.104235	1.82469e-06	4.53447e-05	1628.63	-0.366368	0.106692	7.38067e-05	0.00178811	1664.41	-0.939616	0.0986558	3.77986e-22	1.88516e-20	525.05	0.438386	0.329979	0.155777	0.302762
ENSMUSG00000102630	RP23-232K16.3	3.11541	0.0314652	0.286998	0.501648							2.51784	0.0303768	0.490596	0.812468
ENSMUSG00000104449	RP23-232K16.2	8.80559	-0.083791	0.294695	0.275135	0.5501	8.07257	-0.0235539	0.155146	0.248203		9.2045	-0.333705	0.579395	0.151911	0.296926	7.50618	-6.30954	3.00359	0.000196261	0.00181568
ENSMUSG00000104406	RP23-232K16.4	3.00032	0.0254305	0.286103	0.584751							3.02881	0.0522066	0.490206	0.699799
ENSMUSG00000026730	Pter	745.757	-0.296531	0.134904	0.0132861	0.0703236	745.672	-0.100461	0.113114	0.222721	0.524673	801.642	-0.446889	0.123567	0.000184086	0.0010035	182.796	1.20878	0.490946	0.00493241	0.0239723
ENSMUSG00000049630	C1ql3	10.4725	-0.080652	0.292153	0.314501	0.592152	11.768	-0.0103357	0.152172	0.67991		14.63	-0.053664	0.431293	0.812078	0.89811	2.31633	0.152389	0.920788	0.532481
ENSMUSG00000104459	RP23-415C3.6	13.0343	-0.0589707	0.28483	0.450089	0.714458	10.8127	-0.0282357	0.155947	0.219746		14.8287	-0.186165	0.459371	0.434829	0.622391	2.73469	-0.0177773	0.855955	0.956616
ENSMUSG00000103143	RP23-415C3.4	28.6739	-0.0119696	0.258247	0.914847	0.970087	31.0815	0.0209302	0.150526	0.590835		31.4849	-0.059444	0.376131	0.811559	0.897902	8.88228	1.9586	1.4393	0.0155904	0.0576758
ENSMUSG00000026727	Rsu1	605.954	-0.535416	0.143907	4.00604e-05	0.000643148	615.589	-0.21197	0.163952	0.0408838	0.194323	645.223	-0.738878	0.139379	3.72854e-08	4.09067e-07	80.5679	0.283821	0.360713	0.394303	0.566358
ENSMUSG00000102691	RP23-415C3.8	14.498	0.0219645	0.272907	0.81041	0.924786	14.1242	0.00928978	0.151715	0.733911		15.1991	0.00721522	0.426897	0.977574	0.988438	11.4313	1.07489	0.962902	0.0692236	0.172027
ENSMUSG00000086358	Gm13270	20.3424	-0.0186367	0.270427	0.841395	0.939454	13.2907	-0.0400076	0.15989	0.0856248		19.2841	-0.221262	0.463808	0.369256	0.560269	3.79133	-3.53549	4.83621	0.00809346	0.0350239
ENSMUSG00000026726	Cubn	229.063	-0.0921177	0.177529	0.512082	0.760955	226.999	-0.00135131	0.126859	0.983704	0.995255	269.287	0.00697752	0.186456	0.969328	0.984473	30.2867	0.774715	0.660904	0.124648	0.259526
ENSMUSG00000026723	Trdmt1	174.921	-0.343082	0.234949	0.0451476	0.171746	176.383	-0.083929	0.150809	0.26556	0.576604	175.675	-0.800581	0.240734	0.000235744	0.00125582	69.9088	0.224489	0.44111	0.565218	0.713853
ENSMUSG00000026728	Vim	23.3069	-0.352015	0.597975	0.0238198	0.10824	30.9374	-0.0154715	0.150188	0.67138		28.7872	-0.628912	0.594133	0.060086	0.145595	116.724	5.06822	0.525485	3.47212e-23	1.58337e-20
ENSMUSG00000003418	St8sia6	382.696	-0.245532	0.161696	0.0706991	0.23344	375.331	-0.0740924	0.136852	0.346603	0.653854	430.975	-0.257926	0.156658	0.082276	0.186286	72.295	0.614101	0.424618	0.105378	0.231141
ENSMUSG00000063275	Ptpla	15.9086	0.00607204	0.269938	0.951522	0.982808	12.542	-0.0155593	0.152708	0.547439		18.2345	0.0398796	0.416036	0.869494	0.932535	17.9221	1.92699	0.816773	0.00247649	0.0139972
ENSMUSG00000086657	Stamos	8.09632	-0.0393203	0.284403	0.541506		8.55082	-0.00555167	0.152802	0.763314		11.2406	-0.00476586	0.453376	0.977941	0.988699	5.41798	0.132048	0.867401	0.711063	0.820107
ENSMUSG00000026718	Stam	406.275	-0.430031	0.171803	0.00330642	0.0237316	404.716	-0.166097	0.168531	0.0856288	0.30712	447.272	-0.51488	0.178205	0.00195926	0.00817581	67.6414	0.659844	0.436153	0.0870747	0.202065
ENSMUSG00000061531	Tmem236	2.54386	0.0180382	0.286141	0.66267							3.24711	0.0857332	0.497697	0.524785
ENSMUSG00000026712	Mrc1	869.365	-0.188551	0.132981	0.109238	0.310617	877.076	-0.0169661	0.100813	0.822831	0.935639	911.923	-0.407983	0.125028	0.000726871	0.00340129	88.4446	1.01144	0.492708	0.0179267	0.063855
ENSMUSG00000103475	RP23-201A19.2	2.68415	0.0285738	0.287059	0.508644							3.91992	0.159532	0.519123	0.278634		4.61101	0.727129	1.08658	0.134504	0.273797
ENSMUSG00000036949	Slc39a12	11.3907	0.070938	0.287114	0.396937	0.668943	8.46879	0.00449596	0.152332	0.839456		7.96737	-0.0867393	0.468014	0.653398	0.795128	2.99736	-0.332502	0.970995	0.267713	0.438265
ENSMUSG00000084901	Gm13266	32.6263	0.0989664	0.272419	0.429536	0.697004	28.6715	0.0150424	0.149749	0.695178		25.4208	-0.2886	0.443862	0.286032	0.46999
ENSMUSG00000057914	Cacnb2	619.017	-0.615686	0.143674	3.03233e-06	7.0075e-05	693.775	-0.0583395	0.106549	0.458024	0.744851	624.866	-1.05487	0.141326	1.52344e-14	3.70552e-13	29.3607	1.42579	0.869769	0.0211093	0.0726452
ENSMUSG00000103050	RP23-446D4.8	308.793	-0.0646545	0.158776	0.624635	0.830145	283.063	-0.0743281	0.134882	0.349665	0.655975	348.224	-0.0585958	0.170228	0.713486	0.83651	19.853	0.383226	0.588579	0.410848	0.582161
ENSMUSG00000087086	Gm13269	234.911	-0.0365927	0.17125	0.789302	0.915215	211.668	-0.0642086	0.140502	0.386926	0.690269	259.394	-0.0780608	0.186718	0.651618	0.793939	64.3987	0.567078	0.45423	0.155371	0.30216
ENSMUSG00000026707	Nsun6	13.3313	-0.0806183	0.287449	0.374996	0.649516	15.5671	-0.00155018	0.151019	0.954293		15.4998	-0.18246	0.45398	0.448177	0.635224	32.5809	-0.468228	0.503535	0.270055	0.440908
ENSMUSG00000017418	Arl5b	498.769	-0.0534979	0.135493	0.654442	0.847248	452.923	-0.0973789	0.130227	0.245913	0.554259	561.294	-0.0462589	0.140334	0.730353	0.848598	252.233	0.157434	0.277378	0.553885	0.704681
ENSMUSG00000102258	RP23-379F6.3	5.46557	-0.0164252	0.282144	0.784809		5.58226	-0.00198151	0.152854	0.90546		6.68997	-0.0138435	0.464571	0.937758	0.968053	1.72858	0.115233	0.88067	0.723019
ENSMUSG00000075520	Malrd1	37.5578	-0.0700307	0.263038	0.564568	0.795177	29.5476	-0.0588469	0.165703	0.114532		39.8681	-0.243557	0.400318	0.358583	0.549305	5.19294	0.0342677	0.760737	0.940775	0.966465
ENSMUSG00000026748	Plxdc2	243.786	-0.468976	0.215153	0.00628499	0.0396799	253.158	-0.104231	0.15014	0.211655	0.50927	275.131	-0.489014	0.206265	0.00932482	0.0314662	31.4112	1.10553	0.568388	0.0198602	0.0693658
ENSMUSG00000053702	Nebl	272.217	-0.0255734	0.162735	0.847751	0.941643	266.731	0.0223179	0.12357	0.766005	0.912737	298.799	-0.085305	0.186969	0.621718	0.773281	112.656	1.23251	0.418598	0.00115948	0.00770941
ENSMUSG00000054057	A930004D18Rik	11.8603	0.191723	0.370198	0.0430129	0.16616	7.49253	0.0196272	0.154411	0.323202		11.0804	0.447132	0.661743	0.0957873	0.209231	4.43368	0.982861	1.26179	0.083411	0.195946
ENSMUSG00000054074	Skida1	63.7733	0.470618	0.415361	0.0314845	0.132003	49.7549	0.0411074	0.152505	0.40098		75.1064	0.773083	0.367623	0.00864663	0.0294889	5.57902	0.473039	0.947971	0.275055	0.445989
ENSMUSG00000026743	Mllt10	14960.9	-0.317722	0.0824285	5.48578e-05	0.000834576	15111.9	-0.107835	0.0733218	0.0949226	0.32646	14740.9	-0.773511	0.0820596	1.30266e-21	6.23929e-20	955.88	-0.076382	0.269536	0.764387	0.857871
ENSMUSG00000092814	Gm23638	5.75004	0.0194234	0.28203	0.758673		5.52582	0.00518606	0.152952	0.767561		3.79206	-0.140041	0.511152	0.328602
ENSMUSG00000026740	Dnajc1	602.497	-0.375078	0.141278	0.00279363	0.020811	603.248	-0.13703	0.137394	0.127365	0.388491	713.948	-0.220262	0.129032	0.0763337	0.175555	95.7401	0.526044	0.41907	0.161041	0.309
ENSMUSG00000082520	Gm13349	2.83094	-0.00601392	0.284595	0.893238		4.80637	0.0136368	0.153865	0.402553		3.39753	-0.00441852	0.482987	0.973107
ENSMUSG00000051154	Commd3	1503.28	0.0257233	0.101277	0.787016	0.913873	1537.99	0.195646	0.102976	0.0187256	0.115423	1403.79	-0.522725	0.103648	2.40845e-07	2.35167e-06	372.599	1.26735	0.460399	0.00199296	0.0117547
ENSMUSG00000026739	Bmi1	52246.1	-0.158318	0.0706687	0.0209498	0.098369	50601.6	-0.0803306	0.0668099	0.176888	0.467209	56774.2	-0.248299	0.0659216	0.000136634	0.000768521	5929.55	0.618879	0.287241	0.0233593	0.0782283
ENSMUSG00000037708	BC061194	7.09207	0.0183526	0.281166	0.782812		5.42223	-0.00317519	0.1531	0.831627		6.20642	-0.0562538	0.471708	0.752339	0.862849
ENSMUSG00000026737	Pip4k2a	123.433	0.0876663	0.211415	0.553702	0.788952	112.608	0.016433	0.137754	0.796771	0.926095	131.868	0.0467873	0.24367	0.828411	0.908182	27.322	0.836672	0.816336	0.122503	0.25643
ENSMUSG00000026736	4930426L09Rik	3.59575	-0.000538642	0.284505	0.987848							4.41948	0.0184744	0.479107	0.90869
ENSMUSG00000037683	Armc3	8.01988	-0.0274212	0.27998	0.705353		10.4392	0.0125948	0.152628	0.604011		11.9519	0.0960592	0.451461	0.661172	0.800022	4.15439	0.478277	1.01233	0.199273	0.358354
ENSMUSG00000023094	Msrb2	3.6866	-0.00696398	0.284022	0.883858		4.00933	0.00147613	0.153162	0.919497		4.18672	-0.017457	0.481891	0.903097		2.28073	0.38186	1.04079	0.105018
ENSMUSG00000026734	4921504E06Rik	4.65383	0.0622126	0.293089	0.247492		6.11006	0.0277221	0.156739	0.0930319		5.07452	0.19356	0.527566	0.244283		2.49443	0.349211	0.980129	0.255337
ENSMUSG00000043415	Otud1	616.652	-0.478261	0.151428	0.000384413	0.00414399	581.513	-0.464388	0.155164	0.000229906	0.00449454	651.797	-0.706229	0.136106	7.43043e-08	7.83962e-07	153.948	0.533014	0.417894	0.153777	0.299903
ENSMUSG00000087246	Gm13346	307.859	-0.0274383	0.156449	0.833192	0.935812	331.601	0.165564	0.167316	0.0883899	0.312397	325.467	-0.182892	0.171131	0.254621	0.432938	66.3894	0.971309	0.491421	0.0225616	0.0763638
ENSMUSG00000036617	Etl4	2711.23	-0.195627	0.0945858	0.0278925	0.120876	2671.69	-0.0672097	0.0822354	0.334292	0.643262	2772.66	-0.494371	0.0907156	2.85306e-08	3.18153e-07	230.008	0.705241	0.350733	0.0299857	0.0938159
ENSMUSG00000083777	Gm13361	49.8966	0.0643997	0.247075	0.634502	0.835887	63.8072	0.191822	0.333472	0.0201987	0.121408	54.9878	0.106752	0.328171	0.673387	0.808832	12.8331	0.467479	0.776212	0.349055	0.523723
ENSMUSG00000060795	Gm13363	3.71569	0.0162569	0.28404	0.756147		5.07604	0.0154835	0.154099	0.350314		3.71283	0.0138926	0.483423	0.925267
ENSMUSG00000082164	Gm13360	189.588	-0.57986	0.242939	0.00252236	0.019232	183.071	-0.397903	0.298414	0.0101393	0.0764614	203.738	-0.79126	0.228217	0.000143732	0.000804701	16.1668	-0.519229	0.843246	0.289987	0.462036
ENSMUSG00000081128	Gm13328	5.2697	0.0517987	0.28885	0.378084		2.81122	-0.00185175	0.15329	0.882838		2.94155	-0.0482206	0.490235	0.715812
ENSMUSG00000065253	Gm23970	3.66617	-0.023771	0.284901	0.642826							3.56896	-0.0999025	0.500098	0.469336
ENSMUSG00000091457	Gm17171	15.5946	-0.0857345	0.286971	0.370734	0.645526	16.3669	-0.0117629	0.151546	0.686049		13.2925	-0.852812	1.06318	0.0287289	0.0797638	5.58711	0.450073	0.88863	0.328717	0.502784
ENSMUSG00000085477	Gm13335	200.502	-0.306931	0.237238	0.0701894	0.232349	222.11	0.00673783	0.132028	0.922703	0.971377	202.451	-0.75663	0.252584	0.000781298	0.00362323	22.7138	-1.25908	0.874567	0.035025	0.104744
ENSMUSG00000036591	Arhgap21	19118.1	-0.407044	0.0755388	2.23671e-08	8.88204e-07	19258.5	-0.196126	0.0703724	0.00190329	0.0224585	20422.6	-0.575448	0.0774913	7.94473e-14	1.79956e-12	1307.49	0.352303	0.285296	0.195301	0.353557
ENSMUSG00000085206	Gm13380	5.57463	-0.0459849	0.286719	0.451295		5.01404	-0.0138899	0.153888	0.394064		6.24526	-0.144096	0.493657	0.428521	0.616648	1.93105	0.256489	0.943294	0.371614
ENSMUSG00000075514	Gm13375	215.793	0.00934633	0.176034	0.948573	0.98203	212.482	0.0400474	0.131392	0.586859	0.823949	231.187	-0.0995586	0.195977	0.58004	0.743124	5.01075	0.154141	0.849481	0.689853	0.806086
ENSMUSG00000086821	Gm13377	14.6621	0.0242253	0.275016	0.781105	0.910485	17.1772	0.0261364	0.154548	0.346237		13.9813	-0.0443084	0.436797	0.840571	0.915031	3.11827	0.313152	0.895399	0.425754	0.596101
ENSMUSG00000026679	Enkur	4.42538	0.022894	0.283827	0.685475		4.50216	0.00839185	0.153309	0.604134		5.42865	0.107693	0.487202	0.535072
ENSMUSG00000048550	Thnsl1	372.995	-0.541771	0.182288	0.000547827	0.00558095	366.277	-0.351604	0.194463	0.00669731	0.0568739	404.811	-0.683249	0.164206	1.15237e-05	8.17298e-05	149.206	0.578895	0.431261	0.129917	0.267653
ENSMUSG00000084071	Gm13378	4.92221	-0.00463213	0.282334	0.933796		6.27389	0.00930721	0.153117	0.617228		5.03237	-0.0492334	0.477905	0.764322
ENSMUSG00000085680	Gm13327	22.4783	-0.165519	0.320359	0.170498	0.413248	20.1666	-0.0433196	0.159943	0.14334		26.7208	-0.304614	0.44428	0.263888	0.443931
ENSMUSG00000045967	Gpr158	178.918	0.0761486	0.189245	0.59813	0.815815	158.769	-0.0134517	0.133199	0.840154	0.942191	198.929	0.0960197	0.209226	0.615563	0.768438	9.69798	0.171069	0.774642	0.705804	0.816407
ENSMUSG00000025716	Myo3a	310.653	0.062386	0.168119	0.649956	0.845773	390.306	0.697363	0.210996	5.40258e-05	0.00138838	410.531	0.481464	0.182277	0.00461753	0.017279	183.239	-0.431429	0.473934	0.289835	0.462009
ENSMUSG00000082516	Gm13342	3.60186	0.0546574	0.292484	0.236999		4.89186	0.0236636	0.15598	0.0972068
ENSMUSG00000083863	Gm13341	27.609	0.108832	0.283092	0.360889	0.637344	29.0584	0.0514969	0.161257	0.183006		30.4046	0.240867	0.415369	0.3686	0.55976	3.52461	0.483859	0.958811	0.264872	0.435129
ENSMUSG00000083563	Gm13340	143.412	0.176917	0.216007	0.253351	0.524492	152.946	0.145881	0.22143	0.0664307	0.262685	156.222	0.191501	0.24653	0.375677	0.566669	15.647	0.391351	0.700035	0.425936	0.596216
ENSMUSG00000082884	Gm13339	40.89	0.169636	0.297039	0.230298	0.494608	43.2345	0.0822365	0.177917	0.0891933		43.8039	0.284843	0.377599	0.291704	0.476925	2.3032	-0.118011	0.869055	0.730194
ENSMUSG00000026787	Gad2	91.9886	-0.135771	0.235189	0.368687	0.643826	95.6713	-0.00162992	0.139192	0.976233	0.992046	146.222	0.567652	0.260565	0.0126007	0.0405389	6.56308	0.786769	1.03557	0.134298	0.273615
ENSMUSG00000026786	Apbb1ip	7.60463	0.0467776	0.284382	0.509083		3.51624	-0.0139578	0.15421	0.29293		6.88727	0.0330605	0.464991	0.861614	0.927785
ENSMUSG00000026784	Pdss1	62.8344	0.090669	0.242523	0.52526	0.770117	58.8554	0.0275187	0.147107	0.592651	0.826794	83.7306	0.522881	0.345267	0.054759	0.135242	120.975	-0.0979027	0.419686	0.790247	0.874413
ENSMUSG00000058835	Abi1	4071.16	-0.475489	0.0893724	2.79319e-08	1.09356e-06	4072.19	-0.275448	0.0867294	0.000307192	0.00559033	4369.9	-0.628446	0.0854151	7.95538e-14	1.8001e-12	553.673	0.370341	0.268933	0.150696	0.295621
ENSMUSG00000083650	Gm13357	3.39384	0.0356376	0.287272	0.46665							5.86688	0.287541	0.582463	0.129583
ENSMUSG00000026781	Acbd5	4913.31	-0.226266	0.0802022	0.00247965	0.0189435	4874.6	-0.0748934	0.0848436	0.289504	0.60224	5522.18	-0.223224	0.0757912	0.00286041	0.0113752	1207.16	0.0219628	0.237975	0.928322	0.960002
ENSMUSG00000026779	Mastl	4774	-0.320302	0.0930166	0.000269923	0.00311701	4736.23	-0.166786	0.0858068	0.0307268	0.161786	5044.47	-0.520453	0.0877383	1.60427e-09	2.14149e-08	745.224	0.59848	0.295311	0.0322639	0.0986974
ENSMUSG00000026775	Yme1l1	1195.18	0.130963	0.108722	0.192734	0.443183	1149.25	0.138167	0.105197	0.0915055	0.319886	1656.36	0.678518	0.100795	6.58473e-12	1.18237e-10	1076.08	-0.135981	0.332458	0.659622	0.784289
ENSMUSG00000081648	Gm13423	8.39293	0.118634	0.314302	0.11588		3.07072	-0.004058	0.153303	0.761365		19.8563	2.50057	0.892399	0.000324749	0.0016714
ENSMUSG00000026774	4931423N10Rik	16.4455	0.361961	0.686458	0.0130037	0.0690764	6.25336	0.00262082	0.152687	0.891708		27.0753	2.36747	0.736768	9.20801e-05	0.00053999	2.06253	0.0115147	0.864162	0.974739
ENSMUSG00000084098	Gm13422	11.6739	0.00522094	0.274498	0.95311	0.98295	10.708	-0.0010235	0.151946	0.96262		18.3994	0.327907	0.503718	0.220608	0.390327
ENSMUSG00000026771	Spopl	318.764	0.350605	0.193559	0.0241113	0.109233	304.612	0.292968	0.222052	0.01919	0.117515	286.022	-0.136823	0.188963	0.433116	0.620714	72.0605	0.830941	0.540811	0.0652314	0.16486
ENSMUSG00000083373	Gm13392	2.70063	0.0330287	0.287802	0.448202							2.48387	0.0660787	0.495552	0.602048
ENSMUSG00000026986	Hnmt	343.739	-0.195406	0.163458	0.150437	0.382075	353.396	-0.00218234	0.116875	0.976751	0.992046	351.408	-0.51253	0.172361	0.00152628	0.00655131	354.548	1.53123	0.585162	0.0020942	0.012179
ENSMUSG00000061809	Tbpl2	365.801	-0.321713	0.172959	0.0251985	0.112664	381.592	-0.0383506	0.119981	0.61864	0.838658	344.76	-1.0037	0.182648	7.5227e-09	9.14647e-08	32.5144	0.783266	0.862868	0.149284	0.293651
ENSMUSG00000044103	Il1f9	3.46336	0.0109189	0.284938	0.808791		3.91612	0.00659053	0.153462	0.617643							3.8693	0.530087	1.1572	0.0368785	0.108911
ENSMUSG00000026984	Il1f6	2.64724	0.00707493	0.284854	0.875467		2.91297	0.00486561	0.153378	0.71154		2.84604	0.0105331	0.488803	0.936365
ENSMUSG00000026981	Il1rn	5.76185	-0.112903	0.318317	0.031302		5.80577	-0.0245536	0.156194	0.0825864		5.99792	-0.678774	1.80112	0.00132236
ENSMUSG00000026979	Psd4	14.6412	0.0271167	0.273486	0.768401	0.903843	11.5919	-0.00702118	0.152042	0.770838		30.911	1.15216	0.687795	0.00890487	0.0302888	15.0113	0.153097	0.626986	0.745073	0.843973
ENSMUSG00000026976	Pax8	3.80431	-0.0271592	0.285718	0.579751		4.1289	-0.00343524	0.153102	0.819939		4.87878	-0.0384286	0.476364	0.814646
ENSMUSG00000085330	Gm13417	13.3257	-0.0415851	0.276847	0.634958	0.836007	13.1423	-0.00725996	0.151694	0.78144		17.6199	0.0460713	0.417578	0.849217	0.92055
ENSMUSG00000102591	RP23-264D16.7	2157.58	0.184359	0.111998	0.0733345	0.238899	2019.2	0.12886	0.103886	0.111544	0.358806	2190.11	-0.057983	0.097876	0.545275	0.715057	563.071	0.695499	0.328977	0.0238246	0.0792472
ENSMUSG00000084241	Gm13416	12.1764	0.186992	0.363847	0.051179	0.187329	3.55502	-0.010354	0.153736	0.448493		20.4904	2.02011	0.855281	0.00111219	0.00495787	7.612	-0.605074	0.903633	0.223129	0.387646
ENSMUSG00000004113	Cacna1b	50.2911	0.243188	0.33412	0.128218	0.344423	34.6404	-0.00972694	0.148509	0.805716		106.45	1.89513	0.352521	6.55166e-09	8.06259e-08	24.494	-1.61868	1.17906	0.0206798	0.0715223
ENSMUSG00000036893	Ehmt1	1478.08	0.202683	0.106838	0.0405648	0.159199	1309.44	0.0291249	0.0937503	0.696872	0.881409	1893.93	0.560984	0.0983077	5.86148e-09	7.3e-08	297.921	-1.17384	0.34088	0.000224189	0.00201813
ENSMUSG00000102875	RP23-358I10.4	35.1501	0.131074	0.284902	0.313135	0.590784	31.5509	0.025173	0.151711	0.50709		38.466	0.254964	0.387669	0.342356	0.53217	6.92872	0.0843244	0.820982	0.837709	0.904519
ENSMUSG00000026972	Arrdc1	605.255	-0.190544	0.134121	0.107977	0.308259	617.998	0.000547196	0.104525	0.996982	0.999005	631.74	-0.428864	0.137835	0.00116992	0.00517808	461.028	-1.96718	0.301976	1.33772e-11	1.06886e-09
ENSMUSG00000026974	Zmynd19	9571.03	-0.0459614	0.0763176	0.531034	0.774398	9481.3	0.0670513	0.0686912	0.275354	0.58742	10694.7	-0.0483288	0.08158	0.543303	0.713518	622.51	-0.263004	0.436418	0.494021	0.654998
ENSMUSG00000026975	Dph7	165.756	0.637525	0.270858	0.00230398	0.0178751	137.389	0.13092	0.19553	0.102459	0.341155	220.969	1.10673	0.226095	1.68447e-07	1.68409e-06	138.68	-1.98564	0.384353	3.96628e-08	1.32424e-06
ENSMUSG00000036850	Mrpl41	172.729	0.16319	0.208586	0.285127	0.561255	191.37	0.437127	0.294828	0.00740592	0.0612695	215.385	0.478038	0.219621	0.0160409	0.0494204	450.394	-0.422298	0.466303	0.294953	0.467271
ENSMUSG00000036833	Pnpla7	231.002	0.512326	0.2226	0.00403565	0.0277198	213.921	0.351803	0.272797	0.0134961	0.0935016	314.146	1.01661	0.193457	3.00339e-08	3.34231e-07	68.5687	-1.34863	0.444676	0.000746524	0.00541628
ENSMUSG00000083796	Gm13369	2.70063	0.0330287	0.287802	0.448202
ENSMUSG00000006476	Nsmf	20.9334	0.211259	0.363506	0.0929183	0.279531	17.5266	0.0347055	0.156523	0.250305		38.7668	1.83521	0.567975	9.35466e-05	0.000547999	5.7958	0.460648	0.870169	0.330724	0.504821
ENSMUSG00000036813	Entpd8	6.04108	0.0408574	0.284806	0.528026		2.60224	-0.0117197	0.154079	0.308362		4.90789	-0.00200901	0.473952	0.987436		1.60959	-0.0109263	0.900361	0.963165
ENSMUSG00000118563		6.53231	0.0532731	0.287217	0.42555		4.94403	0.00528824	0.153021	0.755733		6.63174	0.118809	0.482522	0.527808	0.70254
ENSMUSG00000087028	Gm13387	12.5082	0.177036	0.354393	0.0597372	0.208309	6.33843	0.00653449	0.152969	0.718667		14.3582	0.718385	0.897004	0.0420063	0.109392	4.37392	-1.36528	1.62462	0.0409043	0.117425
ENSMUSG00000078202	Nrarp	32.2819	0.114159	0.277869	0.370011	0.64485	26.6242	0.00790028	0.149395	0.832141		35.1572	0.204672	0.388634	0.438482	0.6263	14.8088	0.28118	0.729126	0.559281	0.708941
ENSMUSG00000059555	Tor4a	76.6678	2.18037	0.443834	4.30433e-08	1.60141e-06	19.54	-0.0292481	0.15474	0.334839		130.776	2.9794	0.359997	6.83e-18	2.40321e-16	12.5708	-0.281849	0.723629	0.549044	0.701076
ENSMUSG00000013465	Nelfb	118.696	0.37862	0.293785	0.0464546	0.175279	96.0236	0.0327507	0.144912	0.571454	0.813997	173.368	1.10417	0.267426	6.17971e-06	4.62734e-05	127.28	-1.02067	0.353357	0.00180221	0.0108697
ENSMUSG00000064919	Gm22572	4.15434	-0.0204073	0.284413	0.693648		5.84194	0.00681567	0.15308	0.694301		6.93893	0.0817997	0.476046	0.655103	0.796089
ENSMUSG00000036770	4933433C11Rik	10.5259	0.119056	0.311193	0.154216	0.388144	7.4941	0.0140627	0.153438	0.488349		8.81483	0.155302	0.483834	0.451194	0.637739	12.1376	-1.76087	1.53088	0.0199583	0.0695547
ENSMUSG00000026969	Fam166a	13.5194	-0.0119926	0.272602	0.890412	0.95955	11.8386	-0.00845758	0.152244	0.720875		17.0475	0.0758178	0.423519	0.751388	0.86244
ENSMUSG00000036752	Tubb4b	5506.46	-0.133064	0.0839186	0.0965006	0.287155	6342.33	0.370641	0.0855037	2.01307e-06	9.28975e-05	6273.98	-0.0835646	0.0845267	0.315388	0.504495	2189	-0.585381	0.346046	0.0675325	0.16921
ENSMUSG00000006469	Slc34a3	8.12929	-0.00507539	0.278415	0.941596		8.34671	0.00230747	0.15263	0.907259		5.97677	-0.257851	0.559477	0.167434
ENSMUSG00000089953	Rnf224	10.1159	0.106671	0.30426	0.194286	0.445226	4.80367	-0.00557436	0.15305	0.736153		6.17245	-0.0291576	0.467929	0.869248		3.50373	0.223268	0.910404	0.490298	0.652142
ENSMUSG00000036731	Cysrt1	6.53618	0.0391393	0.283874	0.559387		5.41208	0.00484808	0.152887	0.787594		7.47105	0.129825	0.481231	0.507175	0.685254	7.08644	3.07322	1.82708	0.00609389	0.0281258
ENSMUSG00000044628	Rnf208	4.73506	0.0523353	0.290861	0.296003		4.3846	0.0128239	0.15404	0.341044		5.41731	0.172967	0.521298	0.266203		2.22164	0.377399	1.03787	0.109277
ENSMUSG00000006471	Ndor1	37.7751	0.364752	0.49245	0.0469385	0.176471	21.8929	-0.0073958	0.150266	0.821464		43.23	0.77265	0.507035	0.0254858	0.0722635	9.98709	-0.549014	0.739879	0.272733	0.443764
ENSMUSG00000078201	Tmem203	17.4727	-0.0232602	0.269221	0.811201	0.925069	17.4115	-0.000391501	0.150627	0.987186		15.2007	-0.326554	0.528551	0.206143	0.372215	18.5325	-0.654942	0.690859	0.192559	0.350324
ENSMUSG00000048707	Tprn	661.961	-0.131562	0.13535	0.269515	0.544562	661.456	0.00236344	0.104665	0.987629	0.996294	667.519	-0.468977	0.135945	0.000325614	0.00167466	290.403	-0.502562	0.385092	0.150686	0.295621
ENSMUSG00000026966	Ssna1	467.228	0.342592	0.156563	0.0111779	0.0618598	481.883	0.531664	0.168821	0.000118657	0.00263246	527.167	0.401588	0.148825	0.0046652	0.0174274	595.799	0.565518	0.46051	0.159415	0.306983
ENSMUSG00000026965	Anapc2	939.601	0.116377	0.119444	0.283972	0.559685	906.549	0.119785	0.117289	0.157525	0.436743	1052.47	0.137833	0.117859	0.228985	0.401005	63.317	0.227163	0.444888	0.564311	0.713141
ENSMUSG00000026961	Lrrc26	3.36691	0.0628166	0.295046	0.169462							4.80447	0.303644	0.614071	0.0759041
ENSMUSG00000026959	Grin1	13.1602	0.05739	0.27996	0.526122	0.770647	9.48143	-0.00356564	0.152532	0.856406		15.6618	0.207197	0.469868	0.390377	0.580997	5.32242	-0.573753	0.929516	0.234615	0.401633
ENSMUSG00000036646	Man1b1	438.425	-0.136319	0.153085	0.293995	0.569947	364.099	-0.460533	0.243196	0.00356142	0.0359388	513.579	-0.0380796	0.14621	0.784541	0.882603	87.7857	-1.04	0.588248	0.0301807	0.0942839
ENSMUSG00000026958	Dpp7	73.2567	0.782767	0.430974	0.00486976	0.0323951	47.6583	0.0164744	0.147288	0.720759		165.414	2.34175	0.290805	6.02038e-17	1.90005e-15	159.721	1.09418	0.489886	0.0100865	0.0414933
ENSMUSG00000026956	Uap1l1	137.666	0.150575	0.21531	0.324442	0.602675	134.398	0.0904887	0.162166	0.217155	0.517113	157.273	0.263151	0.235679	0.206926	0.373222	272.813	-0.395644	0.402923	0.274018	0.445002
ENSMUSG00000026955	Sapcd2	327.6	-0.291886	0.17603	0.0436059	0.167764	370.012	0.0717293	0.125891	0.371933	0.676206	482.399	0.390337	0.15833	0.00930991	0.0314208	336.436	-1.06417	0.323823	0.000454606	0.00361014
ENSMUSG00000015085	Entpd2	27.2342	0.0382125	0.264146	0.733517	0.887731	23.4356	-0.00181423	0.149954	0.954821		33.0115	0.201726	0.405544	0.444683	0.632085	12.631	-0.0966362	0.639271	0.833451	0.902005
ENSMUSG00000015094	Npdc1	25.2339	0.140638	0.301651	0.242609	0.511063	22.0522	0.0273112	0.153294	0.426071		29.158	0.404591	0.471402	0.165655	0.31668	28.543	-4.27086	0.843091	4.67477e-08	1.53072e-06
ENSMUSG00000036587	Fut7	10.8012	0.210282	0.40117	0.0152785	0.0781928	3.49476	0.00487782	0.153285	0.730976		12.9563	1.90541	1.17471	0.00498367	0.0184271
ENSMUSG00000026944	Abca2	275.176	0.151734	0.171086	0.276718	0.551227	239.706	-0.00645142	0.124505	0.928997	0.974471	335.798	0.404277	0.176696	0.0144401	0.0453397	17.255	-0.130029	0.67398	0.779411	0.867987
ENSMUSG00000047617	BC029214	15.0503	0.064835	0.279989	0.497174	0.750948	11.8008	0.00150356	0.151707	0.955074		14.7333	0.0556764	0.43062	0.811212	0.897633	12.8159	-0.179481	0.8089	0.669141	0.79078
ENSMUSG00000015093	Clic3	6.93366	0.078054	0.297675	0.194955		4.27127	0.00796023	0.153472	0.57978		8.16304	0.29681	0.581905	0.141368	0.282051	2.10571	0.354658	1.02494	0.124304
ENSMUSG00000015090	Ptgds	10.5694	0.00885223	0.27816	0.907369	0.96699	9.11553	-0.00214592	0.152453	0.913503		14.6766	0.168901	0.469906	0.457146	0.643032	13.5263	-0.0449127	0.657766	0.920443	0.955712
ENSMUSG00000015083	C8g	18.7591	0.0717232	0.279962	0.473453	0.731902	13.0149	-0.00873308	0.151949	0.732952		16.1207	-0.0488556	0.430318	0.828645	0.908211	7.91543	-0.125467	0.841023	0.739883	0.840846
ENSMUSG00000015095	Fbxw5	306.052	0.0627634	0.159502	0.636026	0.836777	303.199	0.0933833	0.139682	0.260039	0.569876	298.101	-0.288971	0.18214	0.0875383	0.195398	73.7097	-0.0894648	0.657758	0.844126	0.908876
ENSMUSG00000026942	Traf2	406.136	0.196847	0.153271	0.132167	0.352096	385.465	0.131969	0.145405	0.139891	0.410829	534.908	0.629011	0.147238	8.12754e-06	5.94062e-05	106.881	-1.88143	0.441641	3.81514e-06	6.93521e-05
ENSMUSG00000083528	Gm13432	3.81692	-0.044239	0.289209	0.354789		3.76157	-0.00896061	0.153707	0.469985		3.88109	-0.177778	0.531381	0.198425
ENSMUSG00000015092	Edf1	88.0645	0.239046	0.289365	0.152499	0.385474	78.483	0.0555571	0.154301	0.333104	0.642509	150.095	1.34266	0.273446	1.15248e-07	1.18378e-06	296.326	-1.03453	0.521573	0.0193821	0.0680376
ENSMUSG00000026941	Mamdc4	44.0884	1.48424	0.567874	0.000426225	0.00453444	26.124	0.0442679	0.159133	0.199615		47.3908	1.47473	0.509917	0.000360189	0.00182955	8.24125	0.0351379	0.695888	0.94283	0.967513
ENSMUSG00000036504	Phpt1	3.03598	0.0270779	0.287028	0.52433							4.29823	0.157786	0.517354	0.297093
ENSMUSG00000029419	Gm996	31.1729	0.973527	0.841573	0.00766212	0.0464598	15.4273	0.00450615	0.151413	0.870667		45.8372	1.87005	0.564328	6.36129e-05	0.000388557	3.23971	-0.0567204	0.847461	0.874102	0.928637
ENSMUSG00000015087	Rabl6	312.665	0.493429	0.201104	0.00298199	0.0218957	268.599	0.154112	0.176297	0.100373	0.337036	395.544	0.825247	0.177864	9.74101e-07	8.46596e-06	47.5283	-0.657323	0.522862	0.132614	0.271396
ENSMUSG00000052403	Fcnaos	3.39294	0.0351769	0.287345	0.466278		2.84009	0.00604474	0.153502	0.624756		4.16409	0.140618	0.507857	0.362339
ENSMUSG00000026940	Ccdc183	4.12432	0.0990262	0.312382	0.00789575							3.48973	0.273466	0.610419	0.0175846		1.94305	-0.552482	1.1601	0.064362
ENSMUSG00000026939	Tmem141	5.4617	-0.00399502	0.281207	0.945684		4.40424	-0.00636665	0.153187	0.685742		10.0131	0.264785	0.52553	0.245368	0.421447	8.69495	0.0425914	0.720209	0.92893	0.96023
ENSMUSG00000026938	Fcna	4.21341	-0.0127781	0.283272	0.812466		2.97323	-0.0105554	0.15387	0.396899		6.04952	0.0498895	0.472236	0.781011
ENSMUSG00000062061	Obp2a	2.67632	-0.00434903	0.285816	0.904638							3.94417	0.0409774	0.48756	0.768328
ENSMUSG00000036401	Glt6d1	6.56961	-0.023578	0.281951	0.713358		6.16988	-0.00760425	0.152957	0.680285		5.44635	-0.197763	0.532445	0.228261
ENSMUSG00000023210	Lcn9	16.0081	-0.177479	0.343061	0.10247	0.297828	27.5762	0.0421067	0.157046	0.272478		21.1953	-0.217495	0.436928	0.396992	0.587731
ENSMUSG00000059625	Sohlh1	9.52958	0.0571112	0.285691	0.451171	0.715476	7.34199	0.00493144	0.152671	0.804048		10.3396	0.137136	0.476628	0.504657	0.683043	15.2359	0.891606	0.929511	0.109353	0.237174
ENSMUSG00000058740	Kcnt1	10.3839	0.146635	0.330427	0.0869869	0.267434	4.0436	-0.00394073	0.153124	0.794388		18.2913	1.85374	0.970204	0.00303472	0.0119652
ENSMUSG00000026933	Camsap1	10999.1	-0.0594102	0.0726253	0.396789	0.668943	10335	-0.0699926	0.0685145	0.252933	0.562461	13167.3	0.130773	0.0702379	0.0605359	0.146473	791.687	-0.0804034	0.280071	0.761022	0.85561
ENSMUSG00000036352	Ubac1	879.811	0.180613	0.120025	0.0972129	0.288356	820.758	0.109599	0.110573	0.184544	0.475902	910.224	-0.0086993	0.120011	0.939434	0.968604	124.11	-1.06032	0.35037	0.00111623	0.00746763
ENSMUSG00000026932	Nacc2	352.501	0.59303	0.190746	0.000309	0.00347343	298.584	0.216481	0.201331	0.0458426	0.209928	426.665	0.811823	0.173744	8.57776e-07	7.52717e-06	74.1278	-2.19453	0.50477	1.96133e-06	3.96015e-05
ENSMUSG00000087679	C330006A16Rik	628.203	0.109621	0.132111	0.350958	0.627235	570.974	0.0100628	0.106411	0.897128	0.963248	666.89	-0.0139517	0.13252	0.912007	0.955555	386.404	-0.417707	0.31309	0.15483	0.301484
ENSMUSG00000087595	1810012K08Rik	3.49804	-0.0034339	0.28405	0.941345							4.69276	0.0358591	0.479185	0.824487
ENSMUSG00000036327	Qsox2	29.9829	0.323469	0.468852	0.0514959	0.187967	30.2289	0.0947036	0.192559	0.0312023		30.0279	0.467731	0.492524	0.122492	0.253	38.9806	-1.84455	0.853165	0.00401718	0.0204323
ENSMUSG00000048038	4932418E24Rik	13.4338	0.073233	0.284746	0.421072	0.69013	6.16701	-0.0258871	0.156125	0.139118		18.9912	0.497525	0.600143	0.101384	0.218837	3.56124	-0.558497	1.18643	0.0310549	0.0960997
ENSMUSG00000026930	Gpsm1	20.4125	0.0572677	0.271972	0.59024	0.809935	22.3224	0.0361452	0.155994	0.2919		26.7645	0.340762	0.460035	0.224008	0.394673	3.31398	-0.204677	0.886488	0.551402	0.70286
ENSMUSG00000075467	Dnlz	88.1742	0.592371	0.381419	0.0124022	0.0667004	67.5047	0.0514309	0.15409	0.345233	0.653282	98.4411	0.733703	0.318446	0.00597015	0.0214971	55.2585	0.504837	0.464348	0.212542	0.375143
ENSMUSG00000026928	Card9	12.3001	0.105298	0.302944	0.209282	0.466874	8.45679	0.00896558	0.152842	0.662324		14.8935	0.421618	0.611698	0.122561	0.253023	1.94505	0.325406	1.00982	0.146842
ENSMUSG00000086779	Gm13562	14.9192	-0.0355029	0.273831	0.700149	0.871477	10.5085	-0.0321173	0.157266	0.146257		13.5803	-0.326231	0.535506	0.199065	0.362645	11.9151	0.198722	0.649925	0.675579	0.795222
ENSMUSG00000036281	Snapc4	415.445	0.283733	0.189307	0.0605087	0.209863	339.219	-0.0105733	0.126603	0.882853	0.959653	517.467	0.598616	0.164483	0.000122605	0.000700053	114.254	-2.44735	0.402781	1.57193e-10	9.69979e-09
ENSMUSG00000085767	Gm13563	3.71001	0.0321986	0.286194	0.532679		4.06864	0.011877	0.153811	0.419968		3.33607	0.0400387	0.485731	0.782155
ENSMUSG00000026927	Sdccag3	409.992	0.0597977	0.14575	0.635356	0.836395	370.536	-0.0212413	0.118175	0.779028	0.919268	465.601	0.116821	0.150009	0.415338	0.604995	247.274	-0.0381559	0.382547	0.909916	0.95043
ENSMUSG00000026926	Pmpca	142.896	0.286619	0.250727	0.0947644	0.283028	128.825	0.0663885	0.155467	0.297707	0.611262	230.167	1.20999	0.230614	2.39636e-08	2.70977e-07	185.106	-2.29591	0.345167	3.99433e-12	3.53943e-10
ENSMUSG00000026925	Inpp5e	427.481	-0.093711	0.148038	0.460109	0.723048	410.043	-0.0368665	0.116921	0.634101	0.845791	524.137	0.133976	0.145182	0.335947	0.525891	70.8942	0.790015	0.389827	0.0257921	0.0838524
ENSMUSG00000026924	Sec16a	14319.8	-0.347675	0.076754	1.96396e-06	4.8069e-05	13756.6	-0.293192	0.0747185	1.77703e-05	0.000578366	16058.7	-0.348414	0.0720012	1.00424e-06	8.70358e-06	1988.55	0.190018	0.424798	0.620484	0.756567
ENSMUSG00000086714	0610009E02Rik	10.321	-0.0045528	0.276285	0.951241	0.982808	10.2123	0.00155062	0.152247	0.946275		10.5968	-0.06368	0.452012	0.760196	0.86784
ENSMUSG00000026923	Notch1	185.35	0.0361035	0.188083	0.802315	0.920958	183.945	0.0566951	0.138813	0.439644	0.732246	217.126	0.151858	0.206861	0.421571	0.610568	43.6356	1.42713	0.883463	0.0211694	0.0727714
ENSMUSG00000026921	Egfl7	8.64624	0.147655	0.336209	0.0496279		6.41809	0.0258163	0.156054	0.152153		8.18418	0.412425	0.672851	0.0835285	0.188533	2.39985	-0.680496	1.21228	0.0758323
ENSMUSG00000026922	Agpat2	104.001	0.305204	0.290875	0.0884729	0.27004	82.4196	0.0138359	0.143652	0.79673	0.926095	128.658	0.66748	0.290904	0.00728224	0.0254422	220.129	-1.17562	0.426141	0.00215118	0.0124522
ENSMUSG00000036186	Fam69b	31.7447	-0.00957784	0.256026	0.931105	0.975787	31.1515	0.00354853	0.148949	0.926807		34.7145	-0.0486316	0.371015	0.845365	0.918159	17.0113	-1.8266	0.965438	0.00753619	0.0331072
ENSMUSG00000015787	Abo	13.0906	0.0775418	0.2864	0.395765	0.668125	12.1946	0.0192382	0.153426	0.452185		22.0621	0.948842	0.753393	0.0216324	0.0631829	41.3748	0.67405	0.779929	0.197072	0.355602
ENSMUSG00000036160	Surf6	1270.98	0.043548	0.108494	0.665779	0.853239	1258.16	0.12262	0.10288	0.127018	0.387632	1884.32	0.751829	0.0976864	4.79484e-15	1.23976e-13	245.809	-1.52111	0.465034	0.000267754	0.00235143
ENSMUSG00000015776	Med22	682.687	-0.311522	0.132983	0.00873316	0.0514471	742.389	0.0386208	0.102555	0.61761	0.838328	824.46	-0.108398	0.133867	0.399663	0.590199	206.8	0.235415	0.350315	0.47021	0.635822
ENSMUSG00000062647	Rpl7a	1473.23	-0.0920186	0.109077	0.360296	0.636618	1751.36	0.4617	0.119146	1.02519e-05	0.000362551	1642.23	-0.108589	0.107464	0.300487	0.487292	556.09	-0.155673	0.318897	0.602457	0.74355
ENSMUSG00000065258	Gm23969	4.82188	0.0183309	0.283174	0.749969		4.03368	0.000870294	0.153041	0.957229		8.53838	0.289983	0.557669	0.183708	0.341633
ENSMUSG00000015790	Surf1	102.627	0.116178	0.22576	0.438676	0.705058	95.8063	0.0370406	0.144767	0.537159	0.795251	112.316	0.142221	0.263995	0.529442	0.703746	209.403	0.533419	0.548919	0.237016	0.404437
ENSMUSG00000014873	Surf2	75.344	0.19332	0.270851	0.221729	0.484655	71.5203	0.0583473	0.158708	0.267929	0.578814	113.063	1.00686	0.310834	0.000217036	0.00116587	249.322	-1.00477	0.564394	0.0308444	0.0957017
ENSMUSG00000014867	Surf4	4589.17	-0.164794	0.0822929	0.0360249	0.146158	4534.16	-0.0377645	0.0731276	0.55652	0.806593	4860.8	-0.338811	0.0932405	0.000210382	0.00113433	1823.36	1.5586	0.286442	1.43785e-08	5.28164e-07
ENSMUSG00000049897	Stkld1	11.8688	0.112861	0.306025	0.192412	0.442756	6.42555	-0.00192342	0.15267	0.915628		13.4575	0.364782	0.569541	0.160611	0.30948	2.58092	0.111149	0.883291	0.728055
ENSMUSG00000052406	Rexo4	300.694	0.945713	0.216858	1.16343e-06	3.01438e-05	288.272	0.966655	0.22297	7.73411e-07	4.36314e-05	461.565	1.63262	0.179031	9.1739e-21	4.06286e-19	256.01	-2.27518	0.498908	6.64935e-07	1.55016e-05
ENSMUSG00000014852	Adamts13	9.5774	-0.0510534	0.283492	0.502839	0.755365	10.3088	-0.00555411	0.152236	0.802384		13.3039	0.00123566	0.440972	0.99859	0.999325	3.85066	0.287104	0.856413	0.496233	0.656791
ENSMUSG00000015488	Cacfd1	152.731	-0.0441466	0.198936	0.758455	0.898073	138.527	-0.0491252	0.14258	0.466463	0.749058	161.763	-0.195092	0.230174	0.339936	0.529925	60.7451	0.362468	0.392903	0.309351	0.483041
ENSMUSG00000036067	Slc2a6	19.0496	0.113176	0.294614	0.290914	0.566511	12.3644	-0.00707881	0.151841	0.78		24.8403	0.54443	0.565433	0.0881392	0.196151	2.97238	0.69081	1.16875	0.114214	0.244427
ENSMUSG00000083335	Gm13397	9.57036	0.0670503	0.287968	0.391353	0.664042	7.01953	0.0041611	0.152577	0.837869		14.8174	0.545992	0.703579	0.0748214	0.172975
ENSMUSG00000087364	Gm13398	32.7355	-0.00563227	0.256363	0.959256	0.985647	30.9389	-0.00132045	0.148618	0.970109		43.2269	0.242313	0.377785	0.363255	0.554318	17.5993	2.99685	0.868277	5.5411e-05	0.00065654
ENSMUSG00000036040	Adamtsl2	3.82079	-0.0233	0.284847	0.649058		6.27998	0.0124116	0.153448	0.504765		5.48188	0.00843271	0.474113	0.962249
ENSMUSG00000009216	Fam163b	3.72696	-0.0397965	0.287838	0.429665		5.30058	0.001937	0.152819	0.914784		6.69956	0.0440905	0.469425	0.809539	0.896988
ENSMUSG00000085008	Dbhos	27.3467	-0.0862078	0.272536	0.464663	0.725715	33.1673	0.0223639	0.150494	0.576236		34.1434	-0.0356337	0.364638	0.885776	0.941407	4.23809	1.17369	1.47196	0.057478	0.15064
ENSMUSG00000000889	Dbh	111.784	-0.0174709	0.20649	0.899743	0.963788	102.29	-0.0262402	0.14096	0.665297	0.862811	106.402	-0.439938	0.300028	0.0745474	0.172469	11.6953	0.626622	0.763854	0.224054	0.3887
ENSMUSG00000009614	Sardh	245.989	0.0699334	0.173304	0.616321	0.825637	200.843	-0.122003	0.169377	0.149657	0.424567	316.043	0.425715	0.184502	0.0131066	0.0419123	49.7597	-10.1162	3.03136	7.6932e-12	6.45021e-10
ENSMUSG00000009621	Vav2	323.574	0.435107	0.196664	0.00688381	0.0426441	288.453	0.177463	0.192171	0.0728364	0.278164	357.723	0.459248	0.181983	0.00680441	0.024012	13.2166	-1.09253	0.921436	0.0636239	0.161847
ENSMUSG00000076364	Gm24049	17.054	0.133103	0.308657	0.203134	0.457952	10.4994	-0.0026777	0.151885	0.909229		20.0117	0.460333	0.561109	0.12314	0.25388	1.92965	-0.404749	0.987519	0.243172
ENSMUSG00000109946		12.7119	-0.043054	0.277305	0.623334	0.829502	12.8081	-0.0071177	0.151677	0.786006		16.2194	-0.01167	0.423696	0.957063	0.978574	10.1825	0.312377	0.793411	0.503616	0.663089
ENSMUSG00000026918	Brd3	1200.44	0.358061	0.114298	0.000693946	0.00679558	1014.28	0.0543407	0.100591	0.482836	0.759751	1355.3	0.398149	0.112903	0.000288287	0.00150216	268.634	-0.355126	0.299487	0.208663	0.37036
ENSMUSG00000026917	Wdr5	5837.88	-0.189413	0.078164	0.0115445	0.0633841	5617.22	-0.125731	0.075143	0.055949	0.236386	6510.57	-0.20549	0.0729163	0.00486399	0.0180337	1773.78	-0.0730777	0.38852	0.831552	0.900894
ENSMUSG00000080538	Gm25541	94.3104	-0.451139	0.378704	0.0335302	0.13855	99.8264	-0.0699883	0.158947	0.260578	0.569876	106.228	-0.576845	0.338792	0.0335456	0.090965
ENSMUSG00000085929	Gm13421	18.0547	1.79068	0.981412	0.00218454	0.0172092	10.6711	0.0394302	0.159612	0.0961834		34.3507	3.08954	0.668404	3.24237e-07	3.07481e-06	11.725	-1.0084	1.05391	0.0822522	0.193857
ENSMUSG00000015846	Rxra	531.313	0.208528	0.145665	0.0988254	0.291223	482.018	0.0706544	0.121199	0.383569	0.686905	617.287	0.334999	0.142199	0.0140901	0.0444203	32.4128	-0.315413	0.559816	0.481479	0.645505
ENSMUSG00000026837	Col5a1	8.81898	0.0520991	0.285151	0.476925	0.734108	6.97934	0.00497695	0.152794	0.792206		7.86713	0.0373069	0.463358	0.847748	0.919737
ENSMUSG00000086425	F730016J06Rik	216.822	0.0260925	0.177113	0.851947	0.942881	223.204	0.0905213	0.153137	0.246604	0.554894	242.888	0.04325	0.193143	0.809905	0.897131	82.9301	0.505944	0.470701	0.216422	0.379449
ENSMUSG00000026833	Olfm1	595.899	-0.137611	0.13158	0.238552	0.506079	568.103	-0.076236	0.117478	0.346826	0.653889	636.937	-0.289659	0.134486	0.0249617	0.0710181	105.561	0.737745	0.412915	0.0465394	0.128832
ENSMUSG00000087196	Gm13373	3.42168	0.00713987	0.284081	0.885299							3.81793	0.0189846	0.484732	0.894777
ENSMUSG00000035829	Ppp1r26	69.8213	-0.101242	0.24286	0.481271	0.738356	80.2779	0.0428234	0.149489	0.443858	0.734988	69.4837	-0.465456	0.361222	0.0909389	0.200942	4.92598	-0.210648	0.851056	0.594523	0.737171
ENSMUSG00000026831	1700007K13Rik	4.97865	0.0263067	0.284764	0.628054		3.71956	0.000406565	0.15327	0.977623		4.51667	0.0175859	0.484187	0.90522		4.90547	-0.103592	0.85959	0.76447	0.857871
ENSMUSG00000035772	Mrps2	546.451	-0.208929	0.142432	0.0920496	0.277647	558.049	-0.0113988	0.110238	0.881043	0.958938	595.176	-0.317799	0.143829	0.0207705	0.0610922	259.401	-0.803656	0.412754	0.0298226	0.0934306
ENSMUSG00000082895	Rpsa-ps9	4.01143	-0.00214238	0.283375	0.964645		3.52702	-0.00248658	0.153246	0.851675		5.00002	0.0244966	0.47659	0.883591
ENSMUSG00000026829	Gbgt1	9.83619	0.0535141	0.283339	0.50071	0.753738	7.3012	0.000154952	0.152503	0.996605		10.246	0.108552	0.461321	0.610412	0.764668	6.8171	-0.389405	0.769899	0.41674	0.587749
ENSMUSG00000063611	Gm10134	11.8236	-0.00354033	0.275302	0.962703	0.98649	7.29623	-0.0266124	0.156252	0.139035		11.3633	-0.115168	0.461311	0.58919	0.74963	6.38878	0.161871	0.823524	0.697084	0.810029
ENSMUSG00000026821	Ralgds	1692.53	-0.00875963	0.0959021	0.921815	0.972599	1631.13	0.0297615	0.0858871	0.677276	0.869306	1823.11	-0.114241	0.0947226	0.218899	0.387998	132.298	0.333328	0.40305	0.360809	0.534348
ENSMUSG00000026818	Cel	14.2938	3.50096	1.16512	0.000213998	0.00256245	2.65547	0.00882246	0.153766	0.452766		34.5431	4.97837	0.937098	3.84015e-08	4.20464e-07
ENSMUSG00000087667	Gm13381	14.4483	0.109589	0.298667	0.258599	0.530168	10.3132	0.00576663	0.152041	0.812784		15.0261	0.233489	0.47512	0.345441	0.535703
ENSMUSG00000026816	Gtf3c5	913.625	-0.281904	0.132634	0.0171202	0.0847863	1039.49	0.138292	0.122742	0.113596	0.361224	1251.99	0.255357	0.119542	0.0275528	0.0770946	387.023	-1.94819	0.349231	4.35527e-09	1.80156e-07
ENSMUSG00000026815	Gfi1b	9.66384	0.0370425	0.279645	0.640388	0.839786	8.55819	0.0056539	0.152468	0.792591		13.3071	0.259492	0.502866	0.281312	0.464343	2.49143	-0.095872	0.88548	0.750147
ENSMUSG00000026812	Tsc1	3176.46	0.0745504	0.0838442	0.352853	0.628796	3024.8	0.0762263	0.0797102	0.264864	0.575857	3740.81	0.219535	0.0807186	0.00584532	0.0211456	571.122	0.102703	0.419428	0.785919	0.871947
ENSMUSG00000026807	Ak8	26.2686	0.228838	0.365873	0.100351	0.294083	18.9712	0.0145168	0.151617	0.637098		50.4506	1.8408	0.493618	1.56654e-05	0.000107935	7.91422	-0.345553	0.800256	0.456984	0.624305
ENSMUSG00000035666	Gtf3c4	1002.17	-0.762889	0.134826	1.89159e-09	9.86769e-08	1019.5	-0.456254	0.152976	0.00024151	0.00465988	1296.18	-0.269012	0.118414	0.0191857	0.0572911	349.048	-0.58294	0.358333	0.0766185	0.18432
ENSMUSG00000026806	Ddx31	363.744	0.0146372	0.150054	0.910337	0.968289	366.962	0.0902692	0.133498	0.27468	0.586939	499.191	0.527809	0.161059	0.00054581	0.0026463	156.301	-1.21373	0.405923	0.00099513	0.00682036
ENSMUSG00000026805	Barhl1	31.3322	-0.86909	0.81261	0.00929793	0.053845	39.9068	-0.0178103	0.150072	0.640902		37.413	-0.789184	0.523319	0.0240108	0.0688986	5.15477	0.90139	1.11866	0.107151	0.233881
ENSMUSG00000079502	1700101E01Rik	38.0151	-0.0372629	0.251873	0.764539	0.901655	33.4594	-0.0265466	0.151313	0.506805		42.8597	-0.0538743	0.348619	0.829683	0.908706	5.79303	-1.28149	1.23547	0.0483942	0.132285
ENSMUSG00000083773	Gm13394	51.7143	0.0861348	0.251437	0.529992	0.773521	42.6795	-0.00919377	0.147179	0.831691		61.2087	0.27227	0.338552	0.294535	0.480542
ENSMUSG00000026803	Ttf1	433.687	0.537162	0.175984	0.000443187	0.00468161	362.329	0.155414	0.15624	0.0997204	0.336482	564.856	0.926583	0.147192	7.22765e-11	1.16505e-09	189.263	-1.43508	0.404166	0.000108662	0.00112308
ENSMUSG00000086519	Gm13393	4.13748	0.0643448	0.295839	0.141781							3.4234	0.145899	0.519643	0.255929
ENSMUSG00000043535	Setx	11961.2	-0.0382699	0.0745041	0.595864	0.814036	10720.5	-0.177554	0.0765599	0.00839578	0.0667998	14936.6	0.263005	0.0719261	0.000219351	0.00117685	2252.78	-0.162185	0.260135	0.513213	0.670829
ENSMUSG00000035513	Ntng2	4.23385	0.00258297	0.282694	0.965202		3.25309	-0.00485491	0.153307	0.722361		6.20487	0.114419	0.484325	0.530356
ENSMUSG00000079499	6530402F18Rik	7.1643	-0.0027665	0.279482	0.964856		5.5333	-0.00902305	0.153237	0.596379		7.05869	-0.0618485	0.468534	0.738173	0.854079
ENSMUSG00000026799	Med27	4811.02	-0.204381	0.0849017	0.0114205	0.0629343	5025.24	0.058861	0.0722595	0.356475	0.662248	4791.86	-0.596825	0.0798932	3.65396e-14	8.54359e-13	1461.88	-0.00596377	0.300627	0.97345	0.985601
ENSMUSG00000086994	Gm13402	4.27295	-0.0749901	0.299377	0.104544		4.96142	-0.0135595	0.153888	0.395578		5.83932	-0.173277	0.508623	0.337558		2.49244	-0.678681	1.2149	0.0735219
ENSMUSG00000039844	Rapgef1	1298.04	0.0554857	0.104767	0.570338	0.798129	1184.38	-0.0243006	0.0966267	0.746118	0.903902	1467.33	0.0913916	0.104981	0.374141	0.565292	70.175	0.0323721	0.415675	0.933165	0.962582
ENSMUSG00000079497	Gm13420	2.84832	-0.00252175	0.284377	0.954553		4.78627	0.0138918	0.153941	0.384386		4.31606	0.0763123	0.486162	0.631593
ENSMUSG00000075425	Gm13547	4.95912	0.0142618	0.282642	0.808114		4.16343	-0.000239173	0.153012	0.985181		5.98008	0.072971	0.476991	0.681257
ENSMUSG00000039826	Trub2	366.693	-0.347983	0.178124	0.0183248	0.0890964	476.615	0.310278	0.217637	0.0152405	0.100158	505.948	0.187207	0.153122	0.199773	0.363429	270.478	-2.46754	0.434463	1.56098e-09	7.27822e-08
ENSMUSG00000026798	Coq4	161.219	0.70717	0.285528	0.00142959	0.012292	152.83	0.625284	0.343167	0.00278488	0.0298035	185.523	0.836546	0.253284	0.000245326	0.00130208	204.26	-3.18545	0.469892	1.12225e-12	1.14037e-10
ENSMUSG00000059316	Slc27a4	130.799	0.271241	0.253213	0.111293	0.314331	124.64	0.125987	0.190719	0.111294	0.358286	185.826	0.926915	0.243421	3.09205e-05	0.000200586	62.8626	-2.13576	0.922107	0.00215639	0.0124683
ENSMUSG00000069020	Urm1	121.483	0.159518	0.223376	0.305156	0.582131	113.946	0.0541142	0.148507	0.397836	0.699698	148.976	0.444316	0.249693	0.0421784	0.109762	89.9706	-2.69355	0.53019	4.12004e-08	1.36825e-06
ENSMUSG00000039787	Cercam	41.5143	1.54579	0.551155	0.00024122	0.00283398	14.8346	-0.0150118	0.152172	0.593849		57.443	2.05941	0.464231	7.38354e-07	6.55595e-06	23.7816	-0.87982	0.611808	0.069949	0.173327
ENSMUSG00000026790	Odf2	10009.3	-0.134785	0.082692	0.0878723	0.269045	9945.43	-0.000656312	0.0665181	0.990519	0.997225	10512.6	-0.333978	0.0769825	1.10375e-05	7.86403e-05	518.409	0.769112	0.370487	0.0236449	0.0788177
ENSMUSG00000019715	Gle1	4254.88	-0.0109306	0.0813672	0.887775	0.958378	4221.13	0.0979703	0.0772841	0.143511	0.41569	4744	-0.017336	0.0766551	0.817502	0.901953	1157.78	-0.399776	0.247021	0.0927488	0.210861
ENSMUSG00000057738	Sptan1	8311.89	-0.0591256	0.0824719	0.458519	0.721557	7520.43	-0.172527	0.0753322	0.0094405	0.0723286	9760.2	0.0780734	0.0712346	0.268714	0.44913	322.51	-0.911009	0.333866	0.00341926	0.0179882
ENSMUSG00000039715	Wdr34	55.862	0.791833	0.491426	0.00658922	0.0412791	45.4996	0.0903066	0.183044	0.0826874		66.6554	1.08421	0.407214	0.00109962	0.00490787	52.9944	-2.17028	0.804654	0.000799205	0.00570403
ENSMUSG00000054766	Set	4240.33	-0.0274009	0.103649	0.776382	0.90819	4743.46	0.170178	0.205042	0.0774663	0.288236	5774.15	0.482631	0.10126	1.11308e-06	9.56674e-06	2633.21	-0.645669	0.402989	0.0749904	0.181854
ENSMUSG00000026785	Pkn3	70.2684	0.88958	0.437895	0.00268866	0.0201759	44.1641	0.0215243	0.148428	0.635781		121	1.91585	0.318581	1.72857e-10	2.64516e-09	84.2932	-3.04641	0.735037	2.52818e-06	4.94449e-05
ENSMUSG00000015335	Zdhhc12	68.6616	-0.0405054	0.231977	0.77417	0.906938	60.9624	-0.0410569	0.150648	0.434835	0.728434	73.5682	-0.170378	0.303447	0.483394	0.665068	57.4106	-2.12281	0.646428	0.000137957	0.00137347
ENSMUSG00000039686	Zer1	53.394	0.178906	0.295463	0.223461	0.486869	38.8	-0.0104609	0.14831	0.777309		65.473	0.544195	0.392139	0.0622625	0.149768	25.7116	-0.709017	0.676431	0.157938	0.305343
ENSMUSG00000039678	Tbc1d13	1710.41	0.0884423	0.0988473	0.340919	0.618287	1649.79	0.109867	0.0954427	0.153184	0.429837	2041.79	0.269873	0.0944187	0.00359755	0.0138556	532.045	-0.565429	0.556129	0.208184	0.369826
[truncated: 26,640 more rows]

## Sheet: TEs
# Supplementary Table 9
# TE expression changes in Dux/Obox4 knockdown and Obox knockout 2C embryos
Name	family	baseMean_DuxKD	log2FoldChange_DuxKD	lfcSE_DuxKD	pvalue_DuxKD	padj_DuxKD	baseMean_Obox4KD	log2FoldChange_Obox4KD	lfcSE_Obox4KD	pvalue_Obox4KD	padj_Obox4KD	baseMean_doubleKD	log2FoldChange_doubleKD	lfcSE_doubleKD	pvalue_doubleKD	padj_doubleKD	baseMean_OboxKO	log2FoldChange_OboxKO	lfcSE_OboxKO	pvalue_OboxKO	padj_OboxKO
L1_Mus3	L1	23460.1	0.00713302	0.0630527	0.904233	0.983622	20289.4	-0.0988189	0.0832967	0.0544749	0.381324	25087.2	-0.0624486	0.0680846	0.328055	0.575609	2195.32	-0.125829	0.303836	0.658891	0.79822
L1Md_F	L1	6884.38	0.501855	0.0706236	1.05551e-13	9.23569e-12	4791.72	-0.177351	0.0954465	0.00600155	0.0812585	7891.32	0.610101	0.0670604	1.0716e-20	6.3693e-19	308.709	-0.170963	0.402804	0.631668	0.779507
L1_Rod	L1	5106.66	0.0497189	0.0640636	0.385744	0.810416	4509.45	-0.0198027	0.0613549	0.606025	0.949731	5731.01	0.109797	0.0684819	0.087427	0.251949	732.302	0.36867	0.330167	0.229236	0.411153
Lx9	L1	18201.7	-0.091202	0.0620528	0.133501	0.530655	17008.8	-0.0197231	0.0591861	0.614501	0.949775	19668.8	-0.135667	0.0635085	0.0232526	0.099538	2770.37	0.153244	0.294075	0.5835	0.743387
L1M4	L1	6881.18	0.127497	0.0656628	0.0281937	0.204161	6027.62	0.00926046	0.0576868	0.813417	0.986811	7806.23	0.221238	0.0658449	0.000375168	0.00342506	1107.77	0.0353658	0.251929	0.886611	0.93809
L1_Mur2	L1	14432.1	-0.0807943	0.0597026	0.138448	0.533761	13854.7	0.015938	0.0570152	0.628527	0.949775	15137.2	-0.221009	0.0633094	0.000229982	0.00223177	1537.16	-0.379587	0.383299	0.273394	0.462088
RLTR26B_MM	ERVK	507.974	0.166569	0.142707	0.0644365	0.350689	463.588	0.0574034	0.0953478	0.113355	0.599521	531.902	0.0993865	0.125923	0.319742	0.568996	22.0847	-0.00649033	0.560564	0.985373	0.993345
RLTR25A	ERVK	2947.88	0.232239	0.086752	0.00173074	0.0252399	2739.29	0.225752	0.117039	0.00357532	0.0567283	3385.31	0.360105	0.0834445	3.66597e-06	5.5537e-05	147.915	-0.506269	0.442835	0.187348	0.358807
L1M2	L1	7525.84	0.0666841	0.062554	0.233477	0.671693	6776.61	0.0137744	0.0578772	0.738228	0.978173	8703.73	0.207168	0.0647155	0.000710107	0.0061392	1216.78	0.113047	0.261391	0.654182	0.795108
B3	B2	126224	0.094627	0.0571652	0.0547604	0.315926	114999	0.0576631	0.0686834	0.25943	0.767573	137805	0.0904349	0.0570567	0.0973973	0.271398	16759.5	-0.314179	0.265627	0.21233	0.391003
L1VL1	L1	1574.94	0.345681	0.0971525	4.62298e-05	0.00123445	1254.67	0.00147709	0.0642427	0.973896	0.999546	1841	0.516931	0.0915234	2.1364e-09	5.34663e-08	156.67	0.126734	0.358738	0.702341	0.826601
L1Md_F2	L1	71853.8	-0.172887	0.0807579	0.00892286	0.08675	58283	-0.587334	0.118044	3.49371e-08	5.54336e-06	82435.3	-0.0705736	0.0753768	0.310223	0.56349	3344.85	-0.159147	0.364633	0.631792	0.779507
ERVB7_1-LTR_MM	ERVK	1082.22	-0.060961	0.0972512	0.40294	0.813737	948.569	-0.0785306	0.106447	0.0809463	0.495458	1073.18	-0.377897	0.122202	0.000378161	0.00342506	184.005	0.799039	0.423436	0.0330142	0.106833
L1MEf	L1	1923.87	0.158409	0.0897857	0.0304613	0.217581	1614.2	-0.0185652	0.0644863	0.62365	0.949775	2043.77	0.0910169	0.0802732	0.214704	0.451734	261.325	-0.024698	0.303041	0.928423	0.962981
RLTR14	ERV1	5442.79	-0.391586	0.0708675	3.7734e-09	1.80094e-07	5874.15	0.0421747	0.0643685	0.319357	0.796497	5801.04	-0.499028	0.0764855	9.55261e-12	3.49405e-10	783.447	-0.997401	0.278862	0.000163058	0.00163817
RMER17A	ERVK	1395.71	-0.051617	0.0843223	0.446822	0.832713	1302.86	-0.00717205	0.0643491	0.845762	0.986811	1445.02	-0.22409	0.0923405	0.00671317	0.0380014	72.16	-0.133259	0.367431	0.688789	0.816929
RLTR13E	ERVK	531.727	0.180406	0.146463	0.0511705	0.300948	420.451	-0.0180601	0.0740884	0.532133		618.157	0.376122	0.141183	0.00141355	0.010841	83.8511	-0.431134	0.350768	0.179187	0.34818
Lx2	L1	6446.61	-0.173196	0.0674873	0.00394935	0.0460757	6005.37	-0.0860949	0.0785212	0.08177	0.495458	6957.57	-0.236186	0.0676822	0.000217215	0.00215179	1039.37	0.172779	0.278317	0.516206	0.690765
IAPLTR1a_Mm	ERVK	908.007	0.516831	0.114875	5.30746e-07	1.9903e-05	748.706	0.117979	0.145682	0.0361682	0.302037	1124.04	0.814615	0.108731	5.41674e-15	2.45301e-13	232.811	-0.0130384	0.299554	0.961154	0.981405
ERVB7_3-LTR_MM	ERVK	104.5	-0.056316	0.139052	0.3381	0.774619	98.7028	-0.00912955	0.0766065	0.600999		123.688	-0.0142731	0.158814	0.882484	0.953156	40.0706	1.23373	0.666729	0.0175546	0.0672574
ID_B1	B4	87590	0.0109501	0.0547908	0.829056	0.974814	79506.2	-0.00820357	0.0549072	0.82338	0.986811	97299.8	0.0424971	0.0568112	0.447334	0.664674	9105.85	-0.393869	0.281429	0.138399	0.29213
L1Md_A	L1	55847.1	-0.0460397	0.0722972	0.480553	0.840968	48471.6	-0.135639	0.107866	0.0247395	0.242579	66036.2	0.134096	0.0789869	0.0653413	0.205081	1895.35	-0.605223	0.431287	0.108118	0.247706
RLTR1D	ERV1	244.266	-0.0328107	0.116802	0.630141	0.916687	201.487	-0.0559559	0.101575	0.0575212		255.198	-0.139168	0.157451	0.207342	0.445106	76.5422	0.314557	0.411184	0.389051	0.580725
MER44D	TcMar-Tigger	434.708	0.439005	0.16047	0.000483626	0.00871556	349.513	0.0334927	0.0793029	0.290208		467.296	0.398284	0.155029	0.00165814	0.012224	76.9518	0.115139	0.387864	0.744023	0.853478
Tigger7	TcMar-Tigger	2364.2	0.0315516	0.0715363	0.609599	0.913568	2130.93	-0.00267089	0.061737	0.939253	0.999546	2629.02	0.0673666	0.0752206	0.333662	0.579038	384.213	-0.155688	0.311928	0.592212	0.750009
RLTR13C1	ERVK	183.478	-0.00292838	0.119194	0.961706	0.987103	175.46	0.011563	0.0750574	0.626179		185.819	-0.114718	0.16814	0.289389	0.540603	29.5284	0.00794093	0.596459	0.989116	0.995081
MER74B	ERVL	104.51	-0.0042688	0.126395	0.936821	0.984877	105.327	0.0234588	0.080283	0.415427		120.228	0.043979	0.163397	0.657195	0.824529	18.6473	0.0140618	0.556634	0.97679	0.989215
ID4_	ID	15906.1	-0.0120721	0.0575727	0.816975	0.968199	14706.4	0.00409782	0.0566851	0.918282	0.999546	17965.7	0.0598115	0.0603969	0.301072	0.55274	1797.61	-0.00581541	0.262478	0.978799	0.990073
MLT1A1	ERVL-MaLR	3462.6	0.00678514	0.0682062	0.923149	0.984877	3219.54	0.0202557	0.0614363	0.609654	0.949775	3740.78	-0.034588	0.0711631	0.602612	0.789372	425.695	-0.020464	0.349029	0.946429	0.973255
Lx4B	L1	2408.91	-0.0840959	0.0784905	0.200029	0.62652	2174.62	-0.0754254	0.0845475	0.108373	0.586199	2547.27	-0.207069	0.0816336	0.00553323	0.032086	317.021	-0.0565	0.310458	0.843899	0.913174
B4A	B4	53544.8	0.0913191	0.0577179	0.0647516	0.350689	48246.8	0.03035	0.0600049	0.453451	0.894586	58482	0.089142	0.0575909	0.10721	0.286396	6696.03	-0.233752	0.26438	0.353118	0.54602
BGLII_Mur	ERVK	417.963	-0.120122	0.127519	0.144169	0.534903	391.059	-0.0283087	0.0769919	0.356535		456.891	-0.172851	0.135152	0.101599	0.27685	57.5084	-0.806874	0.490584	0.0522647	0.148694
L1_Mur3	L1	16820.7	-0.0406453	0.0598278	0.453134	0.833425	15268.3	-0.0391649	0.0621621	0.338204	0.798484	18288.3	-0.07707	0.0621162	0.222892	0.463831	1764.12	-0.113585	0.3018	0.686634	0.815587
B2_Mm2	B2	132664	0.521396	0.076547	1.34108e-12	1.08318e-10	120363	0.462368	0.11567	3.83455e-06	0.000165932	132217	0.269735	0.0766666	0.000168798	0.00168975	52598.8	0.439911	0.350369	0.169662	0.334959
B1_Mus1	Alu	86328.9	0.163245	0.0610765	0.00512855	0.0560935	81647.3	0.186694	0.099718	0.00498343	0.069768	95056.6	0.16687	0.0615815	0.00422561	0.0264379	13063.8	-0.130896	0.335751	0.657612	0.797593
Lx7	L1	17965.7	-0.0398362	0.0587628	0.461435	0.835227	16608.4	-0.0116746	0.0564682	0.764275	0.986811	19176.6	-0.121001	0.0615995	0.0363398	0.13292	3248.02	0.249493	0.277159	0.345033	0.538582
ERVB4_2-LTR_MM	ERVK	580.129	-0.77943	0.136123	6.10468e-10	3.56106e-08	632.722	-0.0643812	0.0947116	0.118826	0.609194	595.826	-1.08084	0.130324	7.2235e-18	3.81642e-16	535.758	-0.0920811	0.314625	0.7535	0.85924
RLTR45-int	ERVK	5415.15	0.320199	0.0892325	4.78394e-05	0.00123445	4305.3	-0.0136652	0.0636329	0.719299	0.967193	5854.19	0.29364	0.073202	1.95174e-05	0.000237963	1112.03	-2.049	0.434392	3.42856e-07	8.86433e-06
PB1D10	Alu	46253.5	0.00325279	0.0558489	0.94697	0.984877	42478.1	0.00376218	0.0554442	0.921014	0.999546	51466.7	0.0377097	0.057912	0.496746	0.710384	5067.53	-0.38531	0.264219	0.122371	0.268738
ORR1E	ERVL-MaLR	10400.4	0.0203308	0.0588991	0.706635	0.927676	9326.46	-0.0195422	0.0577989	0.617586	0.949775	11152.5	-0.0420861	0.0612086	0.47688	0.692746	1333.11	0.258565	0.295686	0.355239	0.548075
PB1D11	Alu	13798.9	-0.0376654	0.0581422	0.476362	0.839801	12852.8	-1.39273e-06	0.0558249	0.999546	0.999546	15522.3	0.0215215	0.0597474	0.70137	0.847314	1096.87	-0.415957	0.293795	0.132048	0.283284
RLTR9D2	ERVK	303.771	-0.0575433	0.118901	0.42236	0.821056	291.922	7.35797e-05	0.0720506	0.998159		355.014	0.0285171	0.124196	0.771986	0.896409	21.6741	-0.5701	0.559808	0.200929	0.376364
B2_Mm1t	B2	143566	0.77874	0.0748316	1.52197e-26	2.28296e-24	131078	0.614303	0.267871	0.000704485	0.0139723	137999	0.45707	0.0752105	1.97379e-10	6.25693e-09	113046	0.63793	0.363679	0.0632845	0.170761
Charlie2b	hAT-Charlie	2926.31	-0.108083	0.0755427	0.0920343	0.43375	2718.84	-0.0395359	0.0682702	0.329643	0.796497	3160.31	-0.167163	0.0811158	0.0240332	0.10158	52.8515	-0.116575	0.393227	0.739508	0.850922
Lx8	L1	28403.7	-0.132448	0.0608116	0.0164184	0.144227	26973.4	-0.0229385	0.0577394	0.567899	0.935364	30610	-0.193261	0.0617709	0.000841215	0.00689652	3429.3	0.0703096	0.278554	0.79162	0.881907
ORR1F	ERVL-MaLR	14544.1	-0.00386605	0.058342	0.940678	0.984877	13611	0.0248212	0.0588349	0.520478	0.91198	15638	-0.0614489	0.0615107	0.294597	0.546124	1444.47	0.0414682	0.280631	0.878961	0.933549
RSINE1	B4	79399.4	-0.00277649	0.0552177	0.96172	0.987103	71074.4	-0.0391224	0.0601255	0.34483	0.80258	88342.9	0.0309464	0.0570979	0.567939	0.765028	11195.6	-0.398409	0.278058	0.129427	0.279275
MTEa	ERVL-MaLR	10558.6	0.034413	0.0592716	0.521387	0.863752	9754.98	0.0341625	0.0604577	0.447391	0.891039	11697.2	0.0597293	0.0613892	0.306797	0.561155	1318.13	0.214693	0.294973	0.44228	0.628522
B1F	Alu	33559	0.0317328	0.0557826	0.555919	0.895485	30520.2	0.00754301	0.0555879	0.885747	0.999546	37431.3	0.072811	0.0579978	0.189759	0.422515	3578.59	-0.267569	0.263814	0.28291	0.472963
MT2_Mm	ERVL	232138	-0.521625	0.0787403	3.02115e-12	2.11481e-10	247470	-0.0203304	0.0664011	0.606551	0.949731	234010	-0.851154	0.0828486	5.63087e-26	4.86814e-24	32420.8	-1.16828	0.396184	0.00105383	0.00750281
L1_Mur1	L1	3039.53	-0.0330902	0.0764952	0.605805	0.913568	2770.14	-0.028067	0.0634471	0.47769	0.894586	3448.97	0.0390844	0.0712507	0.545931	0.750071	263.414	0.031698	0.350555	0.924376	0.960843
RMER4B	ERVK	5556.11	-0.0271845	0.0627537	0.633951	0.916872	5261.14	0.0273712	0.060574	0.496885	0.911476	5956.51	-0.0954248	0.0658047	0.123769	0.309747	1113.04	-1.50716	0.302126	1.54854e-07	4.4806e-06
RLTR10D	ERVK	221.54	-0.0392337	0.120427	0.558346	0.897799	227.428	0.0239623	0.0779756	0.354543		271.28	0.107657	0.147701	0.311447	0.56349	61.6442	-0.00245972	0.450704	0.992321	0.996393
Lx	L1	11526.3	0.117615	0.0646792	0.0410178	0.262614	9957.35	-0.0146555	0.0586894	0.708075	0.967193	13259.4	0.247001	0.0665867	8.9606e-05	0.000968356	1514.06	-0.165939	0.276707	0.525924	0.698736
Lx10	L1	2731.18	-0.0357681	0.0711442	0.559614	0.898188	2507.83	-0.0170109	0.0627745	0.656625	0.956645	2969.93	-0.0668804	0.0751388	0.326804	0.574473	388.22	0.0718805	0.301135	0.802123	0.888093
MER119	hAT-Charlie	197.292	-0.0767932	0.134076	0.285687	0.722821	166.209	-0.0624564	0.110557	0.0343443		206.952	-0.226443	0.188205	0.0694451	0.215121	43.073	-0.503601	0.487993	0.21951	0.399639
B1_Mm	Alu	36424.2	0.406294	0.0687723	3.75264e-10	2.31781e-08	33397.8	0.386882	0.0918385	1.45218e-06	7.68043e-05	40811.2	0.457287	0.0727103	4.92944e-11	1.67425e-09	8254	0.533306	0.459667	0.185313	0.356499
L1Md_T	L1	45519.1	0.193852	0.0679463	0.00179503	0.0254701	36561.3	-0.092334	0.0856857	0.0686011	0.441272	47967	0.0921747	0.0592135	0.104041	0.279005	2730.41	0.858693	0.373459	0.0117881	0.0496546
L2a	L2	15538.9	-0.00728598	0.0575635	0.896761	0.983491	14131.2	-0.0165707	0.0566765	0.678681	0.964335	17116.9	-9.33385e-05	0.059443	0.998625	0.999224	1622.53	-0.0564349	0.284518	0.830418	0.903972
MTD	ERVL-MaLR	41045.7	-0.0319941	0.0565579	0.536539	0.880182	39619.8	0.0571645	0.0658072	0.17798	0.70724	43075.1	-0.162842	0.0613698	0.00513444	0.0303348	4554.05	0.074463	0.263597	0.770502	0.869387
MTC	ERVL-MaLR	23284.8	0.000925042	0.0562051	0.998106	0.99932	22378.8	0.0784009	0.071806	0.0967089	0.54157	24205	-0.152559	0.0608515	0.00834044	0.0439336	2631	0.169581	0.260726	0.498399	0.676152
L1M5	L1	8494.94	0.0364847	0.0627626	0.513701	0.861639	7903.94	0.0418819	0.0636306	0.313878	0.79548	9378.22	0.0529064	0.0643252	0.381755	0.623005	999.695	-0.0202655	0.303569	0.940577	0.970072
B1F2	Alu	14701.3	0.0644926	0.0588184	0.227279	0.666601	13562	0.0501728	0.0636849	0.247929	0.767573	16025.5	0.050023	0.0601474	0.385966	0.625305	1579.49	-0.451446	0.268977	0.0769412	0.195866
L1MC	L1	2303.24	0.0325317	0.0721918	0.600586	0.911294	2039.52	-0.0225939	0.0639494	0.559268	0.93081	2623.8	0.126998	0.0769738	0.0732838	0.222661	314.571	-0.17265	0.33614	0.577393	0.739592
L1MEg	L1	3384.28	0.0552118	0.0699513	0.364395	0.793893	3099.85	0.028534	0.0632017	0.476075	0.894586	3812.77	0.126447	0.0728055	0.0623384	0.199609	182.991	0.0192982	0.277677	0.943601	0.971591
Lx5b	L1	7040.35	-0.272836	0.0683191	1.2072e-05	0.000372813	6718.77	-0.106828	0.0842742	0.0448453	0.333573	7421.14	-0.415168	0.0725805	1.96711e-09	5.05599e-08	896.447	0.0130876	0.28029	0.963988	0.983099
L1MB7	L1	5149.47	-0.0630736	0.0652176	0.273984	0.712087	4744.04	-0.0283353	0.0616385	0.46298	0.894586	5679.36	-0.0591813	0.066516	0.344738	0.588682	797.886	-0.0270798	0.275473	0.914683	0.955361
B3A	B2	51149.2	0.0674821	0.0565322	0.184395	0.615436	45567.4	-0.00212593	0.0551139	0.967857	0.999546	56171	0.0771415	0.05853	0.192908	0.42664	8199.34	-0.302666	0.256975	0.216684	0.396003
RMER15	ERVL	13524.4	0.0249541	0.0580422	0.629494	0.916687	12648.8	0.0465546	0.0629442	0.284951	0.767573	14620.7	-0.0140352	0.0606466	0.807462	0.913076	2185.17	0.00614769	0.27426	0.983946	0.992591
RLTR20B4_MM	ERVK	119.341	0.0338427	0.128713	0.568177	0.903169	104.444	0.000937019	0.0756254	0.961292		132.622	0.068198	0.166975	0.500509	0.713619	12.0379	-0.576402	0.88955	0.219098	0.399227
B1F1	Alu	16216.8	-0.0312212	0.0576435	0.551883	0.892877	14994.9	-0.00643241	0.0561142	0.865658	0.990512	18239	0.0282611	0.0593198	0.618387	0.800117	1592.9	-0.357372	0.274214	0.168949	0.333997
MLT1A	ERVL-MaLR	1801.92	0.0756964	0.0791326	0.248097	0.683791	1548.65	-0.0291496	0.0682512	0.445875	0.891039	1917.98	0.0109244	0.079209	0.881427	0.953156	253.853	0.0493574	0.340029	0.878681	0.933354
RLTRETN_Mm	ERVK	893.634	0.0655282	0.0919464	0.359284	0.789221	781.353	-0.00935035	0.0672599	0.791381	0.986811	939.743	-0.0148114	0.096744	0.860527	0.943324	347.309	0.0376046	0.310733	0.89972	0.946469
RMER1B	Other	9410.3	-0.155533	0.0671916	0.00910959	0.087753	9177.6	0.00272534	0.0570334	0.954938	0.999546	10007	-0.264045	0.067911	3.92586e-05	0.000444463	994.255	-0.250655	0.265392	0.320353	0.51303
L1_Mus1	L1	16182.3	0.109605	0.0667805	0.0628911	0.349276	13129.3	-0.16484	0.0937134	0.00795943	0.0977175	17264.1	0.0378887	0.0665977	0.491784	0.706475	1336.38	-0.0180776	0.333745	0.954211	0.977505
Lx3A	L1	8303.01	-0.265161	0.0696329	2.74896e-05	0.000773454	7908.43	-0.106401	0.0836421	0.043652	0.333573	8926.92	-0.342858	0.0680298	1.20351e-07	2.38445e-06	676.259	0.00672919	0.355815	0.981935	0.991799
MLT1B	ERVL-MaLR	4426.24	0.0795255	0.0669298	0.177097	0.603738	3972.55	0.0156986	0.0602001	0.689061	0.965473	4744.37	0.0249469	0.0672348	0.694472	0.847314	595.733	0.0864923	0.273605	0.741747	0.85253
MTB	ERVL-MaLR	14901.5	0.0433126	0.060429	0.418522	0.819866	15600.4	0.374202	0.0850865	6.62623e-07	4.50583e-05	15127.6	-0.163818	0.0725513	0.0156549	0.0719217	976.71	0.368834	0.317943	0.213804	0.392599
MLT1C	ERVL-MaLR	3042.55	0.0618796	0.0728875	0.320143	0.755122	2711.26	0.000244169	0.0623439	0.994989	0.999546	3312.52	0.0507606	0.0715381	0.447924	0.664674	489.943	0.238159	0.269159	0.354451	0.547251
L1_Mm	L1	5839.78	-0.161965	0.0855323	0.022551	0.176618	5137	-0.0323937	0.0835027	0.18199	0.70724	6456.21	-0.158332	0.0820294	0.0342118	0.12759	683.236	-0.0255481	0.476811	0.94604	0.973123
IAPEY2_LTR	ERVK	590.773	0.051387	0.102031	0.479877	0.840968	535.303	0.013852	0.0704766	0.670633	0.964335	631.088	0.0114946	0.109458	0.900711	0.964613	163.952	-1.92406	0.642794	0.000378797	0.00326172
IAPEy-int	ERVK	375.537	0.107239	0.127204	0.180421	0.611102	341.252	0.0299171	0.0783327	0.312845		429.416	0.232462	0.155596	0.046363	0.160917	53.8785	-0.843656	0.533733	0.0551057	0.154541
ERVB4_1B-I_MM-int	ERVK	1449.93	-0.240052	0.0988703	0.003142	0.0379207	1400.2	-0.0438225	0.074512	0.273502	0.767573	1615.98	-0.211129	0.0881259	0.0078748	0.0425507	232.071	-0.249026	0.295609	0.370049	0.562659
RMER16A3	ERVK	72.1197	0.0244511	0.132985	0.626097	0.916687	54.4382	-0.0163366	0.0789652	0.274183		76.3901	0.0165415	0.170917	0.856682	0.941855	3.28222	0.251337	0.834975	0.494802	0.673383
IAPEY3_LTR	ERVK	196.453	0.155295	0.189595	0.0753211	0.375444	164.607	0.0146317	0.0762066	0.517417		181.707	-0.0336194	0.151757	0.765722	0.891536	56.9949	0.07788	0.384521	0.824863	0.900839
L1Md_Gf	L1	1127.42	-0.013252	0.0865741	0.845185	0.979518	937.279	-0.197852	0.155056	0.0111073	0.132177	1218.33	-0.0539151	0.093906	0.515221	0.72913	151.227	1.72266	0.409643	5.43176e-06	9.46806e-05
MMETn-int	ERVK	4631.31	0.0946159	0.0753556	0.139684	0.533761	3889.33	-0.0562004	0.0754996	0.181878	0.70724	5741.34	0.416812	0.08443	1.45176e-07	2.81761e-06	1645.45	-0.145023	0.305783	0.611089	0.763157
ERVB4_1C-LTR_Mm	ERVK	384.284	-0.0314437	0.106839	0.657144	0.923275	372.638	0.0138046	0.0728114	0.626919		431.077	-0.00453225	0.118969	0.961191	0.991126	78.532	1.3065	0.382169	0.000195421	0.00190234
ETnERV-int	ERVK	3544.29	-0.0330287	0.0784636	0.611814	0.913568	2866.25	-0.386626	0.116789	4.79556e-05	0.00126816	3598.5	-0.258844	0.0916103	0.00171638	0.0124601	276.187	0.975191	0.435773	0.0113641	0.0481245
MLT1D	ERVL-MaLR	4078.7	0.00838434	0.0653288	0.905233	0.983622	3850.26	0.0428086	0.0663018	0.314993	0.79548	4490.46	0.0140413	0.0674904	0.82639	0.924585	590.752	0.619739	0.331398	0.0437203	0.130841
L4_C_Mam	RTE-X	211.483	-0.0119265	0.118765	0.848778	0.980262	201.632	0.00710626	0.0744615	0.760594		245.255	0.0544203	0.147772	0.59797	0.786541	36.3062	0.486644	0.491716	0.241068	0.425416
MER45C	hAT-Tip100	44.0823	-0.0194862	0.135477	0.64413	0.921439	45.7348	0.00524659	0.0769538	0.703173		61.054	0.117784	0.210614	0.222054	0.4631	5.94502	0.201927	0.777942	0.625894	0.775238
L1VL4	L1	5821.11	0.188285	0.0763379	0.00451146	0.0503939	4919.15	-0.0056488	0.0592178	0.911859	0.999546	6509.42	0.246576	0.0748277	0.000404417	0.0035944	576.714	0.0525653	0.354666	0.87477	0.931408
L1_Mus4	L1	5786.62	0.0306037	0.0679615	0.607907	0.913568	4975.38	-0.0808811	0.079868	0.0938119	0.5379	6206.25	-0.0249786	0.069751	0.702006	0.847314	550.804	-0.355532	0.299674	0.205848	0.382684
RLTR6B_Mm	ERV1	1606.49	-0.374152	0.0937647	7.48858e-06	0.000245719	1614.33	-0.0361774	0.073916	0.338583	0.798484	1684.3	-0.548608	0.0950953	9.31983e-10	2.53233e-08	270.262	0.259189	0.363154	0.436735	0.624356
L1MA4A	L1	859.974	0.102095	0.0990949	0.173178	0.596188	765.088	0.0191477	0.0691615	0.585895	0.943483	1007.84	0.289388	0.104526	0.00170598	0.0124601	143.384	-0.239425	0.312707	0.412131	0.602534
L1MB3	L1	3349.05	-0.108274	0.0731354	0.0849872	0.409342	3028.37	-0.0944793	0.0880369	0.0592191	0.407318	3567.21	-0.208304	0.0738513	0.00241267	0.016937	482.431	-0.0238382	0.302014	0.930764	0.964279
Lx8b	L1	9286.15	-0.125859	0.0632842	0.0247286	0.188152	8773.32	-0.0283681	0.059295	0.478855	0.894586	10056.6	-0.178331	0.0634825	0.00318001	0.0212971	1447.37	0.0673741	0.316898	0.82463	0.900839
RMER17A2	ERVK	1134.65	0.0285004	0.0838978	0.679652	0.925672	1000.15	-0.0229193	0.0680148	0.530711	0.91198	1255.43	0.0514786	0.0893484	0.520798	0.731443	79.753	-0.484202	0.494733	0.241837	0.426322
LTR81B	Gypsy	89.571	0.0168177	0.131506	0.738297	0.934863	84.7882	0.00899581	0.0769753	0.575337		104.625	0.0868979	0.18775	0.370232	0.612697	4.04933	-0.0657463	0.761386	0.868108	0.927992
MusHAL1	L1	6864.82	0.0569351	0.0682544	0.3385	0.774619	6407.92	0.0429406	0.0736696	0.284297	0.767573	6489.45	-0.369744	0.0727956	8.44888e-08	1.73418e-06	295.434	-0.149049	0.369065	0.654814	0.795442
ORR1B1	ERVL-MaLR	8887.16	0.0174553	0.0605081	0.749852	0.9362	8045.96	-0.00765686	0.0569295	0.843578	0.986811	9506.98	-0.0501503	0.0621712	0.391671	0.626223	2278.18	-0.270564	0.303041	0.340073	0.533098
Lx6	L1	9382.95	-0.164653	0.0712515	0.00856022	0.0840022	9164.73	-0.0022543	0.0579635	0.975652	0.999546	9872.06	-0.309052	0.0713511	4.32023e-06	6.32083e-05	1297.83	-0.200223	0.29156	0.463812	0.647291
RLTR13A1	ERVK	156.093	0.00761985	0.121347	0.903401	0.983622	152.684	0.0185367	0.0774183	0.410507		158.986	-0.0851699	0.163254	0.414521	0.637879	22.5535	-0.0796599	0.554539	0.852192	0.91784
RLTR20B3	ERVK	273.805	0.0182371	0.113004	0.790366	0.955962	255.688	0.0133386	0.0743102	0.606831		308.184	0.0740079	0.13447	0.468032	0.682666	39.6606	0.121513	0.424749	0.74694	0.855689
MIRb	MIR	28072.6	0.00816669	0.0566368	0.855875	0.981947	25980.5	0.0187747	0.0565082	0.636601	0.953551	31472.4	0.0636294	0.0585501	0.253797	0.500748	2422.81	0.145271	0.286866	0.595647	0.752312
RMER12C	ERVK	1509.12	0.147512	0.0906952	0.0439555	0.274722	1246.38	-0.0359981	0.0719425	0.358899	0.813503	1689.07	0.213029	0.0926066	0.0100942	0.0510616	211.696	0.425475	0.377484	0.214269	0.393022
L1MC4	L1	3359.56	0.0309376	0.069251	0.609061	0.913568	3073.41	0.0132797	0.0603646	0.712807	0.967193	3731.61	0.0646851	0.0698574	0.322981	0.571979	563.454	-0.039607	0.281028	0.879827	0.933967
HAL1ME	L1	665.441	0.118047	0.117049	0.142407	0.533761	614.225	0.059628	0.0912478	0.13638	0.63686	748.026	0.209792	0.116281	0.0319483	0.124823	70.0828	0.473724	0.438068	0.217047	0.396379
MER58B	hAT-Charlie	1512.15	0.0429135	0.0791839	0.516763	0.862252	1408.16	0.037909	0.0703719	0.3377	0.798484	1598.38	-0.0414527	0.0826938	0.581548	0.77567	249.486	-0.00725106	0.307024	0.977725	0.989512
RLTR9A3	ERVK	355.269	-0.0566295	0.113726	0.436123	0.831087	355.139	0.0206609	0.074136	0.497809		384.305	-0.112354	0.145922	0.288734	0.540603	53.4397	0.226567	0.411273	0.537234	0.707113
RMER16-int	ERVK	3316.37	-0.0802172	0.0716998	0.193706	0.620094	3101.49	-0.018105	0.0614717	0.640001	0.953551	3489.52	-0.213209	0.0759688	0.00243993	0.016937	534.83	0.440497	0.289446	0.107463	0.246685
MMERVK9E_I-int	ERVK	3454.68	-0.116522	0.0733512	0.064794	0.350689	3235.09	-0.0329521	0.0645337	0.385016	0.840677	3524.58	-0.35883	0.0755043	4.5866e-07	7.93065e-06	593.979	-0.324552	0.289887	0.234683	0.417563
RLTR6-int	ERV1	10211.4	0.069653	0.0678356	0.240319	0.683791	8278.93	-0.213803	0.105881	0.00324332	0.0532351	11509.2	0.142645	0.0715149	0.0323238	0.124969	719.87	-0.199017	0.337088	0.521865	0.695139
ORR1G	ERVL-MaLR	2714.01	0.0165248	0.0697529	0.777006	0.94757	2475.02	0.00261078	0.0621223	0.945791	0.999546	2923.46	-0.029239	0.0727387	0.664811	0.828847	312.919	0.260917	0.283799	0.333195	0.526364
RMER1A	Other	3672.44	-0.0426341	0.0705187	0.484262	0.843243	3373.9	-0.019355	0.0611949	0.590668	0.943483	3921.65	-0.124599	0.0721915	0.0634966	0.201814	446.92	0.470603	0.266538	0.064089	0.172315
L2b	L2	10035.2	-0.00865355	0.0591484	0.880249	0.981947	9106.69	-0.0177906	0.0575849	0.618458	0.949775	11214.6	0.0360249	0.0618348	0.540455	0.748141	753.458	0.000790427	0.281135	0.999994	0.999994
L1M3	L1	3610.19	-0.0170916	0.0662369	0.770043	0.94757	3358.42	0.00804378	0.0594247	0.834179	0.986811	4005.28	0.00558807	0.0693589	0.932384	0.977616	355.499	-0.318312	0.301304	0.259839	0.446485
URR1A	hAT-Charlie	9759.78	0.00689192	0.0609867	0.900987	0.983491	8842.23	-0.0125416	0.0579221	0.750477	0.978173	10684.3	-0.00064273	0.0642854	0.99053	0.99792	1561.53	-0.129307	0.285153	0.631746	0.779507
ERVB7_4-LTR_MM	ERVK	72.244	0.0257707	0.132905	0.591176	0.910071	67.1587	0.00917833	0.0770382	0.56348		81.4795	0.0759034	0.182224	0.431248	0.652015	9.89118	-0.00284835	0.655508	0.992181	0.996352
L2	L2	26993.7	-0.117291	0.0602864	0.0310636	0.220384	26244.5	0.019554	0.0564148	0.637398	0.953551	29578.8	-0.129407	0.0623176	0.026497	0.108615	1208.68	0.19289	0.283335	0.474663	0.656453
L1MC2	L1	1060.69	-0.0493899	0.0868743	0.473275	0.837759	968.349	-0.0239714	0.0701065	0.500667	0.911476	1132.62	-0.131138	0.0942446	0.114804	0.297489	191.179	0.331046	0.309787	0.255603	0.441855
RLTR13G	ERVK	596.063	0.0478744	0.106059	0.510851	0.86061	510.221	-0.0180653	0.0732167	0.547211	0.924799	686.236	0.16608	0.13016	0.109243	0.289917	60.8959	-0.109815	0.481357	0.783297	0.877198
Lx4A	L1	5727.05	-0.110676	0.0663598	0.058939	0.334586	5401.6	-0.020867	0.0602171	0.585476	0.943483	5963.85	-0.28098	0.0689757	1.59688e-05	0.000202484	1042.11	0.212112	0.289534	0.440862	0.627263
L1MC1	L1	2899.25	-0.087492	0.0726122	0.160778	0.574858	2664.01	-0.0445141	0.0697692	0.288818	0.767573	3168.37	-0.111069	0.0733187	0.102501	0.278509	536.712	0.0799797	0.273075	0.760711	0.863634
MTE2a	ERVL-MaLR	11643.4	-0.165781	0.0647199	0.00425702	0.0480631	11045.1	-0.0415141	0.0634561	0.315853	0.79548	12456.8	-0.253489	0.063838	2.53565e-05	0.000305241	1202.29	0.236649	0.281624	0.377291	0.56927
MLT2B4	ERVL	891.195	-0.00878808	0.0879204	0.897287	0.983491	834.726	0.0131113	0.0679521	0.71328	0.967193	965.245	-0.0438869	0.0970255	0.604609	0.790898	111.794	0.637696	0.361133	0.0533783	0.15101
L1MD	L1	3767.29	0.034629	0.0698445	0.570624	0.903169	3443.53	0.0156915	0.0604192	0.692281	0.965473	3970.97	-0.0655663	0.070615	0.320098	0.568996	449.583	-0.301718	0.387974	0.385382	0.577053
Lx3C	L1	7433.69	0.0441397	0.0665836	0.451967	0.833425	7283.73	0.172432	0.0969472	0.00756751	0.097355	7635.8	-0.125991	0.069951	0.0519404	0.174061	452.589	0.570581	0.296766	0.0411975	0.125462
L4_B_Mam	RTE-X	136.299	0.0100766	0.122672	0.869849	0.981947	128.482	0.00920235	0.0754925	0.66492		157.191	0.0806487	0.164017	0.43918	0.65877	15.595	1.67017	0.887063	0.00936907	0.0416051
MER5A	hAT-Charlie	8341.01	-0.0582107	0.061203	0.291164	0.726182	7863.9	0.0151162	0.0577181	0.902166	0.999546	9228.62	-0.0443821	0.0623076	0.45278	0.666554	501.547	0.022248	0.286818	0.937089	0.967966
MER3	hAT-Charlie	1511.2	-0.0281523	0.0809716	0.670817	0.925672	1372.27	-0.0234997	0.0677569	0.526348	0.91198	1717.46	0.0456004	0.0828828	0.545616	0.750071	182.672	-0.203677	0.357684	0.532357	0.703509
[truncated: 974 more rows]
