# Supplementary material for: Obox4 promotes zygotic genome activation upon loss of Dux
Source: eLife. 2024 Jun 24;13:e95856. doi: 10.7554/eLife.95856 (PMC11196112; doi:10.7554/eLife.95856)
Supplement: Supplementary file 10. [file elife-95856-supp10.xlsx]

## Sheet: Sheet1
# Supplementary Table 10
# Sequences of primers used in this study
Name	Sequence (5' to 3')
Dux_clone_Fwd	GCATATGCAGGAATTCATGGCAGAAGCTGGCAGCCCTGTTGG
Dux_clone_Rev	GCTTGATATCGAATTCTCAGAGCATATCTAGAAGAGTCTGATATTC
Obox4_clone_Fwd	GCATATGCAGGAATTCATGTCCAAAGATTCCTCCTTGCATCC
Obox4_clone_Rev	GCTTGATATCGAATTCGCGCTATAGAGACATCATGGCAT
Emx2_clone_Fwd	GCATATGCAGGAATTCATGTTTCAGCCGGCGCCC
Emx2_clone_Rev	GCTTGATATCGAATTCTTAATCGTCTGAGGTCACATCTATTTCCTC
Hoxd13_clone_Fwd	GCATATGCAGGAATTCATGAGCCGCTCGGGGACTTG
Hoxd13_clone_Rev	GCTTGATATCGAATTCTCAGGAGACAGTGTCTTTGAGCTTGG
Actb_qPCR_Fwd	gtgtgacgttgacatccgtaaagac
Actb_qPCR_Rev	gatcttcatggtgctaggagcca
MERVL_Gag_qPCR_Fwd	aaacaggctcctagaggggag
MERVL_Gag­_qPCR_Rev	tccacccttatcccacaccc
Dux_pGEX_Fwd	TGGGATCCCCGAATTCTGGGGTAGAAATCCTGGCAGC
Dux_pGEX_Rev	GTCGACCCGGGAATTCTCATGCTTGAGTGCGGGCATCTTC
Dux_pMAL_Fwd	CGGCACACTACGTAGAATTCTGGGGTAGAAATCCTGGCAGC
Dux_pMAL_Rev	CTAGAGGATCCGAATTCTCATGCTTGAGTGCGGGCATCTTC
Obox4_pGEX_Fwd	TGGGATCCCCGAATTCATGTCCAAAGATTCCTCCTTGCATCC
Obox4_pGEX_Rev	GTCGACCCGGGAATTCTCACACGGTGCGTTCCTTTCGAC
Obox4_pMAL_Fwd	CGGCACACTACGTAGAATTCATGTCCAAAGATTCCTCCTTGCATCC
Obox4_pMAL_Rev	CTAGAGGATCCGAATTCTCACACGGTGCGTTCCTTTCGAC
Obox2_pMAL_Fwd	CGGCACACTACGTAGAATTCATGGCGGAAGGTCCCTCCTTGC
Obox2_pMAL_Rev	CTAGAGGATCCGAATTCTCACACAGTTCGTTCTTTTCGAAACTTTCTTG
Gag_pGEX_Fwd	TGGGATCCCCGAATTCAATCTTTTAAAATACTGGAATTGGCTTGTTGATCC
Gag_pGEX_Rev	GTCGACCCGGGAATTCTCATACTTCCTCAGGTGGGGCAAACC
Gag_pMAL_Fwd	CGGCACACTACGTAGAATTCAATCTTTTAAAATACTGGAATTGGCTTGTTGATC
Gag_pMAL_Rev	CTAGAGGATCCGAATTCTCATACTTCCTCAGGTGGGGCAAACC
Dux_KO_A_Fwd	CACCAAGGCACACAGCCGCTTGCT
Dux_KO_A_Rev	AAACAGCAAGCGGCTGTGTGCCTT
Dux_KO_B_Fwd	CACCGACTTTCCCCACTAGTGGCT
Dux_KO_B_Rev	AAACAGCCACTAGTGGGGAAAGTC
Obox4_KO_A_Fwd	caccGGAAGAGCTGTACCCCTAGA
Obox4_KO_A_Rev	aaacTCTAGGGGTACAGCTCTTCC
Obox4_KO_B_Fwd	caccGAGAAGGAACAATGTGCCTA
Obox4_KO_B_Rev	aaacTAGGCACATTGTTCCTTCTC
Dux_KO_genotyping_A	AACTAGGGCATTTCTTACCCTGCTTGCC
Dux_KO_genotyping_B	ACCACTGCACATACATTAGAGACGTTTGG
Dux_KO_genotyping_C	CTGATAGACTGTGGGTTTCTTAGTGGC
Dux_KO_genotyping_D	ATAAACTAGAGGACAGAGCAAGTGGCC
Dux_KO_genotyping_E	ACAACACCTGATCTGCCTCTCACTCC
Dux_KO_genotyping_F	CAAACCCAACAAAGCCAACCCACC
Obox4_KO_genotyping_A	GAATCCTGATAACTGCTATCTAAGAGTCC
Obox4_KO_genotyping_B	AGGAACTTCACCGCCATAGCTGG
Obox4_KO_genotyping_C	CCTTCATGGCTCATTGGGTATTG
Obox4_KO_genotyping_D	CCATCTTTCACGATCAGAATGGC
Obox4_KO_genotyping_E	CCTCTAGTGACCCCAACACGTC
Obox4_KO_genotyping_F	GCCACTGCTGGAAGTAGGCCTA
Tardbp_qPCR_Fwd	gtggagctggcttgggaaataac
Tardbp_qPCR_Rev	cagaattagaaccactgtaggaattatttccag
