# Supplementary material for: Obox4 promotes zygotic genome activation upon loss of Dux
Source: eLife. 2024 Jun 24;13:e95856. doi: 10.7554/eLife.95856 (PMC11196112; doi:10.7554/eLife.95856)
Supplement: Supplementary file 11. [file elife-95856-supp11.xlsx]

## Sheet: Sheet1
# Supplementary Table 11
# Antisense oligo sequences used in this study
Name	Sequence (5' to 3')
ASO_scramble	/52MOErA/*/i2MOErG/*/i2MOErC/*/i2MOErG/*/i2MOErC/*G*G*G*T*A*T*T*G*A*A*/i2MOErC/*/i2MOErC/*/i2MOErA/*/i2MOErG/*/32MOErG/
ASO_Dux	/52MOErG/*/i2MOErA/*/i2MOErT/*/i2MOErT/*/i2MOErC/*C*T*G*C*G*G*T*T*C*T*/i2MOErG/*/i2MOErA/*/i2MOErA/*/i2MOErA/*/32MOErC/
ASO_Obox4	/52MOErA/*/i2MOErC/*/i2MOErT/*/i2MOErT/*/i2MOErG/*A*T*T*G*C*A*G*T*G*G*/i2MOErA/*/i2MOErC/*/i2MOErG/*/i2MOErT/*/32MOErG/
Modification	Chemical group
52MOEr	5’ 2-MethoxyEthoxy
32MOEr	3’ 2-MethoxyEthoxy
i2MOEr	Internal 2-MethoxyEthoxy
*	Phosphorothioate Bond
