# Supplementary material for: Obox4 promotes zygotic genome activation upon loss of Dux
Source: eLife. 2024 Jun 24;13:e95856. doi: 10.7554/eLife.95856 (PMC11196112; doi:10.7554/eLife.95856)
Supplement: Supplementary file 12. [file elife-95856-supp12.xlsx]

## Sheet: Sheet1
# Supplementary Table 12
# sgRNA sequences used in this study
Name	Sequence (5' to 3')	PAM
Dux_KO_A	AAGGCACACAGCCGCTTGCT	GGG
Dux_KO_B	GACTTTCCCCACTAGTGGCT	TGG
Obox4_KO_8	GGAAGAGCTGTACCCCTAGA	GGG
Obox4_KO_10	GAGAAGGAACAATGTGCCTA	TGG
