# Supplementary material for: Obox4 promotes zygotic genome activation upon loss of Dux
Source: eLife. 2024 Jun 24;13:e95856. doi: 10.7554/eLife.95856 (PMC11196112; doi:10.7554/eLife.95856)
Supplement: Supplementary file 13. [file elife-95856-supp13.xlsx]

## Sheet: Sheet1
# Supplementary Table 13
# Key resources table
REAGENT or RESOURCE	SOURCE		IDENTIFIER
Antibodies
Mouse Monoclonal Anti-GAG Antibody (clone C1)	This paper		N/A
Mouse Monoclonal Anti-OBOX4 Antibody (clone 7B12)	This paper		N/A
Mouse Monoclonal Anti-DUX Antibody (clone 15H12)	This paper		N/A
Anti-Oct4 Antibody	Abcam		Cat# ab181557; RRID: AB_2687916
Anti-FLAG® Monoclonal Antibody, Unconjugated, Clone M2	Merck		Cat# F3165; RRID: AB_439685
Anti-GAPDH Antibody	Abclonal		Cat# AC001; RRID: AB_2619673
Peroxidase-conjugated Sheep IgG Fraction to Mouse IgG (No Cross to Human) Antibody	MP Biomedicals		Cat# 0855558; RRID: AB_2334546
Goat Anti-Rabbit IgG (H+L) Antibody, HRP Conjugated	Immuno-Biological Laboratories		Cat# 17502; RRID: AB_494707
Goat Anti-Mouse IgG2a Cross-Adsorbed Secondary Antibody, Alexa Fluor 488	ThermoFisher		Cat# A-21131, RRID: AB_2535771
Goat Anti-Mouse IgG1 Cross-Adsorbed Secondary Antibody, Alexa Fluor 555	ThermoFisher		Cat# A-21127, RRID: AB_2535769
Rabbit (DA1E) mAb IgG XP® Isotype Control Antibody	Cell Signaling Technology		Cat# 3900; RRID: AB_1550038
Anti-FLAG Monoclonal antibody (clone 2H8)	Dr. Takehiko Yokomizo, Department of Biochemistry, Juntendo University		N/A
Bacterial and virus strains
Mach1™ T1 Phage-Resistant Chemically Competent Escherichia coli (E. coli)	Thermo Fisher		C862003
BL21(DE3) Competent Escherichia coli (E. coli)	NEB		C2527H
Chemicals, peptides, and recombinant proteins
Dulbecco’s Modified Eagle Medium (DMEM)	Nacalai Tesque		08488-55
Fetal Bovine Serum (FBS)	Biowest		S10581S1820
GlutaMax™	Gibco		35050061
Penicillin-Streptomycin	Gibco		15140163
Non-essential Amino Acids (NEAA)	Gibco		11140050
Sodium Pyruvate	Merck		S8636
2-mercaptoethanol	Wako		168-25293
CHIR99021	Wako		034-23103
PD0325901	Wako		168-25293
iMatrix-511 Silk	Matrixome		892021
GIT Medium	Wako		637-25715
Recombinant Human Interleukin-6 (IL-6)	PeproTech		20006
jetOPTIMUS® DNA Transfection Reagent	Polyplus		101000025
ISOGEN	Nippon Gene		311-02501
Chloroform	Wako		038-02606
Isopropanol	Merck		15-2320
Ethanol	Wako		057-00456
Hygromycin	Wako		089-06151
G418	Wako		078-05961
Puromycin	Wako		160-23151
Trypsin-EDTA	Gibco		25200072
FluoroBrite™ DMEM	Gibco		A1896701
Cell Strainer	Falcon		352235
Phosphate-buffered Saline (PBS)	Nakalai Tesque		14249-95
Sample Buffer Solution with Reducing Reagent	Nakalai Tesque		09499-14
AllView PAGE Buffer®	BioDynamics Laboratory		DS520
Amersham™ Protran™ Premium 0.45 μm NC Nitrocellulose Blotting Membrane	Cytiva		10600003
Polyoxyethylene(20) Sorbitan Monolaurate	Wako		167-11515
Skim Milk	Morinaga		490272013292
ECL™ Prime Western Blotting Detection Reagents	Cytiva		RPN2232
Hyperfilm™ ECL™	Cytiva		28906839
Vacuum Filter	Corning		430769
CARD HyperOva	Kyudo		KYD-010-EX
Human Chorionic Gonadotropin (hCG)	ASKA Animal Health		GONATROPIN
Potassium Simplex Optimization Medium (KSOM)	Merck		MR-101-D
Hyaluronidase	Merck		H4272
Liquid Paraffin	Nacalai Tesque		26137-85
Acidic Tyrode’s Solution	Merck		MR-0040-D
Paraformaldehyde	Nacalai Tesque		09154-14
Triton™ X-100	Bio-Rad		1610407
Bovine Serum Albumin (BSA)	Wako		011-27055
4′,6-diamidino-2-phenylindole (DAPI)	Nacalai Tesque		19178-91
Glass Bottom Dish	Matsunami		D11130H
Glass Bottom Chamber Slide	Matsunami		SCS-N02
ProLong™ Glass Antifade Mountant	Thermo Fisher		P36982
Critical commercial assays
TURBO DNA-free­™ Kit	Thermo Fisher		AM1907
Transcriptor First Strand cDNA Synthesis Kit	Roche		4379012001
PrimeSTAR® MAX DNA Polymerase	TaKaRa		R045A
NEBuilder® HiFi DNA Assembly Master Mix	NEB		E2621L
mMESSAGE mMACHINE™ T7 Transcription Kit	Thermo Fisher		AM1344
Poly(A) Tailing Kit	Thermo Fisher		AM1350
RNeasy Mini Kit	Qiagen		74004
SMART-Seq® Stranded Kit	TaKaRa		634442
SMARTer® RNA Unique Dual Index Kit	TaKaRa		634451
NEBNext® Ultra™ II Directional RNA Library Prep Kit for Illumina	NEB		E7760L
NEBNext® Multiplex Oligos for Illumina	NEB		E6440S
High Sensitivity DNA Kit	Agilent		5067-4626
CUT&RUN Assay Kit	Cell Signaling Technology		86652
NEBNext® Ultra™ II DNA Library Prep Kit for Illumina	NEB		E7645L
Deposited data
scRNA-seq	Deng et al., 2014		GEO: GSE45719
Ribo-seq	Xiong et al., 2022		GEO: GSE165782
RNA-seq	Shen et al., 2021		GEO: GSE168728
RNA-seq	Chen & Zhang, 2019		GEO: GSE121746
RNA-seq	De Iaco et al., 2019		GEO: GSE141321
ChIP-seq	Hendrickson et al., 2017		GEO: GSE85632
RNA-seq and CUT&RUN-seq	This paper		GEO: GSE196671
Experimental models: Cell lines
EB3 mouse embryonic stem cells	RIKEN BRC Cell Bank		AES0139
SP2/O-Ag14 hybridoma	RIKEN BRC Cell Bank		RCB0209
2C::tdTomato mouse embryonic stem cells	This paper		N/A
TRE-3×FLAG-Obox4 mouse embryonic stem cells	This paper		N/A
Obox4 knockout mouse embryonic stem cells	This paper		N/A
Dux knockout mouse embryonic stem cells	This paper		N/A
Obox4/Dux double knockout mouse embryonic stem cells	This paper		N/A
Anti-Obox4 hybridoma clone 7B12	This paper		N/A
Anti-Gag hybridoma clone C1	This paper		N/A
Anti-Dux hybridoma clone 15H12	This paper		N/A
Experimental models: Organisms/strains
BDF1	Japan SLC		Slc:BDF1
BALB/c	Japan SLC		BALB/cCrSlc
Oligonucleotides
Primers for cloning, plasmid construction, and genotyping, see Supplementary Table 8	This paper		N/A
ASO targeting sequence, see Supplementary Table 9	This paper		N/A
sgRNA targeting sequence, see Supplementary Table 10	This paper		N/A
Recombinant DNA
2C::tdTomato Reporter	Addgene		40281
ERVK::tdTomato Reporter	This paper		N/A
pMAX-GFP	Lonza		N/A
pCAGGS-3×FLAG	This paper		N/A
pCAGGS-3×FLAG-Dux	This paper		N/A
pCAGGS-3×FLAG-Obox4	This paper		N/A
pCAGGS-3×FLAG-Emx2	This paper		N/A
pCAGGS-3×FLAG-Hoxd13	This paper		N/A
pGEX-Obox4	This paper		N/A
pMAL-Obox4	This paper		N/A
pGEX-Obox2	This paper		N/A
pGEX-Gag	This paper		N/A
pMAL-Gag	This paper		N/A
pGEX-Dux	This paper		N/A
pMAL-Dux	This paper		N/A
pX330-DuxKO-A	This paper		N/A
pX330-DuxKO-B	This paper		N/A
pX330-Puro-Obox4KO-1	This paper		N/A
pX330-Puro-Obox4KO-2	This paper		N/A
pX330-Puro-Obox4KO-6	This paper		N/A
pX330-Puro-Obox4KO-7	This paper		N/A
pPB-TRE-3×FLAG-Obox4	This paper		N/A
pPB-CAG-rtTA3G-IRES-Hygro	This paper		N/A
pCMV-HyPBase-PGK-Puro	This paper		N/A
Software and algorithms
fastp	Chen et al., 2018		https://github.com/OpenGene/fastp
STAR	Dobin et al., 2013		https://github.com/alexdobin/STAR
Subread	Liao et al., 2014		http://subread.sourceforge.net
Seurat	Stuart et al., 2019		https://github.com/satijalab/seurat
Bcl2fastq2	Illumina		https://support.illumina.com/downloads/bcl2fastq-conversion-software-v2-20.html
DESeq2	Love et al., 2014		https://github.com/mikelove/DESeq2
Bowtie2	Langmead and Salzberg, 2012		https://github.com/BenLangmead/bowtie2
MACS3	Zhang et al., 2008		https://github.com/macs3-project/MACS
deepTools	Ramírez et al., 2016		https://github.com/deeptools/deepTools
ChIPseeker	Yu et al., 2015		https://github.com/YuLab-SMU/ChIPseeker
MEME Suite	Bailey et al., 2009		https://meme-suite.org/meme/
MANorm2	Tu et al., 2021		https://github.com/tushiqi/MAnorm2
trackplot	Pohl and Beato, 2014		https://github.com/PoisonAlien/trackplot
Other
ProFlex™ PCR System	Thermo Fisher		4484073
SH800Z Cell Sorter	Sony		SH800Z
ChemiDoc MP Imaging System	Bio-Rad		17001402JA
FemtoJet® 4i Programmable Microinjector	Eppendorf		5252000013
FV3000 Confocal Laser Scanning Microscope	Olympus		FV3000
